# Supplementary material for: Towards In Silico Identification of Genes Contributing to Similarity of Patients’ Multi-Omics Profiles: A Case Study of Acute Myeloid Leukemia
Source: MDPI journal article supplement (doi:10.3390/genes14091795), 2023-09-13
Supplement: s1 [file s1]

**Table S1.** Patients' characteristics

| <b>Gender</b>             | <b>Total</b> | <b>Mutations</b>        |     |
|---------------------------|--------------|-------------------------|-----|
| Male                      | 58           | <b><i>IDH1_r140</i></b> |     |
| Female                    | 54           | positive                | 8   |
| <b>Age</b>                |              | negative                | 102 |
| <60 years                 | 68           | not known               | 2   |
| ≥60 years                 | 44           | <b><i>IDH1_r172</i></b> |     |
| Median age (range)        | 55 (21–88)   | positive                | 2   |
| Average age               | 53           | negative                | 108 |
| <b>Vital status</b>       |              | not known               | 2   |
| Dead                      | 60           | <b>activating ras</b>   |     |
| Alive                     | 52           | positive                | 6   |
| <b>FAB classification</b> |              | negative                | 105 |
| M0                        | 11           | not known               | 1   |
| M1                        | 31           | <b><i>NPM1c</i></b>     |     |
| M2                        | 27           | positive                | 24  |
| M3                        | 11           | negative                | 87  |
| M4                        | 20           | not known               | 1   |
| M5                        | 11           | <b><i>BCR::ABL1</i></b> |     |
| not classified            | 1            | positive                | 1   |
| <b>ELN risk category</b>  |              | negative                | 10  |
| poor                      | 29           | not known               | 101 |
| intermediate/normal       | 58           | <b><i>PML::RARA</i></b> |     |
| favourable                | 24           | positive                | 4   |
| not known                 | 1            | negative                | 5   |
| <b>Mutations</b>          |              | not known               | 103 |
| <b><i>IDH1_r132</i></b>   |              | <b><i>FLT3-ITD</i></b>  |     |
| positive                  | 12           | positive                | 32  |
| negative                  | 98           | negative                | 76  |
| not known                 | 2            | not known               | 4   |
