# Supplementary material for: Towards In Silico Identification of Genes Contributing to Similarity of Patients’ Multi-Omics Profiles: A Case Study of Acute Myeloid Leukemia
Source: MDPI journal article supplement (doi:10.3390/genes14091795), 2023-09-13
Supplement: s1 [file s1]

**Table S2.** Immunophenotypic characteristics of patients by cluster.

| Characteristic | Test result | Cluster |    |    |    |    |
|----------------|-------------|---------|----|----|----|----|
|                |             | 1       | 2  | 3  | 4  | 5  |
| CD3            | not tested  | 25      | 25 | 28 | 11 | 20 |
|                | positive    | 0       | 0  | 0  | 0  | 0  |
|                | negative    | 2       | 0  | 1  | 0  | 0  |
| CD5            | not tested  | 21      | 19 | 22 | 9  | 15 |
|                | positive    | 1       | 0  | 1  | 0  | 0  |
|                | negative    | 5       | 6  | 6  | 2  | 5  |
| CD7            | not tested  | 25      | 25 | 28 | 11 | 17 |
|                | positive    | 2       | 0  | 1  | 0  | 1  |
|                | negative    | 0       | 0  | 0  | 0  | 2  |
| CD10           | not tested  | 27      | 25 | 28 | 11 | 20 |
|                | positive    | 0       | 0  | 0  | 0  | 0  |
|                | negative    | 0       | 0  | 1  | 0  | 0  |
| CD14           | not tested  | 21      | 11 | 20 | 7  | 12 |
|                | positive    | 0       | 4  | 1  | 0  | 0  |
|                | negative    | 6       | 10 | 8  | 4  | 8  |
| CD15           | not tested  | 27      | 25 | 29 | 11 | 19 |
|                | positive    | 0       | 0  | 0  | 0  | 0  |
|                | negative    | 0       | 0  | 0  | 0  | 1  |
| CD19           | not tested  | 21      | 21 | 20 | 8  | 14 |
|                | positive    | 0       | 0  | 2  | 0  | 0  |
|                | negative    | 6       | 4  | 7  | 3  | 6  |
| CD20           | not tested  | 26      | 25 | 29 | 11 | 20 |
|                | positive    | 0       | 0  | 0  | 0  | 0  |
|                | negative    | 1       | 0  | 0  | 0  | 0  |
| CD23           | not tested  | 27      | 24 | 29 | 11 | 20 |
|                | positive    | 0       | 1  | 0  | 0  | 0  |
|                | negative    | 0       | 0  | 0  | 0  | 0  |
| CD25           | not tested  | 26      | 25 | 29 | 11 | 20 |
|                | positive    | 0       | 0  | 0  | 0  | 0  |
|                | negative    | 1       | 0  | 0  | 0  | 0  |
| CD33           | not tested  | 10      | 1  | 3  | 0  | 1  |
|                | positive    | 14      | 24 | 22 | 11 | 18 |
|                | negative    | 3       | 0  | 4  | 0  | 1  |
| CD34           | not tested  | 1       | 9  | 1  | 1  | 0  |
|                | positive    | 25      | 10 | 28 | 1  | 13 |
|                | negative    | 1       | 6  | 0  | 9  | 7  |
| CD45           | not tested  | 25      | 24 | 26 | 11 | 17 |
|                | positive    | 2       | 1  | 3  | 0  | 3  |
|                | negative    | 0       | 0  | 0  | 0  | 0  |
| CD56           | not tested  | 19      | 13 | 18 | 8  | 12 |
|                | positive    | 2       | 4  | 4  | 0  | 2  |
|                | negative    | 6       | 8  | 7  | 3  | 6  |
| CD117          | not tested  | 22      | 5  | 3  | 0  | 2  |

|          |            |    |    |    |    |    |
|----------|------------|----|----|----|----|----|
|          | positive   | 5  | 20 | 26 | 11 | 18 |
|          | negative   | 0  | 0  | 0  | 0  | 0  |
| HLA-DR   | not tested | 13 | 10 | 11 | 3  | 6  |
|          | positive   | 12 | 15 | 18 | 0  | 8  |
|          | negative   | 2  | 0  | 0  | 8  | 6  |
| MPX      | not tested | 1  | 2  | 3  | 1  | 2  |
|          | positive   | 18 | 18 | 25 | 10 | 17 |
|          | negative   | 8  | 5  | 1  | 0  | 1  |
| NSE      | not tested | 3  | 2  | 5  | 3  | 1  |
|          | positive   | 2  | 19 | 7  | 1  | 1  |
|          | negative   | 22 | 4  | 17 | 7  | 18 |
| other_CD | not tested | 20 | 8  | 20 | 8  | 11 |
|          | positive   | 1  | 11 | 2  | 1  | 0  |
|          | negative   | 6  | 6  | 7  | 2  | 9  |
| TdT      | not tested | 24 | 25 | 25 | 11 | 18 |
|          | positive   | 2  | 0  | 2  | 0  | 2  |
|          | negative   | 1  | 0  | 2  | 0  | 0  |

### Abbreviations

|        |                                                                                                                                                                                                                         |
|--------|-------------------------------------------------------------------------------------------------------------------------------------------------------------------------------------------------------------------------|
| CD     | cluster of differentiation markers (for full list and explanation see <a href="https://wiki.clinicalflow.com/cluster-differentiation-cd-markers">https://wiki.clinicalflow.com/cluster-differentiation-cd-markers</a> ) |
| HLA-DR | a molecule typically expressed by antigen-presenting cells and is associated with antigen presentation. Expressed on T cells and has been associated with T cell activation.                                            |
| MPX    | Myeloperoxidase (MPO) is a marker of myeloid differentiation                                                                                                                                                            |
| NSE    | Neuron-specific enolase is a substance that has been detected in patients with various tumors.                                                                                                                          |
| TdT    | Terminal deoxynucleotidyl transferase is a nuclear protein widely used as a marker for the diagnosis and classification of acute leukemia                                                                               |
