# Supplementary material for: Towards In Silico Identification of Genes Contributing to Similarity of Patients’ Multi-Omics Profiles: A Case Study of Acute Myeloid Leukemia
Source: MDPI journal article supplement (doi:10.3390/genes14091795), 2023-09-13
Supplement: s1 [file s1]

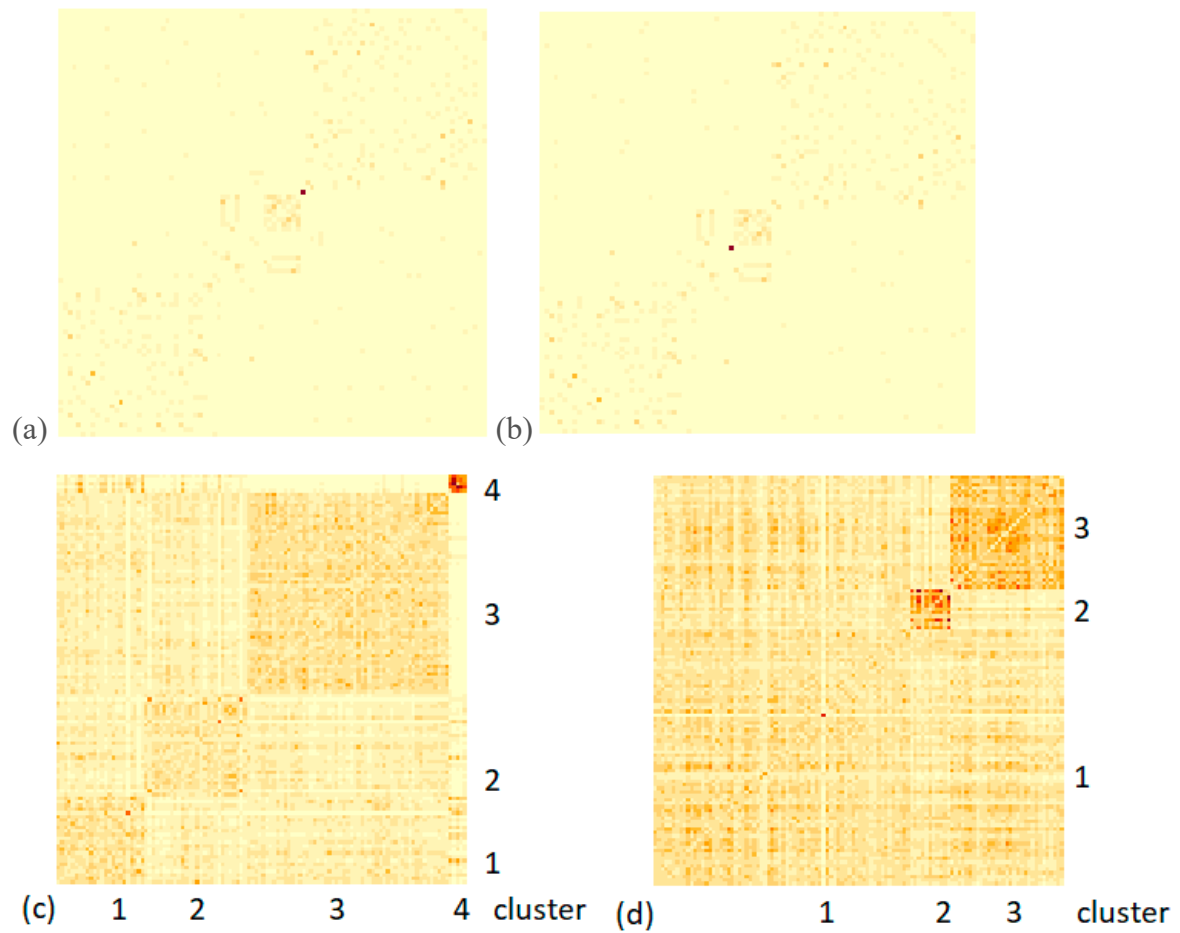

**Figure S1.** Heatmap of patients' clustering results using: (a) mRNA data (4 clusters); (b) mRNA data (3 clusters); (c) DNA methylation data (4 clusters) and (d) miRNA data (3 clusters). Darker colors indicate higher similarity.
