# Supplementary material for: Towards In Silico Identification of Genes Contributing to Similarity of Patients’ Multi-Omics Profiles: A Case Study of Acute Myeloid Leukemia
Source: Genes (Basel). 2023 Sep 13;14(9):1795. doi: 10.3390/genes14091795 (PMC10531350; doi:10.3390/genes14091795)
Supplement: Supplementary file 1 [file genes-14-01795-s001.zip]

Archive with 5 entries (5 files):
- Figure S1.pdf
- Supplementary Table S4.xlsx
- Table S1.pdf
- Table S2.pdf
- Table S3.xlsx
