# Supplementary material for: Towards In Silico Identification of Genes Contributing to Similarity of Patients’ Multi-Omics Profiles: A Case Study of Acute Myeloid Leukemia
Source: Genes (Basel). 2023 Sep 13;14(9):1795. doi: 10.3390/genes14091795 (PMC10531350; doi:10.3390/genes14091795)
Supplement: Supplementary file 1 [file genes-14-01795-s001.zip › Supplementary Table S4.xlsx]

## Sheet: Sheet1
Table S4. Enrichment of SIGs in GO biological processes and pathways terms

## Sheet: CL1 Enrichment
GroupID	Category	Term	Description	LogP	Log(q-value)	InTerm_InList	Genes	Symbols
1_Summary	Reactome Gene Sets	R-HSA-1280215	Cytokine Signaling in Immune system	-45.9527	-41.591	148/715	103,207,351,356,466,567,595,596,604,815,821,829,867,959,960,1026,1027,1230,1278,1385,1398,1399,1432,1436,1445,1958,1974,2247,2308,2353,2889,3091,3133,3146,3265,3312,3313,3383,3394,3553,3554,3556,3569,3570,3572,3574,3575,3586,3588,3600,3654,3662,3665,3688,3689,3838,3934,4001,4067,4170,4281,4478,4790,4793,4843,4893,4928,5292,5293,5300,5306,5451,5518,5594,5600,5601,5657,5686,5693,5702,5711,5713,5724…	ADAR,AKT1,APP,FASLG,ATF1,B2M,CCND1,BCL2,BCL6,CAMK2A,CANX,CAPZA1,CBL,CD40LG,CD44,CDKN1A,CDKN1B,CCR1,COL1A2,CREB1,CRK,CRKL,MAPK14,CSF1R,CSK,EGR1,EIF4A2,FGF2,FOXO1,FOS,RAPGEF1,HIF1A,HLA-E,HMGB1,HRAS,HSPA8,HSPA9,ICAM1,IRF8,IL1B,IL1R1,IL1RAP,IL6,IL6R,IL6ST,IL7,IL7R,IL10,IL10RB,IL15,IRAK1,IRF4,IRF7,ITGB1,ITGB2,KPNA2,LCN2,LMNB1,LYN,MCL1,MID1,MSN,NFKB1,NFKBIB,NOS2,NRAS,NUP98,PIM1,PIK3CD,PIN1,PITPNA,POU2F…
1_Member	Reactome Gene Sets	R-HSA-1280215	Cytokine Signaling in Immune system	-45.9527	-41.591	148/715	103,207,351,356,466,567,595,596,604,815,821,829,867,959,960,1026,1027,1230,1278,1385,1398,1399,1432,1436,1445,1958,1974,2247,2308,2353,2889,3091,3133,3146,3265,3312,3313,3383,3394,3553,3554,3556,3569,3570,3572,3574,3575,3586,3588,3600,3654,3662,3665,3688,3689,3838,3934,4001,4067,4170,4281,4478,4790,4793,4843,4893,4928,5292,5293,5300,5306,5451,5518,5594,5600,5601,5657,5686,5693,5702,5711,5713,5724…	ADAR,AKT1,APP,FASLG,ATF1,B2M,CCND1,BCL2,BCL6,CAMK2A,CANX,CAPZA1,CBL,CD40LG,CD44,CDKN1A,CDKN1B,CCR1,COL1A2,CREB1,CRK,CRKL,MAPK14,CSF1R,CSK,EGR1,EIF4A2,FGF2,FOXO1,FOS,RAPGEF1,HIF1A,HLA-E,HMGB1,HRAS,HSPA8,HSPA9,ICAM1,IRF8,IL1B,IL1R1,IL1RAP,IL6,IL6R,IL6ST,IL7,IL7R,IL10,IL10RB,IL15,IRAK1,IRF4,IRF7,ITGB1,ITGB2,KPNA2,LCN2,LMNB1,LYN,MCL1,MID1,MSN,NFKB1,NFKBIB,NOS2,NRAS,NUP98,PIM1,PIK3CD,PIN1,PITPNA,POU2F…
1_Member	Reactome Gene Sets	R-HSA-449147	Signaling by Interleukins	-38.5256	-35.0089	108/462	207,351,356,466,595,596,604,821,829,867,1026,1230,1278,1385,1398,1399,1432,1436,2247,2308,2353,2889,3091,3146,3312,3313,3383,3553,3554,3556,3569,3570,3572,3574,3575,3586,3588,3600,3654,3662,3688,3689,3934,4001,4067,4170,4478,4790,4793,4843,5292,5293,5306,5451,5518,5594,5600,5601,5657,5686,5693,5702,5711,5713,5724,5775,5777,6095,6233,6352,6356,6416,6464,6616,6648,6773,6774,6775,6810,7040,7157,7184…	AKT1,APP,FASLG,ATF1,CCND1,BCL2,BCL6,CANX,CAPZA1,CBL,CDKN1A,CCR1,COL1A2,CREB1,CRK,CRKL,MAPK14,CSF1R,FGF2,FOXO1,FOS,RAPGEF1,HIF1A,HMGB1,HSPA8,HSPA9,ICAM1,IL1B,IL1R1,IL1RAP,IL6,IL6R,IL6ST,IL7,IL7R,IL10,IL10RB,IL15,IRAK1,IRF4,ITGB1,ITGB2,LCN2,LMNB1,LYN,MCL1,MSN,NFKB1,NFKBIB,NOS2,PIM1,PIK3CD,PITPNA,POU2F1,PPP2R1A,MAPK1,MAPK11,MAPK9,PRTN3,PSMA5,PSMB5,PSMC3,PSMD5,PSMD7,PTAFR,PTPN4,PTPN6,RORA,RPS27A,CCL5…
2_Summary	GO Biological Processes	GO:0097190	apoptotic signaling pathway	-44.093	-40.0323	130/582	91,142,207,355,356,367,472,551,572,578,596,599,648,672,675,754,857,940,960,1026,1032,1191,1280,1396,1613,1616,1654,1869,2081,2771,2810,2872,2907,2931,2956,3091,3092,3148,3265,3304,3383,3479,3553,3570,3574,3624,3655,3685,3708,4170,4193,4292,4683,4804,4976,5027,5054,5074,5170,5326,5366,5499,5578,5601,5728,5740,5925,5979,6498,6648,6688,6788,6789,6810,6934,7001,7040,7098,7128,7157,7185,7417,8065,8398…	ACVR1B,PARP1,AKT1,FAS,FASLG,AR,ATM,AVP,BAD,BAK1,BCL2,BCL2L2,BMI1,BRCA1,BRCA2,PTTG1IP,CAV1,CD28,CD44,CDKN1A,CDKN2D,CLU,COL2A1,CRIP1,DAPK3,DAXX,DDX3X,E2F1,ERN1,GNAI2,SFN,MKNK2,GRINA,GSK3A,MSH6,HIF1A,HIP1,HMGB2,HRAS,HSPA1B,ICAM1,IGF1,IL1B,IL6R,IL7,INHBA,ITGA6,ITGAV,ITPR1,MCL1,MDM2,MLH1,NBN,NGFR,OPA1,P2RX7,SERPINE1,PAWR,PDPK1,PLAGL2,PMAIP1,PPP1CA,PRKCA,MAPK9,PTEN,PTGIS,RB1,RET,SKIL,SOD2,SPI1,STK3,STK…
2_Member	GO Biological Processes	GO:0097190	apoptotic signaling pathway	-44.093	-40.0323	130/582	91,142,207,355,356,367,472,551,572,578,596,599,648,672,675,754,857,940,960,1026,1032,1191,1280,1396,1613,1616,1654,1869,2081,2771,2810,2872,2907,2931,2956,3091,3092,3148,3265,3304,3383,3479,3553,3570,3574,3624,3655,3685,3708,4170,4193,4292,4683,4804,4976,5027,5054,5074,5170,5326,5366,5499,5578,5601,5728,5740,5925,5979,6498,6648,6688,6788,6789,6810,6934,7001,7040,7098,7128,7157,7185,7417,8065,8398…	ACVR1B,PARP1,AKT1,FAS,FASLG,AR,ATM,AVP,BAD,BAK1,BCL2,BCL2L2,BMI1,BRCA1,BRCA2,PTTG1IP,CAV1,CD28,CD44,CDKN1A,CDKN2D,CLU,COL2A1,CRIP1,DAPK3,DAXX,DDX3X,E2F1,ERN1,GNAI2,SFN,MKNK2,GRINA,GSK3A,MSH6,HIF1A,HIP1,HMGB2,HRAS,HSPA1B,ICAM1,IGF1,IL1B,IL6R,IL7,INHBA,ITGA6,ITGAV,ITPR1,MCL1,MDM2,MLH1,NBN,NGFR,OPA1,P2RX7,SERPINE1,PAWR,PDPK1,PLAGL2,PMAIP1,PPP1CA,PRKCA,MAPK9,PTEN,PTGIS,RB1,RET,SKIL,SOD2,SPI1,STK3,STK…
2_Member	GO Biological Processes	GO:0097191	extrinsic apoptotic signaling pathway	-29.7755	-26.919	65/219	91,207,355,356,367,572,578,596,599,672,857,1280,1613,1616,1654,2872,2931,3148,3304,3383,3479,3553,3570,3574,3624,3655,3685,4170,5027,5054,5170,5366,5499,5728,5979,6498,6688,6788,6789,6810,6934,7001,7040,7098,7128,7185,8682,8795,8915,9812,10018,10116,10197,10616,10771,10962,51330,55179,64112,80196,81537,153090,162989,219699,282991	ACVR1B,AKT1,FAS,FASLG,AR,BAD,BAK1,BCL2,BCL2L2,BRCA1,CAV1,COL2A1,DAPK3,DAXX,DDX3X,MKNK2,GSK3A,HMGB2,HSPA1B,ICAM1,IGF1,IL1B,IL6R,IL7,INHBA,ITGA6,ITGAV,MCL1,P2RX7,SERPINE1,PDPK1,PMAIP1,PPP1CA,PTEN,RET,SKIL,SPI1,STK3,STK4,STX4,TCF7L2,PRDX2,TGFB1,TLR3,TNFAIP3,TRAF1,PEA15,TNFRSF10B,BCL10,DELE1,BCL2L11,FEM1B,PSME3,RBCK1,ZMYND11,MLLT11,TNFRSF12A,FAIM,MOAP1,RNF34,SGPP1,DAB2IP,DEDD2,UNC5B,BLOC1S2
2_Member	GO Biological Processes	GO:2001233	regulation of apoptotic signaling pathway	-23.1247	-20.638	74/356	142,207,355,367,551,572,596,599,648,672,754,857,960,1032,1191,1280,1613,1654,2771,2907,3091,3148,3304,3383,3479,3553,3574,3624,3655,3685,4170,4193,4804,4976,5054,5326,5366,5499,5601,5728,5925,5979,6498,6648,6788,6789,6810,6934,7001,7128,7157,7185,7417,8682,8915,9451,9529,10018,10105,10116,10197,10616,10771,23411,29979,51330,51588,51616,55179,80196,153090,162989,219699,259230	PARP1,AKT1,FAS,AR,AVP,BAD,BCL2,BCL2L2,BMI1,BRCA1,PTTG1IP,CAV1,CD44,CDKN2D,CLU,COL2A1,DAPK3,DDX3X,GNAI2,GRINA,HIF1A,HMGB2,HSPA1B,ICAM1,IGF1,IL1B,IL7,INHBA,ITGA6,ITGAV,MCL1,MDM2,NGFR,OPA1,SERPINE1,PLAGL2,PMAIP1,PPP1CA,MAPK9,PTEN,RB1,RET,SKIL,SOD2,STK3,STK4,STX4,TCF7L2,PRDX2,TNFAIP3,TP53,TRAF1,VDAC2,PEA15,BCL10,EIF2AK3,BAG5,BCL2L11,PPIF,FEM1B,PSME3,RBCK1,ZMYND11,SIRT1,UBQLN1,TNFRSF12A,PIAS4,TAF9B,FA…
2_Member	GO Biological Processes	GO:2001236	regulation of extrinsic apoptotic signaling pathway	-18.2864	-16.1775	42/151	207,367,596,672,857,1280,1613,1654,3148,3304,3383,3479,3553,3574,3624,3655,3685,4170,5054,5366,5499,5728,5979,6498,6788,6789,6810,6934,7001,7128,7185,8682,8915,10116,10197,10616,10771,51330,55179,80196,162989,219699	AKT1,AR,BCL2,BRCA1,CAV1,COL2A1,DAPK3,DDX3X,HMGB2,HSPA1B,ICAM1,IGF1,IL1B,IL7,INHBA,ITGA6,ITGAV,MCL1,SERPINE1,PMAIP1,PPP1CA,PTEN,RET,SKIL,STK3,STK4,STX4,TCF7L2,PRDX2,TNFAIP3,TRAF1,PEA15,BCL10,FEM1B,PSME3,RBCK1,ZMYND11,TNFRSF12A,FAIM,RNF34,DEDD2,UNC5B
2_Member	GO Biological Processes	GO:0008625	extrinsic apoptotic signaling pathway via death domain receptors	-14.0013	-12.1825	27/82	356,572,596,672,1616,1654,3148,3383,5054,5366,5728,6498,6688,6788,6789,6810,7128,8682,8795,9812,10116,55179,64112,80196,153090,162989,282991	FASLG,BAD,BCL2,BRCA1,DAXX,DDX3X,HMGB2,ICAM1,SERPINE1,PMAIP1,PTEN,SKIL,SPI1,STK3,STK4,STX4,TNFAIP3,PEA15,TNFRSF10B,DELE1,FEM1B,FAIM,MOAP1,RNF34,DAB2IP,DEDD2,BLOC1S2
2_Member	GO Biological Processes	GO:2001234	negative regulation of apoptotic signaling pathway	-13.0821	-11.3331	44/224	207,367,551,596,599,648,672,754,960,1032,1191,1280,1654,2771,2907,3091,3148,3304,3383,3479,3553,3574,3655,3685,4170,4193,4976,5054,5925,6648,6934,7001,7128,7417,8682,9529,10105,10197,10771,23411,51616,55179,80196,219699	AKT1,AR,AVP,BCL2,BCL2L2,BMI1,BRCA1,PTTG1IP,CD44,CDKN2D,CLU,COL2A1,DDX3X,GNAI2,GRINA,HIF1A,HMGB2,HSPA1B,ICAM1,IGF1,IL1B,IL7,ITGA6,ITGAV,MCL1,MDM2,OPA1,SERPINE1,RB1,SOD2,TCF7L2,PRDX2,TNFAIP3,VDAC2,PEA15,BAG5,PPIF,PSME3,ZMYND11,SIRT1,TAF9B,FAIM,RNF34,UNC5B
2_Member	GO Biological Processes	GO:2001237	negative regulation of extrinsic apoptotic signaling pathway	-10.3711	-8.83089	25/97	207,367,596,672,1280,1654,3148,3304,3383,3479,3553,3574,3655,3685,4170,5054,6934,7001,7128,8682,10197,10771,55179,80196,219699	AKT1,AR,BCL2,BRCA1,COL2A1,DDX3X,HMGB2,HSPA1B,ICAM1,IGF1,IL1B,IL7,ITGA6,ITGAV,MCL1,SERPINE1,TCF7L2,PRDX2,TNFAIP3,PEA15,PSME3,ZMYND11,FAIM,RNF34,UNC5B
2_Member	GO Biological Processes	GO:1902041	regulation of extrinsic apoptotic signaling pathway via death domain receptors	-8.50551	-7.12607	16/49	672,1654,3148,3383,5054,5366,5728,6498,6788,6789,6810,7128,8682,10116,55179,80196	BRCA1,DDX3X,HMGB2,ICAM1,SERPINE1,PMAIP1,PTEN,SKIL,STK3,STK4,STX4,TNFAIP3,PEA15,FEM1B,FAIM,RNF34
3_Summary	KEGG Pathway	hsa05200	Pathways in cancer	-42.1379	-38.2534	104/395	111,113,207,324,331,355,356,367,572,595,596,650,675,861,862,867,898,1019,1026,1027,1029,1398,1399,1436,1487,1488,1613,1855,1869,1871,2149,2247,2252,2308,2353,2768,2771,2776,2782,2956,3091,3265,3479,3480,3569,3655,3673,3675,3685,3688,3913,4087,4089,4193,4292,4437,4790,4843,4893,4914,5155,5159,5293,5336,5468,5567,5578,5579,5594,5601,5728,5734,5880,5881,5915,5925,5979,6608,6688,6774,6789,6932,6934,7…	ADCY5,ADCY7,AKT1,APC,XIAP,FAS,FASLG,AR,BAD,CCND1,BCL2,BMP2,BRCA2,RUNX1,RUNX1T1,CBL,CCNE1,CDK4,CDKN1A,CDKN1B,CDKN2A,CRK,CRKL,CSF1R,CTBP1,CTBP2,DAPK3,DVL1,E2F1,E2F3,F2R,FGF2,FGF7,FOXO1,FOS,GNA12,GNAI2,GNAQ,GNB1,MSH6,HIF1A,HRAS,IGF1,IGF1R,IL6,ITGA6,ITGA2,ITGA3,ITGAV,ITGB1,LAMB2,SMAD2,SMAD4,MDM2,MLH1,MSH3,NFKB1,NOS2,NRAS,NTRK1,PDGFB,PDGFRB,PIK3CD,PLCG2,PPARG,PRKACB,PRKCA,PRKCB,MAPK1,MAPK9,PTEN,PTGER4…
3_Member	KEGG Pathway	hsa05200	Pathways in cancer	-42.1379	-38.2534	104/395	111,113,207,324,331,355,356,367,572,595,596,650,675,861,862,867,898,1019,1026,1027,1029,1398,1399,1436,1487,1488,1613,1855,1869,1871,2149,2247,2252,2308,2353,2768,2771,2776,2782,2956,3091,3265,3479,3480,3569,3655,3673,3675,3685,3688,3913,4087,4089,4193,4292,4437,4790,4843,4893,4914,5155,5159,5293,5336,5468,5567,5578,5579,5594,5601,5728,5734,5880,5881,5915,5925,5979,6608,6688,6774,6789,6932,6934,7…	ADCY5,ADCY7,AKT1,APC,XIAP,FAS,FASLG,AR,BAD,CCND1,BCL2,BMP2,BRCA2,RUNX1,RUNX1T1,CBL,CCNE1,CDK4,CDKN1A,CDKN1B,CDKN2A,CRK,CRKL,CSF1R,CTBP1,CTBP2,DAPK3,DVL1,E2F1,E2F3,F2R,FGF2,FGF7,FOXO1,FOS,GNA12,GNAI2,GNAQ,GNB1,MSH6,HIF1A,HRAS,IGF1,IGF1R,IL6,ITGA6,ITGA2,ITGA3,ITGAV,ITGB1,LAMB2,SMAD2,SMAD4,MDM2,MLH1,MSH3,NFKB1,NOS2,NRAS,NTRK1,PDGFB,PDGFRB,PIK3CD,PLCG2,PPARG,PRKACB,PRKCA,PRKCB,MAPK1,MAPK9,PTEN,PTGER4…
3_Member	KEGG Pathway	ko04151	PI3K-Akt signaling pathway	-20.1682	-17.9336	68/342	207,356,572,595,596,672,894,898,1019,1026,1027,1278,1280,1385,1436,1978,2149,2247,2252,2782,3265,3479,3480,3569,3570,3574,3575,3655,3673,3675,3685,3688,3690,3696,3913,4170,4193,4602,4790,4804,4893,5155,5159,5170,5293,5518,5563,5578,5594,5728,6198,6199,7157,7184,7248,7249,7422,7531,7533,7534,8074,9180,10018,23035,23678,54541,117145,118788	AKT1,FASLG,BAD,CCND1,BCL2,BRCA1,CCND2,CCNE1,CDK4,CDKN1A,CDKN1B,COL1A2,COL2A1,CREB1,CSF1R,EIF4EBP1,F2R,FGF2,FGF7,GNB1,HRAS,IGF1,IGF1R,IL6,IL6R,IL7,IL7R,ITGA6,ITGA2,ITGA3,ITGAV,ITGB1,ITGB3,ITGB8,LAMB2,MCL1,MDM2,MYB,NFKB1,NGFR,NRAS,PDGFB,PDGFRB,PDPK1,PIK3CD,PPP2R1A,PRKAA2,PRKCA,MAPK1,PTEN,RPS6KB1,RPS6KB2,TP53,HSP90B1,TSC1,TSC2,VEGFA,YWHAE,YWHAH,YWHAZ,FGF23,OSMR,BCL2L11,PHLPP2,SGK3,DDIT4,THEM4,PIK3AP1
3_Member	KEGG Pathway	hsa04151	PI3K-Akt signaling pathway	-20.0594	-17.828	72/380	207,356,572,595,596,672,894,898,1019,1026,1027,1278,1280,1385,1436,1978,2069,2149,2247,2252,2782,3265,3479,3480,3481,3569,3570,3574,3575,3655,3673,3675,3685,3688,3690,3696,3913,4170,4193,4602,4790,4804,4893,4914,5155,5159,5170,5293,5518,5563,5578,5594,5728,6198,6199,7157,7184,7248,7249,7422,7531,7533,7534,8074,9180,10018,22883,23035,23678,54541,117145,118788	AKT1,FASLG,BAD,CCND1,BCL2,BRCA1,CCND2,CCNE1,CDK4,CDKN1A,CDKN1B,COL1A2,COL2A1,CREB1,CSF1R,EIF4EBP1,EREG,F2R,FGF2,FGF7,GNB1,HRAS,IGF1,IGF1R,IGF2,IL6,IL6R,IL7,IL7R,ITGA6,ITGA2,ITGA3,ITGAV,ITGB1,ITGB3,ITGB8,LAMB2,MCL1,MDM2,MYB,NFKB1,NGFR,NRAS,NTRK1,PDGFB,PDGFRB,PDPK1,PIK3CD,PPP2R1A,PRKAA2,PRKCA,MAPK1,PTEN,RPS6KB1,RPS6KB2,TP53,HSP90B1,TSC1,TSC2,VEGFA,YWHAE,YWHAH,YWHAZ,FGF23,OSMR,BCL2L11,CLSTN1,PHLPP2,…
3_Member	WikiPathways	WP4172	PI3K-Akt signaling pathway	-19.3024	-17.1254	67/345	207,356,572,595,596,672,894,898,1019,1026,1027,1278,1280,1385,1436,1978,2149,2247,2252,2782,3265,3479,3480,3481,3569,3570,3574,3575,3655,3673,3675,3685,3688,3690,3696,3913,4170,4193,4602,4790,4804,4893,4914,5155,5159,5170,5293,5518,5563,5578,5594,5728,6198,6199,7157,7184,7248,7249,7422,8074,9180,10018,23035,23678,54541,117145,118788	AKT1,FASLG,BAD,CCND1,BCL2,BRCA1,CCND2,CCNE1,CDK4,CDKN1A,CDKN1B,COL1A2,COL2A1,CREB1,CSF1R,EIF4EBP1,F2R,FGF2,FGF7,GNB1,HRAS,IGF1,IGF1R,IGF2,IL6,IL6R,IL7,IL7R,ITGA6,ITGA2,ITGA3,ITGAV,ITGB1,ITGB3,ITGB8,LAMB2,MCL1,MDM2,MYB,NFKB1,NGFR,NRAS,NTRK1,PDGFB,PDGFRB,PDPK1,PIK3CD,PPP2R1A,PRKAA2,PRKCA,MAPK1,PTEN,RPS6KB1,RPS6KB2,TP53,HSP90B1,TSC1,TSC2,VEGFA,FGF23,OSMR,BCL2L11,PHLPP2,SGK3,DDIT4,THEM4,PIK3AP1
3_Member	WikiPathways	WP3932	Focal adhesion: PI3K-Akt-mTOR-signaling pathway	-15.4593	-13.54	57/309	207,572,1026,1027,1278,1280,1385,1436,1978,2149,2247,2252,2308,2782,3091,3169,3265,3479,3480,3570,3575,3655,3673,3675,3685,3688,3689,3690,3696,3913,4193,4804,4843,4893,5155,5159,5170,5208,5293,5518,5563,5594,5728,6198,6199,6515,7184,7248,7249,7422,8408,9180,10891,23035,30849,51719,54541	AKT1,BAD,CDKN1A,CDKN1B,COL1A2,COL2A1,CREB1,CSF1R,EIF4EBP1,F2R,FGF2,FGF7,FOXO1,GNB1,HIF1A,FOXA1,HRAS,IGF1,IGF1R,IL6R,IL7R,ITGA6,ITGA2,ITGA3,ITGAV,ITGB1,ITGB2,ITGB3,ITGB8,LAMB2,MDM2,NGFR,NOS2,NRAS,PDGFB,PDGFRB,PDPK1,PFKFB2,PIK3CD,PPP2R1A,PRKAA2,MAPK1,PTEN,RPS6KB1,RPS6KB2,SLC2A3,HSP90B1,TSC1,TSC2,VEGFA,ULK1,OSMR,PPARGC1A,PHLPP2,PIK3R4,CAB39,DDIT4
4_Summary	GO Biological Processes	GO:0046649	lymphocyte activation	-41.7942	-38.0345	148/771	207,326,472,538,558,567,572,578,596,604,648,814,857,861,864,915,923,924,940,959,960,961,975,1026,1141,1235,1316,1445,1604,1650,1880,1958,2067,2150,2280,2529,2796,2956,3133,3146,3383,3394,3398,3479,3481,3516,3553,3569,3570,3572,3574,3575,3586,3600,3615,3624,3662,3688,3702,3955,4064,4067,4092,4189,4292,4478,4602,4627,4683,4853,4860,4914,5074,5293,5316,5336,5573,5579,5621,5734,5777,5795,5813,5873,58…	AKT1,AIRE,ATM,ATP7A,AXL,B2M,BAD,BAK1,BCL2,BCL6,BMI1,CAMK4,CAV1,RUNX1,RUNX3,CD3D,CD6,CD7,CD28,CD40LG,CD44,CD47,CD81,CDKN1A,CHRNB2,CCR6,KLF6,CSK,CD55,DDOST,GPR183,EGR1,ERCC1,F2RL1,FKBP1A,FUT7,GNRH1,MSH6,HLA-E,HMGB1,ICAM1,IRF8,ID2,IGF1,IGF2,RBPJ,IL1B,IL6,IL6R,IL6ST,IL7,IL7R,IL10,IL15,IMPDH2,INHBA,IRF4,ITGB1,ITK,LFNG,CD180,LYN,SMAD7,DNAJB9,MLH1,MSN,MYB,MYH9,NBN,NOTCH2,PNP,NTRK1,PAWR,PIK3CD,PKNOX1,PLC…
4_Member	GO Biological Processes	GO:0046649	lymphocyte activation	-41.7942	-38.0345	148/771	207,326,472,538,558,567,572,578,596,604,648,814,857,861,864,915,923,924,940,959,960,961,975,1026,1141,1235,1316,1445,1604,1650,1880,1958,2067,2150,2280,2529,2796,2956,3133,3146,3383,3394,3398,3479,3481,3516,3553,3569,3570,3572,3574,3575,3586,3600,3615,3624,3662,3688,3702,3955,4064,4067,4092,4189,4292,4478,4602,4627,4683,4853,4860,4914,5074,5293,5316,5336,5573,5579,5621,5734,5777,5795,5813,5873,58…	AKT1,AIRE,ATM,ATP7A,AXL,B2M,BAD,BAK1,BCL2,BCL6,BMI1,CAMK4,CAV1,RUNX1,RUNX3,CD3D,CD6,CD7,CD28,CD40LG,CD44,CD47,CD81,CDKN1A,CHRNB2,CCR6,KLF6,CSK,CD55,DDOST,GPR183,EGR1,ERCC1,F2RL1,FKBP1A,FUT7,GNRH1,MSH6,HLA-E,HMGB1,ICAM1,IRF8,ID2,IGF1,IGF2,RBPJ,IL1B,IL6,IL6R,IL6ST,IL7,IL7R,IL10,IL15,IMPDH2,INHBA,IRF4,ITGB1,ITK,LFNG,CD180,LYN,SMAD7,DNAJB9,MLH1,MSN,MYB,MYH9,NBN,NOTCH2,PNP,NTRK1,PAWR,PIK3CD,PKNOX1,PLC…
4_Member	GO Biological Processes	GO:0030155	regulation of cell adhesion	-41.2405	-37.5777	145/751	81,102,182,207,396,472,566,567,572,596,604,648,650,811,857,861,864,923,940,959,960,961,975,1012,1029,1295,1398,1399,1432,1445,1604,1613,1843,1991,2523,2525,2529,2796,3037,3133,3146,3169,3383,3479,3481,3553,3569,3572,3574,3575,3586,3600,3611,3654,3655,3673,3675,3685,3689,3987,4067,4092,4221,4602,4771,4811,4851,4860,5054,5074,5155,5310,5328,5420,5500,5518,5573,5578,5621,5724,5728,5777,5795,5880,588…	ACTN4,ADAM10,JAG1,AKT1,ARHGDIA,ATM,AZU1,B2M,BAD,BCL2,BCL6,BMI1,BMP2,CALR,CAV1,RUNX1,RUNX3,CD6,CD28,CD40LG,CD44,CD47,CD81,CDH13,CDKN2A,COL8A1,CRK,CRKL,MAPK14,CSK,CD55,DAPK3,DUSP1,ELANE,FUT1,FUT3,FUT7,GNRH1,HAS2,HLA-E,HMGB1,FOXA1,ICAM1,IGF1,IGF2,IL1B,IL6,IL6ST,IL7,IL7R,IL10,IL15,ILK,IRAK1,ITGA6,ITGA2,ITGA3,ITGAV,ITGB2,LIMS1,LYN,SMAD7,MEN1,MYB,NF2,NID1,NOTCH1,PNP,SERPINE1,PAWR,PDGFB,PKD1,PLAU,PODXL,…
4_Member	GO Biological Processes	GO:0042110	T cell activation	-32.2772	-29.1715	102/484	207,326,538,567,572,596,604,648,814,857,861,864,915,923,924,940,959,960,961,975,1235,1445,1604,1650,1880,1958,2150,2280,2529,2796,3133,3146,3383,3479,3481,3553,3569,3570,3572,3574,3575,3586,3600,3662,3702,3955,4067,4092,4478,4602,4627,4860,5074,5293,5316,5573,5621,5734,5777,5873,5880,6095,6352,6556,6659,6688,6722,6774,6932,7001,7037,7048,7157,7248,7293,7525,8915,9231,9308,9655,10673,10758,11126,1…	AKT1,AIRE,ATP7A,B2M,BAD,BCL2,BCL6,BMI1,CAMK4,CAV1,RUNX1,RUNX3,CD3D,CD6,CD7,CD28,CD40LG,CD44,CD47,CD81,CCR6,CSK,CD55,DDOST,GPR183,EGR1,F2RL1,FKBP1A,FUT7,GNRH1,HLA-E,HMGB1,ICAM1,IGF1,IGF2,IL1B,IL6,IL6R,IL6ST,IL7,IL7R,IL10,IL15,IRF4,ITK,LFNG,LYN,SMAD7,MSN,MYB,MYH9,PNP,PAWR,PIK3CD,PKNOX1,PRKAR1A,PRNP,PTGER4,PTPN6,RAB27A,RAC2,RORA,CCL5,SLC11A1,SOX4,SPI1,SRF,STAT3,TCF7,PRDX2,TFRC,TGFBR2,TP53,TSC1,TNFRS…
4_Member	GO Biological Processes	GO:0045785	positive regulation of cell adhesion	-31.2005	-28.3012	95/437	207,472,566,567,572,604,648,811,857,861,864,923,940,959,960,961,975,1012,1295,1398,1399,1445,1604,1991,2523,2525,2529,3037,3133,3146,3169,3383,3479,3481,3553,3569,3572,3574,3575,3586,3600,3611,3654,3655,3673,3675,3685,3689,3987,4067,4092,4602,4811,4860,5155,5420,5578,5724,5777,5795,5881,5979,6239,6352,6659,6789,6810,7037,7048,7248,7422,7525,8728,8784,8826,8915,9308,9655,9806,10673,10725,11126,112…	AKT1,ATM,AZU1,B2M,BAD,BCL6,BMI1,CALR,CAV1,RUNX1,RUNX3,CD6,CD28,CD40LG,CD44,CD47,CD81,CDH13,COL8A1,CRK,CRKL,CSK,CD55,ELANE,FUT1,FUT3,FUT7,HAS2,HLA-E,HMGB1,FOXA1,ICAM1,IGF1,IGF2,IL1B,IL6,IL6ST,IL7,IL7R,IL10,IL15,ILK,IRAK1,ITGA6,ITGA2,ITGA3,ITGAV,ITGB2,LIMS1,LYN,SMAD7,MYB,NID1,PNP,PDGFB,PODXL,PRKCA,PTAFR,PTPN6,PTPRJ,RAC3,RET,RREB1,CCL5,SOX4,STK4,STX4,TFRC,TGFBR2,TSC1,VEGFA,YES1,ADAM19,TNFRSF18,IQGAP…
4_Member	GO Biological Processes	GO:0022407	regulation of cell-cell adhesion	-26.7405	-24.0222	90/450	182,207,567,572,604,648,650,857,861,864,923,940,959,960,961,975,1432,1445,1604,1991,2525,2529,2796,3037,3133,3146,3169,3383,3479,3481,3553,3569,3572,3574,3575,3586,3600,3654,3689,4067,4092,4602,4771,4851,4860,5074,5420,5573,5578,5621,5724,5777,6352,6659,6688,7001,7037,7040,7048,7422,7525,8728,8915,9231,9308,9370,9655,10019,10673,10725,11126,11221,23308,27242,50488,50848,53827,54900,57162,64127,64…	JAG1,AKT1,B2M,BAD,BCL6,BMI1,BMP2,CAV1,RUNX1,RUNX3,CD6,CD28,CD40LG,CD44,CD47,CD81,MAPK14,CSK,CD55,ELANE,FUT3,FUT7,GNRH1,HAS2,HLA-E,HMGB1,FOXA1,ICAM1,IGF1,IGF2,IL1B,IL6,IL6ST,IL7,IL7R,IL10,IL15,IRAK1,ITGB2,LYN,SMAD7,MYB,NF2,NOTCH1,PNP,PAWR,PODXL,PRKAR1A,PRKCA,PRNP,PTAFR,PTPN6,CCL5,SOX4,SPI1,PRDX2,TFRC,TGFB1,TGFBR2,VEGFA,YES1,ADAM19,BCL10,DLG5,CD83,ADIPOQ,SOCS5,SH2B3,TNFSF13B,NFAT5,CD160,DUSP10,ICOS…
4_Member	GO Biological Processes	GO:0007159	leukocyte cell-cell adhesion	-25.3762	-22.7468	79/371	207,567,572,604,648,857,861,864,923,940,959,960,961,975,1445,1604,1991,2529,2796,3037,3133,3146,3383,3479,3481,3553,3569,3572,3574,3575,3586,3600,3654,3688,3689,4067,4092,4478,4602,4860,4973,5074,5573,5621,5724,5777,5880,6352,6659,7001,7037,7048,7525,8915,9231,9308,9655,10507,10673,10725,11126,11221,23308,27242,50848,51148,54900,57162,64116,64127,64332,65125,79576,81704,115650,140885,375056,40693…	AKT1,B2M,BAD,BCL6,BMI1,CAV1,RUNX1,RUNX3,CD6,CD28,CD40LG,CD44,CD47,CD81,CSK,CD55,ELANE,FUT7,GNRH1,HAS2,HLA-E,HMGB1,ICAM1,IGF1,IGF2,IL1B,IL6,IL6ST,IL7,IL7R,IL10,IL15,IRAK1,ITGB1,ITGB2,LYN,SMAD7,MSN,MYB,PNP,OLR1,PAWR,PRKAR1A,PRNP,PTAFR,PTPN6,RAC2,CCL5,SOX4,PRDX2,TFRC,TGFBR2,YES1,BCL10,DLG5,CD83,SOCS5,SEMA4D,TNFSF13B,NFAT5,CD160,DUSP10,ICOSLG,TNFRSF21,F11R,CERCAM,LAX1,PELI1,SLC39A8,NOD2,NFKBIZ,WNK1,N…
4_Member	GO Biological Processes	GO:0050865	regulation of cell activation	-24.9482	-22.3441	108/650	207,472,558,567,572,596,604,648,814,857,861,864,923,940,959,961,975,1026,1141,1445,1604,1880,2150,2796,3133,3146,3398,3479,3481,3553,3569,3572,3574,3575,3586,3600,3624,3662,3689,3735,3949,4067,4092,4292,4602,4860,5074,5155,5159,5170,5573,5578,5621,5724,5777,5880,6095,6352,6659,6688,6810,6932,7001,7037,7040,7048,7056,7128,7293,7294,7301,7525,8723,8741,8915,9231,9308,9655,9846,10019,10666,10673,110…	AKT1,ATM,AXL,B2M,BAD,BCL2,BCL6,BMI1,CAMK4,CAV1,RUNX1,RUNX3,CD6,CD28,CD40LG,CD47,CD81,CDKN1A,CHRNB2,CSK,CD55,GPR183,F2RL1,GNRH1,HLA-E,HMGB1,ID2,IGF1,IGF2,IL1B,IL6,IL6ST,IL7,IL7R,IL10,IL15,INHBA,IRF4,ITGB2,KARS1,LDLR,LYN,SMAD7,MLH1,MYB,PNP,PAWR,PDGFB,PDGFRB,PDPK1,PRKAR1A,PRKCA,PRNP,PTAFR,PTPN6,RAC2,RORA,CCL5,SOX4,SPI1,STX4,TCF7,PRDX2,TFRC,TGFB1,TGFBR2,THBD,TNFAIP3,TNFRSF4,TXK,TYRO3,YES1,SNX4,TNFSF1…
4_Member	GO Biological Processes	GO:0002694	regulation of leukocyte activation	-22.8846	-20.4037	100/606	207,472,558,567,572,596,604,648,814,857,861,864,923,940,959,961,975,1026,1141,1445,1604,1880,2150,2796,3133,3146,3398,3479,3481,3553,3569,3572,3574,3575,3586,3600,3624,3662,3689,3735,3949,4067,4092,4292,4602,4860,5074,5170,5573,5621,5724,5777,5880,6095,6352,6659,6688,6810,6932,7001,7037,7040,7048,7128,7293,7301,7525,8723,8741,8915,9231,9308,9655,9846,10666,10673,11126,11221,22806,23308,23529,2724…	AKT1,ATM,AXL,B2M,BAD,BCL2,BCL6,BMI1,CAMK4,CAV1,RUNX1,RUNX3,CD6,CD28,CD40LG,CD47,CD81,CDKN1A,CHRNB2,CSK,CD55,GPR183,F2RL1,GNRH1,HLA-E,HMGB1,ID2,IGF1,IGF2,IL1B,IL6,IL6ST,IL7,IL7R,IL10,IL15,INHBA,IRF4,ITGB2,KARS1,LDLR,LYN,SMAD7,MLH1,MYB,PNP,PAWR,PDPK1,PRKAR1A,PRNP,PTAFR,PTPN6,RAC2,RORA,CCL5,SOX4,SPI1,STX4,TCF7,PRDX2,TFRC,TGFB1,TGFBR2,TNFAIP3,TNFRSF4,TYRO3,YES1,SNX4,TNFSF13,BCL10,DLG5,CD83,SOCS5,GAB2…
4_Member	GO Biological Processes	GO:1903037	regulation of leukocyte cell-cell adhesion	-22.6479	-20.1893	71/336	207,567,572,604,648,857,861,864,923,940,959,960,961,975,1445,1604,1991,2529,2796,3037,3133,3146,3383,3479,3481,3553,3569,3572,3574,3575,3586,3600,3654,3689,4067,4092,4602,4860,5074,5573,5621,5724,5777,6352,6659,7001,7037,7048,7525,8915,9231,9308,9655,10673,10725,11126,11221,23308,27242,54900,57162,64127,64332,65125,79576,81704,115650,140885,375056,406933,729230	AKT1,B2M,BAD,BCL6,BMI1,CAV1,RUNX1,RUNX3,CD6,CD28,CD40LG,CD44,CD47,CD81,CSK,CD55,ELANE,FUT7,GNRH1,HAS2,HLA-E,HMGB1,ICAM1,IGF1,IGF2,IL1B,IL6,IL6ST,IL7,IL7R,IL10,IL15,IRAK1,ITGB2,LYN,SMAD7,MYB,PNP,PAWR,PRKAR1A,PRNP,PTAFR,PTPN6,CCL5,SOX4,PRDX2,TFRC,TGFBR2,YES1,BCL10,DLG5,CD83,SOCS5,TNFSF13B,NFAT5,CD160,DUSP10,ICOSLG,TNFRSF21,LAX1,PELI1,NOD2,NFKBIZ,WNK1,NKAP,DOCK8,TNFRSF13C,SIRPA,MIA3,MIR141,CCR2
4_Member	GO Biological Processes	GO:0022409	positive regulation of cell-cell adhesion	-22.0499	-19.6327	64/284	207,567,572,604,648,857,861,864,923,940,959,960,961,975,1445,1604,1991,2525,2529,3037,3133,3146,3169,3383,3479,3481,3553,3569,3572,3574,3575,3586,3600,3654,3689,4067,4092,4602,4860,5420,5724,5777,6352,6659,7037,7048,7525,8728,8915,9308,9655,10673,10725,11126,11221,23308,50848,64127,64332,79576,81704,115650,140885,729230	AKT1,B2M,BAD,BCL6,BMI1,CAV1,RUNX1,RUNX3,CD6,CD28,CD40LG,CD44,CD47,CD81,CSK,CD55,ELANE,FUT3,FUT7,HAS2,HLA-E,HMGB1,FOXA1,ICAM1,IGF1,IGF2,IL1B,IL6,IL6ST,IL7,IL7R,IL10,IL15,IRAK1,ITGB2,LYN,SMAD7,MYB,PNP,PODXL,PTAFR,PTPN6,CCL5,SOX4,TFRC,TGFBR2,YES1,ADAM19,BCL10,CD83,SOCS5,TNFSF13B,NFAT5,CD160,DUSP10,ICOSLG,F11R,NOD2,NFKBIZ,NKAP,DOCK8,TNFRSF13C,SIRPA,CCR2
4_Member	GO Biological Processes	GO:0042113	B cell activation	-21.4374	-19.0885	69/334	472,572,578,596,604,648,940,959,975,1026,1141,1235,1316,1880,2067,2956,3394,3398,3516,3569,3574,3575,3586,3624,3688,3955,4064,4067,4189,4292,4683,4853,4914,5074,5293,5336,5579,5777,5795,6688,7037,7040,7128,7157,7293,7374,7528,8741,8935,10673,10758,11331,22806,23308,23529,27242,28526,51237,51341,54106,54900,57162,64127,114609,115650,150372,200081,359948,374403	ATM,BAD,BAK1,BCL2,BCL6,BMI1,CD28,CD40LG,CD81,CDKN1A,CHRNB2,CCR6,KLF6,GPR183,ERCC1,MSH6,IRF8,ID2,RBPJ,IL6,IL7,IL7R,IL10,INHBA,ITGB1,LFNG,CD180,LYN,DNAJB9,MLH1,NBN,NOTCH2,NTRK1,PAWR,PIK3CD,PLCG2,PRKCB,PTPN6,PTPRJ,SPI1,TFRC,TGFB1,TNFAIP3,TP53,TNFRSF4,UNG,YY1,TNFSF13,SKAP2,TNFSF13B,TRAF3IP2,PHB2,IKZF3,ICOSLG,CLCF1,TNFRSF21,TRDC,MZB1,ZBTB7A,TLR9,LAX1,PELI1,NOD2,TIRAP,TNFRSF13C,NFAM1,TXLNA,IRF2BP2,TBC1…
4_Member	GO Biological Processes	GO:0051249	regulation of lymphocyte activation	-21.2204	-18.8799	88/515	207,472,558,567,572,596,604,648,814,857,861,864,923,940,959,961,975,1026,1141,1445,1604,1880,2796,3133,3146,3398,3479,3481,3553,3569,3572,3574,3575,3586,3600,3624,3662,4067,4092,4292,4602,4860,5074,5573,5621,5777,5880,6352,6659,6932,7001,7037,7040,7048,7128,7293,7301,7525,8741,8915,9231,9308,9655,10673,11126,11221,22806,23308,23529,27240,27242,28526,51237,54106,54900,57162,64127,64332,79576,81704…	AKT1,ATM,AXL,B2M,BAD,BCL2,BCL6,BMI1,CAMK4,CAV1,RUNX1,RUNX3,CD6,CD28,CD40LG,CD47,CD81,CDKN1A,CHRNB2,CSK,CD55,GPR183,GNRH1,HLA-E,HMGB1,ID2,IGF1,IGF2,IL1B,IL6,IL6ST,IL7,IL7R,IL10,IL15,INHBA,IRF4,LYN,SMAD7,MLH1,MYB,PNP,PAWR,PRKAR1A,PRNP,PTPN6,RAC2,CCL5,SOX4,TCF7,PRDX2,TFRC,TGFB1,TGFBR2,TNFAIP3,TNFRSF4,TYRO3,YES1,TNFSF13,BCL10,DLG5,CD83,SOCS5,TNFSF13B,CD160,DUSP10,IKZF3,ICOSLG,CLCF1,SIT1,TNFRSF21,TRDC…
4_Member	GO Biological Processes	GO:1903039	positive regulation of leukocyte cell-cell adhesion	-20.976	-18.6596	57/239	207,567,572,604,648,857,861,864,923,940,959,960,961,975,1445,1604,1991,2529,3037,3133,3146,3383,3479,3481,3553,3569,3572,3574,3575,3600,3654,3689,4067,4602,4860,5724,5777,6352,6659,7037,7048,7525,8915,9308,9655,10673,10725,11126,11221,23308,64127,64332,79576,81704,115650,140885,729230	AKT1,B2M,BAD,BCL6,BMI1,CAV1,RUNX1,RUNX3,CD6,CD28,CD40LG,CD44,CD47,CD81,CSK,CD55,ELANE,FUT7,HAS2,HLA-E,HMGB1,ICAM1,IGF1,IGF2,IL1B,IL6,IL6ST,IL7,IL7R,IL15,IRAK1,ITGB2,LYN,MYB,PNP,PTAFR,PTPN6,CCL5,SOX4,TFRC,TGFBR2,YES1,BCL10,CD83,SOCS5,TNFSF13B,NFAT5,CD160,DUSP10,ICOSLG,NOD2,NFKBIZ,NKAP,DOCK8,TNFRSF13C,SIRPA,CCR2
4_Member	GO Biological Processes	GO:0050863	regulation of T cell activation	-19.0792	-16.9216	65/330	207,567,572,604,648,814,857,861,864,923,940,959,961,975,1445,1604,2796,3133,3146,3479,3481,3553,3569,3572,3574,3575,3586,3600,3662,4067,4092,4602,4860,5074,5573,5621,5777,5880,6352,6659,6932,7001,7037,7048,7525,8915,9231,9308,9655,10673,11126,11221,23308,27240,27242,54900,57162,64127,64332,79576,81704,115004,115650,140885,729230	AKT1,B2M,BAD,BCL6,BMI1,CAMK4,CAV1,RUNX1,RUNX3,CD6,CD28,CD40LG,CD47,CD81,CSK,CD55,GNRH1,HLA-E,HMGB1,IGF1,IGF2,IL1B,IL6,IL6ST,IL7,IL7R,IL10,IL15,IRF4,LYN,SMAD7,MYB,PNP,PAWR,PRKAR1A,PRNP,PTPN6,RAC2,CCL5,SOX4,TCF7,PRDX2,TFRC,TGFBR2,YES1,BCL10,DLG5,CD83,SOCS5,TNFSF13B,CD160,DUSP10,ICOSLG,SIT1,TNFRSF21,LAX1,PELI1,NOD2,NFKBIZ,NKAP,DOCK8,CGAS,TNFRSF13C,SIRPA,CCR2
4_Member	GO Biological Processes	GO:0050867	positive regulation of cell activation	-18.7007	-16.5694	74/420	207,558,567,572,596,604,648,857,861,864,923,940,959,961,975,1026,1141,1445,1604,1880,2150,3133,3146,3479,3481,3553,3569,3572,3574,3575,3586,3600,3689,3735,4067,4292,4602,4860,5159,5724,5777,6352,6659,6810,7037,7040,7048,7293,7525,8723,8741,8915,9308,9655,9846,10666,10673,11027,11126,11221,23308,23529,28526,54106,57162,64127,64332,79576,81704,114609,115650,140885,388552,729230	AKT1,AXL,B2M,BAD,BCL2,BCL6,BMI1,CAV1,RUNX1,RUNX3,CD6,CD28,CD40LG,CD47,CD81,CDKN1A,CHRNB2,CSK,CD55,GPR183,F2RL1,HLA-E,HMGB1,IGF1,IGF2,IL1B,IL6,IL6ST,IL7,IL7R,IL10,IL15,ITGB2,KARS1,LYN,MLH1,MYB,PNP,PDGFRB,PTAFR,PTPN6,CCL5,SOX4,STX4,TFRC,TGFB1,TGFBR2,TNFRSF4,YES1,SNX4,TNFSF13,BCL10,CD83,SOCS5,GAB2,CD226,TNFSF13B,LILRA2,CD160,DUSP10,ICOSLG,CLCF1,TRDC,TLR9,PELI1,NOD2,NFKBIZ,NKAP,DOCK8,TIRAP,TNFRSF13C,…
4_Member	GO Biological Processes	GO:0002696	positive regulation of leukocyte activation	-18.1884	-16.0819	72/409	207,558,567,572,596,604,648,857,861,864,923,940,959,961,975,1026,1141,1445,1604,1880,2150,3133,3146,3479,3481,3553,3569,3572,3574,3575,3586,3600,3689,3735,4067,4292,4602,4860,5724,5777,6352,6659,6810,7037,7040,7048,7293,7525,8723,8741,8915,9308,9655,9846,10666,10673,11126,11221,23308,23529,28526,54106,57162,64127,64332,79576,81704,114609,115650,140885,388552,729230	AKT1,AXL,B2M,BAD,BCL2,BCL6,BMI1,CAV1,RUNX1,RUNX3,CD6,CD28,CD40LG,CD47,CD81,CDKN1A,CHRNB2,CSK,CD55,GPR183,F2RL1,HLA-E,HMGB1,IGF1,IGF2,IL1B,IL6,IL6ST,IL7,IL7R,IL10,IL15,ITGB2,KARS1,LYN,MLH1,MYB,PNP,PTAFR,PTPN6,CCL5,SOX4,STX4,TFRC,TGFB1,TGFBR2,TNFRSF4,YES1,SNX4,TNFSF13,BCL10,CD83,SOCS5,GAB2,CD226,TNFSF13B,CD160,DUSP10,ICOSLG,CLCF1,TRDC,TLR9,PELI1,NOD2,NFKBIZ,NKAP,DOCK8,TIRAP,TNFRSF13C,SIRPA,BLOC1S3,…
4_Member	GO Biological Processes	GO:0070661	leukocyte proliferation	-17.8533	-15.7703	62/320	472,596,604,648,923,940,959,975,1026,1141,1191,1436,1604,1880,2150,2796,3133,3146,3479,3481,3553,3569,3572,3574,3575,3586,3600,3615,4064,4067,4478,4860,5074,5573,5594,5621,5777,5813,5880,6352,6556,7001,7037,7048,7128,7157,7293,9231,10673,22806,23308,23385,23529,23705,27242,51237,54106,57162,81704,114609,115650,729230	ATM,BCL2,BCL6,BMI1,CD6,CD28,CD40LG,CD81,CDKN1A,CHRNB2,CLU,CSF1R,CD55,GPR183,F2RL1,GNRH1,HLA-E,HMGB1,IGF1,IGF2,IL1B,IL6,IL6ST,IL7,IL7R,IL10,IL15,IMPDH2,CD180,LYN,MSN,PNP,PAWR,PRKAR1A,MAPK1,PRNP,PTPN6,PURA,RAC2,CCL5,SLC11A1,PRDX2,TFRC,TGFBR2,TNFAIP3,TP53,TNFRSF4,DLG5,TNFSF13B,IKZF3,ICOSLG,NCSTN,CLCF1,CADM1,TNFRSF21,MZB1,TLR9,PELI1,DOCK8,TIRAP,TNFRSF13C,CCR2
4_Member	GO Biological Processes	GO:0046651	lymphocyte proliferation	-16.7621	-14.7525	57/290	472,596,604,648,923,940,959,975,1026,1141,1604,1880,2796,3133,3146,3479,3481,3553,3569,3572,3574,3575,3586,3600,3615,4064,4067,4478,4860,5074,5573,5621,5777,5813,5880,6352,6556,7001,7037,7048,7157,7293,9231,10673,22806,23308,23385,23529,23705,27242,51237,54106,57162,81704,114609,115650,729230	ATM,BCL2,BCL6,BMI1,CD6,CD28,CD40LG,CD81,CDKN1A,CHRNB2,CD55,GPR183,GNRH1,HLA-E,HMGB1,IGF1,IGF2,IL1B,IL6,IL6ST,IL7,IL7R,IL10,IL15,IMPDH2,CD180,LYN,MSN,PNP,PAWR,PRKAR1A,PRNP,PTPN6,PURA,RAC2,CCL5,SLC11A1,PRDX2,TFRC,TGFBR2,TP53,TNFRSF4,DLG5,TNFSF13B,IKZF3,ICOSLG,NCSTN,CLCF1,CADM1,TNFRSF21,MZB1,TLR9,PELI1,DOCK8,TIRAP,TNFRSF13C,CCR2
4_Member	GO Biological Processes	GO:0032943	mononuclear cell proliferation	-16.5481	-14.5462	57/293	472,596,604,648,923,940,959,975,1026,1141,1604,1880,2796,3133,3146,3479,3481,3553,3569,3572,3574,3575,3586,3600,3615,4064,4067,4478,4860,5074,5573,5621,5777,5813,5880,6352,6556,7001,7037,7048,7157,7293,9231,10673,22806,23308,23385,23529,23705,27242,51237,54106,57162,81704,114609,115650,729230	ATM,BCL2,BCL6,BMI1,CD6,CD28,CD40LG,CD81,CDKN1A,CHRNB2,CD55,GPR183,GNRH1,HLA-E,HMGB1,IGF1,IGF2,IL1B,IL6,IL6ST,IL7,IL7R,IL10,IL15,IMPDH2,CD180,LYN,MSN,PNP,PAWR,PRKAR1A,PRNP,PTPN6,PURA,RAC2,CCL5,SLC11A1,PRDX2,TFRC,TGFBR2,TP53,TNFRSF4,DLG5,TNFSF13B,IKZF3,ICOSLG,NCSTN,CLCF1,CADM1,TNFRSF21,MZB1,TLR9,PELI1,DOCK8,TIRAP,TNFRSF13C,CCR2
4_Member	GO Biological Processes	GO:0050870	positive regulation of T cell activation	-16.4351	-14.4445	48/216	207,567,572,604,648,857,861,864,923,940,959,961,975,1445,1604,3133,3146,3479,3481,3553,3569,3572,3574,3575,3600,4067,4602,4860,5777,6352,6659,7037,7048,7525,8915,9308,9655,10673,11126,11221,23308,64127,64332,79576,81704,115650,140885,729230	AKT1,B2M,BAD,BCL6,BMI1,CAV1,RUNX1,RUNX3,CD6,CD28,CD40LG,CD47,CD81,CSK,CD55,HLA-E,HMGB1,IGF1,IGF2,IL1B,IL6,IL6ST,IL7,IL7R,IL15,LYN,MYB,PNP,PTPN6,CCL5,SOX4,TFRC,TGFBR2,YES1,BCL10,CD83,SOCS5,TNFSF13B,CD160,DUSP10,ICOSLG,NOD2,NFKBIZ,NKAP,DOCK8,TNFRSF13C,SIRPA,CCR2
4_Member	GO Biological Processes	GO:0051251	positive regulation of lymphocyte activation	-16.327	-14.34	64/362	207,558,567,572,596,604,648,857,861,864,923,940,959,961,975,1026,1141,1445,1604,1880,3133,3146,3479,3481,3553,3569,3572,3574,3575,3586,3600,4067,4292,4602,4860,5777,6352,6659,7037,7040,7048,7293,7525,8741,8915,9308,9655,10673,11126,11221,23308,23529,28526,54106,57162,64127,64332,79576,81704,114609,115650,140885,388552,729230	AKT1,AXL,B2M,BAD,BCL2,BCL6,BMI1,CAV1,RUNX1,RUNX3,CD6,CD28,CD40LG,CD47,CD81,CDKN1A,CHRNB2,CSK,CD55,GPR183,HLA-E,HMGB1,IGF1,IGF2,IL1B,IL6,IL6ST,IL7,IL7R,IL10,IL15,LYN,MLH1,MYB,PNP,PTPN6,CCL5,SOX4,TFRC,TGFB1,TGFBR2,TNFRSF4,YES1,TNFSF13,BCL10,CD83,SOCS5,TNFSF13B,CD160,DUSP10,ICOSLG,CLCF1,TRDC,TLR9,PELI1,NOD2,NFKBIZ,NKAP,DOCK8,TIRAP,TNFRSF13C,SIRPA,BLOC1S3,CCR2
4_Member	GO Biological Processes	GO:0070663	regulation of leukocyte proliferation	-14.7413	-12.8737	49/246	472,596,604,648,923,940,959,975,1026,1141,1436,1604,1880,2796,3133,3146,3479,3481,3553,3569,3572,3574,3586,3600,4067,4860,5074,5573,5594,5621,5777,5880,6352,7037,7048,7128,7293,9231,10673,22806,23308,23529,27242,51237,54106,57162,114609,115650,729230	ATM,BCL2,BCL6,BMI1,CD6,CD28,CD40LG,CD81,CDKN1A,CHRNB2,CSF1R,CD55,GPR183,GNRH1,HLA-E,HMGB1,IGF1,IGF2,IL1B,IL6,IL6ST,IL7,IL10,IL15,LYN,PNP,PAWR,PRKAR1A,MAPK1,PRNP,PTPN6,RAC2,CCL5,TFRC,TGFBR2,TNFAIP3,TNFRSF4,DLG5,TNFSF13B,IKZF3,ICOSLG,CLCF1,TNFRSF21,MZB1,TLR9,PELI1,TIRAP,TNFRSF13C,CCR2
4_Member	GO Biological Processes	GO:0050670	regulation of lymphocyte proliferation	-14.248	-12.4126	46/226	472,596,604,648,923,940,959,975,1026,1141,1604,1880,2796,3133,3146,3479,3481,3553,3569,3572,3574,3586,3600,4067,4860,5074,5573,5621,5777,5880,6352,7037,7048,7293,9231,10673,22806,23308,23529,27242,51237,54106,57162,114609,115650,729230	ATM,BCL2,BCL6,BMI1,CD6,CD28,CD40LG,CD81,CDKN1A,CHRNB2,CD55,GPR183,GNRH1,HLA-E,HMGB1,IGF1,IGF2,IL1B,IL6,IL6ST,IL7,IL10,IL15,LYN,PNP,PAWR,PRKAR1A,PRNP,PTPN6,RAC2,CCL5,TFRC,TGFBR2,TNFRSF4,DLG5,TNFSF13B,IKZF3,ICOSLG,CLCF1,TNFRSF21,MZB1,TLR9,PELI1,TIRAP,TNFRSF13C,CCR2
4_Member	GO Biological Processes	GO:0032944	regulation of mononuclear cell proliferation	-14.0977	-12.2726	46/228	472,596,604,648,923,940,959,975,1026,1141,1604,1880,2796,3133,3146,3479,3481,3553,3569,3572,3574,3586,3600,4067,4860,5074,5573,5621,5777,5880,6352,7037,7048,7293,9231,10673,22806,23308,23529,27242,51237,54106,57162,114609,115650,729230	ATM,BCL2,BCL6,BMI1,CD6,CD28,CD40LG,CD81,CDKN1A,CHRNB2,CD55,GPR183,GNRH1,HLA-E,HMGB1,IGF1,IGF2,IL1B,IL6,IL6ST,IL7,IL10,IL15,LYN,PNP,PAWR,PRKAR1A,PRNP,PTPN6,RAC2,CCL5,TFRC,TGFBR2,TNFRSF4,DLG5,TNFSF13B,IKZF3,ICOSLG,CLCF1,TNFRSF21,MZB1,TLR9,PELI1,TIRAP,TNFRSF13C,CCR2
4_Member	GO Biological Processes	GO:0070665	positive regulation of leukocyte proliferation	-13.5876	-11.8011	36/150	596,604,648,923,940,959,975,1026,1141,1436,1604,1880,3133,3146,3479,3481,3553,3569,3572,3574,3600,4067,4860,5594,6352,7037,7048,7293,10673,23308,23529,54106,57162,114609,115650,729230	BCL2,BCL6,BMI1,CD6,CD28,CD40LG,CD81,CDKN1A,CHRNB2,CSF1R,CD55,GPR183,HLA-E,HMGB1,IGF1,IGF2,IL1B,IL6,IL6ST,IL7,IL15,LYN,PNP,MAPK1,CCL5,TFRC,TGFBR2,TNFRSF4,TNFSF13B,ICOSLG,CLCF1,TLR9,PELI1,TIRAP,TNFRSF13C,CCR2
4_Member	GO Biological Processes	GO:0030888	regulation of B cell proliferation	-12.9562	-11.2198	23/64	472,596,604,648,975,1026,1141,1880,3574,3586,4067,5074,7037,7293,10673,22806,23529,27242,51237,54106,57162,114609,115650	ATM,BCL2,BCL6,BMI1,CD81,CDKN1A,CHRNB2,GPR183,IL7,IL10,LYN,PAWR,TFRC,TNFRSF4,TNFSF13B,IKZF3,CLCF1,TNFRSF21,MZB1,TLR9,PELI1,TIRAP,TNFRSF13C
4_Member	GO Biological Processes	GO:0030183	B cell differentiation	-12.9359	-11.2026	34/141	472,572,578,596,604,959,1316,1880,3394,3398,3516,3569,3574,3586,3624,3688,3955,4189,4853,4914,5336,5777,5795,6688,7157,7528,10673,10758,22806,23529,51341,54106,150372,359948	ATM,BAD,BAK1,BCL2,BCL6,CD40LG,KLF6,GPR183,IRF8,ID2,RBPJ,IL6,IL7,IL10,INHBA,ITGB1,LFNG,DNAJB9,NOTCH2,NTRK1,PLCG2,PTPN6,PTPRJ,SPI1,TP53,YY1,TNFSF13B,TRAF3IP2,IKZF3,CLCF1,ZBTB7A,TLR9,NFAM1,IRF2BP2
4_Member	GO Biological Processes	GO:0050671	positive regulation of lymphocyte proliferation	-12.5619	-10.8534	33/137	596,604,648,923,940,959,975,1026,1141,1604,1880,3133,3146,3479,3481,3553,3569,3572,3574,3600,4860,6352,7037,7048,7293,10673,23308,23529,54106,57162,114609,115650,729230	BCL2,BCL6,BMI1,CD6,CD28,CD40LG,CD81,CDKN1A,CHRNB2,CD55,GPR183,HLA-E,HMGB1,IGF1,IGF2,IL1B,IL6,IL6ST,IL7,IL15,PNP,CCL5,TFRC,TGFBR2,TNFRSF4,TNFSF13B,ICOSLG,CLCF1,TLR9,PELI1,TIRAP,TNFRSF13C,CCR2
4_Member	GO Biological Processes	GO:0032946	positive regulation of mononuclear cell proliferation	-12.4662	-10.7653	33/138	596,604,648,923,940,959,975,1026,1141,1604,1880,3133,3146,3479,3481,3553,3569,3572,3574,3600,4860,6352,7037,7048,7293,10673,23308,23529,54106,57162,114609,115650,729230	BCL2,BCL6,BMI1,CD6,CD28,CD40LG,CD81,CDKN1A,CHRNB2,CD55,GPR183,HLA-E,HMGB1,IGF1,IGF2,IL1B,IL6,IL6ST,IL7,IL15,PNP,CCL5,TFRC,TGFBR2,TNFRSF4,TNFSF13B,ICOSLG,CLCF1,TLR9,PELI1,TIRAP,TNFRSF13C,CCR2
4_Member	GO Biological Processes	GO:0042098	T cell proliferation	-12.1471	-10.4729	40/201	648,923,940,959,975,1604,2796,3133,3146,3479,3481,3553,3569,3572,3586,3600,4478,4860,5074,5573,5621,5777,5880,6352,6556,7001,7037,7048,7157,7293,9231,10673,23308,23385,23705,27242,57162,81704,115650,729230	BMI1,CD6,CD28,CD40LG,CD81,CD55,GNRH1,HLA-E,HMGB1,IGF1,IGF2,IL1B,IL6,IL6ST,IL10,IL15,MSN,PNP,PAWR,PRKAR1A,PRNP,PTPN6,RAC2,CCL5,SLC11A1,PRDX2,TFRC,TGFBR2,TP53,TNFRSF4,DLG5,TNFSF13B,ICOSLG,NCSTN,CADM1,TNFRSF21,PELI1,DOCK8,TNFRSF13C,CCR2
4_Member	GO Biological Processes	GO:0042100	B cell proliferation	-10.96	-9.37791	26/99	472,596,604,648,959,975,1026,1141,1880,3574,3575,3586,4064,4067,5074,7037,7293,10673,22806,23529,27242,51237,54106,57162,114609,115650	ATM,BCL2,BCL6,BMI1,CD40LG,CD81,CDKN1A,CHRNB2,GPR183,IL7,IL7R,IL10,CD180,LYN,PAWR,TFRC,TNFRSF4,TNFSF13B,IKZF3,CLCF1,TNFRSF21,MZB1,TLR9,PELI1,TIRAP,TNFRSF13C
4_Member	GO Biological Processes	GO:0050864	regulation of B cell activation	-10.4456	-8.90149	37/198	472,572,596,604,648,940,975,1026,1141,1880,3398,3569,3574,3586,3624,4067,4292,5074,5777,7037,7040,7128,7293,8741,10673,22806,23529,27242,28526,51237,54106,57162,64127,114609,115650,150372,374403	ATM,BAD,BCL2,BCL6,BMI1,CD28,CD81,CDKN1A,CHRNB2,GPR183,ID2,IL6,IL7,IL10,INHBA,LYN,MLH1,PAWR,PTPN6,TFRC,TGFB1,TNFAIP3,TNFRSF4,TNFSF13,TNFSF13B,IKZF3,CLCF1,TNFRSF21,TRDC,MZB1,TLR9,PELI1,NOD2,TIRAP,TNFRSF13C,NFAM1,TBC1D10C
4_Member	GO Biological Processes	GO:0030890	positive regulation of B cell proliferation	-9.65212	-8.17122	16/42	596,604,648,975,1026,1141,1880,3574,7037,7293,10673,23529,54106,57162,114609,115650	BCL2,BCL6,BMI1,CD81,CDKN1A,CHRNB2,GPR183,IL7,TFRC,TNFRSF4,TNFSF13B,CLCF1,TLR9,PELI1,TIRAP,TNFRSF13C
4_Member	GO Biological Processes	GO:0042129	regulation of T cell proliferation	-9.07854	-7.64471	32/172	648,923,940,959,975,1604,2796,3133,3146,3479,3481,3553,3569,3572,3586,3600,4860,5074,5573,5621,5777,5880,6352,7037,7048,9231,10673,23308,27242,57162,115650,729230	BMI1,CD6,CD28,CD40LG,CD81,CD55,GNRH1,HLA-E,HMGB1,IGF1,IGF2,IL1B,IL6,IL6ST,IL10,IL15,PNP,PAWR,PRKAR1A,PRNP,PTPN6,RAC2,CCL5,TFRC,TGFBR2,DLG5,TNFSF13B,ICOSLG,TNFRSF21,PELI1,TNFRSF13C,CCR2
4_Member	GO Biological Processes	GO:0042102	positive regulation of T cell proliferation	-7.73903	-6.41155	22/101	648,923,940,959,975,1604,3133,3146,3479,3481,3553,3569,3572,3600,4860,6352,7037,7048,10673,23308,115650,729230	BMI1,CD6,CD28,CD40LG,CD81,CD55,HLA-E,HMGB1,IGF1,IGF2,IL1B,IL6,IL6ST,IL15,PNP,CCL5,TFRC,TGFBR2,TNFSF13B,ICOSLG,TNFRSF13C,CCR2
4_Member	GO Biological Processes	GO:0050871	positive regulation of B cell activation	-6.17803	-4.99501	25/152	572,596,604,648,940,975,1026,1141,1880,3569,3574,3586,4292,7037,7040,7293,8741,10673,23529,28526,54106,57162,64127,114609,115650	BAD,BCL2,BCL6,BMI1,CD28,CD81,CDKN1A,CHRNB2,GPR183,IL6,IL7,IL10,MLH1,TFRC,TGFB1,TNFRSF4,TNFSF13,TNFSF13B,CLCF1,TRDC,TLR9,PELI1,NOD2,TIRAP,TNFRSF13C
5_Summary	GO Biological Processes	GO:0010942	positive regulation of cell death	-39.6906	-36.107	128/618	102,142,207,324,355,356,472,572,578,580,604,650,815,857,959,1019,1026,1027,1029,1191,1385,1509,1613,1616,1654,1723,1843,1869,1871,1894,1917,1948,1958,1965,2071,2150,2308,2353,2903,2931,3146,3169,3209,3482,3569,3586,3624,3655,3688,3689,3934,4058,4067,4170,4293,4602,4804,4843,4851,4853,4914,5074,5159,5293,5300,5326,5366,5468,5499,5524,5601,5621,5728,5740,5915,5978,5979,6352,6416,6498,6548,6648,6659…	ADAM10,PARP1,AKT1,APC,FAS,FASLG,ATM,BAD,BAK1,BARD1,BCL6,BMP2,CAMK2A,CAV1,CD40LG,CDK4,CDKN1A,CDKN1B,CDKN2A,CLU,CREB1,CTSD,DAPK3,DAXX,DDX3X,DHODH,DUSP1,E2F1,E2F3,ECT2,EEF1A2,EFNB2,EGR1,EIF2S1,ERCC3,F2RL1,FOXO1,FOS,GRIN2A,GSK3A,HMGB1,FOXA1,HOXA13,IGF2R,IL6,IL10,INHBA,ITGA6,ITGB1,ITGB2,LCN2,LTK,LYN,MCL1,MAP3K9,MYB,NGFR,NOS2,NOTCH1,NOTCH2,NTRK1,PAWR,PDGFRB,PIK3CD,PIN1,PLAGL2,PMAIP1,PPARG,PPP1CA,PTPA,M…
5_Member	GO Biological Processes	GO:0010942	positive regulation of cell death	-39.6906	-36.107	128/618	102,142,207,324,355,356,472,572,578,580,604,650,815,857,959,1019,1026,1027,1029,1191,1385,1509,1613,1616,1654,1723,1843,1869,1871,1894,1917,1948,1958,1965,2071,2150,2308,2353,2903,2931,3146,3169,3209,3482,3569,3586,3624,3655,3688,3689,3934,4058,4067,4170,4293,4602,4804,4843,4851,4853,4914,5074,5159,5293,5300,5326,5366,5468,5499,5524,5601,5621,5728,5740,5915,5978,5979,6352,6416,6498,6548,6648,6659…	ADAM10,PARP1,AKT1,APC,FAS,FASLG,ATM,BAD,BAK1,BARD1,BCL6,BMP2,CAMK2A,CAV1,CD40LG,CDK4,CDKN1A,CDKN1B,CDKN2A,CLU,CREB1,CTSD,DAPK3,DAXX,DDX3X,DHODH,DUSP1,E2F1,E2F3,ECT2,EEF1A2,EFNB2,EGR1,EIF2S1,ERCC3,F2RL1,FOXO1,FOS,GRIN2A,GSK3A,HMGB1,FOXA1,HOXA13,IGF2R,IL6,IL10,INHBA,ITGA6,ITGB1,ITGB2,LCN2,LTK,LYN,MCL1,MAP3K9,MYB,NGFR,NOS2,NOTCH1,NOTCH2,NTRK1,PAWR,PDGFRB,PIK3CD,PIN1,PLAGL2,PMAIP1,PPARG,PPP1CA,PTPA,M…
5_Member	GO Biological Processes	GO:0043068	positive regulation of programmed cell death	-37.0404	-33.6787	117/555	102,207,324,355,356,472,572,578,580,604,650,815,857,959,1019,1026,1029,1191,1385,1509,1613,1654,1723,1843,1869,1871,1894,1917,1965,2071,2150,2308,2903,2931,3146,3169,3209,3482,3569,3586,3624,3655,3688,3934,4058,4067,4170,4293,4602,4804,4843,4851,4853,4914,5074,5159,5293,5300,5326,5366,5468,5499,5524,5601,5621,5728,5740,5915,5978,5979,6352,6416,6498,6548,6648,6659,6788,6789,7098,7157,7262,8061,868…	ADAM10,AKT1,APC,FAS,FASLG,ATM,BAD,BAK1,BARD1,BCL6,BMP2,CAMK2A,CAV1,CD40LG,CDK4,CDKN1A,CDKN2A,CLU,CREB1,CTSD,DAPK3,DDX3X,DHODH,DUSP1,E2F1,E2F3,ECT2,EEF1A2,EIF2S1,ERCC3,F2RL1,FOXO1,GRIN2A,GSK3A,HMGB1,FOXA1,HOXA13,IGF2R,IL6,IL10,INHBA,ITGA6,ITGB1,LCN2,LTK,LYN,MCL1,MAP3K9,MYB,NGFR,NOS2,NOTCH1,NOTCH2,NTRK1,PAWR,PDGFRB,PIK3CD,PIN1,PLAGL2,PMAIP1,PPARG,PPP1CA,PTPA,MAPK9,PRNP,PTEN,PTGIS,RARB,REST,RET,CCL5…
5_Member	GO Biological Processes	GO:0043065	positive regulation of apoptotic process	-35.5324	-32.2498	113/539	102,207,324,355,356,472,572,578,580,604,650,815,857,959,1019,1029,1191,1385,1509,1613,1654,1723,1843,1869,1871,1894,1917,1965,2071,2308,2903,2931,3146,3169,3209,3482,3569,3586,3624,3655,3688,3934,4058,4067,4170,4293,4602,4804,4851,4853,5074,5159,5293,5300,5326,5366,5468,5499,5524,5601,5621,5728,5740,5915,5978,5979,6352,6416,6498,6548,6648,6659,6788,6789,7098,7157,7262,8061,8682,8795,8851,8915,926…	ADAM10,AKT1,APC,FAS,FASLG,ATM,BAD,BAK1,BARD1,BCL6,BMP2,CAMK2A,CAV1,CD40LG,CDK4,CDKN2A,CLU,CREB1,CTSD,DAPK3,DDX3X,DHODH,DUSP1,E2F1,E2F3,ECT2,EEF1A2,EIF2S1,ERCC3,FOXO1,GRIN2A,GSK3A,HMGB1,FOXA1,HOXA13,IGF2R,IL6,IL10,INHBA,ITGA6,ITGB1,LCN2,LTK,LYN,MCL1,MAP3K9,MYB,NGFR,NOTCH1,NOTCH2,PAWR,PDGFRB,PIK3CD,PIN1,PLAGL2,PMAIP1,PPARG,PPP1CA,PTPA,MAPK9,PRNP,PTEN,PTGIS,RARB,REST,RET,CCL5,MAP2K4,SKIL,SLC9A1,SOD2…
6_Summary	GO Biological Processes	GO:0002521	leukocyte differentiation	-38.1012	-34.6426	117/542	142,326,351,472,538,558,567,572,578,596,604,632,648,814,861,864,915,940,959,975,1230,1235,1316,1385,1432,1436,1880,1958,2101,2150,2353,2529,2739,3146,3394,3398,3516,3553,3569,3570,3574,3575,3586,3600,3624,3662,3665,3688,3696,3702,3955,4067,4092,4189,4602,4627,4853,4860,4914,5048,5293,5316,5336,5468,5578,5657,5734,5777,5795,5925,6095,6659,6688,6722,6774,6932,7001,7037,7040,7048,7071,7098,7157,7226…	PARP1,AIRE,APP,ATM,ATP7A,AXL,B2M,BAD,BAK1,BCL2,BCL6,BGLAP,BMI1,CAMK4,RUNX1,RUNX3,CD3D,CD28,CD40LG,CD81,CCR1,CCR6,KLF6,CREB1,MAPK14,CSF1R,GPR183,EGR1,ESRRA,F2RL1,FOS,FUT7,GLO1,HMGB1,IRF8,ID2,RBPJ,IL1B,IL6,IL6R,IL7,IL7R,IL10,IL15,INHBA,IRF4,IRF7,ITGB1,ITGB8,ITK,LFNG,LYN,SMAD7,DNAJB9,MYB,MYH9,NOTCH2,PNP,NTRK1,PAFAH1B1,PIK3CD,PKNOX1,PLCG2,PPARG,PRKCA,PRTN3,PTGER4,PTPN6,PTPRJ,RB1,RORA,SOX4,SPI1,SRF,ST…
6_Member	GO Biological Processes	GO:0002521	leukocyte differentiation	-38.1012	-34.6426	117/542	142,326,351,472,538,558,567,572,578,596,604,632,648,814,861,864,915,940,959,975,1230,1235,1316,1385,1432,1436,1880,1958,2101,2150,2353,2529,2739,3146,3394,3398,3516,3553,3569,3570,3574,3575,3586,3600,3624,3662,3665,3688,3696,3702,3955,4067,4092,4189,4602,4627,4853,4860,4914,5048,5293,5316,5336,5468,5578,5657,5734,5777,5795,5925,6095,6659,6688,6722,6774,6932,7001,7037,7040,7048,7071,7098,7157,7226…	PARP1,AIRE,APP,ATM,ATP7A,AXL,B2M,BAD,BAK1,BCL2,BCL6,BGLAP,BMI1,CAMK4,RUNX1,RUNX3,CD3D,CD28,CD40LG,CD81,CCR1,CCR6,KLF6,CREB1,MAPK14,CSF1R,GPR183,EGR1,ESRRA,F2RL1,FOS,FUT7,GLO1,HMGB1,IRF8,ID2,RBPJ,IL1B,IL6,IL6R,IL7,IL7R,IL10,IL15,INHBA,IRF4,IRF7,ITGB1,ITGB8,ITK,LFNG,LYN,SMAD7,DNAJB9,MYB,MYH9,NOTCH2,PNP,NTRK1,PAFAH1B1,PIK3CD,PKNOX1,PLCG2,PPARG,PRKCA,PRTN3,PTGER4,PTPN6,PTPRJ,RB1,RORA,SOX4,SPI1,SRF,ST…
6_Member	GO Biological Processes	GO:1903131	mononuclear cell differentiation	-29.2862	-26.456	91/426	326,472,538,558,567,572,578,596,604,648,814,861,864,915,940,959,1235,1316,1436,1880,1958,2150,2529,3146,3394,3398,3516,3553,3569,3570,3574,3575,3586,3600,3624,3662,3665,3688,3696,3702,3955,4067,4092,4189,4602,4627,4853,4860,4914,5293,5316,5336,5468,5657,5734,5777,5795,6095,6659,6688,6722,6774,6932,7001,7048,7157,7226,7248,7301,7422,7528,8581,9308,9655,10673,10758,11221,22806,23529,25831,51341,541…	AIRE,ATM,ATP7A,AXL,B2M,BAD,BAK1,BCL2,BCL6,BMI1,CAMK4,RUNX1,RUNX3,CD3D,CD28,CD40LG,CCR6,KLF6,CSF1R,GPR183,EGR1,F2RL1,FUT7,HMGB1,IRF8,ID2,RBPJ,IL1B,IL6,IL6R,IL7,IL7R,IL10,IL15,INHBA,IRF4,IRF7,ITGB1,ITGB8,ITK,LFNG,LYN,SMAD7,DNAJB9,MYB,MYH9,NOTCH2,PNP,NTRK1,PIK3CD,PKNOX1,PLCG2,PPARG,PRTN3,PTGER4,PTPN6,PTPRJ,RORA,SOX4,SPI1,SRF,STAT3,TCF7,PRDX2,TGFBR2,TP53,TRPM2,TSC1,TYRO3,VEGFA,YY1,LY6D,CD83,SOCS5,TNF…
6_Member	GO Biological Processes	GO:0030098	lymphocyte differentiation	-25.9115	-23.231	80/373	326,472,538,558,567,572,578,596,604,648,814,861,864,915,940,959,1235,1316,1880,1958,2529,3146,3394,3398,3516,3553,3569,3570,3574,3575,3586,3600,3624,3662,3688,3702,3955,4092,4189,4602,4853,4860,4914,5293,5316,5336,5734,5777,5795,6095,6659,6688,6722,6774,6932,7001,7048,7157,7248,7301,7528,8581,9308,9655,10673,10758,11221,22806,23529,25831,51341,54106,55636,64332,64919,79576,150372,359948,653519,72…	AIRE,ATM,ATP7A,AXL,B2M,BAD,BAK1,BCL2,BCL6,BMI1,CAMK4,RUNX1,RUNX3,CD3D,CD28,CD40LG,CCR6,KLF6,GPR183,EGR1,FUT7,HMGB1,IRF8,ID2,RBPJ,IL1B,IL6,IL6R,IL7,IL7R,IL10,IL15,INHBA,IRF4,ITGB1,ITK,LFNG,SMAD7,DNAJB9,MYB,NOTCH2,PNP,NTRK1,PIK3CD,PKNOX1,PLCG2,PTGER4,PTPN6,PTPRJ,RORA,SOX4,SPI1,SRF,STAT3,TCF7,PRDX2,TGFBR2,TP53,TSC1,TYRO3,YY1,LY6D,CD83,SOCS5,TNFSF13B,TRAF3IP2,DUSP10,IKZF3,CLCF1,HECTD1,ZBTB7A,TLR9,CHD…
6_Member	GO Biological Processes	GO:1903706	regulation of hemopoiesis	-17.0233	-14.9838	66/370	91,182,558,567,572,604,632,814,861,864,940,1230,1385,1432,2101,2353,3091,3146,3148,3304,3313,3398,3574,3575,3586,3600,3624,3662,3665,4067,4092,4602,4850,4853,4860,5578,5600,5777,5814,5925,6659,6688,6774,6932,7001,7040,7048,7071,7098,7538,8451,9308,9370,9655,10456,10766,11221,22806,23456,54106,56998,64332,79576,150372,171392,729230	ACVR1B,JAG1,AXL,B2M,BAD,BCL6,BGLAP,CAMK4,RUNX1,RUNX3,CD28,CCR1,CREB1,MAPK14,ESRRA,FOS,HIF1A,HMGB1,HMGB2,HSPA1B,HSPA9,ID2,IL7,IL7R,IL10,IL15,INHBA,IRF4,IRF7,LYN,SMAD7,MYB,CNOT4,NOTCH2,PNP,PRKCA,MAPK11,PTPN6,PURB,RB1,SOX4,SPI1,STAT3,TCF7,PRDX2,TGFB1,TGFBR2,KLF10,TLR3,ZFP36,CUL4A,CD83,ADIPOQ,SOCS5,HAX1,TOB2,DUSP10,IKZF3,ABCB10,TLR9,CTNNBIP1,NFKBIZ,NKAP,NFAM1,ZNF675,CCR2
6_Member	GO Biological Processes	GO:0030217	T cell differentiation	-15.979	-14.0221	52/256	326,538,567,572,596,604,648,814,861,864,915,940,1235,1880,1958,2529,3146,3553,3569,3570,3574,3575,3600,3662,3702,3955,4092,4602,4860,5293,5316,5734,6095,6659,6688,6722,6774,6932,7001,7048,7157,7248,9308,9655,10758,11221,55636,64332,64919,79576,653519,729230	AIRE,ATP7A,B2M,BAD,BCL2,BCL6,BMI1,CAMK4,RUNX1,RUNX3,CD3D,CD28,CCR6,GPR183,EGR1,FUT7,HMGB1,IL1B,IL6,IL6R,IL7,IL7R,IL15,IRF4,ITK,LFNG,SMAD7,MYB,PNP,PIK3CD,PKNOX1,PTGER4,RORA,SOX4,SPI1,SRF,STAT3,TCF7,PRDX2,TGFBR2,TP53,TSC1,CD83,SOCS5,TRAF3IP2,DUSP10,CHD7,NFKBIZ,BCL11B,NKAP,GPR89A,CCR2
6_Member	GO Biological Processes	GO:1902105	regulation of leukocyte differentiation	-13.6089	-11.8178	51/281	558,572,604,632,814,861,864,940,1230,1385,2101,2353,3146,3398,3574,3575,3586,3600,3624,3662,3665,4067,4092,4602,4853,4860,5578,5777,5925,6659,6932,7001,7040,7048,7071,7098,8451,9308,9370,9655,10456,10766,11221,22806,54106,56998,64332,79576,150372,171392,729230	AXL,BAD,BCL6,BGLAP,CAMK4,RUNX1,RUNX3,CD28,CCR1,CREB1,ESRRA,FOS,HMGB1,ID2,IL7,IL7R,IL10,IL15,INHBA,IRF4,IRF7,LYN,SMAD7,MYB,NOTCH2,PNP,PRKCA,PTPN6,RB1,SOX4,TCF7,PRDX2,TGFB1,TGFBR2,KLF10,TLR3,CUL4A,CD83,ADIPOQ,SOCS5,HAX1,TOB2,DUSP10,IKZF3,TLR9,CTNNBIP1,NFKBIZ,NKAP,NFAM1,ZNF675,CCR2
6_Member	GO Biological Processes	GO:0046631	alpha-beta T cell activation	-9.62894	-8.14918	31/155	538,596,604,861,864,940,975,1604,1880,2529,3133,3146,3569,3570,3600,3662,3702,4092,4602,4860,5734,6095,6774,7048,9308,9655,11126,64332,64919,79576,729230	ATP7A,BCL2,BCL6,RUNX1,RUNX3,CD28,CD81,CD55,GPR183,FUT7,HLA-E,HMGB1,IL6,IL6R,IL15,IRF4,ITK,SMAD7,MYB,PNP,PTGER4,RORA,STAT3,TGFBR2,CD83,SOCS5,CD160,NFKBIZ,BCL11B,NKAP,CCR2
6_Member	GO Biological Processes	GO:0045619	regulation of lymphocyte differentiation	-8.94719	-7.5235	32/174	558,572,604,814,861,864,940,3146,3398,3574,3575,3586,3600,3624,3662,4092,4602,4860,5777,6659,6932,7001,7048,9308,9655,11221,22806,54106,64332,79576,150372,729230	AXL,BAD,BCL6,CAMK4,RUNX1,RUNX3,CD28,HMGB1,ID2,IL7,IL7R,IL10,IL15,INHBA,IRF4,SMAD7,MYB,PNP,PTPN6,SOX4,TCF7,PRDX2,TGFBR2,CD83,SOCS5,DUSP10,IKZF3,TLR9,NFKBIZ,NKAP,NFAM1,CCR2
6_Member	GO Biological Processes	GO:1902107	positive regulation of leukocyte differentiation	-8.70537	-7.30223	30/159	558,572,604,861,864,1230,1385,2353,3146,3398,3574,3575,3586,3600,4602,4853,4860,5578,5925,6659,7040,7048,7071,9308,9655,10456,11221,56998,64332,79576	AXL,BAD,BCL6,RUNX1,RUNX3,CCR1,CREB1,FOS,HMGB1,ID2,IL7,IL7R,IL10,IL15,MYB,NOTCH2,PNP,PRKCA,RB1,SOX4,TGFB1,TGFBR2,KLF10,CD83,SOCS5,HAX1,DUSP10,CTNNBIP1,NFKBIZ,NKAP
6_Member	GO Biological Processes	GO:1903708	positive regulation of hemopoiesis	-8.70537	-7.30223	30/159	558,572,604,861,864,1230,1385,2353,3146,3398,3574,3575,3586,3600,4602,4853,4860,5578,5925,6659,7040,7048,7071,9308,9655,10456,11221,56998,64332,79576	AXL,BAD,BCL6,RUNX1,RUNX3,CCR1,CREB1,FOS,HMGB1,ID2,IL7,IL7R,IL10,IL15,MYB,NOTCH2,PNP,PRKCA,RB1,SOX4,TGFB1,TGFBR2,KLF10,CD83,SOCS5,HAX1,DUSP10,CTNNBIP1,NFKBIZ,NKAP
6_Member	GO Biological Processes	GO:0046632	alpha-beta T cell differentiation	-8.31301	-6.94825	24/111	538,596,604,861,864,1880,2529,3146,3569,3570,3662,3702,4092,4602,4860,5734,6095,6774,7048,9308,9655,64332,64919,79576	ATP7A,BCL2,BCL6,RUNX1,RUNX3,GPR183,FUT7,HMGB1,IL6,IL6R,IRF4,ITK,SMAD7,MYB,PNP,PTGER4,RORA,STAT3,TGFBR2,CD83,SOCS5,NFKBIZ,BCL11B,NKAP
6_Member	GO Biological Processes	GO:0035710	CD4-positive, alpha-beta T cell activation	-7.73903	-6.41155	22/101	538,604,861,864,975,1604,1880,2529,3146,3569,3570,3662,4092,4602,5734,6095,6774,7048,9308,9655,11126,64332	ATP7A,BCL6,RUNX1,RUNX3,CD81,CD55,GPR183,FUT7,HMGB1,IL6,IL6R,IRF4,SMAD7,MYB,PTGER4,RORA,STAT3,TGFBR2,CD83,SOCS5,CD160,NFKBIZ
6_Member	GO Biological Processes	GO:0043367	CD4-positive, alpha-beta T cell differentiation	-6.5054	-5.28795	18/82	538,604,861,864,1880,2529,3146,3569,3570,3662,4092,4602,5734,6095,6774,9308,9655,64332	ATP7A,BCL6,RUNX1,RUNX3,GPR183,FUT7,HMGB1,IL6,IL6R,IRF4,SMAD7,MYB,PTGER4,RORA,STAT3,CD83,SOCS5,NFKBIZ
6_Member	GO Biological Processes	GO:0002286	T cell activation involved in immune response	-6.18352	-4.99848	21/113	538,604,975,1880,2150,3146,3383,3569,3570,3662,4092,4602,5734,5873,6095,6556,6774,7157,7248,9655,64332	ATP7A,BCL6,CD81,GPR183,F2RL1,HMGB1,ICAM1,IL6,IL6R,IRF4,SMAD7,MYB,PTGER4,RAB27A,RORA,SLC11A1,STAT3,TP53,TSC1,SOCS5,NFKBIZ
6_Member	GO Biological Processes	GO:0045580	regulation of T cell differentiation	-5.95323	-4.79017	24/146	572,604,814,861,864,940,3146,3574,3575,3600,3662,4092,4602,4860,6659,6932,7001,7048,9308,9655,11221,64332,79576,729230	BAD,BCL6,CAMK4,RUNX1,RUNX3,CD28,HMGB1,IL7,IL7R,IL15,IRF4,SMAD7,MYB,PNP,SOX4,TCF7,PRDX2,TGFBR2,CD83,SOCS5,DUSP10,NFKBIZ,NKAP,CCR2
6_Member	GO Biological Processes	GO:0046635	positive regulation of alpha-beta T cell activation	-5.64099	-4.50998	15/67	861,864,940,975,1604,3133,4602,4860,7048,9308,9655,11126,64332,79576,729230	RUNX1,RUNX3,CD28,CD81,CD55,HLA-E,MYB,PNP,TGFBR2,CD83,SOCS5,CD160,NFKBIZ,NKAP,CCR2
6_Member	GO Biological Processes	GO:0046634	regulation of alpha-beta T cell activation	-5.54124	-4.42331	19/104	604,861,864,940,975,1604,3133,3146,3662,4092,4602,4860,7048,9308,9655,11126,64332,79576,729230	BCL6,RUNX1,RUNX3,CD28,CD81,CD55,HLA-E,HMGB1,IRF4,SMAD7,MYB,PNP,TGFBR2,CD83,SOCS5,CD160,NFKBIZ,NKAP,CCR2
6_Member	GO Biological Processes	GO:0042093	T-helper cell differentiation	-5.09707	-4.02226	14/65	538,604,1880,3146,3569,3570,3662,4092,4602,5734,6095,6774,9655,64332	ATP7A,BCL6,GPR183,HMGB1,IL6,IL6R,IRF4,SMAD7,MYB,PTGER4,RORA,STAT3,SOCS5,NFKBIZ
6_Member	GO Biological Processes	GO:0002292	T cell differentiation involved in immune response	-5.07389	-4.00377	15/74	538,604,1880,3146,3569,3570,3662,4092,4602,5734,6095,6774,7248,9655,64332	ATP7A,BCL6,GPR183,HMGB1,IL6,IL6R,IRF4,SMAD7,MYB,PTGER4,RORA,STAT3,TSC1,SOCS5,NFKBIZ
7_Summary	GO Biological Processes	GO:0001817	regulation of cytokine production	-37.3719	-33.9644	144/799	113,116,326,351,558,566,567,604,657,672,814,861,923,940,959,961,975,1191,1385,1432,1436,1445,1604,1654,1958,1991,2069,2149,2150,2152,2627,2867,3091,3133,3146,3148,3265,3304,3394,3479,3553,3554,3556,3569,3570,3572,3574,3586,3600,3624,3654,3662,3665,3685,3696,3702,4067,4089,4092,4602,4790,4843,4860,5027,5054,5293,5336,5452,5552,5600,5621,5724,5734,5777,5795,5861,5966,6095,6556,6774,7040,7098,7128,7…	ADCY7,ADCYAP1,AIRE,APP,AXL,AZU1,B2M,BCL6,BMPR1A,BRCA1,CAMK4,RUNX1,CD6,CD28,CD40LG,CD47,CD81,CLU,CREB1,MAPK14,CSF1R,CSK,CD55,DDX3X,EGR1,ELANE,EREG,F2R,F2RL1,F3,GATA6,FFAR2,HIF1A,HLA-E,HMGB1,HMGB2,HRAS,HSPA1B,IRF8,IGF1,IL1B,IL1R1,IL1RAP,IL6,IL6R,IL6ST,IL7,IL10,IL15,INHBA,IRAK1,IRF4,IRF7,ITGAV,ITGB8,ITK,LYN,SMAD4,SMAD7,MYB,NFKB1,NOS2,PNP,P2RX7,SERPINE1,PIK3CD,PLCG2,POU2F2,SRGN,MAPK11,PRNP,PTAFR,PTGE…
7_Member	GO Biological Processes	GO:0001817	regulation of cytokine production	-37.3719	-33.9644	144/799	113,116,326,351,558,566,567,604,657,672,814,861,923,940,959,961,975,1191,1385,1432,1436,1445,1604,1654,1958,1991,2069,2149,2150,2152,2627,2867,3091,3133,3146,3148,3265,3304,3394,3479,3553,3554,3556,3569,3570,3572,3574,3586,3600,3624,3654,3662,3665,3685,3696,3702,4067,4089,4092,4602,4790,4843,4860,5027,5054,5293,5336,5452,5552,5600,5621,5724,5734,5777,5795,5861,5966,6095,6556,6774,7040,7098,7128,7…	ADCY7,ADCYAP1,AIRE,APP,AXL,AZU1,B2M,BCL6,BMPR1A,BRCA1,CAMK4,RUNX1,CD6,CD28,CD40LG,CD47,CD81,CLU,CREB1,MAPK14,CSF1R,CSK,CD55,DDX3X,EGR1,ELANE,EREG,F2R,F2RL1,F3,GATA6,FFAR2,HIF1A,HLA-E,HMGB1,HMGB2,HRAS,HSPA1B,IRF8,IGF1,IL1B,IL1R1,IL1RAP,IL6,IL6R,IL6ST,IL7,IL10,IL15,INHBA,IRAK1,IRF4,IRF7,ITGAV,ITGB8,ITK,LYN,SMAD4,SMAD7,MYB,NFKB1,NOS2,PNP,P2RX7,SERPINE1,PIK3CD,PLCG2,POU2F2,SRGN,MAPK11,PRNP,PTAFR,PTGE…
7_Member	GO Biological Processes	GO:0001819	positive regulation of cytokine production	-32.2545	-29.1715	100/467	116,326,351,566,567,657,672,814,861,923,940,959,975,1191,1385,1432,1436,1604,1654,1958,1991,2069,2149,2150,2152,2627,2867,3091,3133,3146,3148,3265,3304,3394,3553,3554,3556,3569,3570,3572,3574,3586,3600,3654,3662,3665,3702,4602,4843,4860,5027,5054,5293,5336,5452,5600,5724,5734,5795,5861,6095,6556,6774,7040,7098,7291,7294,8482,8915,9308,9370,9451,9971,10417,10564,10621,10666,10972,11027,11126,11128…	ADCYAP1,AIRE,APP,AZU1,B2M,BMPR1A,BRCA1,CAMK4,RUNX1,CD6,CD28,CD40LG,CD81,CLU,CREB1,MAPK14,CSF1R,CD55,DDX3X,EGR1,ELANE,EREG,F2R,F2RL1,F3,GATA6,FFAR2,HIF1A,HLA-E,HMGB1,HMGB2,HRAS,HSPA1B,IRF8,IL1B,IL1R1,IL1RAP,IL6,IL6R,IL6ST,IL7,IL10,IL15,IRAK1,IRF4,IRF7,ITK,MYB,NOS2,PNP,P2RX7,SERPINE1,PIK3CD,PLCG2,POU2F2,MAPK11,PTAFR,PTGER4,PTPRJ,RAB1A,RORA,SLC11A1,STAT3,TGFB1,TLR3,TWIST1,TXK,SEMA7A,BCL10,CD83,ADIPO…
7_Member	GO Biological Processes	GO:0032642	regulation of chemokine production	-15.5562	-13.6259	31/97	116,326,351,566,1436,1654,1958,1991,2150,2867,3091,3146,3553,3569,3570,3574,3586,7098,7291,9370,9655,23512,27159,51284,54106,57506,59307,64127,114609,114899,140885	ADCYAP1,AIRE,APP,AZU1,CSF1R,DDX3X,EGR1,ELANE,F2RL1,FFAR2,HIF1A,HMGB1,IL1B,IL6,IL6R,IL7,IL10,TLR3,TWIST1,ADIPOQ,SOCS5,SUZ12,CHIA,TLR7,TLR9,MAVS,SIGIRR,NOD2,TIRAP,C1QTNF3,SIRPA
7_Member	GO Biological Processes	GO:0032602	chemokine production	-15.414	-13.4994	31/98	116,326,351,566,1436,1654,1958,1991,2150,2867,3091,3146,3553,3569,3570,3574,3586,7098,7291,9370,9655,23512,27159,51284,54106,57506,59307,64127,114609,114899,140885	ADCYAP1,AIRE,APP,AZU1,CSF1R,DDX3X,EGR1,ELANE,F2RL1,FFAR2,HIF1A,HMGB1,IL1B,IL6,IL6R,IL7,IL10,TLR3,TWIST1,ADIPOQ,SOCS5,SUZ12,CHIA,TLR7,TLR9,MAVS,SIGIRR,NOD2,TIRAP,C1QTNF3,SIRPA
7_Member	GO Biological Processes	GO:0032722	positive regulation of chemokine production	-12.965	-11.2266	24/70	116,326,351,566,1436,1654,1958,2150,2867,3091,3146,3553,3569,3570,3574,7098,7291,9370,27159,51284,54106,57506,64127,114609	ADCYAP1,AIRE,APP,AZU1,CSF1R,DDX3X,EGR1,F2RL1,FFAR2,HIF1A,HMGB1,IL1B,IL6,IL6R,IL7,TLR3,TWIST1,ADIPOQ,CHIA,TLR7,TLR9,MAVS,NOD2,TIRAP
7_Member	GO Biological Processes	GO:0032757	positive regulation of interleukin-8 production	-12.291	-10.6024	22/62	1991,2149,2150,2152,2867,3146,3304,3553,3569,4843,5054,5861,6774,7098,8915,9370,11027,51284,54106,57506,64127,114609	ELANE,F2R,F2RL1,F3,FFAR2,HMGB1,HSPA1B,IL1B,IL6,NOS2,SERPINE1,RAB1A,STAT3,TLR3,BCL10,ADIPOQ,LILRA2,TLR7,TLR9,MAVS,NOD2,TIRAP
7_Member	GO Biological Processes	GO:0032755	positive regulation of interleukin-6 production	-10.8073	-9.23872	25/93	116,351,2069,2149,2150,3146,3553,3556,3569,3570,4843,5336,5452,5724,6774,7098,7291,8915,10417,11027,51284,54106,57506,64127,114609	ADCYAP1,APP,EREG,F2R,F2RL1,HMGB1,IL1B,IL1RAP,IL6,IL6R,NOS2,PLCG2,POU2F2,PTAFR,STAT3,TLR3,TWIST1,BCL10,SPON2,LILRA2,TLR7,TLR9,MAVS,NOD2,TIRAP
7_Member	GO Biological Processes	GO:0032635	interleukin-6 production	-10.2789	-8.74971	33/164	116,351,961,1445,2069,2149,2150,3146,3553,3556,3569,3570,3586,4843,5336,5452,5724,5777,6774,7098,7128,7291,8915,9655,10417,11027,51284,54106,57506,64127,114609,114899,140885	ADCYAP1,APP,CD47,CSK,EREG,F2R,F2RL1,HMGB1,IL1B,IL1RAP,IL6,IL6R,IL10,NOS2,PLCG2,POU2F2,PTAFR,PTPN6,STAT3,TLR3,TNFAIP3,TWIST1,BCL10,SOCS5,SPON2,LILRA2,TLR7,TLR9,MAVS,NOD2,TIRAP,C1QTNF3,SIRPA
7_Member	GO Biological Processes	GO:0032675	regulation of interleukin-6 production	-10.2789	-8.74971	33/164	116,351,961,1445,2069,2149,2150,3146,3553,3556,3569,3570,3586,4843,5336,5452,5724,5777,6774,7098,7128,7291,8915,9655,10417,11027,51284,54106,57506,64127,114609,114899,140885	ADCYAP1,APP,CD47,CSK,EREG,F2R,F2RL1,HMGB1,IL1B,IL1RAP,IL6,IL6R,IL10,NOS2,PLCG2,POU2F2,PTAFR,PTPN6,STAT3,TLR3,TNFAIP3,TWIST1,BCL10,SOCS5,SPON2,LILRA2,TLR7,TLR9,MAVS,NOD2,TIRAP,C1QTNF3,SIRPA
7_Member	GO Biological Processes	GO:0032677	regulation of interleukin-8 production	-9.10208	-7.66722	24/102	1991,2149,2150,2152,2867,3146,3304,3553,3569,3586,4843,5054,5861,6774,7098,8915,9370,11027,51284,54106,57506,58509,64127,114609	ELANE,F2R,F2RL1,F3,FFAR2,HMGB1,HSPA1B,IL1B,IL6,IL10,NOS2,SERPINE1,RAB1A,STAT3,TLR3,BCL10,ADIPOQ,LILRA2,TLR7,TLR9,MAVS,CACTIN,NOD2,TIRAP
7_Member	GO Biological Processes	GO:0001818	negative regulation of cytokine production	-9.02244	-7.59219	50/359	113,558,604,1445,1991,2150,2627,3146,3479,3569,3586,3624,4092,4790,5552,5621,5734,5777,5966,6556,7040,7128,7291,7528,7538,8986,9252,9308,9370,9655,9683,9971,10293,22900,23405,23512,23607,26146,27020,27242,54106,54941,55593,58509,59307,64127,90355,114899,140885,406985	ADCY7,AXL,BCL6,CSK,ELANE,F2RL1,GATA6,HMGB1,IGF1,IL6,IL10,INHBA,SMAD7,NFKB1,SRGN,PRNP,PTGER4,PTPN6,REL,SLC11A1,TGFB1,TNFAIP3,TWIST1,YY1,ZFP36,RPS6KA4,RPS6KA5,CD83,ADIPOQ,SOCS5,N4BP1,NR1H4,TRAIP,CARD8,DICER1,SUZ12,CD2AP,TRAF3IP1,NPTN,TNFRSF21,TLR9,RNF125,OTUD5,CACTIN,SIGIRR,NOD2,MACIR,C1QTNF3,SIRPA,MIR200C
7_Member	GO Biological Processes	GO:0032637	interleukin-8 production	-9.00959	-7.58187	24/103	1991,2149,2150,2152,2867,3146,3304,3553,3569,3586,4843,5054,5861,6774,7098,8915,9370,11027,51284,54106,57506,58509,64127,114609	ELANE,F2R,F2RL1,F3,FFAR2,HMGB1,HSPA1B,IL1B,IL6,IL10,NOS2,SERPINE1,RAB1A,STAT3,TLR3,BCL10,ADIPOQ,LILRA2,TLR7,TLR9,MAVS,CACTIN,NOD2,TIRAP
7_Member	GO Biological Processes	GO:0071706	tumor necrosis factor superfamily cytokine production	-8.78902	-7.37816	33/186	351,558,566,961,1191,3133,3146,3479,3569,3586,5336,5724,5777,5795,6774,7098,7128,7291,7538,8915,9370,9971,10417,10564,11027,23405,54106,57506,58509,64127,114609,140885,729230	APP,AXL,AZU1,CD47,CLU,HLA-E,HMGB1,IGF1,IL6,IL10,PLCG2,PTAFR,PTPN6,PTPRJ,STAT3,TLR3,TNFAIP3,TWIST1,ZFP36,BCL10,ADIPOQ,NR1H4,SPON2,ARFGEF2,LILRA2,DICER1,TLR9,MAVS,CACTIN,NOD2,TIRAP,SIRPA,CCR2
7_Member	GO Biological Processes	GO:1903555	regulation of tumor necrosis factor superfamily cytokine production	-8.78902	-7.37816	33/186	351,558,566,961,1191,3133,3146,3479,3569,3586,5336,5724,5777,5795,6774,7098,7128,7291,7538,8915,9370,9971,10417,10564,11027,23405,54106,57506,58509,64127,114609,140885,729230	APP,AXL,AZU1,CD47,CLU,HLA-E,HMGB1,IGF1,IL6,IL10,PLCG2,PTAFR,PTPN6,PTPRJ,STAT3,TLR3,TNFAIP3,TWIST1,ZFP36,BCL10,ADIPOQ,NR1H4,SPON2,ARFGEF2,LILRA2,DICER1,TLR9,MAVS,CACTIN,NOD2,TIRAP,SIRPA,CCR2
7_Member	GO Biological Processes	GO:0032640	tumor necrosis factor production	-8.5663	-7.17772	32/180	351,558,566,961,1191,3133,3146,3479,3569,3586,5336,5724,5777,5795,6774,7098,7128,7291,7538,9370,9971,10417,10564,11027,23405,54106,57506,58509,64127,114609,140885,729230	APP,AXL,AZU1,CD47,CLU,HLA-E,HMGB1,IGF1,IL6,IL10,PLCG2,PTAFR,PTPN6,PTPRJ,STAT3,TLR3,TNFAIP3,TWIST1,ZFP36,ADIPOQ,NR1H4,SPON2,ARFGEF2,LILRA2,DICER1,TLR9,MAVS,CACTIN,NOD2,TIRAP,SIRPA,CCR2
7_Member	GO Biological Processes	GO:0032680	regulation of tumor necrosis factor production	-8.5663	-7.17772	32/180	351,558,566,961,1191,3133,3146,3479,3569,3586,5336,5724,5777,5795,6774,7098,7128,7291,7538,9370,9971,10417,10564,11027,23405,54106,57506,58509,64127,114609,140885,729230	APP,AXL,AZU1,CD47,CLU,HLA-E,HMGB1,IGF1,IL6,IL10,PLCG2,PTAFR,PTPN6,PTPRJ,STAT3,TLR3,TNFAIP3,TWIST1,ZFP36,ADIPOQ,NR1H4,SPON2,ARFGEF2,LILRA2,DICER1,TLR9,MAVS,CACTIN,NOD2,TIRAP,SIRPA,CCR2
7_Member	GO Biological Processes	GO:0032609	interferon-gamma production	-6.88697	-5.63652	22/112	558,961,2150,3146,3265,3394,3553,3554,3586,3624,5621,6556,7098,7294,9971,10666,11126,51284,54106,64127,140885,729230	AXL,CD47,F2RL1,HMGB1,HRAS,IRF8,IL1B,IL1R1,IL10,INHBA,PRNP,SLC11A1,TLR3,TXK,NR1H4,CD226,CD160,TLR7,TLR9,NOD2,SIRPA,CCR2
7_Member	GO Biological Processes	GO:0032649	regulation of interferon-gamma production	-6.88697	-5.63652	22/112	558,961,2150,3146,3265,3394,3553,3554,3586,3624,5621,6556,7098,7294,9971,10666,11126,51284,54106,64127,140885,729230	AXL,CD47,F2RL1,HMGB1,HRAS,IRF8,IL1B,IL1R1,IL10,INHBA,PRNP,SLC11A1,TLR3,TXK,NR1H4,CD226,CD160,TLR7,TLR9,NOD2,SIRPA,CCR2
7_Member	GO Biological Processes	GO:1903557	positive regulation of tumor necrosis factor superfamily cytokine production	-6.66998	-5.43957	21/106	351,566,1191,3133,3146,3569,5336,5724,5795,6774,7098,7291,8915,10417,10564,11027,54106,57506,64127,114609,729230	APP,AZU1,CLU,HLA-E,HMGB1,IL6,PLCG2,PTAFR,PTPRJ,STAT3,TLR3,TWIST1,BCL10,SPON2,ARFGEF2,LILRA2,TLR9,MAVS,NOD2,TIRAP,CCR2
7_Member	GO Biological Processes	GO:0032760	positive regulation of tumor necrosis factor production	-6.30804	-5.11039	20/102	351,566,1191,3133,3146,3569,5336,5724,5795,6774,7098,7291,10417,10564,11027,54106,57506,64127,114609,729230	APP,AZU1,CLU,HLA-E,HMGB1,IL6,PLCG2,PTAFR,PTPRJ,STAT3,TLR3,TWIST1,SPON2,ARFGEF2,LILRA2,TLR9,MAVS,NOD2,TIRAP,CCR2
8_Summary	Reactome Gene Sets	R-HSA-5663202	Diseases of signal transduction by growth factor receptors and second messengers	-35.9417	-32.6214	101/433	60,102,182,207,324,471,572,685,805,815,867,940,1026,1027,1385,1445,1487,1488,1839,2069,2099,2100,2247,2252,2280,2308,2931,3092,3265,3516,3690,4067,4087,4089,4193,4478,4627,4851,4893,5155,5159,5170,5292,5293,5434,5500,5518,5573,5594,5686,5693,5702,5711,5713,5728,5880,6199,6233,6464,6774,6907,6934,7040,7048,7094,7171,7249,7316,7525,8074,8087,8322,8496,8826,8841,8850,9208,9372,9444,9451,9612,9648,98…	ACTB,ADAM10,JAG1,AKT1,APC,ATIC,BAD,BTC,CALM2,CAMK2A,CBL,CD28,CDKN1A,CDKN1B,CREB1,CSK,CTBP1,CTBP2,HBEGF,EREG,ESR1,ESR2,FGF2,FGF7,FKBP1A,FOXO1,GSK3A,HIP1,HRAS,RBPJ,ITGB3,LYN,SMAD2,SMAD4,MDM2,MSN,MYH9,NOTCH1,NRAS,PDGFB,PDGFRB,PDPK1,PIM1,PIK3CD,POLR2E,PPP1CB,PPP2R1A,PRKAR1A,MAPK1,PSMA5,PSMB5,PSMC3,PSMD5,PSMD7,PTEN,RAC2,RPS6KB2,RPS27A,SHC1,STAT3,TBL1X,TCF7L2,TGFB1,TGFBR2,TLN1,TPM4,TSC2,UBC,YES1,FGF23,…
8_Member	Reactome Gene Sets	R-HSA-5663202	Diseases of signal transduction by growth factor receptors and second messengers	-35.9417	-32.6214	101/433	60,102,182,207,324,471,572,685,805,815,867,940,1026,1027,1385,1445,1487,1488,1839,2069,2099,2100,2247,2252,2280,2308,2931,3092,3265,3516,3690,4067,4087,4089,4193,4478,4627,4851,4893,5155,5159,5170,5292,5293,5434,5500,5518,5573,5594,5686,5693,5702,5711,5713,5728,5880,6199,6233,6464,6774,6907,6934,7040,7048,7094,7171,7249,7316,7525,8074,8087,8322,8496,8826,8841,8850,9208,9372,9444,9451,9612,9648,98…	ACTB,ADAM10,JAG1,AKT1,APC,ATIC,BAD,BTC,CALM2,CAMK2A,CBL,CD28,CDKN1A,CDKN1B,CREB1,CSK,CTBP1,CTBP2,HBEGF,EREG,ESR1,ESR2,FGF2,FGF7,FKBP1A,FOXO1,GSK3A,HIP1,HRAS,RBPJ,ITGB3,LYN,SMAD2,SMAD4,MDM2,MSN,MYH9,NOTCH1,NRAS,PDGFB,PDGFRB,PDPK1,PIM1,PIK3CD,POLR2E,PPP1CB,PPP2R1A,PRKAR1A,MAPK1,PSMA5,PSMB5,PSMC3,PSMD5,PSMD7,PTEN,RAC2,RPS6KB2,RPS27A,SHC1,STAT3,TBL1X,TCF7L2,TGFB1,TGFBR2,TLN1,TPM4,TSC2,UBC,YES1,FGF23,…
8_Member	Reactome Gene Sets	R-HSA-5683057	MAPK family signaling cascades	-16.2567	-14.2788	60/325	60,685,805,815,1445,1839,1843,1844,1847,2069,2247,2252,2308,2902,3265,3569,3570,3572,3690,4747,4893,4902,5155,5159,5500,5518,5567,5594,5686,5693,5702,5711,5713,5979,6233,6300,6464,6712,7094,7316,7514,8074,8452,8550,8556,8682,8826,9693,9861,10197,10602,10642,10818,11221,22821,23112,80824,145957,153090,200734	ACTB,BTC,CALM2,CAMK2A,CSK,HBEGF,DUSP1,DUSP2,DUSP5,EREG,FGF2,FGF7,FOXO1,GRIN1,HRAS,IL6,IL6R,IL6ST,ITGB3,NEFL,NRAS,NRTN,PDGFB,PDGFRB,PPP1CB,PPP2R1A,PRKACB,MAPK1,PSMA5,PSMB5,PSMC3,PSMD5,PSMD7,RET,RPS27A,MAPK12,SHC1,SPTBN2,TLN1,UBC,XPO1,FGF23,CUL3,MAPKAPK5,CDC14A,PEA15,IQGAP1,RAPGEF2,PSMD6,PSME3,CDC42EP3,IGF2BP1,FRS2,DUSP10,RASA3,TNRC6B,DUSP16,NRG4,DAB2IP,SPRED2
8_Member	Reactome Gene Sets	R-HSA-5684996	MAPK1/MAPK3 signaling	-13.8952	-12.0886	52/286	60,685,805,815,1445,1839,1843,1844,1847,2069,2247,2252,2902,3265,3569,3570,3572,3690,4747,4893,4902,5155,5159,5500,5518,5594,5686,5693,5702,5711,5713,5979,6233,6300,6464,6712,7094,7316,8074,8452,8682,8826,9693,9861,10197,10818,11221,22821,80824,145957,153090,200734	ACTB,BTC,CALM2,CAMK2A,CSK,HBEGF,DUSP1,DUSP2,DUSP5,EREG,FGF2,FGF7,GRIN1,HRAS,IL6,IL6R,IL6ST,ITGB3,NEFL,NRAS,NRTN,PDGFB,PDGFRB,PPP1CB,PPP2R1A,MAPK1,PSMA5,PSMB5,PSMC3,PSMD5,PSMD7,RET,RPS27A,MAPK12,SHC1,SPTBN2,TLN1,UBC,FGF23,CUL3,PEA15,IQGAP1,RAPGEF2,PSMD6,PSME3,FRS2,DUSP10,RASA3,DUSP16,NRG4,DAB2IP,SPRED2
8_Member	Reactome Gene Sets	R-HSA-5673001	RAF/MAP kinase cascade	-12.4798	-10.777	49/280	60,685,805,815,1445,1839,1843,1844,1847,2069,2247,2252,2902,3265,3690,4747,4893,4902,5155,5159,5500,5518,5594,5686,5693,5702,5711,5713,5979,6233,6300,6464,6712,7094,7316,8074,8452,8682,8826,9693,9861,10197,10818,11221,22821,80824,145957,153090,200734	ACTB,BTC,CALM2,CAMK2A,CSK,HBEGF,DUSP1,DUSP2,DUSP5,EREG,FGF2,FGF7,GRIN1,HRAS,ITGB3,NEFL,NRAS,NRTN,PDGFB,PDGFRB,PPP1CB,PPP2R1A,MAPK1,PSMA5,PSMB5,PSMC3,PSMD5,PSMD7,RET,RPS27A,MAPK12,SHC1,SPTBN2,TLN1,UBC,FGF23,CUL3,PEA15,IQGAP1,RAPGEF2,PSMD6,PSME3,FRS2,DUSP10,RASA3,DUSP16,NRG4,DAB2IP,SPRED2
8_Member	Reactome Gene Sets	R-HSA-6802957	Oncogenic MAPK signaling	-6.33933	-5.13988	18/84	60,805,815,1445,3265,3690,4893,5500,5594,7094,8087,8826,9444,10018,10533,11221,80824,200734	ACTB,CALM2,CAMK2A,CSK,HRAS,ITGB3,NRAS,PPP1CB,MAPK1,TLN1,FXR1,IQGAP1,QKI,BCL2L11,ATG7,DUSP10,DUSP16,SPRED2
9_Summary	GO Biological Processes	GO:0043549	regulation of kinase activity	-34.6735	-31.4258	136/764	60,103,116,207,324,351,493,558,566,572,595,641,650,657,659,685,805,857,867,894,898,900,904,975,993,1026,1027,1029,1032,1191,1436,1445,1616,1654,1815,1839,1843,1855,1894,1915,1917,1958,1991,2069,2081,2180,2247,2776,2810,3146,3265,3479,3480,3481,3553,3570,3611,3619,3654,3690,3937,4058,4067,4221,4298,4486,4683,4771,4914,5155,5159,5170,5208,5310,5468,5573,5621,5728,5777,5795,5925,5979,6176,6352,6464,…	ACTB,ADAR,ADCYAP1,AKT1,APC,APP,ATP2B4,AXL,AZU1,BAD,CCND1,BLM,BMP2,BMPR1A,BMPR2,BTC,CALM2,CAV1,CBL,CCND2,CCNE1,CCNG1,CCNT1,CD81,CDC25A,CDKN1A,CDKN1B,CDKN2A,CDKN2D,CLU,CSF1R,CSK,DAXX,DDX3X,DRD4,HBEGF,DUSP1,DVL1,ECT2,EEF1A1,EEF1A2,EGR1,ELANE,EREG,ERN1,ACSL1,FGF2,GNAQ,SFN,HMGB1,HRAS,IGF1,IGF1R,IGF2,IL1B,IL6R,ILK,INCENP,IRAK1,ITGB3,LCP2,LTK,LYN,MEN1,MLLT1,MST1R,NBN,NF2,NTRK1,PDGFB,PDGFRB,PDPK1,PFKFB2,…
9_Member	GO Biological Processes	GO:0043549	regulation of kinase activity	-34.6735	-31.4258	136/764	60,103,116,207,324,351,493,558,566,572,595,641,650,657,659,685,805,857,867,894,898,900,904,975,993,1026,1027,1029,1032,1191,1436,1445,1616,1654,1815,1839,1843,1855,1894,1915,1917,1958,1991,2069,2081,2180,2247,2776,2810,3146,3265,3479,3480,3481,3553,3570,3611,3619,3654,3690,3937,4058,4067,4221,4298,4486,4683,4771,4914,5155,5159,5170,5208,5310,5468,5573,5621,5728,5777,5795,5925,5979,6176,6352,6464,…	ACTB,ADAR,ADCYAP1,AKT1,APC,APP,ATP2B4,AXL,AZU1,BAD,CCND1,BLM,BMP2,BMPR1A,BMPR2,BTC,CALM2,CAV1,CBL,CCND2,CCNE1,CCNG1,CCNT1,CD81,CDC25A,CDKN1A,CDKN1B,CDKN2A,CDKN2D,CLU,CSF1R,CSK,DAXX,DDX3X,DRD4,HBEGF,DUSP1,DVL1,ECT2,EEF1A1,EEF1A2,EGR1,ELANE,EREG,ERN1,ACSL1,FGF2,GNAQ,SFN,HMGB1,HRAS,IGF1,IGF1R,IGF2,IL1B,IL6R,ILK,INCENP,IRAK1,ITGB3,LCP2,LTK,LYN,MEN1,MLLT1,MST1R,NBN,NF2,NTRK1,PDGFB,PDGFRB,PDPK1,PFKFB2,…
9_Member	GO Biological Processes	GO:0045859	regulation of protein kinase activity	-33.081	-29.8654	121/645	60,103,116,207,324,351,493,566,595,641,650,657,659,685,805,857,867,894,898,900,904,993,1026,1027,1029,1032,1191,1436,1445,1616,1654,1815,1839,1843,1855,1894,1958,1991,2069,2081,2180,2247,2776,2810,3146,3265,3479,3481,3553,3570,3611,3619,3654,3690,3937,4067,4221,4298,4486,4771,5155,5159,5170,5310,5468,5573,5621,5728,5777,5795,5925,6176,6352,6464,6556,6788,6789,7040,7048,7098,7128,7248,7249,7422,74…	ACTB,ADAR,ADCYAP1,AKT1,APC,APP,ATP2B4,AZU1,CCND1,BLM,BMP2,BMPR1A,BMPR2,BTC,CALM2,CAV1,CBL,CCND2,CCNE1,CCNG1,CCNT1,CDC25A,CDKN1A,CDKN1B,CDKN2A,CDKN2D,CLU,CSF1R,CSK,DAXX,DDX3X,DRD4,HBEGF,DUSP1,DVL1,ECT2,EGR1,ELANE,EREG,ERN1,ACSL1,FGF2,GNAQ,SFN,HMGB1,HRAS,IGF1,IGF2,IL1B,IL6R,ILK,INCENP,IRAK1,ITGB3,LCP2,LYN,MEN1,MLLT1,MST1R,NF2,PDGFB,PDGFRB,PDPK1,PKD1,PPARG,PRKAR1A,PRNP,PTEN,PTPN6,PTPRJ,RB1,RPLP1,CCL…
9_Member	GO Biological Processes	GO:0001934	positive regulation of protein phosphorylation	-33.0221	-29.8365	130/732	91,116,207,351,355,493,551,566,595,596,650,656,657,659,685,805,857,894,904,960,975,1026,1027,1191,1389,1399,1436,1445,1453,1616,1654,1815,1839,1855,1894,1958,1991,2069,2081,2180,2247,2252,2931,3146,3265,3383,3479,3481,3553,3569,3570,3572,3600,3611,3619,3624,3654,3690,3937,4067,4089,4486,4683,4914,5155,5159,5170,5300,5310,5336,5468,5594,5621,5795,5979,6176,6352,6416,6556,6788,6789,7037,7040,7048,7…	ACVR1B,ADCYAP1,AKT1,APP,FAS,ATP2B4,AVP,AZU1,CCND1,BCL2,BMP2,BMP8B,BMPR1A,BMPR2,BTC,CALM2,CAV1,CCND2,CCNT1,CD44,CD81,CDKN1A,CDKN1B,CLU,CREBL2,CRKL,CSF1R,CSK,CSNK1D,DAXX,DDX3X,DRD4,HBEGF,DVL1,ECT2,EGR1,ELANE,EREG,ERN1,ACSL1,FGF2,FGF7,GSK3A,HMGB1,HRAS,ICAM1,IGF1,IGF2,IL1B,IL6,IL6R,IL6ST,IL15,ILK,INCENP,INHBA,IRAK1,ITGB3,LCP2,LYN,SMAD4,MST1R,NBN,NTRK1,PDGFB,PDGFRB,PDPK1,PIN1,PKD1,PLCG2,PPARG,MAPK1,PR…
9_Member	GO Biological Processes	GO:0000165	MAPK cascade	-32.203	-29.1423	133/775	116,207,351,355,367,551,553,650,857,960,975,1230,1399,1432,1436,1445,1815,1843,1847,1880,1991,2081,2149,2150,2247,2308,2771,3146,3265,3340,3383,3479,3480,3481,3553,3569,3611,3654,3685,3735,4067,4089,4214,4221,4281,4293,4486,4771,4790,4851,4853,4893,4902,4914,5027,5048,5155,5159,5300,5322,5336,5468,5500,5578,5594,5600,5601,5728,5734,5777,5795,5979,6300,6352,6356,6416,6464,6688,6788,6789,6815,7001,…	ADCYAP1,AKT1,APP,FAS,AR,AVP,AVPR1B,BMP2,CAV1,CD44,CD81,CCR1,CRKL,MAPK14,CSF1R,CSK,DRD4,DUSP1,DUSP5,GPR183,ELANE,ERN1,F2R,F2RL1,FGF2,FOXO1,GNAI2,HMGB1,HRAS,NDST1,ICAM1,IGF1,IGF1R,IGF2,IL1B,IL6,ILK,IRAK1,ITGAV,KARS1,LYN,SMAD4,MAP3K1,MEN1,MID1,MAP3K9,MST1R,NF2,NFKB1,NOTCH1,NOTCH2,NRAS,NRTN,NTRK1,P2RX7,PAFAH1B1,PDGFB,PDGFRB,PIN1,PLA2G5,PLCG2,PPARG,PPP1CB,PRKCA,MAPK1,MAPK11,MAPK9,PTEN,PTGER4,PTPN6,PTP…
9_Member	GO Biological Processes	GO:0051347	positive regulation of transferase activity	-27.2388	-24.5003	103/563	116,207,493,558,566,572,595,648,650,657,659,685,805,894,904,975,1026,1027,1191,1436,1445,1616,1654,1815,1839,1894,1917,1958,1991,2069,2081,2180,2247,2931,3146,3150,3265,3479,3480,3481,3553,3570,3611,3619,3654,3690,3937,4058,4067,4486,4683,4914,5155,5159,5170,5208,5300,5310,5594,5621,5728,5979,6176,6352,6556,6788,6789,7040,7048,7098,7301,7329,7334,7410,7422,7436,7786,7804,8322,8550,8795,8826,8851,…	ADCYAP1,AKT1,ATP2B4,AXL,AZU1,BAD,CCND1,BMI1,BMP2,BMPR1A,BMPR2,BTC,CALM2,CCND2,CCNT1,CD81,CDKN1A,CDKN1B,CLU,CSF1R,CSK,DAXX,DDX3X,DRD4,HBEGF,ECT2,EEF1A2,EGR1,ELANE,EREG,ERN1,ACSL1,FGF2,GSK3A,HMGB1,HMGN1,HRAS,IGF1,IGF1R,IGF2,IL1B,IL6R,ILK,INCENP,IRAK1,ITGB3,LCP2,LTK,LYN,MST1R,NBN,NTRK1,PDGFB,PDGFRB,PDPK1,PFKFB2,PIN1,PKD1,MAPK1,PRNP,PTEN,RET,RPLP1,CCL5,SLC11A1,STK3,STK4,TGFB1,TGFBR2,TLR3,TYRO3,UBE2I,…
9_Member	GO Biological Processes	GO:0033674	positive regulation of kinase activity	-25.8931	-23.2215	92/480	116,207,493,558,566,572,595,650,657,659,685,805,894,904,975,1026,1027,1191,1436,1445,1616,1654,1815,1839,1894,1917,1958,1991,2069,2081,2180,2247,3146,3265,3479,3480,3481,3553,3570,3611,3619,3654,3690,3937,4058,4067,4486,4683,4914,5155,5159,5170,5208,5310,5621,5979,6176,6352,6556,6788,6789,7040,7048,7098,7301,7410,7422,7436,7786,7804,8322,8795,8826,8851,8915,9370,9693,11331,23411,29990,30849,50488…	ADCYAP1,AKT1,ATP2B4,AXL,AZU1,BAD,CCND1,BMP2,BMPR1A,BMPR2,BTC,CALM2,CCND2,CCNT1,CD81,CDKN1A,CDKN1B,CLU,CSF1R,CSK,DAXX,DDX3X,DRD4,HBEGF,ECT2,EEF1A2,EGR1,ELANE,EREG,ERN1,ACSL1,FGF2,HMGB1,HRAS,IGF1,IGF1R,IGF2,IL1B,IL6R,ILK,INCENP,IRAK1,ITGB3,LCP2,LTK,LYN,MST1R,NBN,NTRK1,PDGFB,PDGFRB,PDPK1,PFKFB2,PKD1,PRNP,RET,RPLP1,CCL5,SLC11A1,STK3,STK4,TGFB1,TGFBR2,TLR3,TYRO3,VAV2,VEGFA,VLDLR,MAP3K12,LRP8,FZD4,TNFR…
9_Member	GO Biological Processes	GO:0043408	regulation of MAPK cascade	-24.1888	-21.6194	109/674	116,207,351,355,367,553,650,857,960,975,1230,1399,1436,1445,1815,1843,1880,1991,2081,2149,2150,2247,2308,2771,3146,3265,3340,3383,3479,3480,3481,3553,3569,3611,3654,4067,4089,4221,4281,4486,4771,4851,4853,4914,5027,5048,5155,5159,5300,5322,5336,5468,5578,5594,5728,5777,5795,5979,6352,6356,6464,6688,6788,6789,6815,7001,7040,7077,7098,7185,7187,7422,7534,7786,8074,8322,8482,8826,8841,9043,9370,9693…	ADCYAP1,AKT1,APP,FAS,AR,AVPR1B,BMP2,CAV1,CD44,CD81,CCR1,CRKL,CSF1R,CSK,DRD4,DUSP1,GPR183,ELANE,ERN1,F2R,F2RL1,FGF2,FOXO1,GNAI2,HMGB1,HRAS,NDST1,ICAM1,IGF1,IGF1R,IGF2,IL1B,IL6,ILK,IRAK1,LYN,SMAD4,MEN1,MID1,MST1R,NF2,NOTCH1,NOTCH2,NTRK1,P2RX7,PAFAH1B1,PDGFB,PDGFRB,PIN1,PLA2G5,PLCG2,PPARG,PRKCA,MAPK1,PTEN,PTPN6,PTPRJ,RET,CCL5,CCL11,SHC1,SPI1,STK3,STK4,STYX,PRDX2,TGFB1,TIMP2,TLR3,TRAF1,TRAF3,VEGFA,YW…
9_Member	GO Biological Processes	GO:0071900	regulation of protein serine/threonine kinase activity	-23.7071	-21.1714	76/366	60,207,324,493,595,641,650,657,659,805,857,894,898,900,904,993,1026,1027,1029,1032,1436,1445,1654,1815,1843,1991,2081,2180,2247,2810,3265,3481,3553,3611,3619,3654,4067,4221,4486,5155,5159,5310,5468,5573,5728,5777,5795,5925,6788,6789,7040,7128,7422,7786,8322,8826,8850,8851,9370,9555,9693,10019,10114,11221,11329,23411,51719,54106,54900,54956,57761,64127,153090,171392,219771,253260	ACTB,AKT1,APC,ATP2B4,CCND1,BLM,BMP2,BMPR1A,BMPR2,CALM2,CAV1,CCND2,CCNE1,CCNG1,CCNT1,CDC25A,CDKN1A,CDKN1B,CDKN2A,CDKN2D,CSF1R,CSK,DDX3X,DRD4,DUSP1,ELANE,ERN1,ACSL1,FGF2,SFN,HRAS,IGF2,IL1B,ILK,INCENP,IRAK1,LYN,MEN1,MST1R,PDGFB,PDGFRB,PKD1,PPARG,PRKAR1A,PTEN,PTPN6,PTPRJ,RB1,STK3,STK4,TGFB1,TNFAIP3,VEGFA,MAP3K12,FZD4,IQGAP1,KAT2B,CDK5R1,ADIPOQ,MACROH2A1,RAPGEF2,SH2B3,HIPK3,DUSP10,STK38,SIRT1,CAB39,TL…
9_Member	GO Biological Processes	GO:0045860	positive regulation of protein kinase activity	-21.928	-19.5254	77/399	116,207,493,566,595,650,657,659,685,805,894,904,1026,1027,1191,1436,1445,1616,1654,1815,1839,1894,1958,1991,2069,2081,2180,2247,3146,3265,3479,3481,3553,3570,3611,3619,3654,3690,3937,4486,5155,5159,5170,5310,5621,6176,6352,6556,6788,6789,7040,7048,7098,7422,7436,7786,7804,8322,8795,8826,8851,9370,9693,11331,23411,29990,50488,51719,54106,54956,64127,65125,80829,114609,153090,219771,253260	ADCYAP1,AKT1,ATP2B4,AZU1,CCND1,BMP2,BMPR1A,BMPR2,BTC,CALM2,CCND2,CCNT1,CDKN1A,CDKN1B,CLU,CSF1R,CSK,DAXX,DDX3X,DRD4,HBEGF,ECT2,EGR1,ELANE,EREG,ERN1,ACSL1,FGF2,HMGB1,HRAS,IGF1,IGF2,IL1B,IL6R,ILK,INCENP,IRAK1,ITGB3,LCP2,MST1R,PDGFB,PDGFRB,PDPK1,PKD1,PRNP,RPLP1,CCL5,SLC11A1,STK3,STK4,TGFB1,TGFBR2,TLR3,VEGFA,VLDLR,MAP3K12,LRP8,FZD4,TNFRSF10B,IQGAP1,CDK5R1,ADIPOQ,RAPGEF2,PHB2,SIRT1,PILRB,MINK1,CAB39,TL…
9_Member	GO Biological Processes	GO:0070371	ERK1 and ERK2 cascade	-16.0923	-14.1268	61/337	116,351,551,650,960,1230,1399,1436,1445,1843,1880,2149,2150,2247,2771,3146,3265,3383,3479,3553,3685,3735,4067,4089,4851,4853,4914,5155,5159,5300,5322,5578,5594,5728,5734,5777,6352,6356,6464,6815,7040,7534,7786,8074,8482,9370,9693,10347,10818,11221,11331,27020,27330,64127,114609,140885,153090,200734,255743,374403,406985	ADCYAP1,APP,AVP,BMP2,CD44,CCR1,CRKL,CSF1R,CSK,DUSP1,GPR183,F2R,F2RL1,FGF2,GNAI2,HMGB1,HRAS,ICAM1,IGF1,IL1B,ITGAV,KARS1,LYN,SMAD4,NOTCH1,NOTCH2,NTRK1,PDGFB,PDGFRB,PIN1,PLA2G5,PRKCA,MAPK1,PTEN,PTGER4,PTPN6,CCL5,CCL11,SHC1,STYX,TGFB1,YWHAZ,MAP3K12,FGF23,SEMA7A,ADIPOQ,RAPGEF2,ABCA7,FRS2,DUSP10,PHB2,NPTN,RPS6KA6,NOD2,TIRAP,SIRPA,DAB2IP,SPRED2,NPNT,TBC1D10C,MIR200C
9_Member	GO Biological Processes	GO:0071902	positive regulation of protein serine/threonine kinase activity	-15.9515	-13.9963	46/205	207,493,595,650,657,659,805,894,904,1027,1436,1445,1654,1815,1991,2081,2180,2247,3265,3481,3553,3611,3619,3654,4486,5155,5159,5310,6788,6789,7040,7422,7786,8322,8826,8851,9370,9693,23411,51719,54106,54956,64127,153090,219771,253260	AKT1,ATP2B4,CCND1,BMP2,BMPR1A,BMPR2,CALM2,CCND2,CCNT1,CDKN1B,CSF1R,CSK,DDX3X,DRD4,ELANE,ERN1,ACSL1,FGF2,HRAS,IGF2,IL1B,ILK,INCENP,IRAK1,MST1R,PDGFB,PDGFRB,PKD1,STK3,STK4,TGFB1,VEGFA,MAP3K12,FZD4,IQGAP1,CDK5R1,ADIPOQ,RAPGEF2,SIRT1,CAB39,TLR9,PARP16,NOD2,DAB2IP,CCNY,RICTOR
9_Member	GO Biological Processes	GO:0043410	positive regulation of MAPK cascade	-15.8681	-13.918	75/481	116,351,367,553,650,960,975,1230,1399,1436,1445,1815,1880,1991,2081,2149,2150,2247,2771,3146,3265,3340,3383,3479,3480,3481,3553,3569,3611,3654,4281,4486,4851,4853,4914,5155,5159,5322,5336,5578,5728,5795,5979,6352,6356,6464,6688,6788,7001,7040,7077,7098,7185,7187,7422,7786,8074,8322,8482,8826,9043,9693,10347,10818,11331,22881,27020,50488,51196,54106,54910,64127,114609,153090,255743	ADCYAP1,APP,AR,AVPR1B,BMP2,CD44,CD81,CCR1,CRKL,CSF1R,CSK,DRD4,GPR183,ELANE,ERN1,F2R,F2RL1,FGF2,GNAI2,HMGB1,HRAS,NDST1,ICAM1,IGF1,IGF1R,IGF2,IL1B,IL6,ILK,IRAK1,MID1,MST1R,NOTCH1,NOTCH2,NTRK1,PDGFB,PDGFRB,PLA2G5,PLCG2,PRKCA,PTEN,PTPRJ,RET,CCL5,CCL11,SHC1,SPI1,STK3,PRDX2,TGFB1,TIMP2,TLR3,TRAF1,TRAF3,VEGFA,MAP3K12,FGF23,FZD4,SEMA7A,IQGAP1,SPAG9,RAPGEF2,ABCA7,FRS2,PHB2,ANKRD6,NPTN,MINK1,PLCE1,TLR9,SEM…
9_Member	GO Biological Processes	GO:0070372	regulation of ERK1 and ERK2 cascade	-14.4728	-12.6243	56/315	116,351,650,960,1230,1399,1436,1445,1843,1880,2149,2150,2247,2771,3146,3265,3383,3479,3553,4067,4089,4851,4853,4914,5155,5159,5300,5322,5578,5728,5777,6352,6356,6464,6815,7040,7534,7786,8074,8482,9370,9693,10347,10818,11221,11331,27020,27330,64127,114609,140885,153090,200734,255743,374403,406985	ADCYAP1,APP,BMP2,CD44,CCR1,CRKL,CSF1R,CSK,DUSP1,GPR183,F2R,F2RL1,FGF2,GNAI2,HMGB1,HRAS,ICAM1,IGF1,IL1B,LYN,SMAD4,NOTCH1,NOTCH2,NTRK1,PDGFB,PDGFRB,PIN1,PLA2G5,PRKCA,PTEN,PTPN6,CCL5,CCL11,SHC1,STYX,TGFB1,YWHAZ,MAP3K12,FGF23,SEMA7A,ADIPOQ,RAPGEF2,ABCA7,FRS2,DUSP10,PHB2,NPTN,RPS6KA6,NOD2,TIRAP,SIRPA,DAB2IP,SPRED2,NPNT,TBC1D10C,MIR200C
9_Member	GO Biological Processes	GO:0043405	regulation of MAP kinase activity	-10.3495	-8.81061	35/181	650,857,1445,1815,1843,1991,2081,2247,3265,3553,3611,3654,4067,4486,5155,5159,5468,5777,5795,7040,7422,7786,8322,8826,9370,10019,10114,11221,11329,54106,54900,57761,64127,153090,171392	BMP2,CAV1,CSK,DRD4,DUSP1,ELANE,ERN1,FGF2,HRAS,IL1B,ILK,IRAK1,LYN,MST1R,PDGFB,PDGFRB,PPARG,PTPN6,PTPRJ,TGFB1,VEGFA,MAP3K12,FZD4,IQGAP1,ADIPOQ,SH2B3,HIPK3,DUSP10,STK38,TLR9,LAX1,TRIB3,NOD2,DAB2IP,ZNF675
9_Member	GO Biological Processes	GO:0070374	positive regulation of ERK1 and ERK2 cascade	-9.60407	-8.12602	38/221	116,351,650,960,1230,1399,1436,1880,2149,2150,2247,2771,3146,3265,3383,3479,4851,4853,4914,5155,5159,5322,5578,5728,6352,6356,6464,7040,7786,8074,8482,9693,10347,11331,27020,64127,114609,255743	ADCYAP1,APP,BMP2,CD44,CCR1,CRKL,CSF1R,GPR183,F2R,F2RL1,FGF2,GNAI2,HMGB1,HRAS,ICAM1,IGF1,NOTCH1,NOTCH2,NTRK1,PDGFB,PDGFRB,PLA2G5,PRKCA,PTEN,CCL5,CCL11,SHC1,TGFB1,MAP3K12,FGF23,SEMA7A,RAPGEF2,ABCA7,PHB2,NPTN,NOD2,TIRAP,NPNT
9_Member	GO Biological Processes	GO:0043406	positive regulation of MAP kinase activity	-5.51463	-4.39918	20/114	1445,1815,1991,2081,2247,3265,3553,3611,3654,4486,5155,5159,7040,7422,7786,8322,8826,54106,64127,153090	CSK,DRD4,ELANE,ERN1,FGF2,HRAS,IL1B,ILK,IRAK1,MST1R,PDGFB,PDGFRB,TGFB1,VEGFA,MAP3K12,FZD4,IQGAP1,TLR9,NOD2,DAB2IP
10_Summary	GO Biological Processes	GO:0030335	positive regulation of cell migration	-32.8662	-29.7086	111/556	81,91,102,207,324,351,389,472,506,538,596,650,659,811,857,949,961,1012,1230,1235,1398,1399,1432,1436,1613,1729,1839,1907,2149,2150,2152,2247,2252,2523,2771,3037,3091,3146,3265,3383,3479,3480,3553,3554,3569,3570,3611,3655,3673,3675,3685,3688,3690,3934,4067,4162,4193,4851,5054,5155,5159,5170,5293,5328,5336,5420,5578,5594,5641,5724,5880,5979,6239,6352,6356,6608,6648,6678,6688,6774,6789,6810,7040,704…	ACTN4,ACVR1B,ADAM10,AKT1,APC,APP,RHOC,ATM,ATP5F1B,ATP7A,BCL2,BMP2,BMPR2,CALR,CAV1,SCARB1,CD47,CDH13,CCR1,CCR6,CRK,CRKL,MAPK14,CSF1R,DAPK3,DIAPH1,HBEGF,EDN2,F2R,F2RL1,F3,FGF2,FGF7,FUT1,GNAI2,HAS2,HIF1A,HMGB1,HRAS,ICAM1,IGF1,IGF1R,IL1B,IL1R1,IL6,IL6R,ILK,ITGA6,ITGA2,ITGA3,ITGAV,ITGB1,ITGB3,LCN2,LYN,MCAM,MDM2,NOTCH1,SERPINE1,PDGFB,PDGFRB,PDPK1,PIK3CD,PLAU,PLCG2,PODXL,PRKCA,MAPK1,LGMN,PTAFR,RAC2,RET,…
10_Member	GO Biological Processes	GO:0030335	positive regulation of cell migration	-32.8662	-29.7086	111/556	81,91,102,207,324,351,389,472,506,538,596,650,659,811,857,949,961,1012,1230,1235,1398,1399,1432,1436,1613,1729,1839,1907,2149,2150,2152,2247,2252,2523,2771,3037,3091,3146,3265,3383,3479,3480,3553,3554,3569,3570,3611,3655,3673,3675,3685,3688,3690,3934,4067,4162,4193,4851,5054,5155,5159,5170,5293,5328,5336,5420,5578,5594,5641,5724,5880,5979,6239,6352,6356,6608,6648,6678,6688,6774,6789,6810,7040,704…	ACTN4,ACVR1B,ADAM10,AKT1,APC,APP,RHOC,ATM,ATP5F1B,ATP7A,BCL2,BMP2,BMPR2,CALR,CAV1,SCARB1,CD47,CDH13,CCR1,CCR6,CRK,CRKL,MAPK14,CSF1R,DAPK3,DIAPH1,HBEGF,EDN2,F2R,F2RL1,F3,FGF2,FGF7,FUT1,GNAI2,HAS2,HIF1A,HMGB1,HRAS,ICAM1,IGF1,IGF1R,IL1B,IL1R1,IL6,IL6R,ILK,ITGA6,ITGA2,ITGA3,ITGAV,ITGB1,ITGB3,LCN2,LYN,MCAM,MDM2,NOTCH1,SERPINE1,PDGFB,PDGFRB,PDPK1,PIK3CD,PLAU,PLCG2,PODXL,PRKCA,MAPK1,LGMN,PTAFR,RAC2,RET,…
10_Member	GO Biological Processes	GO:2000147	positive regulation of cell motility	-32.2994	-29.1715	113/582	81,91,102,207,324,351,389,472,506,538,596,650,659,811,857,949,961,1012,1230,1235,1398,1399,1432,1436,1613,1729,1839,1907,2149,2150,2152,2247,2252,2523,2771,3037,3091,3146,3265,3383,3479,3480,3553,3554,3569,3570,3611,3655,3673,3675,3685,3688,3690,3934,4067,4162,4193,4851,5054,5155,5159,5170,5293,5328,5336,5420,5578,5594,5641,5724,5880,5979,6239,6352,6356,6608,6648,6678,6688,6774,6789,6810,7040,704…	ACTN4,ACVR1B,ADAM10,AKT1,APC,APP,RHOC,ATM,ATP5F1B,ATP7A,BCL2,BMP2,BMPR2,CALR,CAV1,SCARB1,CD47,CDH13,CCR1,CCR6,CRK,CRKL,MAPK14,CSF1R,DAPK3,DIAPH1,HBEGF,EDN2,F2R,F2RL1,F3,FGF2,FGF7,FUT1,GNAI2,HAS2,HIF1A,HMGB1,HRAS,ICAM1,IGF1,IGF1R,IL1B,IL1R1,IL6,IL6R,ILK,ITGA6,ITGA2,ITGA3,ITGAV,ITGB1,ITGB3,LCN2,LYN,MCAM,MDM2,NOTCH1,SERPINE1,PDGFB,PDGFRB,PDPK1,PIK3CD,PLAU,PLCG2,PODXL,PRKCA,MAPK1,LGMN,PTAFR,RAC2,RET,…
10_Member	GO Biological Processes	GO:0051272	positive regulation of cellular component movement	-32.1027	-29.0835	114/594	81,91,102,207,324,351,389,472,506,538,596,604,650,659,811,857,949,961,1012,1230,1235,1398,1399,1432,1436,1613,1729,1839,1907,2149,2150,2152,2247,2252,2523,2771,3037,3091,3146,3265,3383,3479,3480,3553,3554,3569,3570,3611,3655,3673,3675,3685,3688,3690,3934,4067,4162,4193,4851,5054,5155,5159,5170,5293,5328,5336,5420,5578,5594,5641,5724,5880,5979,6239,6352,6356,6608,6648,6678,6688,6774,6789,6810,7040…	ACTN4,ACVR1B,ADAM10,AKT1,APC,APP,RHOC,ATM,ATP5F1B,ATP7A,BCL2,BCL6,BMP2,BMPR2,CALR,CAV1,SCARB1,CD47,CDH13,CCR1,CCR6,CRK,CRKL,MAPK14,CSF1R,DAPK3,DIAPH1,HBEGF,EDN2,F2R,F2RL1,F3,FGF2,FGF7,FUT1,GNAI2,HAS2,HIF1A,HMGB1,HRAS,ICAM1,IGF1,IGF1R,IL1B,IL1R1,IL6,IL6R,ILK,ITGA6,ITGA2,ITGA3,ITGAV,ITGB1,ITGB3,LCN2,LYN,MCAM,MDM2,NOTCH1,SERPINE1,PDGFB,PDGFRB,PDPK1,PIK3CD,PLAU,PLCG2,PODXL,PRKCA,MAPK1,LGMN,PTAFR,RAC2…
10_Member	GO Biological Processes	GO:0040017	positive regulation of locomotion	-31.9633	-28.987	114/596	81,91,102,207,324,351,389,472,506,538,566,596,650,659,811,857,949,961,1012,1230,1235,1398,1399,1432,1436,1613,1729,1839,1907,2149,2150,2152,2247,2252,2523,2771,3037,3091,3146,3265,3383,3479,3480,3553,3554,3569,3570,3611,3655,3673,3675,3685,3688,3690,3934,4067,4162,4193,4851,5054,5155,5159,5170,5293,5328,5336,5420,5578,5594,5641,5724,5880,5979,6239,6352,6356,6608,6648,6678,6688,6774,6789,6810,7040…	ACTN4,ACVR1B,ADAM10,AKT1,APC,APP,RHOC,ATM,ATP5F1B,ATP7A,AZU1,BCL2,BMP2,BMPR2,CALR,CAV1,SCARB1,CD47,CDH13,CCR1,CCR6,CRK,CRKL,MAPK14,CSF1R,DAPK3,DIAPH1,HBEGF,EDN2,F2R,F2RL1,F3,FGF2,FGF7,FUT1,GNAI2,HAS2,HIF1A,HMGB1,HRAS,ICAM1,IGF1,IGF1R,IL1B,IL1R1,IL6,IL6R,ILK,ITGA6,ITGA2,ITGA3,ITGAV,ITGB1,ITGB3,LCN2,LYN,MCAM,MDM2,NOTCH1,SERPINE1,PDGFB,PDGFRB,PDPK1,PIK3CD,PLAU,PLCG2,PODXL,PRKCA,MAPK1,LGMN,PTAFR,RAC2…
10_Member	GO Biological Processes	GO:0006935	chemotaxis	-23.3935	-20.8891	101/607	102,214,351,566,659,811,1012,1230,1232,1235,1385,1398,1399,1432,1436,1808,1839,1843,1855,1880,1907,1948,1991,2150,2152,2247,2252,2867,3146,3148,3265,3269,3569,3570,3586,3673,3685,3689,3690,3913,4046,4067,4089,4354,4756,4781,4804,4851,4853,4914,5054,5155,5159,5293,5328,5594,5641,5724,5795,5872,5880,5979,6152,6352,6356,6608,6688,6810,7040,7204,7226,7249,7422,7473,7869,8061,8398,8482,8851,9097,9252,…	ADAM10,ALCAM,APP,AZU1,BMPR2,CALR,CDH13,CCR1,CCR3,CCR6,CREB1,CRK,CRKL,MAPK14,CSF1R,DPYSL2,HBEGF,DUSP1,DVL1,GPR183,EDN2,EFNB2,ELANE,F2RL1,F3,FGF2,FGF7,FFAR2,HMGB1,HMGB2,HRAS,HRH1,IL6,IL6R,IL10,ITGA2,ITGAV,ITGB2,ITGB3,LAMB2,LSP1,LYN,SMAD4,MPP1,NEO1,NFIB,NGFR,NOTCH1,NOTCH2,NTRK1,SERPINE1,PDGFB,PDGFRB,PIK3CD,PLAU,MAPK1,LGMN,PTAFR,PTPRJ,RAB13,RAC2,RET,RPL24,CCL5,CCL11,SMO,SPI1,STX4,TGFB1,TRIO,TRPM2,TSC…
10_Member	GO Biological Processes	GO:0042330	taxis	-23.2255	-20.733	101/610	102,214,351,566,659,811,1012,1230,1232,1235,1385,1398,1399,1432,1436,1808,1839,1843,1855,1880,1907,1948,1991,2150,2152,2247,2252,2867,3146,3148,3265,3269,3569,3570,3586,3673,3685,3689,3690,3913,4046,4067,4089,4354,4756,4781,4804,4851,4853,4914,5054,5155,5159,5293,5328,5594,5641,5724,5795,5872,5880,5979,6152,6352,6356,6608,6688,6810,7040,7204,7226,7249,7422,7473,7869,8061,8398,8482,8851,9097,9252,…	ADAM10,ALCAM,APP,AZU1,BMPR2,CALR,CDH13,CCR1,CCR3,CCR6,CREB1,CRK,CRKL,MAPK14,CSF1R,DPYSL2,HBEGF,DUSP1,DVL1,GPR183,EDN2,EFNB2,ELANE,F2RL1,F3,FGF2,FGF7,FFAR2,HMGB1,HMGB2,HRAS,HRH1,IL6,IL6R,IL10,ITGA2,ITGAV,ITGB2,ITGB3,LAMB2,LSP1,LYN,SMAD4,MPP1,NEO1,NFIB,NGFR,NOTCH1,NOTCH2,NTRK1,SERPINE1,PDGFB,PDGFRB,PIK3CD,PLAU,MAPK1,LGMN,PTAFR,PTPRJ,RAB13,RAC2,RET,RPL24,CCL5,CCL11,SMO,SPI1,STX4,TGFB1,TRIO,TRPM2,TSC…
10_Member	GO Biological Processes	GO:0050920	regulation of chemotaxis	-16.4664	-14.472	49/224	102,566,659,811,1012,1230,1235,1436,1843,1880,1907,1948,1991,2150,2152,2247,3146,3569,3570,3673,4067,4354,4851,5054,5155,5159,5594,5641,5880,6352,6688,6810,7040,7422,7473,7869,8482,9097,10507,54910,55558,56920,57175,64127,65125,91584,114609,196527,729230	ADAM10,AZU1,BMPR2,CALR,CDH13,CCR1,CCR6,CSF1R,DUSP1,GPR183,EDN2,EFNB2,ELANE,F2RL1,F3,FGF2,HMGB1,IL6,IL6R,ITGA2,LYN,MPP1,NOTCH1,SERPINE1,PDGFB,PDGFRB,MAPK1,LGMN,RAC2,CCL5,SPI1,STX4,TGFB1,VEGFA,WNT3,SEMA3B,SEMA7A,USP14,SEMA4D,SEMA4C,PLXNA3,SEMA3G,CORO1B,NOD2,WNK1,PLXNA4,TIRAP,ANO6,CCR2
10_Member	GO Biological Processes	GO:0050900	leukocyte migration	-16.3083	-14.3232	65/372	102,207,326,351,566,811,961,975,1230,1235,1398,1399,1436,1843,1880,1907,1991,2059,2150,2529,2813,2867,3146,3269,3383,3554,3569,3570,3586,3673,3688,3689,4067,4354,4478,4627,5054,5155,5293,5594,5641,5657,5724,5734,5880,5979,6352,6356,6688,7226,7422,7525,8784,8976,50848,51135,51192,64127,65125,81704,114609,140885,196527,375056,729230	ADAM10,AKT1,AIRE,APP,AZU1,CALR,CD47,CD81,CCR1,CCR6,CRK,CRKL,CSF1R,DUSP1,GPR183,EDN2,ELANE,EPS8,F2RL1,FUT7,GP2,FFAR2,HMGB1,HRH1,ICAM1,IL1R1,IL6,IL6R,IL10,ITGA2,ITGB1,ITGB2,LYN,MPP1,MSN,MYH9,SERPINE1,PDGFB,PIK3CD,MAPK1,LGMN,PRTN3,PTAFR,PTGER4,RAC2,RET,CCL5,CCL11,SPI1,TRPM2,VEGFA,YES1,TNFRSF18,WASL,F11R,IRAK4,CKLF,NOD2,WNK1,DOCK8,TIRAP,SIRPA,ANO6,MIA3,CCR2
10_Member	GO Biological Processes	GO:0002685	regulation of leukocyte migration	-13.9785	-12.1608	44/212	102,207,326,351,811,961,975,1230,1235,1398,1399,1436,1843,1907,1991,2150,2529,3146,3383,3554,3569,3570,3673,4067,4354,4478,5054,5594,5641,5724,5734,5880,6352,6688,7422,8784,8976,64127,65125,81704,114609,196527,375056,729230	ADAM10,AKT1,AIRE,APP,CALR,CD47,CD81,CCR1,CCR6,CRK,CRKL,CSF1R,DUSP1,EDN2,ELANE,F2RL1,FUT7,HMGB1,ICAM1,IL1R1,IL6,IL6R,ITGA2,LYN,MPP1,MSN,SERPINE1,MAPK1,LGMN,PTAFR,PTGER4,RAC2,CCL5,SPI1,VEGFA,TNFRSF18,WASL,NOD2,WNK1,DOCK8,TIRAP,ANO6,MIA3,CCR2
10_Member	GO Biological Processes	GO:0071674	mononuclear cell migration	-12.5196	-10.813	40/196	102,207,326,351,811,961,1230,1235,1398,1399,1436,1843,1880,2059,2529,3146,3383,3569,3570,4067,4478,5054,5155,5293,5594,5641,5979,6352,6356,6688,7226,8976,50848,51192,65125,81704,140885,196527,375056,729230	ADAM10,AKT1,AIRE,APP,CALR,CD47,CCR1,CCR6,CRK,CRKL,CSF1R,DUSP1,GPR183,EPS8,FUT7,HMGB1,ICAM1,IL6,IL6R,LYN,MSN,SERPINE1,PDGFB,PIK3CD,MAPK1,LGMN,RET,CCL5,CCL11,SPI1,TRPM2,WASL,F11R,CKLF,WNK1,DOCK8,SIRPA,ANO6,MIA3,CCR2
10_Member	GO Biological Processes	GO:0050921	positive regulation of chemotaxis	-10.7337	-9.17271	31/141	102,566,659,811,1012,1230,1235,1436,1907,2150,2152,2247,3146,3569,3570,3673,5054,5155,5159,5594,5641,5880,6352,6688,6810,7040,7422,65125,114609,196527,729230	ADAM10,AZU1,BMPR2,CALR,CDH13,CCR1,CCR6,CSF1R,EDN2,F2RL1,F3,FGF2,HMGB1,IL6,IL6R,ITGA2,SERPINE1,PDGFB,PDGFRB,MAPK1,LGMN,RAC2,CCL5,SPI1,STX4,TGFB1,VEGFA,WNK1,TIRAP,ANO6,CCR2
10_Member	GO Biological Processes	GO:0002687	positive regulation of leukocyte migration	-10.5337	-8.98358	30/135	102,351,811,961,1230,1235,1436,1907,2150,3146,3383,3554,3569,3570,3673,5054,5594,5641,5724,5880,6352,6688,7422,8784,65125,81704,114609,196527,375056,729230	ADAM10,APP,CALR,CD47,CCR1,CCR6,CSF1R,EDN2,F2RL1,HMGB1,ICAM1,IL1R1,IL6,IL6R,ITGA2,SERPINE1,MAPK1,LGMN,PTAFR,RAC2,CCL5,SPI1,VEGFA,TNFRSF18,WNK1,DOCK8,TIRAP,ANO6,MIA3,CCR2
10_Member	GO Biological Processes	GO:0071675	regulation of mononuclear cell migration	-9.48443	-8.01703	26/114	102,207,326,351,811,961,1230,1235,1398,1399,1436,1843,3146,4067,4478,5054,5594,5641,6352,6688,8976,65125,81704,196527,375056,729230	ADAM10,AKT1,AIRE,APP,CALR,CD47,CCR1,CCR6,CRK,CRKL,CSF1R,DUSP1,HMGB1,LYN,MSN,SERPINE1,MAPK1,LGMN,CCL5,SPI1,WASL,WNK1,DOCK8,ANO6,MIA3,CCR2
10_Member	GO Biological Processes	GO:0060326	cell chemotaxis	-9.16098	-7.72044	46/312	102,566,811,1230,1232,1235,1398,1399,1436,1839,1843,1880,1907,2150,2247,2867,3146,3148,3269,3569,3570,3586,3689,4067,4354,4851,5054,5155,5159,5293,5594,5641,5872,5880,6352,6356,6688,7226,7422,51192,57175,64127,65125,114609,196527,729230	ADAM10,AZU1,CALR,CCR1,CCR3,CCR6,CRK,CRKL,CSF1R,HBEGF,DUSP1,GPR183,EDN2,F2RL1,FGF2,FFAR2,HMGB1,HMGB2,HRH1,IL6,IL6R,IL10,ITGB2,LYN,MPP1,NOTCH1,SERPINE1,PDGFB,PDGFRB,PIK3CD,MAPK1,LGMN,RAB13,RAC2,CCL5,CCL11,SPI1,TRPM2,VEGFA,CKLF,CORO1B,NOD2,WNK1,TIRAP,ANO6,CCR2
10_Member	GO Biological Processes	GO:0097529	myeloid leukocyte migration	-8.3716	-7.00465	36/223	566,961,975,1230,1436,1843,1907,2529,2813,3146,3269,3554,3569,3570,3689,4067,4354,5054,5155,5293,5594,5641,5657,5734,5880,6352,6356,6688,7422,51135,51192,64127,114609,140885,196527,729230	AZU1,CD47,CD81,CCR1,CSF1R,DUSP1,EDN2,FUT7,GP2,HMGB1,HRH1,IL1R1,IL6,IL6R,ITGB2,LYN,MPP1,SERPINE1,PDGFB,PIK3CD,MAPK1,LGMN,PRTN3,PTGER4,RAC2,CCL5,CCL11,SPI1,VEGFA,IRAK4,CKLF,NOD2,TIRAP,SIRPA,ANO6,CCR2
10_Member	GO Biological Processes	GO:0002688	regulation of leukocyte chemotaxis	-8.04862	-6.70227	25/123	102,811,1230,1235,1436,1843,1907,2150,3146,3569,3570,4067,4354,5054,5594,5641,5880,6352,6688,7422,64127,65125,114609,196527,729230	ADAM10,CALR,CCR1,CCR6,CSF1R,DUSP1,EDN2,F2RL1,HMGB1,IL6,IL6R,LYN,MPP1,SERPINE1,MAPK1,LGMN,RAC2,CCL5,SPI1,VEGFA,NOD2,WNK1,TIRAP,ANO6,CCR2
10_Member	GO Biological Processes	GO:0030595	leukocyte chemotaxis	-7.90586	-6.56493	36/232	102,566,811,1230,1235,1436,1843,1880,1907,2150,2867,3146,3269,3569,3570,3586,3689,4067,4354,5054,5155,5293,5594,5641,5880,6352,6356,6688,7226,7422,51192,64127,65125,114609,196527,729230	ADAM10,AZU1,CALR,CCR1,CCR6,CSF1R,DUSP1,GPR183,EDN2,F2RL1,FFAR2,HMGB1,HRH1,IL6,IL6R,IL10,ITGB2,LYN,MPP1,SERPINE1,PDGFB,PIK3CD,MAPK1,LGMN,RAC2,CCL5,CCL11,SPI1,TRPM2,VEGFA,CKLF,NOD2,WNK1,TIRAP,ANO6,CCR2
10_Member	GO Biological Processes	GO:0002690	positive regulation of leukocyte chemotaxis	-7.62251	-6.30574	21/94	102,811,1230,1235,1436,1907,2150,3146,3569,3570,5054,5594,5641,5880,6352,6688,7422,65125,114609,196527,729230	ADAM10,CALR,CCR1,CCR6,CSF1R,EDN2,F2RL1,HMGB1,IL6,IL6R,SERPINE1,MAPK1,LGMN,RAC2,CCL5,SPI1,VEGFA,WNK1,TIRAP,ANO6,CCR2
10_Member	GO Biological Processes	GO:0036336	dendritic cell migration	-7.1238	-5.85691	12/33	811,1230,1235,1880,2059,3146,6352,6688,7226,81704,196527,729230	CALR,CCR1,CCR6,GPR183,EPS8,HMGB1,CCL5,SPI1,TRPM2,DOCK8,ANO6,CCR2
10_Member	GO Biological Processes	GO:0002407	dendritic cell chemotaxis	-6.29539	-5.09981	10/26	811,1230,1235,1880,3146,6352,6688,7226,196527,729230	CALR,CCR1,CCR6,GPR183,HMGB1,CCL5,SPI1,TRPM2,ANO6,CCR2
10_Member	GO Biological Processes	GO:0071677	positive regulation of mononuclear cell migration	-5.81866	-4.6686	15/65	102,351,811,961,1230,1235,3146,5054,5641,6352,6688,65125,81704,196527,729230	ADAM10,APP,CALR,CD47,CCR1,CCR6,HMGB1,SERPINE1,LGMN,CCL5,SPI1,WNK1,DOCK8,ANO6,CCR2
11_Summary	GO Biological Processes	GO:0071396	cellular response to lipid	-32.1451	-29.1056	112/575	111,116,142,207,367,472,558,572,599,632,648,672,811,923,949,1019,1191,1373,1374,1385,1432,1604,1616,1869,2099,2100,2101,2308,2867,2908,3146,3148,3169,3383,3394,3553,3569,3586,3600,3624,3638,3654,3673,3934,3949,4058,4064,4067,4478,4602,4654,4790,4793,4843,5054,5165,5292,5336,5578,5594,5724,5754,5978,5979,6095,6352,6608,6688,6715,7001,7035,7040,7128,7473,7484,7525,7533,7538,7804,8074,8322,8751,8915…	ADCY5,ADCYAP1,PARP1,AKT1,AR,ATM,AXL,BAD,BCL2L2,BGLAP,BMI1,BRCA1,CALR,CD6,SCARB1,CDK4,CLU,CPS1,CPT1A,CREB1,MAPK14,CD55,DAXX,E2F1,ESR1,ESR2,ESRRA,FOXO1,FFAR2,NR3C1,HMGB1,HMGB2,FOXA1,ICAM1,IRF8,IL1B,IL6,IL10,IL15,INHBA,INSIG1,IRAK1,ITGA2,LCN2,LDLR,LTK,CD180,LYN,MSN,MYB,MYOD1,NFKB1,NFKBIB,NOS2,SERPINE1,PDK3,PIM1,PLCG2,PRKCA,MAPK1,PTAFR,PTK7,REST,RET,RORA,CCL5,SMO,SPI1,SRD5A1,PRDX2,TFPI,TGFB1,TNFAIP3,…
11_Member	GO Biological Processes	GO:0071396	cellular response to lipid	-32.1451	-29.1056	112/575	111,116,142,207,367,472,558,572,599,632,648,672,811,923,949,1019,1191,1373,1374,1385,1432,1604,1616,1869,2099,2100,2101,2308,2867,2908,3146,3148,3169,3383,3394,3553,3569,3586,3600,3624,3638,3654,3673,3934,3949,4058,4064,4067,4478,4602,4654,4790,4793,4843,5054,5165,5292,5336,5578,5594,5724,5754,5978,5979,6095,6352,6608,6688,6715,7001,7035,7040,7128,7473,7484,7525,7533,7538,7804,8074,8322,8751,8915…	ADCY5,ADCYAP1,PARP1,AKT1,AR,ATM,AXL,BAD,BCL2L2,BGLAP,BMI1,BRCA1,CALR,CD6,SCARB1,CDK4,CLU,CPS1,CPT1A,CREB1,MAPK14,CD55,DAXX,E2F1,ESR1,ESR2,ESRRA,FOXO1,FFAR2,NR3C1,HMGB1,HMGB2,FOXA1,ICAM1,IRF8,IL1B,IL6,IL10,IL15,INHBA,INSIG1,IRAK1,ITGA2,LCN2,LDLR,LTK,CD180,LYN,MSN,MYB,MYOD1,NFKB1,NFKBIB,NOS2,SERPINE1,PDK3,PIM1,PLCG2,PRKCA,MAPK1,PTAFR,PTK7,REST,RET,RORA,CCL5,SMO,SPI1,SRD5A1,PRDX2,TFPI,TGFB1,TNFAIP3,…
11_Member	GO Biological Processes	GO:0032496	response to lipopolysaccharide	-23.5509	-21.0343	73/342	207,356,488,558,923,949,1019,1373,1432,1543,1604,1991,2149,2353,2643,2796,3146,3148,3383,3394,3553,3569,3586,3654,3764,3934,4064,4067,4091,4790,4793,4843,4851,5054,5336,5578,5594,5724,5734,6352,6556,6648,6678,6688,7001,7035,7040,7056,7128,7538,8915,10417,10594,10891,11019,11027,11093,11221,22900,22904,23097,55593,57162,58509,59307,64127,79931,92140,114609,140885,153090,259230,353376	AKT1,FASLG,ATP2A2,AXL,CD6,SCARB1,CDK4,CPS1,MAPK14,CYP1A1,CD55,ELANE,F2R,FOS,GCH1,GNRH1,HMGB1,HMGB2,ICAM1,IRF8,IL1B,IL6,IL10,IRAK1,KCNJ8,LCN2,CD180,LYN,SMAD6,NFKB1,NFKBIB,NOS2,NOTCH1,SERPINE1,PLCG2,PRKCA,MAPK1,PTAFR,PTGER4,CCL5,SLC11A1,SOD2,SPARC,SPI1,PRDX2,TFPI,TGFB1,THBD,TNFAIP3,ZFP36,BCL10,SPON2,PRPF8,PPARGC1A,LIAS,LILRA2,ADAMTS13,DUSP10,CARD8,SBNO2,CDK19,OTUD5,PELI1,CACTIN,SIGIRR,NOD2,TNIP3,MT…
11_Member	GO Biological Processes	GO:0002237	response to molecule of bacterial origin	-23.3378	-20.8395	75/362	207,356,488,558,567,923,949,1019,1373,1432,1543,1604,1991,2149,2353,2643,2796,3146,3148,3383,3394,3553,3569,3586,3654,3764,3934,4064,4067,4091,4790,4793,4843,4851,5054,5336,5578,5594,5724,5734,6352,6556,6648,6678,6688,7001,7035,7040,7056,7128,7538,8915,10417,10594,10891,11019,11027,11093,11221,22900,22904,23097,54106,55593,57162,58509,59307,64127,79931,92140,114609,140885,153090,259230,353376	AKT1,FASLG,ATP2A2,AXL,B2M,CD6,SCARB1,CDK4,CPS1,MAPK14,CYP1A1,CD55,ELANE,F2R,FOS,GCH1,GNRH1,HMGB1,HMGB2,ICAM1,IRF8,IL1B,IL6,IL10,IRAK1,KCNJ8,LCN2,CD180,LYN,SMAD6,NFKB1,NFKBIB,NOS2,NOTCH1,SERPINE1,PLCG2,PRKCA,MAPK1,PTAFR,PTGER4,CCL5,SLC11A1,SOD2,SPARC,SPI1,PRDX2,TFPI,TGFB1,THBD,TNFAIP3,ZFP36,BCL10,SPON2,PRPF8,PPARGC1A,LIAS,LILRA2,ADAMTS13,DUSP10,CARD8,SBNO2,CDK19,TLR9,OTUD5,PELI1,CACTIN,SIGIRR,NOD2…
11_Member	GO Biological Processes	GO:0071216	cellular response to biotic stimulus	-21.1624	-18.8259	58/245	207,558,923,949,1019,1432,1604,3146,3148,3383,3394,3553,3569,3586,3654,3934,4064,4067,4790,4793,4843,5054,5336,5578,5594,5724,6352,6688,7001,7035,7040,7128,7157,7538,8243,8915,9451,10018,10417,10594,10628,10891,11027,11093,22900,22904,23097,58509,59307,64127,79931,84464,92140,114609,140885,153090,259230,353376	AKT1,AXL,CD6,SCARB1,CDK4,MAPK14,CD55,HMGB1,HMGB2,ICAM1,IRF8,IL1B,IL6,IL10,IRAK1,LCN2,CD180,LYN,NFKB1,NFKBIB,NOS2,SERPINE1,PLCG2,PRKCA,MAPK1,PTAFR,CCL5,SPI1,PRDX2,TFPI,TGFB1,TNFAIP3,TP53,ZFP36,SMC1A,BCL10,EIF2AK3,BCL2L11,SPON2,PRPF8,TXNIP,PPARGC1A,LILRA2,ADAMTS13,CARD8,SBNO2,CDK19,CACTIN,SIGIRR,NOD2,TNIP3,SLX4,MTDH,TIRAP,SIRPA,DAB2IP,SGMS1,TICAM2
11_Member	GO Biological Processes	GO:0071222	cellular response to lipopolysaccharide	-19.4012	-17.2097	51/208	207,558,923,949,1019,1432,1604,3146,3148,3383,3394,3553,3569,3586,3654,3934,4064,4067,4790,4793,4843,5054,5336,5578,5594,5724,6352,6688,7001,7035,7040,7128,7538,8915,10417,10594,10891,11027,11093,22900,22904,23097,58509,59307,64127,79931,92140,140885,153090,259230,353376	AKT1,AXL,CD6,SCARB1,CDK4,MAPK14,CD55,HMGB1,HMGB2,ICAM1,IRF8,IL1B,IL6,IL10,IRAK1,LCN2,CD180,LYN,NFKB1,NFKBIB,NOS2,SERPINE1,PLCG2,PRKCA,MAPK1,PTAFR,CCL5,SPI1,PRDX2,TFPI,TGFB1,TNFAIP3,ZFP36,BCL10,SPON2,PRPF8,PPARGC1A,LILRA2,ADAMTS13,CARD8,SBNO2,CDK19,CACTIN,SIGIRR,NOD2,TNIP3,MTDH,SIRPA,DAB2IP,SGMS1,TICAM2
11_Member	GO Biological Processes	GO:0071219	cellular response to molecule of bacterial origin	-19.006	-16.8538	52/220	207,558,923,949,1019,1432,1604,3146,3148,3383,3394,3553,3569,3586,3654,3934,4064,4067,4790,4793,4843,5054,5336,5578,5594,5724,6352,6688,7001,7035,7040,7128,7538,8915,10417,10594,10891,11027,11093,22900,22904,23097,58509,59307,64127,79931,92140,114609,140885,153090,259230,353376	AKT1,AXL,CD6,SCARB1,CDK4,MAPK14,CD55,HMGB1,HMGB2,ICAM1,IRF8,IL1B,IL6,IL10,IRAK1,LCN2,CD180,LYN,NFKB1,NFKBIB,NOS2,SERPINE1,PLCG2,PRKCA,MAPK1,PTAFR,CCL5,SPI1,PRDX2,TFPI,TGFB1,TNFAIP3,ZFP36,BCL10,SPON2,PRPF8,PPARGC1A,LILRA2,ADAMTS13,CARD8,SBNO2,CDK19,CACTIN,SIGIRR,NOD2,TNIP3,MTDH,TIRAP,SIRPA,DAB2IP,SGMS1,TICAM2
11_Member	GO Biological Processes	GO:0009617	response to bacterium	-17.1474	-15.0974	102/748	207,356,488,558,566,567,650,857,923,949,1019,1373,1432,1543,1604,1675,1690,1991,2149,2150,2289,2353,2643,2796,3133,3146,3148,3383,3394,3516,3553,3569,3570,3575,3586,3654,3764,3934,4064,4067,4091,4292,4781,4790,4793,4843,4851,4853,5054,5336,5578,5594,5724,5734,5861,6352,6464,6556,6648,6678,6688,7001,7035,7040,7056,7098,7128,7538,8398,8915,8976,9370,10417,10594,10891,11019,11027,11093,11126,11221,2…	AKT1,FASLG,ATP2A2,AXL,AZU1,B2M,BMP2,CAV1,CD6,SCARB1,CDK4,CPS1,MAPK14,CYP1A1,CD55,CFD,COCH,ELANE,F2R,F2RL1,FKBP5,FOS,GCH1,GNRH1,HLA-E,HMGB1,HMGB2,ICAM1,IRF8,RBPJ,IL1B,IL6,IL6R,IL7R,IL10,IRAK1,KCNJ8,LCN2,CD180,LYN,SMAD6,MLH1,NFIB,NFKB1,NFKBIB,NOS2,NOTCH1,NOTCH2,SERPINE1,PLCG2,PRKCA,MAPK1,PTAFR,PTGER4,RAB1A,CCL5,SHC1,SLC11A1,SOD2,SPARC,SPI1,PRDX2,TFPI,TGFB1,THBD,TLR3,TNFAIP3,ZFP36,PLA2G6,BCL10,WASL,…
11_Member	GO Biological Processes	GO:0031663	lipopolysaccharide-mediated signaling pathway	-14.7253	-12.8591	24/60	207,923,949,1432,1604,3553,3654,4064,4067,5336,5578,5594,5724,6352,6688,7001,7040,7128,8915,11027,22900,58509,59307,92140	AKT1,CD6,SCARB1,MAPK14,CD55,IL1B,IRAK1,CD180,LYN,PLCG2,PRKCA,MAPK1,PTAFR,CCL5,SPI1,PRDX2,TGFB1,TNFAIP3,BCL10,LILRA2,CARD8,CACTIN,SIGIRR,MTDH
11_Member	GO Biological Processes	GO:0031664	regulation of lipopolysaccharide-mediated signaling pathway	-5.43827	-4.33183	9/25	1604,4064,5578,7001,7128,11027,22900,58509,59307	CD55,CD180,PRKCA,PRDX2,TNFAIP3,LILRA2,CARD8,CACTIN,SIGIRR
12_Summary	GO Biological Processes	GO:0071363	cellular response to growth factor stimulus	-32.0682	-29.0682	124/689	91,142,207,331,351,493,538,632,650,656,657,659,857,867,960,1278,1280,1373,1385,1398,1399,1432,1453,1783,1869,1915,1938,1958,2081,2247,2252,2280,2296,2353,2627,2889,2908,3037,3091,3096,3209,3340,3397,3516,3553,3586,3611,3675,3688,3690,3696,3934,3987,4087,4089,4091,4092,4193,4221,4756,4804,4851,4853,4914,5139,5155,5159,5170,5293,5300,5468,5494,5579,5641,5728,6198,6352,6464,6497,6498,6688,6715,6774,…	ACVR1B,PARP1,AKT1,XIAP,APP,ATP2B4,ATP7A,BGLAP,BMP2,BMP8B,BMPR1A,BMPR2,CAV1,CBL,CD44,COL1A2,COL2A1,CPS1,CREB1,CRK,CRKL,MAPK14,CSNK1D,DYNC1LI2,E2F1,EEF1A1,EEF2,EGR1,ERN1,FGF2,FGF7,FKBP1A,FOXC1,FOS,GATA6,RAPGEF1,NR3C1,HAS2,HIF1A,HIVEP1,HOXA13,NDST1,ID1,RBPJ,IL1B,IL10,ILK,ITGA3,ITGB1,ITGB3,ITGB8,LCN2,LIMS1,SMAD2,SMAD4,SMAD6,SMAD7,MDM2,MEN1,NEO1,NGFR,NOTCH1,NOTCH2,NTRK1,PDE3A,PDGFB,PDGFRB,PDPK1,PIK3CD…
12_Member	GO Biological Processes	GO:0071363	cellular response to growth factor stimulus	-32.0682	-29.0682	124/689	91,142,207,331,351,493,538,632,650,656,657,659,857,867,960,1278,1280,1373,1385,1398,1399,1432,1453,1783,1869,1915,1938,1958,2081,2247,2252,2280,2296,2353,2627,2889,2908,3037,3091,3096,3209,3340,3397,3516,3553,3586,3611,3675,3688,3690,3696,3934,3987,4087,4089,4091,4092,4193,4221,4756,4804,4851,4853,4914,5139,5155,5159,5170,5293,5300,5468,5494,5579,5641,5728,6198,6352,6464,6497,6498,6688,6715,6774,…	ACVR1B,PARP1,AKT1,XIAP,APP,ATP2B4,ATP7A,BGLAP,BMP2,BMP8B,BMPR1A,BMPR2,CAV1,CBL,CD44,COL1A2,COL2A1,CPS1,CREB1,CRK,CRKL,MAPK14,CSNK1D,DYNC1LI2,E2F1,EEF1A1,EEF2,EGR1,ERN1,FGF2,FGF7,FKBP1A,FOXC1,FOS,GATA6,RAPGEF1,NR3C1,HAS2,HIF1A,HIVEP1,HOXA13,NDST1,ID1,RBPJ,IL1B,IL10,ILK,ITGA3,ITGB1,ITGB3,ITGB8,LCN2,LIMS1,SMAD2,SMAD4,SMAD6,SMAD7,MDM2,MEN1,NEO1,NGFR,NOTCH1,NOTCH2,NTRK1,PDE3A,PDGFB,PDGFRB,PDPK1,PIK3CD…
12_Member	GO Biological Processes	GO:0070848	response to growth factor	-31.9507	-28.987	127/720	91,142,207,331,351,356,493,538,632,650,656,657,659,857,864,867,960,1278,1280,1373,1385,1398,1399,1432,1453,1783,1869,1915,1938,1958,2081,2247,2252,2280,2296,2353,2627,2889,2908,3037,3091,3096,3209,3340,3397,3516,3553,3586,3611,3675,3688,3690,3696,3934,3987,4087,4089,4091,4092,4193,4221,4756,4804,4851,4853,4914,5139,5155,5159,5170,5293,5300,5468,5494,5579,5594,5641,5728,6198,6352,6464,6497,6498,66…	ACVR1B,PARP1,AKT1,XIAP,APP,FASLG,ATP2B4,ATP7A,BGLAP,BMP2,BMP8B,BMPR1A,BMPR2,CAV1,RUNX3,CBL,CD44,COL1A2,COL2A1,CPS1,CREB1,CRK,CRKL,MAPK14,CSNK1D,DYNC1LI2,E2F1,EEF1A1,EEF2,EGR1,ERN1,FGF2,FGF7,FKBP1A,FOXC1,FOS,GATA6,RAPGEF1,NR3C1,HAS2,HIF1A,HIVEP1,HOXA13,NDST1,ID1,RBPJ,IL1B,IL10,ILK,ITGA3,ITGB1,ITGB3,ITGB8,LCN2,LIMS1,SMAD2,SMAD4,SMAD6,SMAD7,MDM2,MEN1,NEO1,NGFR,NOTCH1,NOTCH2,NTRK1,PDE3A,PDGFB,PDGFRB,…
12_Member	GO Biological Processes	GO:0007178	transmembrane receptor protein serine/threonine kinase signaling pathway	-15.3347	-13.4263	62/359	91,142,331,650,656,657,659,857,1278,1385,1432,1958,2280,2353,3096,3209,3397,3516,3611,3624,3675,3688,3696,4087,4089,4091,4092,4221,4756,4851,4853,5170,5300,5468,5494,6497,6498,6688,6774,7040,7048,7157,7321,8239,9197,9315,9372,10140,10220,23089,23411,23770,50515,51341,51701,55612,64750,199699,200734,255743,285704,353500	ACVR1B,PARP1,XIAP,BMP2,BMP8B,BMPR1A,BMPR2,CAV1,COL1A2,CREB1,MAPK14,EGR1,FKBP1A,FOS,HIVEP1,HOXA13,ID1,RBPJ,ILK,INHBA,ITGA3,ITGB1,ITGB8,SMAD2,SMAD4,SMAD6,SMAD7,MEN1,NEO1,NOTCH1,NOTCH2,PDPK1,PIN1,PPARG,PPM1A,SKI,SKIL,SPI1,STAT3,TGFB1,TGFBR2,TP53,UBE2D1,USP9X,SLC33A1,NREP,ZFYVE9,TOB1,GDF11,PEG10,SIRT1,FKBP8,CHST11,ZBTB7A,NLK,FERMT1,SMURF2,DAND5,SPRED2,NPNT,RGMB,BMP8A
12_Member	GO Biological Processes	GO:0071559	response to transforming growth factor beta	-13.7568	-11.9574	49/260	142,650,657,857,864,1278,1385,1398,1399,2280,2353,2908,3397,3675,3688,3696,3987,4087,4089,4091,4092,4221,5139,5170,5300,5468,5494,6497,6498,6688,6774,7040,7048,7157,7525,8239,9315,9372,10891,23089,23411,50515,51341,51701,55612,64750,199699,200734,255743	PARP1,BMP2,BMPR1A,CAV1,RUNX3,COL1A2,CREB1,CRK,CRKL,FKBP1A,FOS,NR3C1,ID1,ITGA3,ITGB1,ITGB8,LIMS1,SMAD2,SMAD4,SMAD6,SMAD7,MEN1,PDE3A,PDPK1,PIN1,PPARG,PPM1A,SKI,SKIL,SPI1,STAT3,TGFB1,TGFBR2,TP53,YES1,USP9X,NREP,ZFYVE9,PPARGC1A,PEG10,SIRT1,CHST11,ZBTB7A,NLK,FERMT1,SMURF2,DAND5,SPRED2,NPNT
12_Member	GO Biological Processes	GO:0071560	cellular response to transforming growth factor beta stimulus	-13.5368	-11.7538	48/254	142,650,657,857,1278,1385,1398,1399,2280,2353,2908,3397,3675,3688,3696,3987,4087,4089,4091,4092,4221,5139,5170,5300,5468,5494,6497,6498,6688,6774,7040,7048,7157,7525,8239,9315,9372,10891,23089,23411,50515,51341,51701,55612,64750,199699,200734,255743	PARP1,BMP2,BMPR1A,CAV1,COL1A2,CREB1,CRK,CRKL,FKBP1A,FOS,NR3C1,ID1,ITGA3,ITGB1,ITGB8,LIMS1,SMAD2,SMAD4,SMAD6,SMAD7,MEN1,PDE3A,PDPK1,PIN1,PPARG,PPM1A,SKI,SKIL,SPI1,STAT3,TGFB1,TGFBR2,TP53,YES1,USP9X,NREP,ZFYVE9,PPARGC1A,PEG10,SIRT1,CHST11,ZBTB7A,NLK,FERMT1,SMURF2,DAND5,SPRED2,NPNT
12_Member	GO Biological Processes	GO:0007179	transforming growth factor beta receptor signaling pathway	-12.7319	-11.0097	41/202	142,650,657,857,1278,1385,2280,2353,3397,3675,3688,3696,4087,4089,4091,4092,4221,5170,5300,5468,5494,6497,6498,6688,6774,7040,7048,7157,8239,9315,9372,23089,23411,50515,51341,51701,55612,64750,199699,200734,255743	PARP1,BMP2,BMPR1A,CAV1,COL1A2,CREB1,FKBP1A,FOS,ID1,ITGA3,ITGB1,ITGB8,SMAD2,SMAD4,SMAD6,SMAD7,MEN1,PDPK1,PIN1,PPARG,PPM1A,SKI,SKIL,SPI1,STAT3,TGFB1,TGFBR2,TP53,USP9X,NREP,ZFYVE9,PEG10,SIRT1,CHST11,ZBTB7A,NLK,FERMT1,SMURF2,DAND5,SPRED2,NPNT
12_Member	GO Biological Processes	GO:0090287	regulation of cellular response to growth factor stimulus	-11.6676	-10.0399	50/304	331,493,650,659,857,2247,2280,3091,3209,3516,3553,3611,3675,3690,4087,4089,4091,4092,4221,4756,4804,4851,4853,5170,5300,5468,5494,5579,6497,6498,7040,7157,7321,8322,9315,10140,23089,23411,23770,26999,27020,50515,51341,55612,64750,153090,199699,200734,255743,406985	XIAP,ATP2B4,BMP2,BMPR2,CAV1,FGF2,FKBP1A,HIF1A,HOXA13,RBPJ,IL1B,ILK,ITGA3,ITGB3,SMAD2,SMAD4,SMAD6,SMAD7,MEN1,NEO1,NGFR,NOTCH1,NOTCH2,PDPK1,PIN1,PPARG,PPM1A,PRKCB,SKI,SKIL,TGFB1,TP53,UBE2D1,FZD4,NREP,TOB1,PEG10,SIRT1,FKBP8,CYFIP2,NPTN,CHST11,ZBTB7A,FERMT1,SMURF2,DAB2IP,DAND5,SPRED2,NPNT,MIR200C
12_Member	GO Biological Processes	GO:0090092	regulation of transmembrane receptor protein serine/threonine kinase signaling pathway	-11.5257	-9.91139	45/257	91,142,331,650,656,657,659,857,2280,3209,3516,3611,3624,3675,4087,4089,4091,4092,4221,4756,4851,4853,5170,5300,5468,5494,6497,6498,7040,7157,7321,9315,10140,10220,23089,23411,23770,50515,51341,55612,64750,199699,200734,255743,353500	ACVR1B,PARP1,XIAP,BMP2,BMP8B,BMPR1A,BMPR2,CAV1,FKBP1A,HOXA13,RBPJ,ILK,INHBA,ITGA3,SMAD2,SMAD4,SMAD6,SMAD7,MEN1,NEO1,NOTCH1,NOTCH2,PDPK1,PIN1,PPARG,PPM1A,SKI,SKIL,TGFB1,TP53,UBE2D1,NREP,TOB1,GDF11,PEG10,SIRT1,FKBP8,CHST11,ZBTB7A,FERMT1,SMURF2,DAND5,SPRED2,NPNT,BMP8A
12_Member	GO Biological Processes	GO:0071772	response to BMP	-10.2789	-8.74971	33/164	331,650,656,657,659,1280,1958,2627,3096,3209,3516,3611,3675,4087,4089,4091,4092,4756,4851,4853,5468,6497,6498,7040,7321,8239,9197,10140,23770,64750,199699,285704,353500	XIAP,BMP2,BMP8B,BMPR1A,BMPR2,COL2A1,EGR1,GATA6,HIVEP1,HOXA13,RBPJ,ILK,ITGA3,SMAD2,SMAD4,SMAD6,SMAD7,NEO1,NOTCH1,NOTCH2,PPARG,SKI,SKIL,TGFB1,UBE2D1,USP9X,SLC33A1,TOB1,FKBP8,SMURF2,DAND5,RGMB,BMP8A
12_Member	GO Biological Processes	GO:0071773	cellular response to BMP stimulus	-10.2789	-8.74971	33/164	331,650,656,657,659,1280,1958,2627,3096,3209,3516,3611,3675,4087,4089,4091,4092,4756,4851,4853,5468,6497,6498,7040,7321,8239,9197,10140,23770,64750,199699,285704,353500	XIAP,BMP2,BMP8B,BMPR1A,BMPR2,COL2A1,EGR1,GATA6,HIVEP1,HOXA13,RBPJ,ILK,ITGA3,SMAD2,SMAD4,SMAD6,SMAD7,NEO1,NOTCH1,NOTCH2,PPARG,SKI,SKIL,TGFB1,UBE2D1,USP9X,SLC33A1,TOB1,FKBP8,SMURF2,DAND5,RGMB,BMP8A
12_Member	GO Biological Processes	GO:0030509	BMP signaling pathway	-9.92938	-8.4238	31/151	331,650,656,657,659,1958,3096,3209,3516,3611,3675,4087,4089,4091,4092,4756,4851,4853,5468,6497,6498,7040,7321,8239,9197,10140,23770,64750,199699,285704,353500	XIAP,BMP2,BMP8B,BMPR1A,BMPR2,EGR1,HIVEP1,HOXA13,RBPJ,ILK,ITGA3,SMAD2,SMAD4,SMAD6,SMAD7,NEO1,NOTCH1,NOTCH2,PPARG,SKI,SKIL,TGFB1,UBE2D1,USP9X,SLC33A1,TOB1,FKBP8,SMURF2,DAND5,RGMB,BMP8A
12_Member	GO Biological Processes	GO:0017015	regulation of transforming growth factor beta receptor signaling pathway	-8.93351	-7.51132	27/129	650,857,2280,3675,4087,4089,4091,4092,4221,5170,5300,5468,5494,6497,6498,7040,7157,9315,23089,23411,50515,51341,55612,64750,199699,200734,255743	BMP2,CAV1,FKBP1A,ITGA3,SMAD2,SMAD4,SMAD6,SMAD7,MEN1,PDPK1,PIN1,PPARG,PPM1A,SKI,SKIL,TGFB1,TP53,NREP,PEG10,SIRT1,CHST11,ZBTB7A,FERMT1,SMURF2,DAND5,SPRED2,NPNT
12_Member	GO Biological Processes	GO:1903844	regulation of cellular response to transforming growth factor beta stimulus	-8.70114	-7.29943	27/132	650,857,2280,3675,4087,4089,4091,4092,4221,5170,5300,5468,5494,6497,6498,7040,7157,9315,23089,23411,50515,51341,55612,64750,199699,200734,255743	BMP2,CAV1,FKBP1A,ITGA3,SMAD2,SMAD4,SMAD6,SMAD7,MEN1,PDPK1,PIN1,PPARG,PPM1A,SKI,SKIL,TGFB1,TP53,NREP,PEG10,SIRT1,CHST11,ZBTB7A,FERMT1,SMURF2,DAND5,SPRED2,NPNT
12_Member	KEGG Pathway	hsa04350	TGF-beta signaling pathway	-8.55936	-7.17262	21/84	91,650,656,657,659,3397,3398,3624,4087,4089,4091,4092,5518,5594,6198,6199,7040,7048,9372,64750,353500	ACVR1B,BMP2,BMP8B,BMPR1A,BMPR2,ID1,ID2,INHBA,SMAD2,SMAD4,SMAD6,SMAD7,PPP2R1A,MAPK1,RPS6KB1,RPS6KB2,TGFB1,TGFBR2,ZFYVE9,SMURF2,BMP8A
12_Member	KEGG Pathway	ko04350	TGF-beta signaling pathway	-8.55936	-7.17262	21/84	91,650,656,657,659,3397,3398,3624,4087,4089,4091,4092,5518,5594,6198,6199,7040,7048,9372,64750,353500	ACVR1B,BMP2,BMP8B,BMPR1A,BMPR2,ID1,ID2,INHBA,SMAD2,SMAD4,SMAD6,SMAD7,PPP2R1A,MAPK1,RPS6KB1,RPS6KB2,TGFB1,TGFBR2,ZFYVE9,SMURF2,BMP8A
12_Member	Canonical Pathways	M181	PID BMP PATHWAY	-7.65018	-6.32987	14/42	331,650,657,659,4089,4091,4092,5494,5499,5594,6497,10217,64750,285704	XIAP,BMP2,BMPR1A,BMPR2,SMAD4,SMAD6,SMAD7,PPM1A,PPP1CA,MAPK1,SKI,CTDSPL,SMURF2,RGMB
12_Member	GO Biological Processes	GO:0030510	regulation of BMP signaling pathway	-7.53661	-6.22913	21/95	331,659,3209,3516,3611,3675,4087,4089,4091,4092,4756,4851,4853,5468,6497,6498,7321,10140,23770,64750,199699	XIAP,BMPR2,HOXA13,RBPJ,ILK,ITGA3,SMAD2,SMAD4,SMAD6,SMAD7,NEO1,NOTCH1,NOTCH2,PPARG,SKI,SKIL,UBE2D1,TOB1,FKBP8,SMURF2,DAND5
12_Member	GO Biological Processes	GO:0030512	negative regulation of transforming growth factor beta receptor signaling pathway	-7.32236	-6.03474	19/81	650,857,2280,4091,4092,5170,5300,5468,5494,6497,6498,7157,23089,23411,50515,51341,64750,199699,200734	BMP2,CAV1,FKBP1A,SMAD6,SMAD7,PDPK1,PIN1,PPARG,PPM1A,SKI,SKIL,TP53,PEG10,SIRT1,CHST11,ZBTB7A,SMURF2,DAND5,SPRED2
12_Member	GO Biological Processes	GO:0090100	positive regulation of transmembrane receptor protein serine/threonine kinase signaling pathway	-6.74501	-5.50683	22/114	91,142,650,656,657,659,3516,3611,3624,4087,4089,4221,4756,4851,4853,5468,7040,10220,23770,55612,255743,353500	ACVR1B,PARP1,BMP2,BMP8B,BMPR1A,BMPR2,RBPJ,ILK,INHBA,SMAD2,SMAD4,MEN1,NEO1,NOTCH1,NOTCH2,PPARG,TGFB1,GDF11,FKBP8,FERMT1,NPNT,BMP8A
12_Member	GO Biological Processes	GO:0060395	SMAD protein signal transduction	-6.42165	-5.21528	18/83	142,650,656,657,659,2353,3624,4087,4089,4091,4092,5468,6497,7040,9197,10140,10220,353500	PARP1,BMP2,BMP8B,BMPR1A,BMPR2,FOS,INHBA,SMAD2,SMAD4,SMAD6,SMAD7,PPARG,SKI,TGFB1,SLC33A1,TOB1,GDF11,BMP8A
12_Member	WikiPathways	WP1425	Bone morphogenic protein (BMP) signaling and regulation	-6.07433	-4.90071	7/12	650,657,659,4089,4091,10140,10766	BMP2,BMPR1A,BMPR2,SMAD4,SMAD6,TOB1,TOB2
12_Member	GO Biological Processes	GO:0060389	pathway-restricted SMAD protein phosphorylation	-5.81866	-4.6686	15/65	91,650,656,657,659,3624,4089,4091,4092,5300,5468,7040,7048,10220,353500	ACVR1B,BMP2,BMP8B,BMPR1A,BMPR2,INHBA,SMAD4,SMAD6,SMAD7,PIN1,PPARG,TGFB1,TGFBR2,GDF11,BMP8A
12_Member	GO Biological Processes	GO:0090101	negative regulation of transmembrane receptor protein serine/threonine kinase signaling pathway	-5.72825	-4.58873	22/130	650,857,2280,4091,4092,4851,5170,5300,5468,5494,6497,6498,7157,7321,10140,23089,23411,50515,51341,64750,199699,200734	BMP2,CAV1,FKBP1A,SMAD6,SMAD7,NOTCH1,PDPK1,PIN1,PPARG,PPM1A,SKI,SKIL,TP53,UBE2D1,TOB1,PEG10,SIRT1,CHST11,ZBTB7A,SMURF2,DAND5,SPRED2
12_Member	GO Biological Processes	GO:0060393	regulation of pathway-restricted SMAD protein phosphorylation	-5.35256	-4.25282	14/62	91,650,656,657,659,3624,4089,4091,4092,5300,5468,7040,10220,353500	ACVR1B,BMP2,BMP8B,BMPR1A,BMPR2,INHBA,SMAD4,SMAD6,SMAD7,PIN1,PPARG,TGFB1,GDF11,BMP8A
13_Summary	GO Biological Processes	GO:1901699	cellular response to nitrogen compound	-31.878	-28.9313	124/692	60,111,142,156,207,324,328,351,493,538,599,632,641,672,815,840,857,1019,1141,1278,1373,1385,1398,1399,1445,1583,1616,1729,1815,1958,1979,2058,2101,2308,2529,2642,2771,2776,2782,2889,2902,2903,2931,3269,3383,3397,3479,3480,3481,3553,3638,3784,3934,4067,4193,4221,4644,4790,4804,4914,4976,5027,5139,5170,5468,5579,5594,5621,5641,5724,5728,5791,5872,6198,6464,6495,6528,6548,6715,6774,7071,7098,7157,71…	ACTB,ADCY5,PARP1,GRK2,AKT1,APC,APEX1,APP,ATP2B4,ATP7A,BCL2L2,BGLAP,BLM,BRCA1,CAMK2A,CASP7,CAV1,CDK4,CHRNB2,COL1A2,CPS1,CREB1,CRK,CRKL,CSK,CYP11A1,DAXX,DIAPH1,DRD4,EGR1,EIF4EBP2,EPRS1,ESRRA,FOXO1,FUT7,GCGR,GNAI2,GNAQ,GNB1,RAPGEF1,GRIN1,GRIN2A,GSK3A,HRH1,ICAM1,ID1,IGF1,IGF1R,IGF2,IL1B,INSIG1,KCNQ1,LCN2,LYN,MDM2,MEN1,MYO5A,NFKB1,NGFR,NTRK1,OPA1,P2RX7,PDE3A,PDPK1,PPARG,PRKCB,MAPK1,PRNP,LGMN,PTAFR,PTE…
13_Member	GO Biological Processes	GO:1901699	cellular response to nitrogen compound	-31.878	-28.9313	124/692	60,111,142,156,207,324,328,351,493,538,599,632,641,672,815,840,857,1019,1141,1278,1373,1385,1398,1399,1445,1583,1616,1729,1815,1958,1979,2058,2101,2308,2529,2642,2771,2776,2782,2889,2902,2903,2931,3269,3383,3397,3479,3480,3481,3553,3638,3784,3934,4067,4193,4221,4644,4790,4804,4914,4976,5027,5139,5170,5468,5579,5594,5621,5641,5724,5728,5791,5872,6198,6464,6495,6528,6548,6715,6774,7071,7098,7157,71…	ACTB,ADCY5,PARP1,GRK2,AKT1,APC,APEX1,APP,ATP2B4,ATP7A,BCL2L2,BGLAP,BLM,BRCA1,CAMK2A,CASP7,CAV1,CDK4,CHRNB2,COL1A2,CPS1,CREB1,CRK,CRKL,CSK,CYP11A1,DAXX,DIAPH1,DRD4,EGR1,EIF4EBP2,EPRS1,ESRRA,FOXO1,FUT7,GCGR,GNAI2,GNAQ,GNB1,RAPGEF1,GRIN1,GRIN2A,GSK3A,HRH1,ICAM1,ID1,IGF1,IGF1R,IGF2,IL1B,INSIG1,KCNQ1,LCN2,LYN,MDM2,MEN1,MYO5A,NFKB1,NGFR,NTRK1,OPA1,P2RX7,PDE3A,PDPK1,PPARG,PRKCB,MAPK1,PRNP,LGMN,PTAFR,PTE…
13_Member	GO Biological Processes	GO:0071417	cellular response to organonitrogen compound	-29.2502	-26.4326	114/637	60,111,142,207,324,328,351,493,538,599,632,641,672,815,840,857,1019,1278,1373,1385,1398,1445,1583,1729,1815,1958,1979,2058,2101,2308,2529,2642,2771,2782,2889,2902,2903,2931,3269,3383,3397,3479,3480,3481,3553,3638,3784,3934,4067,4193,4221,4644,4790,4804,4914,4976,5027,5139,5170,5468,5579,5594,5621,5641,5724,5728,5791,5872,6198,6464,6495,6528,6548,6715,6774,7071,7157,7184,7226,7249,7351,7490,8850,9…	ACTB,ADCY5,PARP1,AKT1,APC,APEX1,APP,ATP2B4,ATP7A,BCL2L2,BGLAP,BLM,BRCA1,CAMK2A,CASP7,CAV1,CDK4,COL1A2,CPS1,CREB1,CRK,CSK,CYP11A1,DIAPH1,DRD4,EGR1,EIF4EBP2,EPRS1,ESRRA,FOXO1,FUT7,GCGR,GNAI2,GNB1,RAPGEF1,GRIN1,GRIN2A,GSK3A,HRH1,ICAM1,ID1,IGF1,IGF1R,IGF2,IL1B,INSIG1,KCNQ1,LCN2,LYN,MDM2,MEN1,MYO5A,NFKB1,NGFR,NTRK1,OPA1,P2RX7,PDE3A,PDPK1,PPARG,PRKCB,MAPK1,PRNP,LGMN,PTAFR,PTEN,PTPRE,RAB13,RPS6KB1,SHC1,…
13_Member	GO Biological Processes	GO:1901652	response to peptide	-27.1528	-24.4246	97/508	142,182,207,324,328,351,599,632,815,857,1019,1027,1373,1385,1398,1432,1445,1583,1958,1979,2058,2069,2101,2308,2529,2642,2771,2796,2902,2903,2931,3033,3383,3397,3479,3480,3481,3553,3586,3638,3784,3934,4067,4193,4221,4644,4747,4790,4804,4851,4914,4976,5020,5170,5468,5579,5621,5641,5728,5791,5872,6198,6464,6548,6678,6715,6773,6774,6775,7071,7128,7157,7248,7249,7351,7832,8826,8850,9349,9370,10018,101…	PARP1,JAG1,AKT1,APC,APEX1,APP,BCL2L2,BGLAP,CAMK2A,CAV1,CDK4,CDKN1B,CPS1,CREB1,CRK,MAPK14,CSK,CYP11A1,EGR1,EIF4EBP2,EPRS1,EREG,ESRRA,FOXO1,FUT7,GCGR,GNAI2,GNRH1,GRIN1,GRIN2A,GSK3A,HADH,ICAM1,ID1,IGF1,IGF1R,IGF2,IL1B,IL10,INSIG1,KCNQ1,LCN2,LYN,MDM2,MEN1,MYO5A,NEFL,NFKB1,NGFR,NOTCH1,NTRK1,OPA1,OXT,PDPK1,PPARG,PRKCB,PRNP,LGMN,PTEN,PTPRE,RAB13,RPS6KB1,SHC1,SLC9A1,SPARC,SRD5A1,STAT2,STAT3,STAT4,KLF10,T…
13_Member	GO Biological Processes	GO:1901653	cellular response to peptide	-23.9426	-21.3938	76/363	142,207,324,328,351,599,632,815,857,1019,1373,1385,1398,1445,1583,1979,2058,2101,2308,2529,2642,2771,2902,2903,2931,3383,3397,3479,3480,3481,3553,3638,3934,4067,4193,4221,4644,4790,4804,4914,4976,5170,5468,5579,5621,5641,5728,5791,5872,6198,6464,6548,6715,6774,7071,7157,7249,7351,8850,9349,9370,10018,10135,10661,11132,23175,23411,23484,23621,51237,51274,51762,57761,64127,64710,255738	PARP1,AKT1,APC,APEX1,APP,BCL2L2,BGLAP,CAMK2A,CAV1,CDK4,CPS1,CREB1,CRK,CSK,CYP11A1,EIF4EBP2,EPRS1,ESRRA,FOXO1,FUT7,GCGR,GNAI2,GRIN1,GRIN2A,GSK3A,ICAM1,ID1,IGF1,IGF1R,IGF2,IL1B,INSIG1,LCN2,LYN,MDM2,MEN1,MYO5A,NFKB1,NGFR,NTRK1,OPA1,PDPK1,PPARG,PRKCB,PRNP,LGMN,PTEN,PTPRE,RAB13,RPS6KB1,SHC1,SLC9A1,SRD5A1,STAT3,KLF10,TP53,TSC2,UCP2,KAT2B,RPL23,ADIPOQ,BCL2L11,NAMPT,KLF1,CAPN10,LPIN1,SIRT1,LEPROTL1,BACE1…
13_Member	GO Biological Processes	GO:0032870	cellular response to hormone stimulus	-21.6379	-19.2629	96/588	116,142,207,324,328,367,632,648,672,811,815,857,1019,1373,1385,1398,1445,1583,1616,1843,1979,2058,2099,2100,2101,2180,2308,2353,2529,2627,2642,2771,2782,2908,2931,3169,3383,3480,3481,3553,3624,3638,4067,4193,4221,4644,4654,4790,4851,4976,5170,5468,5563,5579,5728,5734,5791,5872,5915,5978,6198,6464,6528,6548,6715,6774,7035,7249,7351,7357,7490,7533,7538,8074,8850,9370,9612,10018,10135,10728,10891,11…	ADCYAP1,PARP1,AKT1,APC,APEX1,AR,BGLAP,BMI1,BRCA1,CALR,CAMK2A,CAV1,CDK4,CPS1,CREB1,CRK,CSK,CYP11A1,DAXX,DUSP1,EIF4EBP2,EPRS1,ESR1,ESR2,ESRRA,ACSL1,FOXO1,FOS,FUT7,GATA6,GCGR,GNAI2,GNB1,NR3C1,GSK3A,FOXA1,ICAM1,IGF1R,IGF2,IL1B,INHBA,INSIG1,LYN,MDM2,MEN1,MYO5A,MYOD1,NFKB1,NOTCH1,OPA1,PDPK1,PPARG,PRKAA2,PRKCB,PTEN,PTGER4,PTPRE,RAB13,RARB,REST,RPS6KB1,SHC1,SLC5A5,SLC9A1,SRD5A1,STAT3,TFPI,TSC2,UCP2,UGCG,…
13_Member	GO Biological Processes	GO:0043434	response to peptide hormone	-18.3531	-16.2393	73/416	142,207,324,328,632,815,857,1019,1027,1373,1385,1398,1445,1583,1958,1979,2058,2069,2101,2308,2529,2642,2771,2796,2931,3033,3383,3480,3481,3553,3586,3638,3784,4067,4193,4221,4644,4747,4790,4976,5020,5170,5468,5579,5728,5791,5872,6198,6464,6548,6678,6715,6773,6774,6775,7248,7249,7351,7832,8826,8850,9370,10135,11132,23175,23411,23484,51237,51762,54832,57761,64710,255738	PARP1,AKT1,APC,APEX1,BGLAP,CAMK2A,CAV1,CDK4,CDKN1B,CPS1,CREB1,CRK,CSK,CYP11A1,EGR1,EIF4EBP2,EPRS1,EREG,ESRRA,FOXO1,FUT7,GCGR,GNAI2,GNRH1,GSK3A,HADH,ICAM1,IGF1R,IGF2,IL1B,IL10,INSIG1,KCNQ1,LYN,MDM2,MEN1,MYO5A,NEFL,NFKB1,OPA1,OXT,PDPK1,PPARG,PRKCB,PTEN,PTPRE,RAB13,RPS6KB1,SHC1,SLC9A1,SPARC,SRD5A1,STAT2,STAT3,STAT4,TSC1,TSC2,UCP2,BTG2,IQGAP1,KAT2B,ADIPOQ,NAMPT,CAPN10,LPIN1,SIRT1,LEPROTL1,MZB1,RAB8B,…
13_Member	GO Biological Processes	GO:0071375	cellular response to peptide hormone stimulus	-15.979	-14.0221	56/292	142,207,324,328,632,815,857,1019,1373,1385,1398,1445,1583,1979,2058,2101,2308,2529,2642,2771,2931,3480,3481,3553,3638,4067,4193,4221,4644,4790,4976,5170,5468,5579,5728,5791,5872,6198,6464,6548,6715,6774,7249,7351,8850,9370,10135,11132,23175,23411,23484,51237,51762,57761,64710,255738	PARP1,AKT1,APC,APEX1,BGLAP,CAMK2A,CAV1,CDK4,CPS1,CREB1,CRK,CSK,CYP11A1,EIF4EBP2,EPRS1,ESRRA,FOXO1,FUT7,GCGR,GNAI2,GSK3A,IGF1R,IGF2,IL1B,INSIG1,LYN,MDM2,MEN1,MYO5A,NFKB1,OPA1,PDPK1,PPARG,PRKCB,PTEN,PTPRE,RAB13,RPS6KB1,SHC1,SLC9A1,SRD5A1,STAT3,TSC2,UCP2,KAT2B,ADIPOQ,NAMPT,CAPN10,LPIN1,SIRT1,LEPROTL1,MZB1,RAB8B,TRIB3,NUCKS1,PCSK9
13_Member	GO Biological Processes	GO:0032868	response to insulin	-13.3586	-11.5902	49/266	142,207,324,632,1019,1958,1979,2058,2101,2308,2529,2771,2931,3033,3383,3480,3481,3553,3586,3638,3784,4067,4644,4976,5170,5468,5579,5728,5791,5872,6198,6464,6548,6715,7248,7249,7351,8850,9370,10135,11132,23175,23411,51237,51762,54832,57761,64710,255738	PARP1,AKT1,APC,BGLAP,CDK4,EGR1,EIF4EBP2,EPRS1,ESRRA,FOXO1,FUT7,GNAI2,GSK3A,HADH,ICAM1,IGF1R,IGF2,IL1B,IL10,INSIG1,KCNQ1,LYN,MYO5A,OPA1,PDPK1,PPARG,PRKCB,PTEN,PTPRE,RAB13,RPS6KB1,SHC1,SLC9A1,SRD5A1,TSC1,TSC2,UCP2,KAT2B,ADIPOQ,NAMPT,CAPN10,LPIN1,SIRT1,MZB1,RAB8B,VPS13C,TRIB3,NUCKS1,PCSK9
13_Member	GO Biological Processes	GO:0032869	cellular response to insulin stimulus	-12.5085	-10.8029	41/205	142,207,324,632,1019,1979,2058,2101,2308,2529,2771,2931,3480,3481,3553,3638,4644,4976,5170,5468,5579,5728,5791,5872,6198,6464,6548,6715,7249,7351,8850,9370,10135,11132,23175,23411,51237,51762,57761,64710,255738	PARP1,AKT1,APC,BGLAP,CDK4,EIF4EBP2,EPRS1,ESRRA,FOXO1,FUT7,GNAI2,GSK3A,IGF1R,IGF2,IL1B,INSIG1,MYO5A,OPA1,PDPK1,PPARG,PRKCB,PTEN,PTPRE,RAB13,RPS6KB1,SHC1,SLC9A1,SRD5A1,TSC2,UCP2,KAT2B,ADIPOQ,NAMPT,CAPN10,LPIN1,SIRT1,MZB1,RAB8B,TRIB3,NUCKS1,PCSK9
13_Member	GO Biological Processes	GO:0008286	insulin receptor signaling pathway	-5.8624	-4.70563	21/118	207,324,1019,1979,2308,2529,2771,2931,3480,3481,3553,4976,5579,5791,6198,6464,7249,10135,23411,51237,64710	AKT1,APC,CDK4,EIF4EBP2,FOXO1,FUT7,GNAI2,GSK3A,IGF1R,IGF2,IL1B,OPA1,PRKCB,PTPRE,RPS6KB1,SHC1,TSC2,NAMPT,SIRT1,MZB1,NUCKS1
14_Summary	Reactome Gene Sets	R-HSA-2262752	Cellular responses to stress	-31.5012	-28.5709	130/757	367,472,538,571,648,811,815,829,830,898,1019,1026,1027,1029,1032,1329,1340,1385,1432,1783,1869,1871,1912,1915,1965,2081,2289,2353,2908,2931,3017,3021,3091,3159,3304,3312,3313,3397,3569,4001,4189,4193,4194,4209,4683,4736,4790,4800,4928,5594,5600,5601,5611,5686,5693,5702,5711,5713,5925,6095,6117,6130,6132,6133,6137,6152,6165,6176,6193,6209,6210,6222,6233,6416,6464,6648,6774,6834,6907,7001,7094,7157…	AR,ATM,ATP7A,BACH1,BMI1,CALR,CAMK2A,CAPZA1,CAPZA2,CCNE1,CDK4,CDKN1A,CDKN1B,CDKN2A,CDKN2D,COX5B,COX6B1,CREB1,MAPK14,DYNC1LI2,E2F1,E2F3,PHC2,EEF1A1,EIF2S1,ERN1,FKBP5,FOS,NR3C1,GSK3A,H2BC5,H3-3B,HIF1A,HMGA1,HSPA1B,HSPA8,HSPA9,ID1,IL6,LMNB1,DNAJB9,MDM2,MDM4,MEF2D,NBN,RPL10A,NFKB1,NFYA,NUP98,MAPK1,MAPK11,MAPK9,DNAJC3,PSMA5,PSMB5,PSMC3,PSMD5,PSMD7,RB1,RORA,RPA1,RPL7A,RPL8,RPL9,RPL13,RPL24,RPL35A,RPLP1,…
14_Member	Reactome Gene Sets	R-HSA-2262752	Cellular responses to stress	-31.5012	-28.5709	130/757	367,472,538,571,648,811,815,829,830,898,1019,1026,1027,1029,1032,1329,1340,1385,1432,1783,1869,1871,1912,1915,1965,2081,2289,2353,2908,2931,3017,3021,3091,3159,3304,3312,3313,3397,3569,4001,4189,4193,4194,4209,4683,4736,4790,4800,4928,5594,5600,5601,5611,5686,5693,5702,5711,5713,5925,6095,6117,6130,6132,6133,6137,6152,6165,6176,6193,6209,6210,6222,6233,6416,6464,6648,6774,6834,6907,7001,7094,7157…	AR,ATM,ATP7A,BACH1,BMI1,CALR,CAMK2A,CAPZA1,CAPZA2,CCNE1,CDK4,CDKN1A,CDKN1B,CDKN2A,CDKN2D,COX5B,COX6B1,CREB1,MAPK14,DYNC1LI2,E2F1,E2F3,PHC2,EEF1A1,EIF2S1,ERN1,FKBP5,FOS,NR3C1,GSK3A,H2BC5,H3-3B,HIF1A,HMGA1,HSPA1B,HSPA8,HSPA9,ID1,IL6,LMNB1,DNAJB9,MDM2,MDM4,MEF2D,NBN,RPL10A,NFKB1,NFYA,NUP98,MAPK1,MAPK11,MAPK9,DNAJC3,PSMA5,PSMB5,PSMC3,PSMD5,PSMD7,RB1,RORA,RPA1,RPL7A,RPL8,RPL9,RPL13,RPL24,RPL35A,RPLP1,…
14_Member	Reactome Gene Sets	R-HSA-8953897	Cellular responses to stimuli	-31.2644	-28.3499	131/771	367,472,538,571,648,811,815,829,830,898,1019,1026,1027,1029,1032,1329,1340,1385,1432,1783,1869,1871,1912,1915,1965,2081,2289,2353,2908,2931,3017,3021,3091,3159,3304,3312,3313,3397,3569,4001,4189,4193,4194,4209,4520,4683,4736,4790,4800,4928,5594,5600,5601,5611,5686,5693,5702,5711,5713,5925,6095,6117,6130,6132,6133,6137,6152,6165,6176,6193,6209,6210,6222,6233,6416,6464,6648,6774,6834,6907,7001,7094…	AR,ATM,ATP7A,BACH1,BMI1,CALR,CAMK2A,CAPZA1,CAPZA2,CCNE1,CDK4,CDKN1A,CDKN1B,CDKN2A,CDKN2D,COX5B,COX6B1,CREB1,MAPK14,DYNC1LI2,E2F1,E2F3,PHC2,EEF1A1,EIF2S1,ERN1,FKBP5,FOS,NR3C1,GSK3A,H2BC5,H3-3B,HIF1A,HMGA1,HSPA1B,HSPA8,HSPA9,ID1,IL6,LMNB1,DNAJB9,MDM2,MDM4,MEF2D,MTF1,NBN,RPL10A,NFKB1,NFYA,NUP98,MAPK1,MAPK11,MAPK9,DNAJC3,PSMA5,PSMB5,PSMC3,PSMD5,PSMD7,RB1,RORA,RPA1,RPL7A,RPL8,RPL9,RPL13,RPL24,RPL35A,R…
15_Summary	GO Biological Processes	GO:1902532	negative regulation of intracellular signal transduction	-30.7206	-27.836	105/531	207,472,493,596,599,604,650,754,857,960,1032,1191,1432,1445,1654,1827,1843,1859,2099,2150,2308,2907,2931,3091,3480,3553,3675,3688,3708,4067,4089,4170,4193,4221,4771,4976,5027,5048,5139,5300,5468,5494,5563,5621,5728,5777,5795,6095,6648,6688,7077,7128,7248,7249,7291,7320,7417,8445,8452,8527,8550,8841,9231,9370,9529,9587,9927,9971,10010,10019,10105,10114,10347,10771,11221,11329,22821,22900,23411,236…	AKT1,ATM,ATP2B4,BCL2,BCL2L2,BCL6,BMP2,PTTG1IP,CAV1,CD44,CDKN2D,CLU,MAPK14,CSK,DDX3X,RCAN1,DUSP1,DYRK1A,ESR1,F2RL1,FOXO1,GRINA,GSK3A,HIF1A,IGF1R,IL1B,ITGA3,ITGB1,ITPR1,LYN,SMAD4,MCL1,MDM2,MEN1,NF2,OPA1,P2RX7,PAFAH1B1,PDE3A,PIN1,PPARG,PPM1A,PRKAA2,PRNP,PTEN,PTPN6,PTPRJ,RORA,SOD2,SPI1,TIMP2,TNFAIP3,TSC1,TSC2,TWIST1,UBE2B,VDAC2,DYRK2,CUL3,DGKD,MAPKAPK5,HDAC3,DLG5,ADIPOQ,BAG5,MAD2L1BP,MFN2,NR1H4,TANK,…
15_Member	GO Biological Processes	GO:1902532	negative regulation of intracellular signal transduction	-30.7206	-27.836	105/531	207,472,493,596,599,604,650,754,857,960,1032,1191,1432,1445,1654,1827,1843,1859,2099,2150,2308,2907,2931,3091,3480,3553,3675,3688,3708,4067,4089,4170,4193,4221,4771,4976,5027,5048,5139,5300,5468,5494,5563,5621,5728,5777,5795,6095,6648,6688,7077,7128,7248,7249,7291,7320,7417,8445,8452,8527,8550,8841,9231,9370,9529,9587,9927,9971,10010,10019,10105,10114,10347,10771,11221,11329,22821,22900,23411,236…	AKT1,ATM,ATP2B4,BCL2,BCL2L2,BCL6,BMP2,PTTG1IP,CAV1,CD44,CDKN2D,CLU,MAPK14,CSK,DDX3X,RCAN1,DUSP1,DYRK1A,ESR1,F2RL1,FOXO1,GRINA,GSK3A,HIF1A,IGF1R,IL1B,ITGA3,ITGB1,ITPR1,LYN,SMAD4,MCL1,MDM2,MEN1,NF2,OPA1,P2RX7,PAFAH1B1,PDE3A,PIN1,PPARG,PPM1A,PRKAA2,PRNP,PTEN,PTPN6,PTPRJ,RORA,SOD2,SPI1,TIMP2,TNFAIP3,TSC1,TSC2,TWIST1,UBE2B,VDAC2,DYRK2,CUL3,DGKD,MAPKAPK5,HDAC3,DLG5,ADIPOQ,BAG5,MAD2L1BP,MFN2,NR1H4,TANK,…
15_Member	GO Biological Processes	GO:0031400	negative regulation of protein modification process	-27.7409	-24.9702	99/518	103,207,324,493,578,650,672,805,857,867,1026,1027,1029,1032,1399,1487,1843,1855,2280,2771,2776,2810,3304,3553,3611,3984,4067,4085,4091,4092,4221,4298,4771,5170,5468,5518,5524,5563,5573,5611,5621,5728,5777,5795,5925,6209,6497,6598,6659,6688,7040,7128,7249,7291,7320,7531,8850,9043,9349,9370,9467,9529,9532,9555,9655,9683,10019,10114,10217,10362,10507,10891,11221,11329,11338,23411,23435,23512,23770,2…	ADAR,AKT1,APC,ATP2B4,BAK1,BMP2,BRCA1,CALM2,CAV1,CBL,CDKN1A,CDKN1B,CDKN2A,CDKN2D,CRKL,CTBP1,DUSP1,DVL1,FKBP1A,GNAI2,GNAQ,SFN,HSPA1B,IL1B,ILK,LIMK1,LYN,MAD2L1,SMAD6,SMAD7,MEN1,MLLT1,NF2,PDPK1,PPARG,PPP2R1A,PTPA,PRKAA2,PRKAR1A,DNAJC3,PRNP,PTEN,PTPN6,PTPRJ,RB1,RPS15,SKI,SMARCB1,SOX4,SPI1,TGFB1,TNFAIP3,TSC2,TWIST1,UBE2B,YWHAE,KAT2B,SPAG9,RPL23,ADIPOQ,SH3BP5,BAG5,BAG2,MACROH2A1,SOCS5,N4BP1,SH2B3,HIPK3,…
15_Member	GO Biological Processes	GO:0010563	negative regulation of phosphorus metabolic process	-23.4145	-20.9041	84/442	103,142,207,324,578,650,805,857,867,1026,1027,1029,1032,1399,1445,1843,1855,2280,2771,2776,2810,2931,3553,3611,3624,4067,4091,4092,4221,4298,4771,5155,5170,5468,5518,5524,5573,5611,5621,5728,5777,5795,5925,6774,7040,7128,7157,7249,7291,7320,7531,8850,9043,9370,9467,9555,9655,10019,10114,10217,10507,10891,11221,11329,23411,23435,23512,23770,25998,26146,54431,54541,54900,56288,57761,58509,65125,808…	ADAR,PARP1,AKT1,APC,BAK1,BMP2,CALM2,CAV1,CBL,CDKN1A,CDKN1B,CDKN2A,CDKN2D,CRKL,CSK,DUSP1,DVL1,FKBP1A,GNAI2,GNAQ,SFN,GSK3A,IL1B,ILK,INHBA,LYN,SMAD6,SMAD7,MEN1,MLLT1,NF2,PDGFB,PDPK1,PPARG,PPP2R1A,PTPA,PRKAR1A,DNAJC3,PRNP,PTEN,PTPN6,PTPRJ,RB1,STAT3,TGFB1,TNFAIP3,TP53,TSC2,TWIST1,UBE2B,YWHAE,KAT2B,SPAG9,ADIPOQ,SH3BP5,MACROH2A1,SOCS5,SH2B3,HIPK3,CTDSPL,SEMA4D,PPARGC1A,DUSP10,STK38,SIRT1,TARDBP,SUZ12,FK…
15_Member	GO Biological Processes	GO:0045936	negative regulation of phosphate metabolic process	-22.8505	-20.3753	83/441	103,142,207,324,578,650,805,857,867,1026,1027,1029,1032,1399,1445,1843,1855,2280,2771,2776,2810,3553,3611,3624,4067,4091,4092,4221,4298,4771,5155,5170,5468,5518,5524,5573,5611,5621,5728,5777,5795,5925,6774,7040,7128,7157,7249,7291,7320,7531,8850,9043,9370,9467,9555,9655,10019,10114,10217,10507,10891,11221,11329,23411,23435,23512,23770,25998,26146,54431,54541,54900,56288,57761,58509,65125,80851,91…	ADAR,PARP1,AKT1,APC,BAK1,BMP2,CALM2,CAV1,CBL,CDKN1A,CDKN1B,CDKN2A,CDKN2D,CRKL,CSK,DUSP1,DVL1,FKBP1A,GNAI2,GNAQ,SFN,IL1B,ILK,INHBA,LYN,SMAD6,SMAD7,MEN1,MLLT1,NF2,PDGFB,PDPK1,PPARG,PPP2R1A,PTPA,PRKAR1A,DNAJC3,PRNP,PTEN,PTPN6,PTPRJ,RB1,STAT3,TGFB1,TNFAIP3,TP53,TSC2,TWIST1,UBE2B,YWHAE,KAT2B,SPAG9,ADIPOQ,SH3BP5,MACROH2A1,SOCS5,SH2B3,HIPK3,CTDSPL,SEMA4D,PPARGC1A,DUSP10,STK38,SIRT1,TARDBP,SUZ12,FKBP8,IB…
15_Member	GO Biological Processes	GO:0001933	negative regulation of protein phosphorylation	-22.7	-20.2359	72/344	103,207,324,578,650,805,857,867,1026,1027,1029,1032,1399,1843,1855,2776,2810,3553,3611,4067,4091,4092,4221,4298,4771,5170,5468,5518,5573,5611,5621,5728,5777,5795,5925,7040,7128,7249,7291,7320,8850,9043,9370,9467,9555,9655,10019,10114,10217,10507,10891,11221,11329,23411,23435,23512,23770,25998,26146,54431,54541,54900,56288,57761,58509,80851,91663,116496,140885,153090,171392,200734	ADAR,AKT1,APC,BAK1,BMP2,CALM2,CAV1,CBL,CDKN1A,CDKN1B,CDKN2A,CDKN2D,CRKL,DUSP1,DVL1,GNAQ,SFN,IL1B,ILK,LYN,SMAD6,SMAD7,MEN1,MLLT1,NF2,PDPK1,PPARG,PPP2R1A,PRKAR1A,DNAJC3,PRNP,PTEN,PTPN6,PTPRJ,RB1,TGFB1,TNFAIP3,TSC2,TWIST1,UBE2B,KAT2B,SPAG9,ADIPOQ,SH3BP5,MACROH2A1,SOCS5,SH2B3,HIPK3,CTDSPL,SEMA4D,PPARGC1A,DUSP10,STK38,SIRT1,TARDBP,SUZ12,FKBP8,IBTK,TRAF3IP1,DNAJC10,DDIT4,LAX1,PARD3,TRIB3,CACTIN,SH3BP5L…
15_Member	GO Biological Processes	GO:0042326	negative regulation of phosphorylation	-22.2781	-19.8458	76/385	103,207,324,578,650,805,857,867,1026,1027,1029,1032,1399,1445,1843,1855,2776,2810,3553,3611,3624,4067,4091,4092,4221,4298,4771,5170,5468,5518,5573,5611,5621,5728,5777,5795,5925,6774,7040,7128,7249,7291,7320,8850,9043,9370,9467,9555,9655,10019,10114,10217,10507,10891,11221,11329,23411,23435,23512,23770,25998,26146,54431,54541,54900,56288,57761,58509,65125,80851,91663,116496,140885,153090,171392,20…	ADAR,AKT1,APC,BAK1,BMP2,CALM2,CAV1,CBL,CDKN1A,CDKN1B,CDKN2A,CDKN2D,CRKL,CSK,DUSP1,DVL1,GNAQ,SFN,IL1B,ILK,INHBA,LYN,SMAD6,SMAD7,MEN1,MLLT1,NF2,PDPK1,PPARG,PPP2R1A,PRKAR1A,DNAJC3,PRNP,PTEN,PTPN6,PTPRJ,RB1,STAT3,TGFB1,TNFAIP3,TSC2,TWIST1,UBE2B,KAT2B,SPAG9,ADIPOQ,SH3BP5,MACROH2A1,SOCS5,SH2B3,HIPK3,CTDSPL,SEMA4D,PPARGC1A,DUSP10,STK38,SIRT1,TARDBP,SUZ12,FKBP8,IBTK,TRAF3IP1,DNAJC10,DDIT4,LAX1,PARD3,TRIB…
15_Member	GO Biological Processes	GO:0051348	negative regulation of transferase activity	-21.281	-18.9363	61/268	103,207,324,650,857,867,1026,1027,1029,1032,1445,1843,1855,1974,2072,2776,2810,2931,3553,3611,3984,4067,4085,4092,4221,4298,4771,5170,5468,5573,5728,5777,5795,5925,6209,7128,7157,7249,7538,8850,9349,9370,9467,9529,9532,9555,9655,10019,10114,11221,11329,23411,25998,26271,54900,57761,65125,80851,94103,153090,171392	ADAR,AKT1,APC,BMP2,CAV1,CBL,CDKN1A,CDKN1B,CDKN2A,CDKN2D,CSK,DUSP1,DVL1,EIF4A2,ERCC4,GNAQ,SFN,GSK3A,IL1B,ILK,LIMK1,LYN,MAD2L1,SMAD7,MEN1,MLLT1,NF2,PDPK1,PPARG,PRKAR1A,PTEN,PTPN6,PTPRJ,RB1,RPS15,TNFAIP3,TP53,TSC2,ZFP36,KAT2B,RPL23,ADIPOQ,SH3BP5,BAG5,BAG2,MACROH2A1,SOCS5,SH2B3,HIPK3,DUSP10,STK38,SIRT1,IBTK,FBXO5,LAX1,TRIB3,WNK1,SH3BP5L,ORMDL3,DAB2IP,ZNF675
15_Member	GO Biological Processes	GO:0043086	negative regulation of catalytic activity	-20.655	-18.354	113/789	103,116,207,324,331,345,351,493,551,650,815,857,867,960,1026,1027,1029,1032,1445,1654,1718,1843,1855,1974,2072,2280,2771,2776,2810,2931,3265,3553,3574,3611,3984,4067,4085,4092,4193,4221,4298,4771,4790,4851,5054,5170,5468,5524,5573,5611,5621,5728,5777,5795,5925,6050,6209,6815,7035,7077,7128,7157,7248,7249,7422,7538,8416,8826,8850,9049,9097,9349,9370,9467,9529,9532,9555,9655,9806,10019,10049,10105,…	ADAR,ADCYAP1,AKT1,APC,XIAP,APOC3,APP,ATP2B4,AVP,BMP2,CAMK2A,CAV1,CBL,CD44,CDKN1A,CDKN1B,CDKN2A,CDKN2D,CSK,DDX3X,DHCR24,DUSP1,DVL1,EIF4A2,ERCC4,FKBP1A,GNAI2,GNAQ,SFN,GSK3A,HRAS,IL1B,IL7,ILK,LIMK1,LYN,MAD2L1,SMAD7,MDM2,MEN1,MLLT1,NF2,NFKB1,NOTCH1,SERPINE1,PDPK1,PPARG,PTPA,PRKAR1A,DNAJC3,PRNP,PTEN,PTPN6,PTPRJ,RB1,RNH1,RPS15,STYX,TFPI,TIMP2,TNFAIP3,TP53,TSC1,TSC2,VEGFA,ZFP36,ANXA9,IQGAP1,KAT2B,AIP,US…
15_Member	GO Biological Processes	GO:0006469	negative regulation of protein kinase activity	-14.5813	-12.7248	45/213	103,207,324,650,857,867,1026,1027,1029,1032,1843,1855,2776,2810,3553,3611,4067,4221,4298,4771,5170,5468,5573,5728,5777,5795,5925,7128,7249,8850,9370,9467,9555,9655,10019,10114,11221,11329,23411,25998,54900,57761,80851,153090,171392	ADAR,AKT1,APC,BMP2,CAV1,CBL,CDKN1A,CDKN1B,CDKN2A,CDKN2D,DUSP1,DVL1,GNAQ,SFN,IL1B,ILK,LYN,MEN1,MLLT1,NF2,PDPK1,PPARG,PRKAR1A,PTEN,PTPN6,PTPRJ,RB1,TNFAIP3,TSC2,KAT2B,ADIPOQ,SH3BP5,MACROH2A1,SOCS5,SH2B3,HIPK3,DUSP10,STK38,SIRT1,IBTK,LAX1,TRIB3,SH3BP5L,DAB2IP,ZNF675
15_Member	GO Biological Processes	GO:0033673	negative regulation of kinase activity	-14.1643	-12.3328	47/236	103,207,324,650,857,867,1026,1027,1029,1032,1445,1843,1855,2776,2810,3553,3611,4067,4221,4298,4771,5170,5468,5573,5728,5777,5795,5925,7128,7249,8850,9370,9467,9555,9655,10019,10114,11221,11329,23411,25998,54900,57761,65125,80851,153090,171392	ADAR,AKT1,APC,BMP2,CAV1,CBL,CDKN1A,CDKN1B,CDKN2A,CDKN2D,CSK,DUSP1,DVL1,GNAQ,SFN,IL1B,ILK,LYN,MEN1,MLLT1,NF2,PDPK1,PPARG,PRKAR1A,PTEN,PTPN6,PTPRJ,RB1,TNFAIP3,TSC2,KAT2B,ADIPOQ,SH3BP5,MACROH2A1,SOCS5,SH2B3,HIPK3,DUSP10,STK38,SIRT1,IBTK,LAX1,TRIB3,WNK1,SH3BP5L,DAB2IP,ZNF675
15_Member	GO Biological Processes	GO:0043409	negative regulation of MAPK cascade	-12.8175	-11.0893	38/175	207,650,857,1445,1843,2150,2308,3480,3553,4067,4089,4221,4771,5027,5048,5300,5468,5728,5777,5795,8841,9370,10019,10114,10347,10771,11221,11329,27330,54900,80824,140885,153090,171392,200734,284996,374403,406985	AKT1,BMP2,CAV1,CSK,DUSP1,F2RL1,FOXO1,IGF1R,IL1B,LYN,SMAD4,MEN1,NF2,P2RX7,PAFAH1B1,PIN1,PPARG,PTEN,PTPN6,PTPRJ,HDAC3,ADIPOQ,SH2B3,HIPK3,ABCA7,ZMYND11,DUSP10,STK38,RPS6KA6,LAX1,DUSP16,SIRPA,DAB2IP,ZNF675,SPRED2,RNF149,TBC1D10C,MIR200C
15_Member	GO Biological Processes	GO:0071901	negative regulation of protein serine/threonine kinase activity	-11.933	-10.2806	30/120	207,324,650,857,1026,1027,1029,1032,1843,3553,4067,4221,5468,5573,5728,5777,5795,5925,7128,8850,9370,9555,10019,10114,11221,11329,23411,54900,153090,171392	AKT1,APC,BMP2,CAV1,CDKN1A,CDKN1B,CDKN2A,CDKN2D,DUSP1,IL1B,LYN,MEN1,PPARG,PRKAR1A,PTEN,PTPN6,PTPRJ,RB1,TNFAIP3,KAT2B,ADIPOQ,MACROH2A1,SH2B3,HIPK3,DUSP10,STK38,SIRT1,LAX1,DAB2IP,ZNF675
15_Member	GO Biological Processes	GO:0043407	negative regulation of MAP kinase activity	-7.2136	-5.93682	16/59	650,857,1843,3553,4067,5468,5777,5795,9370,10019,10114,11221,11329,54900,153090,171392	BMP2,CAV1,DUSP1,IL1B,LYN,PPARG,PTPN6,PTPRJ,ADIPOQ,SH2B3,HIPK3,DUSP10,STK38,LAX1,DAB2IP,ZNF675
16_Summary	GO Biological Processes	GO:0040008	regulation of growth	-30.1737	-27.3033	118/661	91,102,207,351,367,551,596,604,657,659,861,1019,1026,1027,1029,1032,1385,1399,1432,1654,1808,1839,2100,2247,2296,2627,2810,2931,3021,3091,3304,3479,3481,3516,3574,3611,3624,3984,4089,4092,4654,4851,4853,5048,5292,5300,5518,5538,5594,5600,5641,5728,5795,5925,6464,6495,6548,6595,6608,6722,6774,6788,6789,7037,7040,7048,7157,7422,7473,7490,7528,7869,8089,8408,8482,8751,8851,8879,9043,9655,9706,9746,9…	ACVR1B,ADAM10,AKT1,APP,AR,AVP,BCL2,BCL6,BMPR1A,BMPR2,RUNX1,CDK4,CDKN1A,CDKN1B,CDKN2A,CDKN2D,CREB1,CRKL,MAPK14,DDX3X,DPYSL2,HBEGF,ESR2,FGF2,FOXC1,GATA6,SFN,GSK3A,H3-3B,HIF1A,HSPA1B,IGF1,IGF2,RBPJ,IL7,ILK,INHBA,LIMK1,SMAD4,SMAD7,MYOD1,NOTCH1,NOTCH2,PAFAH1B1,PIM1,PIN1,PPP2R1A,PPT1,MAPK1,MAPK11,LGMN,PTEN,PTPRJ,RB1,SHC1,SIX1,SLC9A1,SMARCA2,SMO,SRF,STAT3,STK3,STK4,TFRC,TGFB1,TGFBR2,TP53,VEGFA,WNT3,WT1,…
16_Member	GO Biological Processes	GO:0040008	regulation of growth	-30.1737	-27.3033	118/661	91,102,207,351,367,551,596,604,657,659,861,1019,1026,1027,1029,1032,1385,1399,1432,1654,1808,1839,2100,2247,2296,2627,2810,2931,3021,3091,3304,3479,3481,3516,3574,3611,3624,3984,4089,4092,4654,4851,4853,5048,5292,5300,5518,5538,5594,5600,5641,5728,5795,5925,6464,6495,6548,6595,6608,6722,6774,6788,6789,7037,7040,7048,7157,7422,7473,7490,7528,7869,8089,8408,8482,8751,8851,8879,9043,9655,9706,9746,9…	ACVR1B,ADAM10,AKT1,APP,AR,AVP,BCL2,BCL6,BMPR1A,BMPR2,RUNX1,CDK4,CDKN1A,CDKN1B,CDKN2A,CDKN2D,CREB1,CRKL,MAPK14,DDX3X,DPYSL2,HBEGF,ESR2,FGF2,FOXC1,GATA6,SFN,GSK3A,H3-3B,HIF1A,HSPA1B,IGF1,IGF2,RBPJ,IL7,ILK,INHBA,LIMK1,SMAD4,SMAD7,MYOD1,NOTCH1,NOTCH2,PAFAH1B1,PIM1,PIN1,PPP2R1A,PPT1,MAPK1,MAPK11,LGMN,PTEN,PTPRJ,RB1,SHC1,SIX1,SLC9A1,SMARCA2,SMO,SRF,STAT3,STK3,STK4,TFRC,TGFB1,TGFBR2,TP53,VEGFA,WNT3,WT1,…
16_Member	GO Biological Processes	GO:0016049	cell growth	-23.6697	-21.1405	89/485	91,102,207,214,351,551,596,604,659,1026,1027,1029,1032,1399,1654,1808,1839,1855,2100,2810,2931,3021,3304,3479,3611,3624,3688,3913,3984,4089,4092,5048,5300,5518,5538,5795,5925,6416,6548,6595,6722,7037,7040,7048,7157,7422,7473,7490,7528,7869,8239,8408,8482,8751,8826,8851,9043,9706,9746,9792,9826,10201,10425,10507,11344,22883,22902,23411,23499,23677,23678,26999,29946,51196,51199,51379,51393,51616,53…	ACVR1B,ADAM10,AKT1,ALCAM,APP,AVP,BCL2,BCL6,BMPR2,CDKN1A,CDKN1B,CDKN2A,CDKN2D,CRKL,DDX3X,DPYSL2,HBEGF,DVL1,ESR2,SFN,GSK3A,H3-3B,HSPA1B,IGF1,ILK,INHBA,ITGB1,LAMB2,LIMK1,SMAD4,SMAD7,PAFAH1B1,PIN1,PPP2R1A,PPT1,PTPRJ,RB1,MAP2K4,SLC9A1,SMARCA2,SRF,TFRC,TGFB1,TGFBR2,TP53,VEGFA,WNT3,WT1,YY1,SEMA3B,USP9X,ULK1,SEMA7A,ADAM15,IQGAP1,CDK5R1,SPAG9,ULK2,CLSTN3,SERTAD2,ARHGEF11,NME6,ARIH2,SEMA4D,TWF2,CLSTN1,RUFY…
16_Member	GO Biological Processes	GO:0001558	regulation of cell growth	-20.7069	-18.4021	77/417	91,102,207,551,596,604,659,1026,1027,1029,1032,1399,1654,1808,1839,2100,2810,2931,3021,3304,3479,3611,3624,3984,4089,4092,5048,5300,5518,5538,5795,5925,6548,6595,6722,7037,7040,7157,7422,7473,7490,7528,7869,8408,8482,8751,8851,9043,9706,9746,9792,9826,10201,10507,11344,22883,22902,23411,23499,23677,23678,29946,51196,51379,51393,51616,53335,54910,55540,55558,55840,56920,56994,65981,91584,112398,13…	ACVR1B,ADAM10,AKT1,AVP,BCL2,BCL6,BMPR2,CDKN1A,CDKN1B,CDKN2A,CDKN2D,CRKL,DDX3X,DPYSL2,HBEGF,ESR2,SFN,GSK3A,H3-3B,HSPA1B,IGF1,ILK,INHBA,LIMK1,SMAD4,SMAD7,PAFAH1B1,PIN1,PPP2R1A,PPT1,PTPRJ,RB1,SLC9A1,SMARCA2,SRF,TFRC,TGFB1,TP53,VEGFA,WNT3,WT1,YY1,SEMA3B,ULK1,SEMA7A,ADAM15,CDK5R1,SPAG9,ULK2,CLSTN3,SERTAD2,ARHGEF11,NME6,SEMA4D,TWF2,CLSTN1,RUFY3,SIRT1,MACF1,SH3BP4,SGK3,SERTAD3,PLCE1,CRLF3,TRPV2,TAF9B,BC…
16_Member	GO Biological Processes	GO:0045926	negative regulation of growth	-18.6077	-16.4816	55/249	91,596,604,659,1026,1027,1029,1032,1654,2100,2931,3091,3304,3624,4089,4851,4853,5518,5538,5600,5641,5728,5795,5925,6595,6788,6789,7040,7048,7157,7473,7490,7528,7869,8408,8482,8751,8851,9043,9706,9792,10201,10507,11221,23411,23677,29946,51379,53335,54910,55558,55840,56920,65981,131566	ACVR1B,BCL2,BCL6,BMPR2,CDKN1A,CDKN1B,CDKN2A,CDKN2D,DDX3X,ESR2,GSK3A,HIF1A,HSPA1B,INHBA,SMAD4,NOTCH1,NOTCH2,PPP2R1A,PPT1,MAPK11,LGMN,PTEN,PTPRJ,RB1,SMARCA2,STK3,STK4,TGFB1,TGFBR2,TP53,WNT3,WT1,YY1,SEMA3B,ULK1,SEMA7A,ADAM15,CDK5R1,SPAG9,ULK2,SERTAD2,NME6,SEMA4D,DUSP10,SIRT1,SH3BP4,SERTAD3,CRLF3,BCL11A,SEMA4C,PLXNA3,EAF2,SEMA3G,CAPRIN2,DCBLD2
16_Member	GO Biological Processes	GO:0030308	negative regulation of cell growth	-16.763	-14.7525	45/188	91,596,604,659,1026,1027,1029,1032,1654,2100,2931,3304,3624,4089,5518,5538,5795,5925,6595,7040,7157,7473,7490,7528,7869,8408,8482,8751,8851,9043,9706,9792,10201,10507,23411,23677,29946,51379,53335,54910,55558,55840,56920,65981,131566	ACVR1B,BCL2,BCL6,BMPR2,CDKN1A,CDKN1B,CDKN2A,CDKN2D,DDX3X,ESR2,GSK3A,HSPA1B,INHBA,SMAD4,PPP2R1A,PPT1,PTPRJ,RB1,SMARCA2,TGFB1,TP53,WNT3,WT1,YY1,SEMA3B,ULK1,SEMA7A,ADAM15,CDK5R1,SPAG9,ULK2,SERTAD2,NME6,SEMA4D,SIRT1,SH3BP4,SERTAD3,CRLF3,BCL11A,SEMA4C,PLXNA3,EAF2,SEMA3G,CAPRIN2,DCBLD2
17_Summary	Reactome Gene Sets	R-HSA-9006934	Signaling by Receptor Tyrosine Kinases	-29.472	-26.6288	102/521	60,102,116,207,466,558,685,805,857,867,1175,1211,1278,1280,1385,1398,1399,1432,1445,1729,1839,1958,2069,2099,2152,2247,2252,2353,2889,3091,3265,3397,3398,3479,3480,3481,3673,3675,3685,3688,3690,3708,3710,3913,4067,4209,4486,4664,4893,4914,5155,5159,5170,5434,5518,5567,5578,5579,5594,5600,5725,5777,5795,5978,6233,6300,6455,6464,6678,6722,6774,7073,7316,7410,7422,7525,8061,8065,8074,8841,8851,9047,…	ACTB,ADAM10,ADCYAP1,AKT1,ATF1,AXL,BTC,CALM2,CAV1,CBL,AP2S1,CLTA,COL1A2,COL2A1,CREB1,CRK,CRKL,MAPK14,CSK,DIAPH1,HBEGF,EGR1,EREG,ESR1,F3,FGF2,FGF7,FOS,RAPGEF1,HIF1A,HRAS,ID1,ID2,IGF1,IGF1R,IGF2,ITGA2,ITGA3,ITGAV,ITGB1,ITGB3,ITPR1,ITPR3,LAMB2,LYN,MEF2D,MST1R,NAB1,NRAS,NTRK1,PDGFB,PDGFRB,PDPK1,POLR2E,PPP2R1A,PRKACB,PRKCA,PRKCB,MAPK1,MAPK11,PTBP1,PTPN6,PTPRJ,REST,RPS27A,MAPK12,SH3GL1,SHC1,SPARC,SRF,ST…
17_Member	Reactome Gene Sets	R-HSA-9006934	Signaling by Receptor Tyrosine Kinases	-29.472	-26.6288	102/521	60,102,116,207,466,558,685,805,857,867,1175,1211,1278,1280,1385,1398,1399,1432,1445,1729,1839,1958,2069,2099,2152,2247,2252,2353,2889,3091,3265,3397,3398,3479,3480,3481,3673,3675,3685,3688,3690,3708,3710,3913,4067,4209,4486,4664,4893,4914,5155,5159,5170,5434,5518,5567,5578,5579,5594,5600,5725,5777,5795,5978,6233,6300,6455,6464,6678,6722,6774,7073,7316,7410,7422,7525,8061,8065,8074,8841,8851,9047,…	ACTB,ADAM10,ADCYAP1,AKT1,ATF1,AXL,BTC,CALM2,CAV1,CBL,AP2S1,CLTA,COL1A2,COL2A1,CREB1,CRK,CRKL,MAPK14,CSK,DIAPH1,HBEGF,EGR1,EREG,ESR1,F3,FGF2,FGF7,FOS,RAPGEF1,HIF1A,HRAS,ID1,ID2,IGF1,IGF1R,IGF2,ITGA2,ITGA3,ITGAV,ITGB1,ITGB3,ITPR1,ITPR3,LAMB2,LYN,MEF2D,MST1R,NAB1,NRAS,NTRK1,PDGFB,PDGFRB,PDPK1,POLR2E,PPP2R1A,PRKACB,PRKCA,PRKCB,MAPK1,MAPK11,PTBP1,PTPN6,PTPRJ,REST,RPS27A,MAPK12,SH3GL1,SHC1,SPARC,SRF,ST…
17_Member	KEGG Pathway	hsa05205	Proteoglycans in cancer	-29.0207	-26.2153	64/218	60,207,286,355,356,595,815,857,867,960,1026,1432,1839,2099,2247,3091,3236,3265,3479,3480,3481,3569,3673,3685,3688,3690,3708,3710,4087,4193,4478,4893,5170,5293,5328,5336,5499,5500,5567,5578,5579,5594,5600,5777,6198,6199,6300,6548,6608,6774,7040,7157,7291,7410,7422,7473,7484,7837,8321,8322,8826,10818,22883,51196	ACTB,AKT1,ANK1,FAS,FASLG,CCND1,CAMK2A,CAV1,CBL,CD44,CDKN1A,MAPK14,HBEGF,ESR1,FGF2,HIF1A,HOXD10,HRAS,IGF1,IGF1R,IGF2,IL6,ITGA2,ITGAV,ITGB1,ITGB3,ITPR1,ITPR3,SMAD2,MDM2,MSN,NRAS,PDPK1,PIK3CD,PLAU,PLCG2,PPP1CA,PPP1CB,PRKACB,PRKCA,PRKCB,MAPK1,MAPK11,PTPN6,RPS6KB1,RPS6KB2,MAPK12,SLC9A1,SMO,STAT3,TGFB1,TP53,TWIST1,VAV2,VEGFA,WNT3,WNT9B,PXDN,FZD1,FZD4,IQGAP1,FRS2,CLSTN1,PLCE1
17_Member	KEGG Pathway	ko05205	Proteoglycans in cancer	-28.3056	-25.5237	61/203	60,207,286,355,356,595,815,857,867,960,1026,1432,1839,2099,2247,3091,3236,3265,3479,3480,3481,3673,3685,3688,3690,3708,3710,4087,4193,4478,4893,5170,5293,5328,5336,5499,5500,5567,5578,5579,5594,5600,5777,6198,6199,6300,6548,6608,6774,7040,7157,7291,7410,7422,7473,7484,8321,8322,8826,10818,51196	ACTB,AKT1,ANK1,FAS,FASLG,CCND1,CAMK2A,CAV1,CBL,CD44,CDKN1A,MAPK14,HBEGF,ESR1,FGF2,HIF1A,HOXD10,HRAS,IGF1,IGF1R,IGF2,ITGA2,ITGAV,ITGB1,ITGB3,ITPR1,ITPR3,SMAD2,MDM2,MSN,NRAS,PDPK1,PIK3CD,PLAU,PLCG2,PPP1CA,PPP1CB,PRKACB,PRKCA,PRKCB,MAPK1,MAPK11,PTPN6,RPS6KB1,RPS6KB2,MAPK12,SLC9A1,SMO,STAT3,TGFB1,TP53,TWIST1,VAV2,VEGFA,WNT3,WNT9B,FZD1,FZD4,IQGAP1,FRS2,PLCE1
17_Member	Reactome Gene Sets	R-HSA-4420097	VEGFA-VEGFR2 Pathway	-11.78	-10.1442	27/99	60,207,558,805,857,1398,1432,3265,3685,3690,3708,3710,4893,5170,5567,5578,5579,5600,6300,7410,7422,9047,10163,26999,57761,117145,253260	ACTB,AKT1,AXL,CALM2,CAV1,CRK,MAPK14,HRAS,ITGAV,ITGB3,ITPR1,ITPR3,NRAS,PDPK1,PRKACB,PRKCA,PRKCB,MAPK11,MAPK12,VAV2,VEGFA,SH2D2A,WASF2,CYFIP2,TRIB3,THEM4,RICTOR
17_Member	Reactome Gene Sets	R-HSA-194138	Signaling by VEGF	-10.8096	-9.24024	27/108	60,207,558,805,857,1398,1432,3265,3685,3690,3708,3710,4893,5170,5567,5578,5579,5600,6300,7410,7422,9047,10163,26999,57761,117145,253260	ACTB,AKT1,AXL,CALM2,CAV1,CRK,MAPK14,HRAS,ITGAV,ITGB3,ITPR1,ITPR3,NRAS,PDPK1,PRKACB,PRKCA,PRKCB,MAPK11,MAPK12,VAV2,VEGFA,SH2D2A,WASF2,CYFIP2,TRIB3,THEM4,RICTOR
18_Summary	GO Biological Processes	GO:0051090	regulation of DNA-binding transcription factor activity	-28.8575	-26.064	92/440	207,351,367,650,815,857,959,1029,1191,2099,2100,3169,3304,3383,3397,3398,3553,3556,3569,3586,3654,4092,4221,4591,4761,4793,4914,5292,5310,5336,5468,5579,5601,5621,5728,5740,5813,5925,6598,6608,6688,6722,6774,6788,6934,7001,7037,7098,7128,7185,7187,7291,7293,7334,7335,7341,7422,7804,8061,8321,8322,8887,8915,8986,9252,9830,9908,10293,10616,10891,11331,22900,23411,23678,51341,51588,54106,56998,57162…	AKT1,APP,AR,BMP2,CAMK2A,CAV1,CD40LG,CDKN2A,CLU,ESR1,ESR2,FOXA1,HSPA1B,ICAM1,ID1,ID2,IL1B,IL1RAP,IL6,IL10,IRAK1,SMAD7,MEN1,TRIM37,NEUROD2,NFKBIB,NTRK1,PIM1,PKD1,PLCG2,PPARG,PRKCB,MAPK9,PRNP,PTEN,PTGIS,PURA,RB1,SMARCB1,SMO,SPI1,SRF,STAT3,STK3,TCF7L2,PRDX2,TFRC,TLR3,TNFAIP3,TRAF1,TRAF3,TWIST1,TNFRSF4,UBE2N,UBE2V1,SUMO1,VEGFA,LRP8,FOSL1,FZD1,FZD4,TAX1BP1,BCL10,RPS6KA4,RPS6KA5,TRIM14,G3BP2,TRAIP,RBCK1…
18_Member	GO Biological Processes	GO:0051090	regulation of DNA-binding transcription factor activity	-28.8575	-26.064	92/440	207,351,367,650,815,857,959,1029,1191,2099,2100,3169,3304,3383,3397,3398,3553,3556,3569,3586,3654,4092,4221,4591,4761,4793,4914,5292,5310,5336,5468,5579,5601,5621,5728,5740,5813,5925,6598,6608,6688,6722,6774,6788,6934,7001,7037,7098,7128,7185,7187,7291,7293,7334,7335,7341,7422,7804,8061,8321,8322,8887,8915,8986,9252,9830,9908,10293,10616,10891,11331,22900,23411,23678,51341,51588,54106,56998,57162…	AKT1,APP,AR,BMP2,CAMK2A,CAV1,CD40LG,CDKN2A,CLU,ESR1,ESR2,FOXA1,HSPA1B,ICAM1,ID1,ID2,IL1B,IL1RAP,IL6,IL10,IRAK1,SMAD7,MEN1,TRIM37,NEUROD2,NFKBIB,NTRK1,PIM1,PKD1,PLCG2,PPARG,PRKCB,MAPK9,PRNP,PTEN,PTGIS,PURA,RB1,SMARCB1,SMO,SPI1,SRF,STAT3,STK3,TCF7L2,PRDX2,TFRC,TLR3,TNFAIP3,TRAF1,TRAF3,TWIST1,TNFRSF4,UBE2N,UBE2V1,SUMO1,VEGFA,LRP8,FOSL1,FZD1,FZD4,TAX1BP1,BCL10,RPS6KA4,RPS6KA5,TRIM14,G3BP2,TRAIP,RBCK1…
18_Member	GO Biological Processes	GO:0007249	I-kappaB kinase/NF-kappaB signaling	-18.7747	-16.6331	59/281	207,356,389,1894,2099,2149,2150,2280,3553,3654,5170,5336,5494,5579,5966,6095,6398,7037,7098,7128,7185,7187,7329,7334,7335,8795,8915,9370,9830,9971,10010,10342,10616,10758,10771,22900,23411,28512,51135,51284,54106,55179,56674,57162,57506,58509,64127,79931,81603,92140,92610,114609,140885,153090,171392,222068,257397,353376,653519	AKT1,FASLG,RHOC,ECT2,ESR1,F2R,F2RL1,FKBP1A,IL1B,IRAK1,PDPK1,PLCG2,PPM1A,PRKCB,REL,RORA,SECTM1,TFRC,TLR3,TNFAIP3,TRAF1,TRAF3,UBE2I,UBE2N,UBE2V1,TNFRSF10B,BCL10,ADIPOQ,TRIM14,NR1H4,TANK,TFG,RBCK1,TRAF3IP2,ZMYND11,CARD8,SIRT1,NKIRAS1,IRAK4,TLR7,TLR9,FAIM,TMEM9B,PELI1,MAVS,CACTIN,NOD2,TNIP3,TRIM8,MTDH,TIFA,TIRAP,SIRPA,DAB2IP,ZNF675,TMED4,TAB3,TICAM2,GPR89A
18_Member	GO Biological Processes	GO:0051091	positive regulation of DNA-binding transcription factor activity	-17.6997	-15.6217	55/260	207,351,367,650,815,857,959,1191,2099,2100,3169,3304,3383,3553,3556,3569,3586,3654,4591,4761,4914,5336,5468,5579,5728,6598,6608,6722,6774,6788,7037,7098,7185,7334,7335,7422,7804,8061,8321,8322,8915,8986,9252,9830,10616,10891,11331,51341,54106,57506,64127,81603,92140,114609,150372	AKT1,APP,AR,BMP2,CAMK2A,CAV1,CD40LG,CLU,ESR1,ESR2,FOXA1,HSPA1B,ICAM1,IL1B,IL1RAP,IL6,IL10,IRAK1,TRIM37,NEUROD2,NTRK1,PLCG2,PPARG,PRKCB,PTEN,SMARCB1,SMO,SRF,STAT3,STK3,TFRC,TLR3,TRAF1,UBE2N,UBE2V1,VEGFA,LRP8,FOSL1,FZD1,FZD4,BCL10,RPS6KA4,RPS6KA5,TRIM14,RBCK1,PPARGC1A,PHB2,ZBTB7A,TLR9,MAVS,NOD2,TRIM8,MTDH,TIRAP,NFAM1
18_Member	GO Biological Processes	GO:0043122	regulation of I-kappaB kinase/NF-kappaB signaling	-17.2038	-15.1453	53/249	356,389,1894,2099,2149,2150,2280,3553,3654,5170,5336,5494,5579,5966,6095,6398,7037,7098,7128,7185,7187,7329,7334,7335,8795,8915,9370,9830,9971,10010,10342,10616,10758,10771,22900,23411,51135,54106,56674,57162,57506,58509,64127,79931,81603,92140,92610,114609,153090,222068,257397,353376,653519	FASLG,RHOC,ECT2,ESR1,F2R,F2RL1,FKBP1A,IL1B,IRAK1,PDPK1,PLCG2,PPM1A,PRKCB,REL,RORA,SECTM1,TFRC,TLR3,TNFAIP3,TRAF1,TRAF3,UBE2I,UBE2N,UBE2V1,TNFRSF10B,BCL10,ADIPOQ,TRIM14,NR1H4,TANK,TFG,RBCK1,TRAF3IP2,ZMYND11,CARD8,SIRT1,IRAK4,TLR9,TMEM9B,PELI1,MAVS,CACTIN,NOD2,TNIP3,TRIM8,MTDH,TIFA,TIRAP,DAB2IP,TMED4,TAB3,TICAM2,GPR89A
18_Member	GO Biological Processes	GO:0043123	positive regulation of I-kappaB kinase/NF-kappaB signaling	-11.2832	-9.68344	37/186	356,389,1894,2149,2150,2280,3654,5494,5579,5966,6398,7037,7098,7329,7334,7335,8795,8915,9370,9830,10342,10616,10758,51135,54106,56674,57162,57506,64127,81603,92140,92610,114609,222068,257397,353376,653519	FASLG,RHOC,ECT2,F2R,F2RL1,FKBP1A,IRAK1,PPM1A,PRKCB,REL,SECTM1,TFRC,TLR3,UBE2I,UBE2N,UBE2V1,TNFRSF10B,BCL10,ADIPOQ,TRIM14,TFG,RBCK1,TRAF3IP2,IRAK4,TLR9,TMEM9B,PELI1,MAVS,NOD2,TRIM8,MTDH,TIFA,TIRAP,TMED4,TAB3,TICAM2,GPR89A
18_Member	GO Biological Processes	GO:0051092	positive regulation of NF-kappaB transcription factor activity	-11.1388	-9.5451	33/153	351,367,815,857,959,1191,3304,3383,3553,3556,3569,3654,4591,4914,5336,5579,6774,7037,7098,7185,7334,7335,8915,8986,9252,9830,10616,51341,54106,64127,81603,92140,114609	APP,AR,CAMK2A,CAV1,CD40LG,CLU,HSPA1B,ICAM1,IL1B,IL1RAP,IL6,IRAK1,TRIM37,NTRK1,PLCG2,PRKCB,STAT3,TFRC,TLR3,TRAF1,UBE2N,UBE2V1,BCL10,RPS6KA4,RPS6KA5,TRIM14,RBCK1,ZBTB7A,TLR9,NOD2,TRIM8,MTDH,TIRAP
19_Summary	GO Biological Processes	GO:0008285	negative regulation of cell population proliferation	-27.4077	-24.648	125/779	116,324,350,351,367,472,567,578,596,604,650,659,675,857,864,1012,1026,1027,1029,1032,1445,1487,1488,1718,1869,1871,2069,2149,2247,2627,2765,2768,2796,2810,3159,3265,3304,3516,3553,3569,3586,3600,3611,3624,4067,4087,4089,4091,4092,4163,4194,4221,4654,4771,4781,4804,4851,4914,5074,5468,5573,5600,5621,5728,5777,5795,5915,5925,5978,6497,6595,6598,6648,6659,6678,6722,6774,6788,6789,7040,7048,7071,7073…	ADCYAP1,APC,APOH,APP,AR,ATM,B2M,BAK1,BCL2,BCL6,BMP2,BMPR2,BRCA2,CAV1,RUNX3,CDH13,CDKN1A,CDKN1B,CDKN2A,CDKN2D,CSK,CTBP1,CTBP2,DHCR24,E2F1,E2F3,EREG,F2R,FGF2,GATA6,GML,GNA12,GNRH1,SFN,HMGA1,HRAS,HSPA1B,RBPJ,IL1B,IL6,IL10,IL15,ILK,INHBA,LYN,SMAD2,SMAD4,SMAD6,SMAD7,MCC,MDM4,MEN1,MYOD1,NF2,NFIB,NGFR,NOTCH1,NTRK1,PAWR,PPARG,PRKAR1A,MAPK11,PRNP,PTEN,PTPN6,PTPRJ,RARB,RB1,REST,SKI,SMARCA2,SMARCB1,SOD2,SOX…
19_Member	GO Biological Processes	GO:0008285	negative regulation of cell population proliferation	-27.4077	-24.648	125/779	116,324,350,351,367,472,567,578,596,604,650,659,675,857,864,1012,1026,1027,1029,1032,1445,1487,1488,1718,1869,1871,2069,2149,2247,2627,2765,2768,2796,2810,3159,3265,3304,3516,3553,3569,3586,3600,3611,3624,4067,4087,4089,4091,4092,4163,4194,4221,4654,4771,4781,4804,4851,4914,5074,5468,5573,5600,5621,5728,5777,5795,5915,5925,5978,6497,6595,6598,6648,6659,6678,6722,6774,6788,6789,7040,7048,7071,7073…	ADCYAP1,APC,APOH,APP,AR,ATM,B2M,BAK1,BCL2,BCL6,BMP2,BMPR2,BRCA2,CAV1,RUNX3,CDH13,CDKN1A,CDKN1B,CDKN2A,CDKN2D,CSK,CTBP1,CTBP2,DHCR24,E2F1,E2F3,EREG,F2R,FGF2,GATA6,GML,GNA12,GNRH1,SFN,HMGA1,HRAS,HSPA1B,RBPJ,IL1B,IL6,IL10,IL15,ILK,INHBA,LYN,SMAD2,SMAD4,SMAD6,SMAD7,MCC,MDM4,MEN1,MYOD1,NF2,NFIB,NGFR,NOTCH1,NTRK1,PAWR,PPARG,PRKAR1A,MAPK11,PRNP,PTEN,PTPN6,PTPRJ,RARB,RB1,REST,SKI,SMARCA2,SMARCB1,SOD2,SOX…
19_Member	GO Biological Processes	GO:0050680	negative regulation of epithelial cell proliferation	-6.02953	-4.85871	26/165	350,367,567,675,857,864,1027,2069,2810,4163,4221,4781,4804,5468,5728,5925,6678,7040,9788,11221,11331,23512,55840,57152,93974,153090	APOH,AR,B2M,BRCA2,CAV1,RUNX3,CDKN1B,EREG,SFN,MCC,MEN1,NFIB,NGFR,PPARG,PTEN,RB1,SPARC,TGFB1,MTSS1,DUSP10,PHB2,SUZ12,EAF2,SLURP1,ATP5IF1,DAB2IP
20_Summary	GO Biological Processes	GO:0009611	response to wounding	-27.3383	-24.5893	102/552	60,350,389,538,558,596,667,857,949,953,954,959,960,1026,1192,1230,1398,1432,1543,1839,2069,2149,2150,2151,2152,2247,2252,2677,2768,2776,2903,3091,3146,3265,3479,3569,3572,3586,3611,3624,3673,3688,3690,3913,3998,4067,4087,4162,4627,4747,4853,4914,5051,5054,5155,5159,5328,5336,5578,5728,5754,5777,5792,5873,6239,6416,6556,6678,6722,7001,7035,7040,7048,7056,7094,7128,7294,7301,7410,7422,7538,8527,876…	ACTB,APOH,RHOC,ATP7A,AXL,BCL2,DST,CAV1,SCARB1,ENTPD1,ENTPD2,CD40LG,CD44,CDKN1A,CLIC1,CCR1,CRK,MAPK14,CYP1A1,HBEGF,EREG,F2R,F2RL1,F2RL2,F3,FGF2,FGF7,GGCX,GNA12,GNAQ,GRIN2A,HIF1A,HMGB1,HRAS,IGF1,IL6,IL6ST,IL10,ILK,INHBA,ITGA2,ITGB1,ITGB3,LAMB2,LMAN1,LYN,SMAD2,MCAM,MYH9,NEFL,NOTCH2,NTRK1,PAFAH2,SERPINE1,PDGFB,PDGFRB,PLAU,PLCG2,PRKCA,PTEN,PTK7,PTPN6,PTPRF,RAB27A,RREB1,MAP2K4,SLC11A1,SPARC,SRF,PRDX2,T…
20_Member	GO Biological Processes	GO:0009611	response to wounding	-27.3383	-24.5893	102/552	60,350,389,538,558,596,667,857,949,953,954,959,960,1026,1192,1230,1398,1432,1543,1839,2069,2149,2150,2151,2152,2247,2252,2677,2768,2776,2903,3091,3146,3265,3479,3569,3572,3586,3611,3624,3673,3688,3690,3913,3998,4067,4087,4162,4627,4747,4853,4914,5051,5054,5155,5159,5328,5336,5578,5728,5754,5777,5792,5873,6239,6416,6556,6678,6722,7001,7035,7040,7048,7056,7094,7128,7294,7301,7410,7422,7538,8527,876…	ACTB,APOH,RHOC,ATP7A,AXL,BCL2,DST,CAV1,SCARB1,ENTPD1,ENTPD2,CD40LG,CD44,CDKN1A,CLIC1,CCR1,CRK,MAPK14,CYP1A1,HBEGF,EREG,F2R,F2RL1,F2RL2,F3,FGF2,FGF7,GGCX,GNA12,GNAQ,GRIN2A,HIF1A,HMGB1,HRAS,IGF1,IL6,IL6ST,IL10,ILK,INHBA,ITGA2,ITGB1,ITGB3,LAMB2,LMAN1,LYN,SMAD2,MCAM,MYH9,NEFL,NOTCH2,NTRK1,PAFAH2,SERPINE1,PDGFB,PDGFRB,PLAU,PLCG2,PRKCA,PTEN,PTK7,PTPN6,PTPRF,RAB27A,RREB1,MAP2K4,SLC11A1,SPARC,SRF,PRDX2,T…
20_Member	GO Biological Processes	GO:0042060	wound healing	-24.6876	-22.0967	84/424	60,350,389,558,667,857,949,953,954,959,960,1026,1192,1398,1432,1839,2069,2149,2150,2151,2152,2247,2677,2768,2776,3091,3146,3265,3479,3569,3572,3611,3673,3688,3690,3998,4067,4087,4162,4627,4853,5051,5054,5155,5159,5328,5336,5578,5728,5754,5777,5873,6239,6556,6678,6722,7001,7035,7040,7048,7056,7094,7128,7294,7301,7410,7422,8527,8761,9002,10019,10565,11093,23499,50848,51330,55612,57175,131566,149461…	ACTB,APOH,RHOC,AXL,DST,CAV1,SCARB1,ENTPD1,ENTPD2,CD40LG,CD44,CDKN1A,CLIC1,CRK,MAPK14,HBEGF,EREG,F2R,F2RL1,F2RL2,F3,FGF2,GGCX,GNA12,GNAQ,HIF1A,HMGB1,HRAS,IGF1,IL6,IL6ST,ILK,ITGA2,ITGB1,ITGB3,LMAN1,LYN,SMAD2,MCAM,MYH9,NOTCH2,PAFAH2,SERPINE1,PDGFB,PDGFRB,PLAU,PLCG2,PRKCA,PTEN,PTK7,PTPN6,RAB27A,RREB1,SLC11A1,SPARC,SRF,PRDX2,TFPI,TGFB1,TGFBR2,THBD,TLN1,TNFAIP3,TXK,TYRO3,VAV2,VEGFA,DGKD,PABPC4,F2RL3,SH…
20_Member	GO Biological Processes	GO:0050878	regulation of body fluid levels	-17.4724	-15.4074	68/382	60,350,538,551,558,595,685,857,953,954,959,1192,1385,1432,1723,2149,2150,2151,2152,2677,2768,2771,2776,2810,3037,3091,3569,3572,3611,3673,3690,3998,4067,4627,5020,5051,5054,5155,5328,5336,5567,5578,5777,5873,6722,7001,7035,7056,7094,7294,7301,7357,7410,7422,8527,8761,9002,9612,10019,10758,11093,11215,50848,64834,65125,196527,375033,388552	ACTB,APOH,ATP7A,AVP,AXL,CCND1,BTC,CAV1,ENTPD1,ENTPD2,CD40LG,CLIC1,CREB1,MAPK14,DHODH,F2R,F2RL1,F2RL2,F3,GGCX,GNA12,GNAI2,GNAQ,SFN,HAS2,HIF1A,IL6,IL6ST,ILK,ITGA2,ITGB3,LMAN1,LYN,MYH9,OXT,PAFAH2,SERPINE1,PDGFB,PLAU,PLCG2,PRKACB,PRKCA,PTPN6,RAB27A,SRF,PRDX2,TFPI,THBD,TLN1,TXK,TYRO3,UGCG,VAV2,VEGFA,DGKD,PABPC4,F2RL3,NCOR2,SH2B3,TRAF3IP2,ADAMTS13,AKAP11,F11R,ELOVL1,WNK1,ANO6,PEAR1,BLOC1S3
20_Member	GO Biological Processes	GO:0007596	blood coagulation	-16.98	-14.9446	49/218	60,350,558,857,953,954,959,1192,1432,2149,2150,2151,2152,2677,2768,2776,3569,3572,3611,3673,3690,3998,4067,4627,5051,5054,5155,5328,5336,5578,5777,5873,6722,7001,7035,7056,7094,7294,7301,7410,8527,8761,9002,10019,11093,50848,196527,375033,388552	ACTB,APOH,AXL,CAV1,ENTPD1,ENTPD2,CD40LG,CLIC1,MAPK14,F2R,F2RL1,F2RL2,F3,GGCX,GNA12,GNAQ,IL6,IL6ST,ILK,ITGA2,ITGB3,LMAN1,LYN,MYH9,PAFAH2,SERPINE1,PDGFB,PLAU,PLCG2,PRKCA,PTPN6,RAB27A,SRF,PRDX2,TFPI,THBD,TLN1,TXK,TYRO3,VAV2,DGKD,PABPC4,F2RL3,SH2B3,ADAMTS13,F11R,ANO6,PEAR1,BLOC1S3
20_Member	GO Biological Processes	GO:0007599	hemostasis	-16.5506	-14.5468	49/223	60,350,558,857,953,954,959,1192,1432,2149,2150,2151,2152,2677,2768,2776,3569,3572,3611,3673,3690,3998,4067,4627,5051,5054,5155,5328,5336,5578,5777,5873,6722,7001,7035,7056,7094,7294,7301,7410,8527,8761,9002,10019,11093,50848,196527,375033,388552	ACTB,APOH,AXL,CAV1,ENTPD1,ENTPD2,CD40LG,CLIC1,MAPK14,F2R,F2RL1,F2RL2,F3,GGCX,GNA12,GNAQ,IL6,IL6ST,ILK,ITGA2,ITGB3,LMAN1,LYN,MYH9,PAFAH2,SERPINE1,PDGFB,PLAU,PLCG2,PRKCA,PTPN6,RAB27A,SRF,PRDX2,TFPI,THBD,TLN1,TXK,TYRO3,VAV2,DGKD,PABPC4,F2RL3,SH2B3,ADAMTS13,F11R,ANO6,PEAR1,BLOC1S3
20_Member	GO Biological Processes	GO:0050817	coagulation	-16.5506	-14.5468	49/223	60,350,558,857,953,954,959,1192,1432,2149,2150,2151,2152,2677,2768,2776,3569,3572,3611,3673,3690,3998,4067,4627,5051,5054,5155,5328,5336,5578,5777,5873,6722,7001,7035,7056,7094,7294,7301,7410,8527,8761,9002,10019,11093,50848,196527,375033,388552	ACTB,APOH,AXL,CAV1,ENTPD1,ENTPD2,CD40LG,CLIC1,MAPK14,F2R,F2RL1,F2RL2,F3,GGCX,GNA12,GNAQ,IL6,IL6ST,ILK,ITGA2,ITGB3,LMAN1,LYN,MYH9,PAFAH2,SERPINE1,PDGFB,PLAU,PLCG2,PRKCA,PTPN6,RAB27A,SRF,PRDX2,TFPI,THBD,TLN1,TXK,TYRO3,VAV2,DGKD,PABPC4,F2RL3,SH2B3,ADAMTS13,F11R,ANO6,PEAR1,BLOC1S3
20_Member	GO Biological Processes	GO:0030168	platelet activation	-12.3074	-10.6169	31/124	60,558,954,959,1192,1432,2149,2151,3569,3572,3611,3690,4067,4627,5155,5336,5578,5777,6722,7056,7094,7294,7301,7410,8527,9002,10019,11093,50848,375033,388552	ACTB,AXL,ENTPD2,CD40LG,CLIC1,MAPK14,F2R,F2RL2,IL6,IL6ST,ILK,ITGB3,LYN,MYH9,PDGFB,PLCG2,PRKCA,PTPN6,SRF,THBD,TLN1,TXK,TYRO3,VAV2,DGKD,F2RL3,SH2B3,ADAMTS13,F11R,PEAR1,BLOC1S3
20_Member	GO Biological Processes	GO:0070527	platelet aggregation	-5.55493	-4.43651	15/68	60,1192,3569,3572,3611,3690,4067,4627,5578,5777,7094,7301,10019,50848,375033	ACTB,CLIC1,IL6,IL6ST,ILK,ITGB3,LYN,MYH9,PRKCA,PTPN6,TLN1,TYRO3,SH2B3,F11R,PEAR1

## Sheet: CL2 Enrichment
GroupID	Category	Term	Description	LogP	Log(q-value)	InTerm_InList	Genes	Symbols
1_Summary	Reactome Gene Sets	R-HSA-1280215	Cytokine Signaling in Immune system	-58.9272	-54.5655	186/715	27,103,207,332,351,356,596,818,829,867,920,942,1026,1027,1234,1278,1385,1432,1435,1846,1848,1958,1973,1977,2247,2309,2316,2353,2357,2537,2885,2889,3082,3106,3107,3146,3265,3312,3320,3454,3456,3458,3459,3552,3566,3569,3570,3572,3595,3606,3659,3662,3687,3688,3725,3836,3837,3838,3839,3840,3845,3976,3977,4001,4067,4170,4215,4318,4502,4582,4609,4843,4893,4982,5292,5293,5295,5371,5451,5478,5528,5580,55…	ABL2,ADAR,AKT1,BIRC5,APP,FASLG,BCL2,CAMK2G,CAPZA1,CBL,CD4,CD86,CDKN1A,CDKN1B,CCR5,COL1A2,CREB1,MAPK14,CSF1,DUSP4,DUSP6,EGR1,EIF4A1,EIF4E,FGF2,FOXO3,FLNA,FOS,FPR1,IFI6,GRB2,RAPGEF1,HGF,HLA-B,HLA-C,HMGB1,HRAS,HSPA8,HSP90AA1,IFNAR1,IFNB1,IFNG,IFNGR1,IL1A,IL4R,IL6,IL6R,IL6ST,IL12RB2,IL18,IRF1,IRF4,ITGAX,ITGB1,JUN,KPNA1,KPNB1,KPNA2,KPNA3,KPNA4,KRAS,LIF,LIFR,LMNB1,LYN,MCL1,MAP3K3,MMP9,MT2A,MUC1,MYC,NOS…
1_Member	Reactome Gene Sets	R-HSA-1280215	Cytokine Signaling in Immune system	-58.9272	-54.5655	186/715	27,103,207,332,351,356,596,818,829,867,920,942,1026,1027,1234,1278,1385,1432,1435,1846,1848,1958,1973,1977,2247,2309,2316,2353,2357,2537,2885,2889,3082,3106,3107,3146,3265,3312,3320,3454,3456,3458,3459,3552,3566,3569,3570,3572,3595,3606,3659,3662,3687,3688,3725,3836,3837,3838,3839,3840,3845,3976,3977,4001,4067,4170,4215,4318,4502,4582,4609,4843,4893,4982,5292,5293,5295,5371,5451,5478,5528,5580,55…	ABL2,ADAR,AKT1,BIRC5,APP,FASLG,BCL2,CAMK2G,CAPZA1,CBL,CD4,CD86,CDKN1A,CDKN1B,CCR5,COL1A2,CREB1,MAPK14,CSF1,DUSP4,DUSP6,EGR1,EIF4A1,EIF4E,FGF2,FOXO3,FLNA,FOS,FPR1,IFI6,GRB2,RAPGEF1,HGF,HLA-B,HLA-C,HMGB1,HRAS,HSPA8,HSP90AA1,IFNAR1,IFNB1,IFNG,IFNGR1,IL1A,IL4R,IL6,IL6R,IL6ST,IL12RB2,IL18,IRF1,IRF4,ITGAX,ITGB1,JUN,KPNA1,KPNB1,KPNA2,KPNA3,KPNA4,KRAS,LIF,LIFR,LMNB1,LYN,MCL1,MAP3K3,MMP9,MT2A,MUC1,MYC,NOS…
1_Member	Reactome Gene Sets	R-HSA-449147	Signaling by Interleukins	-42.0929	-39.0534	126/462	207,332,351,356,596,829,867,920,942,1026,1234,1278,1385,1432,1435,1846,1848,2247,2309,2353,2357,2885,2889,3082,3146,3312,3320,3458,3552,3566,3569,3570,3572,3595,3606,3662,3687,3688,3725,3976,3977,4001,4067,4170,4215,4318,4582,4609,4843,5292,5293,5295,5451,5478,5528,5594,5604,5606,5683,5684,5692,5693,5700,5702,5709,5710,5719,5720,5721,5743,5775,5777,5781,5783,5896,5898,5908,6197,6233,6367,6416,646…	AKT1,BIRC5,APP,FASLG,BCL2,CAPZA1,CBL,CD4,CD86,CDKN1A,CCR5,COL1A2,CREB1,MAPK14,CSF1,DUSP4,DUSP6,FGF2,FOXO3,FOS,FPR1,GRB2,RAPGEF1,HGF,HMGB1,HSPA8,HSP90AA1,IFNG,IL1A,IL4R,IL6,IL6R,IL6ST,IL12RB2,IL18,IRF4,ITGAX,ITGB1,JUN,LIF,LIFR,LMNB1,LYN,MCL1,MAP3K3,MMP9,MUC1,MYC,NOS2,PIM1,PIK3CD,PIK3R1,POU2F1,PPIA,PPP2R5D,MAPK1,MAP2K1,MAP2K3,PSMA2,PSMA3,PSMB4,PSMB5,PSMC1,PSMC3,PSMD3,PSMD4,PSMD13,PSME1,PSME2,PTGS2,…
1_Member	Reactome Gene Sets	R-HSA-6785807	Interleukin-4 and Interleukin-13 signaling	-21.8237	-19.8275	43/108	207,332,356,596,1026,1278,2247,2309,2353,3082,3312,3320,3552,3566,3569,3570,3606,3662,3687,3688,3976,4170,4318,4582,4609,4843,5292,5295,5451,5743,6367,6772,6774,7040,7076,7124,7157,7184,7291,7412,7422,7431,149233	AKT1,BIRC5,FASLG,BCL2,CDKN1A,COL1A2,FGF2,FOXO3,FOS,HGF,HSPA8,HSP90AA1,IL1A,IL4R,IL6,IL6R,IL18,IRF4,ITGAX,ITGB1,LIF,MCL1,MMP9,MUC1,MYC,NOS2,PIM1,PIK3R1,POU2F1,PTGS2,CCL22,STAT1,STAT3,TGFB1,TIMP1,TNF,TP53,HSP90B1,TWIST1,VCAM1,VEGFA,VIM,IL23R
2_Summary	GO Biological Processes	GO:0097190	apoptotic signaling pathway	-54.8191	-50.7585	161/582	90,142,207,292,356,367,409,472,578,581,596,599,637,648,653,665,672,1026,1191,1457,1499,1540,1545,1612,1616,1654,1869,1870,1969,1984,2023,2033,2065,2081,2260,2309,2395,2537,2773,2810,2872,2876,2907,2932,2956,3082,3094,3148,3265,3303,3304,3456,3458,3479,3552,3570,3624,3708,3725,4150,4170,4193,4217,4292,4318,4487,4582,4846,5027,5074,5196,5295,5326,5366,5371,5478,5580,5728,5743,5770,5925,6154,6201,62…	ACVR1,PARP1,AKT1,SLC25A5,FASLG,AR,ARRB2,ATM,BAK1,BAX,BCL2,BCL2L2,BID,BMI1,BMP5,BNIP3L,BRCA1,CDKN1A,CLU,CSNK2A1,CTNNB1,CYLD,CYP1B1,DAPK1,DAXX,DDX3X,E2F1,E2F2,EPHA2,EIF5A,ENO1,EP300,ERBB3,ERN1,FGFR1,FOXO3,FXN,IFI6,GNAI3,SFN,MKNK2,GPX1,GRINA,GSK3B,MSH6,HGF,HINT1,HMGB2,HRAS,HSPA1A,HSPA1B,IFNB1,IFNG,IGF1,IL1A,IL6R,INHBA,ITPR1,JUN,MAZ,MCL1,MDM2,MAP3K5,MLH1,MMP9,MSX1,MUC1,NOS3,P2RX7,PAWR,PF4,PIK3R1,PLAG…
2_Member	GO Biological Processes	GO:0097190	apoptotic signaling pathway	-54.8191	-50.7585	161/582	90,142,207,292,356,367,409,472,578,581,596,599,637,648,653,665,672,1026,1191,1457,1499,1540,1545,1612,1616,1654,1869,1870,1969,1984,2023,2033,2065,2081,2260,2309,2395,2537,2773,2810,2872,2876,2907,2932,2956,3082,3094,3148,3265,3303,3304,3456,3458,3479,3552,3570,3624,3708,3725,4150,4170,4193,4217,4292,4318,4487,4582,4846,5027,5074,5196,5295,5326,5366,5371,5478,5580,5728,5743,5770,5925,6154,6201,62…	ACVR1,PARP1,AKT1,SLC25A5,FASLG,AR,ARRB2,ATM,BAK1,BAX,BCL2,BCL2L2,BID,BMI1,BMP5,BNIP3L,BRCA1,CDKN1A,CLU,CSNK2A1,CTNNB1,CYLD,CYP1B1,DAPK1,DAXX,DDX3X,E2F1,E2F2,EPHA2,EIF5A,ENO1,EP300,ERBB3,ERN1,FGFR1,FOXO3,FXN,IFI6,GNAI3,SFN,MKNK2,GPX1,GRINA,GSK3B,MSH6,HGF,HINT1,HMGB2,HRAS,HSPA1A,HSPA1B,IFNB1,IFNG,IGF1,IL1A,IL6R,INHBA,ITPR1,JUN,MAZ,MCL1,MDM2,MAP3K5,MLH1,MMP9,MSX1,MUC1,NOS3,P2RX7,PAWR,PF4,PIK3R1,PLAG…
2_Member	GO Biological Processes	GO:0097193	intrinsic apoptotic signaling pathway	-33.5745	-30.961	88/288	142,207,472,578,581,596,599,637,672,1026,1191,1540,1545,1654,1869,1870,1969,1984,2023,2033,2081,2537,2810,2876,2907,2956,3094,3265,3303,3708,4170,4193,4217,4292,4318,4487,4582,5295,5326,5366,5371,5478,5580,5743,5770,6154,6201,6421,6498,6647,6648,7009,7124,7157,7159,7186,7314,7417,7494,7917,8065,8445,8452,8795,8996,9529,9709,10018,10059,10131,10494,10955,11200,11235,23411,23612,27113,28996,51246,5…	PARP1,AKT1,ATM,BAK1,BAX,BCL2,BCL2L2,BID,BRCA1,CDKN1A,CLU,CYLD,CYP1B1,DDX3X,E2F1,E2F2,EPHA2,EIF5A,ENO1,EP300,ERN1,IFI6,SFN,GPX1,GRINA,MSH6,HINT1,HRAS,HSPA1A,ITPR1,MCL1,MDM2,MAP3K5,MLH1,MMP9,MSX1,MUC1,PIK3R1,PLAGL2,PMAIP1,PML,PPIA,PRKCD,PTGS2,PTPN1,RPL26,RPS7,SFPQ,SKIL,SOD1,SOD2,TMBIM6,TNF,TP53,TP53BP2,TRAF2,UBB,VDAC2,XBP1,BAG6,CUL5,DYRK2,CUL3,TNFRSF10B,NOL3,BAG5,HERPUD1,BCL2L11,DNM1L,TRAP1,STK25,S…
2_Member	GO Biological Processes	GO:2001242	regulation of intrinsic apoptotic signaling pathway	-15.4887	-13.8602	45/164	142,207,581,596,599,637,1191,1540,1654,1984,2023,2876,2907,3303,4170,4193,4318,4487,4582,5326,5366,5478,5743,5770,6154,6201,6421,6498,6647,6648,7009,7157,7314,7417,7494,8996,9529,9709,10018,10059,10131,10955,23411,27113,84447	PARP1,AKT1,BAX,BCL2,BCL2L2,BID,CLU,CYLD,DDX3X,EIF5A,ENO1,GPX1,GRINA,HSPA1A,MCL1,MDM2,MMP9,MSX1,MUC1,PLAGL2,PMAIP1,PPIA,PTGS2,PTPN1,RPL26,RPS7,SFPQ,SKIL,SOD1,SOD2,TMBIM6,TP53,UBB,VDAC2,XBP1,NOL3,BAG5,HERPUD1,BCL2L11,DNM1L,TRAP1,SERINC3,SIRT1,BBC3,SYVN1
2_Member	GO Biological Processes	GO:2001235	positive regulation of apoptotic signaling pathway	-10.9428	-9.58309	33/126	581,637,1540,1984,3456,3624,4170,4487,5326,5366,5371,5580,5728,6154,6201,6421,6498,6647,6789,7046,7124,7157,7186,7314,8743,8915,10018,10059,10955,23411,27113,51330,51741	BAX,BID,CYLD,EIF5A,IFNB1,INHBA,MCL1,MSX1,PLAGL2,PMAIP1,PML,PRKCD,PTEN,RPL26,RPS7,SFPQ,SKIL,SOD1,STK4,TGFBR1,TNF,TP53,TRAF2,UBB,TNFSF10,BCL10,BCL2L11,DNM1L,SERINC3,SIRT1,BBC3,TNFRSF12A,WWOX
2_Member	GO Biological Processes	GO:2001243	negative regulation of intrinsic apoptotic signaling pathway	-9.62128	-8.34947	27/98	207,596,599,637,1191,1654,2023,2876,2907,3303,4170,4193,4318,4582,5478,5743,5770,6648,7009,7417,7494,8996,9529,9709,10131,23411,84447	AKT1,BCL2,BCL2L2,BID,CLU,DDX3X,ENO1,GPX1,GRINA,HSPA1A,MCL1,MDM2,MMP9,MUC1,PPIA,PTGS2,PTPN1,SOD2,TMBIM6,VDAC2,XBP1,NOL3,BAG5,HERPUD1,TRAP1,SIRT1,SYVN1
2_Member	GO Biological Processes	GO:2001244	positive regulation of intrinsic apoptotic signaling pathway	-8.34003	-7.15296	19/58	581,637,1984,4170,4487,5326,5366,6154,6201,6421,6498,6647,7157,7314,10018,10059,10955,23411,27113	BAX,BID,EIF5A,MCL1,MSX1,PLAGL2,PMAIP1,RPL26,RPS7,SFPQ,SKIL,SOD1,TP53,UBB,BCL2L11,DNM1L,SERINC3,SIRT1,BBC3
3_Summary	GO Biological Processes	GO:0070848	response to growth factor	-53.4999	-49.8036	179/720	90,94,142,207,285,331,351,356,382,409,650,653,655,657,659,678,847,864,867,890,1028,1277,1278,1385,1432,1490,1499,1783,1785,1848,1869,1906,1915,1938,1956,1958,1969,2022,2033,2064,2081,2241,2246,2247,2254,2260,2280,2296,2309,2339,2353,2530,2627,2648,2734,2889,3037,3077,3082,3096,3175,3209,3303,3340,3516,3611,3675,3678,3688,3690,3696,3725,4086,4087,4089,4090,4092,4193,4221,4487,4504,4609,4641,4756,4…	ACVR1,ACVRL1,PARP1,AKT1,ANGPT2,XIAP,APP,FASLG,ARF6,ARRB2,BMP2,BMP5,BMP7,BMPR1A,BMPR2,ZFP36L2,CAT,RUNX3,CBL,CCNA2,CDKN1C,COL1A1,COL1A2,CREB1,MAPK14,CCN2,CTNNB1,DYNC1LI2,DNM2,DUSP6,E2F1,EDN1,EEF1A1,EEF2,EGFR,EGR1,EPHA2,ENG,EP300,ERBB2,ERN1,FER,FGF1,FGF2,FGF9,FGFR1,FKBP1A,FOXC1,FOXO3,FNTA,FOS,FUT8,GATA6,KAT2A,GLG1,RAPGEF1,HAS2,HFE,HGF,HIVEP1,ONECUT1,HOXA13,HSPA1A,NDST1,RBPJ,ILK,ITGA3,ITGA5,ITGB1,ITG…
3_Member	GO Biological Processes	GO:0070848	response to growth factor	-53.4999	-49.8036	179/720	90,94,142,207,285,331,351,356,382,409,650,653,655,657,659,678,847,864,867,890,1028,1277,1278,1385,1432,1490,1499,1783,1785,1848,1869,1906,1915,1938,1956,1958,1969,2022,2033,2064,2081,2241,2246,2247,2254,2260,2280,2296,2309,2339,2353,2530,2627,2648,2734,2889,3037,3077,3082,3096,3175,3209,3303,3340,3516,3611,3675,3678,3688,3690,3696,3725,4086,4087,4089,4090,4092,4193,4221,4487,4504,4609,4641,4756,4…	ACVR1,ACVRL1,PARP1,AKT1,ANGPT2,XIAP,APP,FASLG,ARF6,ARRB2,BMP2,BMP5,BMP7,BMPR1A,BMPR2,ZFP36L2,CAT,RUNX3,CBL,CCNA2,CDKN1C,COL1A1,COL1A2,CREB1,MAPK14,CCN2,CTNNB1,DYNC1LI2,DNM2,DUSP6,E2F1,EDN1,EEF1A1,EEF2,EGFR,EGR1,EPHA2,ENG,EP300,ERBB2,ERN1,FER,FGF1,FGF2,FGF9,FGFR1,FKBP1A,FOXC1,FOXO3,FNTA,FOS,FUT8,GATA6,KAT2A,GLG1,RAPGEF1,HAS2,HFE,HGF,HIVEP1,ONECUT1,HOXA13,HSPA1A,NDST1,RBPJ,ILK,ITGA3,ITGA5,ITGB1,ITG…
3_Member	GO Biological Processes	GO:0071363	cellular response to growth factor stimulus	-50.2648	-46.8062	170/689	90,94,142,207,285,331,351,382,409,650,653,655,657,659,678,847,867,890,1028,1277,1278,1385,1432,1490,1499,1783,1785,1869,1906,1915,1938,1956,1958,2022,2033,2064,2081,2246,2247,2254,2260,2280,2296,2309,2339,2353,2530,2627,2648,2734,2889,3037,3077,3082,3096,3175,3209,3303,3340,3516,3611,3675,3678,3688,3690,3696,3725,4086,4087,4089,4090,4092,4193,4221,4487,4504,4641,4756,4838,4851,4853,4914,5139,5156…	ACVR1,ACVRL1,PARP1,AKT1,ANGPT2,XIAP,APP,ARF6,ARRB2,BMP2,BMP5,BMP7,BMPR1A,BMPR2,ZFP36L2,CAT,CBL,CCNA2,CDKN1C,COL1A1,COL1A2,CREB1,MAPK14,CCN2,CTNNB1,DYNC1LI2,DNM2,E2F1,EDN1,EEF1A1,EEF2,EGFR,EGR1,ENG,EP300,ERBB2,ERN1,FGF1,FGF2,FGF9,FGFR1,FKBP1A,FOXC1,FOXO3,FNTA,FOS,FUT8,GATA6,KAT2A,GLG1,RAPGEF1,HAS2,HFE,HGF,HIVEP1,ONECUT1,HOXA13,HSPA1A,NDST1,RBPJ,ILK,ITGA3,ITGA5,ITGB1,ITGB3,ITGB8,JUN,SMAD1,SMAD2,SMA…
3_Member	GO Biological Processes	GO:0007178	transmembrane receptor protein serine/threonine kinase signaling pathway	-34.284	-31.6307	100/359	90,94,142,331,409,650,651,653,655,657,659,1028,1278,1385,1432,1785,1958,2022,2033,2280,2339,2353,2530,2734,3077,3096,3175,3209,3303,3516,3611,3624,3675,3688,3696,3725,4086,4087,4089,4090,4092,4221,4487,4756,4838,4851,4853,5371,5465,5468,6386,6469,6497,6498,6774,6868,6998,7040,7042,7046,7048,7049,7157,7321,7323,7431,7474,9197,9372,9392,9518,9839,10140,10273,10454,10637,10755,11167,23089,23144,2341…	ACVR1,ACVRL1,PARP1,XIAP,ARRB2,BMP2,BMP3,BMP5,BMP7,BMPR1A,BMPR2,CDKN1C,COL1A2,CREB1,MAPK14,DNM2,EGR1,ENG,EP300,FKBP1A,FNTA,FOS,FUT8,GLG1,HFE,HIVEP1,ONECUT1,HOXA13,HSPA1A,RBPJ,ILK,INHBA,ITGA3,ITGB1,ITGB8,JUN,SMAD1,SMAD2,SMAD4,SMAD5,SMAD7,MEN1,MSX1,NEO1,NODAL,NOTCH1,NOTCH2,PML,PPARA,PPARG,SDCBP,SHH,SKI,SKIL,STAT3,ADAM17,TDGF1P3,TGFB1,TGFB2,TGFBR1,TGFBR2,TGFBR3,TP53,UBE2D1,UBE2D3,VIM,WNT5A,SLC33A1,ZF…
3_Member	GO Biological Processes	GO:0071559	response to transforming growth factor beta	-30.7988	-28.3401	80/260	90,94,142,409,650,657,678,864,1028,1277,1278,1385,1785,1906,2022,2033,2280,2339,2353,2530,2734,3175,3303,3675,3688,3696,3725,4086,4087,4089,4090,4092,4221,4838,5139,5371,5465,5468,6386,6497,6498,6774,6868,7040,7042,7046,7048,7049,7157,7472,7474,7525,8837,9372,9392,9518,9839,10273,10454,10637,10755,10891,23089,23411,25805,26036,26524,28996,51341,51701,51741,54756,57178,64750,80326,116844,117166,19…	ACVR1,ACVRL1,PARP1,ARRB2,BMP2,BMPR1A,ZFP36L2,RUNX3,CDKN1C,COL1A1,COL1A2,CREB1,DNM2,EDN1,ENG,EP300,FKBP1A,FNTA,FOS,FUT8,GLG1,ONECUT1,HSPA1A,ITGA3,ITGB1,ITGB8,JUN,SMAD1,SMAD2,SMAD4,SMAD5,SMAD7,MEN1,NODAL,PDE3A,PML,PPARA,PPARG,SDCBP,SKI,SKIL,STAT3,ADAM17,TGFB1,TGFB2,TGFBR1,TGFBR2,TGFBR3,TP53,WNT2,WNT5A,YES1,CFLAR,ZFYVE9,TGFBRAP1,GDF15,ZEB2,STUB1,TAB1,LEFTY1,GIPC1,PPARGC1A,PEG10,SIRT1,BAMBI,ZNF451,LA…
3_Member	GO Biological Processes	GO:0071560	cellular response to transforming growth factor beta stimulus	-30.7807	-28.3275	79/254	90,94,142,409,650,657,678,1028,1277,1278,1385,1785,1906,2022,2033,2280,2339,2353,2530,2734,3175,3303,3675,3688,3696,3725,4086,4087,4089,4090,4092,4221,4838,5139,5371,5465,5468,6386,6497,6498,6774,6868,7040,7042,7046,7048,7049,7157,7472,7474,7525,8837,9372,9392,9518,9839,10273,10454,10637,10755,10891,23089,23411,25805,26036,26524,28996,51341,51701,51741,54756,57178,64750,80326,116844,117166,199699…	ACVR1,ACVRL1,PARP1,ARRB2,BMP2,BMPR1A,ZFP36L2,CDKN1C,COL1A1,COL1A2,CREB1,DNM2,EDN1,ENG,EP300,FKBP1A,FNTA,FOS,FUT8,GLG1,ONECUT1,HSPA1A,ITGA3,ITGB1,ITGB8,JUN,SMAD1,SMAD2,SMAD4,SMAD5,SMAD7,MEN1,NODAL,PDE3A,PML,PPARA,PPARG,SDCBP,SKI,SKIL,STAT3,ADAM17,TGFB1,TGFB2,TGFBR1,TGFBR2,TGFBR3,TP53,WNT2,WNT5A,YES1,CFLAR,ZFYVE9,TGFBRAP1,GDF15,ZEB2,STUB1,TAB1,LEFTY1,GIPC1,PPARGC1A,PEG10,SIRT1,BAMBI,ZNF451,LATS2,HI…
3_Member	GO Biological Processes	GO:0007179	transforming growth factor beta receptor signaling pathway	-28.8999	-26.5381	68/202	90,94,142,409,650,657,1028,1278,1385,1785,2022,2033,2280,2339,2353,2530,2734,3175,3303,3675,3688,3696,3725,4086,4087,4089,4090,4092,4221,4838,5371,5465,5468,6386,6497,6498,6774,6868,7040,7042,7046,7048,7049,7157,9372,9392,9518,9839,10273,10454,10637,10755,23089,23411,25805,26036,26524,28996,51341,51701,54756,57178,64750,116844,117166,199699,255743,283149	ACVR1,ACVRL1,PARP1,ARRB2,BMP2,BMPR1A,CDKN1C,COL1A2,CREB1,DNM2,ENG,EP300,FKBP1A,FNTA,FOS,FUT8,GLG1,ONECUT1,HSPA1A,ITGA3,ITGB1,ITGB8,JUN,SMAD1,SMAD2,SMAD4,SMAD5,SMAD7,MEN1,NODAL,PML,PPARA,PPARG,SDCBP,SKI,SKIL,STAT3,ADAM17,TGFB1,TGFB2,TGFBR1,TGFBR2,TGFBR3,TP53,ZFYVE9,TGFBRAP1,GDF15,ZEB2,STUB1,TAB1,LEFTY1,GIPC1,PEG10,SIRT1,BAMBI,ZNF451,LATS2,HIPK2,ZBTB7A,NLK,IL17RD,ZMIZ1,SMURF2,LRG1,WFIKKN1,DAND5,NPN…
3_Member	GO Biological Processes	GO:0090092	regulation of transmembrane receptor protein serine/threonine kinase signaling pathway	-24.9817	-22.8075	72/257	90,94,142,331,650,651,653,655,657,659,1028,1785,2022,2033,2280,2734,3077,3175,3209,3303,3516,3611,3624,3675,4087,4089,4092,4221,4487,4756,4838,4851,4853,5465,5468,6386,6469,6497,6498,6868,7040,7042,7046,7049,7157,7321,7323,7474,9518,9839,10140,10273,10637,10755,11167,23089,23144,23411,25805,26036,26524,28996,51341,53918,54756,64750,116844,117166,199699,255743,283149,353500	ACVR1,ACVRL1,PARP1,XIAP,BMP2,BMP3,BMP5,BMP7,BMPR1A,BMPR2,CDKN1C,DNM2,ENG,EP300,FKBP1A,GLG1,HFE,ONECUT1,HOXA13,HSPA1A,RBPJ,ILK,INHBA,ITGA3,SMAD2,SMAD4,SMAD7,MEN1,MSX1,NEO1,NODAL,NOTCH1,NOTCH2,PPARA,PPARG,SDCBP,SHH,SKI,SKIL,ADAM17,TGFB1,TGFB2,TGFBR1,TGFBR3,TP53,UBE2D1,UBE2D3,WNT5A,GDF15,ZEB2,TOB1,STUB1,LEFTY1,GIPC1,FSTL1,PEG10,ZC3H3,SIRT1,BAMBI,ZNF451,LATS2,HIPK2,ZBTB7A,PELO,IL17RD,SMURF2,LRG1,WFIK…
3_Member	GO Biological Processes	GO:0090287	regulation of cellular response to growth factor stimulus	-19.0222	-17.1711	70/304	94,331,650,659,1028,1499,1785,2022,2033,2246,2247,2260,2280,2734,3175,3209,3303,3516,3611,3675,3678,3690,4087,4089,4092,4221,4487,4504,4641,4756,4851,4853,5465,5468,5770,6091,6386,6497,6498,6868,7040,7049,7157,7321,7323,7474,8837,9839,10140,10273,10755,11167,23089,23411,25805,25865,26036,26524,28996,51341,53918,54756,64750,116844,117166,147372,199699,255743,283149,406985	ACVRL1,XIAP,BMP2,BMPR2,CDKN1C,CTNNB1,DNM2,ENG,EP300,FGF1,FGF2,FGFR1,FKBP1A,GLG1,ONECUT1,HOXA13,HSPA1A,RBPJ,ILK,ITGA3,ITGA5,ITGB3,SMAD2,SMAD4,SMAD7,MEN1,MSX1,MT3,MYO1C,NEO1,NOTCH1,NOTCH2,PPARA,PPARG,PTPN1,ROBO1,SDCBP,SKI,SKIL,ADAM17,TGFB1,TGFBR3,TP53,UBE2D1,UBE2D3,WNT5A,CFLAR,ZEB2,TOB1,STUB1,GIPC1,FSTL1,PEG10,SIRT1,BAMBI,PRKD2,ZNF451,LATS2,HIPK2,ZBTB7A,PELO,IL17RD,SMURF2,LRG1,WFIKKN1,CCBE1,DAND5,N…
3_Member	GO Biological Processes	GO:1903844	regulation of cellular response to transforming growth factor beta stimulus	-16.2654	-14.5831	41/132	650,1028,1785,2022,2033,2280,2734,3175,3303,3675,4087,4089,4092,4221,5465,5468,6386,6497,6498,6868,7040,7049,7157,8837,9839,10273,10755,23089,23411,25805,26036,26524,28996,51341,54756,64750,116844,117166,199699,255743,283149	BMP2,CDKN1C,DNM2,ENG,EP300,FKBP1A,GLG1,ONECUT1,HSPA1A,ITGA3,SMAD2,SMAD4,SMAD7,MEN1,PPARA,PPARG,SDCBP,SKI,SKIL,ADAM17,TGFB1,TGFBR3,TP53,CFLAR,ZEB2,STUB1,GIPC1,PEG10,SIRT1,BAMBI,ZNF451,LATS2,HIPK2,ZBTB7A,IL17RD,SMURF2,LRG1,WFIKKN1,DAND5,NPNT,BCL9L
3_Member	GO Biological Processes	GO:0017015	regulation of transforming growth factor beta receptor signaling pathway	-15.8572	-14.2065	40/129	650,1028,1785,2022,2033,2280,2734,3175,3303,3675,4087,4089,4092,4221,5465,5468,6386,6497,6498,6868,7040,7049,7157,9839,10273,10755,23089,23411,25805,26036,26524,28996,51341,54756,64750,116844,117166,199699,255743,283149	BMP2,CDKN1C,DNM2,ENG,EP300,FKBP1A,GLG1,ONECUT1,HSPA1A,ITGA3,SMAD2,SMAD4,SMAD7,MEN1,PPARA,PPARG,SDCBP,SKI,SKIL,ADAM17,TGFB1,TGFBR3,TP53,ZEB2,STUB1,GIPC1,PEG10,SIRT1,BAMBI,ZNF451,LATS2,HIPK2,ZBTB7A,IL17RD,SMURF2,LRG1,WFIKKN1,DAND5,NPNT,BCL9L
3_Member	GO Biological Processes	GO:0030512	negative regulation of transforming growth factor beta receptor signaling pathway	-10.1259	-8.82107	25/81	650,1785,2280,2734,3175,3303,4092,5465,5468,6497,6498,6868,7049,7157,10273,23089,23411,25805,26036,51341,54756,64750,117166,199699,283149	BMP2,DNM2,FKBP1A,GLG1,ONECUT1,HSPA1A,SMAD7,PPARA,PPARG,SKI,SKIL,ADAM17,TGFBR3,TP53,STUB1,PEG10,SIRT1,BAMBI,ZNF451,ZBTB7A,IL17RD,SMURF2,WFIKKN1,DAND5,BCL9L
3_Member	GO Biological Processes	GO:0090101	negative regulation of transmembrane receptor protein serine/threonine kinase signaling pathway	-9.87046	-8.58106	32/130	90,650,1785,2280,2734,3175,3303,4092,4851,5465,5468,6497,6498,6868,7049,7157,7321,7323,7474,10140,10273,23089,23411,25805,26036,28996,51341,54756,64750,117166,199699,283149	ACVR1,BMP2,DNM2,FKBP1A,GLG1,ONECUT1,HSPA1A,SMAD7,NOTCH1,PPARA,PPARG,SKI,SKIL,ADAM17,TGFBR3,TP53,UBE2D1,UBE2D3,WNT5A,TOB1,STUB1,PEG10,SIRT1,BAMBI,ZNF451,HIPK2,ZBTB7A,IL17RD,SMURF2,WFIKKN1,DAND5,BCL9L
4_Summary	Reactome Gene Sets	R-HSA-8953897	Cellular responses to stimuli	-53.4984	-49.8036	186/771	367,472,528,571,648,811,818,829,830,847,890,898,1019,1021,1026,1027,1054,1200,1345,1385,1432,1457,1783,1869,1870,1915,1968,2033,2081,2113,2353,2475,2876,2932,2936,3005,3017,3021,3159,3303,3304,3305,3312,3320,3456,3484,3552,3569,3725,3921,4001,4189,4193,4194,4209,4217,4502,4504,5241,5465,5580,5594,5606,5611,5683,5684,5692,5693,5700,5702,5709,5710,5719,5720,5721,5903,5925,5928,6124,6130,6133,6137,6…	AR,ATM,ATP6V1C1,BACH1,BMI1,CALR,CAMK2G,CAPZA1,CAPZA2,CAT,CCNA2,CCNE1,CDK4,CDK6,CDKN1A,CDKN1B,CEBPG,TPP1,COX6C,CREB1,MAPK14,CSNK2A1,DYNC1LI2,E2F1,E2F2,EEF1A1,EIF2S3,EP300,ERN1,ETS1,FOS,MTOR,GPX1,GSK3B,GSR,H1-0,H2BC5,H3-3B,HMGA1,HSPA1A,HSPA1B,HSPA1L,HSPA8,HSP90AA1,IFNB1,IGFBP1,IL1A,IL6,JUN,RPSA,LMNB1,DNAJB9,MDM2,MDM4,MEF2D,MAP3K5,MT2A,MT3,PGR,PPARA,PRKCD,MAPK1,MAP2K3,DNAJC3,PSMA2,PSMA3,PSMB4,PSMB5,…
4_Member	Reactome Gene Sets	R-HSA-8953897	Cellular responses to stimuli	-53.4984	-49.8036	186/771	367,472,528,571,648,811,818,829,830,847,890,898,1019,1021,1026,1027,1054,1200,1345,1385,1432,1457,1783,1869,1870,1915,1968,2033,2081,2113,2353,2475,2876,2932,2936,3005,3017,3021,3159,3303,3304,3305,3312,3320,3456,3484,3552,3569,3725,3921,4001,4189,4193,4194,4209,4217,4502,4504,5241,5465,5580,5594,5606,5611,5683,5684,5692,5693,5700,5702,5709,5710,5719,5720,5721,5903,5925,5928,6124,6130,6133,6137,6…	AR,ATM,ATP6V1C1,BACH1,BMI1,CALR,CAMK2G,CAPZA1,CAPZA2,CAT,CCNA2,CCNE1,CDK4,CDK6,CDKN1A,CDKN1B,CEBPG,TPP1,COX6C,CREB1,MAPK14,CSNK2A1,DYNC1LI2,E2F1,E2F2,EEF1A1,EIF2S3,EP300,ERN1,ETS1,FOS,MTOR,GPX1,GSK3B,GSR,H1-0,H2BC5,H3-3B,HMGA1,HSPA1A,HSPA1B,HSPA1L,HSPA8,HSP90AA1,IFNB1,IGFBP1,IL1A,IL6,JUN,RPSA,LMNB1,DNAJB9,MDM2,MDM4,MEF2D,MAP3K5,MT2A,MT3,PGR,PPARA,PRKCD,MAPK1,MAP2K3,DNAJC3,PSMA2,PSMA3,PSMB4,PSMB5,…
4_Member	Reactome Gene Sets	R-HSA-2262752	Cellular responses to stress	-52.7596	-49.176	183/757	367,472,528,571,648,811,818,829,830,847,890,898,1019,1021,1026,1027,1054,1200,1345,1385,1432,1457,1783,1869,1870,1915,1968,2033,2081,2113,2353,2475,2876,2932,2936,3005,3017,3021,3159,3303,3304,3305,3312,3320,3456,3484,3552,3569,3725,3921,4001,4189,4193,4194,4209,4217,5241,5465,5580,5594,5606,5611,5683,5684,5692,5693,5700,5702,5709,5710,5719,5720,5721,5903,5925,5928,6124,6130,6133,6137,6141,6142,6…	AR,ATM,ATP6V1C1,BACH1,BMI1,CALR,CAMK2G,CAPZA1,CAPZA2,CAT,CCNA2,CCNE1,CDK4,CDK6,CDKN1A,CDKN1B,CEBPG,TPP1,COX6C,CREB1,MAPK14,CSNK2A1,DYNC1LI2,E2F1,E2F2,EEF1A1,EIF2S3,EP300,ERN1,ETS1,FOS,MTOR,GPX1,GSK3B,GSR,H1-0,H2BC5,H3-3B,HMGA1,HSPA1A,HSPA1B,HSPA1L,HSPA8,HSP90AA1,IFNB1,IGFBP1,IL1A,IL6,JUN,RPSA,LMNB1,DNAJB9,MDM2,MDM4,MEF2D,MAP3K5,PGR,PPARA,PRKCD,MAPK1,MAP2K3,DNAJC3,PSMA2,PSMA3,PSMB4,PSMB5,PSMC1,PSM…
5_Summary	GO Biological Processes	GO:0043549	regulation of kinase activity	-53.4664	-49.8036	185/764	60,103,104,116,207,351,387,650,655,657,659,728,805,808,867,890,894,898,900,904,920,942,993,1020,1026,1027,1028,1050,1191,1435,1616,1654,1855,1906,1915,1942,1956,1958,1969,2050,2064,2065,2069,2081,2147,2246,2247,2260,2268,2358,2475,2547,2629,2776,2810,3082,3146,3170,3265,3320,3458,3479,3480,3570,3606,3611,3619,3690,3845,4040,4067,4217,4221,4233,4294,4298,4486,4504,4771,4869,4914,5156,5208,5245,529…	ACTB,ADAR,ADARB1,ADCYAP1,AKT1,APP,RHOA,BMP2,BMP7,BMPR1A,BMPR2,C5AR1,CALM2,CALM3,CBL,CCNA2,CCND2,CCNE1,CCNG1,CCNT1,CD4,CD86,CDC25A,CDK5,CDKN1A,CDKN1B,CDKN1C,CEBPA,CLU,CSF1,DAXX,DDX3X,DVL1,EDN1,EEF1A1,EFNA1,EGFR,EGR1,EPHA2,EPHB4,ERBB2,ERBB3,EREG,ERN1,F2,FGF1,FGF2,FGFR1,FGR,FPR2,MTOR,XRCC6,GBA,GNAQ,SFN,HGF,HMGB1,FOXA2,HRAS,HSP90AA1,IFNG,IGF1,IGF1R,IL6R,IL18,ILK,INCENP,ITGB3,KRAS,LRP6,LYN,MAP3K5,MEN1…
5_Member	GO Biological Processes	GO:0043549	regulation of kinase activity	-53.4664	-49.8036	185/764	60,103,104,116,207,351,387,650,655,657,659,728,805,808,867,890,894,898,900,904,920,942,993,1020,1026,1027,1028,1050,1191,1435,1616,1654,1855,1906,1915,1942,1956,1958,1969,2050,2064,2065,2069,2081,2147,2246,2247,2260,2268,2358,2475,2547,2629,2776,2810,3082,3146,3170,3265,3320,3458,3479,3480,3570,3606,3611,3619,3690,3845,4040,4067,4217,4221,4233,4294,4298,4486,4504,4771,4869,4914,5156,5208,5245,529…	ACTB,ADAR,ADARB1,ADCYAP1,AKT1,APP,RHOA,BMP2,BMP7,BMPR1A,BMPR2,C5AR1,CALM2,CALM3,CBL,CCNA2,CCND2,CCNE1,CCNG1,CCNT1,CD4,CD86,CDC25A,CDK5,CDKN1A,CDKN1B,CDKN1C,CEBPA,CLU,CSF1,DAXX,DDX3X,DVL1,EDN1,EEF1A1,EFNA1,EGFR,EGR1,EPHA2,EPHB4,ERBB2,ERBB3,EREG,ERN1,F2,FGF1,FGF2,FGFR1,FGR,FPR2,MTOR,XRCC6,GBA,GNAQ,SFN,HGF,HMGB1,FOXA2,HRAS,HSP90AA1,IFNG,IGF1,IGF1R,IL6R,IL18,ILK,INCENP,ITGB3,KRAS,LRP6,LYN,MAP3K5,MEN1…
5_Member	GO Biological Processes	GO:0045859	regulation of protein kinase activity	-50.3649	-46.8483	164/645	60,103,104,116,207,351,387,650,655,657,659,728,805,808,867,890,894,898,900,904,920,942,993,1020,1026,1027,1028,1050,1191,1435,1616,1654,1855,1906,1942,1956,1958,2064,2065,2069,2081,2246,2247,2260,2268,2475,2547,2629,2776,2810,3082,3146,3265,3320,3458,3479,3570,3606,3611,3619,3690,3845,4040,4067,4217,4221,4294,4298,4486,4504,4771,4869,5245,5294,5310,5339,5468,5478,5573,5580,5590,5604,5606,5618,562…	ACTB,ADAR,ADARB1,ADCYAP1,AKT1,APP,RHOA,BMP2,BMP7,BMPR1A,BMPR2,C5AR1,CALM2,CALM3,CBL,CCNA2,CCND2,CCNE1,CCNG1,CCNT1,CD4,CD86,CDC25A,CDK5,CDKN1A,CDKN1B,CDKN1C,CEBPA,CLU,CSF1,DAXX,DDX3X,DVL1,EDN1,EFNA1,EGFR,EGR1,ERBB2,ERBB3,EREG,ERN1,FGF1,FGF2,FGFR1,FGR,MTOR,XRCC6,GBA,GNAQ,SFN,HGF,HMGB1,HRAS,HSP90AA1,IFNG,IGF1,IL6R,IL18,ILK,INCENP,ITGB3,KRAS,LRP6,LYN,MAP3K5,MEN1,MAP3K10,MLLT1,MST1R,MT3,NF2,NPM1,PHB,P…
5_Member	GO Biological Processes	GO:0001934	positive regulation of protein phosphorylation	-48.3435	-44.9361	173/732	90,94,116,207,351,387,409,596,650,651,653,655,657,659,673,718,805,808,894,904,920,942,1020,1025,1026,1027,1191,1435,1490,1616,1654,1855,1906,1942,1956,1958,2022,2064,2065,2069,2081,2147,2246,2247,2254,2260,2358,2475,2547,3077,3082,3146,3265,3320,3456,3458,3479,3569,3570,3572,3606,3611,3619,3624,3678,3690,3845,3976,4067,4089,4217,4294,4318,4486,4504,4838,4869,4914,5007,5245,5294,5310,5336,5468,547…	ACVR1,ACVRL1,ADCYAP1,AKT1,APP,RHOA,ARRB2,BCL2,BMP2,BMP3,BMP5,BMP7,BMPR1A,BMPR2,BRAF,C3,CALM2,CALM3,CCND2,CCNT1,CD4,CD86,CDK5,CDK9,CDKN1A,CDKN1B,CLU,CSF1,CCN2,DAXX,DDX3X,DVL1,EDN1,EFNA1,EGFR,EGR1,ENG,ERBB2,ERBB3,EREG,ERN1,F2,FGF1,FGF2,FGF9,FGFR1,FPR2,MTOR,XRCC6,HFE,HGF,HMGB1,HRAS,HSP90AA1,IFNB1,IFNG,IGF1,IL6,IL6R,IL6ST,IL18,ILK,INCENP,INHBA,ITGA5,ITGB3,KRAS,LIF,LYN,SMAD4,MAP3K5,MAP3K10,MMP9,MST1R,…
5_Member	GO Biological Processes	GO:0033674	positive regulation of kinase activity	-38.064	-35.2338	123/480	116,207,387,650,657,659,805,808,894,904,920,942,1020,1026,1027,1191,1435,1616,1654,1906,1942,1956,1958,1969,2050,2064,2065,2069,2081,2147,2246,2247,2260,2268,2358,2475,2547,3146,3265,3320,3458,3479,3480,3570,3606,3611,3619,3690,3845,4067,4217,4233,4294,4486,4504,4869,4914,5156,5208,5245,5294,5310,5478,5580,5590,5604,5606,5618,5621,5629,5770,5871,5903,6091,6385,6789,6850,6868,7039,7040,7042,7048,7…	ADCYAP1,AKT1,RHOA,BMP2,BMPR1A,BMPR2,CALM2,CALM3,CCND2,CCNT1,CD4,CD86,CDK5,CDKN1A,CDKN1B,CLU,CSF1,DAXX,DDX3X,EDN1,EFNA1,EGFR,EGR1,EPHA2,EPHB4,ERBB2,ERBB3,EREG,ERN1,F2,FGF1,FGF2,FGFR1,FGR,FPR2,MTOR,XRCC6,HMGB1,HRAS,HSP90AA1,IFNG,IGF1,IGF1R,IL6R,IL18,ILK,INCENP,ITGB3,KRAS,LYN,MAP3K5,MET,MAP3K10,MST1R,MT3,NPM1,NTRK1,PDGFRA,PFKFB2,PHB,PIK3CG,PKD1,PPIA,PRKCD,PRKCZ,MAP2K1,MAP2K3,PRLR,PRNP,PROX1,PTPN1,MA…
5_Member	GO Biological Processes	GO:0051347	positive regulation of transferase activity	-37.6973	-34.8919	134/563	116,207,387,648,650,657,659,805,808,894,904,920,942,1020,1026,1027,1191,1435,1499,1616,1654,1906,1942,1956,1958,1969,2050,2064,2065,2069,2081,2147,2246,2247,2260,2268,2358,2475,2547,3146,3265,3320,3458,3479,3480,3570,3606,3611,3619,3690,3845,4067,4217,4233,4294,4486,4504,4609,4869,4914,5111,5156,5208,5245,5294,5310,5478,5580,5590,5594,5604,5606,5618,5621,5629,5728,5770,5871,5903,6091,6187,6385,67…	ADCYAP1,AKT1,RHOA,BMI1,BMP2,BMPR1A,BMPR2,CALM2,CALM3,CCND2,CCNT1,CD4,CD86,CDK5,CDKN1A,CDKN1B,CLU,CSF1,CTNNB1,DAXX,DDX3X,EDN1,EFNA1,EGFR,EGR1,EPHA2,EPHB4,ERBB2,ERBB3,EREG,ERN1,F2,FGF1,FGF2,FGFR1,FGR,FPR2,MTOR,XRCC6,HMGB1,HRAS,HSP90AA1,IFNG,IGF1,IGF1R,IL6R,IL18,ILK,INCENP,ITGB3,KRAS,LYN,MAP3K5,MET,MAP3K10,MST1R,MT3,MYC,NPM1,NTRK1,PCNA,PDGFRA,PFKFB2,PHB,PIK3CG,PKD1,PPIA,PRKCD,PRKCZ,MAPK1,MAP2K1,MAP2…
5_Member	GO Biological Processes	GO:0045860	positive regulation of protein kinase activity	-35.0387	-32.3491	107/399	116,207,387,650,657,659,805,808,894,904,920,942,1020,1026,1027,1191,1435,1616,1654,1906,1942,1956,1958,2064,2065,2069,2081,2246,2247,2260,2475,2547,3146,3265,3320,3458,3479,3570,3606,3611,3619,3690,3845,4217,4294,4486,4504,4869,5245,5294,5310,5478,5580,5590,5604,5606,5618,5621,5629,5770,5871,6091,6385,6789,6850,6868,7039,7040,7042,7048,7098,7099,7124,7186,7422,7436,7474,7786,8115,8567,8600,8795,8…	ADCYAP1,AKT1,RHOA,BMP2,BMPR1A,BMPR2,CALM2,CALM3,CCND2,CCNT1,CD4,CD86,CDK5,CDKN1A,CDKN1B,CLU,CSF1,DAXX,DDX3X,EDN1,EFNA1,EGFR,EGR1,ERBB2,ERBB3,EREG,ERN1,FGF1,FGF2,FGFR1,MTOR,XRCC6,HMGB1,HRAS,HSP90AA1,IFNG,IGF1,IL6R,IL18,ILK,INCENP,ITGB3,KRAS,MAP3K5,MAP3K10,MST1R,MT3,NPM1,PHB,PIK3CG,PKD1,PPIA,PRKCD,PRKCZ,MAP2K1,MAP2K3,PRLR,PRNP,PROX1,PTPN1,MAP4K2,ROBO1,SDC4,STK4,SYK,ADAM17,TGFA,TGFB1,TGFB2,TGFBR2,TL…
5_Member	GO Biological Processes	GO:0071900	regulation of protein serine/threonine kinase activity	-27.1723	-24.911	91/366	60,207,387,650,655,657,659,805,808,890,894,898,900,904,993,1026,1027,1028,1050,1654,1906,1956,2064,2081,2246,2247,2260,2629,2810,3265,3458,3611,3619,3845,4040,4067,4217,4221,4294,4486,5294,5310,5468,5573,5580,5604,5629,5728,5770,5777,5871,5925,6091,6789,6850,6868,7026,7039,7040,7099,7124,7128,7186,7345,7422,7474,7786,8115,8600,8850,8851,9370,9555,9623,10019,10114,10221,10333,10454,11213,11221,112…	ACTB,AKT1,RHOA,BMP2,BMP7,BMPR1A,BMPR2,CALM2,CALM3,CCNA2,CCND2,CCNE1,CCNG1,CCNT1,CDC25A,CDKN1A,CDKN1B,CDKN1C,CEBPA,DDX3X,EDN1,EGFR,ERBB2,ERN1,FGF1,FGF2,FGFR1,GBA,SFN,HRAS,IFNG,ILK,INCENP,KRAS,LRP6,LYN,MAP3K5,MEN1,MAP3K10,MST1R,PIK3CG,PKD1,PPARG,PRKAR1A,PRKCD,MAP2K1,PROX1,PTEN,PTPN1,PTPN6,MAP4K2,RB1,ROBO1,STK4,SYK,ADAM17,NR2F2,TGFA,TGFB1,TLR4,TNF,TNFAIP3,TRAF2,UCHL1,VEGFA,WNT5A,MAP3K12,TCL1A,TNFSF1…
5_Member	GO Biological Processes	GO:0071902	positive regulation of protein serine/threonine kinase activity	-18.2843	-16.4825	55/205	207,387,650,657,659,805,808,894,904,1027,1654,1906,1956,2064,2081,2246,2247,2260,3265,3458,3611,3619,3845,4217,4294,4486,5294,5310,5604,5629,5770,5871,6091,6789,6850,6868,7039,7040,7099,7124,7186,7422,7474,7786,8115,8600,8851,9370,9623,10333,10454,11235,23411,51719,54106	AKT1,RHOA,BMP2,BMPR1A,BMPR2,CALM2,CALM3,CCND2,CCNT1,CDKN1B,DDX3X,EDN1,EGFR,ERBB2,ERN1,FGF1,FGF2,FGFR1,HRAS,IFNG,ILK,INCENP,KRAS,MAP3K5,MAP3K10,MST1R,PIK3CG,PKD1,MAP2K1,PROX1,PTPN1,MAP4K2,ROBO1,STK4,SYK,ADAM17,TGFA,TGFB1,TLR4,TNF,TRAF2,VEGFA,WNT5A,MAP3K12,TCL1A,TNFSF11,CDK5R1,ADIPOQ,TCL1B,TLR6,TAB1,PDCD10,SIRT1,CAB39,TLR9
5_Member	GO Biological Processes	GO:0043405	regulation of MAP kinase activity	-17.2658	-15.5263	50/181	650,655,1906,1956,2064,2081,2246,2247,2260,2629,3265,3611,3845,4067,4217,4294,4486,5294,5468,5580,5770,5777,5871,6091,6850,7039,7040,7099,7124,7186,7345,7422,7474,7786,8600,9370,10019,10114,10221,10333,10454,11213,11221,11235,23636,26191,27250,28951,54106,54900	BMP2,BMP7,EDN1,EGFR,ERBB2,ERN1,FGF1,FGF2,FGFR1,GBA,HRAS,ILK,KRAS,LYN,MAP3K5,MAP3K10,MST1R,PIK3CG,PPARG,PRKCD,PTPN1,PTPN6,MAP4K2,ROBO1,SYK,TGFA,TGFB1,TLR4,TNF,TRAF2,UCHL1,VEGFA,WNT5A,MAP3K12,TNFSF11,ADIPOQ,SH2B3,HIPK3,TRIB1,TLR6,TAB1,IRAK3,DUSP10,PDCD10,NUP62,PTPN22,PDCD4,TRIB2,TLR9,LAX1
5_Member	GO Biological Processes	GO:0043406	positive regulation of MAP kinase activity	-10.781	-9.43297	31/114	1906,1956,2064,2081,2246,2247,2260,3265,3611,3845,4217,4294,4486,5294,5770,5871,6091,6850,7039,7040,7099,7124,7186,7422,7474,7786,8600,10333,10454,11235,54106	EDN1,EGFR,ERBB2,ERN1,FGF1,FGF2,FGFR1,HRAS,ILK,KRAS,MAP3K5,MAP3K10,MST1R,PIK3CG,PTPN1,MAP4K2,ROBO1,SYK,TGFA,TGFB1,TLR4,TNF,TRAF2,VEGFA,WNT5A,MAP3K12,TNFSF11,TLR6,TAB1,PDCD10,TLR9
6_Summary	GO Biological Processes	GO:0009611	response to wounding	-47.0305	-43.6688	146/552	60,71,94,133,308,350,387,581,596,667,678,954,966,977,1020,1026,1192,1277,1289,1432,1490,1906,1956,2064,2065,2069,2113,2147,2149,2150,2161,2246,2247,2281,2316,2475,2677,2696,2697,2737,2768,2776,2814,2876,3146,3170,3265,3399,3479,3552,3569,3572,3611,3624,3673,3678,3688,3690,3956,3998,4067,4087,4149,4217,4627,4638,4846,4853,4914,5156,5196,5294,5327,5336,5339,5359,5465,5478,5530,5580,5604,5728,5777,5…	ACTB,ACTG1,ACVRL1,ADM,ANXA5,APOH,RHOA,BAX,BCL2,DST,ZFP36L2,ENTPD2,CD59,CD151,CDK5,CDKN1A,CLIC1,COL1A1,COL5A1,MAPK14,CCN2,EDN1,EGFR,ERBB2,ERBB3,EREG,ETS1,F2,F2R,F2RL1,F12,FGF1,FGF2,FKBP1B,FLNA,MTOR,GGCX,GIPR,GJA1,GLI3,GNA12,GNAQ,GP5,GPX1,HMGB1,FOXA2,HRAS,ID3,IGF1,IL1A,IL6,IL6ST,ILK,INHBA,ITGA2,ITGA5,ITGB1,ITGB3,LGALS1,LMAN1,LYN,SMAD2,MAX,MAP3K5,MYH9,MYLK,NOS3,NOTCH2,NTRK1,PDGFRA,PF4,PIK3CG,PLAT,PL…
6_Member	GO Biological Processes	GO:0009611	response to wounding	-47.0305	-43.6688	146/552	60,71,94,133,308,350,387,581,596,667,678,954,966,977,1020,1026,1192,1277,1289,1432,1490,1906,1956,2064,2065,2069,2113,2147,2149,2150,2161,2246,2247,2281,2316,2475,2677,2696,2697,2737,2768,2776,2814,2876,3146,3170,3265,3399,3479,3552,3569,3572,3611,3624,3673,3678,3688,3690,3956,3998,4067,4087,4149,4217,4627,4638,4846,4853,4914,5156,5196,5294,5327,5336,5339,5359,5465,5478,5530,5580,5604,5728,5777,5…	ACTB,ACTG1,ACVRL1,ADM,ANXA5,APOH,RHOA,BAX,BCL2,DST,ZFP36L2,ENTPD2,CD59,CD151,CDK5,CDKN1A,CLIC1,COL1A1,COL5A1,MAPK14,CCN2,EDN1,EGFR,ERBB2,ERBB3,EREG,ETS1,F2,F2R,F2RL1,F12,FGF1,FGF2,FKBP1B,FLNA,MTOR,GGCX,GIPR,GJA1,GLI3,GNA12,GNAQ,GP5,GPX1,HMGB1,FOXA2,HRAS,ID3,IGF1,IL1A,IL6,IL6ST,ILK,INHBA,ITGA2,ITGA5,ITGB1,ITGB3,LGALS1,LMAN1,LYN,SMAD2,MAX,MAP3K5,MYH9,MYLK,NOS3,NOTCH2,NTRK1,PDGFRA,PF4,PIK3CG,PLAT,PL…
6_Member	GO Biological Processes	GO:0042060	wound healing	-41.1295	-38.148	119/424	60,71,94,308,350,387,667,954,966,977,1026,1192,1277,1289,1432,1906,1956,2064,2065,2069,2113,2147,2149,2150,2161,2246,2247,2316,2475,2677,2697,2737,2768,2776,2814,2876,3146,3170,3265,3479,3552,3569,3572,3611,3673,3678,3688,3690,3998,4067,4087,4217,4627,4638,4846,4853,5156,5196,5294,5327,5336,5339,5359,5465,5478,5530,5580,5728,5777,5912,6239,6385,6469,6521,6678,6812,6814,6850,6868,7035,7039,7040,70…	ACTB,ACTG1,ACVRL1,ANXA5,APOH,RHOA,DST,ENTPD2,CD59,CD151,CDKN1A,CLIC1,COL1A1,COL5A1,MAPK14,EDN1,EGFR,ERBB2,ERBB3,EREG,ETS1,F2,F2R,F2RL1,F12,FGF1,FGF2,FLNA,MTOR,GGCX,GJA1,GLI3,GNA12,GNAQ,GP5,GPX1,HMGB1,FOXA2,HRAS,IGF1,IL1A,IL6,IL6ST,ILK,ITGA2,ITGA5,ITGB1,ITGB3,LMAN1,LYN,SMAD2,MAP3K5,MYH9,MYLK,NOS3,NOTCH2,PDGFRA,PF4,PIK3CG,PLAT,PLCG2,PLEC,PLSCR1,PPARA,PPIA,PPP3CA,PRKCD,PTEN,PTPN6,RAP2B,RREB1,SDC4,SH…
6_Member	GO Biological Processes	GO:0050878	regulation of body fluid levels	-25.0567	-22.8797	90/382	60,71,133,308,350,360,954,966,1192,1385,1432,1723,1906,1956,2147,2149,2150,2161,2316,2629,2677,2697,2768,2776,2810,2814,2821,3037,3099,3170,3291,3569,3572,3611,3673,3690,3998,4067,4233,4627,4846,5156,5196,5294,5327,5336,5339,5359,5478,5580,5618,5777,5912,6469,6521,6777,6812,6814,6850,6863,7035,7094,7099,7294,7301,7357,7376,7421,7422,7494,8527,8546,9474,9612,10019,10451,10758,10855,11093,11215,231…	ACTB,ACTG1,ADM,ANXA5,APOH,AQP3,ENTPD2,CD59,CLIC1,CREB1,MAPK14,DHODH,EDN1,EGFR,F2,F2R,F2RL1,F12,FLNA,GBA,GGCX,GJA1,GNA12,GNAQ,SFN,GP5,GPI,HAS2,HK2,FOXA2,HSD11B2,IL6,IL6ST,ILK,ITGA2,ITGB3,LMAN1,LYN,MET,MYH9,NOS3,PDGFRA,PF4,PIK3CG,PLAT,PLCG2,PLEC,PLSCR1,PPIA,PRKCD,PRLR,PTPN6,RAP2B,SHH,SLC4A1,STAT5B,STXBP1,STXBP3,SYK,TAC1,TFPI,TLN1,TLR4,TXK,TYRO3,UGCG,NR1H2,VDR,VEGFA,XBP1,DGKD,AP3B1,ATG5,NCOR2,SH2B3,…
6_Member	GO Biological Processes	GO:0007599	hemostasis	-22.149	-20.1317	63/223	60,71,308,350,954,966,1192,1432,1906,2147,2149,2150,2161,2316,2677,2768,2776,2814,2821,3170,3569,3572,3611,3673,3690,3998,4067,4627,4846,5156,5196,5294,5327,5336,5359,5478,5580,5777,5912,6469,6521,6812,6814,6850,7035,7094,7099,7294,7301,8527,8546,10019,10451,10855,11093,23173,50848,55330,80274,89780,221037,375033,388552	ACTB,ACTG1,ANXA5,APOH,ENTPD2,CD59,CLIC1,MAPK14,EDN1,F2,F2R,F2RL1,F12,FLNA,GGCX,GNA12,GNAQ,GP5,GPI,FOXA2,IL6,IL6ST,ILK,ITGA2,ITGB3,LMAN1,LYN,MYH9,NOS3,PDGFRA,PF4,PIK3CG,PLAT,PLCG2,PLSCR1,PPIA,PRKCD,PTPN6,RAP2B,SHH,SLC4A1,STXBP1,STXBP3,SYK,TFPI,TLN1,TLR4,TXK,TYRO3,DGKD,AP3B1,SH2B3,VAV3,HPSE,ADAMTS13,METAP1,F11R,BLOC1S4,SCUBE1,WNT3A,JMJD1C,PEAR1,BLOC1S3
6_Member	GO Biological Processes	GO:0007596	blood coagulation	-21.9757	-19.9661	62/218	60,71,308,350,954,966,1192,1432,1906,2147,2149,2150,2161,2316,2677,2768,2776,2814,3170,3569,3572,3611,3673,3690,3998,4067,4627,4846,5156,5196,5294,5327,5336,5359,5478,5580,5777,5912,6469,6521,6812,6814,6850,7035,7094,7099,7294,7301,8527,8546,10019,10451,10855,11093,23173,50848,55330,80274,89780,221037,375033,388552	ACTB,ACTG1,ANXA5,APOH,ENTPD2,CD59,CLIC1,MAPK14,EDN1,F2,F2R,F2RL1,F12,FLNA,GGCX,GNA12,GNAQ,GP5,FOXA2,IL6,IL6ST,ILK,ITGA2,ITGB3,LMAN1,LYN,MYH9,NOS3,PDGFRA,PF4,PIK3CG,PLAT,PLCG2,PLSCR1,PPIA,PRKCD,PTPN6,RAP2B,SHH,SLC4A1,STXBP1,STXBP3,SYK,TFPI,TLN1,TLR4,TXK,TYRO3,DGKD,AP3B1,SH2B3,VAV3,HPSE,ADAMTS13,METAP1,F11R,BLOC1S4,SCUBE1,WNT3A,JMJD1C,PEAR1,BLOC1S3
6_Member	GO Biological Processes	GO:0050817	coagulation	-21.4071	-19.4328	62/223	60,71,308,350,954,966,1192,1432,1906,2147,2149,2150,2161,2316,2677,2768,2776,2814,3170,3569,3572,3611,3673,3690,3998,4067,4627,4846,5156,5196,5294,5327,5336,5359,5478,5580,5777,5912,6469,6521,6812,6814,6850,7035,7094,7099,7294,7301,8527,8546,10019,10451,10855,11093,23173,50848,55330,80274,89780,221037,375033,388552	ACTB,ACTG1,ANXA5,APOH,ENTPD2,CD59,CLIC1,MAPK14,EDN1,F2,F2R,F2RL1,F12,FLNA,GGCX,GNA12,GNAQ,GP5,FOXA2,IL6,IL6ST,ILK,ITGA2,ITGB3,LMAN1,LYN,MYH9,NOS3,PDGFRA,PF4,PIK3CG,PLAT,PLCG2,PLSCR1,PPIA,PRKCD,PTPN6,RAP2B,SHH,SLC4A1,STXBP1,STXBP3,SYK,TFPI,TLN1,TLR4,TXK,TYRO3,DGKD,AP3B1,SH2B3,VAV3,HPSE,ADAMTS13,METAP1,F11R,BLOC1S4,SCUBE1,WNT3A,JMJD1C,PEAR1,BLOC1S3
6_Member	GO Biological Processes	GO:0030168	platelet activation	-17.3671	-15.6255	41/124	60,71,954,1192,1432,2147,2149,2316,3569,3572,3611,3690,4067,4627,4846,5156,5196,5294,5336,5359,5478,5580,5777,5912,6812,6814,6850,7094,7099,7294,7301,8527,10019,10451,11093,23173,50848,55330,89780,375033,388552	ACTB,ACTG1,ENTPD2,CLIC1,MAPK14,F2,F2R,FLNA,IL6,IL6ST,ILK,ITGB3,LYN,MYH9,NOS3,PDGFRA,PF4,PIK3CG,PLCG2,PLSCR1,PPIA,PRKCD,PTPN6,RAP2B,STXBP1,STXBP3,SYK,TLN1,TLR4,TXK,TYRO3,DGKD,SH2B3,VAV3,ADAMTS13,METAP1,F11R,BLOC1S4,WNT3A,PEAR1,BLOC1S3
6_Member	GO Biological Processes	GO:0070527	platelet aggregation	-13.9253	-12.3877	27/68	60,71,1192,2316,3569,3572,3611,3690,4067,4627,5156,5294,5478,5580,5777,5912,6812,6814,6850,7094,7301,10019,23173,50848,55330,89780,375033	ACTB,ACTG1,CLIC1,FLNA,IL6,IL6ST,ILK,ITGB3,LYN,MYH9,PDGFRA,PIK3CG,PPIA,PRKCD,PTPN6,RAP2B,STXBP1,STXBP3,SYK,TLN1,TYRO3,SH2B3,METAP1,F11R,BLOC1S4,WNT3A,PEAR1
6_Member	GO Biological Processes	GO:0034109	homotypic cell-cell adhesion	-13.7098	-12.1806	31/91	60,71,1048,1192,1824,2316,3569,3572,3611,3690,3956,4067,4627,5156,5294,5478,5580,5777,5912,6812,6814,6850,7094,7301,8600,10019,23173,50848,55330,89780,375033	ACTB,ACTG1,CEACAM5,CLIC1,DSC2,FLNA,IL6,IL6ST,ILK,ITGB3,LGALS1,LYN,MYH9,PDGFRA,PIK3CG,PPIA,PRKCD,PTPN6,RAP2B,STXBP1,STXBP3,SYK,TLN1,TYRO3,TNFSF11,SH2B3,METAP1,F11R,BLOC1S4,WNT3A,PEAR1
7_Summary	Reactome Gene Sets	R-HSA-5663202	Diseases of signal transduction by growth factor receptors and second messengers	-46.9802	-43.6598	128/433	60,71,182,207,391,409,613,673,805,808,818,867,942,1024,1026,1027,1385,1487,1499,1848,1956,2033,2064,2065,2069,2099,2246,2247,2254,2260,2280,2309,2475,2648,2885,2932,3082,3265,3320,3516,3690,3845,4040,4067,4087,4089,4193,4233,4609,4627,4851,4869,4893,5037,5156,5245,5292,5293,5295,5434,5435,5441,5500,5501,5528,5529,5573,5594,5604,5683,5684,5692,5693,5700,5702,5709,5710,5719,5720,5721,5728,5781,5879…	ACTB,ACTG1,JAG1,AKT1,RHOG,ARRB2,BCR,BRAF,CALM2,CALM3,CAMK2G,CBL,CD86,CDK8,CDKN1A,CDKN1B,CREB1,CTBP1,CTNNB1,DUSP6,EGFR,EP300,ERBB2,ERBB3,EREG,ESR1,FGF1,FGF2,FGF9,FGFR1,FKBP1A,FOXO3,MTOR,KAT2A,GRB2,GSK3B,HGF,HRAS,HSP90AA1,RBPJ,ITGB3,KRAS,LRP6,LYN,SMAD2,SMAD4,MDM2,MET,MYC,MYH9,NOTCH1,NPM1,NRAS,PEBP1,PDGFRA,PHB,PIM1,PIK3CD,PIK3R1,POLR2E,POLR2F,POLR2L,PPP1CB,PPP1CC,PPP2R5D,PPP2R5E,PRKAR1A,MAPK1,MAP2K1…
7_Member	Reactome Gene Sets	R-HSA-5663202	Diseases of signal transduction by growth factor receptors and second messengers	-46.9802	-43.6598	128/433	60,71,182,207,391,409,613,673,805,808,818,867,942,1024,1026,1027,1385,1487,1499,1848,1956,2033,2064,2065,2069,2099,2246,2247,2254,2260,2280,2309,2475,2648,2885,2932,3082,3265,3320,3516,3690,3845,4040,4067,4087,4089,4193,4233,4609,4627,4851,4869,4893,5037,5156,5245,5292,5293,5295,5434,5435,5441,5500,5501,5528,5529,5573,5594,5604,5683,5684,5692,5693,5700,5702,5709,5710,5719,5720,5721,5728,5781,5879…	ACTB,ACTG1,JAG1,AKT1,RHOG,ARRB2,BCR,BRAF,CALM2,CALM3,CAMK2G,CBL,CD86,CDK8,CDKN1A,CDKN1B,CREB1,CTBP1,CTNNB1,DUSP6,EGFR,EP300,ERBB2,ERBB3,EREG,ESR1,FGF1,FGF2,FGF9,FGFR1,FKBP1A,FOXO3,MTOR,KAT2A,GRB2,GSK3B,HGF,HRAS,HSP90AA1,RBPJ,ITGB3,KRAS,LRP6,LYN,SMAD2,SMAD4,MDM2,MET,MYC,MYH9,NOTCH1,NPM1,NRAS,PEBP1,PDGFRA,PHB,PIM1,PIK3CD,PIK3R1,POLR2E,POLR2F,POLR2L,PPP1CB,PPP1CC,PPP2R5D,PPP2R5E,PRKAR1A,MAPK1,MAP2K1…
7_Member	Reactome Gene Sets	R-HSA-9006925	Intracellular signaling by second messengers	-28.7712	-26.4265	85/309	115,207,331,391,648,805,808,814,818,942,1026,1027,1385,1457,1956,1958,2064,2065,2069,2099,2246,2247,2254,2260,2309,2444,2475,2885,2932,3082,3708,3725,3838,4193,4233,5156,5293,5295,5371,5468,5528,5529,5573,5580,5594,5613,5683,5684,5692,5693,5700,5702,5709,5710,5719,5720,5721,5728,5781,5879,5928,5978,6233,7039,7157,7311,7314,7316,7874,8535,8660,8726,9965,10273,11060,23035,23112,23186,23512,27327,50…	ADCY9,AKT1,XIAP,RHOG,BMI1,CALM2,CALM3,CAMK4,CAMK2G,CD86,CDKN1A,CDKN1B,CREB1,CSNK2A1,EGFR,EGR1,ERBB2,ERBB3,EREG,ESR1,FGF1,FGF2,FGF9,FGFR1,FOXO3,FRK,MTOR,GRB2,GSK3B,HGF,ITPR1,JUN,KPNA2,MDM2,MET,PDGFRA,PIK3CD,PIK3R1,PML,PPARG,PPP2R5D,PPP2R5E,PRKAR1A,PRKCD,MAPK1,PRKX,PSMA2,PSMA3,PSMB4,PSMB5,PSMC1,PSMC3,PSMD3,PSMD4,PSMD13,PSME1,PSME2,PTEN,PTPN11,RAC1,RBBP4,REST,RPS27A,TGFA,TP53,UBA52,UBB,UBC,USP7,CBX4…
7_Member	Reactome Gene Sets	R-HSA-1257604	PIP3 activates AKT signaling	-26.0793	-23.8575	75/267	207,331,391,648,942,1026,1027,1385,1457,1956,1958,2064,2065,2069,2099,2246,2247,2254,2260,2309,2444,2475,2885,2932,3082,3725,4193,4233,5156,5293,5295,5371,5468,5528,5529,5594,5683,5684,5692,5693,5700,5702,5709,5710,5719,5720,5721,5728,5781,5879,5928,5978,6233,7039,7157,7311,7314,7316,7874,8535,8660,8726,9965,10273,11060,23035,23112,23186,23512,27327,50852,57690,58528,64121,84335	AKT1,XIAP,RHOG,BMI1,CD86,CDKN1A,CDKN1B,CREB1,CSNK2A1,EGFR,EGR1,ERBB2,ERBB3,EREG,ESR1,FGF1,FGF2,FGF9,FGFR1,FOXO3,FRK,MTOR,GRB2,GSK3B,HGF,JUN,MDM2,MET,PDGFRA,PIK3CD,PIK3R1,PML,PPARG,PPP2R5D,PPP2R5E,MAPK1,PSMA2,PSMA3,PSMB4,PSMB5,PSMC1,PSMC3,PSMD3,PSMD4,PSMD13,PSME1,PSME2,PTEN,PTPN11,RAC1,RBBP4,REST,RPS27A,TGFA,TP53,UBA52,UBB,UBC,USP7,CBX4,IRS2,EED,FGF19,STUB1,WWP2,PHLPP2,TNRC6B,RCOR1,SUZ12,TNRC6A,TR…
7_Member	Reactome Gene Sets	R-HSA-5683057	MAPK family signaling cascades	-23.6428	-21.5412	80/325	60,71,409,673,805,808,818,1844,1846,1847,1848,1956,2064,2065,2069,2246,2247,2254,2260,2309,2339,2885,2902,3082,3265,3569,3570,3572,3690,3725,3845,4233,4609,4893,5037,5156,5245,5295,5500,5501,5528,5529,5536,5594,5604,5683,5684,5692,5693,5700,5702,5709,5710,5719,5720,5721,5781,5879,5896,5908,5921,6233,6464,6712,7039,7094,7311,7314,7316,7529,8452,8550,8660,9965,10642,11221,23112,27327,54756,57690	ACTB,ACTG1,ARRB2,BRAF,CALM2,CALM3,CAMK2G,DUSP2,DUSP4,DUSP5,DUSP6,EGFR,ERBB2,ERBB3,EREG,FGF1,FGF2,FGF9,FGFR1,FOXO3,FNTA,GRB2,GRIN1,HGF,HRAS,IL6,IL6R,IL6ST,ITGB3,JUN,KRAS,MET,MYC,NRAS,PEBP1,PDGFRA,PHB,PIK3R1,PPP1CB,PPP1CC,PPP2R5D,PPP2R5E,PPP5C,MAPK1,MAP2K1,PSMA2,PSMA3,PSMB4,PSMB5,PSMC1,PSMC3,PSMD3,PSMD4,PSMD13,PSME1,PSME2,PTPN11,RAC1,RAG1,RAP1B,RASA1,RPS27A,SHC1,SPTBN2,TGFA,TLN1,UBA52,UBB,UBC,YWHAB…
7_Member	Reactome Gene Sets	R-HSA-5684996	MAPK1/MAPK3 signaling	-20.6095	-18.6711	70/286	60,71,409,673,805,808,818,1844,1846,1847,1848,1956,2064,2065,2069,2246,2247,2254,2260,2339,2885,2902,3082,3265,3569,3570,3572,3690,3845,4233,4893,5037,5156,5245,5295,5500,5501,5528,5529,5536,5594,5604,5683,5684,5692,5693,5700,5702,5709,5710,5719,5720,5721,5781,5908,5921,6233,6464,6712,7039,7094,7311,7314,7316,7529,8452,8660,9965,11221,54756	ACTB,ACTG1,ARRB2,BRAF,CALM2,CALM3,CAMK2G,DUSP2,DUSP4,DUSP5,DUSP6,EGFR,ERBB2,ERBB3,EREG,FGF1,FGF2,FGF9,FGFR1,FNTA,GRB2,GRIN1,HGF,HRAS,IL6,IL6R,IL6ST,ITGB3,KRAS,MET,NRAS,PEBP1,PDGFRA,PHB,PIK3R1,PPP1CB,PPP1CC,PPP2R5D,PPP2R5E,PPP5C,MAPK1,MAP2K1,PSMA2,PSMA3,PSMB4,PSMB5,PSMC1,PSMC3,PSMD3,PSMD4,PSMD13,PSME1,PSME2,PTPN11,RAP1B,RASA1,RPS27A,SHC1,SPTBN2,TGFA,TLN1,UBA52,UBB,UBC,YWHAB,CUL3,IRS2,FGF19,DUSP10,…
7_Member	Reactome Gene Sets	R-HSA-5673001	RAF/MAP kinase cascade	-18.5395	-16.7134	66/280	60,71,409,673,805,808,818,1844,1846,1847,1848,1956,2064,2065,2069,2246,2247,2254,2260,2339,2885,2902,3082,3265,3690,3845,4233,4893,5037,5156,5245,5295,5500,5501,5528,5529,5536,5594,5604,5683,5684,5692,5693,5700,5702,5709,5710,5719,5720,5721,5908,5921,6233,6464,6712,7039,7094,7311,7314,7316,7529,8452,8660,9965,11221,54756	ACTB,ACTG1,ARRB2,BRAF,CALM2,CALM3,CAMK2G,DUSP2,DUSP4,DUSP5,DUSP6,EGFR,ERBB2,ERBB3,EREG,FGF1,FGF2,FGF9,FGFR1,FNTA,GRB2,GRIN1,HGF,HRAS,ITGB3,KRAS,MET,NRAS,PEBP1,PDGFRA,PHB,PIK3R1,PPP1CB,PPP1CC,PPP2R5D,PPP2R5E,PPP5C,MAPK1,MAP2K1,PSMA2,PSMA3,PSMB4,PSMB5,PSMC1,PSMC3,PSMD3,PSMD4,PSMD13,PSME1,PSME2,RAP1B,RASA1,RPS27A,SHC1,SPTBN2,TGFA,TLN1,UBA52,UBB,UBC,YWHAB,CUL3,IRS2,FGF19,DUSP10,IL17RD
7_Member	Reactome Gene Sets	R-HSA-6807070	PTEN Regulation	-16.0319	-14.3674	42/140	207,331,648,1457,1958,2444,2475,3725,5371,5468,5594,5683,5684,5692,5693,5700,5702,5709,5710,5719,5720,5721,5728,5928,5978,6233,7157,7311,7314,7316,7874,8535,8726,10273,11060,23112,23186,23512,27327,57690,58528,64121	AKT1,XIAP,BMI1,CSNK2A1,EGR1,FRK,MTOR,JUN,PML,PPARG,MAPK1,PSMA2,PSMA3,PSMB4,PSMB5,PSMC1,PSMC3,PSMD3,PSMD4,PSMD13,PSME1,PSME2,PTEN,RBBP4,REST,RPS27A,TP53,UBA52,UBB,UBC,USP7,CBX4,EED,STUB1,WWP2,TNRC6B,RCOR1,SUZ12,TNRC6A,TNRC6C,RRAGD,RRAGC
7_Member	Reactome Gene Sets	R-HSA-2219528	PI3K/AKT Signaling in Cancer	-13.5302	-12.0149	33/104	207,391,942,1026,1027,1385,1956,2064,2065,2069,2099,2246,2247,2254,2260,2309,2475,2885,2932,3082,4193,4233,5156,5293,5295,5728,5781,5879,7039,8660,9965,50852,84335	AKT1,RHOG,CD86,CDKN1A,CDKN1B,CREB1,EGFR,ERBB2,ERBB3,EREG,ESR1,FGF1,FGF2,FGF9,FGFR1,FOXO3,MTOR,GRB2,GSK3B,HGF,MDM2,MET,PDGFRA,PIK3CD,PIK3R1,PTEN,PTPN11,RAC1,TGFA,IRS2,FGF19,TRAT1,AKT1S1
7_Member	Canonical Pathways	M276	PID FGF PATHWAY	-11.5482	-10.154	22/55	207,867,999,2246,2247,2254,2260,2353,2885,3082,3725,4233,4318,5295,5594,5781,6464,6696,6772,6777,9965,54756	AKT1,CBL,CDH1,FGF1,FGF2,FGF9,FGFR1,FOS,GRB2,HGF,JUN,MET,MMP9,PIK3R1,MAPK1,PTPN11,SHC1,SPP1,STAT1,STAT5B,FGF19,IL17RD
7_Member	Reactome Gene Sets	R-HSA-199418	Negative regulation of the PI3K/AKT network	-9.47347	-8.21075	29/113	207,391,942,1956,2064,2065,2069,2099,2246,2247,2254,2260,2885,3082,4233,5156,5293,5295,5528,5529,5594,5728,5781,5879,7039,8660,9965,23035,50852	AKT1,RHOG,CD86,EGFR,ERBB2,ERBB3,EREG,ESR1,FGF1,FGF2,FGF9,FGFR1,GRB2,HGF,MET,PDGFRA,PIK3CD,PIK3R1,PPP2R5D,PPP2R5E,MAPK1,PTEN,PTPN11,RAC1,TGFA,IRS2,FGF19,PHLPP2,TRAT1
7_Member	Reactome Gene Sets	R-HSA-2219530	Constitutive Signaling by Aberrant PI3K in Cancer	-8.93238	-7.70707	23/78	391,942,1956,2064,2065,2069,2099,2246,2247,2254,2260,2885,3082,4233,5156,5293,5295,5781,5879,7039,8660,9965,50852	RHOG,CD86,EGFR,ERBB2,ERBB3,EREG,ESR1,FGF1,FGF2,FGF9,FGFR1,GRB2,HGF,MET,PDGFRA,PIK3CD,PIK3R1,PTPN11,RAC1,TGFA,IRS2,FGF19,TRAT1
7_Member	Reactome Gene Sets	R-HSA-6811558	PI5P, PP2A and IER3 Regulate PI3K/AKT Signaling	-8.79011	-7.577	27/106	207,391,942,1956,2064,2065,2069,2099,2246,2247,2254,2260,2885,3082,4233,5156,5293,5295,5528,5529,5594,5781,5879,7039,8660,9965,50852	AKT1,RHOG,CD86,EGFR,ERBB2,ERBB3,EREG,ESR1,FGF1,FGF2,FGF9,FGFR1,GRB2,HGF,MET,PDGFRA,PIK3CD,PIK3R1,PPP2R5D,PPP2R5E,MAPK1,PTPN11,RAC1,TGFA,IRS2,FGF19,TRAT1
8_Summary	GO Biological Processes	GO:0010942	positive regulation of cell death	-46.7427	-43.4602	155/618	133,142,207,356,387,388,409,472,578,581,637,650,655,665,694,708,1019,1020,1026,1027,1191,1385,1490,1499,1509,1522,1540,1545,1612,1616,1654,1723,1785,1848,1869,1958,1984,2150,2309,2353,2475,2932,3146,3202,3209,3329,3399,3456,3458,3482,3569,3624,3688,3725,3939,4067,4170,4217,4293,4294,4318,4487,4504,4843,4851,4853,4914,5074,5245,5293,5326,5366,5371,5468,5580,5621,5728,5743,5916,5978,6154,6194,6201,…	ADM,PARP1,AKT1,FASLG,RHOA,RHOB,ARRB2,ATM,BAK1,BAX,BID,BMP2,BMP7,BNIP3L,BTG1,C1QBP,CDK4,CDK5,CDKN1A,CDKN1B,CLU,CREB1,CCN2,CTNNB1,CTSD,CTSZ,CYLD,CYP1B1,DAPK1,DAXX,DDX3X,DHODH,DNM2,DUSP6,E2F1,EGR1,EIF5A,F2RL1,FOXO3,FOS,MTOR,GSK3B,HMGB1,HOXA5,HOXA13,HSPD1,ID3,IFNB1,IFNG,IGF2R,IL6,INHBA,ITGB1,JUN,LDHA,LYN,MCL1,MAP3K5,MAP3K9,MAP3K10,MMP9,MSX1,MT3,NOS2,NOTCH1,NOTCH2,NTRK1,PAWR,PHB,PIK3CD,PLAGL2,PMAIP1,P…
8_Member	GO Biological Processes	GO:0010942	positive regulation of cell death	-46.7427	-43.4602	155/618	133,142,207,356,387,388,409,472,578,581,637,650,655,665,694,708,1019,1020,1026,1027,1191,1385,1490,1499,1509,1522,1540,1545,1612,1616,1654,1723,1785,1848,1869,1958,1984,2150,2309,2353,2475,2932,3146,3202,3209,3329,3399,3456,3458,3482,3569,3624,3688,3725,3939,4067,4170,4217,4293,4294,4318,4487,4504,4843,4851,4853,4914,5074,5245,5293,5326,5366,5371,5468,5580,5621,5728,5743,5916,5978,6154,6194,6201,…	ADM,PARP1,AKT1,FASLG,RHOA,RHOB,ARRB2,ATM,BAK1,BAX,BID,BMP2,BMP7,BNIP3L,BTG1,C1QBP,CDK4,CDK5,CDKN1A,CDKN1B,CLU,CREB1,CCN2,CTNNB1,CTSD,CTSZ,CYLD,CYP1B1,DAPK1,DAXX,DDX3X,DHODH,DNM2,DUSP6,E2F1,EGR1,EIF5A,F2RL1,FOXO3,FOS,MTOR,GSK3B,HMGB1,HOXA5,HOXA13,HSPD1,ID3,IFNB1,IFNG,IGF2R,IL6,INHBA,ITGB1,JUN,LDHA,LYN,MCL1,MAP3K5,MAP3K9,MAP3K10,MMP9,MSX1,MT3,NOS2,NOTCH1,NOTCH2,NTRK1,PAWR,PHB,PIK3CD,PLAGL2,PMAIP1,P…
8_Member	GO Biological Processes	GO:0043068	positive regulation of programmed cell death	-43.1831	-40.0519	141/555	133,207,356,387,388,409,472,578,581,637,650,655,665,694,708,1019,1020,1026,1191,1385,1499,1509,1522,1540,1545,1612,1654,1723,1785,1848,1869,1984,2150,2309,3146,3202,3209,3329,3399,3456,3458,3482,3569,3624,3688,3725,3939,4067,4170,4217,4293,4294,4318,4487,4843,4851,4853,4914,5074,5293,5326,5366,5371,5468,5580,5621,5728,5743,5916,5978,6154,6194,6201,6272,6416,6421,6498,6647,6648,6659,6733,6789,6850…	ADM,AKT1,FASLG,RHOA,RHOB,ARRB2,ATM,BAK1,BAX,BID,BMP2,BMP7,BNIP3L,BTG1,C1QBP,CDK4,CDK5,CDKN1A,CLU,CREB1,CTNNB1,CTSD,CTSZ,CYLD,CYP1B1,DAPK1,DDX3X,DHODH,DNM2,DUSP6,E2F1,EIF5A,F2RL1,FOXO3,HMGB1,HOXA5,HOXA13,HSPD1,ID3,IFNB1,IFNG,IGF2R,IL6,INHBA,ITGB1,JUN,LDHA,LYN,MCL1,MAP3K5,MAP3K9,MAP3K10,MMP9,MSX1,NOS2,NOTCH1,NOTCH2,NTRK1,PAWR,PIK3CD,PLAGL2,PMAIP1,PML,PPARG,PRKCD,PRNP,PTEN,PTGS2,RARG,REST,RPL26,RPS6…
8_Member	GO Biological Processes	GO:0043065	positive regulation of apoptotic process	-40.5935	-37.6297	135/539	133,207,356,387,388,409,472,578,581,637,650,655,665,694,708,1019,1020,1191,1385,1499,1509,1522,1540,1545,1612,1654,1723,1785,1848,1869,1984,2309,3146,3202,3209,3329,3399,3456,3458,3482,3569,3624,3688,3725,3939,4067,4170,4217,4293,4294,4318,4487,4851,4853,5074,5293,5326,5366,5371,5468,5580,5621,5728,5743,5916,5978,6154,6194,6201,6272,6416,6421,6498,6647,6648,6659,6733,6789,7042,7046,7098,7124,7157…	ADM,AKT1,FASLG,RHOA,RHOB,ARRB2,ATM,BAK1,BAX,BID,BMP2,BMP7,BNIP3L,BTG1,C1QBP,CDK4,CDK5,CLU,CREB1,CTNNB1,CTSD,CTSZ,CYLD,CYP1B1,DAPK1,DDX3X,DHODH,DNM2,DUSP6,E2F1,EIF5A,FOXO3,HMGB1,HOXA5,HOXA13,HSPD1,ID3,IFNB1,IFNG,IGF2R,IL6,INHBA,ITGB1,JUN,LDHA,LYN,MCL1,MAP3K5,MAP3K9,MAP3K10,MMP9,MSX1,NOTCH1,NOTCH2,PAWR,PIK3CD,PLAGL2,PMAIP1,PML,PPARG,PRKCD,PRNP,PTEN,PTGS2,RARG,REST,RPL26,RPS6,RPS7,SORT1,MAP2K4,SFPQ,…
9_Summary	GO Biological Processes	GO:0001817	regulation of cytokine production	-46.5099	-43.2622	179/799	116,225,351,409,490,657,672,708,718,728,814,861,920,942,961,1054,1191,1385,1432,1540,1545,1604,1654,1660,1903,1958,1969,2069,2147,2149,2150,2268,2627,2629,2648,3077,3082,3106,3146,3148,3265,3303,3304,3320,3329,3456,3458,3459,3479,3552,3566,3569,3570,3572,3595,3606,3624,3659,3662,3696,4067,4089,4092,4179,4838,4843,4860,5027,5142,5196,5245,5293,5294,5295,5336,5371,5465,5552,5590,5606,5621,5743,5777…	ADCYAP1,ABCD2,APP,ARRB2,ATP2B1,BMPR1A,BRCA1,C1QBP,C3,C5AR1,CAMK4,RUNX1,CD4,CD86,CD47,CEBPG,CLU,CREB1,MAPK14,CYLD,CYP1B1,CD55,DDX3X,DHX9,S1PR3,EGR1,EPHA2,EREG,F2,F2R,F2RL1,FGR,GATA6,GBA,KAT2A,HFE,HGF,HLA-B,HMGB1,HMGB2,HRAS,HSPA1A,HSPA1B,HSP90AA1,HSPD1,IFNB1,IFNG,IFNGR1,IGF1,IL1A,IL4R,IL6,IL6R,IL6ST,IL12RB2,IL18,INHBA,IRF1,IRF4,ITGB8,LYN,SMAD4,SMAD7,CD46,NODAL,NOS2,PNP,P2RX7,PDE4B,PF4,PHB,PIK3CD,PI…
9_Member	GO Biological Processes	GO:0001817	regulation of cytokine production	-46.5099	-43.2622	179/799	116,225,351,409,490,657,672,708,718,728,814,861,920,942,961,1054,1191,1385,1432,1540,1545,1604,1654,1660,1903,1958,1969,2069,2147,2149,2150,2268,2627,2629,2648,3077,3082,3106,3146,3148,3265,3303,3304,3320,3329,3456,3458,3459,3479,3552,3566,3569,3570,3572,3595,3606,3624,3659,3662,3696,4067,4089,4092,4179,4838,4843,4860,5027,5142,5196,5245,5293,5294,5295,5336,5371,5465,5552,5590,5606,5621,5743,5777…	ADCYAP1,ABCD2,APP,ARRB2,ATP2B1,BMPR1A,BRCA1,C1QBP,C3,C5AR1,CAMK4,RUNX1,CD4,CD86,CD47,CEBPG,CLU,CREB1,MAPK14,CYLD,CYP1B1,CD55,DDX3X,DHX9,S1PR3,EGR1,EPHA2,EREG,F2,F2R,F2RL1,FGR,GATA6,GBA,KAT2A,HFE,HGF,HLA-B,HMGB1,HMGB2,HRAS,HSPA1A,HSPA1B,HSP90AA1,HSPD1,IFNB1,IFNG,IFNGR1,IGF1,IL1A,IL4R,IL6,IL6R,IL6ST,IL12RB2,IL18,INHBA,IRF1,IRF4,ITGB8,LYN,SMAD4,SMAD7,CD46,NODAL,NOS2,PNP,P2RX7,PDE4B,PF4,PHB,PIK3CD,PI…
9_Member	GO Biological Processes	GO:0001819	positive regulation of cytokine production	-34.5099	-31.8472	116/467	116,351,657,672,718,728,814,861,920,942,1054,1191,1385,1432,1545,1604,1654,1660,1958,2069,2149,2150,2268,2627,2648,3082,3146,3148,3265,3303,3304,3320,3329,3458,3459,3552,3566,3569,3570,3572,3595,3606,3659,3662,4179,4838,4843,4860,5027,5142,5196,5245,5293,5294,5295,5336,5590,5743,5781,6504,6647,6772,6774,6777,6850,6868,7040,7098,7099,7100,7124,7186,7291,7294,7474,7494,8013,8140,8877,8915,9370,1014…	ADCYAP1,APP,BMPR1A,BRCA1,C3,C5AR1,CAMK4,RUNX1,CD4,CD86,CEBPG,CLU,CREB1,MAPK14,CYP1B1,CD55,DDX3X,DHX9,EGR1,EREG,F2R,F2RL1,FGR,GATA6,KAT2A,HGF,HMGB1,HMGB2,HRAS,HSPA1A,HSPA1B,HSP90AA1,HSPD1,IFNG,IFNGR1,IL1A,IL4R,IL6,IL6R,IL6ST,IL12RB2,IL18,IRF1,IRF4,CD46,NODAL,NOS2,PNP,P2RX7,PDE4B,PF4,PHB,PIK3CD,PIK3CG,PIK3R1,PLCG2,PRKCZ,PTGS2,PTPN11,SLAMF1,SOD1,STAT1,STAT3,STAT5B,SYK,ADAM17,TGFB1,TLR3,TLR4,TLR5,TNF…
9_Member	GO Biological Processes	GO:0001818	negative regulation of cytokine production	-14.9604	-13.3659	70/359	225,409,490,708,1540,1969,2147,2150,2627,2629,3077,3082,3146,3456,3458,3479,3569,3624,4092,5371,5465,5552,5621,5777,5879,5966,6301,6504,7040,7042,7099,7124,7128,7291,7430,7528,8832,9252,9370,10204,10225,10293,10333,10365,11213,23405,23512,26146,26191,27242,27250,28951,51665,54106,54206,54476,54941,58509,79132,79594,79671,80762,83737,84868,114899,149233,171389,353514,406943,406985	ABCD2,ARRB2,ATP2B1,C1QBP,CYLD,EPHA2,F2,F2RL1,GATA6,GBA,HFE,HGF,HMGB1,IFNB1,IFNG,IGF1,IL6,INHBA,SMAD7,PML,PPARA,SRGN,PRNP,PTPN6,RAC1,REL,SARS1,SLAMF1,TGFB1,TGFB2,TLR4,TNF,TNFAIP3,TWIST1,EZR,YY1,CD84,RPS6KA5,ADIPOQ,NUTF2,CD96,TRAIP,TLR6,KLF2,IRAK3,DICER1,SUZ12,TRAF3IP1,PTPN22,TNFRSF21,PDCD4,TRIB2,ASB1,TLR9,ERRFI1,RNF216,RNF125,CACTIN,DHX58,MUL1,NLRX1,NDFIP1,ITCH,HAVCR2,C1QTNF3,IL23R,NLRP6,LILRA5,MI…
10_Summary	GO Biological Processes	GO:0001568	blood vessel development	-46.2876	-43.072	175/771	71,90,94,133,182,196,207,285,350,356,387,388,578,581,655,657,659,672,694,718,728,861,1012,1045,1277,1278,1282,1285,1289,1432,1482,1490,1499,1545,1870,1890,1906,1942,1958,1969,2022,2050,2064,2069,2113,2246,2247,2296,2316,2523,2627,2737,2876,3037,3082,3099,3146,3202,3209,3340,3516,3552,3569,3570,3606,3678,3687,3688,3690,3696,3725,3949,4017,4066,4086,4092,4193,4215,4627,4638,4814,4838,4846,4851,4853…	ACTG1,ACVR1,ACVRL1,ADM,JAG1,AHR,AKT1,ANGPT2,APOH,FASLG,RHOA,RHOB,BAK1,BAX,BMP7,BMPR1A,BMPR2,BRCA1,BTG1,C3,C5AR1,RUNX1,CDH13,CDX2,COL1A1,COL1A2,COL4A1,COL4A3,COL5A1,MAPK14,NKX2-5,CCN2,CTNNB1,CYP1B1,E2F2,TYMP,EDN1,EFNA1,EGR1,EPHA2,ENG,EPHB4,ERBB2,EREG,ETS1,FGF1,FGF2,FOXC1,FLNA,FUT1,GATA6,GLI3,GPX1,HAS2,HGF,HK2,HMGB1,HOXA5,HOXA13,NDST1,RBPJ,IL1A,IL6,IL6R,IL18,ITGA5,ITGAX,ITGB1,ITGB3,ITGB8,JUN,LDLR,L…
10_Member	GO Biological Processes	GO:0001568	blood vessel development	-46.2876	-43.072	175/771	71,90,94,133,182,196,207,285,350,356,387,388,578,581,655,657,659,672,694,718,728,861,1012,1045,1277,1278,1282,1285,1289,1432,1482,1490,1499,1545,1870,1890,1906,1942,1958,1969,2022,2050,2064,2069,2113,2246,2247,2296,2316,2523,2627,2737,2876,3037,3082,3099,3146,3202,3209,3340,3516,3552,3569,3570,3606,3678,3687,3688,3690,3696,3725,3949,4017,4066,4086,4092,4193,4215,4627,4638,4814,4838,4846,4851,4853…	ACTG1,ACVR1,ACVRL1,ADM,JAG1,AHR,AKT1,ANGPT2,APOH,FASLG,RHOA,RHOB,BAK1,BAX,BMP7,BMPR1A,BMPR2,BRCA1,BTG1,C3,C5AR1,RUNX1,CDH13,CDX2,COL1A1,COL1A2,COL4A1,COL4A3,COL5A1,MAPK14,NKX2-5,CCN2,CTNNB1,CYP1B1,E2F2,TYMP,EDN1,EFNA1,EGR1,EPHA2,ENG,EPHB4,ERBB2,EREG,ETS1,FGF1,FGF2,FOXC1,FLNA,FUT1,GATA6,GLI3,GPX1,HAS2,HGF,HK2,HMGB1,HOXA5,HOXA13,NDST1,RBPJ,IL1A,IL6,IL6R,IL18,ITGA5,ITGAX,ITGB1,ITGB3,ITGB8,JUN,LDLR,L…
10_Member	GO Biological Processes	GO:0030335	positive regulation of cell migration	-40.3397	-37.393	137/556	71,81,90,207,351,382,387,388,472,498,596,650,655,659,708,728,811,961,977,1012,1235,1277,1432,1435,1906,1956,2113,2149,2150,2241,2246,2247,2254,2260,2268,2316,2358,2475,2523,2821,3037,3082,3146,3175,3265,3458,3479,3480,3569,3570,3611,3673,3675,3687,3688,3690,4067,4150,4193,4215,4233,4318,4638,4641,4846,4851,5156,5286,5293,5294,5295,5336,5530,5594,5606,5629,5743,5879,6239,6355,6386,6504,6648,6667,6…	ACTG1,ACTN4,ACVR1,AKT1,APP,ARF6,RHOA,RHOB,ATM,ATP5F1A,BCL2,BMP2,BMP7,BMPR2,C1QBP,C5AR1,CALR,CD47,CD151,CDH13,CCR6,COL1A1,MAPK14,CSF1,EDN1,EGFR,ETS1,F2R,F2RL1,FER,FGF1,FGF2,FGF9,FGFR1,FGR,FLNA,FPR2,MTOR,FUT1,GPI,HAS2,HGF,HMGB1,ONECUT1,HRAS,IFNG,IGF1,IGF1R,IL6,IL6R,ILK,ITGA2,ITGA3,ITGAX,ITGB1,ITGB3,LYN,MAZ,MDM2,MAP3K3,MET,MMP9,MYLK,MYO1C,NOS3,NOTCH1,PDGFRA,PIK3C2A,PIK3CD,PIK3CG,PIK3R1,PLCG2,PPP3CA,…
10_Member	GO Biological Processes	GO:0048514	blood vessel morphogenesis	-39.4687	-36.5384	154/693	71,90,94,133,182,207,285,350,356,387,388,578,581,657,659,672,694,718,728,861,1012,1282,1285,1432,1482,1490,1499,1545,1870,1890,1906,1942,1969,2022,2050,2064,2069,2113,2246,2247,2296,2316,2523,2627,2876,3037,3082,3099,3146,3202,3209,3516,3552,3569,3606,3678,3687,3688,3690,3696,3725,3949,4017,4086,4092,4215,4627,4638,4814,4838,4846,4851,4853,5156,5196,5230,5286,5293,5294,5316,5371,5468,5534,5613,56…	ACTG1,ACVR1,ACVRL1,ADM,JAG1,AKT1,ANGPT2,APOH,FASLG,RHOA,RHOB,BAK1,BAX,BMPR1A,BMPR2,BRCA1,BTG1,C3,C5AR1,RUNX1,CDH13,COL4A1,COL4A3,MAPK14,NKX2-5,CCN2,CTNNB1,CYP1B1,E2F2,TYMP,EDN1,EFNA1,EPHA2,ENG,EPHB4,ERBB2,EREG,ETS1,FGF1,FGF2,FOXC1,FLNA,FUT1,GATA6,GPX1,HAS2,HGF,HK2,HMGB1,HOXA5,HOXA13,RBPJ,IL1A,IL6,IL18,ITGA5,ITGAX,ITGB1,ITGB3,ITGB8,JUN,LDLR,LOXL2,SMAD1,SMAD7,MAP3K3,MYH9,MYLK,NINJ1,NODAL,NOS3,NOTCH…
10_Member	GO Biological Processes	GO:2000147	positive regulation of cell motility	-39.2895	-36.3902	139/582	71,81,90,207,351,382,387,388,472,498,596,650,655,659,708,728,811,961,977,1012,1235,1277,1432,1435,1906,1956,2113,2149,2150,2241,2246,2247,2254,2260,2268,2316,2358,2475,2523,2821,3037,3082,3146,3175,3265,3458,3479,3480,3569,3570,3611,3673,3675,3687,3688,3690,4067,4150,4193,4215,4233,4318,4638,4641,4846,4851,5156,5286,5293,5294,5295,5336,5530,5594,5606,5629,5743,5879,6239,6355,6386,6504,6648,6667,6…	ACTG1,ACTN4,ACVR1,AKT1,APP,ARF6,RHOA,RHOB,ATM,ATP5F1A,BCL2,BMP2,BMP7,BMPR2,C1QBP,C5AR1,CALR,CD47,CD151,CDH13,CCR6,COL1A1,MAPK14,CSF1,EDN1,EGFR,ETS1,F2R,F2RL1,FER,FGF1,FGF2,FGF9,FGFR1,FGR,FLNA,FPR2,MTOR,FUT1,GPI,HAS2,HGF,HMGB1,ONECUT1,HRAS,IFNG,IGF1,IGF1R,IL6,IL6R,ILK,ITGA2,ITGA3,ITGAX,ITGB1,ITGB3,LYN,MAZ,MDM2,MAP3K3,MET,MMP9,MYLK,MYO1C,NOS3,NOTCH1,PDGFRA,PIK3C2A,PIK3CD,PIK3CG,PIK3R1,PLCG2,PPP3CA,…
10_Member	GO Biological Processes	GO:0040017	positive regulation of locomotion	-38.7046	-35.8343	140/596	71,81,90,207,351,382,387,388,472,498,596,650,655,659,708,728,811,961,977,1012,1233,1235,1277,1432,1435,1906,1956,2113,2149,2150,2241,2246,2247,2254,2260,2268,2316,2358,2475,2523,2821,3037,3082,3146,3175,3265,3458,3479,3480,3569,3570,3611,3673,3675,3687,3688,3690,4067,4150,4193,4215,4233,4318,4638,4641,4846,4851,5156,5286,5293,5294,5295,5336,5530,5594,5606,5629,5743,5879,6239,6355,6386,6504,6648,6…	ACTG1,ACTN4,ACVR1,AKT1,APP,ARF6,RHOA,RHOB,ATM,ATP5F1A,BCL2,BMP2,BMP7,BMPR2,C1QBP,C5AR1,CALR,CD47,CD151,CDH13,CCR4,CCR6,COL1A1,MAPK14,CSF1,EDN1,EGFR,ETS1,F2R,F2RL1,FER,FGF1,FGF2,FGF9,FGFR1,FGR,FLNA,FPR2,MTOR,FUT1,GPI,HAS2,HGF,HMGB1,ONECUT1,HRAS,IFNG,IGF1,IGF1R,IL6,IL6R,ILK,ITGA2,ITGA3,ITGAX,ITGB1,ITGB3,LYN,MAZ,MDM2,MAP3K3,MET,MMP9,MYLK,MYO1C,NOS3,NOTCH1,PDGFRA,PIK3C2A,PIK3CD,PIK3CG,PIK3R1,PLCG2,PP…
10_Member	GO Biological Processes	GO:0051272	positive regulation of cellular component movement	-38.2299	-35.3733	139/594	71,81,90,207,351,382,387,388,472,498,596,650,655,659,708,728,811,961,977,1012,1235,1277,1432,1435,1906,1956,2113,2149,2150,2241,2246,2247,2254,2260,2268,2316,2358,2475,2523,2821,3037,3082,3146,3175,3265,3458,3479,3480,3569,3570,3611,3673,3675,3687,3688,3690,4067,4150,4193,4215,4233,4318,4638,4641,4846,4851,5156,5286,5293,5294,5295,5336,5530,5594,5606,5629,5743,5879,6239,6355,6386,6504,6648,6667,6…	ACTG1,ACTN4,ACVR1,AKT1,APP,ARF6,RHOA,RHOB,ATM,ATP5F1A,BCL2,BMP2,BMP7,BMPR2,C1QBP,C5AR1,CALR,CD47,CD151,CDH13,CCR6,COL1A1,MAPK14,CSF1,EDN1,EGFR,ETS1,F2R,F2RL1,FER,FGF1,FGF2,FGF9,FGFR1,FGR,FLNA,FPR2,MTOR,FUT1,GPI,HAS2,HGF,HMGB1,ONECUT1,HRAS,IFNG,IGF1,IGF1R,IL6,IL6R,ILK,ITGA2,ITGA3,ITGAX,ITGB1,ITGB3,LYN,MAZ,MDM2,MAP3K3,MET,MMP9,MYLK,MYO1C,NOS3,NOTCH1,PDGFRA,PIK3C2A,PIK3CD,PIK3CG,PIK3R1,PLCG2,PPP3CA,…
10_Member	GO Biological Processes	GO:0001667	ameboidal-type cell migration	-35.5021	-32.7799	119/478	90,94,207,285,350,382,387,388,498,655,659,708,811,1012,1235,1432,1545,1906,1942,1969,2022,2050,2113,2196,2241,2246,2247,2260,2475,2523,2697,2768,2821,2876,3037,3146,3458,3611,3673,3675,3688,3690,3695,3964,4017,4163,4215,4233,4318,4627,4838,4846,4851,5286,5293,5294,5336,5339,5371,5468,5586,5606,5613,5629,5728,5743,5781,5879,6091,6239,6286,6385,6469,6667,6678,6772,6863,6868,6899,7026,7040,7042,7046…	ACVR1,ACVRL1,AKT1,ANGPT2,APOH,ARF6,RHOA,RHOB,ATP5F1A,BMP7,BMPR2,C1QBP,CALR,CDH13,CCR6,MAPK14,CYP1B1,EDN1,EFNA1,EPHA2,ENG,EPHB4,ETS1,FAT2,FER,FGF1,FGF2,FGFR1,MTOR,FUT1,GJA1,GNA12,GPI,GPX1,HAS2,HMGB1,IFNG,ILK,ITGA2,ITGA3,ITGB1,ITGB3,ITGB7,LGALS8,LOXL2,MCC,MAP3K3,MET,MMP9,MYH9,NODAL,NOS3,NOTCH1,PIK3C2A,PIK3CD,PIK3CG,PLCG2,PLEC,PML,PPARG,PKN2,MAP2K3,PRKX,PROX1,PTEN,PTGS2,PTPN11,RAC1,ROBO1,RREB1,S100P…
10_Member	GO Biological Processes	GO:0050673	epithelial cell proliferation	-35.4718	-32.7633	115/450	94,207,350,367,498,581,599,650,653,657,659,728,864,1012,1021,1027,1028,1285,1499,1956,1969,2064,2069,2081,2099,2246,2247,2254,2260,2475,2523,2697,2810,2876,3037,3082,3146,3148,3202,3265,3398,3479,3569,3690,4017,4163,4221,4609,4781,4831,4838,4851,4853,4893,5241,5293,5314,5468,5594,5604,5613,5629,5728,5813,5925,6091,6239,6469,6667,6678,6772,6774,6868,6899,6934,7026,7039,7040,7042,7046,7049,7124,712…	ACVRL1,AKT1,APOH,AR,ATP5F1A,BAX,BCL2L2,BMP2,BMP5,BMPR1A,BMPR2,C5AR1,RUNX3,CDH13,CDK6,CDKN1B,CDKN1C,COL4A3,CTNNB1,EGFR,EPHA2,ERBB2,EREG,ERN1,ESR1,FGF1,FGF2,FGF9,FGFR1,MTOR,FUT1,GJA1,SFN,GPX1,HAS2,HGF,HMGB1,HMGB2,HOXA5,HRAS,ID2,IGF1,IL6,ITGB3,LOXL2,MCC,MEN1,MYC,NFIB,NME2,NODAL,NOTCH1,NOTCH2,NRAS,PGR,PIK3CD,PKHD1,PPARG,MAPK1,MAP2K1,PRKX,PROX1,PTEN,PURA,RB1,ROBO1,RREB1,SHH,SP1,SPARC,STAT1,STAT3,ADAM1…
10_Member	GO Biological Processes	GO:0001525	angiogenesis	-34.5556	-31.8841	134/600	71,90,94,133,182,207,285,350,356,387,388,672,694,718,728,861,1012,1282,1285,1432,1490,1499,1545,1870,1890,1906,1942,1969,2022,2050,2064,2069,2113,2246,2247,2296,2316,2523,2627,2876,3082,3099,3146,3202,3516,3552,3569,3606,3678,3687,3688,3690,3696,3725,4017,4086,4215,4627,4814,4838,4846,4851,4853,5156,5196,5230,5286,5293,5294,5316,5371,5468,5534,5613,5728,5743,6091,6301,6464,6469,6667,6678,6733,677…	ACTG1,ACVR1,ACVRL1,ADM,JAG1,AKT1,ANGPT2,APOH,FASLG,RHOA,RHOB,BRCA1,BTG1,C3,C5AR1,RUNX1,CDH13,COL4A1,COL4A3,MAPK14,CCN2,CTNNB1,CYP1B1,E2F2,TYMP,EDN1,EFNA1,EPHA2,ENG,EPHB4,ERBB2,EREG,ETS1,FGF1,FGF2,FOXC1,FLNA,FUT1,GATA6,GPX1,HGF,HK2,HMGB1,HOXA5,RBPJ,IL1A,IL6,IL18,ITGA5,ITGAX,ITGB1,ITGB3,ITGB8,JUN,LOXL2,SMAD1,MAP3K3,MYH9,NINJ1,NODAL,NOS3,NOTCH1,NOTCH2,PDGFRA,PF4,PGK1,PIK3C2A,PIK3CD,PIK3CG,PKNOX1,PML…
10_Member	GO Biological Processes	GO:0050678	regulation of epithelial cell proliferation	-30.119	-27.6968	99/392	94,207,350,367,498,581,650,653,657,659,728,864,1012,1021,1027,1028,1285,1499,1956,2064,2069,2246,2247,2254,2260,2475,2523,2697,2810,2876,3037,3146,3148,3202,3265,3479,3690,4163,4221,4609,4781,4831,4838,4851,4853,4893,5241,5293,5314,5468,5629,5728,5925,6091,6239,6469,6667,6678,6772,6774,6868,6899,6934,7026,7039,7040,7042,7046,7049,7124,7128,7291,7421,7422,7472,7474,7494,8013,8829,8837,10344,11221,…	ACVRL1,AKT1,APOH,AR,ATP5F1A,BAX,BMP2,BMP5,BMPR1A,BMPR2,C5AR1,RUNX3,CDH13,CDK6,CDKN1B,CDKN1C,COL4A3,CTNNB1,EGFR,ERBB2,EREG,FGF1,FGF2,FGF9,FGFR1,MTOR,FUT1,GJA1,SFN,GPX1,HAS2,HMGB1,HMGB2,HOXA5,HRAS,IGF1,ITGB3,MCC,MEN1,MYC,NFIB,NME2,NODAL,NOTCH1,NOTCH2,NRAS,PGR,PIK3CD,PKHD1,PPARG,PROX1,PTEN,RB1,ROBO1,RREB1,SHH,SP1,SPARC,STAT1,STAT3,ADAM17,TBX1,TCF7L2,NR2F2,TGFA,TGFB1,TGFB2,TGFBR1,TGFBR3,TNF,TNFAIP3,T…
10_Member	GO Biological Processes	GO:0010631	epithelial cell migration	-27.8457	-25.5522	91/359	94,207,285,350,382,387,388,498,659,811,1012,1235,1432,1545,1906,1942,1969,2050,2113,2196,2246,2247,2260,2475,2523,2821,2876,3037,3146,3458,3673,3675,3688,3690,3964,4017,4163,4215,4233,4318,4627,4846,4851,5286,5293,5294,5336,5468,5586,5606,5613,5629,5728,5743,5781,5879,6091,6239,6286,6667,6678,6772,6863,6868,7026,7040,7042,7046,7048,7124,7422,7474,8829,9448,9839,9922,10013,10755,11167,11221,11235,…	ACVRL1,AKT1,ANGPT2,APOH,ARF6,RHOA,RHOB,ATP5F1A,BMPR2,CALR,CDH13,CCR6,MAPK14,CYP1B1,EDN1,EFNA1,EPHA2,EPHB4,ETS1,FAT2,FGF1,FGF2,FGFR1,MTOR,FUT1,GPI,GPX1,HAS2,HMGB1,IFNG,ITGA2,ITGA3,ITGB1,ITGB3,LGALS8,LOXL2,MCC,MAP3K3,MET,MMP9,MYH9,NOS3,NOTCH1,PIK3C2A,PIK3CD,PIK3CG,PLCG2,PPARG,PKN2,MAP2K3,PRKX,PROX1,PTEN,PTGS2,PTPN11,RAC1,ROBO1,RREB1,S100P,SP1,SPARC,STAT1,TAC1,ADAM17,NR2F2,TGFB1,TGFB2,TGFBR1,TGFBR2,…
10_Member	GO Biological Processes	GO:0090130	tissue migration	-27.7544	-25.4683	92/367	70,94,207,285,350,382,387,388,498,659,811,1012,1235,1432,1545,1906,1942,1969,2050,2113,2196,2246,2247,2260,2475,2523,2821,2876,3037,3146,3458,3673,3675,3688,3690,3964,4017,4163,4215,4233,4318,4627,4846,4851,5286,5293,5294,5336,5468,5586,5606,5613,5629,5728,5743,5781,5879,6091,6239,6286,6667,6678,6772,6863,6868,7026,7040,7042,7046,7048,7124,7422,7474,8829,9448,9839,9922,10013,10755,11167,11221,112…	ACTC1,ACVRL1,AKT1,ANGPT2,APOH,ARF6,RHOA,RHOB,ATP5F1A,BMPR2,CALR,CDH13,CCR6,MAPK14,CYP1B1,EDN1,EFNA1,EPHA2,EPHB4,ETS1,FAT2,FGF1,FGF2,FGFR1,MTOR,FUT1,GPI,GPX1,HAS2,HMGB1,IFNG,ITGA2,ITGA3,ITGB1,ITGB3,LGALS8,LOXL2,MCC,MAP3K3,MET,MMP9,MYH9,NOS3,NOTCH1,PIK3C2A,PIK3CD,PIK3CG,PLCG2,PPARG,PKN2,MAP2K3,PRKX,PROX1,PTEN,PTGS2,PTPN11,RAC1,ROBO1,RREB1,S100P,SP1,SPARC,STAT1,TAC1,ADAM17,NR2F2,TGFB1,TGFB2,TGFBR1,T…
10_Member	GO Biological Processes	GO:0090132	epithelium migration	-27.5547	-25.2794	91/362	94,207,285,350,382,387,388,498,659,811,1012,1235,1432,1545,1906,1942,1969,2050,2113,2196,2246,2247,2260,2475,2523,2821,2876,3037,3146,3458,3673,3675,3688,3690,3964,4017,4163,4215,4233,4318,4627,4846,4851,5286,5293,5294,5336,5468,5586,5606,5613,5629,5728,5743,5781,5879,6091,6239,6286,6667,6678,6772,6863,6868,7026,7040,7042,7046,7048,7124,7422,7474,8829,9448,9839,9922,10013,10755,11167,11221,11235,…	ACVRL1,AKT1,ANGPT2,APOH,ARF6,RHOA,RHOB,ATP5F1A,BMPR2,CALR,CDH13,CCR6,MAPK14,CYP1B1,EDN1,EFNA1,EPHA2,EPHB4,ETS1,FAT2,FGF1,FGF2,FGFR1,MTOR,FUT1,GPI,GPX1,HAS2,HMGB1,IFNG,ITGA2,ITGA3,ITGB1,ITGB3,LGALS8,LOXL2,MCC,MAP3K3,MET,MMP9,MYH9,NOS3,NOTCH1,PIK3C2A,PIK3CD,PIK3CG,PLCG2,PPARG,PKN2,MAP2K3,PRKX,PROX1,PTEN,PTGS2,PTPN11,RAC1,ROBO1,RREB1,S100P,SP1,SPARC,STAT1,TAC1,ADAM17,NR2F2,TGFB1,TGFB2,TGFBR1,TGFBR2,…
10_Member	GO Biological Processes	GO:0010632	regulation of epithelial cell migration	-21.2895	-19.3205	72/293	94,207,285,350,382,387,388,498,659,811,1235,1432,1906,1942,1969,2113,2246,2247,2260,2475,2523,2821,3037,3146,3458,3673,3675,3690,4163,4215,4233,4318,4846,4851,5286,5293,5294,5336,5468,5606,5629,5728,5743,5879,6239,6667,6678,6863,6868,7026,7040,7042,7048,7124,7422,7474,8829,9448,9922,10013,11221,11235,23411,23473,25865,29775,51378,51466,116150,147372,406943,406985	ACVRL1,AKT1,ANGPT2,APOH,ARF6,RHOA,RHOB,ATP5F1A,BMPR2,CALR,CCR6,MAPK14,EDN1,EFNA1,EPHA2,ETS1,FGF1,FGF2,FGFR1,MTOR,FUT1,GPI,HAS2,HMGB1,IFNG,ITGA2,ITGA3,ITGB3,MCC,MAP3K3,MET,MMP9,NOS3,NOTCH1,PIK3C2A,PIK3CD,PIK3CG,PLCG2,PPARG,MAP2K3,PROX1,PTEN,PTGS2,RAC1,RREB1,SP1,SPARC,TAC1,ADAM17,NR2F2,TGFB1,TGFB2,TGFBR2,TNF,VEGFA,WNT5A,NRP1,MAP4K4,IQSEC1,HDAC6,DUSP10,PDCD10,SIRT1,CAPN7,PRKD2,CARD10,ANGPT4,EVL,NUS1…
10_Member	GO Biological Processes	GO:0010634	positive regulation of epithelial cell migration	-20.7927	-18.8476	54/177	207,382,388,498,659,811,1235,1432,1906,2113,2246,2247,2260,2475,2523,2821,3037,3146,3458,3673,3675,3690,4215,4233,4318,4846,5286,5293,5294,5336,5606,5629,5743,5879,6239,6667,6678,6863,6868,7040,7042,7048,7422,7474,8829,9448,9922,10013,23411,23473,25865,51378,116150,147372	AKT1,ARF6,RHOB,ATP5F1A,BMPR2,CALR,CCR6,MAPK14,EDN1,ETS1,FGF1,FGF2,FGFR1,MTOR,FUT1,GPI,HAS2,HMGB1,IFNG,ITGA2,ITGA3,ITGB3,MAP3K3,MET,MMP9,NOS3,PIK3C2A,PIK3CD,PIK3CG,PLCG2,MAP2K3,PROX1,PTGS2,RAC1,RREB1,SP1,SPARC,TAC1,ADAM17,TGFB1,TGFB2,TGFBR2,VEGFA,WNT5A,NRP1,MAP4K4,IQSEC1,HDAC6,SIRT1,CAPN7,PRKD2,ANGPT4,NUS1,CCBE1
10_Member	GO Biological Processes	GO:0043542	endothelial cell migration	-19.096	-17.2394	67/281	94,207,285,350,387,388,498,659,811,1012,1432,1545,1906,1942,1969,2050,2113,2246,2247,2260,2523,2821,2876,3146,3688,3690,3964,4017,4215,4233,4627,4846,4851,5286,5293,5294,5468,5606,5613,5629,5728,5743,5879,6091,6286,6667,6678,6772,6868,7026,7040,7046,7124,7422,7474,8829,10755,11167,11235,23411,25865,29775,51378,116150,147372,406943,406985	ACVRL1,AKT1,ANGPT2,APOH,RHOA,RHOB,ATP5F1A,BMPR2,CALR,CDH13,MAPK14,CYP1B1,EDN1,EFNA1,EPHA2,EPHB4,ETS1,FGF1,FGF2,FGFR1,FUT1,GPI,GPX1,HMGB1,ITGB1,ITGB3,LGALS8,LOXL2,MAP3K3,MET,MYH9,NOS3,NOTCH1,PIK3C2A,PIK3CD,PIK3CG,PPARG,MAP2K3,PRKX,PROX1,PTEN,PTGS2,RAC1,ROBO1,S100P,SP1,SPARC,STAT1,ADAM17,NR2F2,TGFB1,TGFBR1,TNF,VEGFA,WNT5A,NRP1,GIPC1,FSTL1,PDCD10,SIRT1,PRKD2,CARD10,ANGPT4,NUS1,CCBE1,MIR152,MIR200C
10_Member	GO Biological Processes	GO:0050679	positive regulation of epithelial cell proliferation	-18.5754	-16.7465	56/209	94,207,367,650,653,657,659,728,1012,1499,1956,2064,2246,2247,2254,2260,2475,3037,3146,3148,3265,3479,3690,4609,4831,4838,4851,4853,4893,5293,5314,5629,6239,6469,6667,6774,6868,6899,6934,7039,7046,7128,7291,7422,7472,7474,7494,8013,8829,8837,10344,23411,25865,89780,116844,120425	ACVRL1,AKT1,AR,BMP2,BMP5,BMPR1A,BMPR2,C5AR1,CDH13,CTNNB1,EGFR,ERBB2,FGF1,FGF2,FGF9,FGFR1,MTOR,HAS2,HMGB1,HMGB2,HRAS,IGF1,ITGB3,MYC,NME2,NODAL,NOTCH1,NOTCH2,NRAS,PIK3CD,PKHD1,PROX1,RREB1,SHH,SP1,STAT3,ADAM17,TBX1,TCF7L2,TGFA,TGFBR1,TNFAIP3,TWIST1,VEGFA,WNT2,WNT5A,XBP1,NR4A3,NRP1,CFLAR,CCL26,SIRT1,PRKD2,WNT3A,LRG1,JAML
10_Member	GO Biological Processes	GO:0045765	regulation of angiogenesis	-17.5324	-15.7782	73/346	94,133,285,350,356,388,672,694,718,728,861,1285,1499,1545,1870,1942,1969,2022,2064,2113,2246,2247,2296,2523,2627,3082,3099,3146,3202,3552,3569,3678,3687,3688,3696,4086,4814,4838,4846,5196,5230,5293,5371,5468,6301,6667,6678,6772,6774,7015,7042,7048,7058,7098,7124,7128,7291,7422,7453,7474,7494,8829,8877,10365,23166,23411,25865,27329,28996,51378,92140,116844,147372	ACVRL1,ADM,ANGPT2,APOH,FASLG,RHOB,BRCA1,BTG1,C3,C5AR1,RUNX1,COL4A3,CTNNB1,CYP1B1,E2F2,EFNA1,EPHA2,ENG,ERBB2,ETS1,FGF1,FGF2,FOXC1,FUT1,GATA6,HGF,HK2,HMGB1,HOXA5,IL1A,IL6,ITGA5,ITGAX,ITGB1,ITGB8,SMAD1,NINJ1,NODAL,NOS3,PF4,PGK1,PIK3CD,PML,PPARG,SARS1,SP1,SPARC,STAT1,STAT3,TERT,TGFB2,TGFBR2,THBS2,TLR3,TNF,TNFAIP3,TWIST1,VEGFA,WARS1,WNT5A,XBP1,NRP1,SPHK1,KLF2,STAB1,SIRT1,PRKD2,ANGPTL3,HIPK2,ANGPT4,MTD…
10_Member	GO Biological Processes	GO:1901342	regulation of vasculature development	-17.0976	-15.3663	73/352	94,133,285,350,356,388,672,694,718,728,861,1285,1499,1545,1870,1942,1969,2022,2064,2113,2246,2247,2296,2523,2627,3082,3099,3146,3202,3552,3569,3678,3687,3688,3696,4086,4814,4838,4846,5196,5230,5293,5371,5468,6301,6667,6678,6772,6774,7015,7042,7048,7058,7098,7124,7128,7291,7422,7453,7474,7494,8829,8877,10365,23166,23411,25865,27329,28996,51378,92140,116844,147372	ACVRL1,ADM,ANGPT2,APOH,FASLG,RHOB,BRCA1,BTG1,C3,C5AR1,RUNX1,COL4A3,CTNNB1,CYP1B1,E2F2,EFNA1,EPHA2,ENG,ERBB2,ETS1,FGF1,FGF2,FOXC1,FUT1,GATA6,HGF,HK2,HMGB1,HOXA5,IL1A,IL6,ITGA5,ITGAX,ITGB1,ITGB8,SMAD1,NINJ1,NODAL,NOS3,PF4,PGK1,PIK3CD,PML,PPARG,SARS1,SP1,SPARC,STAT1,STAT3,TERT,TGFB2,TGFBR2,THBS2,TLR3,TNF,TNFAIP3,TWIST1,VEGFA,WARS1,WNT5A,XBP1,NRP1,SPHK1,KLF2,STAB1,SIRT1,PRKD2,ANGPTL3,HIPK2,ANGPT4,MTD…
10_Member	GO Biological Processes	GO:0045766	positive regulation of angiogenesis	-15.8262	-14.1789	48/181	94,133,285,388,672,694,718,728,861,1545,2022,2113,2246,2247,2523,2627,3082,3099,3146,3552,3678,3687,3688,3696,4086,4814,4838,4846,5293,6667,6774,7015,7048,7098,7291,7422,7474,7494,8829,8877,23411,25865,27329,28996,51378,92140,116844,147372	ACVRL1,ADM,ANGPT2,RHOB,BRCA1,BTG1,C3,C5AR1,RUNX1,CYP1B1,ENG,ETS1,FGF1,FGF2,FUT1,GATA6,HGF,HK2,HMGB1,IL1A,ITGA5,ITGAX,ITGB1,ITGB8,SMAD1,NINJ1,NODAL,NOS3,PIK3CD,SP1,STAT3,TERT,TGFBR2,TLR3,TWIST1,VEGFA,WNT5A,XBP1,NRP1,SPHK1,SIRT1,PRKD2,ANGPTL3,HIPK2,ANGPT4,MTDH,LRG1,CCBE1
10_Member	GO Biological Processes	GO:1904018	positive regulation of vasculature development	-15.8262	-14.1789	48/181	94,133,285,388,672,694,718,728,861,1545,2022,2113,2246,2247,2523,2627,3082,3099,3146,3552,3678,3687,3688,3696,4086,4814,4838,4846,5293,6667,6774,7015,7048,7098,7291,7422,7474,7494,8829,8877,23411,25865,27329,28996,51378,92140,116844,147372	ACVRL1,ADM,ANGPT2,RHOB,BRCA1,BTG1,C3,C5AR1,RUNX1,CYP1B1,ENG,ETS1,FGF1,FGF2,FUT1,GATA6,HGF,HK2,HMGB1,IL1A,ITGA5,ITGAX,ITGB1,ITGB8,SMAD1,NINJ1,NODAL,NOS3,PIK3CD,SP1,STAT3,TERT,TGFBR2,TLR3,TWIST1,VEGFA,WNT5A,XBP1,NRP1,SPHK1,SIRT1,PRKD2,ANGPTL3,HIPK2,ANGPT4,MTDH,LRG1,CCBE1
10_Member	GO Biological Processes	GO:0010594	regulation of endothelial cell migration	-13.1116	-11.6185	51/233	94,207,285,350,387,388,498,659,811,1432,1906,1942,1969,2113,2246,2247,2260,2523,2821,3146,3690,4215,4233,4846,4851,5286,5293,5294,5468,5606,5629,5743,5879,6667,6678,6868,7026,7040,7124,7422,7474,8829,11235,23411,25865,29775,51378,116150,147372,406943,406985	ACVRL1,AKT1,ANGPT2,APOH,RHOA,RHOB,ATP5F1A,BMPR2,CALR,MAPK14,EDN1,EFNA1,EPHA2,ETS1,FGF1,FGF2,FGFR1,FUT1,GPI,HMGB1,ITGB3,MAP3K3,MET,NOS3,NOTCH1,PIK3C2A,PIK3CD,PIK3CG,PPARG,MAP2K3,PROX1,PTGS2,RAC1,SP1,SPARC,ADAM17,NR2F2,TGFB1,TNF,VEGFA,WNT5A,NRP1,PDCD10,SIRT1,PRKD2,CARD10,ANGPT4,NUS1,CCBE1,MIR152,MIR200C
10_Member	GO Biological Processes	GO:0010595	positive regulation of endothelial cell migration	-12.9552	-11.4737	37/134	207,388,498,659,811,1432,1906,2113,2246,2247,2260,2523,2821,3146,3690,4215,4233,4846,5286,5293,5294,5606,5629,5743,5879,6667,6678,6868,7040,7422,7474,8829,23411,25865,51378,116150,147372	AKT1,RHOB,ATP5F1A,BMPR2,CALR,MAPK14,EDN1,ETS1,FGF1,FGF2,FGFR1,FUT1,GPI,HMGB1,ITGB3,MAP3K3,MET,NOS3,PIK3C2A,PIK3CD,PIK3CG,MAP2K3,PROX1,PTGS2,RAC1,SP1,SPARC,ADAM17,TGFB1,VEGFA,WNT5A,NRP1,SIRT1,PRKD2,ANGPT4,NUS1,CCBE1
10_Member	GO Biological Processes	GO:0001935	endothelial cell proliferation	-12.7161	-11.2526	46/200	94,207,350,498,650,659,1012,1285,1969,2081,2247,2260,2475,2523,2697,3146,3148,3690,4017,4893,5293,5468,5613,5629,6667,6678,6772,6774,6868,7026,7046,7124,7422,7472,7474,8829,10344,11235,23411,25865,51378,55145,79400,116844,406943,406985	ACVRL1,AKT1,APOH,ATP5F1A,BMP2,BMPR2,CDH13,COL4A3,EPHA2,ERN1,FGF2,FGFR1,MTOR,FUT1,GJA1,HMGB1,HMGB2,ITGB3,LOXL2,NRAS,PIK3CD,PPARG,PRKX,PROX1,SP1,SPARC,STAT1,STAT3,ADAM17,NR2F2,TGFBR1,TNF,VEGFA,WNT2,WNT5A,NRP1,CCL26,PDCD10,SIRT1,PRKD2,ANGPT4,THAP1,NOX5,LRG1,MIR152,MIR200C
10_Member	GO Biological Processes	GO:0043534	blood vessel endothelial cell migration	-9.69161	-8.41484	38/177	94,207,285,387,498,1432,1942,1969,2050,2113,2247,2260,2876,3146,3688,4215,4627,4846,4851,5286,5468,5606,5743,6091,6667,6868,7040,7124,7422,8829,11235,23411,25865,29775,51378,116150,406943,406985	ACVRL1,AKT1,ANGPT2,RHOA,ATP5F1A,MAPK14,EFNA1,EPHA2,EPHB4,ETS1,FGF2,FGFR1,GPX1,HMGB1,ITGB1,MAP3K3,MYH9,NOS3,NOTCH1,PIK3C2A,PPARG,MAP2K3,PTGS2,ROBO1,SP1,ADAM17,TGFB1,TNF,VEGFA,NRP1,PDCD10,SIRT1,PRKD2,CARD10,ANGPT4,NUS1,MIR152,MIR200C
10_Member	GO Biological Processes	GO:0001936	regulation of endothelial cell proliferation	-9.67931	-8.40324	39/185	94,207,350,498,650,659,1012,1285,2247,2260,2475,2523,2697,3146,3148,3690,4893,5293,5468,5629,6667,6678,6772,6774,6868,7026,7046,7124,7422,7472,7474,8829,10344,11235,23411,25865,116844,406943,406985	ACVRL1,AKT1,APOH,ATP5F1A,BMP2,BMPR2,CDH13,COL4A3,FGF2,FGFR1,MTOR,FUT1,GJA1,HMGB1,HMGB2,ITGB3,NRAS,PIK3CD,PPARG,PROX1,SP1,SPARC,STAT1,STAT3,ADAM17,NR2F2,TGFBR1,TNF,VEGFA,WNT2,WNT5A,NRP1,CCL26,PDCD10,SIRT1,PRKD2,LRG1,MIR152,MIR200C
10_Member	GO Biological Processes	GO:0043535	regulation of blood vessel endothelial cell migration	-8.64007	-7.43703	33/152	94,207,285,387,498,1432,1942,1969,2113,2247,2260,3146,4215,4846,4851,5286,5468,5606,5743,6667,6868,7040,7124,7422,8829,11235,23411,25865,29775,51378,116150,406943,406985	ACVRL1,AKT1,ANGPT2,RHOA,ATP5F1A,MAPK14,EFNA1,EPHA2,ETS1,FGF2,FGFR1,HMGB1,MAP3K3,NOS3,NOTCH1,PIK3C2A,PPARG,MAP2K3,PTGS2,SP1,ADAM17,TGFB1,TNF,VEGFA,NRP1,PDCD10,SIRT1,PRKD2,CARD10,ANGPT4,NUS1,MIR152,MIR200C
10_Member	GO Biological Processes	GO:0001938	positive regulation of endothelial cell proliferation	-7.66871	-6.52475	26/111	94,207,650,659,1012,2247,2260,2475,3146,3148,3690,4893,5293,5629,6667,6774,6868,7046,7422,7472,7474,8829,10344,23411,25865,116844	ACVRL1,AKT1,BMP2,BMPR2,CDH13,FGF2,FGFR1,MTOR,HMGB1,HMGB2,ITGB3,NRAS,PIK3CD,PROX1,SP1,STAT3,ADAM17,TGFBR1,VEGFA,WNT2,WNT5A,NRP1,CCL26,SIRT1,PRKD2,LRG1
10_Member	GO Biological Processes	GO:0043536	positive regulation of blood vessel endothelial cell migration	-7.54938	-6.41479	21/77	207,498,1432,2113,2247,2260,3146,4215,4846,5286,5606,5743,6667,6868,7040,7422,8829,23411,25865,51378,116150	AKT1,ATP5F1A,MAPK14,ETS1,FGF2,FGFR1,HMGB1,MAP3K3,NOS3,PIK3C2A,MAP2K3,PTGS2,SP1,ADAM17,TGFB1,VEGFA,NRP1,SIRT1,PRKD2,ANGPT4,NUS1
11_Summary	GO Biological Processes	GO:0046649	lymphocyte activation	-45.021	-41.8354	173/771	196,207,292,387,472,578,581,596,648,678,814,861,864,912,915,920,942,961,974,977,1026,1054,1141,1235,1316,1499,1604,1958,2000,2033,2064,2067,2150,2268,2280,2281,2475,2529,2547,2629,2648,2737,2956,3077,3146,3175,3251,3329,3398,3456,3458,3479,3516,3537,3538,3539,3542,3552,3566,3569,3570,3572,3606,3615,3624,3659,3662,3683,3688,3916,3955,3956,4064,4066,4067,4092,4179,4189,4292,4627,4853,4860,4914,5074…	AHR,AKT1,SLC25A5,RHOA,ATM,BAK1,BAX,BCL2,BMI1,ZFP36L2,CAMK4,RUNX1,RUNX3,CD1D,CD3D,CD4,CD86,CD47,CD79B,CD151,CDKN1A,CEBPG,CHRNB2,CCR6,KLF6,CTNNB1,CD55,EGR1,ELF4,EP300,ERBB2,ERCC1,F2RL1,FGR,FKBP1A,FKBP1B,MTOR,FUT7,XRCC6,GBA,KAT2A,GLI3,MSH6,HFE,HMGB1,ONECUT1,HPRT1,HSPD1,ID2,IFNB1,IFNG,IGF1,RBPJ,IGLC1,IGLC2,IGLC3,IGLC6,IL1A,IL4R,IL6,IL6R,IL6ST,IL18,IMPDH2,INHBA,IRF1,IRF4,ITGAL,ITGB1,LAMP1,LFNG,LGALS1,…
11_Member	GO Biological Processes	GO:0046649	lymphocyte activation	-45.021	-41.8354	173/771	196,207,292,387,472,578,581,596,648,678,814,861,864,912,915,920,942,961,974,977,1026,1054,1141,1235,1316,1499,1604,1958,2000,2033,2064,2067,2150,2268,2280,2281,2475,2529,2547,2629,2648,2737,2956,3077,3146,3175,3251,3329,3398,3456,3458,3479,3516,3537,3538,3539,3542,3552,3566,3569,3570,3572,3606,3615,3624,3659,3662,3683,3688,3916,3955,3956,4064,4066,4067,4092,4179,4189,4292,4627,4853,4860,4914,5074…	AHR,AKT1,SLC25A5,RHOA,ATM,BAK1,BAX,BCL2,BMI1,ZFP36L2,CAMK4,RUNX1,RUNX3,CD1D,CD3D,CD4,CD86,CD47,CD79B,CD151,CDKN1A,CEBPG,CHRNB2,CCR6,KLF6,CTNNB1,CD55,EGR1,ELF4,EP300,ERBB2,ERCC1,F2RL1,FGR,FKBP1A,FKBP1B,MTOR,FUT7,XRCC6,GBA,KAT2A,GLI3,MSH6,HFE,HMGB1,ONECUT1,HPRT1,HSPD1,ID2,IFNB1,IFNG,IGF1,RBPJ,IGLC1,IGLC2,IGLC3,IGLC6,IL1A,IL4R,IL6,IL6R,IL6ST,IL18,IMPDH2,INHBA,IRF1,IRF4,ITGAL,ITGB1,LAMP1,LFNG,LGALS1,…
11_Member	GO Biological Processes	GO:0002521	leukocyte differentiation	-42.3761	-39.2895	138/542	142,292,351,387,472,578,581,596,648,678,760,814,861,864,912,915,920,942,974,1021,1050,1054,1235,1316,1385,1432,1435,1499,1958,1969,2033,2064,2150,2353,2475,2529,2547,2629,2648,2737,3106,3146,3175,3398,3456,3458,3516,3552,3566,3569,3570,3606,3624,3659,3662,3688,3696,3725,3930,3955,3956,3976,4066,4067,4092,4179,4189,4318,4609,4627,4831,4853,4860,4914,5196,5293,5295,5316,5336,5468,5532,5590,5777,589…	PARP1,SLC25A5,APP,RHOA,ATM,BAK1,BAX,BCL2,BMI1,ZFP36L2,CA2,CAMK4,RUNX1,RUNX3,CD1D,CD3D,CD4,CD86,CD79B,CDK6,CEBPA,CEBPG,CCR6,KLF6,CREB1,MAPK14,CSF1,CTNNB1,EGR1,EPHA2,EP300,ERBB2,F2RL1,FOS,MTOR,FUT7,XRCC6,GBA,KAT2A,GLI3,HLA-B,HMGB1,ONECUT1,ID2,IFNB1,IFNG,RBPJ,IL1A,IL4R,IL6,IL6R,IL18,INHBA,IRF1,IRF4,ITGB1,ITGB8,JUN,LBR,LFNG,LGALS1,LIF,LYL1,LYN,SMAD7,CD46,DNAJB9,MMP9,MYC,MYH9,NME2,NOTCH2,PNP,NTRK1,PF4…
11_Member	GO Biological Processes	GO:0030155	regulation of cell adhesion	-42.2642	-39.2035	166/751	27,71,81,94,182,207,285,387,396,445,472,596,648,650,655,708,811,861,864,912,920,942,961,999,1012,1021,1277,1307,1432,1435,1545,1604,1785,1942,1969,2064,2065,2113,2316,2523,2526,2529,2737,2932,3037,3077,3146,3170,3175,3329,3456,3458,3479,3552,3566,3569,3572,3606,3611,3659,3673,3675,3909,3956,3976,4067,4092,4179,4221,4582,4651,4771,4838,4851,4860,5074,5294,5295,5310,5314,5362,5371,5465,5500,5530,55…	ABL2,ACTG1,ACTN4,ACVRL1,JAG1,AKT1,ANGPT2,RHOA,ARHGDIA,ASS1,ATM,BCL2,BMI1,BMP2,BMP7,C1QBP,CALR,RUNX1,RUNX3,CD1D,CD4,CD86,CD47,CDH1,CDH13,CDK6,COL1A1,COL16A1,MAPK14,CSF1,CYP1B1,CD55,DNM2,EFNA1,EPHA2,ERBB2,ERBB3,ETS1,FLNA,FUT1,FUT4,FUT7,GLI3,GSK3B,HAS2,HFE,HMGB1,FOXA2,ONECUT1,HSPD1,IFNB1,IFNG,IGF1,IL1A,IL4R,IL6,IL6ST,IL18,ILK,IRF1,ITGA2,ITGA3,LAMA3,LGALS1,LIF,LYN,SMAD7,CD46,MEN1,MUC1,MYO10,NF2,NODAL…
11_Member	GO Biological Processes	GO:0050865	regulation of cell activation	-35.4982	-32.7799	142/650	196,207,387,472,596,648,678,814,861,864,912,920,942,961,1026,1050,1141,1490,1499,1604,2064,2147,2150,2241,2268,2547,2648,2737,3077,3146,3329,3398,3456,3458,3479,3537,3538,3539,3542,3552,3566,3569,3572,3606,3624,3659,3662,3727,3735,3916,3949,3956,4067,4092,4179,4292,4846,4860,5074,5156,5359,5573,5580,5590,5621,5777,5781,5896,6385,6469,6504,6647,6659,6777,6812,6850,6863,7037,7040,7048,7099,7128,729…	AHR,AKT1,RHOA,ATM,BCL2,BMI1,ZFP36L2,CAMK4,RUNX1,RUNX3,CD1D,CD4,CD86,CD47,CDKN1A,CEBPA,CHRNB2,CCN2,CTNNB1,CD55,ERBB2,F2,F2RL1,FER,FGR,XRCC6,KAT2A,GLI3,HFE,HMGB1,HSPD1,ID2,IFNB1,IFNG,IGF1,IGLC1,IGLC2,IGLC3,IGLC6,IL1A,IL4R,IL6,IL6ST,IL18,INHBA,IRF1,IRF4,JUND,KARS1,LAMP1,LDLR,LGALS1,LYN,SMAD7,CD46,MLH1,NOS3,PNP,PAWR,PDGFRA,PLSCR1,PRKAR1A,PRKCD,PRKCZ,PRNP,PTPN6,PTPN11,RAG1,SDC4,SHH,SLAMF1,SOD1,SOX4,ST…
11_Member	GO Biological Processes	GO:1903131	mononuclear cell differentiation	-32.99	-30.3992	108/426	292,387,472,578,581,596,648,678,814,861,864,912,915,920,942,974,1021,1054,1235,1316,1435,1499,1958,2033,2064,2150,2475,2529,2547,2629,2648,2737,3106,3146,3175,3398,3456,3458,3516,3552,3566,3569,3570,3606,3624,3659,3662,3688,3696,3725,3955,3956,4066,4067,4092,4179,4189,4609,4627,4853,4860,4914,5293,5295,5316,5336,5468,5532,5590,5777,5896,6194,6469,6504,6647,6659,6774,6777,6850,6868,7048,7157,7226,…	SLC25A5,RHOA,ATM,BAK1,BAX,BCL2,BMI1,ZFP36L2,CAMK4,RUNX1,RUNX3,CD1D,CD3D,CD4,CD86,CD79B,CDK6,CEBPG,CCR6,KLF6,CSF1,CTNNB1,EGR1,EP300,ERBB2,F2RL1,MTOR,FUT7,XRCC6,GBA,KAT2A,GLI3,HLA-B,HMGB1,ONECUT1,ID2,IFNB1,IFNG,RBPJ,IL1A,IL4R,IL6,IL6R,IL18,INHBA,IRF1,IRF4,ITGB1,ITGB8,JUN,LFNG,LGALS1,LYL1,LYN,SMAD7,CD46,DNAJB9,MYC,MYH9,NOTCH2,PNP,NTRK1,PIK3CD,PIK3R1,PKNOX1,PLCG2,PPARG,PPP3CB,PRKCZ,PTPN6,RAG1,RPS6,SH…
11_Member	GO Biological Processes	GO:0002694	regulation of leukocyte activation	-32.8534	-30.2698	132/606	196,207,387,472,596,648,678,814,861,864,912,920,942,961,1026,1050,1141,1499,1604,2064,2150,2241,2268,2547,2648,2737,3077,3146,3329,3398,3456,3458,3479,3537,3538,3539,3542,3552,3566,3569,3572,3606,3624,3659,3662,3727,3735,3916,3949,3956,4067,4092,4179,4292,4860,5074,5359,5573,5590,5621,5777,5781,5896,6385,6469,6504,6647,6659,6777,6812,6850,6863,7037,7040,7048,7099,7128,7301,7412,7474,7494,7525,770…	AHR,AKT1,RHOA,ATM,BCL2,BMI1,ZFP36L2,CAMK4,RUNX1,RUNX3,CD1D,CD4,CD86,CD47,CDKN1A,CEBPA,CHRNB2,CTNNB1,CD55,ERBB2,F2RL1,FER,FGR,XRCC6,KAT2A,GLI3,HFE,HMGB1,HSPD1,ID2,IFNB1,IFNG,IGF1,IGLC1,IGLC2,IGLC3,IGLC6,IL1A,IL4R,IL6,IL6ST,IL18,INHBA,IRF1,IRF4,JUND,KARS1,LAMP1,LDLR,LGALS1,LYN,SMAD7,CD46,MLH1,PNP,PAWR,PLSCR1,PRKAR1A,PRKCZ,PRNP,PTPN6,PTPN11,RAG1,SDC4,SHH,SLAMF1,SOD1,SOX4,STAT5B,STXBP1,SYK,TAC1,TFRC,…
11_Member	GO Biological Processes	GO:0030098	lymphocyte differentiation	-29.2261	-26.8511	95/373	292,387,472,578,581,596,648,678,814,861,864,912,915,920,942,974,1054,1235,1316,1499,1958,2033,2064,2475,2529,2547,2629,2648,2737,3146,3175,3398,3456,3458,3516,3552,3566,3569,3570,3606,3624,3659,3662,3688,3955,3956,4066,4092,4179,4189,4853,4860,4914,5293,5295,5316,5336,5532,5590,5777,5896,6194,6469,6504,6647,6659,6774,6777,6850,6868,7048,7157,7301,7412,7494,7528,7704,8546,9474,9935,10758,10892,112…	SLC25A5,RHOA,ATM,BAK1,BAX,BCL2,BMI1,ZFP36L2,CAMK4,RUNX1,RUNX3,CD1D,CD3D,CD4,CD86,CD79B,CEBPG,CCR6,KLF6,CTNNB1,EGR1,EP300,ERBB2,MTOR,FUT7,XRCC6,GBA,KAT2A,GLI3,HMGB1,ONECUT1,ID2,IFNB1,IFNG,RBPJ,IL1A,IL4R,IL6,IL6R,IL18,INHBA,IRF1,IRF4,ITGB1,LFNG,LGALS1,LYL1,SMAD7,CD46,DNAJB9,NOTCH2,PNP,NTRK1,PIK3CD,PIK3R1,PKNOX1,PLCG2,PPP3CB,PRKCZ,PTPN6,RAG1,RPS6,SHH,SLAMF1,SOD1,SOX4,STAT3,STAT5B,SYK,ADAM17,TGFBR2,T…
11_Member	GO Biological Processes	GO:0045785	positive regulation of cell adhesion	-28.6332	-26.3009	103/437	207,387,472,648,655,708,811,861,864,912,920,942,961,1012,1021,1307,1435,1604,1785,2064,2113,2316,2523,2526,2529,2737,2932,3037,3146,3170,3329,3458,3479,3552,3566,3569,3572,3606,3611,3673,3675,3956,3976,4067,4092,4179,4651,4838,4860,5530,5590,5777,5781,5879,5896,6239,6385,6469,6504,6659,6777,6789,6850,7037,7042,7048,7124,7402,7412,7422,7474,7494,7525,7704,8013,8546,8600,8728,8829,8915,9448,9530,10…	AKT1,RHOA,ATM,BMI1,BMP7,C1QBP,CALR,RUNX1,RUNX3,CD1D,CD4,CD86,CD47,CDH13,CDK6,COL16A1,CSF1,CD55,DNM2,ERBB2,ETS1,FLNA,FUT1,FUT4,FUT7,GLI3,GSK3B,HAS2,HMGB1,FOXA2,HSPD1,IFNG,IGF1,IL1A,IL4R,IL6,IL6ST,IL18,ILK,ITGA2,ITGA3,LGALS1,LIF,LYN,SMAD7,CD46,MYO10,NODAL,PNP,PPP3CA,PRKCZ,PTPN6,PTPN11,RAC1,RAG1,RREB1,SDC4,SHH,SLAMF1,SOX4,STAT5B,STK4,SYK,TFRC,TGFB2,TGFBR2,TNF,UTRN,VCAM1,VEGFA,WNT5A,XBP1,YES1,ZBTB16,…
11_Member	GO Biological Processes	GO:0042110	T cell activation	-28.4621	-26.1379	109/484	207,387,581,596,648,678,814,861,864,912,915,920,942,961,977,1235,1499,1604,1958,2000,2064,2150,2280,2281,2475,2529,2629,2648,2737,3077,3146,3329,3456,3458,3479,3552,3566,3569,3570,3572,3606,3659,3662,3683,3955,3956,4067,4092,4179,4627,4860,5074,5293,5294,5316,5530,5532,5573,5590,5621,5777,5781,5896,6194,6385,6469,6504,6647,6659,6774,6777,6850,6868,7037,7048,7157,7412,7494,7525,7704,8379,8546,8600…	AKT1,RHOA,BAX,BCL2,BMI1,ZFP36L2,CAMK4,RUNX1,RUNX3,CD1D,CD3D,CD4,CD86,CD47,CD151,CCR6,CTNNB1,CD55,EGR1,ELF4,ERBB2,F2RL1,FKBP1A,FKBP1B,MTOR,FUT7,GBA,KAT2A,GLI3,HFE,HMGB1,HSPD1,IFNB1,IFNG,IGF1,IL1A,IL4R,IL6,IL6R,IL6ST,IL18,IRF1,IRF4,ITGAL,LFNG,LGALS1,LYN,SMAD7,CD46,MYH9,PNP,PAWR,PIK3CD,PIK3CG,PKNOX1,PPP3CA,PPP3CB,PRKAR1A,PRKCZ,PRNP,PTPN6,PTPN11,RAG1,RPS6,SDC4,SHH,SLAMF1,SOD1,SOX4,STAT3,STAT5B,SYK,AD…
11_Member	GO Biological Processes	GO:0051249	regulation of lymphocyte activation	-27.8328	-25.543	112/515	196,207,387,472,596,648,678,814,861,864,912,920,942,961,1026,1141,1499,1604,2064,2268,2547,2648,2737,3077,3146,3329,3398,3456,3458,3479,3537,3538,3539,3542,3552,3566,3569,3572,3606,3624,3659,3662,3916,3956,4067,4092,4179,4292,4860,5074,5573,5590,5621,5777,5781,5896,6385,6469,6504,6647,6659,6777,6850,6863,7037,7040,7048,7099,7128,7301,7412,7494,7525,7704,8379,8546,8600,8660,8915,9231,10451,10892,1…	AHR,AKT1,RHOA,ATM,BCL2,BMI1,ZFP36L2,CAMK4,RUNX1,RUNX3,CD1D,CD4,CD86,CD47,CDKN1A,CHRNB2,CTNNB1,CD55,ERBB2,FGR,XRCC6,KAT2A,GLI3,HFE,HMGB1,HSPD1,ID2,IFNB1,IFNG,IGF1,IGLC1,IGLC2,IGLC3,IGLC6,IL1A,IL4R,IL6,IL6ST,IL18,INHBA,IRF1,IRF4,LAMP1,LGALS1,LYN,SMAD7,CD46,MLH1,PNP,PAWR,PRKAR1A,PRKCZ,PRNP,PTPN6,PTPN11,RAG1,SDC4,SHH,SLAMF1,SOD1,SOX4,STAT5B,SYK,TAC1,TFRC,TGFB1,TGFBR2,TLR4,TNFAIP3,TYRO3,VCAM1,XBP1,YES…
11_Member	GO Biological Processes	GO:0007159	leukocyte cell-cell adhesion	-26.7031	-24.4553	91/371	207,387,445,648,655,861,864,912,920,942,961,1604,2064,2113,2526,2529,2650,2737,3037,3077,3146,3329,3456,3458,3479,3552,3566,3569,3572,3606,3659,3683,3688,3695,3956,4067,4092,4179,4860,5074,5465,5573,5590,5621,5777,5781,5896,6385,6404,6469,6504,6659,6777,6850,7037,7048,7124,7412,7430,7494,7525,7704,8013,8379,8546,8600,8915,9231,10164,10318,10507,10892,11221,23308,23513,26191,27242,50848,51148,5490…	AKT1,RHOA,ASS1,BMI1,BMP7,RUNX1,RUNX3,CD1D,CD4,CD86,CD47,CD55,ERBB2,ETS1,FUT4,FUT7,GCNT1,GLI3,HAS2,HFE,HMGB1,HSPD1,IFNB1,IFNG,IGF1,IL1A,IL4R,IL6,IL6ST,IL18,IRF1,ITGAL,ITGB1,ITGB7,LGALS1,LYN,SMAD7,CD46,PNP,PAWR,PPARA,PRKAR1A,PRKCZ,PRNP,PTPN6,PTPN11,RAG1,SDC4,SELPLG,SHH,SLAMF1,SOX4,STAT5B,SYK,TFRC,TGFBR2,TNF,VCAM1,EZR,XBP1,YES1,ZBTB16,NR4A3,MAD1L1,AP3B1,TNFSF11,BCL10,DLG5,CHST4,TNIP1,SEMA4D,MALT1,DU…
11_Member	GO Biological Processes	GO:0022407	regulation of cell-cell adhesion	-26.2733	-24.0387	101/450	182,207,387,445,648,650,655,861,864,912,920,942,961,999,1432,1604,2064,2113,2526,2529,2737,3037,3077,3146,3170,3329,3456,3458,3479,3552,3566,3569,3572,3606,3659,3956,4067,4092,4179,4651,4771,4838,4851,4860,5074,5314,5465,5573,5580,5590,5621,5777,5781,5896,6385,6469,6504,6659,6777,6850,7037,7040,7048,7124,7412,7422,7474,7494,7525,7704,8013,8379,8546,8600,8728,8915,9231,9370,10019,10164,10892,11221…	JAG1,AKT1,RHOA,ASS1,BMI1,BMP2,BMP7,RUNX1,RUNX3,CD1D,CD4,CD86,CD47,CDH1,MAPK14,CD55,ERBB2,ETS1,FUT4,FUT7,GLI3,HAS2,HFE,HMGB1,FOXA2,HSPD1,IFNB1,IFNG,IGF1,IL1A,IL4R,IL6,IL6ST,IL18,IRF1,LGALS1,LYN,SMAD7,CD46,MYO10,NF2,NODAL,NOTCH1,PNP,PAWR,PKHD1,PPARA,PRKAR1A,PRKCD,PRKCZ,PRNP,PTPN6,PTPN11,RAG1,SDC4,SHH,SLAMF1,SOX4,STAT5B,SYK,TFRC,TGFB1,TGFBR2,TNF,VCAM1,VEGFA,WNT5A,XBP1,YES1,ZBTB16,NR4A3,MAD1L1,AP3B1,…
11_Member	GO Biological Processes	GO:0050867	positive regulation of cell activation	-23.1662	-21.0923	92/420	207,387,596,648,861,864,912,920,942,961,1026,1050,1141,1490,1604,2150,2268,2547,2737,3146,3329,3458,3479,3537,3538,3539,3542,3552,3566,3569,3572,3606,3727,3735,3916,3956,4067,4179,4292,4860,5590,5777,5781,5896,6469,6504,6659,6777,6812,6850,6863,7037,7040,7048,7099,7412,7474,7494,7525,7704,8013,8546,8600,8660,8723,8915,10333,10451,10666,10892,11027,11221,23308,26191,26228,28834,54106,55183,57178,7…	AKT1,RHOA,BCL2,BMI1,RUNX1,RUNX3,CD1D,CD4,CD86,CD47,CDKN1A,CEBPA,CHRNB2,CCN2,CD55,F2RL1,FGR,XRCC6,GLI3,HMGB1,HSPD1,IFNG,IGF1,IGLC1,IGLC2,IGLC3,IGLC6,IL1A,IL4R,IL6,IL6ST,IL18,JUND,KARS1,LAMP1,LGALS1,LYN,CD46,MLH1,PNP,PRKCZ,PTPN6,PTPN11,RAG1,SHH,SLAMF1,SOX4,STAT5B,STXBP1,SYK,TAC1,TFRC,TGFB1,TGFBR2,TLR4,VCAM1,WNT5A,XBP1,YES1,ZBTB16,NR4A3,AP3B1,TNFSF11,IRS2,SNX4,BCL10,TLR6,VAV3,CD226,MALT1,LILRA2,DUSP…
11_Member	GO Biological Processes	GO:0070661	leukocyte proliferation	-22.7763	-20.7242	78/320	196,472,581,596,648,912,942,977,1026,1141,1191,1435,1499,1604,2000,2064,2150,2281,2629,3146,3251,3329,3456,3479,3552,3569,3572,3606,3615,3659,4064,4067,4179,4860,5074,5294,5532,5573,5580,5594,5621,5777,5813,6194,6355,6385,6469,6504,6777,6850,6863,7037,7048,7099,7128,7157,7412,8379,8600,8660,9231,10451,10892,22806,23308,23495,23513,26191,27242,54106,55716,80762,83737,84868,89780,114609,115650,1492…	AHR,ATM,BAX,BCL2,BMI1,CD1D,CD86,CD151,CDKN1A,CHRNB2,CLU,CSF1,CTNNB1,CD55,ELF4,ERBB2,F2RL1,FKBP1B,GBA,HMGB1,HPRT1,HSPD1,IFNB1,IGF1,IL1A,IL6,IL6ST,IL18,IMPDH2,IRF1,CD180,LYN,CD46,PNP,PAWR,PIK3CG,PPP3CB,PRKAR1A,PRKCD,MAPK1,PRNP,PTPN6,PURA,RPS6,CCL8,SDC4,SHH,SLAMF1,STAT5B,SYK,TAC1,TFRC,TGFBR2,TLR4,TNFAIP3,TP53,VCAM1,MAD1L1,TNFSF11,IRS2,DLG5,VAV3,MALT1,IKZF3,ICOSLG,TNFRSF13B,SCRIB,PTPN22,TNFRSF21,TLR9…
11_Member	GO Biological Processes	GO:0002696	positive regulation of leukocyte activation	-22.2173	-20.19	89/409	207,387,596,648,861,864,912,920,942,961,1026,1050,1141,1604,2150,2268,2547,2737,3146,3329,3458,3479,3537,3538,3539,3542,3552,3566,3569,3572,3606,3727,3735,3916,3956,4067,4179,4292,4860,5590,5777,5781,5896,6469,6504,6659,6777,6812,6850,6863,7037,7040,7048,7099,7412,7474,7494,7525,7704,8013,8546,8600,8660,8723,8915,10333,10451,10666,10892,11221,23308,26191,26228,28834,54106,55183,57178,79155,79576,…	AKT1,RHOA,BCL2,BMI1,RUNX1,RUNX3,CD1D,CD4,CD86,CD47,CDKN1A,CEBPA,CHRNB2,CD55,F2RL1,FGR,XRCC6,GLI3,HMGB1,HSPD1,IFNG,IGF1,IGLC1,IGLC2,IGLC3,IGLC6,IL1A,IL4R,IL6,IL6ST,IL18,JUND,KARS1,LAMP1,LGALS1,LYN,CD46,MLH1,PNP,PRKCZ,PTPN6,PTPN11,RAG1,SHH,SLAMF1,SOX4,STAT5B,STXBP1,SYK,TAC1,TFRC,TGFB1,TGFBR2,TLR4,VCAM1,WNT5A,XBP1,YES1,ZBTB16,NR4A3,AP3B1,TNFSF11,IRS2,SNX4,BCL10,TLR6,VAV3,CD226,MALT1,DUSP10,ICOSLG,PT…
11_Member	GO Biological Processes	GO:1903037	regulation of leukocyte cell-cell adhesion	-21.9975	-19.986	79/336	207,387,445,648,861,864,912,920,942,961,1604,2064,2113,2526,2529,2737,3037,3077,3146,3329,3456,3458,3479,3552,3566,3569,3572,3606,3659,3956,4067,4092,4179,4860,5074,5465,5573,5590,5621,5777,5781,5896,6385,6469,6504,6659,6777,6850,7037,7048,7124,7412,7494,7525,7704,8013,8379,8546,8600,8915,9231,10164,10892,11221,23308,23513,26191,27242,54900,55824,57178,65125,79576,80762,83737,84868,115650,149233,…	AKT1,RHOA,ASS1,BMI1,RUNX1,RUNX3,CD1D,CD4,CD86,CD47,CD55,ERBB2,ETS1,FUT4,FUT7,GLI3,HAS2,HFE,HMGB1,HSPD1,IFNB1,IFNG,IGF1,IL1A,IL4R,IL6,IL6ST,IL18,IRF1,LGALS1,LYN,SMAD7,CD46,PNP,PAWR,PPARA,PRKAR1A,PRKCZ,PRNP,PTPN6,PTPN11,RAG1,SDC4,SHH,SLAMF1,SOX4,STAT5B,SYK,TFRC,TGFBR2,TNF,VCAM1,XBP1,YES1,ZBTB16,NR4A3,MAD1L1,AP3B1,TNFSF11,BCL10,DLG5,CHST4,MALT1,DUSP10,ICOSLG,SCRIB,PTPN22,TNFRSF21,LAX1,PAG1,ZMIZ1,WNK…
11_Member	GO Biological Processes	GO:0032943	mononuclear cell proliferation	-20.628	-18.6878	71/293	196,472,581,596,648,912,942,977,1026,1141,1435,1499,1604,2000,2064,2281,3146,3251,3329,3456,3479,3552,3569,3572,3606,3615,3659,4064,4067,4179,4860,5074,5294,5532,5573,5580,5621,5777,5813,6194,6385,6469,6504,6777,6850,6863,7037,7048,7099,7157,7412,8379,8660,9231,10451,10892,22806,23308,23495,23513,26191,27242,54106,55716,80762,83737,84868,89780,114609,115650,149233	AHR,ATM,BAX,BCL2,BMI1,CD1D,CD86,CD151,CDKN1A,CHRNB2,CSF1,CTNNB1,CD55,ELF4,ERBB2,FKBP1B,HMGB1,HPRT1,HSPD1,IFNB1,IGF1,IL1A,IL6,IL6ST,IL18,IMPDH2,IRF1,CD180,LYN,CD46,PNP,PAWR,PIK3CG,PPP3CB,PRKAR1A,PRKCD,PRNP,PTPN6,PURA,RPS6,SDC4,SHH,SLAMF1,STAT5B,SYK,TAC1,TFRC,TGFBR2,TLR4,TP53,VCAM1,MAD1L1,IRS2,DLG5,VAV3,MALT1,IKZF3,ICOSLG,TNFRSF13B,SCRIB,PTPN22,TNFRSF21,TLR9,LMBR1L,NDFIP1,ITCH,HAVCR2,WNT3A,TIRAP,TN…
11_Member	GO Biological Processes	GO:0046651	lymphocyte proliferation	-20.2439	-18.3183	70/290	196,472,581,596,648,912,942,977,1026,1141,1499,1604,2000,2064,2281,3146,3251,3329,3456,3479,3552,3569,3572,3606,3615,3659,4064,4067,4179,4860,5074,5294,5532,5573,5580,5621,5777,5813,6194,6385,6469,6504,6777,6850,6863,7037,7048,7099,7157,7412,8379,8660,9231,10451,10892,22806,23308,23495,23513,26191,27242,54106,55716,80762,83737,84868,89780,114609,115650,149233	AHR,ATM,BAX,BCL2,BMI1,CD1D,CD86,CD151,CDKN1A,CHRNB2,CTNNB1,CD55,ELF4,ERBB2,FKBP1B,HMGB1,HPRT1,HSPD1,IFNB1,IGF1,IL1A,IL6,IL6ST,IL18,IMPDH2,IRF1,CD180,LYN,CD46,PNP,PAWR,PIK3CG,PPP3CB,PRKAR1A,PRKCD,PRNP,PTPN6,PURA,RPS6,SDC4,SHH,SLAMF1,STAT5B,SYK,TAC1,TFRC,TGFBR2,TLR4,TP53,VCAM1,MAD1L1,IRS2,DLG5,VAV3,MALT1,IKZF3,ICOSLG,TNFRSF13B,SCRIB,PTPN22,TNFRSF21,TLR9,LMBR1L,NDFIP1,ITCH,HAVCR2,WNT3A,TIRAP,TNFRSF1…
11_Member	GO Biological Processes	GO:0050863	regulation of T cell activation	-19.9801	-18.0731	75/330	207,387,648,814,861,864,912,920,942,961,1499,1604,2064,2648,2737,3077,3146,3329,3456,3458,3479,3552,3566,3569,3572,3606,3659,3662,3956,4067,4092,4179,4860,5074,5573,5590,5621,5777,5781,5896,6385,6469,6504,6647,6659,6777,6850,7037,7048,7412,7494,7525,7704,8379,8546,8600,8915,9231,10892,11221,23308,23513,26191,27166,27240,27242,54900,55824,57178,79576,80762,83737,84868,115650,149233	AKT1,RHOA,BMI1,CAMK4,RUNX1,RUNX3,CD1D,CD4,CD86,CD47,CTNNB1,CD55,ERBB2,KAT2A,GLI3,HFE,HMGB1,HSPD1,IFNB1,IFNG,IGF1,IL1A,IL4R,IL6,IL6ST,IL18,IRF1,IRF4,LGALS1,LYN,SMAD7,CD46,PNP,PAWR,PRKAR1A,PRKCZ,PRNP,PTPN6,PTPN11,RAG1,SDC4,SHH,SLAMF1,SOD1,SOX4,STAT5B,SYK,TFRC,TGFBR2,VCAM1,XBP1,YES1,ZBTB16,MAD1L1,AP3B1,TNFSF11,BCL10,DLG5,MALT1,DUSP10,ICOSLG,SCRIB,PTPN22,PRELID1,SIT1,TNFRSF21,LAX1,PAG1,ZMIZ1,NKAP,NDF…
11_Member	GO Biological Processes	GO:0030217	T cell differentiation	-19.4123	-17.5377	64/256	387,596,648,678,814,861,864,912,915,920,942,1235,1499,1958,2064,2475,2529,2629,2648,2737,3146,3456,3458,3552,3566,3569,3570,3606,3659,3662,3955,4092,4179,4860,5293,5316,5532,5590,5896,6194,6469,6647,6659,6774,6777,6850,6868,7048,7157,7494,7704,8546,9474,9935,10758,10892,11221,26191,27166,55716,57178,64919,79576,149233	RHOA,BCL2,BMI1,ZFP36L2,CAMK4,RUNX1,RUNX3,CD1D,CD3D,CD4,CD86,CCR6,CTNNB1,EGR1,ERBB2,MTOR,FUT7,GBA,KAT2A,GLI3,HMGB1,IFNB1,IFNG,IL1A,IL4R,IL6,IL6R,IL18,IRF1,IRF4,LFNG,SMAD7,CD46,PNP,PIK3CD,PKNOX1,PPP3CB,PRKCZ,RAG1,RPS6,SHH,SOD1,SOX4,STAT3,STAT5B,SYK,ADAM17,TGFBR2,TP53,XBP1,ZBTB16,AP3B1,ATG5,MAFB,TRAF3IP2,MALT1,DUSP10,PTPN22,PRELID1,LMBR1L,ZMIZ1,BCL11B,NKAP,IL23R
11_Member	GO Biological Processes	GO:0022409	positive regulation of cell-cell adhesion	-18.8319	-16.9873	67/284	207,387,648,655,861,864,912,920,942,961,1604,2113,2526,2529,2737,3037,3146,3170,3329,3458,3479,3552,3566,3569,3572,3606,3956,4067,4092,4179,4651,4838,4860,5590,5777,5781,5896,6469,6504,6659,6777,6850,7037,7048,7124,7412,7474,7494,7525,7704,8013,8546,8600,8728,8915,10164,10892,11221,23308,26191,50848,57178,79576,84868,89780,115650,149233	AKT1,RHOA,BMI1,BMP7,RUNX1,RUNX3,CD1D,CD4,CD86,CD47,CD55,ETS1,FUT4,FUT7,GLI3,HAS2,HMGB1,FOXA2,HSPD1,IFNG,IGF1,IL1A,IL4R,IL6,IL6ST,IL18,LGALS1,LYN,SMAD7,CD46,MYO10,NODAL,PNP,PRKCZ,PTPN6,PTPN11,RAG1,SHH,SLAMF1,SOX4,STAT5B,SYK,TFRC,TGFBR2,TNF,VCAM1,WNT5A,XBP1,YES1,ZBTB16,NR4A3,AP3B1,TNFSF11,ADAM19,BCL10,CHST4,MALT1,DUSP10,ICOSLG,PTPN22,F11R,ZMIZ1,NKAP,HAVCR2,WNT3A,TNFRSF13C,IL23R
11_Member	GO Biological Processes	GO:1903039	positive regulation of leukocyte cell-cell adhesion	-17.0023	-15.2761	58/239	207,387,648,861,864,912,920,942,961,1604,2113,2526,2529,2737,3037,3146,3329,3458,3479,3552,3566,3569,3572,3606,3956,4067,4179,4860,5590,5777,5781,5896,6469,6504,6659,6777,6850,7037,7048,7124,7412,7494,7525,7704,8013,8546,8600,8915,10164,10892,11221,23308,26191,57178,79576,84868,115650,149233	AKT1,RHOA,BMI1,RUNX1,RUNX3,CD1D,CD4,CD86,CD47,CD55,ETS1,FUT4,FUT7,GLI3,HAS2,HMGB1,HSPD1,IFNG,IGF1,IL1A,IL4R,IL6,IL6ST,IL18,LGALS1,LYN,CD46,PNP,PRKCZ,PTPN6,PTPN11,RAG1,SHH,SLAMF1,SOX4,STAT5B,SYK,TFRC,TGFBR2,TNF,VCAM1,XBP1,YES1,ZBTB16,NR4A3,AP3B1,TNFSF11,BCL10,CHST4,MALT1,DUSP10,ICOSLG,PTPN22,ZMIZ1,NKAP,HAVCR2,TNFRSF13C,IL23R
11_Member	GO Biological Processes	GO:0051251	positive regulation of lymphocyte activation	-16.9572	-15.237	74/362	207,387,596,648,861,864,912,920,942,961,1026,1141,1604,2547,2737,3146,3329,3458,3479,3537,3538,3539,3542,3552,3566,3569,3572,3606,3916,3956,4067,4179,4292,4860,5590,5777,5781,5896,6469,6504,6659,6777,6850,6863,7037,7040,7048,7099,7412,7494,7525,7704,8546,8600,8660,8915,10451,10892,11221,23308,26191,28834,54106,55183,57178,79155,79576,84868,89780,114609,115650,149233,388552,100423062	AKT1,RHOA,BCL2,BMI1,RUNX1,RUNX3,CD1D,CD4,CD86,CD47,CDKN1A,CHRNB2,CD55,XRCC6,GLI3,HMGB1,HSPD1,IFNG,IGF1,IGLC1,IGLC2,IGLC3,IGLC6,IL1A,IL4R,IL6,IL6ST,IL18,LAMP1,LGALS1,LYN,CD46,MLH1,PNP,PRKCZ,PTPN6,PTPN11,RAG1,SHH,SLAMF1,SOX4,STAT5B,SYK,TAC1,TFRC,TGFB1,TGFBR2,TLR4,VCAM1,XBP1,YES1,ZBTB16,AP3B1,TNFSF11,IRS2,BCL10,VAV3,MALT1,DUSP10,ICOSLG,PTPN22,IGLC7,TLR9,RIF1,ZMIZ1,TNIP2,NKAP,HAVCR2,WNT3A,TIRAP,TNFRS…
11_Member	GO Biological Processes	GO:0070663	regulation of leukocyte proliferation	-15.7428	-14.1037	57/246	196,472,596,648,912,942,1026,1141,1435,1499,1604,2064,3146,3479,3552,3569,3572,3606,3659,4067,4179,4860,5074,5573,5594,5621,5777,6355,6385,6469,6504,6777,6850,6863,7037,7048,7099,7128,7412,8379,8660,9231,10451,22806,23308,23495,23513,26191,27242,54106,80762,83737,84868,89780,114609,115650,149233	AHR,ATM,BCL2,BMI1,CD1D,CD86,CDKN1A,CHRNB2,CSF1,CTNNB1,CD55,ERBB2,HMGB1,IGF1,IL1A,IL6,IL6ST,IL18,IRF1,LYN,CD46,PNP,PAWR,PRKAR1A,MAPK1,PRNP,PTPN6,CCL8,SDC4,SHH,SLAMF1,STAT5B,SYK,TAC1,TFRC,TGFBR2,TLR4,TNFAIP3,VCAM1,MAD1L1,IRS2,DLG5,VAV3,IKZF3,ICOSLG,TNFRSF13B,SCRIB,PTPN22,TNFRSF21,TLR9,NDFIP1,ITCH,HAVCR2,WNT3A,TIRAP,TNFRSF13C,IL23R
11_Member	GO Biological Processes	GO:0032944	regulation of mononuclear cell proliferation	-15.3868	-13.7678	54/228	196,472,596,648,912,942,1026,1141,1435,1499,1604,2064,3146,3479,3552,3569,3572,3606,3659,4067,4179,4860,5074,5573,5621,5777,6385,6469,6504,6777,6850,6863,7037,7048,7099,7412,8379,8660,9231,10451,22806,23308,23495,23513,26191,27242,54106,80762,83737,84868,89780,114609,115650,149233	AHR,ATM,BCL2,BMI1,CD1D,CD86,CDKN1A,CHRNB2,CSF1,CTNNB1,CD55,ERBB2,HMGB1,IGF1,IL1A,IL6,IL6ST,IL18,IRF1,LYN,CD46,PNP,PAWR,PRKAR1A,PRNP,PTPN6,SDC4,SHH,SLAMF1,STAT5B,SYK,TAC1,TFRC,TGFBR2,TLR4,VCAM1,MAD1L1,IRS2,DLG5,VAV3,IKZF3,ICOSLG,TNFRSF13B,SCRIB,PTPN22,TNFRSF21,TLR9,NDFIP1,ITCH,HAVCR2,WNT3A,TIRAP,TNFRSF13C,IL23R
11_Member	GO Biological Processes	GO:0050670	regulation of lymphocyte proliferation	-14.9212	-13.3311	53/226	196,472,596,648,912,942,1026,1141,1499,1604,2064,3146,3479,3552,3569,3572,3606,3659,4067,4179,4860,5074,5573,5621,5777,6385,6469,6504,6777,6850,6863,7037,7048,7099,7412,8379,8660,9231,10451,22806,23308,23495,23513,26191,27242,54106,80762,83737,84868,89780,114609,115650,149233	AHR,ATM,BCL2,BMI1,CD1D,CD86,CDKN1A,CHRNB2,CTNNB1,CD55,ERBB2,HMGB1,IGF1,IL1A,IL6,IL6ST,IL18,IRF1,LYN,CD46,PNP,PAWR,PRKAR1A,PRNP,PTPN6,SDC4,SHH,SLAMF1,STAT5B,SYK,TAC1,TFRC,TGFBR2,TLR4,VCAM1,MAD1L1,IRS2,DLG5,VAV3,IKZF3,ICOSLG,TNFRSF13B,SCRIB,PTPN22,TNFRSF21,TLR9,NDFIP1,ITCH,HAVCR2,WNT3A,TIRAP,TNFRSF13C,IL23R
11_Member	GO Biological Processes	GO:0050870	positive regulation of T cell activation	-14.5125	-12.9488	51/216	207,387,648,861,864,912,920,942,961,1604,2737,3146,3329,3458,3479,3552,3566,3569,3572,3606,3956,4067,4179,4860,5590,5777,5781,5896,6469,6504,6659,6777,6850,7037,7048,7412,7494,7525,7704,8546,8600,8915,10892,11221,23308,26191,57178,79576,84868,115650,149233	AKT1,RHOA,BMI1,RUNX1,RUNX3,CD1D,CD4,CD86,CD47,CD55,GLI3,HMGB1,HSPD1,IFNG,IGF1,IL1A,IL4R,IL6,IL6ST,IL18,LGALS1,LYN,CD46,PNP,PRKCZ,PTPN6,PTPN11,RAG1,SHH,SLAMF1,SOX4,STAT5B,SYK,TFRC,TGFBR2,VCAM1,XBP1,YES1,ZBTB16,AP3B1,TNFSF11,BCL10,MALT1,DUSP10,ICOSLG,PTPN22,ZMIZ1,NKAP,HAVCR2,TNFRSF13C,IL23R
11_Member	GO Biological Processes	GO:0042098	T cell proliferation	-13.9026	-12.3663	48/201	581,648,912,942,977,1499,1604,2000,2064,2281,3146,3479,3552,3569,3572,3606,3659,4179,4860,5074,5294,5532,5573,5621,5777,6194,6385,6469,6504,6777,6850,7037,7048,7157,7412,8379,9231,10892,23308,23513,26191,27242,55716,80762,83737,84868,115650,149233	BAX,BMI1,CD1D,CD86,CD151,CTNNB1,CD55,ELF4,ERBB2,FKBP1B,HMGB1,IGF1,IL1A,IL6,IL6ST,IL18,IRF1,CD46,PNP,PAWR,PIK3CG,PPP3CB,PRKAR1A,PRNP,PTPN6,RPS6,SDC4,SHH,SLAMF1,STAT5B,SYK,TFRC,TGFBR2,TP53,VCAM1,MAD1L1,DLG5,MALT1,ICOSLG,SCRIB,PTPN22,TNFRSF21,LMBR1L,NDFIP1,ITCH,HAVCR2,TNFRSF13C,IL23R
11_Member	GO Biological Processes	GO:0045619	regulation of lymphocyte differentiation	-13.0818	-11.5899	43/174	387,678,814,861,864,942,2064,2547,2648,2737,3146,3398,3456,3458,3566,3606,3624,3659,3662,4092,4179,4860,5590,5777,5896,6469,6647,6659,6777,6850,7048,7494,7704,8546,10892,11221,22806,27166,54106,57178,79576,80762,149233	RHOA,ZFP36L2,CAMK4,RUNX1,RUNX3,CD86,ERBB2,XRCC6,KAT2A,GLI3,HMGB1,ID2,IFNB1,IFNG,IL4R,IL18,INHBA,IRF1,IRF4,SMAD7,CD46,PNP,PRKCZ,PTPN6,RAG1,SHH,SOD1,SOX4,STAT5B,SYK,TGFBR2,XBP1,ZBTB16,AP3B1,MALT1,DUSP10,IKZF3,PRELID1,TLR9,ZMIZ1,NKAP,NDFIP1,IL23R
11_Member	GO Biological Processes	GO:0070665	positive regulation of leukocyte proliferation	-11.3304	-9.94824	37/150	596,648,912,942,1026,1141,1435,1604,3146,3479,3552,3569,3572,3606,4067,4179,4860,5594,6469,6504,6777,6850,6863,7037,7048,7099,7412,8660,10451,23308,26191,54106,84868,89780,114609,115650,149233	BCL2,BMI1,CD1D,CD86,CDKN1A,CHRNB2,CSF1,CD55,HMGB1,IGF1,IL1A,IL6,IL6ST,IL18,LYN,CD46,PNP,MAPK1,SHH,SLAMF1,STAT5B,SYK,TAC1,TFRC,TGFBR2,TLR4,VCAM1,IRS2,VAV3,ICOSLG,PTPN22,TLR9,HAVCR2,WNT3A,TIRAP,TNFRSF13C,IL23R
11_Member	GO Biological Processes	GO:0032946	positive regulation of mononuclear cell proliferation	-11.1276	-9.75936	35/138	596,648,912,942,1026,1141,1435,1604,3146,3479,3552,3569,3572,3606,4179,4860,6469,6504,6777,6850,6863,7037,7048,7099,7412,8660,10451,23308,26191,54106,84868,89780,114609,115650,149233	BCL2,BMI1,CD1D,CD86,CDKN1A,CHRNB2,CSF1,CD55,HMGB1,IGF1,IL1A,IL6,IL6ST,IL18,CD46,PNP,SHH,SLAMF1,STAT5B,SYK,TAC1,TFRC,TGFBR2,TLR4,VCAM1,IRS2,VAV3,ICOSLG,PTPN22,TLR9,HAVCR2,WNT3A,TIRAP,TNFRSF13C,IL23R
11_Member	GO Biological Processes	GO:0050671	positive regulation of lymphocyte proliferation	-10.5483	-9.21472	34/137	596,648,912,942,1026,1141,1604,3146,3479,3552,3569,3572,3606,4179,4860,6469,6504,6777,6850,6863,7037,7048,7099,7412,8660,10451,23308,26191,54106,84868,89780,114609,115650,149233	BCL2,BMI1,CD1D,CD86,CDKN1A,CHRNB2,CD55,HMGB1,IGF1,IL1A,IL6,IL6ST,IL18,CD46,PNP,SHH,SLAMF1,STAT5B,SYK,TAC1,TFRC,TGFBR2,TLR4,VCAM1,IRS2,VAV3,ICOSLG,PTPN22,TLR9,HAVCR2,WNT3A,TIRAP,TNFRSF13C,IL23R
11_Member	GO Biological Processes	GO:0045580	regulation of T cell differentiation	-10.3813	-9.05503	35/146	387,814,861,864,942,2064,2648,2737,3146,3456,3458,3566,3606,3659,3662,4092,4179,4860,5590,5896,6469,6647,6659,6777,6850,7048,7494,7704,8546,10892,11221,27166,57178,79576,149233	RHOA,CAMK4,RUNX1,RUNX3,CD86,ERBB2,KAT2A,GLI3,HMGB1,IFNB1,IFNG,IL4R,IL18,IRF1,IRF4,SMAD7,CD46,PNP,PRKCZ,RAG1,SHH,SOD1,SOX4,STAT5B,SYK,TGFBR2,XBP1,ZBTB16,AP3B1,MALT1,DUSP10,PRELID1,ZMIZ1,NKAP,IL23R
11_Member	GO Biological Processes	GO:0042129	regulation of T cell proliferation	-10.0773	-8.77708	38/172	648,912,942,1499,1604,2064,3146,3479,3552,3569,3572,3606,3659,4179,4860,5074,5573,5621,5777,6385,6469,6504,6777,6850,7037,7048,7412,8379,9231,23308,23513,26191,27242,80762,83737,84868,115650,149233	BMI1,CD1D,CD86,CTNNB1,CD55,ERBB2,HMGB1,IGF1,IL1A,IL6,IL6ST,IL18,IRF1,CD46,PNP,PAWR,PRKAR1A,PRNP,PTPN6,SDC4,SHH,SLAMF1,STAT5B,SYK,TFRC,TGFBR2,VCAM1,MAD1L1,DLG5,ICOSLG,SCRIB,PTPN22,TNFRSF21,NDFIP1,ITCH,HAVCR2,TNFRSF13C,IL23R
11_Member	GO Biological Processes	GO:0046632	alpha-beta T cell differentiation	-9.67434	-8.39864	29/111	387,596,861,864,942,2475,2529,2737,3146,3458,3566,3569,3570,3606,3659,3662,4092,4860,5590,6469,6774,6850,7048,7704,8546,10892,64919,79576,149233	RHOA,BCL2,RUNX1,RUNX3,CD86,MTOR,FUT7,GLI3,HMGB1,IFNG,IL4R,IL6,IL6R,IL18,IRF1,IRF4,SMAD7,PNP,PRKCZ,SHH,STAT3,SYK,TGFBR2,ZBTB16,AP3B1,MALT1,BCL11B,NKAP,IL23R
11_Member	GO Biological Processes	GO:0046631	alpha-beta T cell activation	-9.00481	-7.77536	34/155	387,596,861,864,942,1604,2000,2475,2529,2737,3077,3146,3458,3566,3569,3570,3606,3659,3662,4092,4860,5590,6469,6774,6850,7048,7704,8546,10892,26191,64919,79576,83737,149233	RHOA,BCL2,RUNX1,RUNX3,CD86,CD55,ELF4,MTOR,FUT7,GLI3,HFE,HMGB1,IFNG,IL4R,IL6,IL6R,IL18,IRF1,IRF4,SMAD7,PNP,PRKCZ,SHH,STAT3,SYK,TGFBR2,ZBTB16,AP3B1,MALT1,PTPN22,BCL11B,NKAP,ITCH,IL23R
11_Member	GO Biological Processes	GO:0045582	positive regulation of T cell differentiation	-8.93134	-7.70698	25/91	387,861,864,942,2737,3458,3566,3606,4179,4860,5590,5896,6469,6659,6777,6850,7048,7494,7704,8546,10892,11221,57178,79576,149233	RHOA,RUNX1,RUNX3,CD86,GLI3,IFNG,IL4R,IL18,CD46,PNP,PRKCZ,RAG1,SHH,SOX4,STAT5B,SYK,TGFBR2,XBP1,ZBTB16,AP3B1,MALT1,DUSP10,ZMIZ1,NKAP,IL23R
11_Member	GO Biological Processes	GO:0046638	positive regulation of alpha-beta T cell differentiation	-8.68686	-7.48079	18/50	387,861,864,942,2737,3458,3566,3606,4860,5590,6469,6850,7048,7704,8546,10892,79576,149233	RHOA,RUNX1,RUNX3,CD86,GLI3,IFNG,IL4R,IL18,PNP,PRKCZ,SHH,SYK,TGFBR2,ZBTB16,AP3B1,MALT1,NKAP,IL23R
11_Member	GO Biological Processes	GO:0046637	regulation of alpha-beta T cell differentiation	-8.61918	-7.41884	21/68	387,861,864,942,2737,3146,3458,3566,3606,3662,4092,4860,5590,6469,6850,7048,7704,8546,10892,79576,149233	RHOA,RUNX1,RUNX3,CD86,GLI3,HMGB1,IFNG,IL4R,IL18,IRF4,SMAD7,PNP,PRKCZ,SHH,SYK,TGFBR2,ZBTB16,AP3B1,MALT1,NKAP,IL23R
11_Member	GO Biological Processes	GO:0045621	positive regulation of lymphocyte differentiation	-8.30402	-7.11927	26/104	387,861,864,942,2547,2737,3458,3566,3606,4179,4860,5590,5896,6469,6659,6777,6850,7048,7494,7704,8546,10892,11221,57178,79576,149233	RHOA,RUNX1,RUNX3,CD86,XRCC6,GLI3,IFNG,IL4R,IL18,CD46,PNP,PRKCZ,RAG1,SHH,SOX4,STAT5B,SYK,TGFBR2,XBP1,ZBTB16,AP3B1,MALT1,DUSP10,ZMIZ1,NKAP,IL23R
11_Member	GO Biological Processes	GO:0046634	regulation of alpha-beta T cell activation	-8.30402	-7.11927	26/104	387,861,864,942,1604,2737,3077,3146,3458,3566,3606,3659,3662,4092,4860,5590,6469,6850,7048,7704,8546,10892,26191,79576,83737,149233	RHOA,RUNX1,RUNX3,CD86,CD55,GLI3,HFE,HMGB1,IFNG,IL4R,IL18,IRF1,IRF4,SMAD7,PNP,PRKCZ,SHH,SYK,TGFBR2,ZBTB16,AP3B1,MALT1,PTPN22,NKAP,ITCH,IL23R
11_Member	GO Biological Processes	GO:0046635	positive regulation of alpha-beta T cell activation	-7.95591	-6.79285	20/67	387,861,864,942,1604,2737,3458,3566,3606,4860,5590,6469,6850,7048,7704,8546,10892,26191,79576,149233	RHOA,RUNX1,RUNX3,CD86,CD55,GLI3,IFNG,IL4R,IL18,PNP,PRKCZ,SHH,SYK,TGFBR2,ZBTB16,AP3B1,MALT1,PTPN22,NKAP,IL23R
11_Member	GO Biological Processes	GO:0042102	positive regulation of T cell proliferation	-7.25899	-6.14624	24/101	648,912,942,1604,3146,3479,3552,3569,3572,3606,4179,4860,6469,6504,6777,6850,7037,7048,7412,23308,26191,84868,115650,149233	BMI1,CD1D,CD86,CD55,HMGB1,IGF1,IL1A,IL6,IL6ST,IL18,CD46,PNP,SHH,SLAMF1,STAT5B,SYK,TFRC,TGFBR2,VCAM1,ICOSLG,PTPN22,HAVCR2,TNFRSF13C,IL23R
12_Summary	WikiPathways	WP3888	VEGFA-VEGFR2 signaling pathway	-44.7047	-41.5471	126/439	52,71,182,207,332,382,387,409,596,650,811,867,1175,1192,1200,1385,1432,1490,1499,1827,1847,1958,1969,1977,2022,2058,2081,2113,2309,2475,2523,2697,2876,2885,2889,2926,2932,3146,3265,3303,3320,3688,3690,3725,3939,3998,4189,4193,4217,4627,4641,4646,4846,4860,5226,5230,5295,5530,5562,5563,5580,5590,5594,5604,5606,5710,5743,5757,5770,5777,5781,5867,5868,5879,5908,6142,6154,6181,6194,6301,6386,6416,641…	ACP1,ACTG1,JAG1,AKT1,BIRC5,ARF6,RHOA,ARRB2,BCL2,BMP2,CALR,CBL,AP2S1,CLIC1,TPP1,CREB1,MAPK14,CCN2,CTNNB1,RCAN1,DUSP5,EGR1,EPHA2,EIF4E,ENG,EPRS1,ERN1,ETS1,FOXO3,MTOR,FUT1,GJA1,GPX1,GRB2,RAPGEF1,GRSF1,GSK3B,HMGB1,HRAS,HSPA1A,HSP90AA1,ITGB1,ITGB3,JUN,LDHA,LMAN1,DNAJB9,MDM2,MAP3K5,MYH9,MYO1C,MYO6,NOS3,PNP,PGD,PGK1,PIK3R1,PPP3CA,PRKAA1,PRKAA2,PRKCD,PRKCZ,MAPK1,MAP2K1,MAP2K3,PSMD4,PTGS2,PTMA,PTPN1,PTPN6…
12_Member	WikiPathways	WP3888	VEGFA-VEGFR2 signaling pathway	-44.7047	-41.5471	126/439	52,71,182,207,332,382,387,409,596,650,811,867,1175,1192,1200,1385,1432,1490,1499,1827,1847,1958,1969,1977,2022,2058,2081,2113,2309,2475,2523,2697,2876,2885,2889,2926,2932,3146,3265,3303,3320,3688,3690,3725,3939,3998,4189,4193,4217,4627,4641,4646,4846,4860,5226,5230,5295,5530,5562,5563,5580,5590,5594,5604,5606,5710,5743,5757,5770,5777,5781,5867,5868,5879,5908,6142,6154,6181,6194,6301,6386,6416,641…	ACP1,ACTG1,JAG1,AKT1,BIRC5,ARF6,RHOA,ARRB2,BCL2,BMP2,CALR,CBL,AP2S1,CLIC1,TPP1,CREB1,MAPK14,CCN2,CTNNB1,RCAN1,DUSP5,EGR1,EPHA2,EIF4E,ENG,EPRS1,ERN1,ETS1,FOXO3,MTOR,FUT1,GJA1,GPX1,GRB2,RAPGEF1,GRSF1,GSK3B,HMGB1,HRAS,HSPA1A,HSP90AA1,ITGB1,ITGB3,JUN,LDHA,LMAN1,DNAJB9,MDM2,MAP3K5,MYH9,MYO1C,MYO6,NOS3,PNP,PGD,PGK1,PIK3R1,PPP3CA,PRKAA1,PRKAA2,PRKCD,PRKCZ,MAPK1,MAP2K1,MAP2K3,PSMD4,PTGS2,PTMA,PTPN1,PTPN6…
13_Summary	Reactome Gene Sets	R-HSA-9006934	Signaling by Receptor Tyrosine Kinases	-42.3724	-39.2895	135/521	60,71,116,207,382,387,528,581,673,805,808,867,1020,1175,1211,1277,1278,1282,1285,1289,1298,1385,1432,1499,1785,1846,1848,1956,1958,2033,2064,2065,2069,2099,2241,2246,2247,2254,2260,2353,2475,2885,2889,3082,3265,3320,3398,3399,3479,3480,3673,3675,3688,3690,3708,3727,3845,3909,4066,4067,4209,4233,4318,4486,4609,4846,4893,4914,5156,5241,5295,5327,5434,5435,5441,5528,5580,5590,5594,5604,5725,5770,577…	ACTB,ACTG1,ADCYAP1,AKT1,ARF6,RHOA,ATP6V1C1,BAX,BRAF,CALM2,CALM3,CBL,CDK5,AP2S1,CLTA,COL1A1,COL1A2,COL4A1,COL4A3,COL5A1,COL9A2,CREB1,MAPK14,CTNNB1,DNM2,DUSP4,DUSP6,EGFR,EGR1,EP300,ERBB2,ERBB3,EREG,ESR1,FER,FGF1,FGF2,FGF9,FGFR1,FOS,MTOR,GRB2,RAPGEF1,HGF,HRAS,HSP90AA1,ID2,ID3,IGF1,IGF1R,ITGA2,ITGA3,ITGB1,ITGB3,ITPR1,JUND,KRAS,LAMA3,LYL1,LYN,MEF2D,MET,MMP9,MST1R,MYC,NOS3,NRAS,NTRK1,PDGFRA,PGR,PIK3R1,…
13_Member	Reactome Gene Sets	R-HSA-9006934	Signaling by Receptor Tyrosine Kinases	-42.3724	-39.2895	135/521	60,71,116,207,382,387,528,581,673,805,808,867,1020,1175,1211,1277,1278,1282,1285,1289,1298,1385,1432,1499,1785,1846,1848,1956,1958,2033,2064,2065,2069,2099,2241,2246,2247,2254,2260,2353,2475,2885,2889,3082,3265,3320,3398,3399,3479,3480,3673,3675,3688,3690,3708,3727,3845,3909,4066,4067,4209,4233,4318,4486,4609,4846,4893,4914,5156,5241,5295,5327,5434,5435,5441,5528,5580,5590,5594,5604,5725,5770,577…	ACTB,ACTG1,ADCYAP1,AKT1,ARF6,RHOA,ATP6V1C1,BAX,BRAF,CALM2,CALM3,CBL,CDK5,AP2S1,CLTA,COL1A1,COL1A2,COL4A1,COL4A3,COL5A1,COL9A2,CREB1,MAPK14,CTNNB1,DNM2,DUSP4,DUSP6,EGFR,EGR1,EP300,ERBB2,ERBB3,EREG,ESR1,FER,FGF1,FGF2,FGF9,FGFR1,FOS,MTOR,GRB2,RAPGEF1,HGF,HRAS,HSP90AA1,ID2,ID3,IGF1,IGF1R,ITGA2,ITGA3,ITGB1,ITGB3,ITPR1,JUND,KRAS,LAMA3,LYL1,LYN,MEF2D,MET,MMP9,MST1R,MYC,NOS3,NRAS,NTRK1,PDGFRA,PGR,PIK3R1,…
13_Member	Reactome Gene Sets	R-HSA-187037	Signaling by NTRK1 (TRKA)	-18.7388	-16.9009	41/115	116,387,673,1020,1175,1211,1385,1432,1785,1846,1848,1958,2033,2353,2885,2889,3265,3398,3399,3727,3845,4066,4209,4893,4914,5295,5528,5594,5604,5898,5978,6197,6236,6464,6774,7529,8660,8851,9252,10221,23237	ADCYAP1,RHOA,BRAF,CDK5,AP2S1,CLTA,CREB1,MAPK14,DNM2,DUSP4,DUSP6,EGR1,EP300,FOS,GRB2,RAPGEF1,HRAS,ID2,ID3,JUND,KRAS,LYL1,MEF2D,NRAS,NTRK1,PIK3R1,PPP2R5D,MAPK1,MAP2K1,RALA,REST,RPS6KA3,RRAD,SHC1,STAT3,YWHAB,IRS2,CDK5R1,RPS6KA5,TRIB1,ARC
13_Member	Reactome Gene Sets	R-HSA-166520	Signaling by NTRKs	-18.4533	-16.6426	44/134	116,387,581,673,1020,1175,1211,1385,1432,1785,1846,1848,1958,2033,2353,2885,2889,3265,3398,3399,3727,3845,4066,4209,4893,4914,5295,5528,5594,5604,5781,5879,5898,5978,6197,6236,6464,6774,7529,8660,8851,9252,10221,23237	ADCYAP1,RHOA,BAX,BRAF,CDK5,AP2S1,CLTA,CREB1,MAPK14,DNM2,DUSP4,DUSP6,EGR1,EP300,FOS,GRB2,RAPGEF1,HRAS,ID2,ID3,JUND,KRAS,LYL1,MEF2D,NRAS,NTRK1,PIK3R1,PPP2R5D,MAPK1,MAP2K1,PTPN11,RAC1,RALA,REST,RPS6KA3,RRAD,SHC1,STAT3,YWHAB,IRS2,CDK5R1,RPS6KA5,TRIB1,ARC
13_Member	Reactome Gene Sets	R-HSA-198725	Nuclear Events (kinase and transcription factor activation)	-11.405	-10.0183	23/61	1020,1385,1432,1785,1846,1848,1958,2033,2353,3398,3399,3727,4066,4209,5528,5594,5978,6197,6236,8851,9252,10221,23237	CDK5,CREB1,MAPK14,DNM2,DUSP4,DUSP6,EGR1,EP300,FOS,ID2,ID3,JUND,LYL1,MEF2D,PPP2R5D,MAPK1,REST,RPS6KA3,RRAD,CDK5R1,RPS6KA5,TRIB1,ARC
13_Member	Reactome Gene Sets	R-HSA-9031628	NGF-stimulated transcription	-8.76576	-7.5548	16/39	1020,1385,1785,1958,2033,2353,3398,3399,3727,4066,4209,5978,6236,8851,10221,23237	CDK5,CREB1,DNM2,EGR1,EP300,FOS,ID2,ID3,JUND,LYL1,MEF2D,REST,RRAD,CDK5R1,TRIB1,ARC
14_Summary	GO Biological Processes	GO:0000165	MAPK cascade	-41.6041	-38.5848	168/775	116,207,351,367,409,650,655,673,678,728,920,1234,1432,1490,1499,1540,1846,1847,1848,1906,1942,1956,1969,2064,2081,2149,2150,2246,2247,2254,2260,2358,2629,2885,3082,3146,3265,3276,3340,3479,3480,3569,3606,3611,3735,3845,3976,4067,4086,4089,4214,4215,4217,4221,4293,4294,4486,4504,4609,4771,4838,4851,4853,4868,4893,4914,5027,5037,5156,5245,5294,5314,5336,5468,5478,5500,5501,5536,5580,5590,5594,5604,…	ADCYAP1,AKT1,APP,AR,ARRB2,BMP2,BMP7,BRAF,ZFP36L2,C5AR1,CD4,CCR5,MAPK14,CCN2,CTNNB1,CYLD,DUSP4,DUSP5,DUSP6,EDN1,EFNA1,EGFR,EPHA2,ERBB2,ERN1,F2R,F2RL1,FGF1,FGF2,FGF9,FGFR1,FPR2,GBA,GRB2,HGF,HMGB1,HRAS,PRMT1,NDST1,IGF1,IGF1R,IL6,IL18,ILK,KARS1,KRAS,LIF,LYN,SMAD1,SMAD4,MAP3K1,MAP3K3,MAP3K5,MEN1,MAP3K9,MAP3K10,MST1R,MT3,MYC,NF2,NODAL,NOTCH1,NOTCH2,NPHS1,NRAS,NTRK1,P2RX7,PEBP1,PDGFRA,PHB,PIK3CG,PKHD1,P…
14_Member	GO Biological Processes	GO:0000165	MAPK cascade	-41.6041	-38.5848	168/775	116,207,351,367,409,650,655,673,678,728,920,1234,1432,1490,1499,1540,1846,1847,1848,1906,1942,1956,1969,2064,2081,2149,2150,2246,2247,2254,2260,2358,2629,2885,3082,3146,3265,3276,3340,3479,3480,3569,3606,3611,3735,3845,3976,4067,4086,4089,4214,4215,4217,4221,4293,4294,4486,4504,4609,4771,4838,4851,4853,4868,4893,4914,5027,5037,5156,5245,5294,5314,5336,5468,5478,5500,5501,5536,5580,5590,5594,5604,…	ADCYAP1,AKT1,APP,AR,ARRB2,BMP2,BMP7,BRAF,ZFP36L2,C5AR1,CD4,CCR5,MAPK14,CCN2,CTNNB1,CYLD,DUSP4,DUSP5,DUSP6,EDN1,EFNA1,EGFR,EPHA2,ERBB2,ERN1,F2R,F2RL1,FGF1,FGF2,FGF9,FGFR1,FPR2,GBA,GRB2,HGF,HMGB1,HRAS,PRMT1,NDST1,IGF1,IGF1R,IL6,IL18,ILK,KARS1,KRAS,LIF,LYN,SMAD1,SMAD4,MAP3K1,MAP3K3,MAP3K5,MEN1,MAP3K9,MAP3K10,MST1R,MT3,MYC,NF2,NODAL,NOTCH1,NOTCH2,NPHS1,NRAS,NTRK1,P2RX7,PEBP1,PDGFRA,PHB,PIK3CG,PKHD1,P…
14_Member	GO Biological Processes	GO:0080135	regulation of cellular response to stress	-38.1592	-35.316	148/663	142,207,351,472,578,581,596,637,650,655,657,672,1021,1025,1054,1191,1490,1499,1540,1660,1859,1956,2023,2033,2067,2081,2150,2281,2309,2316,2475,2521,2530,2876,2907,2932,3082,3146,3159,3265,3276,3303,3480,3638,3845,4067,4170,4189,4193,4215,4217,4221,4233,4294,4487,4582,4609,4869,4904,5074,5111,5295,5366,5371,5478,5580,5594,5604,5728,5743,5770,5792,5871,5978,6154,6386,6421,6498,6504,6647,6648,6696,7…	PARP1,AKT1,APP,ATM,BAK1,BAX,BCL2,BID,BMP2,BMP7,BMPR1A,BRCA1,CDK6,CDK9,CEBPG,CLU,CCN2,CTNNB1,CYLD,DHX9,DYRK1A,EGFR,ENO1,EP300,ERCC1,ERN1,F2RL1,FKBP1B,FOXO3,FLNA,MTOR,FUS,FUT8,GPX1,GRINA,GSK3B,HGF,HMGB1,HMGA1,HRAS,PRMT1,HSPA1A,IGF1R,INSIG1,KRAS,LYN,MCL1,DNAJB9,MDM2,MAP3K3,MAP3K5,MEN1,MET,MAP3K10,MSX1,MUC1,MYC,NPM1,YBX1,PAWR,PCNA,PIK3R1,PMAIP1,PML,PPIA,PRKCD,MAPK1,MAP2K1,PTEN,PTGS2,PTPN1,PTPRF,MAP4K…
14_Member	GO Biological Processes	GO:0043408	regulation of MAPK cascade	-36.6688	-33.9092	147/674	116,207,351,367,409,650,655,673,728,920,1490,1499,1540,1846,1848,1906,1942,1956,1969,2064,2081,2149,2150,2246,2247,2254,2260,2358,2629,2885,3082,3146,3265,3276,3340,3479,3480,3569,3611,3845,3976,4067,4089,4215,4217,4221,4294,4486,4504,4609,4771,4838,4851,4853,4914,5027,5037,5156,5245,5294,5314,5336,5468,5478,5580,5590,5594,5604,5606,5728,5770,5777,5781,5871,5908,6091,6355,6367,6386,6464,6504,6647…	ADCYAP1,AKT1,APP,AR,ARRB2,BMP2,BMP7,BRAF,C5AR1,CD4,CCN2,CTNNB1,CYLD,DUSP4,DUSP6,EDN1,EFNA1,EGFR,EPHA2,ERBB2,ERN1,F2R,F2RL1,FGF1,FGF2,FGF9,FGFR1,FPR2,GBA,GRB2,HGF,HMGB1,HRAS,PRMT1,NDST1,IGF1,IGF1R,IL6,ILK,KRAS,LIF,LYN,SMAD4,MAP3K3,MAP3K5,MEN1,MAP3K10,MST1R,MT3,MYC,NF2,NODAL,NOTCH1,NOTCH2,NTRK1,P2RX7,PEBP1,PDGFRA,PHB,PIK3CG,PKHD1,PLCG2,PPARG,PPIA,PRKCD,PRKCZ,MAPK1,MAP2K1,MAP2K3,PTEN,PTPN1,PTPN6,PTP…
14_Member	GO Biological Processes	GO:0043410	positive regulation of MAPK cascade	-25.6525	-23.4462	104/481	116,351,367,409,650,673,728,920,1490,1499,1906,1942,1956,2064,2081,2149,2150,2246,2247,2254,2260,2358,3082,3146,3265,3276,3340,3479,3480,3569,3611,3845,3976,4215,4217,4294,4486,4504,4838,4851,4853,4914,5156,5245,5294,5336,5478,5590,5604,5606,5728,5770,5781,5871,5908,6091,6355,6367,6386,6464,6504,6647,6850,6899,7039,7040,7042,7046,7098,7099,7124,7185,7186,7422,7474,7786,8567,8600,8829,8837,8877,90…	ADCYAP1,APP,AR,ARRB2,BMP2,BRAF,C5AR1,CD4,CCN2,CTNNB1,EDN1,EFNA1,EGFR,ERBB2,ERN1,F2R,F2RL1,FGF1,FGF2,FGF9,FGFR1,FPR2,HGF,HMGB1,HRAS,PRMT1,NDST1,IGF1,IGF1R,IL6,ILK,KRAS,LIF,MAP3K3,MAP3K5,MAP3K10,MST1R,MT3,NODAL,NOTCH1,NOTCH2,NTRK1,PDGFRA,PHB,PIK3CG,PLCG2,PPIA,PRKCZ,MAP2K1,MAP2K3,PTEN,PTPN1,PTPN11,MAP4K2,RAP1B,ROBO1,CCL8,CCL22,SDCBP,SHC1,SLAMF1,SOD1,SYK,TBX1,TGFA,TGFB1,TGFB2,TGFBR1,TLR3,TLR4,TNF,TRA…
14_Member	GO Biological Processes	GO:0070302	regulation of stress-activated protein kinase signaling cascade	-19.1575	-17.2955	55/197	207,351,650,1490,1540,1956,2150,3082,3146,3265,3276,3480,4067,4215,4217,4221,4294,4609,5478,5594,5604,5871,6386,6504,7042,7049,7098,7099,7124,7185,7186,7422,7430,7474,8600,8877,9448,9464,9965,10114,10494,10912,11221,11235,23162,23542,26191,27250,28996,29969,54106,54910,64170,83737,114609	AKT1,APP,BMP2,CCN2,CYLD,EGFR,F2RL1,HGF,HMGB1,HRAS,PRMT1,IGF1R,LYN,MAP3K3,MAP3K5,MEN1,MAP3K10,MYC,PPIA,MAPK1,MAP2K1,MAP4K2,SDCBP,SLAMF1,TGFB2,TGFBR3,TLR3,TLR4,TNF,TRAF1,TRAF2,VEGFA,EZR,WNT5A,TNFSF11,SPHK1,MAP4K4,HAND2,FGF19,HIPK3,STK25,GADD45G,DUSP10,PDCD10,MAPK8IP3,MAPK8IP2,PTPN22,PDCD4,HIPK2,MDFIC,TLR9,SEMA4C,CARD9,ITCH,TIRAP
14_Member	GO Biological Processes	GO:0031098	stress-activated protein kinase signaling cascade	-18.8261	-16.9829	62/248	207,351,387,650,1432,1490,1540,1956,2150,3082,3146,3265,3276,3480,4067,4215,4217,4221,4294,4609,4868,5478,5594,5604,5606,5871,6386,6416,6504,7042,7049,7098,7099,7124,7185,7186,7422,7430,7474,7786,8600,8877,9448,9464,9965,10114,10221,10494,10912,11221,11235,23162,23542,26191,27250,28996,29969,54106,54910,64170,83737,114609	AKT1,APP,RHOA,BMP2,MAPK14,CCN2,CYLD,EGFR,F2RL1,HGF,HMGB1,HRAS,PRMT1,IGF1R,LYN,MAP3K3,MAP3K5,MEN1,MAP3K10,MYC,NPHS1,PPIA,MAPK1,MAP2K1,MAP2K3,MAP4K2,SDCBP,MAP2K4,SLAMF1,TGFB2,TGFBR3,TLR3,TLR4,TNF,TRAF1,TRAF2,VEGFA,EZR,WNT5A,MAP3K12,TNFSF11,SPHK1,MAP4K4,HAND2,FGF19,HIPK3,TRIB1,STK25,GADD45G,DUSP10,PDCD10,MAPK8IP3,MAPK8IP2,PTPN22,PDCD4,HIPK2,MDFIC,TLR9,SEMA4C,CARD9,ITCH,TIRAP
14_Member	GO Biological Processes	GO:0070371	ERK1 and ERK2 cascade	-18.8058	-16.9652	74/337	116,351,409,650,673,678,728,920,1490,1846,1848,1956,1969,2064,2149,2150,2246,2247,2358,3146,3265,3479,3735,3976,4067,4089,4504,4609,4838,4851,4853,4914,5156,5245,5314,5590,5594,5604,5728,5770,5777,5781,5908,6355,6367,6464,6504,6850,7040,7049,7099,7124,7430,7534,7786,8600,8829,8837,9370,9464,9965,10318,10344,11221,11331,25865,26191,54206,64170,84868,114609,171389,255743,406985	ADCYAP1,APP,ARRB2,BMP2,BRAF,ZFP36L2,C5AR1,CD4,CCN2,DUSP4,DUSP6,EGFR,EPHA2,ERBB2,F2R,F2RL1,FGF1,FGF2,FPR2,HMGB1,HRAS,IGF1,KARS1,LIF,LYN,SMAD4,MT3,MYC,NODAL,NOTCH1,NOTCH2,NTRK1,PDGFRA,PHB,PKHD1,PRKCZ,MAPK1,MAP2K1,PTEN,PTPN1,PTPN6,PTPN11,RAP1B,CCL8,CCL22,SHC1,SLAMF1,SYK,TGFB1,TGFBR3,TLR4,TNF,EZR,YWHAZ,MAP3K12,TNFSF11,NRP1,CFLAR,ADIPOQ,HAND2,FGF19,TNIP1,CCL26,DUSP10,PHB2,PRKD2,PTPN22,ERRFI1,CARD9,HAV…
14_Member	GO Biological Processes	GO:0032872	regulation of stress-activated MAPK cascade	-18.7563	-16.9171	54/194	207,351,650,1490,1540,1956,2150,3082,3146,3265,3276,3480,4215,4217,4221,4294,4609,5478,5594,5604,5871,6386,6504,7042,7049,7098,7099,7124,7185,7186,7422,7430,7474,8600,8877,9448,9464,9965,10114,10494,10912,11221,11235,23162,23542,26191,27250,28996,29969,54106,54910,64170,83737,114609	AKT1,APP,BMP2,CCN2,CYLD,EGFR,F2RL1,HGF,HMGB1,HRAS,PRMT1,IGF1R,MAP3K3,MAP3K5,MEN1,MAP3K10,MYC,PPIA,MAPK1,MAP2K1,MAP4K2,SDCBP,SLAMF1,TGFB2,TGFBR3,TLR3,TLR4,TNF,TRAF1,TRAF2,VEGFA,EZR,WNT5A,TNFSF11,SPHK1,MAP4K4,HAND2,FGF19,HIPK3,STK25,GADD45G,DUSP10,PDCD10,MAPK8IP3,MAPK8IP2,PTPN22,PDCD4,HIPK2,MDFIC,TLR9,SEMA4C,CARD9,ITCH,TIRAP
14_Member	GO Biological Processes	GO:0051403	stress-activated MAPK cascade	-18.2403	-16.442	60/240	207,351,650,1432,1490,1540,1956,2150,3082,3146,3265,3276,3480,4215,4217,4221,4294,4609,4868,5478,5594,5604,5606,5871,6386,6416,6504,7042,7049,7098,7099,7124,7185,7186,7422,7430,7474,7786,8600,8877,9448,9464,9965,10114,10221,10494,10912,11221,11235,23162,23542,26191,27250,28996,29969,54106,54910,64170,83737,114609	AKT1,APP,BMP2,MAPK14,CCN2,CYLD,EGFR,F2RL1,HGF,HMGB1,HRAS,PRMT1,IGF1R,MAP3K3,MAP3K5,MEN1,MAP3K10,MYC,NPHS1,PPIA,MAPK1,MAP2K1,MAP2K3,MAP4K2,SDCBP,MAP2K4,SLAMF1,TGFB2,TGFBR3,TLR3,TLR4,TNF,TRAF1,TRAF2,VEGFA,EZR,WNT5A,MAP3K12,TNFSF11,SPHK1,MAP4K4,HAND2,FGF19,HIPK3,TRIB1,STK25,GADD45G,DUSP10,PDCD10,MAPK8IP3,MAPK8IP2,PTPN22,PDCD4,HIPK2,MDFIC,TLR9,SEMA4C,CARD9,ITCH,TIRAP
14_Member	GO Biological Processes	GO:0070372	regulation of ERK1 and ERK2 cascade	-18.1215	-16.3315	70/315	116,351,409,650,673,728,920,1490,1846,1848,1956,1969,2064,2149,2150,2246,2247,2358,3146,3265,3479,3976,4067,4089,4504,4838,4851,4853,4914,5156,5245,5314,5590,5604,5728,5770,5777,5781,5908,6355,6367,6464,6504,6850,7040,7049,7099,7124,7430,7534,7786,8600,8829,8837,9370,9464,9965,10318,10344,11221,11331,25865,26191,54206,64170,84868,114609,171389,255743,406985	ADCYAP1,APP,ARRB2,BMP2,BRAF,C5AR1,CD4,CCN2,DUSP4,DUSP6,EGFR,EPHA2,ERBB2,F2R,F2RL1,FGF1,FGF2,FPR2,HMGB1,HRAS,IGF1,LIF,LYN,SMAD4,MT3,NODAL,NOTCH1,NOTCH2,NTRK1,PDGFRA,PHB,PKHD1,PRKCZ,MAP2K1,PTEN,PTPN1,PTPN6,PTPN11,RAP1B,CCL8,CCL22,SHC1,SLAMF1,SYK,TGFB1,TGFBR3,TLR4,TNF,EZR,YWHAZ,MAP3K12,TNFSF11,NRP1,CFLAR,ADIPOQ,HAND2,FGF19,TNIP1,CCL26,DUSP10,PHB2,PRKD2,PTPN22,ERRFI1,CARD9,HAVCR2,TIRAP,NLRP6,NPNT,MIR…
14_Member	GO Biological Processes	GO:0046328	regulation of JNK cascade	-13.8098	-12.2774	38/133	207,351,1490,1540,1956,2150,3146,3265,3480,4217,4221,4294,5871,6386,6504,7049,7098,7099,7124,7185,7186,7474,8600,9448,9965,10114,10912,11221,23162,23542,26191,27250,28996,29969,54106,64170,83737,114609	AKT1,APP,CCN2,CYLD,EGFR,F2RL1,HMGB1,HRAS,IGF1R,MAP3K5,MEN1,MAP3K10,MAP4K2,SDCBP,SLAMF1,TGFBR3,TLR3,TLR4,TNF,TRAF1,TRAF2,WNT5A,TNFSF11,MAP4K4,FGF19,HIPK3,GADD45G,DUSP10,MAPK8IP3,MAPK8IP2,PTPN22,PDCD4,HIPK2,MDFIC,TLR9,CARD9,ITCH,TIRAP
14_Member	GO Biological Processes	GO:0070374	positive regulation of ERK1 and ERK2 cascade	-13.461	-11.9475	50/221	116,351,409,650,673,728,920,1490,1956,2149,2150,2246,2247,2358,3146,3265,3479,4504,4838,4851,4853,4914,5156,5245,5590,5604,5728,5781,5908,6355,6367,6464,6504,7040,7099,7124,7786,8600,8829,8837,9464,9965,10344,11331,25865,26191,64170,84868,114609,255743	ADCYAP1,APP,ARRB2,BMP2,BRAF,C5AR1,CD4,CCN2,EGFR,F2R,F2RL1,FGF1,FGF2,FPR2,HMGB1,HRAS,IGF1,MT3,NODAL,NOTCH1,NOTCH2,NTRK1,PDGFRA,PHB,PRKCZ,MAP2K1,PTEN,PTPN11,RAP1B,CCL8,CCL22,SHC1,SLAMF1,TGFB1,TLR4,TNF,MAP3K12,TNFSF11,NRP1,CFLAR,HAND2,FGF19,CCL26,PHB2,PRKD2,PTPN22,CARD9,HAVCR2,TIRAP,NPNT
14_Member	GO Biological Processes	GO:0007254	JNK cascade	-13.0744	-11.5842	42/167	207,351,1490,1540,1956,2150,3146,3265,3480,4217,4221,4294,4868,5871,6386,6416,6504,7049,7098,7099,7124,7185,7186,7474,7786,8600,9448,9965,10114,10221,10912,11221,23162,23542,26191,27250,28996,29969,54106,64170,83737,114609	AKT1,APP,CCN2,CYLD,EGFR,F2RL1,HMGB1,HRAS,IGF1R,MAP3K5,MEN1,MAP3K10,NPHS1,MAP4K2,SDCBP,MAP2K4,SLAMF1,TGFBR3,TLR3,TLR4,TNF,TRAF1,TRAF2,WNT5A,MAP3K12,TNFSF11,MAP4K4,FGF19,HIPK3,TRIB1,GADD45G,DUSP10,MAPK8IP3,MAPK8IP2,PTPN22,PDCD4,HIPK2,MDFIC,TLR9,CARD9,ITCH,TIRAP
14_Member	GO Biological Processes	GO:0070304	positive regulation of stress-activated protein kinase signaling cascade	-13.0051	-11.5207	36/127	351,650,1490,2150,3146,3265,3276,4067,4215,4217,4294,5871,6386,6504,7042,7098,7099,7124,7185,7186,7422,7474,8600,8877,9464,9965,10494,10912,11235,23162,23542,28996,54106,54910,64170,114609	APP,BMP2,CCN2,F2RL1,HMGB1,HRAS,PRMT1,LYN,MAP3K3,MAP3K5,MAP3K10,MAP4K2,SDCBP,SLAMF1,TGFB2,TLR3,TLR4,TNF,TRAF1,TRAF2,VEGFA,WNT5A,TNFSF11,SPHK1,HAND2,FGF19,STK25,GADD45G,PDCD10,MAPK8IP3,MAPK8IP2,HIPK2,TLR9,SEMA4C,CARD9,TIRAP
14_Member	GO Biological Processes	GO:0032874	positive regulation of stress-activated MAPK cascade	-12.4897	-11.0397	35/125	351,650,1490,2150,3146,3265,3276,4215,4217,4294,5871,6386,6504,7042,7098,7099,7124,7185,7186,7422,7474,8600,8877,9464,9965,10494,10912,11235,23162,23542,28996,54106,54910,64170,114609	APP,BMP2,CCN2,F2RL1,HMGB1,HRAS,PRMT1,MAP3K3,MAP3K5,MAP3K10,MAP4K2,SDCBP,SLAMF1,TGFB2,TLR3,TLR4,TNF,TRAF1,TRAF2,VEGFA,WNT5A,TNFSF11,SPHK1,HAND2,FGF19,STK25,GADD45G,PDCD10,MAPK8IP3,MAPK8IP2,HIPK2,TLR9,SEMA4C,CARD9,TIRAP
14_Member	GO Biological Processes	GO:0046330	positive regulation of JNK cascade	-8.53165	-7.33519	24/88	351,1490,2150,3146,3265,4217,4294,5871,6386,6504,7098,7099,7124,7185,7186,7474,8600,9965,10912,23162,28996,54106,64170,114609	APP,CCN2,F2RL1,HMGB1,HRAS,MAP3K5,MAP3K10,MAP4K2,SDCBP,SLAMF1,TLR3,TLR4,TNF,TRAF1,TRAF2,WNT5A,TNFSF11,FGF19,GADD45G,MAPK8IP3,HIPK2,TLR9,CARD9,TIRAP
15_Summary	KEGG Pathway	hsa05200	Pathways in cancer	-41.4757	-38.4757	115/395	115,207,331,332,356,367,387,581,596,613,637,650,673,861,867,898,999,1019,1021,1026,1027,1050,1282,1285,1487,1499,1612,1855,1869,1870,1956,2033,2064,2113,2149,2246,2247,2254,2260,2353,2475,2737,2768,2773,2776,2885,2932,2956,3082,3265,3320,3479,3480,3569,3673,3675,3688,3725,3845,3909,4087,4089,4149,4193,4233,4292,4318,4609,4843,4893,4914,5156,5293,5295,5336,5371,5468,5594,5604,5728,5743,5879,5898,5…	ADCY9,AKT1,XIAP,BIRC5,FASLG,AR,RHOA,BAX,BCL2,BCR,BID,BMP2,BRAF,RUNX1,CBL,CCNE1,CDH1,CDK4,CDK6,CDKN1A,CDKN1B,CEBPA,COL4A1,COL4A3,CTBP1,CTNNB1,DAPK1,DVL1,E2F1,E2F2,EGFR,EP300,ERBB2,ETS1,F2R,FGF1,FGF2,FGF9,FGFR1,FOS,MTOR,GLI3,GNA12,GNAI3,GNAQ,GRB2,GSK3B,MSH6,HGF,HRAS,HSP90AA1,IGF1,IGF1R,IL6,ITGA2,ITGA3,ITGB1,JUN,KRAS,LAMA3,SMAD2,SMAD4,MAX,MDM2,MET,MLH1,MMP9,MYC,NOS2,NRAS,NTRK1,PDGFRA,PIK3CD,PIK3R1,P…
15_Member	KEGG Pathway	hsa05200	Pathways in cancer	-41.4757	-38.4757	115/395	115,207,331,332,356,367,387,581,596,613,637,650,673,861,867,898,999,1019,1021,1026,1027,1050,1282,1285,1487,1499,1612,1855,1869,1870,1956,2033,2064,2113,2149,2246,2247,2254,2260,2353,2475,2737,2768,2773,2776,2885,2932,2956,3082,3265,3320,3479,3480,3569,3673,3675,3688,3725,3845,3909,4087,4089,4149,4193,4233,4292,4318,4609,4843,4893,4914,5156,5293,5295,5336,5371,5468,5594,5604,5728,5743,5879,5898,5…	ADCY9,AKT1,XIAP,BIRC5,FASLG,AR,RHOA,BAX,BCL2,BCR,BID,BMP2,BRAF,RUNX1,CBL,CCNE1,CDH1,CDK4,CDK6,CDKN1A,CDKN1B,CEBPA,COL4A1,COL4A3,CTBP1,CTNNB1,DAPK1,DVL1,E2F1,E2F2,EGFR,EP300,ERBB2,ETS1,F2R,FGF1,FGF2,FGF9,FGFR1,FOS,MTOR,GLI3,GNA12,GNAI3,GNAQ,GRB2,GSK3B,MSH6,HGF,HRAS,HSP90AA1,IGF1,IGF1R,IL6,ITGA2,ITGA3,ITGB1,JUN,KRAS,LAMA3,SMAD2,SMAD4,MAX,MDM2,MET,MLH1,MMP9,MYC,NOS2,NRAS,NTRK1,PDGFRA,PIK3CD,PIK3R1,P…
15_Member	KEGG Pathway	hsa04151	PI3K-Akt signaling pathway	-35.6438	-32.9053	105/380	207,285,356,596,672,894,898,1019,1021,1026,1027,1277,1278,1282,1285,1298,1385,1435,1942,1956,1969,1975,1977,1978,2064,2065,2069,2149,2246,2247,2254,2260,2309,2475,2885,2932,3082,3265,3320,3454,3456,3479,3480,3566,3569,3570,3673,3675,3678,3688,3690,3695,3696,3845,3909,4068,4170,4193,4233,4609,4846,4893,4914,5156,5293,5294,5295,5528,5529,5562,5563,5586,5594,5604,5618,5728,5879,6194,6696,6850,7039,7…	AKT1,ANGPT2,FASLG,BCL2,BRCA1,CCND2,CCNE1,CDK4,CDK6,CDKN1A,CDKN1B,COL1A1,COL1A2,COL4A1,COL4A3,COL9A2,CREB1,CSF1,EFNA1,EGFR,EPHA2,EIF4B,EIF4E,EIF4EBP1,ERBB2,ERBB3,EREG,F2R,FGF1,FGF2,FGF9,FGFR1,FOXO3,MTOR,GRB2,GSK3B,HGF,HRAS,HSP90AA1,IFNAR1,IFNB1,IGF1,IGF1R,IL4R,IL6,IL6R,ITGA2,ITGA3,ITGA5,ITGB1,ITGB3,ITGB7,ITGB8,KRAS,LAMA3,SH2D1A,MCL1,MDM2,MET,MYC,NOS3,NRAS,NTRK1,PDGFRA,PIK3CD,PIK3CG,PIK3R1,PPP2R5D,…
15_Member	KEGG Pathway	ko04151	PI3K-Akt signaling pathway	-33.2241	-30.6259	96/342	207,285,356,596,672,894,898,1019,1021,1026,1027,1277,1278,1282,1285,1298,1385,1435,1942,1956,1969,1975,1977,1978,2149,2246,2247,2254,2260,2309,2475,2885,2932,3082,3265,3320,3454,3456,3479,3480,3566,3569,3570,3673,3675,3678,3688,3690,3695,3696,3845,3909,4170,4193,4233,4609,4846,4893,5156,5293,5294,5295,5528,5529,5562,5563,5586,5594,5604,5618,5728,5879,6194,6696,6850,7058,7059,7099,7157,7184,7422,7…	AKT1,ANGPT2,FASLG,BCL2,BRCA1,CCND2,CCNE1,CDK4,CDK6,CDKN1A,CDKN1B,COL1A1,COL1A2,COL4A1,COL4A3,COL9A2,CREB1,CSF1,EFNA1,EGFR,EPHA2,EIF4B,EIF4E,EIF4EBP1,F2R,FGF1,FGF2,FGF9,FGFR1,FOXO3,MTOR,GRB2,GSK3B,HGF,HRAS,HSP90AA1,IFNAR1,IFNB1,IGF1,IGF1R,IL4R,IL6,IL6R,ITGA2,ITGA3,ITGA5,ITGB1,ITGB3,ITGB7,ITGB8,KRAS,LAMA3,MCL1,MDM2,MET,MYC,NOS3,NRAS,PDGFRA,PIK3CD,PIK3CG,PIK3R1,PPP2R5D,PPP2R5E,PRKAA1,PRKAA2,PKN2,MAP…
15_Member	WikiPathways	WP4172	PI3K-Akt signaling pathway	-31.4129	-28.9145	94/345	207,285,356,596,672,894,898,1019,1021,1026,1027,1277,1278,1282,1285,1298,1385,1435,1942,1956,1969,1975,1977,1978,2149,2246,2247,2254,2260,2309,2475,2885,2932,3082,3265,3320,3454,3456,3479,3480,3566,3569,3570,3673,3675,3678,3688,3690,3695,3696,3845,3909,4170,4193,4233,4609,4846,4893,4914,5156,5293,5294,5295,5528,5529,5562,5563,5586,5594,5604,5618,5728,5879,6194,6696,6850,7039,7058,7059,7099,7157,7…	AKT1,ANGPT2,FASLG,BCL2,BRCA1,CCND2,CCNE1,CDK4,CDK6,CDKN1A,CDKN1B,COL1A1,COL1A2,COL4A1,COL4A3,COL9A2,CREB1,CSF1,EFNA1,EGFR,EPHA2,EIF4B,EIF4E,EIF4EBP1,F2R,FGF1,FGF2,FGF9,FGFR1,FOXO3,MTOR,GRB2,GSK3B,HGF,HRAS,HSP90AA1,IFNAR1,IFNB1,IGF1,IGF1R,IL4R,IL6,IL6R,ITGA2,ITGA3,ITGA5,ITGB1,ITGB3,ITGB7,ITGB8,KRAS,LAMA3,MCL1,MDM2,MET,MYC,NOS3,NRAS,NTRK1,PDGFRA,PIK3CD,PIK3CG,PIK3R1,PPP2R5D,PPP2R5E,PRKAA1,PRKAA2,PK…
15_Member	WikiPathways	WP3932	Focal adhesion: PI3K-Akt-mTOR-signaling pathway	-31.0051	-28.5242	88/309	207,285,1026,1027,1277,1278,1282,1289,1385,1435,1942,1956,1969,1975,1977,1978,2149,2246,2247,2254,2260,2309,2475,2885,2932,3082,3265,3320,3454,3456,3479,3480,3566,3570,3673,3675,3678,3683,3687,3688,3690,3695,3696,3845,3909,4193,4233,4843,4846,4893,5156,5208,5286,5293,5294,5295,5528,5529,5562,5563,5594,5604,5618,5728,6194,6517,6696,6720,7058,7059,7184,7422,8115,8408,8660,9180,9470,9623,9965,10319,…	AKT1,ANGPT2,CDKN1A,CDKN1B,COL1A1,COL1A2,COL4A1,COL5A1,CREB1,CSF1,EFNA1,EGFR,EPHA2,EIF4B,EIF4E,EIF4EBP1,F2R,FGF1,FGF2,FGF9,FGFR1,FOXO3,MTOR,GRB2,GSK3B,HGF,HRAS,HSP90AA1,IFNAR1,IFNB1,IGF1,IGF1R,IL4R,IL6R,ITGA2,ITGA3,ITGA5,ITGAL,ITGAX,ITGB1,ITGB3,ITGB7,ITGB8,KRAS,LAMA3,MDM2,MET,NOS2,NOS3,NRAS,PDGFRA,PFKFB2,PIK3C2A,PIK3CD,PIK3CG,PIK3R1,PPP2R5D,PPP2R5E,PRKAA1,PRKAA2,MAPK1,MAP2K1,PRLR,PTEN,RPS6,SLC2A4,…
15_Member	KEGG Pathway	hsa05205	Proteoglycans in cancer	-27.4682	-25.1999	69/218	60,71,207,356,387,673,818,867,1026,1432,1499,1956,1975,2064,2065,2099,2247,2260,2316,2475,2885,3082,3265,3479,3480,3569,3673,3678,3688,3690,3708,3845,4087,4193,4233,4318,4609,4893,5293,5295,5336,5500,5501,5594,5604,5777,5781,5879,6194,6385,6469,6774,7040,7042,7099,7124,7157,7291,7422,7430,7472,7474,7482,8731,10855,22883,27250,80326,89780	ACTB,ACTG1,AKT1,FASLG,RHOA,BRAF,CAMK2G,CBL,CDKN1A,MAPK14,CTNNB1,EGFR,EIF4B,ERBB2,ERBB3,ESR1,FGF2,FGFR1,FLNA,MTOR,GRB2,HGF,HRAS,IGF1,IGF1R,IL6,ITGA2,ITGA5,ITGB1,ITGB3,ITPR1,KRAS,SMAD2,MDM2,MET,MMP9,MYC,NRAS,PIK3CD,PIK3R1,PLCG2,PPP1CB,PPP1CC,MAPK1,MAP2K1,PTPN6,PTPN11,RAC1,RPS6,SDC4,SHH,STAT3,TGFB1,TGFB2,TLR4,TNF,TP53,TWIST1,VEGFA,EZR,WNT2,WNT5A,WNT2B,RNMT,HPSE,CLSTN1,PDCD4,WNT10A,WNT3A
15_Member	KEGG Pathway	ko05205	Proteoglycans in cancer	-27.063	-24.805	66/203	60,71,207,356,387,673,818,867,1026,1432,1499,1956,1975,2064,2065,2099,2247,2260,2316,2475,2885,3082,3265,3479,3480,3673,3678,3688,3690,3708,3845,4087,4193,4233,4318,4609,4893,5293,5295,5336,5500,5501,5594,5604,5777,5781,5879,6194,6385,6469,6774,7040,7042,7099,7124,7157,7291,7422,7430,7472,7474,7482,10855,27250,80326,89780	ACTB,ACTG1,AKT1,FASLG,RHOA,BRAF,CAMK2G,CBL,CDKN1A,MAPK14,CTNNB1,EGFR,EIF4B,ERBB2,ERBB3,ESR1,FGF2,FGFR1,FLNA,MTOR,GRB2,HGF,HRAS,IGF1,IGF1R,ITGA2,ITGA5,ITGB1,ITGB3,ITPR1,KRAS,SMAD2,MDM2,MET,MMP9,MYC,NRAS,PIK3CD,PIK3R1,PLCG2,PPP1CB,PPP1CC,MAPK1,MAP2K1,PTPN6,PTPN11,RAC1,RPS6,SDC4,SHH,STAT3,TGFB1,TGFB2,TLR4,TNF,TP53,TWIST1,VEGFA,EZR,WNT2,WNT5A,WNT2B,HPSE,PDCD4,WNT10A,WNT3A
15_Member	WikiPathways	WP306	Focal adhesion	-20.0748	-18.1618	57/202	60,71,81,207,331,387,596,673,894,1277,1278,1282,1499,1956,2064,2268,2316,2885,2889,2932,3082,3265,3479,3480,3611,3673,3675,3678,3688,3690,3695,3696,3725,3909,4233,4638,5156,5293,5295,5500,5501,5594,5604,5728,5879,5908,6464,6696,7058,7059,7094,7294,7422,8711,10319,10451,83660	ACTB,ACTG1,ACTN4,AKT1,XIAP,RHOA,BCL2,BRAF,CCND2,COL1A1,COL1A2,COL4A1,CTNNB1,EGFR,ERBB2,FGR,FLNA,GRB2,RAPGEF1,GSK3B,HGF,HRAS,IGF1,IGF1R,ILK,ITGA2,ITGA3,ITGA5,ITGB1,ITGB3,ITGB7,ITGB8,JUN,LAMA3,MET,MYLK,PDGFRA,PIK3CD,PIK3R1,PPP1CB,PPP1CC,MAPK1,MAP2K1,PTEN,RAC1,RAP1B,SHC1,SPP1,THBS2,THBS3,TLN1,TXK,VEGFA,TNK1,LAMC3,VAV3,TLN2
15_Member	KEGG Pathway	hsa04510	Focal adhesion	-19.6724	-17.7806	56/199	60,71,81,207,331,387,596,673,894,1277,1278,1282,1285,1298,1499,1956,2064,2316,2885,2889,2932,3082,3265,3479,3480,3611,3673,3675,3678,3688,3690,3695,3696,3725,3909,4233,4638,5156,5293,5295,5500,5501,5594,5604,5728,5879,5908,6464,6696,7058,7059,7094,7422,10319,10451,83660	ACTB,ACTG1,ACTN4,AKT1,XIAP,RHOA,BCL2,BRAF,CCND2,COL1A1,COL1A2,COL4A1,COL4A3,COL9A2,CTNNB1,EGFR,ERBB2,FLNA,GRB2,RAPGEF1,GSK3B,HGF,HRAS,IGF1,IGF1R,ILK,ITGA2,ITGA3,ITGA5,ITGB1,ITGB3,ITGB7,ITGB8,JUN,LAMA3,MET,MYLK,PDGFRA,PIK3CD,PIK3R1,PPP1CB,PPP1CC,MAPK1,MAP2K1,PTEN,RAC1,RAP1B,SHC1,SPP1,THBS2,THBS3,TLN1,VEGFA,LAMC3,VAV3,TLN2
15_Member	KEGG Pathway	ko04510	Focal adhesion	-19.6724	-17.7806	56/199	60,71,81,207,331,387,596,673,894,1277,1278,1282,1285,1298,1499,1956,2064,2316,2885,2889,2932,3082,3265,3479,3480,3611,3673,3675,3678,3688,3690,3695,3696,3725,3909,4233,4638,5156,5293,5295,5500,5501,5594,5604,5728,5879,5908,6464,6696,7058,7059,7094,7422,10319,10451,83660	ACTB,ACTG1,ACTN4,AKT1,XIAP,RHOA,BCL2,BRAF,CCND2,COL1A1,COL1A2,COL4A1,COL4A3,COL9A2,CTNNB1,EGFR,ERBB2,FLNA,GRB2,RAPGEF1,GSK3B,HGF,HRAS,IGF1,IGF1R,ILK,ITGA2,ITGA3,ITGA5,ITGB1,ITGB3,ITGB7,ITGB8,JUN,LAMA3,MET,MYLK,PDGFRA,PIK3CD,PIK3R1,PPP1CB,PPP1CC,MAPK1,MAP2K1,PTEN,RAC1,RAP1B,SHC1,SPP1,THBS2,THBS3,TLN1,VEGFA,LAMC3,VAV3,TLN2
15_Member	KEGG Pathway	hsa04015	Rap1 signaling pathway	-19.4293	-17.5533	60/228	60,71,115,207,285,387,673,805,808,999,1432,1435,1499,1942,1956,1969,2149,2246,2247,2254,2260,2357,2773,2776,2889,2902,3082,3265,3479,3480,3569,3683,3688,3690,3845,4233,4893,5156,5293,5295,5590,5594,5604,5606,5879,5898,5908,6494,7094,7422,8731,9732,9965,10235,22883,25865,26037,51378,56144,83660	ACTB,ACTG1,ADCY9,AKT1,ANGPT2,RHOA,BRAF,CALM2,CALM3,CDH1,MAPK14,CSF1,CTNNB1,EFNA1,EGFR,EPHA2,F2R,FGF1,FGF2,FGF9,FGFR1,FPR1,GNAI3,GNAQ,RAPGEF1,GRIN1,HGF,HRAS,IGF1,IGF1R,IL6,ITGAL,ITGB1,ITGB3,KRAS,MET,NRAS,PDGFRA,PIK3CD,PIK3R1,PRKCZ,MAPK1,MAP2K1,MAP2K3,RAC1,RALA,RAP1B,SIPA1,TLN1,VEGFA,RNMT,DOCK4,FGF19,RASGRP2,CLSTN1,PRKD2,SIPA1L1,ANGPT4,PCDHA4,TLN2
15_Member	KEGG Pathway	ko04015	Rap1 signaling pathway	-18.47	-16.6561	56/210	60,71,115,207,285,387,673,805,808,999,1432,1435,1499,1942,1956,1969,2149,2246,2247,2254,2260,2357,2773,2776,2889,2902,3082,3265,3479,3480,3683,3688,3690,3845,4233,4893,5156,5293,5295,5590,5594,5604,5606,5879,5898,5908,6494,7094,7422,9732,9965,10235,25865,26037,51378,83660	ACTB,ACTG1,ADCY9,AKT1,ANGPT2,RHOA,BRAF,CALM2,CALM3,CDH1,MAPK14,CSF1,CTNNB1,EFNA1,EGFR,EPHA2,F2R,FGF1,FGF2,FGF9,FGFR1,FPR1,GNAI3,GNAQ,RAPGEF1,GRIN1,HGF,HRAS,IGF1,IGF1R,ITGAL,ITGB1,ITGB3,KRAS,MET,NRAS,PDGFRA,PIK3CD,PIK3R1,PRKCZ,MAPK1,MAP2K1,MAP2K3,RAC1,RALA,RAP1B,SIPA1,TLN1,VEGFA,DOCK4,FGF19,RASGRP2,PRKD2,SIPA1L1,ANGPT4,TLN2
15_Member	KEGG Pathway	hsa04014	Ras signaling pathway	-14.0853	-12.5398	56/259	27,207,285,356,382,387,805,808,1435,1942,1956,1969,2113,2246,2247,2254,2260,2885,2902,3082,3265,3479,3480,3569,3845,4233,4893,4914,5156,5293,5295,5336,5586,5594,5604,5781,5868,5869,5878,5879,5898,5908,5921,5966,6464,6789,7039,7422,8605,8731,9965,10235,11186,22883,51378,85021	ABL2,AKT1,ANGPT2,FASLG,ARF6,RHOA,CALM2,CALM3,CSF1,EFNA1,EGFR,EPHA2,ETS1,FGF1,FGF2,FGF9,FGFR1,GRB2,GRIN1,HGF,HRAS,IGF1,IGF1R,IL6,KRAS,MET,NRAS,NTRK1,PDGFRA,PIK3CD,PIK3R1,PLCG2,PKN2,MAPK1,MAP2K1,PTPN11,RAB5A,RAB5B,RAB5C,RAC1,RALA,RAP1B,RASA1,REL,SHC1,STK4,TGFA,VEGFA,PLA2G4C,RNMT,FGF19,RASGRP2,RASSF1,CLSTN1,ANGPT4,REPS1
15_Member	KEGG Pathway	hsa04810	Regulation of actin cytoskeleton	-11.7535	-10.3456	46/212	60,71,81,387,673,1956,2147,2149,2246,2247,2254,2260,2768,3265,3673,3675,3678,3683,3687,3688,3690,3695,3696,3845,4627,4628,4638,4893,5156,5293,5295,5500,5501,5594,5604,5879,7430,8976,9965,10094,10109,10163,10451,10787,81873,200576	ACTB,ACTG1,ACTN4,RHOA,BRAF,EGFR,F2,F2R,FGF1,FGF2,FGF9,FGFR1,GNA12,HRAS,ITGA2,ITGA3,ITGA5,ITGAL,ITGAX,ITGB1,ITGB3,ITGB7,ITGB8,KRAS,MYH9,MYH10,MYLK,NRAS,PDGFRA,PIK3CD,PIK3R1,PPP1CB,PPP1CC,MAPK1,MAP2K1,RAC1,EZR,WASL,FGF19,ARPC3,ARPC2,WASF2,VAV3,NCKAP1,ARPC5L,PIKFYVE
15_Member	KEGG Pathway	ko04810	Regulation of actin cytoskeleton	-11.7535	-10.3456	46/212	60,71,81,387,673,1956,2147,2149,2246,2247,2254,2260,2768,3265,3673,3675,3678,3683,3687,3688,3690,3695,3696,3845,4627,4628,4638,4893,5156,5293,5295,5500,5501,5594,5604,5879,7430,8976,9965,10094,10109,10163,10451,10787,81873,200576	ACTB,ACTG1,ACTN4,RHOA,BRAF,EGFR,F2,F2R,FGF1,FGF2,FGF9,FGFR1,GNA12,HRAS,ITGA2,ITGA3,ITGA5,ITGAL,ITGAX,ITGB1,ITGB3,ITGB7,ITGB8,KRAS,MYH9,MYH10,MYLK,NRAS,PDGFRA,PIK3CD,PIK3R1,PPP1CB,PPP1CC,MAPK1,MAP2K1,RAC1,EZR,WASL,FGF19,ARPC3,ARPC2,WASF2,VAV3,NCKAP1,ARPC5L,PIKFYVE
15_Member	WikiPathways	WP4223	Ras signaling	-9.67931	-8.40324	39/185	27,207,356,382,387,805,808,1956,1969,2113,2260,2885,2902,3265,3480,3845,4233,4893,4914,5156,5293,5295,5336,5594,5604,5781,5868,5869,5878,5879,5898,5908,5921,5966,6464,6789,8605,10235,11186	ABL2,AKT1,FASLG,ARF6,RHOA,CALM2,CALM3,EGFR,EPHA2,ETS1,FGFR1,GRB2,GRIN1,HRAS,IGF1R,KRAS,MET,NRAS,NTRK1,PDGFRA,PIK3CD,PIK3R1,PLCG2,MAPK1,MAP2K1,PTPN11,RAB5A,RAB5B,RAB5C,RAC1,RALA,RAP1B,RASA1,REL,SHC1,STK4,PLA2G4C,RASGRP2,RASSF1
15_Member	WikiPathways	WP185	Integrin-mediated cell adhesion	-7.64078	-6.4997	25/104	207,673,2885,2889,3265,3611,3673,3675,3678,3683,3687,3688,3690,3695,3696,5594,5604,5606,5879,5908,6464,7094,10451,11132,23473	AKT1,BRAF,GRB2,RAPGEF1,HRAS,ILK,ITGA2,ITGA3,ITGA5,ITGAL,ITGAX,ITGB1,ITGB3,ITGB7,ITGB8,MAPK1,MAP2K1,MAP2K3,RAC1,RAP1B,SHC1,TLN1,VAV3,CAPN10,CAPN7
16_Summary	GO Biological Processes	GO:0048729	tissue morphogenesis	-39.3852	-36.4706	144/618	60,70,71,90,94,104,133,182,367,387,388,596,650,653,655,657,659,977,1282,1289,1435,1482,1499,1522,1855,1906,1951,1969,2022,2099,2195,2239,2246,2247,2280,2296,2316,2475,2648,2650,2697,2737,2821,2885,2926,3082,3202,3209,3516,3611,3624,3673,3675,3678,3687,3688,3690,3845,3909,3976,4040,4061,4086,4087,4089,4092,4193,4194,4233,4487,4609,4638,4771,4838,4846,4851,4853,4867,5241,5293,5310,5314,5371,5534,55…	ACTB,ACTC1,ACTG1,ACVR1,ACVRL1,ADARB1,ADM,JAG1,AR,RHOA,RHOB,BCL2,BMP2,BMP5,BMP7,BMPR1A,BMPR2,CD151,COL4A1,COL5A1,CSF1,NKX2-5,CTNNB1,CTSZ,DVL1,EDN1,CELSR3,EPHA2,ENG,ESR1,FAT1,GPC4,FGF1,FGF2,FKBP1A,FOXC1,FLNA,MTOR,KAT2A,GCNT1,GJA1,GLI3,GPI,GRB2,GRSF1,HGF,HOXA5,HOXA13,RBPJ,ILK,INHBA,ITGA2,ITGA3,ITGA5,ITGAX,ITGB1,ITGB3,KRAS,LAMA3,LIF,LRP6,LY6E,SMAD1,SMAD2,SMAD4,SMAD7,MDM2,MDM4,MET,MSX1,MYC,MYLK,NF2,NO…
16_Member	GO Biological Processes	GO:0048729	tissue morphogenesis	-39.3852	-36.4706	144/618	60,70,71,90,94,104,133,182,367,387,388,596,650,653,655,657,659,977,1282,1289,1435,1482,1499,1522,1855,1906,1951,1969,2022,2099,2195,2239,2246,2247,2280,2296,2316,2475,2648,2650,2697,2737,2821,2885,2926,3082,3202,3209,3516,3611,3624,3673,3675,3678,3687,3688,3690,3845,3909,3976,4040,4061,4086,4087,4089,4092,4193,4194,4233,4487,4609,4638,4771,4838,4846,4851,4853,4867,5241,5293,5310,5314,5371,5534,55…	ACTB,ACTC1,ACTG1,ACVR1,ACVRL1,ADARB1,ADM,JAG1,AR,RHOA,RHOB,BCL2,BMP2,BMP5,BMP7,BMPR1A,BMPR2,CD151,COL4A1,COL5A1,CSF1,NKX2-5,CTNNB1,CTSZ,DVL1,EDN1,CELSR3,EPHA2,ENG,ESR1,FAT1,GPC4,FGF1,FGF2,FKBP1A,FOXC1,FLNA,MTOR,KAT2A,GCNT1,GJA1,GLI3,GPI,GRB2,GRSF1,HGF,HOXA5,HOXA13,RBPJ,ILK,INHBA,ITGA2,ITGA3,ITGA5,ITGAX,ITGB1,ITGB3,KRAS,LAMA3,LIF,LRP6,LY6E,SMAD1,SMAD2,SMAD4,SMAD7,MDM2,MDM4,MET,MSX1,MYC,MYLK,NF2,NO…
16_Member	GO Biological Processes	GO:0048732	gland development	-35.0736	-32.3747	113/440	116,207,367,382,445,581,596,650,655,657,999,1027,1050,1054,1374,1385,1435,1482,1499,1723,1956,1969,2099,2113,2246,2247,2296,2627,2737,2876,3077,3082,3099,3175,3202,3205,3209,3265,3321,3398,3482,3516,3569,3673,3720,3845,4040,4061,4087,4089,4124,4233,4487,4781,4838,4851,4853,5111,5156,5241,5310,5371,5594,5604,5618,5629,5728,5896,5916,6091,6143,6239,6469,6647,6715,6777,6899,6943,7039,7040,7042,7046,…	ADCYAP1,AKT1,AR,ARF6,ASS1,BAX,BCL2,BMP2,BMP7,BMPR1A,CDH1,CDKN1B,CEBPA,CEBPG,CPT1A,CREB1,CSF1,NKX2-5,CTNNB1,DHODH,EGFR,EPHA2,ESR1,ETS1,FGF1,FGF2,FOXC1,GATA6,GLI3,GPX1,HFE,HGF,HK2,ONECUT1,HOXA5,HOXA9,HOXA13,HRAS,IGSF3,ID2,IGF2R,RBPJ,IL6,ITGA2,JARID2,KRAS,LRP6,LY6E,SMAD2,SMAD4,MAN2A1,MET,MSX1,NFIB,NODAL,NOTCH1,NOTCH2,PCNA,PDGFRA,PGR,PKD1,PML,MAPK1,MAP2K1,PRLR,PROX1,PTEN,RAG1,RARG,ROBO1,RPL19,RREB1,S…
16_Member	GO Biological Processes	GO:0002009	morphogenesis of an epithelium	-29.5287	-27.1307	114/509	60,71,90,94,133,182,367,387,388,596,650,653,655,977,1282,1289,1435,1482,1499,1522,1855,1906,1951,1969,2022,2099,2195,2239,2246,2247,2316,2475,2648,2697,2737,2885,2926,3082,3202,3209,3516,3611,3678,3687,3845,3909,3976,4040,4089,4233,4609,4838,4851,4853,4867,5241,5293,5310,5314,5371,5534,5613,5629,5728,5879,5898,5916,6201,6239,6262,6385,6469,6497,6659,6772,6789,6868,6943,7040,7042,7048,7124,7291,74…	ACTB,ACTG1,ACVR1,ACVRL1,ADM,JAG1,AR,RHOA,RHOB,BCL2,BMP2,BMP5,BMP7,CD151,COL4A1,COL5A1,CSF1,NKX2-5,CTNNB1,CTSZ,DVL1,EDN1,CELSR3,EPHA2,ENG,ESR1,FAT1,GPC4,FGF1,FGF2,FLNA,MTOR,KAT2A,GJA1,GLI3,GRB2,GRSF1,HGF,HOXA5,HOXA13,RBPJ,ILK,ITGA5,ITGAX,KRAS,LAMA3,LIF,LRP6,SMAD4,MET,MYC,NODAL,NOTCH1,NOTCH2,NPHP1,PGR,PIK3CD,PKD1,PKHD1,PML,PPP3R1,PRKX,PROX1,PTEN,RAC1,RALA,RARG,RPS7,RREB1,RYR2,SDC4,SHH,SKI,SOX4,STAT…
16_Member	GO Biological Processes	GO:0009792	embryo development ending in birth or egg hatching	-27.4144	-25.1496	126/633	86,90,94,115,133,207,320,367,579,648,650,653,655,657,659,672,705,1045,1050,1277,1376,1482,1499,1603,1855,1906,1969,2033,2182,2247,2260,2296,2395,2530,2551,2627,2648,2737,2821,2885,3202,3205,3276,3340,3479,3516,3688,3955,3976,4040,4061,4087,4089,4097,4124,4154,4487,4627,4838,4851,4853,4904,5079,5156,5310,5362,5594,5604,5629,5898,5916,6137,6201,6385,6469,6497,6498,6659,6789,6899,7026,7040,7042,7046…	ACTL6A,ACVR1,ACVRL1,ADCY9,ADM,AKT1,APBA1,AR,NKX3-2,BMI1,BMP2,BMP5,BMP7,BMPR1A,BMPR2,BRCA1,BYSL,CDX2,CEBPA,COL1A1,CPT2,NKX2-5,CTNNB1,DAD1,DVL1,EDN1,EPHA2,EP300,ACSL4,FGF2,FGFR1,FOXC1,FXN,FUT8,GABPA,GATA6,KAT2A,GLI3,GPI,GRB2,HOXA5,HOXA9,PRMT1,NDST1,IGF1,RBPJ,ITGB1,LFNG,LIF,LRP6,LY6E,SMAD2,SMAD4,MAFG,MAN2A1,MBNL1,MSX1,MYH9,NODAL,NOTCH1,NOTCH2,YBX1,PAX5,PDGFRA,PKD1,PLXNA2,MAPK1,MAP2K1,PROX1,RALA,RARG…
16_Member	GO Biological Processes	GO:0043009	chordate embryonic development	-25.991	-23.7755	121/613	86,90,94,115,133,207,320,367,579,648,650,653,655,657,659,672,705,1045,1050,1277,1376,1482,1499,1603,1855,1906,1969,2033,2260,2296,2530,2551,2627,2648,2737,2821,2885,3202,3205,3276,3340,3479,3516,3688,3955,3976,4040,4061,4087,4089,4097,4124,4154,4487,4627,4838,4851,4853,4904,5079,5156,5310,5362,5594,5604,5629,5898,5916,6137,6201,6385,6469,6497,6498,6659,6789,6899,7026,7040,7042,7046,7048,7157,7262…	ACTL6A,ACVR1,ACVRL1,ADCY9,ADM,AKT1,APBA1,AR,NKX3-2,BMI1,BMP2,BMP5,BMP7,BMPR1A,BMPR2,BRCA1,BYSL,CDX2,CEBPA,COL1A1,CPT2,NKX2-5,CTNNB1,DAD1,DVL1,EDN1,EPHA2,EP300,FGFR1,FOXC1,FUT8,GABPA,GATA6,KAT2A,GLI3,GPI,GRB2,HOXA5,HOXA9,PRMT1,NDST1,IGF1,RBPJ,ITGB1,LFNG,LIF,LRP6,LY6E,SMAD2,SMAD4,MAFG,MAN2A1,MBNL1,MSX1,MYH9,NODAL,NOTCH1,NOTCH2,YBX1,PAX5,PDGFRA,PKD1,PLXNA2,MAPK1,MAP2K1,PROX1,RALA,RARG,RPL13,RPS7,SDC…
16_Member	GO Biological Processes	GO:0060562	epithelial tube morphogenesis	-24.5142	-22.362	82/330	90,94,133,367,387,388,596,650,653,655,1282,1435,1482,1499,1522,1855,1906,1969,2022,2099,2246,2247,2648,2737,3202,3516,3611,3687,3845,4040,4089,4233,4609,4838,4851,4853,5241,5293,5310,5314,5371,5534,5613,5629,5898,5916,6201,6262,6385,6469,6497,6659,6789,6943,7040,7042,7048,7124,7291,7421,7422,7472,7474,7482,7490,8829,8915,9231,9464,9645,10395,11019,11331,23513,25865,25932,51804,54910,89780,131405,…	ACVR1,ACVRL1,ADM,AR,RHOA,RHOB,BCL2,BMP2,BMP5,BMP7,COL4A1,CSF1,NKX2-5,CTNNB1,CTSZ,DVL1,EDN1,EPHA2,ENG,ESR1,FGF1,FGF2,KAT2A,GLI3,HOXA5,RBPJ,ILK,ITGAX,KRAS,LRP6,SMAD4,MET,MYC,NODAL,NOTCH1,NOTCH2,PGR,PIK3CD,PKD1,PKHD1,PML,PPP3R1,PRKX,PROX1,RALA,RARG,RPS7,RYR2,SDC4,SHH,SKI,SOX4,STK4,TCF21,TGFB1,TGFB2,TGFBR2,TNF,TWIST1,VDR,VEGFA,WNT2,WNT5A,WNT2B,WT1,NRP1,BCL10,DLG5,HAND2,MICAL2,DLC1,LIAS,PHB2,SCRIB,PRK…
16_Member	GO Biological Processes	GO:0048598	embryonic morphogenesis	-23.3708	-21.2855	114/595	90,133,367,579,581,648,653,655,657,659,1289,1294,1482,1499,1844,1846,1847,1855,1906,1942,1969,2022,2247,2296,2627,2648,2697,2737,2821,2885,2926,3170,3202,3205,3209,3340,3398,3624,3638,3673,3675,3678,3688,3690,3909,4040,4086,4087,4089,4154,4318,4487,4488,4646,4771,4838,4851,4853,4904,5079,5156,5573,5594,5629,5898,5916,6194,6201,6262,6385,6469,6497,6647,6659,6789,6899,6943,7040,7042,7046,7048,7157,…	ACVR1,ADM,AR,NKX3-2,BAX,BMI1,BMP5,BMP7,BMPR1A,BMPR2,COL5A1,COL7A1,NKX2-5,CTNNB1,DUSP2,DUSP4,DUSP5,DVL1,EDN1,EFNA1,EPHA2,ENG,FGF2,FOXC1,GATA6,KAT2A,GJA1,GLI3,GPI,GRB2,GRSF1,FOXA2,HOXA5,HOXA9,HOXA13,NDST1,ID2,INHBA,INSIG1,ITGA2,ITGA3,ITGA5,ITGB1,ITGB3,LAMA3,LRP6,SMAD1,SMAD2,SMAD4,MBNL1,MMP9,MSX1,MSX2,MYO6,NF2,NODAL,NOTCH1,NOTCH2,YBX1,PAX5,PDGFRA,PRKAR1A,MAPK1,PROX1,RALA,RARG,RPS6,RPS7,RYR2,SDC4,SHH…
16_Member	GO Biological Processes	GO:0001701	in utero embryonic development	-22.3594	-20.3199	84/369	86,90,94,115,133,207,320,367,648,650,653,655,657,705,1045,1050,1376,1499,1603,1906,2296,2530,2551,2627,2648,2737,2821,2885,3276,3479,3516,3688,3976,4061,4087,4089,4097,4124,4154,4487,4627,4838,4851,4853,4904,5156,5310,5594,5604,6137,6498,6789,7026,7046,7048,7157,7262,7291,7320,7422,7472,8178,8452,8533,8894,9318,9464,10018,10087,10155,10365,10436,10454,28982,53918,57178,60626,60681,81502,89780,129…	ACTL6A,ACVR1,ACVRL1,ADCY9,ADM,AKT1,APBA1,AR,BMI1,BMP2,BMP5,BMP7,BMPR1A,BYSL,CDX2,CEBPA,CPT2,CTNNB1,DAD1,EDN1,FOXC1,FUT8,GABPA,GATA6,KAT2A,GLI3,GPI,GRB2,PRMT1,IGF1,RBPJ,ITGB1,LIF,LY6E,SMAD2,SMAD4,MAFG,MAN2A1,MBNL1,MSX1,MYH9,NODAL,NOTCH1,NOTCH2,YBX1,PDGFRA,PKD1,MAPK1,MAP2K1,RPL13,SKIL,STK4,NR2F2,TGFBR1,TGFBR2,TP53,PHLDA2,TWIST1,UBE2B,VEGFA,WNT2,ELL,CUL3,COPS3,EIF2S2,COPS2,HAND2,BCL2L11,CERT1,TRIM28…
16_Member	GO Biological Processes	GO:0061138	morphogenesis of a branching epithelium	-18.5207	-16.6968	52/183	90,133,367,596,650,655,1282,1435,1499,1522,1906,1969,2022,2099,2246,2247,2737,2885,3082,3202,3209,3611,3845,4040,4089,4233,4609,4851,5241,5310,5314,5371,5534,5629,6469,6789,6943,7048,7124,7421,7422,7472,7474,7482,7490,8829,9231,11331,25932,51804,157506,255743	ACVR1,ADM,AR,BCL2,BMP2,BMP7,COL4A1,CSF1,CTNNB1,CTSZ,EDN1,EPHA2,ENG,ESR1,FGF1,FGF2,GLI3,GRB2,HGF,HOXA5,HOXA13,ILK,KRAS,LRP6,SMAD4,MET,MYC,NOTCH1,PGR,PKD1,PKHD1,PML,PPP3R1,PROX1,SHH,STK4,TCF21,TGFBR2,TNF,VDR,VEGFA,WNT2,WNT5A,WNT2B,WT1,NRP1,DLG5,PHB2,CLIC4,SIX4,RDH10,NPNT
16_Member	GO Biological Processes	GO:0048754	branching morphogenesis of an epithelial tube	-18.4528	-16.6426	47/152	90,367,596,650,655,1282,1435,1499,1522,1906,1969,2022,2099,2246,2247,2737,3202,3611,3845,4040,4089,4233,4609,4851,5241,5310,5314,5371,5534,6469,6789,6943,7048,7124,7421,7422,7472,7474,7482,7490,8829,9231,11331,25932,51804,157506,255743	ACVR1,AR,BCL2,BMP2,BMP7,COL4A1,CSF1,CTNNB1,CTSZ,EDN1,EPHA2,ENG,ESR1,FGF1,FGF2,GLI3,HOXA5,ILK,KRAS,LRP6,SMAD4,MET,MYC,NOTCH1,PGR,PKD1,PKHD1,PML,PPP3R1,SHH,STK4,TCF21,TGFBR2,TNF,VDR,VEGFA,WNT2,WNT5A,WNT2B,WT1,NRP1,DLG5,PHB2,CLIC4,SIX4,RDH10,NPNT
16_Member	GO Biological Processes	GO:0001763	morphogenesis of a branching structure	-16.9915	-15.2683	52/197	90,133,367,596,650,655,1282,1435,1499,1522,1906,1969,2022,2099,2246,2247,2737,2885,3082,3202,3209,3611,3845,4040,4089,4233,4609,4851,5241,5310,5314,5371,5534,5629,6469,6789,6943,7048,7124,7421,7422,7472,7474,7482,7490,8829,9231,11331,25932,51804,157506,255743	ACVR1,ADM,AR,BCL2,BMP2,BMP7,COL4A1,CSF1,CTNNB1,CTSZ,EDN1,EPHA2,ENG,ESR1,FGF1,FGF2,GLI3,GRB2,HGF,HOXA5,HOXA13,ILK,KRAS,LRP6,SMAD4,MET,MYC,NOTCH1,PGR,PKD1,PKHD1,PML,PPP3R1,PROX1,SHH,STK4,TCF21,TGFBR2,TNF,VDR,VEGFA,WNT2,WNT5A,WNT2B,WT1,NRP1,DLG5,PHB2,CLIC4,SIX4,RDH10,NPNT
16_Member	GO Biological Processes	GO:0022612	gland morphogenesis	-15.4397	-13.8183	38/120	367,581,596,655,1435,1969,2099,2246,2737,3082,3209,3569,4040,4781,4851,4853,5241,5371,5629,5916,6469,7039,7040,7042,7048,7124,7128,7421,7430,7474,7494,8452,8829,8837,11331,23513,55679,89780	AR,BAX,BCL2,BMP7,CSF1,EPHA2,ESR1,FGF1,GLI3,HGF,HOXA13,IL6,LRP6,NFIB,NOTCH1,NOTCH2,PGR,PML,PROX1,RARG,SHH,TGFA,TGFB1,TGFB2,TGFBR2,TNF,TNFAIP3,VDR,EZR,WNT5A,XBP1,CUL3,NRP1,CFLAR,PHB2,SCRIB,LIMS2,WNT3A
16_Member	GO Biological Processes	GO:0048568	embryonic organ development	-12.6729	-11.2116	74/433	90,133,207,579,648,653,655,657,1045,1050,1482,1499,1855,1906,1942,1969,2020,2022,2067,2296,2737,2885,3202,3205,3340,3398,3399,3516,3638,3976,4040,4087,4487,4646,4838,4851,4853,5079,5090,5156,5310,5594,5604,5629,5916,6262,6469,6647,6789,6899,6943,7026,7040,7042,7046,7048,7124,7157,7262,7291,7422,7472,7474,9464,9645,9935,10019,10155,23513,28982,28996,51804,89780,157506	ACVR1,ADM,AKT1,NKX3-2,BMI1,BMP5,BMP7,BMPR1A,CDX2,CEBPA,NKX2-5,CTNNB1,DVL1,EDN1,EFNA1,EPHA2,EN2,ENG,ERCC1,FOXC1,GLI3,GRB2,HOXA5,HOXA9,NDST1,ID2,ID3,RBPJ,INSIG1,LIF,LRP6,SMAD2,MSX1,MYO6,NODAL,NOTCH1,NOTCH2,PAX5,PBX3,PDGFRA,PKD1,MAPK1,MAP2K1,PROX1,RARG,RYR2,SHH,SOD1,STK4,TBX1,TCF21,NR2F2,TGFB1,TGFB2,TGFBR1,TGFBR2,TNF,TP53,PHLDA2,TWIST1,VEGFA,WNT2,WNT5A,HAND2,MICAL2,MAFB,SH2B3,TRIM28,SCRIB,FLVCR1,HIP…
16_Member	GO Biological Processes	GO:0009952	anterior/posterior pattern specification	-10.7446	-9.39949	43/202	648,650,657,659,1045,1499,2033,2296,2648,2737,2926,3170,3202,3205,3516,3955,4040,4087,4089,4487,4838,4851,5090,5362,5916,6469,6497,6899,6998,7026,7046,7157,7472,7474,7482,7490,7528,7704,7832,10409,23237,28996,89780	BMI1,BMP2,BMPR1A,BMPR2,CDX2,CTNNB1,EP300,FOXC1,KAT2A,GLI3,GRSF1,FOXA2,HOXA5,HOXA9,RBPJ,LFNG,LRP6,SMAD2,SMAD4,MSX1,NODAL,NOTCH1,PBX3,PLXNA2,RARG,SHH,SKI,TBX1,TDGF1P3,NR2F2,TGFBR1,TP53,WNT2,WNT5A,WNT2B,WT1,YY1,ZBTB16,BTG2,BASP1,ARC,HIPK2,WNT3A
16_Member	GO Biological Processes	GO:0045165	cell fate commitment	-10.6538	-9.31323	50/260	90,182,367,387,596,650,657,1499,2247,2475,2627,2737,3170,3175,3209,3398,3516,3569,3570,3662,3688,4086,4087,4089,4090,4170,4838,4851,4853,5371,5468,5629,6469,6774,6899,6934,7026,7046,7157,7472,7474,7482,7490,8829,10919,64919,79577,80326,89780,149233	ACVR1,JAG1,AR,RHOA,BCL2,BMP2,BMPR1A,CTNNB1,FGF2,MTOR,GATA6,GLI3,FOXA2,ONECUT1,HOXA13,ID2,RBPJ,IL6,IL6R,IRF4,ITGB1,SMAD1,SMAD2,SMAD4,SMAD5,MCL1,NODAL,NOTCH1,NOTCH2,PML,PPARG,PROX1,SHH,STAT3,TBX1,TCF7L2,NR2F2,TGFBR1,TP53,WNT2,WNT5A,WNT2B,WT1,NRP1,EHMT2,BCL11B,CDC73,WNT10A,WNT3A,IL23R
16_Member	GO Biological Processes	GO:0007389	pattern specification process	-8.92292	-7.6992	66/439	90,94,162,367,579,648,650,655,657,659,718,1045,1482,1499,1906,2022,2033,2246,2247,2296,2648,2737,2926,3170,3202,3205,3516,3955,4040,4086,4087,4089,4090,4487,4838,4851,4853,5090,5362,5916,6091,6469,6497,6899,6998,7026,7046,7048,7157,7472,7474,7482,7490,7528,7704,7832,8829,9464,9645,9935,10409,10637,23237,28996,89780,199699	ACVR1,ACVRL1,AP1B1,AR,NKX3-2,BMI1,BMP2,BMP7,BMPR1A,BMPR2,C3,CDX2,NKX2-5,CTNNB1,EDN1,ENG,EP300,FGF1,FGF2,FOXC1,KAT2A,GLI3,GRSF1,FOXA2,HOXA5,HOXA9,RBPJ,LFNG,LRP6,SMAD1,SMAD2,SMAD4,SMAD5,MSX1,NODAL,NOTCH1,NOTCH2,PBX3,PLXNA2,RARG,ROBO1,SHH,SKI,TBX1,TDGF1P3,NR2F2,TGFBR1,TGFBR2,TP53,WNT2,WNT5A,WNT2B,WT1,YY1,ZBTB16,BTG2,NRP1,HAND2,MICAL2,MAFB,BASP1,LEFTY1,ARC,HIPK2,WNT3A,DAND5
16_Member	GO Biological Processes	GO:0003002	regionalization	-8.68134	-7.47618	54/331	90,94,367,648,650,657,659,718,1045,1499,1906,2033,2246,2247,2296,2648,2737,2926,3170,3202,3205,3516,3955,4040,4087,4089,4487,4838,4851,4853,5090,5362,5916,6091,6469,6497,6899,6998,7026,7046,7157,7472,7474,7482,7490,7528,7704,7832,8829,9935,10409,23237,28996,89780	ACVR1,ACVRL1,AR,BMI1,BMP2,BMPR1A,BMPR2,C3,CDX2,CTNNB1,EDN1,EP300,FGF1,FGF2,FOXC1,KAT2A,GLI3,GRSF1,FOXA2,HOXA5,HOXA9,RBPJ,LFNG,LRP6,SMAD2,SMAD4,MSX1,NODAL,NOTCH1,NOTCH2,PBX3,PLXNA2,RARG,ROBO1,SHH,SKI,TBX1,TDGF1P3,NR2F2,TGFBR1,TP53,WNT2,WNT5A,WNT2B,WT1,YY1,ZBTB16,BTG2,NRP1,MAFB,BASP1,ARC,HIPK2,WNT3A
16_Member	GO Biological Processes	GO:0048562	embryonic organ morphogenesis	-7.55562	-6.42051	47/290	90,579,648,655,1482,1499,1855,1906,1942,1969,2022,2737,3202,3205,3340,3398,3638,4040,4087,4487,4646,4838,4851,4853,5079,5156,5594,5629,5916,6262,6469,6647,6899,6943,7046,7048,7291,7474,9464,9645,9935,23513,28982,28996,51804,89780,157506	ACVR1,NKX3-2,BMI1,BMP7,NKX2-5,CTNNB1,DVL1,EDN1,EFNA1,EPHA2,ENG,GLI3,HOXA5,HOXA9,NDST1,ID2,INSIG1,LRP6,SMAD2,MSX1,MYO6,NODAL,NOTCH1,NOTCH2,PAX5,PDGFRA,MAPK1,PROX1,RARG,RYR2,SHH,SOD1,TBX1,TCF21,TGFBR1,TGFBR2,TWIST1,WNT5A,HAND2,MICAL2,MAFB,SCRIB,FLVCR1,HIPK2,SIX4,WNT3A,RDH10
17_Summary	GO Biological Processes	GO:0031400	negative regulation of protein modification process	-39.185	-36.3005	130/518	103,104,207,409,578,581,650,655,672,805,808,819,867,1020,1026,1027,1028,1050,1487,1499,1786,1848,1855,2022,2280,2281,2475,2629,2776,2810,2932,3082,3303,3304,3458,3611,3720,4040,4067,4085,4092,4221,4298,4771,4869,5079,5339,5468,5478,5511,5528,5536,5562,5563,5573,5580,5590,5611,5621,5728,5770,5777,5783,5925,6167,6201,6418,6497,6659,7026,7040,7124,7128,7291,7320,7345,7375,7453,7529,7531,7532,8473,88…	ADAR,ADARB1,AKT1,ARRB2,BAK1,BAX,BMP2,BMP7,BRCA1,CALM2,CALM3,CAMLG,CBL,CDK5,CDKN1A,CDKN1B,CDKN1C,CEBPA,CTBP1,CTNNB1,DNMT1,DUSP6,DVL1,ENG,FKBP1A,FKBP1B,MTOR,GBA,GNAQ,SFN,GSK3B,HGF,HSPA1A,HSPA1B,IFNG,ILK,JARID2,LRP6,LYN,MAD2L1,SMAD7,MEN1,MLLT1,NF2,NPM1,PAX5,PLEC,PPARG,PPIA,PPP1R8,PPP2R5D,PPP5C,PRKAA1,PRKAA2,PRKAR1A,PRKCD,PRKCZ,DNAJC3,PRNP,PTEN,PTPN1,PTPN6,PTPN13,RB1,RPL37,RPS7,SET,SKI,SOX4,NR2F2,TGF…
17_Member	GO Biological Processes	GO:0031400	negative regulation of protein modification process	-39.185	-36.3005	130/518	103,104,207,409,578,581,650,655,672,805,808,819,867,1020,1026,1027,1028,1050,1487,1499,1786,1848,1855,2022,2280,2281,2475,2629,2776,2810,2932,3082,3303,3304,3458,3611,3720,4040,4067,4085,4092,4221,4298,4771,4869,5079,5339,5468,5478,5511,5528,5536,5562,5563,5573,5580,5590,5611,5621,5728,5770,5777,5783,5925,6167,6201,6418,6497,6659,7026,7040,7124,7128,7291,7320,7345,7375,7453,7529,7531,7532,8473,88…	ADAR,ADARB1,AKT1,ARRB2,BAK1,BAX,BMP2,BMP7,BRCA1,CALM2,CALM3,CAMLG,CBL,CDK5,CDKN1A,CDKN1B,CDKN1C,CEBPA,CTBP1,CTNNB1,DNMT1,DUSP6,DVL1,ENG,FKBP1A,FKBP1B,MTOR,GBA,GNAQ,SFN,GSK3B,HGF,HSPA1A,HSPA1B,IFNG,ILK,JARID2,LRP6,LYN,MAD2L1,SMAD7,MEN1,MLLT1,NF2,NPM1,PAX5,PLEC,PPARG,PPIA,PPP1R8,PPP2R5D,PPP5C,PRKAA1,PRKAA2,PRKAR1A,PRKCD,PRKCZ,DNAJC3,PRNP,PTEN,PTPN1,PTPN6,PTPN13,RB1,RPL37,RPS7,SET,SKI,SOX4,NR2F2,TGF…
17_Member	GO Biological Processes	GO:0045936	negative regulation of phosphate metabolic process	-33.5923	-30.971	111/441	103,104,142,207,409,578,581,650,655,805,808,867,1026,1027,1028,1050,1848,1855,2022,2280,2281,2475,2629,2776,2810,2932,3082,3170,3458,3611,3624,4040,4067,4092,4221,4298,4771,4869,5339,5465,5468,5478,5511,5528,5536,5573,5580,5590,5611,5621,5728,5770,5777,5783,5925,6521,6774,7026,7040,7042,7124,7128,7157,7291,7320,7345,7453,7529,7531,7532,8660,8850,9043,9370,9530,9555,9961,10019,10114,10217,10221,10…	ADAR,ADARB1,PARP1,AKT1,ARRB2,BAK1,BAX,BMP2,BMP7,CALM2,CALM3,CBL,CDKN1A,CDKN1B,CDKN1C,CEBPA,DUSP6,DVL1,ENG,FKBP1A,FKBP1B,MTOR,GBA,GNAQ,SFN,GSK3B,HGF,FOXA2,IFNG,ILK,INHBA,LRP6,LYN,SMAD7,MEN1,MLLT1,NF2,NPM1,PLEC,PPARA,PPARG,PPIA,PPP1R8,PPP2R5D,PPP5C,PRKAR1A,PRKCD,PRKCZ,DNAJC3,PRNP,PTEN,PTPN1,PTPN6,PTPN13,RB1,SLC4A1,STAT3,NR2F2,TGFB1,TGFB2,TNF,TNFAIP3,TP53,TWIST1,UBE2B,UCHL1,WARS1,YWHAB,YWHAE,YWHAG,I…
17_Member	GO Biological Processes	GO:0010563	negative regulation of phosphorus metabolic process	-33.4957	-30.8899	111/442	103,104,142,207,409,578,581,650,655,805,808,867,1026,1027,1028,1050,1848,1855,2022,2280,2281,2475,2629,2776,2810,2932,3082,3170,3458,3611,3624,4040,4067,4092,4221,4298,4771,4869,5339,5465,5468,5478,5511,5528,5536,5573,5580,5590,5611,5621,5728,5770,5777,5783,5925,6521,6774,7026,7040,7042,7124,7128,7157,7291,7320,7345,7453,7529,7531,7532,8660,8850,9043,9370,9530,9555,9961,10019,10114,10217,10221,10…	ADAR,ADARB1,PARP1,AKT1,ARRB2,BAK1,BAX,BMP2,BMP7,CALM2,CALM3,CBL,CDKN1A,CDKN1B,CDKN1C,CEBPA,DUSP6,DVL1,ENG,FKBP1A,FKBP1B,MTOR,GBA,GNAQ,SFN,GSK3B,HGF,FOXA2,IFNG,ILK,INHBA,LRP6,LYN,SMAD7,MEN1,MLLT1,NF2,NPM1,PLEC,PPARA,PPARG,PPIA,PPP1R8,PPP2R5D,PPP5C,PRKAR1A,PRKCD,PRKCZ,DNAJC3,PRNP,PTEN,PTPN1,PTPN6,PTPN13,RB1,SLC4A1,STAT3,NR2F2,TGFB1,TGFB2,TNF,TNFAIP3,TP53,TWIST1,UBE2B,UCHL1,WARS1,YWHAB,YWHAE,YWHAG,I…
17_Member	GO Biological Processes	GO:1902532	negative regulation of intracellular signal transduction	-32.0915	-29.5427	121/531	27,207,387,409,472,596,599,637,650,655,708,1191,1432,1540,1654,1827,1846,1848,1859,1942,1969,2023,2099,2150,2475,2629,2876,2907,2932,3303,3480,3675,3688,3708,3976,4067,4089,4170,4193,4221,4233,4318,4582,4609,4771,5027,5037,5139,5245,5314,5465,5468,5478,5562,5563,5580,5606,5621,5728,5743,5770,5777,5921,6648,6772,7009,7042,7099,7128,7291,7320,7345,7417,7430,7494,8445,8452,8527,8550,8996,9100,9231,9…	ABL2,AKT1,RHOA,ARRB2,ATM,BCL2,BCL2L2,BID,BMP2,BMP7,C1QBP,CLU,MAPK14,CYLD,DDX3X,RCAN1,DUSP4,DUSP6,DYRK1A,EFNA1,EPHA2,ENO1,ESR1,F2RL1,MTOR,GBA,GPX1,GRINA,GSK3B,HSPA1A,IGF1R,ITGA3,ITGB1,ITPR1,LIF,LYN,SMAD4,MCL1,MDM2,MEN1,MET,MMP9,MUC1,MYC,NF2,P2RX7,PEBP1,PDE3A,PHB,PKHD1,PPARA,PPARG,PPIA,PRKAA1,PRKAA2,PRKCD,MAP2K3,PRNP,PTEN,PTGS2,PTPN1,PTPN6,RASA1,SOD2,STAT1,TMBIM6,TGFB2,TLR4,TNFAIP3,TWIST1,UBE2B,UCH…
17_Member	GO Biological Processes	GO:0042326	negative regulation of phosphorylation	-30.8084	-28.3443	99/385	103,104,207,409,578,581,650,655,805,808,867,1026,1027,1028,1050,1848,1855,2022,2475,2629,2776,2810,3082,3170,3458,3611,3624,4040,4067,4092,4221,4298,4771,4869,5339,5465,5468,5478,5528,5536,5573,5580,5590,5611,5621,5728,5770,5777,5783,5925,6521,6774,7026,7040,7128,7291,7320,7345,7453,7532,8660,8850,9043,9370,9555,9961,10019,10114,10217,10221,10454,10507,10891,10935,11213,11221,11261,23411,23512,23…	ADAR,ADARB1,AKT1,ARRB2,BAK1,BAX,BMP2,BMP7,CALM2,CALM3,CBL,CDKN1A,CDKN1B,CDKN1C,CEBPA,DUSP6,DVL1,ENG,MTOR,GBA,GNAQ,SFN,HGF,FOXA2,IFNG,ILK,INHBA,LRP6,LYN,SMAD7,MEN1,MLLT1,NF2,NPM1,PLEC,PPARA,PPARG,PPIA,PPP2R5D,PPP5C,PRKAR1A,PRKCD,PRKCZ,DNAJC3,PRNP,PTEN,PTPN1,PTPN6,PTPN13,RB1,SLC4A1,STAT3,NR2F2,TGFB1,TNFAIP3,TWIST1,UBE2B,UCHL1,WARS1,YWHAG,IRS2,KAT2B,SPAG9,ADIPOQ,MACROH2A1,MVP,SH2B3,HIPK3,CTDSPL,TRIB…
17_Member	GO Biological Processes	GO:0001933	negative regulation of protein phosphorylation	-28.6496	-26.3112	90/344	103,104,207,409,578,581,650,655,805,808,867,1026,1027,1028,1050,1848,1855,2022,2475,2629,2776,2810,3082,3458,3611,4040,4067,4092,4221,4298,4771,4869,5339,5468,5478,5528,5536,5573,5580,5590,5611,5621,5728,5770,5777,5783,5925,7026,7040,7128,7291,7320,7345,7453,7532,8850,9043,9370,9555,9961,10019,10114,10217,10221,10454,10507,10891,11213,11221,11261,23411,23512,23530,23636,25937,26146,26191,26524,27…	ADAR,ADARB1,AKT1,ARRB2,BAK1,BAX,BMP2,BMP7,CALM2,CALM3,CBL,CDKN1A,CDKN1B,CDKN1C,CEBPA,DUSP6,DVL1,ENG,MTOR,GBA,GNAQ,SFN,HGF,IFNG,ILK,LRP6,LYN,SMAD7,MEN1,MLLT1,NF2,NPM1,PLEC,PPARG,PPIA,PPP2R5D,PPP5C,PRKAR1A,PRKCD,PRKCZ,DNAJC3,PRNP,PTEN,PTPN1,PTPN6,PTPN13,RB1,NR2F2,TGFB1,TNFAIP3,TWIST1,UBE2B,UCHL1,WARS1,YWHAG,KAT2B,SPAG9,ADIPOQ,MACROH2A1,MVP,SH2B3,HIPK3,CTDSPL,TRIB1,TAB1,SEMA4D,PPARGC1A,IRAK3,DUSP10,…
17_Member	GO Biological Processes	GO:0043086	negative regulation of catalytic activity	-24.2095	-22.0731	138/789	103,104,116,207,308,331,332,351,409,650,655,718,720,867,1026,1027,1028,1050,1285,1294,1457,1594,1654,1855,2280,2281,2537,2629,2764,2773,2776,2810,2821,2876,2932,3082,3170,3265,3458,3611,4040,4067,4085,4092,4193,4221,4298,4318,4504,4771,4851,4869,5037,5339,5468,5478,5511,5573,5580,5590,5611,5621,5728,5743,5770,5777,5896,5925,6059,6167,6197,6201,6272,6418,6478,6521,6620,7009,7026,7035,7042,7076,712…	ADAR,ADARB1,ADCYAP1,AKT1,ANXA5,XIAP,BIRC5,APP,ARRB2,BMP2,BMP7,C3,C4A,CBL,CDKN1A,CDKN1B,CDKN1C,CEBPA,COL4A3,COL7A1,CSNK2A1,CYP27B1,DDX3X,DVL1,FKBP1A,FKBP1B,IFI6,GBA,GMFB,GNAI3,GNAQ,SFN,GPI,GPX1,GSK3B,HGF,FOXA2,HRAS,IFNG,ILK,LRP6,LYN,MAD2L1,SMAD7,MDM2,MEN1,MLLT1,MMP9,MT3,NF2,NOTCH1,NPM1,PEBP1,PLEC,PPARG,PPIA,PPP1R8,PRKAR1A,PRKCD,PRKCZ,DNAJC3,PRNP,PTEN,PTGS2,PTPN1,PTPN6,RAG1,RB1,ABCE1,RPL37,RPS6KA3,…
17_Member	GO Biological Processes	GO:0051348	negative regulation of transferase activity	-23.775	-21.6637	72/268	103,104,207,650,655,867,1026,1027,1028,1050,1855,2629,2776,2810,2932,3170,3458,3611,4040,4067,4085,4092,4221,4298,4771,4869,5339,5468,5478,5573,5580,5728,5770,5777,5925,6167,6201,7026,7128,7157,7345,7453,7532,8660,8850,9349,9370,9529,9532,9555,9961,10019,10114,10221,10454,10935,11213,11221,11261,23411,23636,25937,26191,26524,27250,28951,29085,54206,54900,64798,65125,84335	ADAR,ADARB1,AKT1,BMP2,BMP7,CBL,CDKN1A,CDKN1B,CDKN1C,CEBPA,DVL1,GBA,GNAQ,SFN,GSK3B,FOXA2,IFNG,ILK,LRP6,LYN,MAD2L1,SMAD7,MEN1,MLLT1,NF2,NPM1,PLEC,PPARG,PPIA,PRKAR1A,PRKCD,PTEN,PTPN1,PTPN6,RB1,RPL37,RPS7,NR2F2,TNFAIP3,TP53,UCHL1,WARS1,YWHAG,IRS2,KAT2B,RPL23,ADIPOQ,BAG5,BAG2,MACROH2A1,MVP,SH2B3,HIPK3,TRIB1,TAB1,PRDX3,IRAK3,DUSP10,CHP1,SIRT1,NUP62,WWTR1,PTPN22,LATS2,PDCD4,TRIB2,PHPT1,ERRFI1,LAX1,DEPTO…
17_Member	GO Biological Processes	GO:0033673	negative regulation of kinase activity	-20.0138	-18.1023	62/236	103,104,207,650,655,867,1026,1027,1028,1050,1855,2629,2776,2810,3170,3458,3611,4040,4067,4221,4298,4771,4869,5339,5468,5478,5573,5580,5728,5770,5777,5925,7026,7128,7345,7453,7532,8660,8850,9370,9555,9961,10019,10114,10221,10454,10935,11213,11221,11261,23411,23636,25937,26191,26524,27250,28951,54206,54900,64798,65125,84335	ADAR,ADARB1,AKT1,BMP2,BMP7,CBL,CDKN1A,CDKN1B,CDKN1C,CEBPA,DVL1,GBA,GNAQ,SFN,FOXA2,IFNG,ILK,LRP6,LYN,MEN1,MLLT1,NF2,NPM1,PLEC,PPARG,PPIA,PRKAR1A,PRKCD,PTEN,PTPN1,PTPN6,RB1,NR2F2,TNFAIP3,UCHL1,WARS1,YWHAG,IRS2,KAT2B,ADIPOQ,MACROH2A1,MVP,SH2B3,HIPK3,TRIB1,TAB1,PRDX3,IRAK3,DUSP10,CHP1,SIRT1,NUP62,WWTR1,PTPN22,LATS2,PDCD4,TRIB2,ERRFI1,LAX1,DEPTOR,WNK1,AKT1S1
17_Member	GO Biological Processes	GO:0006469	negative regulation of protein kinase activity	-19.5856	-17.701	58/213	103,104,207,650,655,867,1026,1027,1028,1050,1855,2629,2776,2810,3458,3611,4040,4067,4221,4298,4771,4869,5339,5468,5478,5573,5580,5728,5770,5777,5925,7026,7128,7345,7453,7532,8850,9370,9555,9961,10019,10114,10221,10454,11213,11221,11261,23411,23636,25937,26191,26524,27250,28951,54206,54900,64798,84335	ADAR,ADARB1,AKT1,BMP2,BMP7,CBL,CDKN1A,CDKN1B,CDKN1C,CEBPA,DVL1,GBA,GNAQ,SFN,IFNG,ILK,LRP6,LYN,MEN1,MLLT1,NF2,NPM1,PLEC,PPARG,PPIA,PRKAR1A,PRKCD,PTEN,PTPN1,PTPN6,RB1,NR2F2,TNFAIP3,UCHL1,WARS1,YWHAG,KAT2B,ADIPOQ,MACROH2A1,MVP,SH2B3,HIPK3,TRIB1,TAB1,IRAK3,DUSP10,CHP1,SIRT1,NUP62,WWTR1,PTPN22,LATS2,PDCD4,TRIB2,ERRFI1,LAX1,DEPTOR,AKT1S1
17_Member	GO Biological Processes	GO:0043409	negative regulation of MAPK cascade	-12.9886	-11.5054	43/175	207,650,655,1540,1846,1848,1942,2150,2629,3480,3976,4067,4089,4221,4609,4771,5027,5037,5245,5468,5478,5580,5728,5770,5777,7099,7345,7430,9370,10019,10114,10318,11213,11221,23636,26191,27250,54206,54900,83737,171389,284996,406985	AKT1,BMP2,BMP7,CYLD,DUSP4,DUSP6,EFNA1,F2RL1,GBA,IGF1R,LIF,LYN,SMAD4,MEN1,MYC,NF2,P2RX7,PEBP1,PHB,PPARG,PPIA,PRKCD,PTEN,PTPN1,PTPN6,TLR4,UCHL1,EZR,ADIPOQ,SH2B3,HIPK3,TNIP1,IRAK3,DUSP10,NUP62,PTPN22,PDCD4,ERRFI1,LAX1,ITCH,NLRP6,RNF149,MIR200C
17_Member	GO Biological Processes	GO:0071901	negative regulation of protein serine/threonine kinase activity	-12.3159	-10.8727	34/120	207,650,655,1026,1027,1028,1050,2629,4040,4067,4221,5468,5573,5580,5728,5770,5777,5925,7026,7128,7345,8850,9370,9555,10019,10114,11213,11221,23411,23636,26191,26524,27250,54900	AKT1,BMP2,BMP7,CDKN1A,CDKN1B,CDKN1C,CEBPA,GBA,LRP6,LYN,MEN1,PPARG,PRKAR1A,PRKCD,PTEN,PTPN1,PTPN6,RB1,NR2F2,TNFAIP3,UCHL1,KAT2B,ADIPOQ,MACROH2A1,SH2B3,HIPK3,IRAK3,DUSP10,SIRT1,NUP62,PTPN22,LATS2,PDCD4,LAX1
17_Member	GO Biological Processes	GO:0043407	negative regulation of MAP kinase activity	-7.38908	-6.26867	18/59	650,655,2629,4067,5468,5580,5770,5777,7345,9370,10019,10114,11213,11221,23636,26191,27250,54900	BMP2,BMP7,GBA,LYN,PPARG,PRKCD,PTPN1,PTPN6,UCHL1,ADIPOQ,SH2B3,HIPK3,IRAK3,DUSP10,NUP62,PTPN22,PDCD4,LAX1
18_Summary	GO Biological Processes	GO:1901699	cellular response to nitrogen compound	-37.7013	-34.8919	151/692	15,60,142,196,207,351,409,445,490,599,672,760,839,890,999,1019,1020,1141,1277,1278,1282,1307,1385,1499,1616,1660,1785,1786,1906,1958,1979,2058,2230,2241,2309,2316,2358,2475,2529,2551,2642,2697,2773,2776,2885,2889,2902,2932,3274,3416,3456,3479,3480,3484,3638,4061,4062,4067,4149,4193,4221,4504,4641,4869,4914,5027,5139,5142,5156,5286,5294,5295,5313,5468,5562,5580,5590,5594,5621,5728,5743,5770,5781,5…	AANAT,ACTB,PARP1,AHR,AKT1,APP,ARRB2,ASS1,ATP2B1,BCL2L2,BRCA1,CA2,CASP6,CCNA2,CDH1,CDK4,CDK5,CHRNB2,COL1A1,COL1A2,COL4A1,COL16A1,CREB1,CTNNB1,DAXX,DHX9,DNM2,DNMT1,EDN1,EGR1,EIF4EBP2,EPRS1,FDX1,FER,FOXO3,FLNA,FPR2,MTOR,FUT7,GABPA,GCGR,GJA1,GNAI3,GNAQ,GRB2,RAPGEF1,GRIN1,GSK3B,HRH2,IDE,IFNB1,IGF1,IGF1R,IGFBP1,INSIG1,LY6E,LY6H,LYN,MAX,MDM2,MEN1,MT3,MYO1C,NPM1,NTRK1,P2RX7,PDE3A,PDE4B,PDGFRA,PIK3C2A,PIK…
18_Member	GO Biological Processes	GO:1901699	cellular response to nitrogen compound	-37.7013	-34.8919	151/692	15,60,142,196,207,351,409,445,490,599,672,760,839,890,999,1019,1020,1141,1277,1278,1282,1307,1385,1499,1616,1660,1785,1786,1906,1958,1979,2058,2230,2241,2309,2316,2358,2475,2529,2551,2642,2697,2773,2776,2885,2889,2902,2932,3274,3416,3456,3479,3480,3484,3638,4061,4062,4067,4149,4193,4221,4504,4641,4869,4914,5027,5139,5142,5156,5286,5294,5295,5313,5468,5562,5580,5590,5594,5621,5728,5743,5770,5781,5…	AANAT,ACTB,PARP1,AHR,AKT1,APP,ARRB2,ASS1,ATP2B1,BCL2L2,BRCA1,CA2,CASP6,CCNA2,CDH1,CDK4,CDK5,CHRNB2,COL1A1,COL1A2,COL4A1,COL16A1,CREB1,CTNNB1,DAXX,DHX9,DNM2,DNMT1,EDN1,EGR1,EIF4EBP2,EPRS1,FDX1,FER,FOXO3,FLNA,FPR2,MTOR,FUT7,GABPA,GCGR,GJA1,GNAI3,GNAQ,GRB2,RAPGEF1,GRIN1,GSK3B,HRH2,IDE,IFNB1,IGF1,IGF1R,IGFBP1,INSIG1,LY6E,LY6H,LYN,MAX,MDM2,MEN1,MT3,MYO1C,NPM1,NTRK1,P2RX7,PDE3A,PDE4B,PDGFRA,PIK3C2A,PIK…
18_Member	GO Biological Processes	GO:0071417	cellular response to organonitrogen compound	-32.2892	-29.7268	135/637	15,60,142,196,207,351,409,445,490,599,672,760,839,890,999,1019,1020,1277,1278,1282,1307,1385,1499,1785,1786,1906,1958,1979,2058,2230,2241,2309,2316,2358,2475,2529,2551,2642,2697,2773,2885,2889,2902,2932,3274,3416,3479,3480,3484,3638,4067,4149,4193,4221,4641,4914,5027,5139,5142,5156,5286,5294,5295,5313,5468,5562,5580,5590,5594,5621,5728,5743,5770,5781,5908,6262,6464,6506,6517,6647,6667,6715,6720,6…	AANAT,ACTB,PARP1,AHR,AKT1,APP,ARRB2,ASS1,ATP2B1,BCL2L2,BRCA1,CA2,CASP6,CCNA2,CDH1,CDK4,CDK5,COL1A1,COL1A2,COL4A1,COL16A1,CREB1,CTNNB1,DNM2,DNMT1,EDN1,EGR1,EIF4EBP2,EPRS1,FDX1,FER,FOXO3,FLNA,FPR2,MTOR,FUT7,GABPA,GCGR,GJA1,GNAI3,GRB2,RAPGEF1,GRIN1,GSK3B,HRH2,IDE,IGF1,IGF1R,IGFBP1,INSIG1,LYN,MAX,MDM2,MEN1,MYO1C,NTRK1,P2RX7,PDE3A,PDE4B,PDGFRA,PIK3C2A,PIK3CG,PIK3R1,PKLR,PPARG,PRKAA1,PRKCD,PRKCZ,MAPK1,…
18_Member	GO Biological Processes	GO:1901652	response to peptide	-32.1301	-29.5746	118/508	15,133,142,182,207,351,445,490,599,655,694,760,847,890,1019,1020,1027,1277,1385,1432,1490,1906,1958,1979,2058,2069,2241,2309,2358,2475,2529,2642,2650,2697,2885,2902,2932,3291,3416,3479,3480,3484,3638,3727,4040,4067,4149,4193,4221,4318,4641,4831,4851,4914,5286,5295,5313,5465,5468,5562,5580,5590,5621,5728,5743,5770,5781,5908,6272,6464,6517,6667,6678,6715,6720,6772,6773,6774,6777,6814,7049,7071,7076…	AANAT,ADM,PARP1,JAG1,AKT1,APP,ASS1,ATP2B1,BCL2L2,BMP7,BTG1,CA2,CAT,CCNA2,CDK4,CDK5,CDKN1B,COL1A1,CREB1,MAPK14,CCN2,EDN1,EGR1,EIF4EBP2,EPRS1,EREG,FER,FOXO3,FPR2,MTOR,FUT7,GCGR,GCNT1,GJA1,GRB2,GRIN1,GSK3B,HSD11B2,IDE,IGF1,IGF1R,IGFBP1,INSIG1,JUND,LRP6,LYN,MAX,MDM2,MEN1,MMP9,MYO1C,NME2,NOTCH1,NTRK1,PIK3C2A,PIK3R1,PKLR,PPARA,PPARG,PRKAA1,PRKCD,PRKCZ,PRNP,PTEN,PTGS2,PTPN1,PTPN11,RAP1B,SORT1,SHC1,SLC2A…
18_Member	GO Biological Processes	GO:0043434	response to peptide hormone	-23.4808	-21.3886	92/416	15,133,142,207,445,490,655,694,760,847,890,1019,1027,1277,1385,1490,1906,1958,1979,2058,2069,2241,2475,2529,2642,2650,2697,2885,2932,3291,3416,3480,3484,3638,3727,4040,4067,4149,4193,4221,4641,4831,5286,5295,5313,5465,5468,5562,5580,5590,5728,5743,5770,5781,5908,6272,6464,6517,6667,6678,6715,6720,6772,6773,6774,6777,6814,7049,7076,7253,7494,7532,7832,8013,8473,8660,8743,8837,8850,9370,9518,10135,…	AANAT,ADM,PARP1,AKT1,ASS1,ATP2B1,BMP7,BTG1,CA2,CAT,CCNA2,CDK4,CDKN1B,COL1A1,CREB1,CCN2,EDN1,EGR1,EIF4EBP2,EPRS1,EREG,FER,MTOR,FUT7,GCGR,GCNT1,GJA1,GRB2,GSK3B,HSD11B2,IDE,IGF1R,IGFBP1,INSIG1,JUND,LRP6,LYN,MAX,MDM2,MEN1,MYO1C,NME2,PIK3C2A,PIK3R1,PKLR,PPARA,PPARG,PRKAA1,PRKCD,PRKCZ,PTEN,PTGS2,PTPN1,PTPN11,RAP1B,SORT1,SHC1,SLC2A4,SP1,SPARC,SRD5A1,SREBF1,STAT1,STAT2,STAT3,STAT5B,STXBP3,TGFBR3,TIMP1,TS…
18_Member	GO Biological Processes	GO:1901653	cellular response to peptide	-22.2331	-20.2018	83/363	142,207,351,445,490,599,760,890,1019,1020,1385,1906,1979,2058,2241,2309,2358,2529,2642,2697,2885,2902,2932,3416,3479,3480,3484,3638,4067,4149,4193,4221,4641,4914,5286,5295,5313,5468,5562,5580,5590,5621,5728,5770,5781,5908,6464,6517,6667,6715,6720,6772,6774,6777,7071,7099,7157,7253,7412,7431,7494,7532,8013,8473,8660,8837,8850,9349,9370,9518,10018,10135,10333,10365,11132,23235,23411,26191,27131,517…	PARP1,AKT1,APP,ASS1,ATP2B1,BCL2L2,CA2,CCNA2,CDK4,CDK5,CREB1,EDN1,EIF4EBP2,EPRS1,FER,FOXO3,FPR2,FUT7,GCGR,GJA1,GRB2,GRIN1,GSK3B,IDE,IGF1,IGF1R,IGFBP1,INSIG1,LYN,MAX,MDM2,MEN1,MYO1C,NTRK1,PIK3C2A,PIK3R1,PKLR,PPARG,PRKAA1,PRKCD,PRKCZ,PRNP,PTEN,PTPN1,PTPN11,RAP1B,SHC1,SLC2A4,SP1,SRD5A1,SREBF1,STAT1,STAT3,STAT5B,KLF10,TLR4,TP53,TSHR,VCAM1,VIM,XBP1,YWHAG,NR4A3,OGT,IRS2,CFLAR,KAT2B,RPL23,ADIPOQ,GDF15,BC…
18_Member	GO Biological Processes	GO:0032870	cellular response to hormone stimulus	-22.2237	-20.1944	111/588	116,142,207,367,387,445,476,490,648,655,672,678,760,811,890,1019,1385,1616,1906,1956,1977,1979,2033,2058,2099,2241,2309,2353,2529,2627,2642,2697,2885,2932,3416,3480,3484,3624,3638,4067,4149,4193,4221,4504,4641,4838,4851,5241,5245,5286,5295,5313,5465,5468,5536,5562,5563,5580,5590,5618,5728,5770,5781,5908,5916,5978,6464,6517,6667,6715,6720,6772,6774,6777,6943,7035,7067,7253,7357,7490,7494,7532,8013…	ADCYAP1,PARP1,AKT1,AR,RHOA,ASS1,ATP1A1,ATP2B1,BMI1,BMP7,BRCA1,ZFP36L2,CA2,CALR,CCNA2,CDK4,CREB1,DAXX,EDN1,EGFR,EIF4E,EIF4EBP2,EP300,EPRS1,ESR1,FER,FOXO3,FOS,FUT7,GATA6,GCGR,GJA1,GRB2,GSK3B,IDE,IGF1R,IGFBP1,INHBA,INSIG1,LYN,MAX,MDM2,MEN1,MT3,MYO1C,NODAL,NOTCH1,PGR,PHB,PIK3C2A,PIK3R1,PKLR,PPARA,PPARG,PPP5C,PRKAA1,PRKAA2,PRKCD,PRKCZ,PRLR,PTEN,PTPN1,PTPN11,RAP1B,RARG,REST,SHC1,SLC2A4,SP1,SRD5A1,SREBF…
18_Member	GO Biological Processes	GO:0032868	response to insulin	-17.199	-15.4605	62/266	15,133,142,207,490,847,1019,1958,1979,2058,2241,2475,2529,2650,2885,2932,3291,3416,3480,3484,3638,4067,4149,4641,5286,5295,5313,5465,5468,5562,5580,5590,5728,5770,5781,6272,6464,6517,6667,6715,6720,6772,6814,7494,7532,8473,8660,8743,8837,8850,9370,10135,11132,22937,23235,23411,27131,51762,54206,54832,64710,493829	AANAT,ADM,PARP1,AKT1,ATP2B1,CAT,CDK4,EGR1,EIF4EBP2,EPRS1,FER,MTOR,FUT7,GCNT1,GRB2,GSK3B,HSD11B2,IDE,IGF1R,IGFBP1,INSIG1,LYN,MAX,MYO1C,PIK3C2A,PIK3R1,PKLR,PPARA,PPARG,PRKAA1,PRKCD,PRKCZ,PTEN,PTPN1,PTPN11,SORT1,SHC1,SLC2A4,SP1,SRD5A1,SREBF1,STAT1,STXBP3,XBP1,YWHAG,OGT,IRS2,TNFSF10,CFLAR,KAT2B,ADIPOQ,NAMPT,CAPN10,SCAP,SIK2,SIRT1,SNX5,RAB8B,ERRFI1,VPS13C,NUCKS1,TRIM72
18_Member	GO Biological Processes	GO:0071375	cellular response to peptide hormone stimulus	-15.713	-14.078	63/292	142,207,445,490,760,890,1019,1385,1906,1979,2058,2241,2529,2642,2885,2932,3416,3480,3484,3638,4067,4149,4193,4221,4641,5286,5295,5313,5468,5562,5580,5590,5728,5770,5781,5908,6464,6517,6667,6715,6720,6772,6774,6777,7253,7494,7532,8013,8473,8660,8837,8850,9370,9518,10135,11132,23235,23411,27131,51762,54206,64710,493829	PARP1,AKT1,ASS1,ATP2B1,CA2,CCNA2,CDK4,CREB1,EDN1,EIF4EBP2,EPRS1,FER,FUT7,GCGR,GRB2,GSK3B,IDE,IGF1R,IGFBP1,INSIG1,LYN,MAX,MDM2,MEN1,MYO1C,PIK3C2A,PIK3R1,PKLR,PPARG,PRKAA1,PRKCD,PRKCZ,PTEN,PTPN1,PTPN11,RAP1B,SHC1,SLC2A4,SP1,SRD5A1,SREBF1,STAT1,STAT3,STAT5B,TSHR,XBP1,YWHAG,NR4A3,OGT,IRS2,CFLAR,KAT2B,ADIPOQ,GDF15,NAMPT,CAPN10,SIK2,SIRT1,SNX5,RAB8B,ERRFI1,NUCKS1,TRIM72
18_Member	GO Biological Processes	GO:0032869	cellular response to insulin stimulus	-12.9225	-11.4427	47/205	142,207,490,1019,1979,2058,2241,2529,2885,2932,3416,3480,3484,3638,4641,5286,5295,5313,5468,5562,5580,5590,5728,5770,5781,6464,6517,6667,6715,6720,6772,7494,7532,8473,8660,8837,8850,9370,10135,11132,23235,23411,27131,51762,54206,64710,493829	PARP1,AKT1,ATP2B1,CDK4,EIF4EBP2,EPRS1,FER,FUT7,GRB2,GSK3B,IDE,IGF1R,IGFBP1,INSIG1,MYO1C,PIK3C2A,PIK3R1,PKLR,PPARG,PRKAA1,PRKCD,PRKCZ,PTEN,PTPN1,PTPN11,SHC1,SLC2A4,SP1,SRD5A1,SREBF1,STAT1,XBP1,YWHAG,OGT,IRS2,CFLAR,KAT2B,ADIPOQ,NAMPT,CAPN10,SIK2,SIRT1,SNX5,RAB8B,ERRFI1,NUCKS1,TRIM72
18_Member	GO Biological Processes	GO:0008286	insulin receptor signaling pathway	-7.7054	-6.55906	27/118	207,1019,1979,2241,2529,2885,2932,3416,3480,3484,5286,5295,5562,5580,5590,5770,5781,6464,6720,8473,8660,10135,23235,23411,27131,64710,493829	AKT1,CDK4,EIF4EBP2,FER,FUT7,GRB2,GSK3B,IDE,IGF1R,IGFBP1,PIK3C2A,PIK3R1,PRKAA1,PRKCD,PRKCZ,PTPN1,PTPN11,SHC1,SREBF1,OGT,IRS2,NAMPT,SIK2,SIRT1,SNX5,NUCKS1,TRIM72
19_Summary	GO Biological Processes	GO:0030099	myeloid cell differentiation	-37.5437	-34.7502	108/383	103,142,182,211,292,351,760,814,861,920,1021,1050,1054,1385,1432,1435,1499,1777,1969,2033,2113,2150,2309,2353,2475,2551,2629,3146,3148,3202,3205,3276,3303,3304,3398,3458,3516,3624,3662,3696,3725,3930,3976,4067,4090,4318,4609,4627,4831,4850,4853,4891,5196,5293,5295,5316,5371,5468,5613,5777,5781,5814,5916,5925,6194,6208,6521,6772,6774,6777,7037,7040,7048,7049,7067,7071,7098,7099,7124,7422,7704,8546…	ADAR,PARP1,JAG1,ALAS1,SLC25A5,APP,CA2,CAMK4,RUNX1,CD4,CDK6,CEBPA,CEBPG,CREB1,MAPK14,CSF1,CTNNB1,DNASE2,EPHA2,EP300,ETS1,F2RL1,FOXO3,FOS,MTOR,GABPA,GBA,HMGB1,HMGB2,HOXA5,HOXA9,PRMT1,HSPA1A,HSPA1B,ID2,IFNG,RBPJ,INHBA,IRF4,ITGB8,JUN,LBR,LIF,LYN,SMAD5,MMP9,MYC,MYH9,NME2,CNOT4,NOTCH2,SLC11A2,PF4,PIK3CD,PIK3R1,PKNOX1,PML,PPARG,PRKX,PTPN6,PTPN11,PURB,RARG,RB1,RPS6,RPS14,SLC4A1,STAT1,STAT3,STAT5B,TFRC,TG…
19_Member	GO Biological Processes	GO:0030099	myeloid cell differentiation	-37.5437	-34.7502	108/383	103,142,182,211,292,351,760,814,861,920,1021,1050,1054,1385,1432,1435,1499,1777,1969,2033,2113,2150,2309,2353,2475,2551,2629,3146,3148,3202,3205,3276,3303,3304,3398,3458,3516,3624,3662,3696,3725,3930,3976,4067,4090,4318,4609,4627,4831,4850,4853,4891,5196,5293,5295,5316,5371,5468,5613,5777,5781,5814,5916,5925,6194,6208,6521,6772,6774,6777,7037,7040,7048,7049,7067,7071,7098,7099,7124,7422,7704,8546…	ADAR,PARP1,JAG1,ALAS1,SLC25A5,APP,CA2,CAMK4,RUNX1,CD4,CDK6,CEBPA,CEBPG,CREB1,MAPK14,CSF1,CTNNB1,DNASE2,EPHA2,EP300,ETS1,F2RL1,FOXO3,FOS,MTOR,GABPA,GBA,HMGB1,HMGB2,HOXA5,HOXA9,PRMT1,HSPA1A,HSPA1B,ID2,IFNG,RBPJ,INHBA,IRF4,ITGB8,JUN,LBR,LIF,LYN,SMAD5,MMP9,MYC,MYH9,NME2,CNOT4,NOTCH2,SLC11A2,PF4,PIK3CD,PIK3R1,PKNOX1,PML,PPARG,PRKX,PTPN6,PTPN11,PURB,RARG,RB1,RPS6,RPS14,SLC4A1,STAT1,STAT3,STAT5B,TFRC,TG…
19_Member	GO Biological Processes	GO:1903706	regulation of hemopoiesis	-29.5229	-27.1297	95/370	182,387,678,760,814,861,864,920,942,1021,1385,1432,1435,1499,2064,2113,2309,2353,2475,2547,2551,2648,2737,3106,3146,3148,3202,3205,3276,3303,3304,3398,3456,3458,3566,3606,3624,3659,3662,3725,3956,3976,4067,4092,4179,4609,4831,4850,4853,4860,5196,5295,5590,5777,5814,5896,5916,5925,6469,6647,6659,6772,6774,6777,6850,7040,7048,7071,7098,7099,7124,7494,7704,8546,8600,9370,9935,10221,10234,10456,10766…	JAG1,RHOA,ZFP36L2,CA2,CAMK4,RUNX1,RUNX3,CD4,CD86,CDK6,CREB1,MAPK14,CSF1,CTNNB1,ERBB2,ETS1,FOXO3,FOS,MTOR,XRCC6,GABPA,KAT2A,GLI3,HLA-B,HMGB1,HMGB2,HOXA5,HOXA9,PRMT1,HSPA1A,HSPA1B,ID2,IFNB1,IFNG,IL4R,IL18,INHBA,IRF1,IRF4,JUN,LGALS1,LIF,LYN,SMAD7,CD46,MYC,NME2,CNOT4,NOTCH2,PNP,PF4,PIK3R1,PRKCZ,PTPN6,PURB,RAG1,RARG,RB1,SHH,SOD1,SOX4,STAT1,STAT3,STAT5B,SYK,TGFB1,TGFBR2,KLF10,TLR3,TLR4,TNF,XBP1,ZBTB16,…
19_Member	GO Biological Processes	GO:1902105	regulation of leukocyte differentiation	-25.2659	-23.0774	76/281	387,678,760,814,861,864,920,942,1021,1385,1435,1499,2064,2353,2475,2547,2648,2737,3106,3146,3398,3456,3458,3566,3606,3624,3659,3662,3725,3956,3976,4067,4092,4179,4609,4831,4853,4860,5196,5295,5590,5777,5896,5925,6469,6647,6659,6777,6850,7040,7048,7071,7098,7099,7124,7494,7704,8546,8600,9370,9935,10221,10234,10456,10766,10892,11221,22806,22985,27166,54106,57178,79576,80762,133522,149233	RHOA,ZFP36L2,CA2,CAMK4,RUNX1,RUNX3,CD4,CD86,CDK6,CREB1,CSF1,CTNNB1,ERBB2,FOS,MTOR,XRCC6,KAT2A,GLI3,HLA-B,HMGB1,ID2,IFNB1,IFNG,IL4R,IL18,INHBA,IRF1,IRF4,JUN,LGALS1,LIF,LYN,SMAD7,CD46,MYC,NME2,NOTCH2,PNP,PF4,PIK3R1,PRKCZ,PTPN6,RAG1,RB1,SHH,SOD1,SOX4,STAT5B,SYK,TGFB1,TGFBR2,KLF10,TLR3,TLR4,TNF,XBP1,ZBTB16,AP3B1,TNFSF11,ADIPOQ,MAFB,TRIB1,LRRC17,HAX1,TOB2,MALT1,DUSP10,IKZF3,ACIN1,PRELID1,TLR9,ZMIZ1,NK…
19_Member	GO Biological Processes	GO:0002573	myeloid leukocyte differentiation	-21.5169	-19.5372	60/209	142,351,760,814,861,920,1021,1050,1385,1432,1435,1499,1969,2150,2353,2475,2629,3398,3458,3516,3624,3662,3696,3725,3930,3976,4067,4318,4609,4627,4831,4853,5196,5293,5295,5468,5925,7037,7040,7048,7071,7098,7099,7124,7422,8546,8600,9370,9935,10221,10234,10456,10766,22904,22985,23411,80762,84522,133522,149233	PARP1,APP,CA2,CAMK4,RUNX1,CD4,CDK6,CEBPA,CREB1,MAPK14,CSF1,CTNNB1,EPHA2,F2RL1,FOS,MTOR,GBA,ID2,IFNG,RBPJ,INHBA,IRF4,ITGB8,JUN,LBR,LIF,LYN,MMP9,MYC,MYH9,NME2,NOTCH2,PF4,PIK3CD,PIK3R1,PPARG,RB1,TFRC,TGFB1,TGFBR2,KLF10,TLR3,TLR4,TNF,VEGFA,AP3B1,TNFSF11,ADIPOQ,MAFB,TRIB1,LRRC17,HAX1,TOB2,SBNO2,ACIN1,SIRT1,NDFIP1,JAGN1,PPARGC1B,IL23R
19_Member	GO Biological Processes	GO:0045637	regulation of myeloid cell differentiation	-21.284	-19.3185	60/211	182,760,814,861,920,1021,1385,1432,1435,1499,2113,2309,2353,2475,2551,3146,3148,3202,3205,3276,3303,3304,3398,3458,3624,3725,3976,4067,4609,4831,4850,4853,5196,5295,5814,5916,5925,6772,6774,6777,7040,7071,7098,7099,7124,7704,8600,9370,9935,10221,10234,10456,10766,22985,23186,51621,79577,80762,133522,149233	JAG1,CA2,CAMK4,RUNX1,CD4,CDK6,CREB1,MAPK14,CSF1,CTNNB1,ETS1,FOXO3,FOS,MTOR,GABPA,HMGB1,HMGB2,HOXA5,HOXA9,PRMT1,HSPA1A,HSPA1B,ID2,IFNG,INHBA,JUN,LIF,LYN,MYC,NME2,CNOT4,NOTCH2,PF4,PIK3R1,PURB,RARG,RB1,STAT1,STAT3,STAT5B,TGFB1,KLF10,TLR3,TLR4,TNF,ZBTB16,TNFSF11,ADIPOQ,MAFB,TRIB1,LRRC17,HAX1,TOB2,ACIN1,RCOR1,KLF13,CDC73,NDFIP1,PPARGC1B,IL23R
19_Member	GO Biological Processes	GO:1902107	positive regulation of leukocyte differentiation	-17.5677	-15.8124	47/159	387,760,861,864,920,942,1385,1435,2353,2547,2737,3146,3398,3458,3566,3606,3725,3956,3976,4179,4853,4860,5196,5590,5896,5925,6469,6659,6777,6850,7040,7048,7071,7124,7494,7704,8546,8600,10221,10456,10892,11221,22985,57178,79576,133522,149233	RHOA,CA2,RUNX1,RUNX3,CD4,CD86,CREB1,CSF1,FOS,XRCC6,GLI3,HMGB1,ID2,IFNG,IL4R,IL18,JUN,LGALS1,LIF,CD46,NOTCH2,PNP,PF4,PRKCZ,RAG1,RB1,SHH,SOX4,STAT5B,SYK,TGFB1,TGFBR2,KLF10,TNF,XBP1,ZBTB16,AP3B1,TNFSF11,TRIB1,HAX1,MALT1,DUSP10,ACIN1,ZMIZ1,NKAP,PPARGC1B,IL23R
19_Member	GO Biological Processes	GO:1903708	positive regulation of hemopoiesis	-17.5677	-15.8124	47/159	387,760,861,864,920,942,1385,1435,2353,2547,2737,3146,3398,3458,3566,3606,3725,3956,3976,4179,4853,4860,5196,5590,5896,5925,6469,6659,6777,6850,7040,7048,7071,7124,7494,7704,8546,8600,10221,10456,10892,11221,22985,57178,79576,133522,149233	RHOA,CA2,RUNX1,RUNX3,CD4,CD86,CREB1,CSF1,FOS,XRCC6,GLI3,HMGB1,ID2,IFNG,IL4R,IL18,JUN,LGALS1,LIF,CD46,NOTCH2,PNP,PF4,PRKCZ,RAG1,RB1,SHH,SOX4,STAT5B,SYK,TGFB1,TGFBR2,KLF10,TNF,XBP1,ZBTB16,AP3B1,TNFSF11,TRIB1,HAX1,MALT1,DUSP10,ACIN1,ZMIZ1,NKAP,PPARGC1B,IL23R
19_Member	GO Biological Processes	GO:0045639	positive regulation of myeloid cell differentiation	-16.944	-15.2247	37/104	182,760,861,920,1385,1432,1435,2113,2309,2353,3146,3148,3202,3276,3303,3304,3398,3458,3624,3725,3976,4853,5196,5925,6772,6774,6777,7040,7071,7124,8600,10221,10456,22985,23186,133522,149233	JAG1,CA2,RUNX1,CD4,CREB1,MAPK14,CSF1,ETS1,FOXO3,FOS,HMGB1,HMGB2,HOXA5,PRMT1,HSPA1A,HSPA1B,ID2,IFNG,INHBA,JUN,LIF,NOTCH2,PF4,RB1,STAT1,STAT3,STAT5B,TGFB1,KLF10,TNF,TNFSF11,TRIB1,HAX1,ACIN1,RCOR1,PPARGC1B,IL23R
19_Member	GO Biological Processes	GO:0002761	regulation of myeloid leukocyte differentiation	-15.4397	-13.8183	38/120	760,814,861,920,1021,1385,1435,1499,2353,2475,3398,3458,3624,3725,3976,4067,4609,4831,4853,5196,5295,5925,7040,7071,7098,7099,7124,8600,9370,9935,10221,10234,10456,10766,22985,80762,133522,149233	CA2,CAMK4,RUNX1,CD4,CDK6,CREB1,CSF1,CTNNB1,FOS,MTOR,ID2,IFNG,INHBA,JUN,LIF,LYN,MYC,NME2,NOTCH2,PF4,PIK3R1,RB1,TGFB1,KLF10,TLR3,TLR4,TNF,TNFSF11,ADIPOQ,MAFB,TRIB1,LRRC17,HAX1,TOB2,ACIN1,NDFIP1,PPARGC1B,IL23R
19_Member	GO Biological Processes	GO:0002763	positive regulation of myeloid leukocyte differentiation	-10.9991	-9.63651	22/58	760,861,920,1385,1435,2353,3398,3458,3725,3976,4853,5196,5925,7040,7071,7124,8600,10221,10456,22985,133522,149233	CA2,RUNX1,CD4,CREB1,CSF1,FOS,ID2,IFNG,JUN,LIF,NOTCH2,PF4,RB1,TGFB1,KLF10,TNF,TNFSF11,TRIB1,HAX1,ACIN1,PPARGC1B,IL23R
19_Member	GO Biological Processes	GO:0045670	regulation of osteoclast differentiation	-8.34036	-7.15296	20/64	760,814,1385,1435,1499,2353,2475,3458,4853,5295,7071,7098,7099,7124,8600,9935,10234,10766,133522,149233	CA2,CAMK4,CREB1,CSF1,CTNNB1,FOS,MTOR,IFNG,NOTCH2,PIK3R1,KLF10,TLR3,TLR4,TNF,TNFSF11,MAFB,LRRC17,TOB2,PPARGC1B,IL23R
19_Member	GO Biological Processes	GO:0030316	osteoclast differentiation	-7.91166	-6.75135	24/94	760,814,1385,1432,1435,1499,1969,2353,2475,3458,4853,5295,7037,7071,7098,7099,7124,8600,9935,10234,10766,22904,133522,149233	CA2,CAMK4,CREB1,MAPK14,CSF1,CTNNB1,EPHA2,FOS,MTOR,IFNG,NOTCH2,PIK3R1,TFRC,KLF10,TLR3,TLR4,TNF,TNFSF11,MAFB,LRRC17,TOB2,SBNO2,PPARGC1B,IL23R
20_Summary	Reactome Gene Sets	R-HSA-422475	Axon guidance	-37.3655	-34.5835	132/552	27,60,71,387,388,1020,1175,1211,1212,1282,1285,1289,1298,1385,1432,1457,1785,1808,1942,1956,1969,2050,2064,2107,2260,2885,2902,2932,3265,3312,3320,3673,3678,3688,3690,3845,3921,4067,4233,4318,4627,4628,4651,4756,4893,5293,5295,5362,5532,5594,5604,5621,5683,5684,5692,5693,5700,5702,5709,5710,5719,5720,5721,5781,5879,5921,6091,6124,6130,6133,6137,6141,6142,6143,6152,6154,6158,6167,6171,6181,6187,61…	ABL2,ACTB,ACTG1,RHOA,RHOB,CDK5,AP2S1,CLTA,CLTB,COL4A1,COL4A3,COL5A1,COL9A2,CREB1,MAPK14,CSNK2A1,DNM2,DPYSL2,EFNA1,EGFR,EPHA2,EPHB4,ERBB2,ETF1,FGFR1,GRB2,GRIN1,GSK3B,HRAS,HSPA8,HSP90AA1,ITGA2,ITGA5,ITGB1,ITGB3,KRAS,RPSA,LYN,MET,MMP9,MYH9,MYH10,MYO10,NEO1,NRAS,PIK3CD,PIK3R1,PLXNA2,PPP3CB,MAPK1,MAP2K1,PRNP,PSMA2,PSMA3,PSMB4,PSMB5,PSMC1,PSMC3,PSMD3,PSMD4,PSMD13,PSME1,PSME2,PTPN11,RAC1,RASA1,ROBO1,RPL…
20_Member	Reactome Gene Sets	R-HSA-422475	Axon guidance	-37.3655	-34.5835	132/552	27,60,71,387,388,1020,1175,1211,1212,1282,1285,1289,1298,1385,1432,1457,1785,1808,1942,1956,1969,2050,2064,2107,2260,2885,2902,2932,3265,3312,3320,3673,3678,3688,3690,3845,3921,4067,4233,4318,4627,4628,4651,4756,4893,5293,5295,5362,5532,5594,5604,5621,5683,5684,5692,5693,5700,5702,5709,5710,5719,5720,5721,5781,5879,5921,6091,6124,6130,6133,6137,6141,6142,6143,6152,6154,6158,6167,6171,6181,6187,61…	ABL2,ACTB,ACTG1,RHOA,RHOB,CDK5,AP2S1,CLTA,CLTB,COL4A1,COL4A3,COL5A1,COL9A2,CREB1,MAPK14,CSNK2A1,DNM2,DPYSL2,EFNA1,EGFR,EPHA2,EPHB4,ERBB2,ETF1,FGFR1,GRB2,GRIN1,GSK3B,HRAS,HSPA8,HSP90AA1,ITGA2,ITGA5,ITGB1,ITGB3,KRAS,RPSA,LYN,MET,MMP9,MYH9,MYH10,MYO10,NEO1,NRAS,PIK3CD,PIK3R1,PLXNA2,PPP3CB,MAPK1,MAP2K1,PRNP,PSMA2,PSMA3,PSMB4,PSMB5,PSMC1,PSMC3,PSMD3,PSMD4,PSMD13,PSME1,PSME2,PTPN11,RAC1,RASA1,ROBO1,RPL…
20_Member	Reactome Gene Sets	R-HSA-9675108	Nervous system development	-37.1172	-34.3465	135/577	27,60,71,387,388,1020,1175,1211,1212,1282,1285,1289,1298,1385,1432,1457,1785,1808,1942,1956,1969,2050,2064,2107,2260,2885,2902,2932,3265,3312,3320,3673,3678,3688,3690,3845,3921,4067,4233,4318,4627,4628,4651,4756,4893,5293,5295,5362,5532,5594,5604,5621,5683,5684,5692,5693,5700,5702,5709,5710,5719,5720,5721,5781,5879,5921,6091,6124,6130,6133,6137,6141,6142,6143,6152,6154,6158,6167,6171,6181,6187,61…	ABL2,ACTB,ACTG1,RHOA,RHOB,CDK5,AP2S1,CLTA,CLTB,COL4A1,COL4A3,COL5A1,COL9A2,CREB1,MAPK14,CSNK2A1,DNM2,DPYSL2,EFNA1,EGFR,EPHA2,EPHB4,ERBB2,ETF1,FGFR1,GRB2,GRIN1,GSK3B,HRAS,HSPA8,HSP90AA1,ITGA2,ITGA5,ITGB1,ITGB3,KRAS,RPSA,LYN,MET,MMP9,MYH9,MYH10,MYO10,NEO1,NRAS,PIK3CD,PIK3R1,PLXNA2,PPP3CB,MAPK1,MAP2K1,PRNP,PSMA2,PSMA3,PSMB4,PSMB5,PSMC1,PSMC3,PSMD3,PSMD4,PSMD13,PSME1,PSME2,PTPN11,RAC1,RASA1,ROBO1,RPL…
20_Member	Reactome Gene Sets	R-HSA-168255	Influenza Infection	-23.7469	-21.638	54/156	142,811,1211,2926,3303,3304,3320,3836,3837,3838,3839,3840,3921,5434,5435,5441,5611,5901,5903,6124,6130,6133,6137,6141,6142,6143,6152,6154,6158,6167,6171,6181,6187,6189,6194,6201,6202,6206,6208,6210,6222,6228,6229,6233,6234,7040,7311,8021,9045,9349,23521,23636,81929,348995	PARP1,CALR,CLTA,GRSF1,HSPA1A,HSPA1B,HSP90AA1,KPNA1,KPNB1,KPNA2,KPNA3,KPNA4,RPSA,POLR2E,POLR2F,POLR2L,DNAJC3,RAN,RANBP2,RPL4,RPL7A,RPL9,RPL13,RPL18,RPL18A,RPL19,RPL24,RPL26,RPL28,RPL37,RPL41,RPLP2,RPS2,RPS3A,RPS6,RPS7,RPS8,RPS12,RPS14,RPS15A,RPS18,RPS23,RPS24,RPS27A,RPS28,TGFB1,UBA52,NUP214,RPL14,RPL23,RPL13A,NUP62,SEH1L,NUP43
20_Member	Reactome Gene Sets	R-HSA-8953854	Metabolism of RNA	-21.8021	-19.8077	120/673	103,104,207,705,1432,1660,1665,1973,1975,1977,2058,2091,2107,2521,2966,3191,3303,3304,3312,3842,3921,4850,4904,5434,5435,5441,5580,5683,5684,5692,5693,5700,5702,5709,5710,5719,5720,5721,5725,5822,5901,5903,6124,6130,6133,6137,6141,6142,6143,6152,6154,6158,6167,6171,6181,6187,6189,6194,6201,6202,6206,6208,6210,6222,6228,6229,6233,6234,6418,6499,6632,6633,6634,7311,7314,7316,7529,7534,8021,8570,873…	ADAR,ADARB1,AKT1,BYSL,MAPK14,DHX9,DHX15,EIF4A1,EIF4B,EIF4E,EPRS1,FBL,ETF1,FUS,GTF2H2,HNRNPL,HSPA1A,HSPA1B,HSPA8,TNPO1,RPSA,CNOT4,YBX1,POLR2E,POLR2F,POLR2L,PRKCD,PSMA2,PSMA3,PSMB4,PSMB5,PSMC1,PSMC3,PSMD3,PSMD4,PSMD13,PSME1,PSME2,PTBP1,PWP2,RAN,RANBP2,RPL4,RPL7A,RPL9,RPL13,RPL18,RPL18A,RPL19,RPL24,RPL26,RPL28,RPL37,RPL41,RPLP2,RPS2,RPS3A,RPS6,RPS7,RPS8,RPS12,RPS14,RPS15A,RPS18,RPS23,RPS24,RPS27A,RP…
20_Member	CORUM	CORUM:3055	Nop56p-associated pre-rRNA complex	-21.6178	-19.6308	42/104	292,1660,1915,1938,2091,3608,3609,4869,4904,6124,6130,6133,6137,6141,6142,6143,6152,6154,6158,6181,6187,6189,6194,6201,6202,6206,6208,6210,6222,6228,6229,6732,7846,8971,9045,9221,9349,10642,11338,23521,26156,51631	SLC25A5,DHX9,EEF1A1,EEF2,FBL,ILF2,ILF3,NPM1,YBX1,RPL4,RPL7A,RPL9,RPL13,RPL18,RPL18A,RPL19,RPL24,RPL26,RPL28,RPLP2,RPS2,RPS3A,RPS6,RPS7,RPS8,RPS12,RPS14,RPS15A,RPS18,RPS23,RPS24,SRPK1,TUBA1A,H1-10,RPL14,NOLC1,RPL23,IGF2BP1,U2AF2,RPL13A,RSL1D1,LUC7L2
20_Member	Reactome Gene Sets	R-HSA-168273	Influenza Viral RNA Transcription and Replication	-17.4851	-15.7362	43/135	142,2926,3320,3921,5434,5435,5441,5611,5903,6124,6130,6133,6137,6141,6142,6143,6152,6154,6158,6167,6171,6181,6187,6189,6194,6201,6202,6206,6208,6210,6222,6228,6229,6233,6234,7311,8021,9045,9349,23521,23636,81929,348995	PARP1,GRSF1,HSP90AA1,RPSA,POLR2E,POLR2F,POLR2L,DNAJC3,RANBP2,RPL4,RPL7A,RPL9,RPL13,RPL18,RPL18A,RPL19,RPL24,RPL26,RPL28,RPL37,RPL41,RPLP2,RPS2,RPS3A,RPS6,RPS7,RPS8,RPS12,RPS14,RPS15A,RPS18,RPS23,RPS24,RPS27A,RPS28,UBA52,NUP214,RPL14,RPL23,RPL13A,NUP62,SEH1L,NUP43
20_Member	Reactome Gene Sets	R-HSA-9010553	Regulation of expression of SLITs and ROBOs	-16.9122	-15.195	48/171	2107,3921,5683,5684,5692,5693,5700,5702,5709,5710,5719,5720,5721,6091,6124,6130,6133,6137,6141,6142,6143,6152,6154,6158,6167,6171,6181,6187,6189,6194,6201,6202,6206,6208,6210,6222,6228,6229,6233,6234,7311,7314,7316,9045,9349,10921,23521,26986	ETF1,RPSA,PSMA2,PSMA3,PSMB4,PSMB5,PSMC1,PSMC3,PSMD3,PSMD4,PSMD13,PSME1,PSME2,ROBO1,RPL4,RPL7A,RPL9,RPL13,RPL18,RPL18A,RPL19,RPL24,RPL26,RPL28,RPL37,RPL41,RPLP2,RPS2,RPS3A,RPS6,RPS7,RPS8,RPS12,RPS14,RPS15A,RPS18,RPS23,RPS24,RPS27A,RPS28,UBA52,UBB,UBC,RPL14,RPL23,RNPS1,RPL13A,PABPC1
20_Member	Reactome Gene Sets	R-HSA-72613	Eukaryotic Translation Initiation	-16.4042	-14.7137	39/119	1968,1973,1975,1977,1978,1983,3921,6124,6130,6133,6137,6141,6142,6143,6152,6154,6158,6167,6171,6181,6187,6189,6194,6201,6202,6206,6208,6210,6222,6228,6229,6233,6234,7311,8894,9045,9349,23521,26986	EIF2S3,EIF4A1,EIF4B,EIF4E,EIF4EBP1,EIF5,RPSA,RPL4,RPL7A,RPL9,RPL13,RPL18,RPL18A,RPL19,RPL24,RPL26,RPL28,RPL37,RPL41,RPLP2,RPS2,RPS3A,RPS6,RPS7,RPS8,RPS12,RPS14,RPS15A,RPS18,RPS23,RPS24,RPS27A,RPS28,UBA52,EIF2S2,RPL14,RPL23,RPL13A,PABPC1
20_Member	Reactome Gene Sets	R-HSA-72737	Cap-dependent Translation Initiation	-16.4042	-14.7137	39/119	1968,1973,1975,1977,1978,1983,3921,6124,6130,6133,6137,6141,6142,6143,6152,6154,6158,6167,6171,6181,6187,6189,6194,6201,6202,6206,6208,6210,6222,6228,6229,6233,6234,7311,8894,9045,9349,23521,26986	EIF2S3,EIF4A1,EIF4B,EIF4E,EIF4EBP1,EIF5,RPSA,RPL4,RPL7A,RPL9,RPL13,RPL18,RPL18A,RPL19,RPL24,RPL26,RPL28,RPL37,RPL41,RPLP2,RPS2,RPS3A,RPS6,RPS7,RPS8,RPS12,RPS14,RPS15A,RPS18,RPS23,RPS24,RPS27A,RPS28,UBA52,EIF2S2,RPL14,RPL23,RPL13A,PABPC1
20_Member	Reactome Gene Sets	R-HSA-376176	Signaling by ROBO receptors	-16.2951	-14.611	54/218	27,387,2107,3921,5532,5683,5684,5692,5693,5700,5702,5709,5710,5719,5720,5721,5879,6091,6124,6130,6133,6137,6141,6142,6143,6152,6154,6158,6167,6171,6181,6187,6189,6194,6201,6202,6206,6208,6210,6222,6228,6229,6233,6234,7311,7314,7316,8829,9045,9349,10921,23521,26986,51466	ABL2,RHOA,ETF1,RPSA,PPP3CB,PSMA2,PSMA3,PSMB4,PSMB5,PSMC1,PSMC3,PSMD3,PSMD4,PSMD13,PSME1,PSME2,RAC1,ROBO1,RPL4,RPL7A,RPL9,RPL13,RPL18,RPL18A,RPL19,RPL24,RPL26,RPL28,RPL37,RPL41,RPLP2,RPS2,RPS3A,RPS6,RPS7,RPS8,RPS12,RPS14,RPS15A,RPS18,RPS23,RPS24,RPS27A,RPS28,UBA52,UBB,UBC,NRP1,RPL14,RPL23,RNPS1,RPL13A,PABPC1,EVL
20_Member	Reactome Gene Sets	R-HSA-156842	Eukaryotic Translation Elongation	-16.0477	-14.3824	34/93	1915,1933,1938,3921,6124,6130,6133,6137,6141,6142,6143,6152,6154,6158,6167,6171,6181,6187,6189,6194,6201,6202,6206,6208,6210,6222,6228,6229,6233,6234,7311,9045,9349,23521	EEF1A1,EEF1B2,EEF2,RPSA,RPL4,RPL7A,RPL9,RPL13,RPL18,RPL18A,RPL19,RPL24,RPL26,RPL28,RPL37,RPL41,RPLP2,RPS2,RPS3A,RPS6,RPS7,RPS8,RPS12,RPS14,RPS15A,RPS18,RPS23,RPS24,RPS27A,RPS28,UBA52,RPL14,RPL23,RPL13A
20_Member	Reactome Gene Sets	R-HSA-156827	L13a-mediated translational silencing of Ceruloplasmin expression	-15.8728	-14.2212	37/111	1968,1973,1975,1977,3921,6124,6130,6133,6137,6141,6142,6143,6152,6154,6158,6167,6171,6181,6187,6189,6194,6201,6202,6206,6208,6210,6222,6228,6229,6233,6234,7311,8894,9045,9349,23521,26986	EIF2S3,EIF4A1,EIF4B,EIF4E,RPSA,RPL4,RPL7A,RPL9,RPL13,RPL18,RPL18A,RPL19,RPL24,RPL26,RPL28,RPL37,RPL41,RPLP2,RPS2,RPS3A,RPS6,RPS7,RPS8,RPS12,RPS14,RPS15A,RPS18,RPS23,RPS24,RPS27A,RPS28,UBA52,EIF2S2,RPL14,RPL23,RPL13A,PABPC1
20_Member	GO Biological Processes	GO:0002181	cytoplasmic translation	-15.8271	-14.1789	43/148	1660,1938,1968,1973,1975,1983,2107,2475,3921,6124,6130,6133,6137,6141,6142,6143,6152,6154,6158,6167,6171,6181,6187,6189,6194,6201,6202,6206,6208,6210,6222,6228,6229,6233,6234,7311,7555,8894,9045,9349,23521,28985,80315	DHX9,EEF2,EIF2S3,EIF4A1,EIF4B,EIF5,ETF1,MTOR,RPSA,RPL4,RPL7A,RPL9,RPL13,RPL18,RPL18A,RPL19,RPL24,RPL26,RPL28,RPL37,RPL41,RPLP2,RPS2,RPS3A,RPS6,RPS7,RPS8,RPS12,RPS14,RPS15A,RPS18,RPS23,RPS24,RPS27A,RPS28,UBA52,CNBP,EIF2S2,RPL14,RPL23,RPL13A,MCTS1,CPEB4
20_Member	Reactome Gene Sets	R-HSA-156902	Peptide chain elongation	-15.8099	-14.165	33/89	1915,1938,3921,6124,6130,6133,6137,6141,6142,6143,6152,6154,6158,6167,6171,6181,6187,6189,6194,6201,6202,6206,6208,6210,6222,6228,6229,6233,6234,7311,9045,9349,23521	EEF1A1,EEF2,RPSA,RPL4,RPL7A,RPL9,RPL13,RPL18,RPL18A,RPL19,RPL24,RPL26,RPL28,RPL37,RPL41,RPLP2,RPS2,RPS3A,RPS6,RPS7,RPS8,RPS12,RPS14,RPS15A,RPS18,RPS23,RPS24,RPS27A,RPS28,UBA52,RPL14,RPL23,RPL13A
20_Member	Reactome Gene Sets	R-HSA-192823	Viral mRNA Translation	-15.8099	-14.165	33/89	2926,3921,5611,6124,6130,6133,6137,6141,6142,6143,6152,6154,6158,6167,6171,6181,6187,6189,6194,6201,6202,6206,6208,6210,6222,6228,6229,6233,6234,7311,9045,9349,23521	GRSF1,RPSA,DNAJC3,RPL4,RPL7A,RPL9,RPL13,RPL18,RPL18A,RPL19,RPL24,RPL26,RPL28,RPL37,RPL41,RPLP2,RPS2,RPS3A,RPS6,RPS7,RPS8,RPS12,RPS14,RPS15A,RPS18,RPS23,RPS24,RPS27A,RPS28,UBA52,RPL14,RPL23,RPL13A
20_Member	Reactome Gene Sets	R-HSA-72706	GTP hydrolysis and joining of the 60S ribosomal subunit	-15.7278	-14.0896	37/112	1968,1973,1975,1977,1983,3921,6124,6130,6133,6137,6141,6142,6143,6152,6154,6158,6167,6171,6181,6187,6189,6194,6201,6202,6206,6208,6210,6222,6228,6229,6233,6234,7311,8894,9045,9349,23521	EIF2S3,EIF4A1,EIF4B,EIF4E,EIF5,RPSA,RPL4,RPL7A,RPL9,RPL13,RPL18,RPL18A,RPL19,RPL24,RPL26,RPL28,RPL37,RPL41,RPLP2,RPS2,RPS3A,RPS6,RPS7,RPS8,RPS12,RPS14,RPS15A,RPS18,RPS23,RPS24,RPS27A,RPS28,UBA52,EIF2S2,RPL14,RPL23,RPL13A
20_Member	Reactome Gene Sets	R-HSA-2408522	Selenoamino acid metabolism	-15.7136	-14.078	38/118	1615,2058,2936,3176,3735,3921,6124,6130,6133,6137,6141,6142,6143,6152,6154,6158,6167,6171,6181,6187,6189,6194,6201,6202,6206,6208,6210,6222,6228,6229,6233,6234,6301,7311,9045,9349,23521,51520	DARS1,EPRS1,GSR,HNMT,KARS1,RPSA,RPL4,RPL7A,RPL9,RPL13,RPL18,RPL18A,RPL19,RPL24,RPL26,RPL28,RPL37,RPL41,RPLP2,RPS2,RPS3A,RPS6,RPS7,RPS8,RPS12,RPS14,RPS15A,RPS18,RPS23,RPS24,RPS27A,RPS28,SARS1,UBA52,RPL14,RPL23,RPL13A,LARS1
20_Member	CORUM	CORUM:306	Ribosome, cytoplasmic	-15.5294	-13.8977	31/80	3921,6124,6130,6133,6137,6141,6142,6143,6152,6154,6158,6167,6171,6181,6187,6189,6194,6201,6202,6206,6208,6210,6222,6228,6229,6233,6234,7311,9045,9349,23521	RPSA,RPL4,RPL7A,RPL9,RPL13,RPL18,RPL18A,RPL19,RPL24,RPL26,RPL28,RPL37,RPL41,RPLP2,RPS2,RPS3A,RPS6,RPS7,RPS8,RPS12,RPS14,RPS15A,RPS18,RPS23,RPS24,RPS27A,RPS28,UBA52,RPL14,RPL23,RPL13A
20_Member	Reactome Gene Sets	R-HSA-975956	Nonsense Mediated Decay (NMD) independent of the Exon Junction Complex (EJC)	-14.8346	-13.2503	33/95	2107,3921,6124,6130,6133,6137,6141,6142,6143,6152,6154,6158,6167,6171,6181,6187,6189,6194,6201,6202,6206,6208,6210,6222,6228,6229,6233,6234,7311,9045,9349,23521,26986	ETF1,RPSA,RPL4,RPL7A,RPL9,RPL13,RPL18,RPL18A,RPL19,RPL24,RPL26,RPL28,RPL37,RPL41,RPLP2,RPS2,RPS3A,RPS6,RPS7,RPS8,RPS12,RPS14,RPS15A,RPS18,RPS23,RPS24,RPS27A,RPS28,UBA52,RPL14,RPL23,RPL13A,PABPC1
20_Member	Reactome Gene Sets	R-HSA-9633012	Response of EIF2AK4 (GCN2) to amino acid deficiency	-14.7902	-13.2109	34/101	1054,1968,3921,6124,6130,6133,6137,6141,6142,6143,6152,6154,6158,6167,6171,6181,6187,6189,6194,6201,6202,6206,6208,6210,6222,6228,6229,6233,6234,7311,8894,9045,9349,23521	CEBPG,EIF2S3,RPSA,RPL4,RPL7A,RPL9,RPL13,RPL18,RPL18A,RPL19,RPL24,RPL26,RPL28,RPL37,RPL41,RPLP2,RPS2,RPS3A,RPS6,RPS7,RPS8,RPS12,RPS14,RPS15A,RPS18,RPS23,RPS24,RPS27A,RPS28,UBA52,EIF2S2,RPL14,RPL23,RPL13A
20_Member	WikiPathways	WP477	Cytoplasmic ribosomal proteins	-14.7407	-13.1643	32/90	3921,6124,6130,6133,6137,6141,6142,6143,6152,6154,6158,6167,6171,6181,6187,6189,6194,6197,6201,6202,6206,6208,6210,6222,6228,6229,6233,6234,7311,9045,9349,23521	RPSA,RPL4,RPL7A,RPL9,RPL13,RPL18,RPL18A,RPL19,RPL24,RPL26,RPL28,RPL37,RPL41,RPLP2,RPS2,RPS3A,RPS6,RPS6KA3,RPS7,RPS8,RPS12,RPS14,RPS15A,RPS18,RPS23,RPS24,RPS27A,RPS28,UBA52,RPL14,RPL23,RPL13A
20_Member	Reactome Gene Sets	R-HSA-2408557	Selenocysteine synthesis	-14.2712	-12.715	32/93	3921,6124,6130,6133,6137,6141,6142,6143,6152,6154,6158,6167,6171,6181,6187,6189,6194,6201,6202,6206,6208,6210,6222,6228,6229,6233,6234,6301,7311,9045,9349,23521	RPSA,RPL4,RPL7A,RPL9,RPL13,RPL18,RPL18A,RPL19,RPL24,RPL26,RPL28,RPL37,RPL41,RPLP2,RPS2,RPS3A,RPS6,RPS7,RPS8,RPS12,RPS14,RPS15A,RPS18,RPS23,RPS24,RPS27A,RPS28,SARS1,UBA52,RPL14,RPL23,RPL13A
20_Member	Reactome Gene Sets	R-HSA-72764	Eukaryotic Translation Termination	-14.2712	-12.715	32/93	2107,3921,6124,6130,6133,6137,6141,6142,6143,6152,6154,6158,6167,6171,6181,6187,6189,6194,6201,6202,6206,6208,6210,6222,6228,6229,6233,6234,7311,9045,9349,23521	ETF1,RPSA,RPL4,RPL7A,RPL9,RPL13,RPL18,RPL18A,RPL19,RPL24,RPL26,RPL28,RPL37,RPL41,RPLP2,RPS2,RPS3A,RPS6,RPS7,RPS8,RPS12,RPS14,RPS15A,RPS18,RPS23,RPS24,RPS27A,RPS28,UBA52,RPL14,RPL23,RPL13A
20_Member	Reactome Gene Sets	R-HSA-927802	Nonsense-Mediated Decay (NMD)	-13.6893	-12.162	35/115	2107,3921,6124,6130,6133,6137,6141,6142,6143,6152,6154,6158,6167,6171,6181,6187,6189,6194,6201,6202,6206,6208,6210,6222,6228,6229,6233,6234,7311,9045,9349,10921,23521,26986,55629	ETF1,RPSA,RPL4,RPL7A,RPL9,RPL13,RPL18,RPL18A,RPL19,RPL24,RPL26,RPL28,RPL37,RPL41,RPLP2,RPS2,RPS3A,RPS6,RPS7,RPS8,RPS12,RPS14,RPS15A,RPS18,RPS23,RPS24,RPS27A,RPS28,UBA52,RPL14,RPL23,RNPS1,RPL13A,PABPC1,PNRC2
20_Member	Reactome Gene Sets	R-HSA-975957	Nonsense Mediated Decay (NMD) enhanced by the Exon Junction Complex (EJC)	-13.6893	-12.162	35/115	2107,3921,6124,6130,6133,6137,6141,6142,6143,6152,6154,6158,6167,6171,6181,6187,6189,6194,6201,6202,6206,6208,6210,6222,6228,6229,6233,6234,7311,9045,9349,10921,23521,26986,55629	ETF1,RPSA,RPL4,RPL7A,RPL9,RPL13,RPL18,RPL18A,RPL19,RPL24,RPL26,RPL28,RPL37,RPL41,RPLP2,RPS2,RPS3A,RPS6,RPS7,RPS8,RPS12,RPS14,RPS15A,RPS18,RPS23,RPS24,RPS27A,RPS28,UBA52,RPL14,RPL23,RNPS1,RPL13A,PABPC1,PNRC2
20_Member	Reactome Gene Sets	R-HSA-1799339	SRP-dependent cotranslational protein targeting to membrane	-12.5028	-11.0518	33/112	3921,6124,6130,6133,6137,6141,6142,6143,6152,6154,6158,6167,6171,6181,6187,6189,6194,6201,6202,6206,6208,6210,6222,6228,6229,6233,6234,6730,6747,7311,9045,9349,23521	RPSA,RPL4,RPL7A,RPL9,RPL13,RPL18,RPL18A,RPL19,RPL24,RPL26,RPL28,RPL37,RPL41,RPLP2,RPS2,RPS3A,RPS6,RPS7,RPS8,RPS12,RPS14,RPS15A,RPS18,RPS23,RPS24,RPS27A,RPS28,SRP68,SSR3,UBA52,RPL14,RPL23,RPL13A
20_Member	Reactome Gene Sets	R-HSA-72766	Translation	-12.3938	-10.9475	57/291	1615,1915,1933,1938,1968,1973,1975,1977,1978,1983,2058,2107,3735,3921,4677,6124,6130,6133,6137,6141,6142,6143,6152,6154,6158,6167,6171,6181,6183,6187,6189,6194,6201,6202,6206,6208,6210,6222,6228,6229,6233,6234,6301,6730,6747,7311,7453,8894,9045,9349,23521,26986,51520,51649,54998,55173,64981	DARS1,EEF1A1,EEF1B2,EEF2,EIF2S3,EIF4A1,EIF4B,EIF4E,EIF4EBP1,EIF5,EPRS1,ETF1,KARS1,RPSA,NARS1,RPL4,RPL7A,RPL9,RPL13,RPL18,RPL18A,RPL19,RPL24,RPL26,RPL28,RPL37,RPL41,RPLP2,MRPS12,RPS2,RPS3A,RPS6,RPS7,RPS8,RPS12,RPS14,RPS15A,RPS18,RPS23,RPS24,RPS27A,RPS28,SARS1,SRP68,SSR3,UBA52,WARS1,EIF2S2,RPL14,RPL23,RPL13A,PABPC1,LARS1,MRPS23,AURKAIP1,MRPS10,MRPL34
20_Member	Reactome Gene Sets	R-HSA-72689	Formation of a pool of free 40S subunits	-12.316	-10.8727	31/101	3921,6124,6130,6133,6137,6141,6142,6143,6152,6154,6158,6167,6171,6181,6187,6189,6194,6201,6202,6206,6208,6210,6222,6228,6229,6233,6234,7311,9045,9349,23521	RPSA,RPL4,RPL7A,RPL9,RPL13,RPL18,RPL18A,RPL19,RPL24,RPL26,RPL28,RPL37,RPL41,RPLP2,RPS2,RPS3A,RPS6,RPS7,RPS8,RPS12,RPS14,RPS15A,RPS18,RPS23,RPS24,RPS27A,RPS28,UBA52,RPL14,RPL23,RPL13A
20_Member	Reactome Gene Sets	R-HSA-9711097	Cellular response to starvation	-12.1029	-10.6711	39/156	528,1054,1968,2475,3921,6124,6130,6133,6137,6141,6142,6143,6152,6154,6158,6167,6171,6181,6187,6189,6194,6201,6202,6206,6208,6210,6222,6228,6229,6233,6234,7311,8894,9045,9349,23521,58528,64121,81929	ATP6V1C1,CEBPG,EIF2S3,MTOR,RPSA,RPL4,RPL7A,RPL9,RPL13,RPL18,RPL18A,RPL19,RPL24,RPL26,RPL28,RPL37,RPL41,RPLP2,RPS2,RPS3A,RPS6,RPS7,RPS8,RPS12,RPS14,RPS15A,RPS18,RPS23,RPS24,RPS27A,RPS28,UBA52,EIF2S2,RPL14,RPL23,RPL13A,RRAGD,RRAGC,SEH1L
20_Member	Reactome Gene Sets	R-HSA-6791226	Major pathway of rRNA processing in the nucleolus and cytosol	-10.9418	-9.58309	41/184	705,2091,3921,5822,6124,6130,6133,6137,6141,6142,6143,6152,6154,6158,6167,6171,6181,6187,6189,6194,6201,6202,6206,6208,6210,6222,6228,6229,6233,6234,7311,9045,9349,10436,10438,22803,23521,25926,55272,55813,81875	BYSL,FBL,RPSA,PWP2,RPL4,RPL7A,RPL9,RPL13,RPL18,RPL18A,RPL19,RPL24,RPL26,RPL28,RPL37,RPL41,RPLP2,RPS2,RPS3A,RPS6,RPS7,RPS8,RPS12,RPS14,RPS15A,RPS18,RPS23,RPS24,RPS27A,RPS28,UBA52,RPL14,RPL23,EMG1,C1D,XRN2,RPL13A,NOL11,IMP3,UTP6,ISG20L2
20_Member	Reactome Gene Sets	R-HSA-8868773	rRNA processing in the nucleus and cytosol	-10.1748	-8.86504	41/194	705,2091,3921,5822,6124,6130,6133,6137,6141,6142,6143,6152,6154,6158,6167,6171,6181,6187,6189,6194,6201,6202,6206,6208,6210,6222,6228,6229,6233,6234,7311,9045,9349,10436,10438,22803,23521,25926,55272,55813,81875	BYSL,FBL,RPSA,PWP2,RPL4,RPL7A,RPL9,RPL13,RPL18,RPL18A,RPL19,RPL24,RPL26,RPL28,RPL37,RPL41,RPLP2,RPS2,RPS3A,RPS6,RPS7,RPS8,RPS12,RPS14,RPS15A,RPS18,RPS23,RPS24,RPS27A,RPS28,UBA52,RPL14,RPL23,EMG1,C1D,XRN2,RPL13A,NOL11,IMP3,UTP6,ISG20L2
20_Member	Reactome Gene Sets	R-HSA-72662	Activation of the mRNA upon binding of the cap-binding complex and eIFs, and subsequent binding to 43S	-9.91864	-8.62844	21/59	1968,1973,1975,1977,1978,3921,6187,6189,6194,6201,6202,6206,6208,6210,6222,6228,6229,6233,6234,8894,26986	EIF2S3,EIF4A1,EIF4B,EIF4E,EIF4EBP1,RPSA,RPS2,RPS3A,RPS6,RPS7,RPS8,RPS12,RPS14,RPS15A,RPS18,RPS23,RPS24,RPS27A,RPS28,EIF2S2,PABPC1
20_Member	Reactome Gene Sets	R-HSA-71291	Metabolism of amino acids and derivatives	-9.71244	-8.43423	61/374	15,262,445,1615,2058,2628,2936,3176,3735,3921,4329,5683,5684,5692,5693,5700,5702,5709,5710,5719,5720,5721,6124,6130,6133,6137,6141,6142,6143,6152,6154,6158,6167,6171,6181,6187,6189,6194,6201,6202,6206,6208,6210,6222,6228,6229,6233,6234,6301,6470,7252,7311,8050,8140,9045,9349,10955,11019,23521,51520,63826	AANAT,AMD1,ASS1,DARS1,EPRS1,GATM,GSR,HNMT,KARS1,RPSA,ALDH6A1,PSMA2,PSMA3,PSMB4,PSMB5,PSMC1,PSMC3,PSMD3,PSMD4,PSMD13,PSME1,PSME2,RPL4,RPL7A,RPL9,RPL13,RPL18,RPL18A,RPL19,RPL24,RPL26,RPL28,RPL37,RPL41,RPLP2,RPS2,RPS3A,RPS6,RPS7,RPS8,RPS12,RPS14,RPS15A,RPS18,RPS23,RPS24,RPS27A,RPS28,SARS1,SHMT1,TSHB,UBA52,PDHX,SLC7A5,RPL14,RPL23,SERINC3,LIAS,RPL13A,LARS1,SRR
20_Member	Reactome Gene Sets	R-HSA-72312	rRNA processing	-9.46753	-8.20585	41/204	705,2091,3921,5822,6124,6130,6133,6137,6141,6142,6143,6152,6154,6158,6167,6171,6181,6187,6189,6194,6201,6202,6206,6208,6210,6222,6228,6229,6233,6234,7311,9045,9349,10436,10438,22803,23521,25926,55272,55813,81875	BYSL,FBL,RPSA,PWP2,RPL4,RPL7A,RPL9,RPL13,RPL18,RPL18A,RPL19,RPL24,RPL26,RPL28,RPL37,RPL41,RPLP2,RPS2,RPS3A,RPS6,RPS7,RPS8,RPS12,RPS14,RPS15A,RPS18,RPS23,RPS24,RPS27A,RPS28,UBA52,RPL14,RPL23,EMG1,C1D,XRN2,RPL13A,NOL11,IMP3,UTP6,ISG20L2
20_Member	Reactome Gene Sets	R-HSA-72649	Translation initiation complex formation	-9.19436	-7.95059	20/58	1968,1973,1975,1977,3921,6187,6189,6194,6201,6202,6206,6208,6210,6222,6228,6229,6233,6234,8894,26986	EIF2S3,EIF4A1,EIF4B,EIF4E,RPSA,RPS2,RPS3A,RPS6,RPS7,RPS8,RPS12,RPS14,RPS15A,RPS18,RPS23,RPS24,RPS27A,RPS28,EIF2S2,PABPC1
20_Member	Reactome Gene Sets	R-HSA-72702	Ribosomal scanning and start codon recognition	-9.19436	-7.95059	20/58	1968,1973,1975,1977,1983,3921,6187,6189,6194,6201,6202,6206,6208,6210,6222,6228,6229,6233,6234,8894	EIF2S3,EIF4A1,EIF4B,EIF4E,EIF5,RPSA,RPS2,RPS3A,RPS6,RPS7,RPS8,RPS12,RPS14,RPS15A,RPS18,RPS23,RPS24,RPS27A,RPS28,EIF2S2
20_Member	KEGG Pathway	hsa03010	Ribosome	-9.16246	-7.92199	34/153	3921,6124,6130,6133,6137,6141,6142,6143,6152,6154,6158,6167,6171,6181,6183,6187,6189,6194,6201,6202,6206,6208,6210,6222,6228,6229,6233,6234,7311,9045,9349,23521,55173,64981	RPSA,RPL4,RPL7A,RPL9,RPL13,RPL18,RPL18A,RPL19,RPL24,RPL26,RPL28,RPL37,RPL41,RPLP2,MRPS12,RPS2,RPS3A,RPS6,RPS7,RPS8,RPS12,RPS14,RPS15A,RPS18,RPS23,RPS24,RPS27A,RPS28,UBA52,RPL14,RPL23,RPL13A,MRPS10,MRPL34
20_Member	KEGG Pathway	ko03010	Ribosome	-9.16246	-7.92199	34/153	3921,6124,6130,6133,6137,6141,6142,6143,6152,6154,6158,6167,6171,6181,6183,6187,6189,6194,6201,6202,6206,6208,6210,6222,6228,6229,6233,6234,7311,9045,9349,23521,55173,64981	RPSA,RPL4,RPL7A,RPL9,RPL13,RPL18,RPL18A,RPL19,RPL24,RPL26,RPL28,RPL37,RPL41,RPLP2,MRPS12,RPS2,RPS3A,RPS6,RPS7,RPS8,RPS12,RPS14,RPS15A,RPS18,RPS23,RPS24,RPS27A,RPS28,UBA52,RPL14,RPL23,RPL13A,MRPS10,MRPL34
20_Member	CORUM	CORUM:338	40S ribosomal subunit, cytoplasmic	-8.40524	-7.21614	14/31	3921,6187,6189,6194,6201,6202,6206,6208,6210,6222,6228,6229,6233,6234	RPSA,RPS2,RPS3A,RPS6,RPS7,RPS8,RPS12,RPS14,RPS15A,RPS18,RPS23,RPS24,RPS27A,RPS28
20_Member	CORUM	CORUM:308	60S ribosomal subunit, cytoplasmic	-8.27579	-7.09248	17/47	6124,6130,6133,6137,6141,6142,6143,6152,6154,6158,6167,6171,6181,7311,9045,9349,23521	RPL4,RPL7A,RPL9,RPL13,RPL18,RPL18A,RPL19,RPL24,RPL26,RPL28,RPL37,RPL41,RPLP2,UBA52,RPL14,RPL23,RPL13A
20_Member	CORUM	CORUM:305	40S ribosomal subunit, cytoplasmic	-7.97202	-6.80814	14/33	3921,6187,6189,6194,6201,6202,6206,6208,6210,6222,6228,6229,6233,6234	RPSA,RPS2,RPS3A,RPS6,RPS7,RPS8,RPS12,RPS14,RPS15A,RPS18,RPS23,RPS24,RPS27A,RPS28
20_Member	Reactome Gene Sets	R-HSA-72695	Formation of the ternary complex, and subsequently, the 43S complex	-6.82701	-5.74724	16/51	1968,3921,6187,6189,6194,6201,6202,6206,6208,6210,6222,6228,6229,6233,6234,8894	EIF2S3,RPSA,RPS2,RPS3A,RPS6,RPS7,RPS8,RPS12,RPS14,RPS15A,RPS18,RPS23,RPS24,RPS27A,RPS28,EIF2S2

## Sheet: CL3 Enrichment
GroupID	Category	Term	Description	LogP	Log(q-value)	InTerm_InList	Genes	Symbols
1_Summary	Reactome Gene Sets	R-HSA-1280215	Cytokine Signaling in Immune system	-44.8869	-40.5252	136/715	27,103,207,302,332,595,608,821,829,836,867,920,948,1026,1027,1052,1072,1154,1398,1445,1845,2247,2308,2335,2625,2885,3106,3146,3320,3434,3454,3455,3552,3560,3566,3570,3588,3604,3654,3659,3687,3716,3836,3838,3839,3845,3911,3936,3977,4001,4205,4215,4261,4282,4318,4609,4792,4939,5062,5300,5478,5519,5528,5580,5594,5598,5599,5683,5685,5687,5690,5693,5702,5713,5718,5719,5720,5721,5724,5743,5795,5898,590…	ABL2,ADAR,AKT1,ANXA2,BIRC5,CCND1,TNFRSF17,CANX,CAPZA1,CASP3,CBL,CD4,CD36,CDKN1A,CDKN1B,CEBPD,CFL1,CISH,CRK,CSK,DUSP3,FGF2,FOXO1,FN1,GATA3,GRB2,HLA-B,HMGB1,HSP90AA1,IFIT1,IFNAR1,IFNAR2,IL1A,IL2RB,IL4R,IL6R,IL10RB,TNFRSF9,IRAK1,IRF1,ITGAX,JAK1,KPNA1,KPNA2,KPNA3,KRAS,LAMA5,LCP1,LIFR,LMNB1,MEF2A,MAP3K3,CIITA,MIF,MMP9,MYC,NFKBIA,OAS2,PAK2,PIN1,PPIA,PPP2R1B,PPP2R5D,PRKCD,MAPK1,MAPK7,MAPK8,PSMA2,PSMA4,P…
1_Member	Reactome Gene Sets	R-HSA-1280215	Cytokine Signaling in Immune system	-44.8869	-40.5252	136/715	27,103,207,302,332,595,608,821,829,836,867,920,948,1026,1027,1052,1072,1154,1398,1445,1845,2247,2308,2335,2625,2885,3106,3146,3320,3434,3454,3455,3552,3560,3566,3570,3588,3604,3654,3659,3687,3716,3836,3838,3839,3845,3911,3936,3977,4001,4205,4215,4261,4282,4318,4609,4792,4939,5062,5300,5478,5519,5528,5580,5594,5598,5599,5683,5685,5687,5690,5693,5702,5713,5718,5719,5720,5721,5724,5743,5795,5898,590…	ABL2,ADAR,AKT1,ANXA2,BIRC5,CCND1,TNFRSF17,CANX,CAPZA1,CASP3,CBL,CD4,CD36,CDKN1A,CDKN1B,CEBPD,CFL1,CISH,CRK,CSK,DUSP3,FGF2,FOXO1,FN1,GATA3,GRB2,HLA-B,HMGB1,HSP90AA1,IFIT1,IFNAR1,IFNAR2,IL1A,IL2RB,IL4R,IL6R,IL10RB,TNFRSF9,IRAK1,IRF1,ITGAX,JAK1,KPNA1,KPNA2,KPNA3,KRAS,LAMA5,LCP1,LIFR,LMNB1,MEF2A,MAP3K3,CIITA,MIF,MMP9,MYC,NFKBIA,OAS2,PAK2,PIN1,PPIA,PPP2R1B,PPP2R5D,PRKCD,MAPK1,MAPK7,MAPK8,PSMA2,PSMA4,P…
1_Member	Reactome Gene Sets	R-HSA-449147	Signaling by Interleukins	-34.8638	-31.1042	96/462	207,302,332,595,821,829,836,867,920,948,1026,1052,1072,1154,1398,1845,2247,2308,2335,2625,2885,3146,3320,3552,3560,3566,3570,3588,3654,3687,3716,3911,3936,3977,4001,4205,4215,4282,4318,4609,4792,5062,5478,5519,5528,5594,5598,5599,5683,5685,5687,5690,5693,5702,5713,5718,5719,5720,5721,5724,5743,5898,5908,5970,6095,6175,6195,6464,6627,6655,6657,6772,6773,6777,6813,6888,7040,7157,7184,7189,7335,7412…	AKT1,ANXA2,BIRC5,CCND1,CANX,CAPZA1,CASP3,CBL,CD4,CD36,CDKN1A,CEBPD,CFL1,CISH,CRK,DUSP3,FGF2,FOXO1,FN1,GATA3,GRB2,HMGB1,HSP90AA1,IL1A,IL2RB,IL4R,IL6R,IL10RB,IRAK1,ITGAX,JAK1,LAMA5,LCP1,LIFR,LMNB1,MEF2A,MAP3K3,MIF,MMP9,MYC,NFKBIA,PAK2,PPIA,PPP2R1B,PPP2R5D,MAPK1,MAPK7,MAPK8,PSMA2,PSMA4,PSMA6,PSMB2,PSMB5,PSMC3,PSMD7,PSMD12,PSMD13,PSME1,PSME2,PTAFR,PTGS2,RALA,RAP1B,RELA,RORA,RPLP0,RPS6KA1,SHC1,SNRPA1,…
1_Member	Reactome Gene Sets	R-HSA-6785807	Interleukin-4 and Interleukin-13 signaling	-15.8021	-13.6251	31/108	207,332,595,948,1026,1052,2247,2308,2335,2625,3320,3552,3566,3570,3687,3716,3911,4318,4609,5743,6095,6657,6772,7040,7157,7184,7412,7422,7431,8651,9021	AKT1,BIRC5,CCND1,CD36,CDKN1A,CEBPD,FGF2,FOXO1,FN1,GATA3,HSP90AA1,IL1A,IL4R,IL6R,ITGAX,JAK1,LAMA5,MMP9,MYC,PTGS2,RORA,SOX2,STAT1,TGFB1,TP53,HSP90B1,VCAM1,VEGFA,VIM,SOCS1,SOCS3
2_Summary	Reactome Gene Sets	R-HSA-2262752	Cellular responses to stress	-37.2563	-33.1956	129/757	335,467,472,571,648,829,830,890,1019,1021,1026,1027,1032,1051,1200,1340,1387,1871,1915,1968,2033,2289,2876,2908,2932,3021,3159,3304,3310,3320,3552,3921,4001,4193,4194,4209,4683,4780,4800,5580,5594,5598,5599,5683,5685,5687,5690,5693,5702,5713,5718,5719,5720,5721,5925,5931,5970,6095,6117,6122,6129,6142,6143,6146,6152,6156,6158,6164,6165,6169,6171,6175,6181,6187,6188,6193,6195,6201,6202,6222,6229,62…	APOA1,ATF3,ATM,BACH1,BMI1,CAPZA1,CAPZA2,CCNA2,CDK4,CDK6,CDKN1A,CDKN1B,CDKN2D,CEBPB,TPP1,COX6B1,CREBBP,E2F3,EEF1A1,EIF2S3,EP300,FKBP5,GPX1,NR3C1,GSK3B,H3-3B,HMGA1,HSPA1B,HSPA6,HSP90AA1,IL1A,RPSA,LMNB1,MDM2,MDM4,MEF2D,NBN,NFE2L2,NFYA,PRKCD,MAPK1,MAPK7,MAPK8,PSMA2,PSMA4,PSMA6,PSMB2,PSMB5,PSMC3,PSMD7,PSMD12,PSMD13,PSME1,PSME2,RB1,RBBP7,RELA,RORA,RPA1,RPL3,RPL7,RPL18A,RPL19,RPL22,RPL24,RPL30,RPL28,RPL…
2_Member	Reactome Gene Sets	R-HSA-2262752	Cellular responses to stress	-37.2563	-33.1956	129/757	335,467,472,571,648,829,830,890,1019,1021,1026,1027,1032,1051,1200,1340,1387,1871,1915,1968,2033,2289,2876,2908,2932,3021,3159,3304,3310,3320,3552,3921,4001,4193,4194,4209,4683,4780,4800,5580,5594,5598,5599,5683,5685,5687,5690,5693,5702,5713,5718,5719,5720,5721,5925,5931,5970,6095,6117,6122,6129,6142,6143,6146,6152,6156,6158,6164,6165,6169,6171,6175,6181,6187,6188,6193,6195,6201,6202,6222,6229,62…	APOA1,ATF3,ATM,BACH1,BMI1,CAPZA1,CAPZA2,CCNA2,CDK4,CDK6,CDKN1A,CDKN1B,CDKN2D,CEBPB,TPP1,COX6B1,CREBBP,E2F3,EEF1A1,EIF2S3,EP300,FKBP5,GPX1,NR3C1,GSK3B,H3-3B,HMGA1,HSPA1B,HSPA6,HSP90AA1,IL1A,RPSA,LMNB1,MDM2,MDM4,MEF2D,NBN,NFE2L2,NFYA,PRKCD,MAPK1,MAPK7,MAPK8,PSMA2,PSMA4,PSMA6,PSMB2,PSMB5,PSMC3,PSMD7,PSMD12,PSMD13,PSME1,PSME2,RB1,RBBP7,RELA,RORA,RPA1,RPL3,RPL7,RPL18A,RPL19,RPL22,RPL24,RPL30,RPL28,RPL…
2_Member	Reactome Gene Sets	R-HSA-8953897	Cellular responses to stimuli	-36.4005	-32.5159	129/771	335,467,472,571,648,829,830,890,1019,1021,1026,1027,1032,1051,1200,1340,1387,1871,1915,1968,2033,2289,2876,2908,2932,3021,3159,3304,3310,3320,3552,3921,4001,4193,4194,4209,4683,4780,4800,5580,5594,5598,5599,5683,5685,5687,5690,5693,5702,5713,5718,5719,5720,5721,5925,5931,5970,6095,6117,6122,6129,6142,6143,6146,6152,6156,6158,6164,6165,6169,6171,6175,6181,6187,6188,6193,6195,6201,6202,6222,6229,62…	APOA1,ATF3,ATM,BACH1,BMI1,CAPZA1,CAPZA2,CCNA2,CDK4,CDK6,CDKN1A,CDKN1B,CDKN2D,CEBPB,TPP1,COX6B1,CREBBP,E2F3,EEF1A1,EIF2S3,EP300,FKBP5,GPX1,NR3C1,GSK3B,H3-3B,HMGA1,HSPA1B,HSPA6,HSP90AA1,IL1A,RPSA,LMNB1,MDM2,MDM4,MEF2D,NBN,NFE2L2,NFYA,PRKCD,MAPK1,MAPK7,MAPK8,PSMA2,PSMA4,PSMA6,PSMB2,PSMB5,PSMC3,PSMD7,PSMD12,PSMD13,PSME1,PSME2,RB1,RBBP7,RELA,RORA,RPA1,RPL3,RPL7,RPL18A,RPL19,RPL22,RPL24,RPL30,RPL28,RPL…
3_Summary	KEGG Pathway	hsa05200	Pathways in cancer	-33.6159	-29.9531	87/395	107,109,115,207,332,387,595,836,867,1019,1021,1026,1027,1282,1387,1398,1630,1855,1871,1956,2033,2247,2250,2254,2260,2308,2335,2737,2771,2782,2885,2932,3320,3479,3480,3655,3716,3845,3911,3913,3915,4087,4149,4193,4318,4609,4792,5156,5467,5594,5599,5743,5879,5894,5898,5900,5925,5970,6655,6772,6777,6789,7039,7040,7046,7157,7184,7185,7186,7189,7422,7423,7473,7474,7855,8312,8322,8503,9475,10235,10672,1…	ADCY1,ADCY3,ADCY9,AKT1,BIRC5,RHOA,CCND1,CASP3,CBL,CDK4,CDK6,CDKN1A,CDKN1B,COL4A1,CREBBP,CRK,DCC,DVL1,E2F3,EGFR,EP300,FGF2,FGF5,FGF9,FGFR1,FOXO1,FN1,GLI3,GNAI2,GNB1,GRB2,GSK3B,HSP90AA1,IGF1,IGF1R,ITGA6,JAK1,KRAS,LAMA5,LAMB2,LAMC1,SMAD2,MAX,MDM2,MMP9,MYC,NFKBIA,PDGFRA,PPARD,MAPK1,MAPK8,PTGS2,RAC1,RAF1,RALA,RALGDS,RB1,RELA,SOS2,STAT1,STAT5B,STK4,TGFA,TGFB1,TGFBR1,TP53,HSP90B1,TRAF1,TRAF2,TRAF6,VEGFA…
3_Member	KEGG Pathway	hsa05200	Pathways in cancer	-33.6159	-29.9531	87/395	107,109,115,207,332,387,595,836,867,1019,1021,1026,1027,1282,1387,1398,1630,1855,1871,1956,2033,2247,2250,2254,2260,2308,2335,2737,2771,2782,2885,2932,3320,3479,3480,3655,3716,3845,3911,3913,3915,4087,4149,4193,4318,4609,4792,5156,5467,5594,5599,5743,5879,5894,5898,5900,5925,5970,6655,6772,6777,6789,7039,7040,7046,7157,7184,7185,7186,7189,7422,7423,7473,7474,7855,8312,8322,8503,9475,10235,10672,1…	ADCY1,ADCY3,ADCY9,AKT1,BIRC5,RHOA,CCND1,CASP3,CBL,CDK4,CDK6,CDKN1A,CDKN1B,COL4A1,CREBBP,CRK,DCC,DVL1,E2F3,EGFR,EP300,FGF2,FGF5,FGF9,FGFR1,FOXO1,FN1,GLI3,GNAI2,GNB1,GRB2,GSK3B,HSP90AA1,IGF1,IGF1R,ITGA6,JAK1,KRAS,LAMA5,LAMB2,LAMC1,SMAD2,MAX,MDM2,MMP9,MYC,NFKBIA,PDGFRA,PPARD,MAPK1,MAPK8,PTGS2,RAC1,RAF1,RALA,RALGDS,RB1,RELA,SOS2,STAT1,STAT5B,STK4,TGFA,TGFB1,TGFBR1,TP53,HSP90B1,TRAF1,TRAF2,TRAF6,VEGFA…
3_Member	KEGG Pathway	ko05205	Proteoglycans in cancer	-17.7458	-15.3479	45/203	60,71,207,387,595,836,867,1026,1839,1956,2247,2260,2335,2549,2885,3236,3479,3480,3678,3845,4087,4193,4318,4609,4660,5329,5594,5879,5894,6655,7040,7057,7157,7422,7473,7474,7855,8322,8503,9475,10818,10855,54361,89780,406903	ACTB,ACTG1,AKT1,RHOA,CCND1,CASP3,CBL,CDKN1A,HBEGF,EGFR,FGF2,FGFR1,FN1,GAB1,GRB2,HOXD10,IGF1,IGF1R,ITGA5,KRAS,SMAD2,MDM2,MMP9,MYC,PPP1R12B,PLAUR,MAPK1,RAC1,RAF1,SOS2,TGFB1,THBS1,TP53,VEGFA,WNT3,WNT5A,FZD5,FZD4,PIK3R3,ROCK2,FRS2,HPSE,WNT4,WNT3A,MIR10B
3_Member	WikiPathways	WP4262	Breast cancer pathway	-17.2853	-14.9322	39/157	142,207,472,595,1019,1021,1026,1647,1855,1871,1956,2100,2247,2250,2254,2260,2885,2932,3479,3480,3845,4609,4683,4851,5594,5894,5925,6464,6655,6667,7157,7473,7474,7855,8312,8503,27006,54361,89780	PARP1,AKT1,ATM,CCND1,CDK4,CDK6,CDKN1A,GADD45A,DVL1,E2F3,EGFR,ESR2,FGF2,FGF5,FGF9,FGFR1,GRB2,GSK3B,IGF1,IGF1R,KRAS,MYC,NBN,NOTCH1,MAPK1,RAF1,RB1,SHC1,SOS2,SP1,TP53,WNT3,WNT5A,FZD5,AXIN1,PIK3R3,FGF22,WNT4,WNT3A
3_Member	KEGG Pathway	hsa05205	Proteoglycans in cancer	-17.226	-14.8813	46/218	60,71,207,387,595,836,867,1026,1839,1956,2247,2260,2335,2549,2885,3236,3479,3480,3678,3845,4087,4193,4318,4609,4660,5329,5594,5879,5894,6655,7040,7057,7157,7422,7473,7474,7855,8322,8503,9475,10818,10855,22883,54361,89780,406903	ACTB,ACTG1,AKT1,RHOA,CCND1,CASP3,CBL,CDKN1A,HBEGF,EGFR,FGF2,FGFR1,FN1,GAB1,GRB2,HOXD10,IGF1,IGF1R,ITGA5,KRAS,SMAD2,MDM2,MMP9,MYC,PPP1R12B,PLAUR,MAPK1,RAC1,RAF1,SOS2,TGFB1,THBS1,TP53,VEGFA,WNT3,WNT5A,FZD5,FZD4,PIK3R3,ROCK2,FRS2,HPSE,CLSTN1,WNT4,WNT3A,MIR10B
3_Member	KEGG Pathway	hsa05166	HTLV-I infection	-17.1724	-14.8441	50/256	107,109,115,207,467,472,595,821,917,1019,1026,1387,1390,1855,1871,2033,2648,2932,3106,3560,3716,3845,4087,4215,4609,4792,5156,5423,5532,5599,5925,5970,6777,7040,7046,7157,7412,7416,7417,7473,7474,7514,7855,8295,8322,8503,54361,83660,89780,94241	ADCY1,ADCY3,ADCY9,AKT1,ATF3,ATM,CCND1,CANX,CD3G,CDK4,CDKN1A,CREBBP,CREM,DVL1,E2F3,EP300,KAT2A,GSK3B,HLA-B,IL2RB,JAK1,KRAS,SMAD2,MAP3K3,MYC,NFKBIA,PDGFRA,POLB,PPP3CB,MAPK8,RB1,RELA,STAT5B,TGFB1,TGFBR1,TP53,VCAM1,VDAC1,VDAC2,WNT3,WNT5A,XPO1,FZD5,TRRAP,FZD4,PIK3R3,WNT4,TLN2,WNT3A,TP53INP1
3_Member	KEGG Pathway	ko05166	HTLV-I infection	-17.1724	-14.8441	50/256	107,109,115,207,467,472,595,821,917,1019,1026,1387,1390,1855,1871,2033,2648,2932,3106,3560,3716,3845,4087,4215,4609,4792,5156,5423,5532,5599,5925,5970,6777,7040,7046,7157,7412,7416,7417,7473,7474,7514,7855,8295,8322,8503,54361,83660,89780,94241	ADCY1,ADCY3,ADCY9,AKT1,ATF3,ATM,CCND1,CANX,CD3G,CDK4,CDKN1A,CREBBP,CREM,DVL1,E2F3,EP300,KAT2A,GSK3B,HLA-B,IL2RB,JAK1,KRAS,SMAD2,MAP3K3,MYC,NFKBIA,PDGFRA,POLB,PPP3CB,MAPK8,RB1,RELA,STAT5B,TGFB1,TGFBR1,TP53,VCAM1,VDAC1,VDAC2,WNT3,WNT5A,XPO1,FZD5,TRRAP,FZD4,PIK3R3,WNT4,TLN2,WNT3A,TP53INP1
3_Member	KEGG Pathway	hsa05224	Breast cancer	-16.7774	-14.4981	39/162	207,595,1019,1021,1026,1647,1855,1871,1956,2100,2247,2250,2254,2260,2885,2932,3479,3480,3845,4609,4851,5594,5894,5925,6464,6655,6667,7157,7473,7474,7855,8209,8312,8322,8503,22883,27006,54361,89780	AKT1,CCND1,CDK4,CDK6,CDKN1A,GADD45A,DVL1,E2F3,EGFR,ESR2,FGF2,FGF5,FGF9,FGFR1,GRB2,GSK3B,IGF1,IGF1R,KRAS,MYC,NOTCH1,MAPK1,RAF1,RB1,SHC1,SOS2,SP1,TP53,WNT3,WNT5A,FZD5,GATD3,AXIN1,FZD4,PIK3R3,CLSTN1,FGF22,WNT4,WNT3A
3_Member	KEGG Pathway	ko05224	Breast cancer	-16.1042	-13.8978	36/144	207,595,1019,1021,1026,1855,1871,1956,2100,2247,2250,2254,2260,2885,2932,3479,3480,3845,4609,4851,5594,5894,5925,6464,6655,6667,7157,7473,7474,7855,8312,8322,8503,27006,54361,89780	AKT1,CCND1,CDK4,CDK6,CDKN1A,DVL1,E2F3,EGFR,ESR2,FGF2,FGF5,FGF9,FGFR1,GRB2,GSK3B,IGF1,IGF1R,KRAS,MYC,NOTCH1,MAPK1,RAF1,RB1,SHC1,SOS2,SP1,TP53,WNT3,WNT5A,FZD5,AXIN1,FZD4,PIK3R3,FGF22,WNT4,WNT3A
3_Member	WikiPathways	WP710	DNA damage response (only ATM dependent)	-14.0737	-12.0928	30/115	207,387,472,595,1026,1027,1855,2885,2932,3146,3845,3949,4193,4609,5594,5599,5879,6342,6464,6655,7040,7157,7473,7474,8312,8503,10018,30849,54361,89780	AKT1,RHOA,ATM,CCND1,CDKN1A,CDKN1B,DVL1,GRB2,GSK3B,HMGB1,KRAS,LDLR,MDM2,MYC,MAPK1,MAPK8,RAC1,SCP2,SHC1,SOS2,TGFB1,TP53,WNT3,WNT5A,AXIN1,PIK3R3,BCL2L11,PIK3R4,WNT4,WNT3A
3_Member	WikiPathways	WP3680	Physico-chemical features and toxicity-associated pathways	-13.6121	-11.6637	23/68	207,387,867,1026,1027,1855,1956,2335,2876,2885,2932,4609,4638,5594,5599,5894,6464,7039,7855,8312,8322,9475,10097	AKT1,RHOA,CBL,CDKN1A,CDKN1B,DVL1,EGFR,FN1,GPX1,GRB2,GSK3B,MYC,MYLK,MAPK1,MAPK8,RAF1,SHC1,TGFA,FZD5,AXIN1,FZD4,ROCK2,ACTR2
3_Member	KEGG Pathway	ko04390	Hippo signaling pathway	-12.7504	-10.8672	33/154	60,71,332,595,1855,2932,4087,4609,5054,5519,5521,6657,7040,7046,7159,7473,7474,7529,7531,7532,7533,7534,7855,8200,8312,8322,11186,23513,25937,54361,84962,89780,353500	ACTB,ACTG1,BIRC5,CCND1,DVL1,GSK3B,SMAD2,MYC,SERPINE1,PPP2R1B,PPP2R2B,SOX2,TGFB1,TGFBR1,TP53BP2,WNT3,WNT5A,YWHAB,YWHAE,YWHAG,YWHAH,YWHAZ,FZD5,GDF5,AXIN1,FZD4,RASSF1,SCRIB,WWTR1,WNT4,AJUBA,WNT3A,BMP8A
3_Member	KEGG Pathway	hsa04390	Hippo signaling pathway	-12.6174	-10.7428	35/174	60,71,332,595,1855,2932,4087,4609,5054,5519,5521,6657,7040,7046,7159,7473,7474,7529,7531,7532,7533,7534,7855,8200,8312,8322,11186,23513,25937,54361,79633,83937,84962,89780,353500	ACTB,ACTG1,BIRC5,CCND1,DVL1,GSK3B,SMAD2,MYC,SERPINE1,PPP2R1B,PPP2R2B,SOX2,TGFB1,TGFBR1,TP53BP2,WNT3,WNT5A,YWHAB,YWHAE,YWHAG,YWHAH,YWHAZ,FZD5,GDF5,AXIN1,FZD4,RASSF1,SCRIB,WWTR1,WNT4,FAT4,RASSF4,AJUBA,WNT3A,BMP8A
3_Member	WikiPathways	WP4239	Epithelial to mesenchymal transition in colorectal cancer	-12.5942	-10.7238	34/165	207,1282,1366,2335,2885,2932,3678,3845,4087,4209,4318,4851,5594,5599,5894,6464,6615,6655,7040,7046,7157,7189,7473,7474,7855,8322,8503,8726,8828,9518,9839,23512,54361,89780	AKT1,COL4A1,CLDN7,FN1,GRB2,GSK3B,ITGA5,KRAS,SMAD2,MEF2D,MMP9,NOTCH1,MAPK1,MAPK8,RAF1,SHC1,SNAI1,SOS2,TGFB1,TGFBR1,TP53,TRAF6,WNT3,WNT5A,FZD5,FZD4,PIK3R3,EED,NRP2,GDF15,ZEB2,SUZ12,WNT4,WNT3A
3_Member	WikiPathways	WP3931	Embryonic stem cell pluripotency pathways	-10.393	-8.69213	26/119	207,1855,1956,2247,2250,2254,2260,2549,2885,2932,3716,3977,4193,5156,5594,5598,5894,7473,7474,7855,8312,8322,10097,27006,54361,89780	AKT1,DVL1,EGFR,FGF2,FGF5,FGF9,FGFR1,GAB1,GRB2,GSK3B,JAK1,LIFR,MDM2,PDGFRA,MAPK1,MAPK7,RAF1,WNT3,WNT5A,FZD5,AXIN1,FZD4,ACTR2,FGF22,WNT4,WNT3A
3_Member	WikiPathways	WP399	Wnt signaling pathway and pluripotency	-9.89829	-8.23206	24/107	387,595,1387,1855,2033,2932,3949,4609,4800,5467,5519,5521,5580,6657,7157,7473,7474,7855,8312,8322,26190,29127,54361,89780	RHOA,CCND1,CREBBP,DVL1,EP300,GSK3B,LDLR,MYC,NFYA,PPARD,PPP2R1B,PPP2R2B,PRKCD,SOX2,TP53,WNT3,WNT5A,FZD5,AXIN1,FZD4,FBXW2,RACGAP1,WNT4,WNT3A
3_Member	KEGG Pathway	ko04550	Signaling pathways regulating pluripotency of stem cells	-9.53128	-7.89475	27/139	207,648,1855,2247,2260,2885,2932,3479,3480,3716,3845,3977,4087,4609,5594,5894,6498,6657,7473,7474,7855,8312,8322,8503,54361,55183,89780	AKT1,BMI1,DVL1,FGF2,FGFR1,GRB2,GSK3B,IGF1,IGF1R,JAK1,KRAS,LIFR,SMAD2,MYC,MAPK1,RAF1,SKIL,SOX2,WNT3,WNT5A,FZD5,AXIN1,FZD4,PIK3R3,WNT4,RIF1,WNT3A
3_Member	KEGG Pathway	hsa04550	Signaling pathways regulating pluripotency of stem cells	-9.23256	-7.629	28/153	207,648,1855,2247,2260,2885,2932,3479,3480,3716,3845,3977,4087,4609,5594,5894,6498,6657,7473,7474,7855,8312,8322,8503,22883,54361,55183,89780	AKT1,BMI1,DVL1,FGF2,FGFR1,GRB2,GSK3B,IGF1,IGF1R,JAK1,KRAS,LIFR,SMAD2,MYC,MAPK1,RAF1,SKIL,SOX2,WNT3,WNT5A,FZD5,AXIN1,FZD4,PIK3R3,CLSTN1,WNT4,RIF1,WNT3A
3_Member	KEGG Pathway	hsa04150	mTOR signaling pathway	-8.69633	-7.15087	27/151	207,387,1855,2885,2932,3479,3480,3845,5562,5594,5894,6195,6249,6446,6655,7473,7474,7855,8140,8322,8503,9550,9706,51719,54361,54541,89780	AKT1,RHOA,DVL1,GRB2,GSK3B,IGF1,IGF1R,KRAS,PRKAA1,MAPK1,RAF1,RPS6KA1,CLIP1,SGK1,SOS2,WNT3,WNT5A,FZD5,SLC7A5,FZD4,PIK3R3,ATP6V1G1,ULK2,CAB39,WNT4,DDIT4,WNT3A
3_Member	KEGG Pathway	ko04150	mTOR signaling pathway	-8.69633	-7.15087	27/151	207,387,1855,2885,2932,3479,3480,3845,5562,5594,5894,6195,6249,6446,6655,7473,7474,7855,8140,8322,8503,9550,9706,51719,54361,54541,89780	AKT1,RHOA,DVL1,GRB2,GSK3B,IGF1,IGF1R,KRAS,PRKAA1,MAPK1,RAF1,RPS6KA1,CLIP1,SGK1,SOS2,WNT3,WNT5A,FZD5,SLC7A5,FZD4,PIK3R3,ATP6V1G1,ULK2,CAB39,WNT4,DDIT4,WNT3A
3_Member	KEGG Pathway	hsa04916	Melanogenesis	-5.99811	-4.7084	18/101	107,109,115,808,1387,1855,2033,2771,2932,3845,5594,5894,7473,7474,7855,8322,54361,89780	ADCY1,ADCY3,ADCY9,CALM3,CREBBP,DVL1,EP300,GNAI2,GSK3B,KRAS,MAPK1,RAF1,WNT3,WNT5A,FZD5,FZD4,WNT4,WNT3A
3_Member	KEGG Pathway	ko04916	Melanogenesis	-5.99811	-4.7084	18/101	107,109,115,808,1387,1855,2033,2771,2932,3845,5594,5894,7473,7474,7855,8322,54361,89780	ADCY1,ADCY3,ADCY9,CALM3,CREBBP,DVL1,EP300,GNAI2,GSK3B,KRAS,MAPK1,RAF1,WNT3,WNT5A,FZD5,FZD4,WNT4,WNT3A
3_Member	KEGG Pathway	hsa04310	Wnt signaling pathway	-5.4593	-4.22696	21/143	387,595,1387,1855,2033,2932,4609,5467,5532,5599,5879,7157,7473,7474,7855,8312,8322,9475,25805,54361,89780	RHOA,CCND1,CREBBP,DVL1,EP300,GSK3B,MYC,PPARD,PPP3CB,MAPK8,RAC1,TP53,WNT3,WNT5A,FZD5,AXIN1,FZD4,ROCK2,BAMBI,WNT4,WNT3A
3_Member	KEGG Pathway	ko04310	Wnt signaling pathway	-5.4593	-4.22696	21/143	387,595,1387,1855,2033,2932,4609,5467,5532,5599,5879,7157,7473,7474,7855,8312,8322,9475,25805,54361,89780	RHOA,CCND1,CREBBP,DVL1,EP300,GSK3B,MYC,PPARD,PPP3CB,MAPK8,RAC1,TP53,WNT3,WNT5A,FZD5,AXIN1,FZD4,ROCK2,BAMBI,WNT4,WNT3A
3_Member	KEGG Pathway	hsa05217	Basal cell carcinoma	-4.37986	-3.28037	11/55	1855,2737,2932,7157,7473,7474,7855,8312,8322,54361,89780	DVL1,GLI3,GSK3B,TP53,WNT3,WNT5A,FZD5,AXIN1,FZD4,WNT4,WNT3A
3_Member	KEGG Pathway	ko05217	Basal cell carcinoma	-4.37986	-3.28037	11/55	1855,2737,2932,7157,7473,7474,7855,8312,8322,54361,89780	DVL1,GLI3,GSK3B,TP53,WNT3,WNT5A,FZD5,AXIN1,FZD4,WNT4,WNT3A
3_Member	WikiPathways	WP4150	Wnt signaling in kidney disease	-4.19583	-3.12237	9/39	387,1855,5599,7473,7474,7855,8322,54361,89780	RHOA,DVL1,MAPK8,WNT3,WNT5A,FZD5,FZD4,WNT4,WNT3A
3_Member	Canonical Pathways	M5493	WNT SIGNALING	-4.17707	-3.10673	14/89	60,595,1855,2033,2932,4609,7473,7474,7855,8312,8322,26190,54361,89780	ACTB,CCND1,DVL1,EP300,GSK3B,MYC,WNT3,WNT5A,FZD5,AXIN1,FZD4,FBXW2,WNT4,WNT3A
4_Summary	Reactome Gene Sets	R-HSA-9006934	Signaling by Receptor Tyrosine Kinases	-31.1328	-27.5492	97/521	60,71,207,238,382,387,627,639,808,867,1020,1175,1277,1282,1289,1291,1398,1445,1785,1795,1839,1845,1956,2033,2247,2250,2254,2260,2335,2549,2885,3071,3320,3479,3480,3845,3911,3913,3915,4066,4205,4209,4318,4486,4609,4846,5045,5062,5156,5435,5441,5519,5528,5580,5594,5598,5725,5795,5879,5898,5900,5908,5921,6195,6446,6455,6464,6772,6777,7039,7057,7058,7073,7422,7423,7529,7867,8503,8651,8828,8877,9306,9…	ACTB,ACTG1,AKT1,ALK,ARF6,RHOA,BDNF,PRDM1,CALM3,CBL,CDK5,AP2S1,COL1A1,COL4A1,COL5A1,COL6A1,CRK,CSK,DNM2,DOCK3,HBEGF,DUSP3,EGFR,EP300,FGF2,FGF5,FGF9,FGFR1,FN1,GAB1,GRB2,NCKAP1L,HSP90AA1,IGF1,IGF1R,KRAS,LAMA5,LAMB2,LAMC1,LYL1,MEF2A,MEF2D,MMP9,MST1R,MYC,NOS3,FURIN,PAK2,PDGFRA,POLR2F,POLR2L,PPP2R1B,PPP2R5D,PRKCD,MAPK1,MAPK7,PTBP1,PTPRJ,RAC1,RALA,RALGDS,RAP1B,RASA1,RPS6KA1,SGK1,SH3GL1,SHC1,STAT1,STAT5B…
4_Member	Reactome Gene Sets	R-HSA-9006934	Signaling by Receptor Tyrosine Kinases	-31.1328	-27.5492	97/521	60,71,207,238,382,387,627,639,808,867,1020,1175,1277,1282,1289,1291,1398,1445,1785,1795,1839,1845,1956,2033,2247,2250,2254,2260,2335,2549,2885,3071,3320,3479,3480,3845,3911,3913,3915,4066,4205,4209,4318,4486,4609,4846,5045,5062,5156,5435,5441,5519,5528,5580,5594,5598,5725,5795,5879,5898,5900,5908,5921,6195,6446,6455,6464,6772,6777,7039,7057,7058,7073,7422,7423,7529,7867,8503,8651,8828,8877,9306,9…	ACTB,ACTG1,AKT1,ALK,ARF6,RHOA,BDNF,PRDM1,CALM3,CBL,CDK5,AP2S1,COL1A1,COL4A1,COL5A1,COL6A1,CRK,CSK,DNM2,DOCK3,HBEGF,DUSP3,EGFR,EP300,FGF2,FGF5,FGF9,FGFR1,FN1,GAB1,GRB2,NCKAP1L,HSP90AA1,IGF1,IGF1R,KRAS,LAMA5,LAMB2,LAMC1,LYL1,MEF2A,MEF2D,MMP9,MST1R,MYC,NOS3,FURIN,PAK2,PDGFRA,POLR2F,POLR2L,PPP2R1B,PPP2R5D,PRKCD,MAPK1,MAPK7,PTBP1,PTPRJ,RAC1,RALA,RALGDS,RAP1B,RASA1,RPS6KA1,SGK1,SH3GL1,SHC1,STAT1,STAT5B…
4_Member	KEGG Pathway	hsa04151	PI3K-Akt signaling pathway	-24.3585	-21.3617	73/380	207,595,627,1019,1021,1026,1027,1277,1282,1291,1942,1956,2247,2250,2254,2260,2335,2668,2782,2885,2932,3320,3454,3455,3479,3480,3560,3566,3570,3655,3678,3695,3716,3845,3911,3913,3915,4193,4609,4804,4846,5156,5519,5521,5528,5562,5594,5879,5894,5970,6446,6655,7039,7057,7058,7148,7157,7184,7422,7423,7529,7531,7532,7533,7534,8503,8515,9180,10018,22883,23239,27006,54541	AKT1,CCND1,BDNF,CDK4,CDK6,CDKN1A,CDKN1B,COL1A1,COL4A1,COL6A1,EFNA1,EGFR,FGF2,FGF5,FGF9,FGFR1,FN1,GDNF,GNB1,GRB2,GSK3B,HSP90AA1,IFNAR1,IFNAR2,IGF1,IGF1R,IL2RB,IL4R,IL6R,ITGA6,ITGA5,ITGB7,JAK1,KRAS,LAMA5,LAMB2,LAMC1,MDM2,MYC,NGFR,NOS3,PDGFRA,PPP2R1B,PPP2R2B,PPP2R5D,PRKAA1,MAPK1,RAC1,RAF1,RELA,SGK1,SOS2,TGFA,THBS1,THBS2,TNXB,TP53,HSP90B1,VEGFA,VEGFB,YWHAB,YWHAE,YWHAG,YWHAH,YWHAZ,PIK3R3,ITGA10,OSMR,B…
4_Member	KEGG Pathway	ko04151	PI3K-Akt signaling pathway	-24.3432	-21.3617	69/342	207,595,1019,1021,1026,1027,1277,1282,1291,1942,1956,2247,2250,2254,2260,2335,2782,2885,2932,3320,3454,3455,3479,3480,3560,3566,3570,3655,3678,3695,3716,3845,3911,3913,3915,4193,4609,4804,4846,5156,5519,5521,5528,5562,5594,5879,5894,5970,6446,6655,7057,7058,7148,7157,7184,7422,7423,7529,7531,7532,7533,7534,8503,8515,9180,10018,23239,27006,54541	AKT1,CCND1,CDK4,CDK6,CDKN1A,CDKN1B,COL1A1,COL4A1,COL6A1,EFNA1,EGFR,FGF2,FGF5,FGF9,FGFR1,FN1,GNB1,GRB2,GSK3B,HSP90AA1,IFNAR1,IFNAR2,IGF1,IGF1R,IL2RB,IL4R,IL6R,ITGA6,ITGA5,ITGB7,JAK1,KRAS,LAMA5,LAMB2,LAMC1,MDM2,MYC,NGFR,NOS3,PDGFRA,PPP2R1B,PPP2R2B,PPP2R5D,PRKAA1,MAPK1,RAC1,RAF1,RELA,SGK1,SOS2,THBS1,THBS2,TNXB,TP53,HSP90B1,VEGFA,VEGFB,YWHAB,YWHAE,YWHAG,YWHAH,YWHAZ,PIK3R3,ITGA10,OSMR,BCL2L11,PHLPP1,F…
4_Member	WikiPathways	WP4172	PI3K-Akt signaling pathway	-21.9626	-19.1194	66/345	207,595,627,1019,1021,1026,1027,1277,1282,1291,1942,1956,2247,2250,2254,2260,2335,2782,2885,2932,3320,3454,3455,3479,3480,3560,3566,3570,3655,3678,3695,3716,3845,3911,3913,3915,4193,4609,4804,4846,5156,5519,5521,5528,5562,5594,5879,5894,5970,6446,6655,7039,7057,7058,7148,7157,7184,7422,7423,8503,8515,9180,10018,23239,27006,54541	AKT1,CCND1,BDNF,CDK4,CDK6,CDKN1A,CDKN1B,COL1A1,COL4A1,COL6A1,EFNA1,EGFR,FGF2,FGF5,FGF9,FGFR1,FN1,GNB1,GRB2,GSK3B,HSP90AA1,IFNAR1,IFNAR2,IGF1,IGF1R,IL2RB,IL4R,IL6R,ITGA6,ITGA5,ITGB7,JAK1,KRAS,LAMA5,LAMB2,LAMC1,MDM2,MYC,NGFR,NOS3,PDGFRA,PPP2R1B,PPP2R2B,PPP2R5D,PRKAA1,MAPK1,RAC1,RAF1,RELA,SGK1,SOS2,TGFA,THBS1,THBS2,TNXB,TP53,HSP90B1,VEGFA,VEGFB,PIK3R3,ITGA10,OSMR,BCL2L11,PHLPP1,FGF22,DDIT4
4_Member	GO Biological Processes	GO:0007169	transmembrane receptor protein tyrosine kinase signaling pathway	-21.0701	-18.3623	91/629	207,238,627,836,867,920,1001,1019,1277,1282,1398,1839,1845,1942,1956,2247,2250,2254,2260,2296,2308,2529,2549,2625,2771,2865,2885,2932,3416,3479,3480,3482,3678,4318,4486,4804,5062,5156,5329,5562,5580,5594,5739,5795,5879,5894,5921,5970,6464,6662,6760,6777,7039,7040,7057,7301,7422,7423,7474,7763,7867,8322,8503,8527,8651,8828,9021,9518,9860,9961,10273,10628,10818,10849,23411,27006,27020,27131,54206,5…	AKT1,ALK,BDNF,CASP3,CBL,CD4,CDH3,CDK4,COL1A1,COL4A1,CRK,HBEGF,DUSP3,EFNA1,EGFR,FGF2,FGF5,FGF9,FGFR1,FOXC1,FOXO1,FUT7,GAB1,GATA3,GNAI2,FFAR3,GRB2,GSK3B,IDE,IGF1,IGF1R,IGF2R,ITGA5,MMP9,MST1R,NGFR,PAK2,PDGFRA,PLAUR,PRKAA1,PRKCD,MAPK1,PTGIR,PTPRJ,RAC1,RAF1,RASA1,RELA,SHC1,SOX9,SS18,STAT5B,TGFA,TGFB1,THBS1,TYRO3,VEGFA,VEGFB,WNT5A,ZFAND5,MAPKAPK3,FZD4,PIK3R3,DGKD,SOCS1,NRP2,SOCS3,GDF15,LRIG2,MVP,STUB1,…
4_Member	WikiPathways	WP3932	Focal adhesion: PI3K-Akt-mTOR-signaling pathway	-18.2641	-15.8	57/309	207,1026,1027,1277,1282,1289,1942,1956,2247,2254,2260,2308,2335,2782,2885,2932,3169,3320,3454,3455,3479,3480,3560,3566,3570,3655,3678,3687,3695,3716,3845,3911,3913,3915,4193,4804,4846,5156,5519,5521,5528,5562,5594,5894,7057,7058,7148,7184,7422,7423,8515,9180,23239,27006,30849,51719,54541	AKT1,CDKN1A,CDKN1B,COL1A1,COL4A1,COL5A1,EFNA1,EGFR,FGF2,FGF9,FGFR1,FOXO1,FN1,GNB1,GRB2,GSK3B,FOXA1,HSP90AA1,IFNAR1,IFNAR2,IGF1,IGF1R,IL2RB,IL4R,IL6R,ITGA6,ITGA5,ITGAX,ITGB7,JAK1,KRAS,LAMA5,LAMB2,LAMC1,MDM2,NGFR,NOS3,PDGFRA,PPP2R1B,PPP2R2B,PPP2R5D,PRKAA1,MAPK1,RAF1,THBS1,THBS2,TNXB,HSP90B1,VEGFA,VEGFB,ITGA10,OSMR,PHLPP1,FGF22,PIK3R4,CAB39,DDIT4
5_Summary	GO Biological Processes	GO:0030155	regulation of cell adhesion	-30.6302	-27.1136	118/751	27,71,81,100,207,335,387,396,398,472,648,836,920,948,1021,1051,1277,1295,1398,1445,1604,1785,1845,1942,2335,2523,2529,2625,2737,2932,3071,3146,3169,3329,3479,3491,3552,3566,3654,3655,3659,3716,3911,3956,3987,4221,4763,4851,5054,5074,5270,5329,5573,5580,5598,5613,5724,5795,5879,5921,5970,6188,6657,6659,6662,6666,6777,6789,7037,7040,7057,7189,7412,7422,7474,8322,8379,8651,8728,8740,8744,8751,8754,8…	ABL2,ACTG1,ACTN4,ADA,AKT1,APOA1,RHOA,ARHGDIA,ARHGDIG,ATM,BMI1,CASP3,CD4,CD36,CDK6,CEBPB,COL1A1,COL8A1,CRK,CSK,CD55,DNM2,DUSP3,EFNA1,FN1,FUT1,FUT7,GATA3,GLI3,GSK3B,NCKAP1L,HMGB1,FOXA1,HSPD1,IGF1,CCN1,IL1A,IL4R,IRAK1,ITGA6,IRF1,JAK1,LAMA5,LGALS1,LIMS1,MEN1,NF1,NOTCH1,SERPINE1,PAWR,SERPINE2,PLAUR,PRKAR1A,PRKCD,MAPK7,PRKX,PTAFR,PTPRJ,RAC1,RASA1,RELA,RPS3,SOX2,SOX4,SOX9,SOX12,STAT5B,STK4,TFRC,TGFB1,TH…
5_Member	GO Biological Processes	GO:0030155	regulation of cell adhesion	-30.6302	-27.1136	118/751	27,71,81,100,207,335,387,396,398,472,648,836,920,948,1021,1051,1277,1295,1398,1445,1604,1785,1845,1942,2335,2523,2529,2625,2737,2932,3071,3146,3169,3329,3479,3491,3552,3566,3654,3655,3659,3716,3911,3956,3987,4221,4763,4851,5054,5074,5270,5329,5573,5580,5598,5613,5724,5795,5879,5921,5970,6188,6657,6659,6662,6666,6777,6789,7037,7040,7057,7189,7412,7422,7474,8322,8379,8651,8728,8740,8744,8751,8754,8…	ABL2,ACTG1,ACTN4,ADA,AKT1,APOA1,RHOA,ARHGDIA,ARHGDIG,ATM,BMI1,CASP3,CD4,CD36,CDK6,CEBPB,COL1A1,COL8A1,CRK,CSK,CD55,DNM2,DUSP3,EFNA1,FN1,FUT1,FUT7,GATA3,GLI3,GSK3B,NCKAP1L,HMGB1,FOXA1,HSPD1,IGF1,CCN1,IL1A,IL4R,IRAK1,ITGA6,IRF1,JAK1,LAMA5,LGALS1,LIMS1,MEN1,NF1,NOTCH1,SERPINE1,PAWR,SERPINE2,PLAUR,PRKAR1A,PRKCD,MAPK7,PRKX,PTAFR,PTPRJ,RAC1,RASA1,RELA,RPS3,SOX2,SOX4,SOX9,SOX12,STAT5B,STK4,TFRC,TGFB1,TH…
5_Member	GO Biological Processes	GO:0050865	regulation of cell activation	-24.6255	-21.5648	99/650	100,196,207,387,472,639,648,814,836,920,933,952,1026,1051,1141,1445,1604,1845,2175,2625,2648,2729,2737,3071,3146,3329,3479,3537,3538,3539,3542,3552,3566,3659,3949,3956,4282,4352,4846,5074,5156,5270,5359,5573,5580,5724,6095,6188,6195,6655,6659,6666,6777,6813,7037,7040,7057,7128,7189,7301,7412,7474,8379,8399,8651,8740,8744,8877,8915,9306,9479,10451,10666,10673,11027,23308,23513,25807,26762,28834,50…	ADA,AHR,AKT1,RHOA,ATM,PRDM1,BMI1,CAMK4,CASP3,CD4,CD22,CD38,CDKN1A,CEBPB,CHRNB2,CSK,CD55,DUSP3,FANCA,GATA3,KAT2A,GCLC,GLI3,NCKAP1L,HMGB1,HSPD1,IGF1,IGLC1,IGLC2,IGLC3,IGLC6,IL1A,IL4R,IRF1,LDLR,LGALS1,MIF,MPL,NOS3,PAWR,PDGFRA,SERPINE2,PLSCR1,PRKAR1A,PRKCD,PTAFR,RORA,RPS3,RPS6KA1,SOS2,SOX4,SOX12,STAT5B,STXBP2,TFRC,TGFB1,THBS1,TNFAIP3,TRAF6,TYRO3,VCAM1,WNT5A,MAD1L1,PLA2G10,SOCS1,TNFSF14,TNFSF9,SPHK1,B…
5_Member	GO Biological Processes	GO:0045785	positive regulation of cell adhesion	-21.2384	-18.4677	74/437	100,207,335,387,472,648,920,948,1021,1295,1398,1445,1604,1785,2335,2523,2529,2625,2737,2932,3071,3146,3169,3329,3479,3491,3552,3566,3654,3655,3716,3956,3987,5329,5724,5795,5879,5970,6188,6657,6659,6666,6777,6789,7037,7189,7412,7422,7474,8651,8728,8740,8744,8754,8915,9530,9806,10272,10451,10673,10725,23308,27185,50848,51206,54361,57178,79576,80005,80381,89780,91663,126259,140885	ADA,AKT1,APOA1,RHOA,ATM,BMI1,CD4,CD36,CDK6,COL8A1,CRK,CSK,CD55,DNM2,FN1,FUT1,FUT7,GATA3,GLI3,GSK3B,NCKAP1L,HMGB1,FOXA1,HSPD1,IGF1,CCN1,IL1A,IL4R,IRAK1,ITGA6,JAK1,LGALS1,LIMS1,PLAUR,PTAFR,PTPRJ,RAC1,RELA,RPS3,SOX2,SOX4,SOX12,STAT5B,STK4,TFRC,TRAF6,VCAM1,VEGFA,WNT5A,SOCS1,ADAM19,TNFSF14,TNFSF9,ADAM9,BCL10,BAG4,SPOCK2,FSTL3,VAV3,TNFSF13B,NFAT5,ICOSLG,DISC1,F11R,GP6,WNT4,ZMIZ1,NKAP,DOCK5,CD276,WNT3A,…
5_Member	GO Biological Processes	GO:0002694	regulation of leukocyte activation	-21.0612	-18.3623	89/606	100,196,207,387,472,639,648,814,836,920,933,952,1026,1051,1141,1445,1604,1845,2175,2625,2648,2737,3071,3146,3329,3479,3537,3538,3539,3542,3552,3566,3659,3949,3956,4282,4352,5074,5359,5573,5724,6095,6188,6655,6659,6666,6777,6813,7037,7040,7057,7128,7189,7301,7412,7474,8379,8399,8651,8740,8744,8877,8915,9306,9479,10451,10666,10673,23308,23513,25807,26762,28834,54900,55183,57162,57178,57181,57817,64…	ADA,AHR,AKT1,RHOA,ATM,PRDM1,BMI1,CAMK4,CASP3,CD4,CD22,CD38,CDKN1A,CEBPB,CHRNB2,CSK,CD55,DUSP3,FANCA,GATA3,KAT2A,GLI3,NCKAP1L,HMGB1,HSPD1,IGF1,IGLC1,IGLC2,IGLC3,IGLC6,IL1A,IL4R,IRF1,LDLR,LGALS1,MIF,MPL,PAWR,PLSCR1,PRKAR1A,PTAFR,RORA,RPS3,SOS2,SOX4,SOX12,STAT5B,STXBP2,TFRC,TGFB1,THBS1,TNFAIP3,TRAF6,TYRO3,VCAM1,WNT5A,MAD1L1,PLA2G10,SOCS1,TNFSF14,TNFSF9,SPHK1,BCL10,SOCS6,MAPK8IP1,VAV3,CD226,TNFSF13B,…
5_Member	GO Biological Processes	GO:0022407	regulation of cell-cell adhesion	-19.2293	-16.7001	72/450	100,207,335,387,648,836,920,1051,1445,1604,1845,2529,2625,2737,3071,3146,3169,3329,3479,3552,3566,3654,3659,3716,3956,4851,5074,5270,5329,5573,5580,5598,5724,5970,6188,6657,6659,6666,6777,7037,7040,7189,7412,7422,7474,8379,8651,8728,8740,8744,8915,9306,10272,10673,10725,23308,23513,50488,50848,51206,54361,54900,57162,57178,79576,80381,84524,89780,91663,126259,140885,375056	ADA,AKT1,APOA1,RHOA,BMI1,CASP3,CD4,CEBPB,CSK,CD55,DUSP3,FUT7,GATA3,GLI3,NCKAP1L,HMGB1,FOXA1,HSPD1,IGF1,IL1A,IL4R,IRAK1,IRF1,JAK1,LGALS1,NOTCH1,PAWR,SERPINE2,PLAUR,PRKAR1A,PRKCD,MAPK7,PTAFR,RELA,RPS3,SOX2,SOX4,SOX12,STAT5B,TFRC,TGFB1,TRAF6,VCAM1,VEGFA,WNT5A,MAD1L1,SOCS1,ADAM19,TNFSF14,TNFSF9,BCL10,SOCS6,FSTL3,TNFSF13B,NFAT5,ICOSLG,SCRIB,MINK1,F11R,GP6,WNT4,LAX1,PELI1,ZMIZ1,NKAP,CD276,ZC3H8,WNT3A,M…
5_Member	GO Biological Processes	GO:0051249	regulation of lymphocyte activation	-18.1642	-15.7056	76/515	100,196,207,387,472,639,648,814,836,920,933,952,1026,1051,1141,1445,1604,1845,2175,2625,2648,2737,3071,3146,3329,3479,3537,3538,3539,3542,3552,3566,3659,3956,4282,4352,5074,5573,6188,6655,6659,6666,6777,7037,7040,7128,7189,7301,7412,8379,8651,8740,8744,8915,9306,9479,10451,10673,23308,23513,25807,28834,54900,55183,57162,57178,57181,64092,79155,79576,80381,84524,89780,126259,140885,100423062	ADA,AHR,AKT1,RHOA,ATM,PRDM1,BMI1,CAMK4,CASP3,CD4,CD22,CD38,CDKN1A,CEBPB,CHRNB2,CSK,CD55,DUSP3,FANCA,GATA3,KAT2A,GLI3,NCKAP1L,HMGB1,HSPD1,IGF1,IGLC1,IGLC2,IGLC3,IGLC6,IL1A,IL4R,IRF1,LGALS1,MIF,MPL,PAWR,PRKAR1A,RPS3,SOS2,SOX4,SOX12,STAT5B,TFRC,TGFB1,TNFAIP3,TRAF6,TYRO3,VCAM1,MAD1L1,SOCS1,TNFSF14,TNFSF9,BCL10,SOCS6,MAPK8IP1,VAV3,TNFSF13B,ICOSLG,SCRIB,RHBDD3,IGLC7,LAX1,RIF1,PELI1,ZMIZ1,SLC39A10,SAMSN…
5_Member	GO Biological Processes	GO:0007159	leukocyte cell-cell adhesion	-15.7302	-13.5617	59/371	100,207,337,387,648,836,920,1051,1445,1604,1845,2529,2625,2650,2737,3071,3146,3329,3479,3552,3566,3654,3659,3695,3956,5074,5573,5724,5970,6188,6280,6404,6659,6666,6777,7037,7189,7412,8379,8651,8740,8744,8915,9306,10673,10725,23308,23513,50848,54900,57162,57178,58494,79576,80381,84524,126259,140885,375056	ADA,AKT1,APOA4,RHOA,BMI1,CASP3,CD4,CEBPB,CSK,CD55,DUSP3,FUT7,GATA3,GCNT1,GLI3,NCKAP1L,HMGB1,HSPD1,IGF1,IL1A,IL4R,IRAK1,IRF1,ITGB7,LGALS1,PAWR,PRKAR1A,PTAFR,RELA,RPS3,S100A9,SELPLG,SOX4,SOX12,STAT5B,TFRC,TRAF6,VCAM1,MAD1L1,SOCS1,TNFSF14,TNFSF9,BCL10,SOCS6,TNFSF13B,NFAT5,ICOSLG,SCRIB,F11R,LAX1,PELI1,ZMIZ1,JAM2,NKAP,CD276,ZC3H8,TMIGD2,SIRPA,MIA3
5_Member	GO Biological Processes	GO:0042113	B cell activation	-15.3778	-13.2566	55/334	100,196,472,648,836,933,952,1026,1141,1235,1380,2033,2067,3071,3329,3537,3538,3539,3542,3955,3956,3981,4066,4282,4683,5074,5580,5795,6777,7037,7040,7128,7157,7412,7462,7528,8227,9156,9759,10451,10673,23308,28834,51341,54900,55183,55619,57162,57181,64092,79155,89780,139818,338376,100423062	ADA,AHR,ATM,BMI1,CASP3,CD22,CD38,CDKN1A,CHRNB2,CCR6,CR2,EP300,ERCC1,NCKAP1L,HSPD1,IGLC1,IGLC2,IGLC3,IGLC6,LFNG,LGALS1,LIG4,LYL1,MIF,NBN,PAWR,PRKCD,PTPRJ,STAT5B,TFRC,TGFB1,TNFAIP3,TP53,VCAM1,LAT2,YY1,AKAP17A,EXO1,HDAC4,VAV3,TNFSF13B,ICOSLG,IGLC7,ZBTB7A,LAX1,RIF1,DOCK10,PELI1,SLC39A10,SAMSN1,TNIP2,WNT3A,DOCK11,IFNE,IGLL5
5_Member	GO Biological Processes	GO:0046651	lymphocyte proliferation	-14.8585	-12.7888	50/290	100,196,472,648,836,933,952,977,1026,1051,1141,1380,1604,3071,3146,3329,3479,3552,3615,3659,4282,4352,5074,5532,5573,5580,6188,6655,6777,7037,7157,7189,7412,8379,8740,8744,9479,10451,10673,23308,23513,23705,54361,55716,57162,57181,80381,89780,126259,338376	ADA,AHR,ATM,BMI1,CASP3,CD22,CD38,CD151,CDKN1A,CEBPB,CHRNB2,CR2,CD55,NCKAP1L,HMGB1,HSPD1,IGF1,IL1A,IMPDH2,IRF1,MIF,MPL,PAWR,PPP3CB,PRKAR1A,PRKCD,RPS3,SOS2,STAT5B,TFRC,TP53,TRAF6,VCAM1,MAD1L1,TNFSF14,TNFSF9,MAPK8IP1,VAV3,TNFSF13B,ICOSLG,SCRIB,CADM1,WNT4,LMBR1L,PELI1,SLC39A10,CD276,WNT3A,TMIGD2,IFNE
5_Member	GO Biological Processes	GO:0032943	mononuclear cell proliferation	-14.6731	-12.6189	50/293	100,196,472,648,836,933,952,977,1026,1051,1141,1380,1604,3071,3146,3329,3479,3552,3615,3659,4282,4352,5074,5532,5573,5580,6188,6655,6777,7037,7157,7189,7412,8379,8740,8744,9479,10451,10673,23308,23513,23705,54361,55716,57162,57181,80381,89780,126259,338376	ADA,AHR,ATM,BMI1,CASP3,CD22,CD38,CD151,CDKN1A,CEBPB,CHRNB2,CR2,CD55,NCKAP1L,HMGB1,HSPD1,IGF1,IL1A,IMPDH2,IRF1,MIF,MPL,PAWR,PPP3CB,PRKAR1A,PRKCD,RPS3,SOS2,STAT5B,TFRC,TP53,TRAF6,VCAM1,MAD1L1,TNFSF14,TNFSF9,MAPK8IP1,VAV3,TNFSF13B,ICOSLG,SCRIB,CADM1,WNT4,LMBR1L,PELI1,SLC39A10,CD276,WNT3A,TMIGD2,IFNE
5_Member	GO Biological Processes	GO:0022409	positive regulation of cell-cell adhesion	-14.5868	-12.5431	49/284	100,207,387,648,920,1445,1604,2529,2625,2737,3071,3146,3169,3329,3479,3552,3566,3654,3716,3956,5329,5724,5970,6188,6657,6659,6666,6777,7037,7189,7412,7474,8651,8728,8740,8744,8915,10272,10673,10725,23308,50848,51206,57178,79576,80381,89780,126259,140885	ADA,AKT1,RHOA,BMI1,CD4,CSK,CD55,FUT7,GATA3,GLI3,NCKAP1L,HMGB1,FOXA1,HSPD1,IGF1,IL1A,IL4R,IRAK1,JAK1,LGALS1,PLAUR,PTAFR,RELA,RPS3,SOX2,SOX4,SOX12,STAT5B,TFRC,TRAF6,VCAM1,WNT5A,SOCS1,ADAM19,TNFSF14,TNFSF9,BCL10,FSTL3,TNFSF13B,NFAT5,ICOSLG,F11R,GP6,ZMIZ1,NKAP,CD276,WNT3A,TMIGD2,SIRPA
[truncated: 320 more rows]

## Sheet: CL4 Enrichment
GroupID	Category	Term	Description	LogP	Log(q-value)	InTerm_InList	Genes	Symbols
[truncated: 282 more rows]

## Sheet: CL5 Enrichment
GroupID	Category	Term	Description	LogP	Log(q-value)	InTerm_InList	Genes	Symbols
[truncated: 274 more rows]
