# Supplementary material for: Towards In Silico Identification of Genes Contributing to Similarity of Patients’ Multi-Omics Profiles: A Case Study of Acute Myeloid Leukemia
Source: Genes (Basel). 2023 Sep 13;14(9):1795. doi: 10.3390/genes14091795 (PMC10531350; doi:10.3390/genes14091795)
Supplement: Supplementary file 1 [file genes-14-01795-s001.zip › Table S3.xlsx]

## Sheet: Table S3
Table S3.	Full list of immune genes identified
	genes identified via intra-chromosonal interactions (intra)
gene	TCGA target genes (DB)
	genes identified via inter-chromosomal interactions (inter)
	miRNA targets (mi)
gene	immune genes found in top 125 features
	genes identified via both intra- and inter-chromosonal interactions
enrich 1	genes common to Go term "cytokine signalling in immune system"
inflam	inflammatory response genes from M5932
alpha	interferon alpha response genes from M5911
gamma	interferon gamma response from M5913
top5%degree	genes with top 5% of interactions
top1%degree	genes with top 1% of interactions
	Note that missing values in hg19 positions column indicate that
	they were not either given in TCGA or successfully lifted over hg18.

## Sheet: patients ID
patient TCGA id	Cluster
tcga-ab-2808	3
tcga-ab-2819	3
tcga-ab-2821	1
tcga-ab-2828	2
tcga-ab-2835	2
tcga-ab-2846	3
tcga-ab-2847	1
tcga-ab-2849	5
tcga-ab-2862	4
tcga-ab-2863	5
tcga-ab-2869	5
tcga-ab-2870	3
tcga-ab-2871	1
tcga-ab-2872	4
tcga-ab-2873	2
tcga-ab-2874	3
tcga-ab-2875	3
tcga-ab-2876	3
tcga-ab-2877	5
tcga-ab-2878	1
tcga-ab-2880	3
tcga-ab-2881	3
tcga-ab-2882	1
tcga-ab-2883	2
tcga-ab-2884	2
tcga-ab-2885	1
tcga-ab-2886	3
tcga-ab-2888	2
tcga-ab-2889	3
tcga-ab-2890	1
tcga-ab-2891	3
tcga-ab-2892	3
tcga-ab-2894	2
tcga-ab-2895	5
tcga-ab-2896	2
tcga-ab-2897	4
tcga-ab-2898	1
tcga-ab-2899	1
tcga-ab-2900	2
tcga-ab-2901	5
tcga-ab-2908	1
tcga-ab-2910	2
tcga-ab-2911	2
tcga-ab-2912	3
tcga-ab-2913	5
tcga-ab-2914	3
tcga-ab-2915	1
tcga-ab-2916	2
tcga-ab-2917	1
tcga-ab-2918	5
tcga-ab-2919	5
tcga-ab-2920	1
tcga-ab-2921	3
tcga-ab-2924	2
tcga-ab-2925	2
tcga-ab-2927	1
tcga-ab-2928	5
tcga-ab-2929	1
tcga-ab-2930	3
tcga-ab-2931	5
tcga-ab-2932	2
tcga-ab-2933	2
tcga-ab-2934	3
tcga-ab-2935	1
tcga-ab-2936	1
tcga-ab-2937	3
tcga-ab-2939	3
tcga-ab-2940	3
tcga-ab-2941	1
tcga-ab-2942	3
tcga-ab-2943	1
tcga-ab-2944	5
tcga-ab-2946	3
tcga-ab-2948	2
tcga-ab-2949	3
tcga-ab-2950	3
tcga-ab-2952	1
tcga-ab-2955	3
tcga-ab-2956	2
tcga-ab-2959	1
tcga-ab-2963	2
tcga-ab-2965	2
tcga-ab-2966	3
tcga-ab-2970	1
tcga-ab-2971	2
tcga-ab-2973	2
tcga-ab-2975	5
tcga-ab-2976	5
tcga-ab-2977	5
tcga-ab-2979	3
tcga-ab-2980	4
tcga-ab-2981	2
tcga-ab-2982	4
tcga-ab-2983	1
tcga-ab-2984	5
tcga-ab-2986	5
tcga-ab-2987	2
tcga-ab-2988	2
tcga-ab-2990	5
tcga-ab-2991	4
tcga-ab-2992	1
tcga-ab-2995	1
tcga-ab-2996	1
tcga-ab-2998	4
tcga-ab-2999	4
tcga-ab-3001	4
tcga-ab-3002	1
tcga-ab-3007	4
tcga-ab-3008	3
tcga-ab-3009	5
tcga-ab-3011	5
tcga-ab-3012	4

## Sheet: Cluster1
Feature	NDE	TCGA DB targets	hg19 positions				all genes	found in/via	germ targets	germ genes	somatic	enrich1	inflam	alpha	gamma	top5%degree	top1%degree		germ+somatic
cg27069753	0.0146	CELA3B;CELA3B	1	558	558		ACTB		0	0	0	0	0	0	0	1	1		AKR7A2
cg24331162	0.0127	SYT8;SYT8;SYT8;SYT8;SYT8;SYT8;SYT8;SYT8;SYT8;SYT8;SYT8;SYT8;SYT8	11	47	47		AKT1		1	0	0	1	0	0	0	1	1		CNOT6L
cg15756091	0.0112	RGSL1;RGSL1;RGSL1;RGSL1;RGSL1;RGSL1;RGSL1	1	4561	4561		CCND1		0	0	0	1	0	0	0	1	1		CRISPLD2
cg04797496	0.011	PCDH12;PCDH12;PCDH12;RNF14;RNF14	5	3534	3534		ESR1		0	1	0	0	0	0	0	1	1		GALNT2
cg07109801	0.0106	DALRD3;DALRD3;DALRD3;DALRD3;MIR425;NDUFAF3;NDUFAF3;NDUFAF3;NDUFAF3	3	1227	1227		HIF1A		0	0	0	1	1	0	1	1	1		PEAR1
cg00645579	0.0088	CDHR5;CDHR5;IRF7;IRF7;IRF7;IRF7;IRF7;IRF7;IRF7;IRF7;IRF7;IRF7;IRF7	11	16	16		HRAS		0	0	0	1	0	0	0	1	1		RUNX1
cg10161121	0.0086	FASLG;FASLG	1	4316	4316		IL1B		0	0	0	1	1	0	0	1	1		IKZF3
cg14376424	0.0084	FAM71B;ITK	5	3915	3915		IL6		0	0	0	1	1	0	1	1	1
cg07485588	0.0079						NOTCH1		1	0	0	0	0	0	0	1	1
cg02649337	0.0076						PTEN		0	0	0	0	0	0	0	1	1
cg08411049	0.0074	SERPINB5;SERPINB5;SERPINB5	18	1529	1529		RPS27A		0	0	0	1	0	0	0	1	1
cg18457737	0.0074	SPATA19;SPATA19	11	3343	3343		STAT3		0	0	0	1	0	0	1	1	1
cg24870391	0.0073	CCL11	17	816	816		TP53		0	0	1	1	0	0	0	1	1
ENSG00000243238.1	0.0072						UBC		0	0	0	1	0	0	0	1	1
cg11504740	0.0069	CABP4;CABP4;CABP4;CABP4;CABP4;GPR152	11	1681	1681		VEGFA		0	0	0	1	0	0	0	1	1
cg16454349	0.0065	SEPT12;SEPT12;SEPT12;SEPT12;SEPT12;SEPT12;SEPT12;SMIM22;SMIM22;SMIM22;SMIM22;SMIM22	16	121	121		A1CF		0	1	0	0	0	0	0	0	0
hsa-mir-1275	0.0065						AASDHPPT		0	0	0	0	0	0	0	0	0
cg07150830	0.0064	NOS2;RP1-66C13.4	17	654	654		ABCA7		1	0	0	0	0	0	0	0	0
cg07271264	0.0059	MYOD1	11	444	444		ABCB10		0	0	0	0	0	0	0	0	0
cg25061755	0.0058	STON1;STON1;STON1;STON1-GTF2A1L;STON1-GTF2A1L;STON1-GTF2A1L;STON1-GTF2A1L;STON1-GTF2A1L	2	1221	1221		ABCC6		0	0	0	0	0	0	0	0	0
cg15776355	0.0053	C1R;C1R;C1R;C1R;C1R;C1R;C1R;C1R;C1R;C1R;C1R;C1R;C1RL	12	182	182		ABCF2		0	0	0	0	0	0	0	0	0
cg21542793	0.0053	ADRA2B	2	2420	2420		ABO		0	0	0	0	0	0	0	0	0
cg08420900	0.0049						ACAA1		0	0	0	0	0	0	0	0	0
cg26209676	0.0048	CCDC106;ZNF580;ZNF580;ZNF580;ZNF581;ZNF581;ZNF581;ZNF581	19	1404	1404		ACER2		0	0	0	0	0	0	0	0	0
cg13019092	0.0046	PDZK1;PDZK1;PDZK1	1	3644	3644		ACOX1		0	0	0	0	0	0	0	0	0
cg24365867	0.0043	MRVI1;MRVI1;MRVI1;MRVI1;MRVI1;MRVI1;MRVI1;MRVI1;MRVI1;MRVI1;MRVI1;MRVI1	11	268	268		ACP6		0	0	0	0	0	0	0	0	0
cg25978208	0.0043	RP11-385H1.1;SNRPN;SNRPN	15	628	628		ACSF3		0	0	0	0	0	0	0	0	0
cg17705056	0.0041	PQLC1;PQLC1;PQLC1;PQLC1;PQLC1;PQLC1;PQLC1;PQLC1;PQLC1	18	1943	1943		ACSL1		0	0	0	0	0	0	0	0	0
ENSG00000197766.6	0.004						ACSL4		0	0	0	0	0	0	0	0	0
hsa-mir-6514	0.0039						ACTC1		0	0	0	0	0	0	0	0	0
cg10035272	0.0037	VTA1;VTA1;VTA1;VTA1	6	3562	3562		ACTN4		0	0	0	0	0	0	0	0	0
cg00392257	0.0036	ISG20L2;ISG20L2;ISG20L2;ISG20L2;RRNAD1	1	3918	3918		ACTR2		0	0	0	0	0	0	0	0	0
cg13851211	0.0036	ADCY7;ADCY7;ADCY7;ADCY7;ADCY7;ADCY7;ADCY7;ADCY7;ADCY7;ADCY7;ADCY7;ADCY7	16	1259	1259		ACVR1B		0	0	0	0	1	0	0	0	0
cg27238470	0.0036	EDN2;EDN2;EDN2;EDN2;EDN2	1	1049	1049		ADAM10		0	0	0	0	0	0	0	0	0
cg20483374	0.0035	C1QTNF5;C1QTNF5;MFRP;MFRP	11	2981	2981		ADAM15		1	0	0	0	0	0	0	0	0
cg22467071	0.0034						ADAM19	inter+mi	1	0	0	0	0	0	0	0	0
cg03139377	0.0033	SLC6A12;SLC6A12;SLC6A12;SLC6A12;SLC6A12;SLC6A12;SLC6A12	12	9	9		ADAMTS13		0	0	0	0	0	0	0	0	0
cg14003512	0.0033						ADAR	inter+mi	0	0	0	1	0	1	1	0	0
cg21801378	0.0033	CELF6;CELF6;CELF6;CELF6;RP11-106M3.2;RP11-106M3.3	15	1816	1816		ADAT2		0	0	0	0	0	0	0	0	0
cg25629694	0.0033	SMURF2;SMURF2;SMURF2;SMURF2;SMURF2	17	1567	1567		ADCY5		0	0	0	0	0	0	0	0	0
hsa-mir-106a	0.0033						ADCY7		1	0	0	0	0	0	0	0	0
cg02765820	0.0032	C3orf22;C3orf22	3	3157	3157		ADCYAP1		0	0	0	0	0	0	0	0	0
cg03355526	0.0032	ZNF454;ZNF454;ZNF454	5	4460	4460		ADIPOQ		0	0	0	0	0	0	0	0	0
cg23509027	0.0032						ADRBK1		1	0	0	0	0	0	0	0	0
cg01568335	0.0031	COX5B;COX5B;COX5B;COX5B	2	2457	2457		AEN		0	0	0	0	0	0	0	0	0
cg06570843	0.0031	FABP2	4	3007	3007		AGL		0	0	0	0	0	0	0	0	0
cg08448751	0.0031	SEMA3G;SEMA3G;SEMA3G	3	1312	1312		AGPAT5		0	0	0	0	0	0	0	0	0
cg18450227	0.0031	MAPK4;MAPK4;MAPK4;MAPK4;MAPK4	18	1205	1205		AHCY		0	0	0	0	0	0	0	0	0
cg20244073	0.0031	MID1;MID1	23	272	272		AHSA2		0	0	0	0	0	0	0	0	0
hsa-mir-339	0.0031						AIP		0	0	0	1	0	0	0	0	0
cg00725143	0.003						AIRE		0	0	0	0	0	0	0	0	0
cg05168404	0.003	SLC29A4;SLC29A4;SLC29A4;SLC29A4;SLC29A4	7	134	134		AKAP10		0	0	0	0	0	0	0	0	0
cg11037424	0.003	PRPF6;SAMD10;SAMD10;ZNF512B;ZNF512B	20	1566	1566		AKAP11		0	0	0	0	0	0	0	0	0
cg24941797	0.003	CAPN10;CAPN10;CAPN10;CAPN10;CAPN10;CAPN10;CAPN10;CAPN10;CAPN10;CAPN10;CAPN10-AS1	2	6039	6039		AKR7A2		0	1	1	0	0	0	0	0	0
cg04511195	0.0029	FZR1;FZR1;FZR1;FZR1;FZR1	19	89	89		ALAS1		0	0	0	0	0	0	0	0	0
cg14741922	0.0029	SCGB2A2;SCGB2A2	11	1551	1551		ALCAM		0	0	0	0	0	0	0	0	0
cg20974196	0.0029	CFD;CFD	19	22	22		ALDH1A1		0	0	0	0	0	0	0	0	0
cg21992250	0.0029	SLC15A3;SLC15A3;SLC15A3;SLC15A3;SLC15A3	11	1518	1518		ALDH5A1		0	0	0	0	0	0	0	0	0
cg25770411	0.0029	GTF2IRD1;GTF2IRD1;GTF2IRD1;GTF2IRD1;GTF2IRD1	7	1849	1849		ALDH6A1		0	0	0	0	0	0	0	0	0
cg00578575	0.0028						ALX4		1	1	0	0	0	0	0	0	0
cg12213910	0.0028	RAET1E;RAET1E;RAET1E;RAET1E;RAET1E;RAET1E;RAET1E-AS1;RAET1E-AS1;RAET1E-AS1	6	3756	3756		AMD1		0	0	0	0	0	0	0	0	0
cg01230160	0.0027	DGKD;DGKD;DGKD	2	5857	5857		AMOTL1		0	0	0	0	0	0	0	0	0
cg01880569	0.0027	CDH13;CDH13;CDH13;CDH13;CDH13;CDH13;CDH13;CDH13;CDH13;CDH13;CDH13;CDH13	16	2067	2067		ANK1		1	1	0	0	0	0	0	0	0
cg03312532	0.0027	KIF7;TICRR;TICRR	15	2255	2255		ANKRD6		0	0	0	0	0	0	0	0	0
cg09345431	0.0027	ARFGEF2	20	1189	1189		ANLN		0	0	0	0	0	0	0	0	0
cg09837977	0.0027	IMMP2L;IMMP2L;IMMP2L;IMMP2L;IMMP2L;IMMP2L;LRRN3;LRRN3;LRRN3;LRRN3;LRRN3	7	2769	2769		ANO6		0	0	0	0	0	0	0	0	0
cg12858514	0.0027	PADI3	1	440	440		ANPEP		1	0	0	0	0	0	0	0	0
cg16050957	0.0027	RBBP6;RBBP6;RBBP6;RBBP6;RBBP6;RBBP6;RBBP6;RBBP6	16	614	614		ANXA9		0	0	0	0	0	0	0	0	0
cg24331079	0.0027	STAT4;STAT4;STAT4;STAT4;STAT4;STAT4;STAT4;STAT4	2	4801	4801		AP1S2		0	0	0	0	0	0	0	0	0
cg05547500	0.0026	TXNDC2;TXNDC2;TXNDC2;TXNDC2;TXNDC2;TXNDC2	18	248	248		AP2S1		0	0	0	0	0	0	0	0	0
cg11068096	0.0026						APC		0	0	0	0	0	0	0	0	0
cg12441928	0.0026	CCR1;CCR3	3	1157	1157		APEX1		1	0	0	0	0	0	0	0	0
cg19780563	0.0026	EXOC6	10	2365	2365		APOBEC3F		0	0	0	0	0	0	0	0	0
cg22898761	0.0026						APOC3		0	0	0	0	0	0	0	0	0
cg01550148	0.0025	CTC-203F4.2;H2AFY;H2AFY;H2AFY;H2AFY;H2AFY;H2AFY;H2AFY;H2AFY;H2AFY;H2AFY;H2AFY;H2AFY;H2AFY	5	3369	3369		APOH		0	0	0	0	0	0	0	0	0
cg15175577	0.0025	RTCB;RTCB;RTCB	22	821	821		APP		0	0	0	1	0	0	0	1	0
cg16612699	0.0025	OR8B8	11	3108	3108		AR		0	0	0	0	0	0	0	1	0
cg03017264	0.0024	NFAM1;NFAM1	22	1071	1071		ARFGEF1		0	0	0	0	0	0	0	0	0
cg17049328	0.0024	GHRH;GHRH;GHRH	20	898	898		ARFGEF2	inter+DB+mi	0	0	0	0	0	0	0	0	0
cg18873386	0.0024	DLX5;DLX5;DLX5	7	2417	2417		ARHGAP19		0	0	0	0	0	0	0	0	0
cg19569684	0.0024	MZB1;MZB1;MZB1;MZB1;MZB1;MZB1;MZB1;PROB1	5	3469	3469		ARHGAP5		0	0	0	0	0	0	0	0	0
cg22045288	0.0024	C10orf91;C10orf91;C10orf91	10	3357	3357		ARHGDIA	inter+mi	0	0	0	0	0	0	0	0	0
cg23058901	0.0024	ALX4	11	1109	1109		ARHGEF11		0	0	0	0	0	0	0	0	0
cg23219570	0.0024	FGF23	12	113	113		ARID3A		1	0	0	0	0	0	0	0	0
cg23838531	0.0024	TTC19;TTC19;TTC19;TTC19;TTC19;TTC19;ZSWIM7;ZSWIM7;ZSWIM7;ZSWIM7;ZSWIM7;ZSWIM7;ZSWIM7;ZSWIM7;ZSWIM7;ZSWIM7;ZSWIM7;ZSWIM7;ZSWIM7;ZSWIM7;ZSWIM7;ZSWIM7	17	398	398		ARID4B		0	0	0	0	0	0	0	0	0
cg05019152	0.0023	RMDN3;RMDN3;RMDN3;RMDN3;RMDN3	15	1027	1027		ARIH2		0	0	0	0	0	0	0	0	0
cg07123548	0.0023	HIPK4	19	1023	1023		ARL3		0	0	0	0	0	0	0	0	0
cg13406950	0.0023						ARL4C		0	0	0	0	0	0	0	0	0
cg13531460	0.0023	GPR55;GPR55;GPR55;GPR55;GPR55	2	5795	5795		ARL6IP6		0	0	0	0	0	0	0	0	0
cg26610808	0.0023	BLOC1S2;BLOC1S2;BLOC1S2;BLOC1S2;BLOC1S2	10	2552	2552		ARPC4		1	0	0	0	0	0	0	0	0
hsa-mir-192	0.0023						ARRDC1		1	0	0	0	0	0	0	0	0
cg05522383	0.0022	PITX2;PITX2;PITX2;PITX2;PITX2;PITX2;PITX2;PITX2;PITX2	4	2789	2789		ASGR2		0	0	0	0	0	0	0	0	0
cg12287813	0.0022	GCC2;GCC2;GCC2;GCC2;GCC2;GCC2	2	2727	2727		ASPH		0	0	0	0	0	0	0	0	0
cg15814508	0.0022	MED12L;MED12L;MED12L;MED12L;P2RY14;P2RY14	3	3775	3775		ATF1		0	0	0	1	0	0	0	0	0
cg21922731	0.0022	HSD17B6;HSD17B6;HSD17B6;HSD17B6;HSD17B6;HSD17B6;HSD17B6;HSD17B6	12	1429	1429		ATF7IP		0	0	0	0	0	0	0	0	0
cg21926138	0.0022	PIFO;PIFO;PIFO	1	2798	2798		ATG12		0	0	0	0	0	0	0	0	0
cg24642523	0.0022	HSPA2;HSPA2	14	1626	1626		ATG16L1		0	0	1	0	0	0	0	0	0
cg01197831	0.0021	FBP2	9	2434	2434		ATG7		0	0	0	0	0	0	0	0	0
cg04457794	0.0021	BX571818.1;CTSE;CTSE	1	5158	5158		ATIC		0	0	0	0	0	0	0	0	0
cg09571369	0.0021	MED12L;MED12L;MED12L;MED12L;P2RY14;P2RY14	3	3775	3775		ATM		0	0	0	0	0	0	0	1	0
cg11375102	0.0021	IFT140;IFT140;IFT140;IFT140;TMEM204;TMEM204	16	40	40		ATP10D		0	0	0	0	0	0	0	0	0
cg12459502	0.0021	BCL2;BCL2	18	1523	1523		ATP1B3		0	0	0	0	0	0	0	0	0
cg19682367	0.0021	TPRG1;TPRG1;TPRG1;TPRG1	3	4723	4723		ATP2A2		0	0	0	0	1	0	0	0	0
cg21578541	0.0021	RP11-330H6.5;RP11-330H6.5;TLR9	3	1307	1307		ATP2B4		0	0	0	0	0	0	0	0	0
cg21816539	0.0021	GRIK1;GRIK1;GRIK1;GRIK1;GRIK1;GRIK1;GRIK1;GRIK1	21	783	783		ATP5B		0	0	0	0	0	0	0	0	0
cg23877786	0.0021	RPL13;RPL13;RPL13;RPL13;RPL13;RPL13;RPL13;RPL13;RPL13;RPL13;RPL13;RPL13;RPL13;SNORD68	16	2241	2241		ATP5F1		0	0	0	0	0	0	0	0	0
cg26955850	0.0021	OXT	20	77	77		ATP5L		0	0	0	0	0	0	0	0	0
ENSG00000211877.1	0.0021						ATP6V1G1		1	0	0	0	0	0	0	0	0
ENSG00000148346.10	0.0021						ATP7A		0	0	0	0	0	0	0	0	0
cg04311964	0.002	LYPD2	8	3596	3596		ATP8B2		0	0	0	0	0	0	0	0	0
cg04520391	0.002						ATPIF1		0	0	0	0	0	0	0	0	0
cg05985767	0.002	ANPEP;ANPEP;ANPEP;ANPEP	15	2259	2259		ATRNL1		0	0	0	0	0	0	0	0	0
cg07398429	0.002	MAGEB4	23	757	757		ATXN7		0	0	0	0	0	0	0	0	0
cg07619076	0.002	LANCL2;LANCL2	7	1386	1386		AURKAIP1		0	0	0	0	0	0	0	0	0
cg10569414	0.002	ZNF295-AS1;ZNF295-AS1;ZNF295-AS1	21	1087	1087		AVP		1	0	0	0	0	0	0	0	0
cg11474811	0.002	TRPM5;TRPM5;TRPM5;TRPM5	11	62	62		AVPR1B		0	0	0	0	0	0	0	0	0
cg12514506	0.002	OSBPL5;OSBPL5;OSBPL5;OSBPL5;OSBPL5;OSBPL5;OSBPL5	11	79	79		AXL		0	0	0	0	1	0	0	0	0
cg17356112	0.002	FLJ40288;PLXNA4	7	3309	3309		AZIN1		0	0	0	0	0	0	0	0	0
cg17813891	0.002	CTD-2376I20.1;EVL;EVL;EVL;EVL;EVL;EVL;EVL;EVL;EVL;EVL;EVL;EVL	14	2514	2514		AZU1		0	1	0	0	0	0	0	0	0
cg19700658	0.002	UCP3;UCP3	11	1843	1843		B2M		0	0	0	1	0	1	1	0	0
cg23812886	0.002	RP11-552E4.2;SSX5;SSX5;SSX5;SSX5	23	1202	1202		B3GALNT1		0	0	0	0	0	0	0	0	0
hsa-mir-32	0.002						B3GNT5		0	0	0	0	0	0	0	0	0
ENSG00000165092.11	0.002						B4GALT6		0	0	0	0	0	0	0	0	0
cg00815440	0.0019	CTB-32O4.2;CTB-32O4.2;UQCRFS1	19	743	743		BACE1		0	0	0	0	0	0	0	0	0
cg01673583	0.0019						BACH1		0	0	0	0	0	0	0	0	0
							BAD		0	0	0	0	0	0	0	0	0
							BAG2		0	0	0	0	0	0	0	0	0
							BAG5		0	0	0	0	0	0	0	0	0
							BAK1		0	0	0	0	0	0	0	0	0
							BARD1		0	0	0	0	0	0	0	0	0
							BBS7		0	0	0	0	0	0	0	0	0
							BCAN		0	0	0	0	0	0	0	0	0
							BCL10		1	0	0	0	0	0	0	0	0
							BCL11A		0	0	0	0	0	0	0	0	0
							BCL11B		0	0	0	0	0	0	0	0	0
							BCL2	intra+DB+mi	0	0	0	1	0	0	0	0	0
							BCL2L11		0	0	0	1	0	0	0	1	0
							BCL2L13		1	0	0	0	0	0	0	0	0
							BCL2L15		0	0	0	0	0	0	0	0	0
							BCL2L2		0	0	0	0	0	0	0	0	0
							BCL6		0	0	0	1	0	0	0	1	0
							BCOR		0	0	0	0	0	0	0	0	0
							BGLAP	inter+mi	0	0	0	0	0	0	0	0	0
							BICD2		0	0	0	0	0	0	0	0	0
							BIVM		0	0	0	0	0	0	0	0	0
							BLCAP		0	0	0	0	0	0	0	0	0
							BLM		1	0	0	0	0	0	0	0	0
							BLOC1S2		0	0	0	0	0	0	0	0	0
							BLOC1S3		0	0	0	0	0	0	0	0	0
							BMI1		0	0	0	0	0	0	0	0	0
							BMP2		0	0	0	0	0	0	0	0	0
							BMP8A		0	0	0	0	0	0	0	0	0
							BMP8B		0	0	0	0	0	0	0	0	0
							BMPR1A		0	0	0	0	0	0	0	0	0
							BMPR2		0	0	0	0	0	0	0	0	0
							BNIP2		0	0	0	0	0	0	0	0	0
							BNIPL		0	0	0	0	0	0	0	0	0
							BRCA1		0	0	0	0	0	0	0	1	0
							BRCA2		0	0	0	0	0	0	0	1	0
							BTC		0	0	0	0	0	0	0	0	0
							BTF3L4		0	0	0	0	0	0	0	0	0
							BTG2		0	0	0	0	1	0	0	0	0
							BUB1		0	0	0	0	0	0	0	0	0
							BUB1B		0	0	0	0	0	0	0	0	0
							BUB3		0	0	0	0	0	0	0	0	0
							BYSL		0	0	0	0	0	0	0	0	0
							BZW1		0	0	0	0	0	0	0	0	0
							C12orf57		1	0	0	0	0	0	0	0	0
							C19orf53		0	0	0	0	0	0	0	0	0
							C19orf6		1	0	0	0	0	0	0	0	0
							C1D		0	0	0	0	0	0	0	0	0
							C1GALT1C1		0	0	0	0	0	0	0	0	0
							C1QTNF3		0	0	0	0	0	0	0	0	0
							C1QTNF5		1	0	0	0	0	0	0	0	0
							C1R		0	0	0	0	0	0	1	0	0
							C1RL		0	0	0	0	0	0	0	0	0
							C1S		0	0	0	0	0	1	1	0	0
							C21orf91		0	0	0	0	0	0	0	0	0
							C3orf38		0	0	0	0	0	0	0	0	0
							C5orf15		0	0	0	0	0	0	0	0	0
							C5orf30		0	0	0	0	0	0	0	0	0
							C6orf62		0	0	0	0	0	0	0	0	0
							CAB39	intra+mi	0	0	0	0	0	0	0	0	0
							CACTIN		0	0	0	0	0	0	0	0	0
							CADM1		0	0	0	0	0	0	0	0	0
							CADM2		0	1	0	0	0	0	0	0	0
							CADPS2		0	0	0	0	0	0	0	0	0
							CALCOCO2		0	0	0	0	0	0	0	0	0
							CALM2		0	0	0	0	0	0	0	0	0
							CALR	inter+mi	0	0	0	0	0	0	0	1	0
							CAMK2A	inter+mi	1	0	0	1	0	0	0	0	0
							CAMK4		0	0	1	0	0	0	0	0	0
							CAND1		0	0	0	0	0	0	0	0	0
							CANX		0	0	0	1	0	0	0	0	0
							CAPN10		0	0	0	0	0	0	0	0	0
							CAPN7		0	0	0	0	0	0	0	0	0
							CAPRIN2		0	0	0	0	0	0	0	0	0
							CAPZA1		0	0	0	1	0	0	0	0	0
							CAPZA2		0	0	0	0	0	0	0	0	0
							CARD6		0	0	0	0	0	0	0	0	0
							CARD8		1	0	0	0	0	0	0	0	0
							CASD1		0	0	0	0	0	0	0	0	0
							CASP7		0	0	0	0	0	0	1	0	0
							CAV1		0	0	0	0	0	0	0	1	0
							CBL		1	1	0	1	0	0	0	1	0
							CBS		0	0	0	0	0	0	0	0	0
							CCDC14		0	0	0	0	0	0	0	0	0
							CCDC6		0	1	0	0	0	0	0	0	0
							CCL11		0	0	0	1	0	0	0	0	0
							CCL5		0	0	0	1	1	0	1	0	0
							CCND2		0	0	0	0	0	0	0	0	0
							CCNDBP1		0	0	0	0	0	0	0	0	0
							CCNE1		0	0	0	0	0	0	0	0	0
							CCNG1		0	0	0	0	0	0	0	0	0
							CCNL2		0	0	0	0	0	0	0	0	0
							CCNT1		0	0	0	0	0	0	0	0	0
							CCNY		0	0	0	0	0	0	0	0	0
							CCR1		0	0	0	1	0	0	0	0	0
							CCR2		0	0	0	1	0	0	0	0	0
							CCR3		0	0	0	0	0	0	0	0	0
							CCR6		0	0	0	0	0	0	0	0	0
							CCT3		0	0	0	0	0	0	0	0	0
							CCT6A		0	0	0	0	0	0	0	0	0
							CD160		0	0	0	0	0	0	0	0	0
							CD164		0	0	0	0	0	0	0	0	0
							CD180		0	0	0	0	0	0	0	0	0
							CD226		0	0	0	0	0	0	0	0	0
							CD28		0	0	0	0	0	0	0	0	0
							CD2AP		0	0	0	0	0	0	0	0	0
							CD3D		0	0	0	0	0	0	0	0	0
							CD40LG		0	0	1	1	0	0	0	0	0
							CD44		0	0	0	1	0	0	0	1	0
							CD47		0	0	0	0	0	1	0	0	0
							CD55		0	0	0	0	1	0	0	0	0
							CD6		0	0	0	0	0	0	0	0	0
							CD69		0	0	0	0	1	0	1	0	0
							CD7		0	0	0	0	0	0	0	0	0
							CD72		1	0	0	0	0	0	0	0	0
							CD81		1	0	0	0	0	0	0	0	0
							CD83		0	0	0	0	0	0	0	0	0
							CD93		0	0	0	0	0	0	0	0	0
							CDADC1		0	0	0	0	0	0	0	0	0
							CDC14A		0	0	0	0	0	0	0	0	0
							CDC25A		1	0	0	0	0	0	0	0	0
							CDC42EP3		0	0	0	0	0	0	0	0	0
							CDC42SE1		0	0	0	0	0	0	0	0	0
							CDH13		0	1	0	0	0	0	0	0	0
							CDHR5		1	0	0	0	0	0	0	0	0
							CDK19		0	0	0	0	0	0	0	0	0
							CDK2AP2		0	0	0	0	0	0	0	0	0
							CDK4		0	0	0	0	0	0	0	1	0
							CDK5R1		0	0	0	0	0	0	0	0	0
							CDKN1A		0	0	0	1	1	0	1	1	0
							CDKN1B		1	0	0	1	0	0	0	1	0
							CDKN2A		0	0	0	0	0	0	0	1	0
							CDKN2D		0	0	0	0	0	0	0	0	0
							CDON		0	0	0	0	0	0	0	0	0
							CDX1		0	0	0	0	0	0	0	0	0
							CDX2		0	0	0	0	0	0	0	0	0
							CENPK		0	0	0	0	0	0	0	0	0
							CEP170		0	0	0	0	0	0	0	0	0
							CERCAM		0	0	0	0	0	0	0	0	0
							CFD	DB+intra+top gene	0	1	0	0	0	0	0	0	0
							CHD7		0	0	0	0	0	0	0	0	0
							CHIA		1	0	0	0	0	0	0	0	0
							CHMP2A		0	0	0	0	0	0	0	0	0
							CHPT1		1	0	0	0	0	0	0	0	0
							CHRNB2		0	0	0	0	0	0	0	0	0
							CHST11		0	0	0	0	0	0	0	0	0
							CHST6		0	0	1	0	0	0	0	0	0
							CHSY1		0	0	0	0	0	0	0	0	0
							CIAO1		0	0	0	0	0	0	0	0	0
							CIB2		0	0	0	0	0	0	0	0	0
							CIDEC		0	0	0	0	0	0	0	0	0
							CKAP2		0	0	0	0	0	0	0	0	0
							CKAP4		0	0	0	0	0	0	0	0	0
							CKLF		0	0	0	0	0	0	0	0	0
							CLCF1		0	0	0	1	0	0	0	0	0
							CLCN7		0	0	0	0	0	0	0	0	0
							CLDN19		0	0	0	0	0	0	0	0	0
							CLDN6		1	0	0	0	0	0	0	0	0
							CLDN9		1	0	0	0	0	0	0	0	0
							CLIC1		1	0	0	0	0	0	0	0	0
							CLIC4		0	0	0	0	0	0	0	0	0
							CLIP2		0	0	0	0	0	0	0	0	0
							CLIP4		0	0	0	0	0	0	0	0	0
							CLN8		0	1	0	0	0	0	0	0	0
							CLSTN1		0	0	0	0	0	0	0	0	0
							CLSTN3		0	0	0	0	0	0	0	0	0
							CLTA		0	0	0	0	0	0	0	0	0
							CLTB		0	0	0	0	0	0	0	0	0
							CLU		0	0	0	0	0	0	0	0	0
							CMTM6		0	0	0	0	0	0	0	0	0
							CNBP		1	0	0	0	0	0	0	0	0
							CNOT4		0	0	0	0	0	0	0	0	0
							CNOT6L		0	1	1	0	0	0	0	0	0
							CNTNAP3		0	0	0	0	0	0	0	0	0
							COBRA1		1	0	0	0	0	0	0	0	0
							COCH		0	0	0	0	0	0	0	0	0
							COIL		0	0	0	0	0	0	0	0	0
							COL18A1		1	1	0	0	0	0	0	0	0
							COL1A2		0	0	0	1	0	0	0	0	0
							COL2A1		0	0	0	0	0	0	0	0	0
							COL8A1		0	0	0	0	0	0	0	0	0
							COMMD7		0	0	0	0	0	0	0	0	0
							CORO1B		0	0	0	0	0	0	0	0	0
							CORO2A		1	0	0	0	0	0	0	0	0
							COX5B		0	0	0	0	0	0	0	0	0
							COX6B1		0	0	0	0	0	0	0	0	0
							CPEB4		0	0	0	0	0	0	0	0	0
							CPLX3		1	0	0	0	0	0	0	0	0
							CPS1		0	0	0	0	0	0	0	0	0
							CPSF3L		0	0	0	0	0	0	0	0	0
							CPSF6		0	0	0	0	0	0	0	0	0
							CPT1A		0	0	0	0	0	0	0	0	0
							CRCP		0	0	0	0	0	0	0	0	0
							CREB1		0	0	0	1	0	0	0	1	0
							CREBL2		0	0	0	0	0	0	0	0	0
							CREBZF		0	0	0	0	0	0	0	0	0
							CRIP1		1	0	0	0	0	0	0	0	0
							CRISPLD2	inter+mi	1	1	1	0	0	0	0	0	0
							CRK		0	0	0	1	0	0	0	0	0
							CRKL		1	0	0	1	0	0	0	0	0
							CRLF3		0	0	0	0	0	0	0	0	0
							CSDE1		0	0	0	0	0	0	0	0	0
							CSF1R		0	0	0	1	0	0	0	0	0
							CSK		1	0	0	1	0	0	0	0	0
							CSNK1D		1	0	0	0	0	0	0	0	0
							CTBP1		0	0	0	0	0	0	0	0	0
							CTBP2		0	0	0	0	0	0	0	0	0
							CTCF		0	0	0	0	0	0	0	0	0
							CTDSPL		0	0	0	0	0	0	0	0	0
							CTNNBIP1		0	0	0	0	0	0	0	0	0
							CTSD	intra+mi	0	0	0	0	0	0	0	0	0
							CTSE		0	0	0	0	0	0	0	0	0
							CUL3		0	0	0	0	0	0	0	0	0
							CUL4A		0	0	0	0	0	0	0	0	0
							CUL5		0	0	0	1	0	0	0	0	0
							CUZD1		0	0	0	0	0	0	0	0	0
							CYB561D2		0	0	0	0	0	0	0	0	0
							CYCS		0	0	0	0	0	0	0	1	0
							CYFIP2		1	0	0	0	0	0	0	0	0
							CYP11A1		0	0	0	0	0	0	0	0	0
							CYP19A1		0	0	0	0	0	0	0	0	0
							CYP1A1		1	0	0	0	0	0	0	0	0
							CYP4V2		0	0	0	0	0	0	0	0	0
							CYTH2		0	0	0	0	0	0	0	0	0
							DAB2IP		0	0	0	0	0	0	0	0	0
							DAND5	inter+mi	0	0	0	0	0	0	0	0	0
							DAPK3		0	0	0	0	0	0	0	0	0
							DAXX		0	0	0	0	0	0	0	0	0
							DAZAP1		1	0	0	0	0	0	0	0	0
							DCBLD2		0	0	0	0	1	0	0	0	0
							DCXR	inter+mi	0	0	0	0	0	0	0	0	0
							DDA1		0	0	0	0	0	0	0	0	0
							DDHD1		0	0	0	0	0	0	0	0	0
							DDIT4		0	0	0	0	0	0	0	0	0
							DDOST		0	0	0	0	0	0	0	0	0
							DDX19B		0	0	0	0	0	0	0	0	0
							DDX3X		0	0	0	0	0	0	0	0	0
							DDX41		0	0	0	0	0	0	0	0	0
							DDX50		1	0	0	0	0	0	0	0	0
							DDX54		0	0	0	0	0	0	0	0	0
							DEDD2		0	0	0	0	0	0	0	0	0
							DEGS1		0	0	0	0	0	0	0	0	0
							DEK		0	1	0	0	0	0	0	0	0
							DENND1A		0	0	0	0	0	0	0	0	0
							DENND2C		0	0	0	0	0	0	0	0	0
							DENND3		0	0	0	0	0	0	0	0	0
							DGKD		0	0	0	0	0	0	0	0	0
							DHCR24		0	0	0	0	0	0	0	0	0
							DHODH		0	0	0	0	0	0	0	0	0
							DHRS13		0	0	0	0	0	0	0	0	0
							DIAPH1		0	0	0	0	0	0	0	0	0
							DICER1		1	0	0	0	0	0	0	1	0
							DLG5		1	0	0	0	0	0	0	0	0
							DNAJB13	intra+mi	0	0	0	0	0	0	0	0	0
							DNAJB6		0	0	0	0	0	0	0	0	0
							DNAJB9		0	0	0	0	0	0	0	0	0
							DNAJC10		0	0	0	0	0	0	0	0	0
							DNAJC19		0	0	0	0	0	0	0	0	0
							DNAJC3		0	0	0	0	0	0	0	0	0
							DNAJC5		1	0	0	0	0	0	0	0	0
							DNASE2		0	0	0	0	0	0	0	0	0
							DOCK8		0	0	0	0	0	0	0	0	0
							DOCK9		0	0	0	0	0	0	0	0	0
							DOK3		0	0	0	0	0	0	0	0	0
							DPP7		1	0	0	0	0	0	0	0	0
							DPYSL2		0	0	0	0	0	0	0	0	0
							DRD4		1	0	0	0	0	0	0	0	0
							DSC3		0	0	0	0	0	0	0	0	0
							DST		0	0	0	0	0	0	0	0	0
							DUS1L		0	0	0	0	0	0	0	0	0
							DUSP1	inter+mi	0	0	1	0	0	0	0	0	0
							DUSP10		0	0	0	0	0	0	0	0	0
							DUSP16		0	0	0	0	0	0	0	0	0
							DUSP2	intra+mi	0	0	0	0	0	0	0	0	0
							DUSP5		0	0	0	0	0	0	0	0	0
							DVL1	inter+mi	0	0	0	0	0	0	0	0	0
							DYNC1LI1		0	0	0	0	0	0	0	0	0
							DYNC1LI2		0	0	0	0	0	0	0	0	0
							DYNLT3		0	0	0	0	0	0	0	0	0
							DYRK1A		0	0	0	0	0	0	0	0	0
							DYRK2		0	0	0	0	0	0	0	0	0
							E2F1		0	0	0	0	0	0	0	0	0
							E2F3		0	0	0	0	0	0	0	0	0
							EAF2		0	0	0	0	0	0	0	0	0
							ECE1		0	0	0	0	0	0	0	0	0
							ECSCR		0	0	0	0	0	0	0	0	0
							ECT2		0	0	0	0	0	0	0	0	0
							EDEM1		0	0	0	0	0	0	0	0	0
							EDN2		0	0	0	0	0	0	0	0	0
							EEF1A1		0	0	0	0	0	0	0	1	0
							EEF1A2		1	0	0	0	0	0	0	0	0
							EEF2		0	0	1	0	0	0	0	1	0
							EFNB2		0	0	0	0	0	0	0	0	0
							EFTUD2		0	0	0	0	0	0	0	0	0
							EGLN2		0	0	0	0	0	0	0	0	0
							EGLN3		0	0	0	0	0	0	0	0	0
							EGR1		0	0	0	1	0	0	0	0	0
							EHBP1L1		1	0	0	0	0	0	0	0	0
							EHD2		0	0	0	0	0	0	0	0	0
							EHMT1		1	0	0	0	0	0	0	0	0
							EID1		0	0	0	0	0	0	0	0	0
							EIF2AK3		0	0	0	0	0	0	0	0	0
							EIF2S1		0	0	0	0	0	0	0	1	0
							EIF3M		0	0	0	0	0	0	0	0	0
							EIF4A2		0	0	0	1	0	0	0	0	0
							EIF4EBP1		0	0	0	0	0	0	0	0	0
							EIF4EBP2		0	0	0	0	0	0	0	0	0
							ELANE		0	1	0	0	0	0	0	0	0
							ELK4		0	0	0	0	0	0	0	0	0
							ELL2		0	0	0	0	0	0	0	0	0
							ELMOD1		0	0	0	0	0	0	0	0	0
							ELOVL1		0	0	0	0	0	0	0	0	0
							ELP2		0	0	0	0	0	0	0	0	0
							EMB		0	0	0	0	0	0	0	0	0
							EMG1		0	0	0	0	0	0	0	0	0
							ENC1		0	0	0	0	0	0	0	0	0
							ENO2		1	0	0	0	0	0	0	0	0
							ENOSF1		1	0	0	0	0	0	0	0	0
							ENTPD1		0	0	0	0	0	0	0	0	0
							ENTPD2		1	0	0	0	0	0	0	0	0
							ENTPD3		0	0	0	0	0	0	0	0	0
							EPN1		1	0	0	0	0	0	0	0	0
							EPS15L1		0	0	0	0	0	0	0	0	0
							EPS8		0	0	0	0	0	0	0	0	0
							ERCC1		0	0	0	0	0	0	0	0	0
							ERCC3		0	0	0	0	0	0	0	0	0
							ERCC4		0	0	0	0	0	0	0	0	0
							ERCC6L		0	0	0	0	0	0	0	0	0
							ERCC8		0	0	0	0	0	0	0	0	0
							EREG		0	0	0	0	1	0	0	0	0
							ERGIC2		0	0	0	0	0	0	0	0	0
							ERN1		0	0	0	0	0	0	0	0	0
							ESR2		0	0	0	0	0	0	0	0	0
							ESRRA		0	0	0	0	0	0	0	0	0
							EVL		0	0	0	0	0	0	0	0	0
							EXOC5		0	0	0	0	0	0	0	0	0
							EXOC6		0	0	0	0	0	0	0	0	0
							EXOSC1		0	0	0	0	0	0	0	0	0
							F11R		0	0	0	0	0	0	0	0	0
							F2R		0	0	0	0	0	0	0	0	0
							F2RL1		0	0	0	0	0	0	0	0	0
							F2RL2		0	0	0	0	0	0	0	0	0
							F2RL3		0	0	0	0	0	0	0	0	0
							F3		0	0	0	0	1	0	0	0	0
							FAF2		1	0	0	0	0	0	0	0	0
							FAHD1		0	0	0	0	0	0	0	0	0
							FAIM		0	0	0	0	0	0	0	0	0
							FAM129A		0	0	0	0	0	0	0	0	0
							FAM63A		0	0	0	0	0	0	0	0	0
							FAM82A2		0	0	0	0	0	0	0	0	0
							FANCF		0	0	0	0	0	0	0	0	0
							FANCI		0	0	0	0	0	0	0	0	0
							FANCM		0	0	0	0	0	0	0	0	0
							FAS		0	0	0	0	0	0	1	0	0
							FASLG	intra+DB+mi	0	0	0	1	0	0	0	0	0
							FASTK		1	0	0	0	0	0	0	0	0
							FASTKD5		1	0	0	0	0	0	0	0	0
							FAT3		0	0	0	0	0	0	0	0	0
							FBXO21		0	1	0	0	0	0	0	0	0
							FBXO25		0	0	0	0	0	0	0	0	0
							FBXO5		0	0	0	0	0	0	0	0	0
							FBXO9		0	0	0	0	0	0	0	0	0
							FBXW11		1	0	0	1	0	0	0	0	0
							FBXW2		0	0	0	0	0	0	0	0	0
							FCHO2		0	0	0	0	0	0	0	0	0
							FCHSD1		1	0	0	0	0	0	0	0	0
							FCRLB		0	0	0	0	0	0	0	0	0
							FEM1B		0	0	0	0	0	0	0	0	0
							FEM1C		0	0	0	0	0	0	0	0	0
							FEN1		0	0	0	0	0	0	0	0	0
							FERMT1		0	0	0	0	0	0	0	0	0
							FFAR2		1	0	0	0	1	0	0	0	0
							FGD4		0	0	0	0	0	0	0	0	0
							FGF2		0	0	0	1	0	0	0	1	0
							FGF23		0	0	0	0	0	0	0	0	0
							FGF7		0	0	0	0	0	0	0	0	0
							FKBP14		0	0	0	0	0	0	0	0	0
							FKBP15		0	0	0	0	0	0	0	0	0
							FKBP1A		0	0	0	0	0	0	0	0	0
							FKBP5		0	0	0	0	0	0	0	0	0
							FKBP8		0	0	0	0	0	0	0	0	0
							FKBP9		0	0	0	0	0	0	0	0	0
							FLVCR1		0	0	0	0	0	0	0	0	0
							FNBP1		0	0	0	0	0	0	0	0	0
							FNBP1L		0	0	0	0	0	0	0	0	0
							FNDC3B		0	0	0	0	0	0	0	0	0
							FOS		0	0	0	1	0	0	0	1	0
							FOSL1		1	0	0	0	0	0	0	0	0
							FOSL2		0	0	0	0	0	0	0	0	0
							FOXA1		0	0	0	0	0	0	0	0	0
							FOXC1		0	0	0	0	0	0	0	0	0
							FOXK2		1	0	0	0	0	0	0	0	0
							FOXN2		0	0	0	0	0	0	0	0	0
							FOXO1		0	0	0	1	0	0	0	1	0
							FOXQ1		0	0	0	0	0	0	0	0	0
							FRS2		0	0	0	0	0	0	0	0	0
							FUS		1	0	0	0	0	0	0	0	0
							FUT1	inter+mi	0	0	0	0	0	0	0	0	0
							FUT3		0	0	0	0	0	0	0	0	0
							FUT7		1	0	0	0	0	0	0	0	0
							FXR1		0	0	0	0	0	0	0	0	0
							FXYD5		0	0	0	0	0	0	0	0	0
							FZD1		0	0	0	0	0	0	0	0	0
							FZD4		0	0	0	0	0	0	0	0	0
							G2E3		0	0	0	0	0	0	0	0	0
							G3BP2		0	0	0	0	0	0	0	0	0
							GAB2		0	0	0	1	0	0	0	0	0
							GABPB2	inter+mi	1	0	0	0	0	0	0	0	0
							GALNT1		0	0	0	0	0	0	0	0	0
							GALNT2		1	1	1	0	0	0	0	0	0
							GATA6		1	0	0	0	0	0	0	0	0
							GATAD1		0	0	0	0	0	0	0	0	0
							GATM		0	0	0	0	0	0	0	0	0
							GCC2		0	0	0	0	0	0	0	0	0
							GCGR		0	0	0	0	0	0	0	0	0
							GCH1		0	0	0	0	1	0	1	0	0
							GCNT3		0	0	0	0	0	0	0	0	0
							GDF11		0	0	0	0	0	0	0	0	0
							GGCX		0	0	0	0	0	0	0	0	0
							GLO1		0	0	0	0	0	0	0	0	0
							GML		0	0	0	0	0	0	0	0	0
							GNA12		0	0	0	0	0	0	0	0	0
							GNAI2		0	0	0	0	0	0	0	0	0
							GNAQ		1	0	0	0	0	0	0	0	0
							GNB1		1	0	0	0	0	0	0	0	0
							GNPTAB		1	0	0	0	0	0	0	0	0
							GNRH1		0	0	0	0	0	0	0	0	0
							GNS		0	0	0	0	0	0	0	0	0
							GOLGA8A		0	0	0	0	0	0	0	0	0
							GP2		0	1	0	0	0	0	0	0	0
							GPC4		0	0	0	0	0	0	0	0	0
							GPR183		0	0	0	0	1	0	0	0	0
							GPR35		0	0	0	0	0	0	0	0	0
							GPR89A		0	0	0	0	0	0	0	0	0
							GPSM2		0	0	0	0	0	0	0	0	0
							GRAMD4		1	0	0	0	0	0	0	0	0
							GRHPR		1	0	0	0	0	0	0	0	0
							GRIN1		1	0	0	0	0	0	0	0	0
							GRIN2A		0	0	0	0	0	0	0	0	0
							GRINA		1	0	0	0	0	0	0	0	0
							GRSF1		0	0	0	0	0	0	0	0	0
							GSK3A		0	0	0	0	0	0	0	0	0
							GTF2A1		0	0	0	0	0	0	0	0	0
							GTPBP10		0	0	0	0	0	0	0	0	0
							GTPBP2		0	0	0	0	0	0	0	0	0
							GULP1		0	0	0	0	0	0	0	0	0
							H2AFY		0	0	0	0	0	0	0	0	0
							H3F3B		0	0	0	0	0	0	0	0	0
							HADH		0	0	0	0	0	0	0	0	0
							HAPLN2		0	0	0	0	0	0	0	0	0
							HAS2		0	0	0	0	1	0	0	0	0
							HAS3		0	0	1	0	0	0	0	0	0
							HAT1		0	0	0	0	0	0	0	0	0
							HAX1		0	0	0	0	0	0	0	0	0
							HBEGF		1	0	0	0	1	0	0	0	0
							HBP1		0	0	0	0	0	0	0	0	0
							HCFC1R1		1	0	0	0	0	0	0	0	0
							HCG25		0	0	0	0	0	0	0	0	0
							HDAC3		1	0	0	0	0	0	0	0	0
							HEATR1		0	0	0	0	0	0	0	0	0
							HECTD1		0	0	0	0	0	0	0	0	0
							HIBADH		0	1	0	0	0	0	0	0	0
							HIGD1A		0	0	0	0	0	0	0	0	0
							HIGD2A		0	0	0	0	0	0	0	0	0
							HIP1		1	1	0	0	0	0	0	0	0
							HIPK3		0	0	0	0	0	0	0	0	0
							HIST1H2BD		0	0	0	0	0	0	0	0	0
							HIVEP1		0	0	1	0	0	0	0	0	0
							HIVEP3		1	1	0	0	0	0	0	0	0
							HLA-E		0	0	0	1	0	0	0	0	0
							HMG20B		0	0	0	0	0	0	0	0	0
							HMGA1		0	0	0	0	0	0	0	0	0
							HMGB1		1	0	0	1	0	0	0	0	0
							HMGB2		0	0	0	0	0	0	0	0	0
							HMGB3		0	0	0	0	0	0	0	0	0
							HMGN1		0	0	0	0	0	0	0	0	0
							HMHA1		1	0	0	0	0	0	0	0	0
							HMMR		0	0	0	0	0	0	0	0	0
							HOOK2		0	0	0	0	0	0	0	0	0
							HOXA13		0	0	0	0	0	0	0	0	0
							HOXD10		0	0	0	0	0	0	0	0	0
							HRH1		0	0	0	0	1	0	0	0	0
							HSBP1L1		0	0	0	0	0	0	0	0	0
							HSF2		0	0	0	0	0	0	0	0	0
							HSP90B1	inter+mi	0	0	0	1	0	0	0	0	0
							HSPA14		0	0	0	0	0	0	0	0	0
							HSPA1B		1	0	0	0	0	0	0	0	0
							HSPA8		0	0	0	1	0	0	0	1	0
							HSPA9		0	0	0	1	0	0	0	1	0
							HYPK		0	0	0	0	0	0	0	0	0
							IBTK		0	0	0	0	0	0	0	0	0
							ICA1L		0	0	0	0	0	0	0	0	0
							ICAM1		0	0	0	1	1	0	1	1	0
							ICAM3		0	0	0	0	0	0	0	0	0
							ICK		0	0	0	0	0	0	0	0	0
							ICOSLG		0	0	0	0	1	0	0	0	0
							ID1		0	0	0	0	0	0	0	0	0
							ID2		0	0	0	0	0	0	0	0	0
							IDI1		0	0	0	0	0	0	0	0	0
							IFITM1		0	0	0	1	1	1	0	0	0
							IFRD1		0	0	0	0	0	0	0	0	0
							IFRD2		0	0	0	0	0	0	0	0	0
							IFT140		0	0	0	0	0	0	0	0	0
							IGDCC4		0	0	0	0	0	0	0	0	0
							IGF1		0	0	0	0	0	0	0	1	0
							IGF1R		0	0	0	0	0	0	0	1	0
							IGF2		0	0	0	0	0	0	0	0	0
							IGF2BP1		0	0	0	0	0	0	0	0	0
							IGF2R		1	0	0	0	0	0	0	0	0
							IGKV2-30		0	0	0	0	0	0	0	0	0
							IGSF9		0	0	0	0	0	0	0	0	0
							IKZF2		0	0	0	0	0	0	0	0	0
							IKZF3		1	0	1	0	0	0	0	0	0
							IKZF4		0	0	1	0	0	0	0	0	0
							IL10		0	0	0	1	1	0	0	1	0
							IL10RB		0	0	0	1	0	0	0	0	0
							IL15		0	0	0	1	1	1	1	0	0
							IL17RB		0	0	0	1	0	0	0	0	0
							IL1R1		0	0	0	1	1	0	0	0	0
							IL1RAP		0	0	0	1	0	0	0	0	0
							IL32		1	0	0	1	0	0	0	0	0
							IL6R		0	0	0	1	0	0	0	0	0
							IL6ST		0	0	0	1	0	0	0	0	0
							IL7		0	0	0	1	0	1	1	0	0
							IL7R		0	0	0	1	1	0	0	0	0
							IL9RP3		1	0	0	0	0	0	0	0	0
							ILK		0	0	0	0	0	0	0	0	0
							IMPDH2		0	0	0	0	0	0	0	0	0
							INCENP		0	0	0	0	0	0	0	0	0
							INHBA		0	0	0	0	1	0	0	0	0
							INSIG1	inter+mi	0	0	0	0	0	0	0	0	0
							IPO9		0	0	0	0	0	0	0	0	0
							IQGAP1		0	0	0	0	0	0	0	0	0
							IRAK1		0	0	0	1	0	0	0	0	0
							IRAK4		0	0	0	1	0	0	0	0	0
							IRF2BP2		0	0	0	0	0	0	0	0	0
							IRF7		1	0	0	1	1	1	1	0	0
							IRF8		0	0	0	1	0	0	1	0	0
							IRGQ		0	0	0	0	0	0	0	0	0
							ISG20L2		0	0	0	0	0	0	0	0	0
							ITGA2		1	0	0	0	0	0	0	0	0
							ITGA3		0	0	0	0	0	0	0	0	0
							ITGA6		0	0	0	0	0	0	0	0	0
							ITGAV		0	0	0	0	0	0	0	0	0
							ITGB1		0	0	0	1	0	0	0	1	0
							ITGB2		0	0	0	1	0	0	0	0	0
							ITGB3		0	0	0	0	1	0	0	1	0
							ITGB8		0	0	0	0	1	0	0	0	0
							ITK		1	0	0	0	0	0	0	0	0
							ITM2B		0	0	0	0	0	0	0	0	0
							ITPR1		0	0	0	0	0	0	0	0	0
							ITPR3		0	0	0	0	0	0	0	0	0
							IZUMO1		0	0	0	0	0	0	0	0	0
							JAG1		0	0	0	0	0	0	0	0	0
							JRK		0	0	0	0	0	0	0	0	0
							KARS		1	0	0	0	0	0	0	0	0
							KAT2B		0	0	0	0	0	0	0	1	0
							KCNJ8		0	0	0	0	0	0	0	0	0
							KCNQ1		1	1	0	0	0	0	0	0	0
							KIAA0141		1	0	0	0	0	0	0	0	0
							KIAA1191	inter+mi	0	0	0	0	0	0	0	0	0
							KIF1B		0	0	0	0	1	0	0	0	0
							KLF1		0	0	0	0	0	0	0	0	0
							KLF10		0	0	0	0	0	0	0	0	0
							KLF3		1	0	0	0	0	0	0	0	0
							KLF6		0	0	0	0	1	0	0	0	0
							KLHL21		0	0	0	0	0	0	0	0	0
							KLRD1		0	0	0	0	0	0	0	0	0
							KPNA2		0	0	0	1	0	0	0	0	0
							KPNA6		1	0	0	0	0	0	0	0	0
							KRT10		0	0	0	0	0	0	0	0	0
							LAMB2		1	0	0	0	0	0	0	0	0
							LAMP2		0	0	0	0	0	0	0	0	0
							LAPTM4A		0	0	0	0	0	0	0	0	0
							LARS		1	1	0	0	0	0	0	0	0
							LAX1		0	0	0	0	0	0	0	0	0
							LCN2		0	0	0	1	0	0	0	0	0
							LCP2		0	0	0	0	1	0	1	0	0
							LDLR		0	0	0	0	1	0	0	0	0
							LEAP2		1	1	0	0	0	0	0	0	0
							LEPROTL1		0	0	0	0	0	0	0	0	0
							LFNG		0	0	0	0	0	0	0	0	0
							LGMN		1	0	0	0	0	0	0	0	0
							LIAS		0	0	0	0	0	0	0	0	0
							LILRA2		0	0	0	0	0	0	0	0	0
							LIMK1		0	0	0	0	0	0	0	0	0
							LIMS1		0	0	0	0	0	0	0	0	0
							LIN7C		0	0	0	0	0	0	0	0	0
							LIN9		0	0	0	0	0	0	0	0	0
							LINC00598		0	0	0	0	0	0	0	0	0
							LIPA		0	0	0	0	0	0	0	0	0
							LMAN1		0	0	0	0	0	0	0	0	0
							LMLN		0	0	0	0	0	0	0	0	0
							LMNB1		0	0	0	1	0	0	0	0	0
							LOC645166		1	0	0	0	0	0	0	0	0
							LOXL2		0	0	0	0	0	0	0	0	0
							LPIN1		0	0	0	0	0	0	0	0	0
							LRIG1		0	0	0	0	0	0	0	0	0
							LRP12		0	0	0	0	0	0	0	0	0
							LRP3		0	0	0	0	0	0	0	0	0
							LRP8		0	0	0	0	0	0	0	0	0
							LRPAP1		0	0	0	0	0	0	0	0	0
							LRRFIP1		0	0	0	0	0	0	0	0	0
							LRRFIP2		0	0	0	0	0	0	0	0	0
							LRRN3		0	0	0	0	0	0	0	0	0
							LSAMP		0	0	0	0	0	0	0	0	0
							LSM14B		0	0	0	0	0	0	0	0	0
							LSP1		0	0	0	0	0	0	0	0	0
							LTK		0	0	0	0	0	0	0	0	0
							LY6D		0	0	0	0	0	0	0	0	0
							LY6G5B		0	0	0	0	0	0	0	0	0
							LY6K		0	0	0	0	0	0	0	0	0
							LYN		0	0	0	1	1	0	0	1	0
							LYVE1		0	0	0	0	0	0	0	0	0
							M6PR		0	0	0	0	0	0	0	0	0
							MACF1		0	0	0	0	0	0	0	0	0
							MAD2L1		0	0	0	0	0	0	0	0	0
							MAD2L1BP		0	0	0	0	0	0	0	0	0
							MAF		0	0	0	0	0	0	0	0	0
							MAN2A1		0	0	0	0	0	0	0	0	0
							MAP1S		1	1	0	0	0	0	0	0	0
							MAP2K4		0	0	0	1	0	0	0	0	0
							MAP3K1		0	0	0	0	0	0	0	0	0
							MAP3K12		0	0	0	0	0	0	0	0	0
							MAP3K2		0	0	0	0	0	0	0	0	0
							MAP3K9		0	0	0	0	0	0	0	0	0
							MAP4		0	0	0	0	0	0	0	0	0
							MAPK1		1	0	0	1	0	0	0	1	0
							MAPK11		1	0	0	1	0	0	0	0	0
							MAPK12		1	0	0	0	0	0	0	0	0
							MAPK14		0	0	0	1	0	0	0	1	0
							MAPK9		0	0	0	1	0	0	0	0	0
							MAPKAPK5		0	0	0	0	0	0	0	0	0
							MAST1		0	0	0	0	0	0	0	0	0
							MAVS		0	0	0	0	0	0	0	0	0
							MB21D1		0	0	0	0	0	0	0	0	0
							MBTPS1		0	0	0	0	0	0	0	0	0
							MCAM	intra+mi	1	0	0	0	0	0	0	0	0
							MCC		0	0	0	0	0	0	0	0	0
							MCL1		0	0	0	1	0	0	0	1	0
							MDM2		0	0	1	0	0	0	0	1	0
							MDM4		1	0	0	0	0	0	0	0	0
							MED28		1	0	0	0	0	0	0	0	0
							MEF2D		1	0	0	0	0	0	0	0	0
							MEN1		0	0	0	0	0	0	0	0	0
							METTL7A		0	0	0	0	0	0	0	0	0
							METTL9		0	0	0	0	0	0	0	0	0
							MFF		0	0	0	0	0	0	0	0	0
							MFN1		0	0	0	0	0	0	0	0	0
							MFN2		0	0	0	0	0	0	0	0	0
							MFSD10		0	0	0	0	0	0	0	0	0
							MIA3		0	0	0	0	0	0	0	0	0
							MIB1		0	0	0	0	0	0	0	0	0
							MID1		0	0	0	1	0	0	0	0	0
							MIER3		0	0	0	0	0	0	0	0	0
							MINK1		0	0	0	0	0	0	0	0	0
							MIR141		1	0	0	0	0	0	0	0	0
							MIR200C		1	0	0	0	0	0	0	0	0
							MKI67		0	0	0	0	0	0	0	0	0
							MKLN1		1	0	0	0	0	0	0	0	0
							MKNK2		0	0	0	0	0	0	0	0	0
							MLF2		1	0	0	0	0	0	0	0	0
							MLH1		0	0	0	0	0	0	0	0	0
							MLLT1		0	0	0	0	0	0	0	0	0
							MLLT10		0	1	0	0	0	0	0	0	0
							MLLT11		0	1	0	0	0	0	0	0	0
							MOAP1		0	0	0	0	0	0	0	0	0
							MPP1		0	0	0	0	0	0	0	0	0
							MPPE1		0	0	0	0	0	0	0	0	0
							MPZL1		0	0	0	0	0	0	0	0	0
							MRPL19		0	1	0	0	0	0	0	0	0
							MRPL20		0	0	0	0	0	0	0	0	0
							MRPL23		0	0	0	0	0	0	0	0	0
							MRPL41		1	0	0	0	0	0	0	0	0
							MRPL43		0	0	0	0	0	0	0	0	0
							MRPS10		0	0	0	0	0	0	0	0	0
							MRPS23		0	0	0	0	0	0	0	0	0
							MRVI1		0	0	0	0	0	0	0	0	0
							MSH3		0	0	0	0	0	0	0	0	0
							MSH6		0	0	0	0	0	0	0	0	0
							MSN		0	0	0	1	0	0	0	0	0
							MST1R		0	0	1	0	0	0	0	0	0
							MTA1		1	0	0	0	0	0	0	0	0
							MTDH		0	0	0	0	0	0	0	0	0
							MTF1		0	0	0	0	0	0	0	0	0
							MTMR12		0	0	0	0	0	0	0	0	0
							MTMR3		1	1	0	0	0	0	0	0	0
							MTSS1		0	0	0	0	0	0	0	0	0
							MUM1		0	0	0	0	0	0	0	0	0
							MXI1		0	0	0	0	0	0	0	0	0
							MYADM		0	0	0	0	0	0	0	0	0
							MYB		0	0	0	0	0	0	0	0	0
							MYBPC3		0	0	0	0	0	0	0	0	0
							MYH9		0	0	0	0	0	0	0	0	0
							MYO5A		1	0	0	0	0	0	0	0	0
							MYOD1		0	0	0	0	0	0	0	0	0
							MZB1		0	0	0	0	0	0	0	0	0
							N4BP1		0	0	0	0	0	0	0	0	0
							NAB1		0	0	0	0	0	0	0	0	0
							NACA		0	0	0	0	0	0	0	0	0
							NACC1		0	0	0	0	0	0	0	0	0
							NAMPT		0	0	0	0	1	0	1	0	0
							NARF		1	0	0	0	0	0	0	0	0
							NARS		0	0	0	0	0	0	0	0	0
							NBN		0	0	0	0	0	0	0	0	0
							NCBP2		0	0	0	0	0	0	0	0	0
							NCKIPSD		0	0	0	0	0	0	0	0	0
							NCOR2		0	0	0	0	0	0	0	0	0
							NCSTN		0	0	0	0	0	0	0	0	0
							NDST1		1	0	0	0	0	0	0	0	0
							NDUFA11		0	0	0	0	0	0	0	0	0
							NDUFA7		0	0	0	0	0	0	0	0	0
							NDUFS7		0	0	0	0	0	0	0	0	0
							NECAP1		0	0	0	0	0	0	0	0	0
							NEFL		0	0	0	0	0	0	0	0	0
							NEIL3		0	0	0	0	0	0	0	0	0
							NEO1		0	0	0	0	0	0	0	0	0
							NEUROD2		1	0	0	0	0	0	0	0	0
							NF2		0	0	0	0	0	0	0	0	0
							NFAM1		0	0	0	0	0	0	0	0	0
							NFAT5		0	0	0	0	0	0	0	0	0
							NFATC2IP		0	0	0	0	0	0	0	0	0
							NFE2L1		0	0	0	0	0	0	0	0	0
							NFIB		0	0	0	0	0	0	0	0	0
							NFIC	intra+mi	0	0	0	0	0	0	0	0	0
							NFKB1		0	0	0	1	1	0	1	1	0
							NFKBIB		0	0	0	1	0	0	0	0	0
							NFKBIZ		0	0	0	0	0	0	0	0	0
							NFYA		1	1	0	0	0	0	0	0	0
							NGFR		0	0	0	0	0	0	0	0	0
							NID1		0	0	0	0	0	0	0	0	0
							NIN		0	0	0	0	0	0	0	0	0
							NISCH		0	0	0	0	0	0	0	0	0
							NKAP		0	0	0	0	0	0	0	0	0
							NKIRAS1		0	0	0	1	0	0	0	0	0
							NKRF		0	0	0	0	0	0	0	0	0
							NLK		0	0	0	0	0	0	0	0	0
							NLRP9	intra+mi	1	0	0	0	0	0	0	0	0
							NME6		0	0	0	0	0	0	0	0	0
							NOD2		0	0	0	1	1	0	0	0	0
							NOS2		1	0	0	1	0	0	0	0	0
							NOTCH2		0	0	0	0	0	0	0	0	0
							NOXA1		1	0	0	0	0	0	0	0	0
							NOXO1		1	0	0	0	0	0	0	0	0
							NPHP3		0	0	0	0	0	0	0	0	0
							NPNT		0	0	0	0	0	0	0	0	0
							NPTN		0	0	0	0	0	0	0	0	0
							NR1H4		0	0	0	0	0	0	0	0	0
							NR3C1		0	0	0	0	0	0	0	1	0
							NRAS		0	1	0	1	0	0	0	1	0
							NREP		0	0	0	0	0	0	0	0	0
							NRG4		0	0	0	0	0	0	0	0	0
							NRTN		0	0	0	0	0	0	0	0	0
							NRXN2		0	0	0	0	0	0	0	0	0
							NRXN3		0	1	0	0	0	0	0	0	0
							NSF		0	0	0	0	0	0	0	0	0
							NTRK1		0	0	0	0	0	0	0	0	0
							NUCB2		1	0	0	0	0	0	0	0	0
							NUCKS1		0	0	0	0	0	0	0	0	0
							NUDCD2		0	0	0	0	0	0	0	0	0
							NUDT4		0	0	0	0	0	0	0	0	0
							NUDT7		0	0	0	0	0	0	0	0	0
							NUP43		0	0	0	1	0	0	0	0	0
							NUP98		0	0	0	1	0	0	0	0	0
							NUS1		0	0	0	0	0	0	0	0	0
							OCIAD1		0	0	0	0	0	0	0	0	0
							OLAH		0	0	0	0	0	0	0	0	0
							OLR1		0	0	0	0	1	0	0	0	0
							OMD		0	0	0	0	0	0	0	0	0
							OPA1		0	0	0	0	0	0	0	0	0
							OPA3		0	0	0	0	0	0	0	0	0
							ORMDL3		0	0	0	0	0	0	0	0	0
							OSMR		0	0	0	1	1	0	0	0	0
							OTUB2		1	1	0	0	0	0	0	0	0
							OTUD1		0	0	0	0	0	0	0	0	0
							OTUD4		0	0	0	0	0	0	0	0	0
							OTUD5		0	0	0	0	0	0	0	0	0
							OXT		1	1	0	0	0	0	0	0	0
							P2RX7		1	0	0	0	1	0	0	0	0
							P2RY14		0	0	0	0	0	0	1	0	0
							PABPC4		0	0	0	0	0	0	0	0	0
							PACS2		0	0	0	0	0	0	0	0	0
							PADI4		0	0	0	0	0	0	0	0	0
							PAFAH1B1		0	0	0	0	0	0	0	0	0
							PAFAH1B2		0	0	0	0	0	0	0	0	0
							PAFAH2		0	0	0	0	0	0	0	0	0
							PAIP1		0	0	0	0	0	0	0	0	0
							PANX1		0	0	0	0	0	0	0	0	0
							PARD3		0	0	0	0	0	0	0	0	0
							PARP1		0	0	0	0	0	0	0	1	0
							PARP12		0	0	0	0	0	1	1	0	0
							PARP16		0	0	0	0	0	0	0	0	0
							PARP6		0	0	0	0	0	0	0	0	0
							PASK		0	0	0	0	0	0	0	0	0
							PAWR		0	0	0	0	0	0	0	0	0
							PBXIP1		0	0	0	0	0	0	0	0	0
							PCBD2		0	0	0	0	0	0	0	0	0
							PCBP2		0	0	0	0	0	0	0	0	0
							PCDH12		1	0	0	0	0	0	0	0	0
							PCDH7		0	0	0	0	1	0	0	0	0
							PCSK9		0	0	0	0	0	0	0	0	0
							PDE12		0	0	0	1	0	0	0	0	0
							PDE3A		0	0	0	0	0	0	0	0	0
							PDGFB		0	0	0	0	0	0	0	0	0
							PDGFRB		0	0	0	0	0	0	0	0	0
							PDHB		0	0	0	0	0	0	0	0	0
							PDK3		0	0	0	0	0	0	0	0	0
							PDLIM7		1	0	0	0	0	0	0	0	0
							PDPK1		0	0	0	0	0	0	0	0	0
							PEA15		0	0	0	0	0	0	0	0	0
							PEAR1		0	1	1	0	0	0	0	0	0
							PEG10		0	0	0	0	0	0	0	0	0
							PELI1		0	0	0	1	0	0	1	0	0
							PERP		0	0	0	0	0	0	0	0	0
							PFKFB2		0	0	0	0	0	0	0	0	0
							PFKL		0	0	0	0	0	0	0	0	0
							PFKP		0	0	0	0	0	0	1	0	0
							PGAM1		0	0	0	0	0	0	0	0	0
							PGD		0	0	0	0	0	0	0	0	0
							PHB2	intra+mi	1	0	0	0	0	0	0	0	0
							PHC2		0	0	0	0	0	0	0	0	0
							PHF10		1	0	0	0	0	0	0	0	0
							PHKA1		0	0	0	0	0	0	0	0	0
							PHLDA2		0	0	0	0	0	0	0	0	0
							PHLDA3		0	0	0	0	0	0	0	0	0
							PHLPP2		0	0	0	0	0	0	0	0	0
							PHTF1		0	0	0	0	0	0	0	0	0
							PHTF2		0	0	0	0	0	0	0	0	0
							PIAS4		0	0	0	0	0	0	0	0	0
							PIK3AP1		0	0	0	0	0	0	0	0	0
							PIK3CD		0	0	0	1	0	0	0	0	0
							PIK3R4		0	0	0	0	0	0	0	0	0
							PILRA		0	0	0	0	0	0	0	0	0
							PILRB	inter+mi	0	0	0	0	0	0	0	0	0
							PIM1		0	0	0	1	0	0	1	0	0
							PIN1		0	0	0	1	0	0	0	0	0
							PITPNA		0	0	0	1	0	0	0	0	0
							PITPNC1		0	0	0	0	0	0	0	0	0
							PIWIL2		0	0	0	0	0	0	0	0	0
							PKD1		0	0	0	0	0	0	0	0	0
							PKNOX1		0	0	0	0	0	0	0	0	0
							PKP3		0	0	0	0	0	0	0	0	0
							PKP4		0	0	0	0	0	0	0	0	0
							PLA2G5		0	1	0	0	0	0	0	0	0
							PLA2G6		0	0	0	0	0	0	0	0	0
							PLAGL2		0	0	0	0	0	0	0	0	0
							PLAU		0	0	0	0	0	0	0	0	0
							PLCE1		0	0	1	0	0	0	0	0	0
							PLCG2		0	1	0	0	0	0	0	0	0
							PLD3		1	0	0	0	0	0	0	0	0
							PLEKHA1		0	0	0	0	0	0	0	0	0
							PLEKHG2		0	0	0	0	0	0	0	0	0
							PLK4		0	0	0	0	0	0	0	0	0
							PLOD1		0	0	0	0	0	0	0	0	0
							PLRG1		0	0	0	0	0	0	0	0	0
							PLXNA3		0	0	0	0	0	0	0	0	0
							PLXNA4		1	0	0	0	0	0	0	0	0
							PLXNB2		1	0	0	0	0	0	0	0	0
							PMAIP1		0	0	0	0	0	0	0	0	0
							PNP		1	0	0	0	0	0	1	0	0
							PNRC1		0	0	0	0	0	0	0	0	0
							POC1A		0	0	0	0	0	0	0	0	0
							PODXL		1	0	0	0	0	0	0	0	0
							POLD3	inter+mi	0	0	0	0	0	0	0	0	0
							POLD4		1	0	0	0	0	0	0	0	0
							POLR1B		0	0	0	0	0	0	0	0	0
							POLR2E	inter+mi	1	0	0	0	0	0	0	0	0
							POLR3A		1	1	0	0	0	0	0	0	0
							POLR3F		0	0	0	0	0	0	0	0	0
							POLR3K		1	0	0	0	0	0	0	0	0
							POU2F1		0	0	0	1	0	0	0	0	0
							POU2F2		1	0	0	0	0	0	0	0	0
							PPARG		0	1	0	0	0	0	0	1	0
							PPARGC1A		0	0	0	0	0	0	0	1	0
							PPCS		0	0	0	0	0	0	0	0	0
							PPFIBP1		0	0	0	0	0	0	0	0	0
							PPIC		0	0	0	0	0	0	0	0	0
							PPIF		0	0	0	0	0	0	0	0	0
							PPIL2		0	0	0	0	0	0	0	0	0
							PPM1A		0	0	0	0	0	0	0	0	0
							PPP1CA	intra+mi	0	0	0	0	0	0	0	0	0
							PPP1CB		0	0	0	0	0	0	0	0	0
							PPP2R1A		0	0	0	1	0	0	0	0	0
							PPP2R4		0	0	0	0	0	0	0	0	0
							PPT1		0	0	0	0	0	0	0	0	0
							PPTC7		0	0	0	0	0	0	0	0	0
							PRDM4		0	0	0	0	0	0	0	0	0
							PRDX2		0	0	0	0	0	0	0	0	0
							PRDX5		0	0	0	0	0	0	0	0	0
							PRKAA2		0	0	0	0	0	0	0	0	0
							PRKACB		0	0	0	0	0	0	0	0	0
							PRKAR1A		0	0	1	0	0	0	0	0	0
							PRKCA		0	0	0	0	0	0	0	1	0
							PRKCB		0	0	0	0	0	0	0	0	0
							PRKD3		0	0	0	0	0	0	0	0	0
							PRNP		0	0	0	0	0	0	0	0	0
							PRPF19		0	0	0	0	0	0	0	0	0
							PRPF4B		0	0	0	0	0	0	0	0	0
							PRPF8		0	0	0	0	0	0	0	0	0
							PRPS1		0	0	0	0	0	0	0	0	0
							PRPS2		0	0	0	0	0	0	0	0	0
							PRRC2A		1	0	0	0	0	0	0	0	0
							PRRC2B		0	0	0	0	0	0	0	0	0
							PRTN3		0	1	0	1	0	0	0	0	0
							PSD4		0	0	0	0	0	0	0	0	0
							PSMA5		0	0	0	1	0	0	0	0	0
							PSMB5		1	0	0	1	0	0	0	0	0
							PSMC3		0	0	0	1	0	0	0	0	0
							PSMD5		0	0	0	1	0	0	0	0	0
							PSMD6		0	0	0	1	0	0	0	0	0
							PSMD7		0	0	0	1	0	0	0	0	0
							PSME3		0	0	0	1	0	0	0	0	0
							PTAFR		0	0	0	1	1	0	0	0	0
							PTAR1		0	0	0	0	0	0	0	0	0
							PTBP1		1	0	0	0	0	0	0	0	0
							PTGER4		0	0	0	0	1	0	0	0	0
							PTGES2		0	0	0	0	0	0	0	0	0
							PTGES3		0	0	0	0	0	0	0	0	0
							PTGFRN		0	0	0	0	0	0	0	0	0
							PTGIS		0	0	0	0	0	0	0	0	0
							PTGR2		0	0	0	0	0	0	0	0	0
							PTK7		0	0	0	0	0	0	0	0	0
							PTP4A1		0	0	0	0	0	0	0	0	0
							PTPN4		0	0	0	1	0	0	0	0	0
							PTPN6		1	0	0	1	0	0	1	0	0
							PTPRCAP		0	0	0	0	0	0	0	0	0
							PTPRE		0	0	0	0	1	0	0	0	0
							PTPRF		0	0	0	0	0	0	0	0	0
							PTPRJ		0	0	0	1	0	0	0	0	0
							PTTG1IP		0	0	0	0	0	0	0	0	0
							PURA		0	0	0	0	0	0	0	0	0
							PURB		0	0	0	0	0	0	0	0	0
							PVR		0	0	0	0	1	0	0	0	0
							PXDN		0	0	0	0	0	0	0	0	0
							PXK		0	0	0	0	0	0	0	0	0
							QARS		1	0	0	0	0	0	0	0	0
							QKI		0	0	0	0	0	0	0	0	0
							QRICH1		1	0	0	0	0	0	0	0	0
							QSER1		0	0	0	0	0	0	0	0	0
							RAB11FIP1		0	0	0	0	0	0	0	0	0
							RAB11FIP2		0	0	0	0	0	0	0	0	0
							RAB11FIP4		0	1	0	0	0	0	0	0	0
							RAB13		0	0	0	0	0	0	0	0	0
							RAB1A		0	0	0	0	0	0	0	0	0
							RAB22A		0	0	0	0	0	0	0	0	0
							RAB27A		0	0	0	0	0	0	0	0	0
							RAB27B		0	0	0	0	0	0	0	0	0
							RAB32		0	0	0	0	0	0	0	0	0
							RAB3B		0	0	0	0	0	0	0	0	0
							RAB3D		1	0	0	0	0	0	0	0	0
							RAB5B		0	0	0	0	0	0	0	0	0
							RAB8B		0	0	0	0	0	0	0	0	0
							RABGAP1		0	0	0	0	0	0	0	0	0
							RABGAP1L		0	0	0	0	0	0	0	0	0
							RAC2		1	0	0	0	0	0	0	1	0
							RAC3		0	0	0	0	0	0	0	0	0
							RACGAP1		0	0	0	0	0	0	0	0	0
							RAD21		0	0	0	0	0	0	0	0	0
							RAD23A		0	0	0	0	0	0	0	0	0
							RAD23B		0	0	0	0	0	0	0	0	0
							RAD9A		1	0	0	0	0	0	0	0	0
							RADIL		0	0	0	0	0	0	0	0	0
							RAET1E	DB+mi	0	0	0	0	0	0	0	0	0
							RAN		0	0	0	0	0	0	0	0	0
							RANBP6		0	0	0	0	0	0	0	0	0
							RAPGEF1		1	0	0	1	0	0	0	0	0
							RAPGEF2		0	0	0	0	0	0	0	0	0
							RARB		0	0	0	0	0	0	0	0	0
							RASA3		1	0	0	0	0	0	0	0	0
							RASSF1		0	0	0	0	0	0	0	0	0
							RB1		0	0	0	0	0	0	0	0	0
							RBCK1		1	1	0	0	0	0	1	0	0
							RBP7		0	0	0	0	0	0	0	0	0
							RBPJ		0	0	0	0	0	0	0	0	0
							RCAN1		0	0	0	0	0	0	0	0	0
							RDH10		0	0	0	0	0	0	0	0	0
							RDH11		0	0	0	0	0	0	0	0	0
							RECQL		0	0	0	0	0	0	0	0	0
							REL		0	0	0	0	0	0	0	0	0
							REST		0	0	0	0	0	0	0	0	0
							RET		0	0	0	0	0	0	0	0	0
							REV3L		0	0	0	0	0	0	0	0	0
							RFXAP		0	0	0	0	0	0	0	0	0
							RGMB		0	0	0	0	0	0	0	0	0
							RHCG		1	1	0	0	0	0	0	0	0
							RHOC		0	0	0	0	0	0	0	0	0
							RIC8A		0	0	0	0	0	0	0	0	0
							RICTOR		0	0	0	0	0	0	0	0	0
							RNASEH1		0	0	0	0	0	0	0	0	0
							RNASEL		0	0	0	1	0	0	0	0	0
							RND3		0	0	0	0	0	0	0	0	0
							RNF125		0	0	0	0	0	0	0	0	0
							RNF141		0	0	0	0	0	0	0	0	0
							RNF149		0	0	0	0	0	0	0	0	0
							RNF34	inter+mi	0	0	0	0	0	0	0	0	0
							RNF4		0	0	0	0	0	0	0	0	0
							RNH1		0	0	0	0	0	0	0	0	0
							ROPN1L		0	0	0	0	0	0	0	0	0
							RORA		0	0	0	1	0	0	0	0	0
							RPA1		0	0	0	0	0	0	0	0	0
							RPL10A		0	0	0	0	0	0	0	0	0
							RPL13		0	0	0	0	0	0	0	0	0
							RPL13A		0	0	0	0	0	0	0	0	0
							RPL14		0	0	0	0	0	0	0	0	0
							RPL23		0	0	0	0	0	0	0	0	0
							RPL24		0	0	0	0	0	0	0	0	0
							RPL35A		0	0	0	0	0	0	0	0	0
							RPL7A		0	0	0	0	0	0	0	0	0
							RPL7L1		0	0	0	0	0	0	0	0	0
							RPL8		0	0	0	0	0	0	0	0	0
							RPL9		0	0	0	0	0	0	0	0	0
							RPLP1		0	0	0	0	0	0	0	0	0
							RPN2		0	0	0	0	0	0	0	0	0
							RPS15		1	0	0	0	0	0	0	0	0
							RPS15A		0	0	0	0	0	0	0	0	0
							RPS18		0	0	0	0	0	0	0	0	0
							RPS5		0	0	0	0	0	0	0	1	0
							RPS6KA4	inter+mi	0	0	0	0	0	0	0	0	0
							RPS6KA5		0	0	0	1	0	0	0	0	0
							RPS6KA6		0	0	0	0	0	0	0	0	0
							RPS6KB1		0	0	0	0	0	0	0	1	0
							RPS6KB2		0	0	0	0	0	0	0	0	0
							RRAGD		0	0	0	0	0	0	0	0	0
							RREB1		0	0	0	0	0	0	0	0	0
							RRM1		1	0	0	0	0	0	0	0	0
							RRN3		0	0	0	0	0	0	0	0	0
							RRP12		0	0	0	0	0	0	0	0	0
							RSBN1		0	0	0	0	0	0	0	0	0
							RSPH1		0	0	0	0	0	0	0	0	0
							RSPH9		0	0	0	0	0	0	0	0	0
							RTN2		0	0	0	0	0	0	0	0	0
							RTN3	inter+mi	1	0	0	0	0	0	0	0	0
							RUFY3		0	0	0	0	0	0	0	0	0
							RUNX1		0	1	1	0	0	0	0	0	0
							RUNX1T1		0	0	1	0	0	0	0	0	0
							RUNX3		0	0	0	0	0	0	0	0	0
							SAMD3		0	0	0	0	0	0	0	0	0
							SAMHD1		0	0	0	1	0	0	1	0	0
							SAP30		0	0	0	0	0	0	0	0	0
							SBNO2	inter+mi	1	0	0	0	0	0	0	0	0
							SCAF11		0	0	0	0	0	0	0	0	0
							SCAMP2		1	0	0	0	0	0	0	0	0
							SCARB1		0	0	0	0	0	0	0	0	0
							SCN5A		0	0	0	0	0	0	0	0	0
							SCP2		0	0	0	0	0	0	0	0	0
							SCUBE3		0	0	0	0	0	0	0	0	0
							SDF4		1	0	0	0	0	0	0	0	0
							SDHA		0	0	0	0	0	0	0	0	0
							SEC23B		0	0	0	0	0	0	0	0	0
							SEC63		0	0	0	0	0	0	0	0	0
							SECTM1		0	0	0	0	0	0	1	0	0
							SEMA3B		0	0	0	0	0	0	0	0	0
							SEMA3G		0	0	0	0	0	0	0	0	0
							SEMA4C		0	0	0	0	0	0	0	0	0
							SEMA4D		1	0	0	0	1	0	0	0	0
							SEMA7A	inter+mi	0	0	0	0	0	0	0	0	0
							SENP1		0	0	0	0	0	0	0	0	0
							SENP2		0	0	0	0	0	0	0	0	0
							SEPT2		0	0	0	0	0	0	0	0	0
							SERBP1		0	0	0	0	0	0	0	0	0
							SERPINE1		0	0	0	0	1	0	0	0	0
							SERTAD2		0	0	0	0	0	0	0	0	0
							SERTAD3	intra+mi	0	0	0	0	0	0	0	0	0
							SESN1		0	0	0	0	0	0	0	0	0
							SF3A1		1	0	0	0	0	0	0	0	0
							SFN		0	0	0	0	0	0	0	0	0
							SGK3		0	0	0	0	0	0	0	0	0
							SGMS1		0	0	0	0	0	0	0	0	0
							SGPL1		0	0	0	0	0	0	0	0	0
							SGPP1		0	0	0	0	0	0	0	0	0
							SH2B3		0	0	1	1	0	0	0	0	0
							SH2D2A		0	0	0	0	0	0	0	0	0
							SH3BP4		0	0	0	0	0	0	0	0	0
							SH3BP5		0	0	0	0	0	0	0	0	0
							SH3BP5L		0	0	0	0	0	0	0	0	0
							SH3GL1		1	1	0	0	0	0	0	0	0
							SH3GLB1		0	0	0	0	0	0	0	0	0
							SHC1		0	0	0	1	0	0	0	1	0
							SIGIRR		0	0	0	1	0	0	0	0	0
							SIGLEC9		0	0	0	0	0	0	0	0	0
							SIK1	inter+mi	0	0	0	0	0	0	0	0	0
							SIRPA		0	0	0	0	0	0	0	0	0
							SIRT1		0	0	0	0	0	0	0	1	0
							SIT1	inter+mi	1	0	0	0	0	0	0	0	0
							SIX1		0	0	0	0	0	0	0	0	0
							SIX4		0	0	0	0	0	0	0	0	0
							SKAP2		0	0	0	0	0	0	0	0	0
							SKI		1	0	0	0	0	0	0	0	0
							SKIL		0	0	0	0	0	0	0	0	0
							SLBP		0	0	0	0	0	0	0	0	0
							SLC11A1		0	0	0	0	0	0	0	0	0
							SLC11A2		0	0	0	0	1	0	0	0	0
							SLC15A3		0	0	0	0	0	0	0	0	0
							SLC25A30		0	0	0	0	0	0	0	0	0
							SLC25A32		0	0	0	0	0	0	0	0	0
							SLC25A44		0	1	0	0	0	0	0	0	0
							SLC25A46		0	0	0	0	0	0	0	0	0
							SLC2A3		0	0	0	0	0	0	0	0	0
							SLC33A1		0	0	0	0	0	0	0	0	0
							SLC37A3		0	0	0	0	0	0	0	0	0
							SLC39A6		0	0	0	0	0	0	0	0	0
							SLC39A8		0	0	0	0	0	0	0	0	0
							SLC5A5		1	0	0	0	0	0	0	0	0
							SLC9A1		0	0	0	0	0	0	0	0	0
							SLC9A8		0	0	0	0	0	0	0	0	0
							SLURP1		0	0	0	0	0	0	0	0	0
							SLX4		0	0	0	0	0	0	0	0	0
							SMAD2	inter+mi	0	0	0	0	0	0	0	1	0
							SMAD4		0	0	0	0	0	0	0	1	0
							SMAD6	inter+mi	0	0	0	0	0	0	0	0	0
							SMAD7		0	0	0	0	0	0	0	0	0
							SMARCA2		0	0	0	0	0	0	0	0	0
							SMARCA5		0	0	1	0	0	0	0	0	0
							SMARCB1		1	0	0	0	0	0	0	0	0
							SMC1A		0	0	0	0	0	0	0	0	0
							SMC4		0	0	0	0	0	0	0	0	0
							SMO		0	0	0	0	0	0	0	0	0
							SMOC1		0	0	0	0	0	0	0	0	0
							SMURF2		1	0	0	0	0	0	0	0	0
							SNAP25		0	0	0	1	0	0	0	0	0
							SNN		0	0	0	0	0	0	0	0	0
							SNRK		0	0	0	0	0	0	0	0	0
							SNRPA		0	0	0	0	0	0	0	0	0
							SNRPD1		0	0	0	0	0	0	0	0	0
							SNRPN		0	0	0	0	0	0	0	0	0
							SNTB2		0	0	0	0	0	0	0	0	0
							SNX10		1	0	0	0	0	0	0	0	0
							SNX2		0	0	0	0	0	0	0	0	0
							SNX4		0	0	0	0	0	0	0	0	0
							SOAT1		0	0	0	0	0	0	0	0	0
							SOCS5		0	0	0	1	0	0	0	0	0
							SOD2		0	0	0	1	0	0	1	0	0
							SON		0	0	0	0	0	0	0	0	0
							SOX18		1	1	0	0	0	0	0	0	0
							SOX4		0	0	0	0	0	0	0	0	0
							SP2		0	0	0	0	0	0	0	0	0
							SPAG9		0	0	0	0	0	0	0	0	0
							SPARC		0	0	0	0	0	0	0	0	0
							SPAST		0	0	0	0	0	0	0	0	0
							SPATA19		0	0	0	0	0	0	0	0	0
							SPATA6		0	0	0	0	0	0	0	0	0
							SPCS1		0	0	0	0	0	0	0	0	0
							SPECC1L		0	0	0	0	0	0	0	0	0
							SPG7		0	0	0	0	0	0	0	0	0
							SPI1	inter+mi	0	0	0	0	0	0	0	0	0
							SPIB		0	0	0	0	0	0	0	0	0
							SPOCK2		0	0	0	0	0	0	0	0	0
							SPON2		0	0	0	0	0	0	0	0	0
							SPRED2		0	0	0	0	0	0	0	0	0
							SPTBN2		0	0	0	0	0	0	0	0	0
							SRD5A1		0	0	0	0	0	0	0	0	0
							SRF		0	0	0	0	0	0	0	0	0
							SRFBP1		0	0	0	0	0	0	0	0	0
							SRGN		1	0	0	0	0	0	0	0	0
							SS18		0	0	0	0	0	0	0	0	0
							SSPO		0	0	0	0	0	0	0	0	0
							SSX2IP		0	0	0	0	0	0	0	0	0
							SSX5		0	0	0	0	0	0	0	0	0
							ST3GAL2		0	0	0	0	0	0	0	0	0
							STAB1		0	1	0	0	1	0	0	0	0
							STARD7		0	0	0	0	0	0	0	0	0
							STAT2		0	0	0	1	0	1	1	0	0
							STAT4		0	0	0	1	0	0	1	0	0
							STEAP3		0	0	0	0	0	0	0	0	0
							STK17B		0	0	0	0	0	0	0	0	0
							STK3		0	0	0	0	0	0	0	0	0
							STK38		0	0	0	0	0	0	0	0	0
							STK4		0	0	0	0	0	0	0	0	0
							STMN3		1	0	0	0	0	0	0	0	0
							STON1		0	0	0	0	0	0	0	0	0
							STON2		1	0	0	0	0	0	0	0	0
							STRN4		0	0	0	0	0	0	0	0	0
							STX4		0	0	0	1	0	0	0	0	0
							STYX		0	0	0	0	0	0	0	0	0
							SULT1B1		0	0	0	0	0	0	0	0	0
							SUMO1		0	0	0	1	0	0	0	1	0
							SUMO2		0	0	0	0	0	0	0	1	0
							SUMO3		0	0	0	0	0	0	0	0	0
							SUPT16H		0	0	0	0	0	0	0	0	0
							SUPT7L		0	0	0	0	0	0	0	0	0
							SURF1		0	0	0	0	0	0	0	0	0
							SURF4		0	0	0	0	0	0	0	0	0
							SUZ12		0	0	0	0	0	0	0	0	0
							SYNCRIP		0	0	0	0	0	0	0	0	0
							SYNJ1		0	0	0	0	0	0	0	0	0
							TAB3		0	0	0	1	0	0	0	0	0
							TACC1		0	0	0	0	0	0	0	0	0
							TAF8		0	0	0	0	0	0	0	0	0
							TAF9B		0	0	0	0	0	0	0	0	0
							TANK		0	0	0	0	0	0	0	0	0
							TAPBP		0	0	0	0	1	0	1	0	0
							TARDBP		0	1	0	0	0	0	0	0	0
							TAX1BP1		0	0	0	0	0	0	0	0	0
							TBC1D10C		0	0	0	0	0	0	0	0	0
							TBC1D8		0	0	0	0	0	0	0	0	0
							TBC1D9		0	0	0	0	0	0	0	0	0
							TBL1X		0	0	0	0	0	0	0	0	0
							TBL1XR1		0	0	0	0	0	0	0	0	0
							TBXAS1		0	0	0	0	0	0	0	0	0
							TCAM1P		0	0	0	0	0	0	0	0	0
							TCF7		0	0	0	0	0	0	0	0	0
							TCF7L2		0	0	0	0	0	0	0	0	0
							TCN2		0	0	0	0	0	0	0	0	0
							TCTN3		0	0	0	0	0	0	0	0	0
							TDG	inter+mi	0	0	0	0	0	0	0	0	0
							TECPR1		0	0	0	0	0	0	0	0	0
							TFAM		0	0	0	0	0	0	0	0	0
							TFG		0	0	0	0	0	0	0	0	0
							TFPI		0	0	0	0	0	0	0	0	0
							TFRC		0	0	0	0	0	0	0	0	0
							TGFB1	inter+mi	0	0	0	1	0	0	0	1	0
							TGFBR2		0	0	0	0	0	0	0	0	0
							THAP1		0	0	0	0	0	0	0	0	0
							THBD		0	0	0	0	0	0	0	0	0
							THEM4		0	0	0	0	0	0	0	0	0
							THOP1		0	0	0	0	0	0	0	0	0
							TIAL1		0	0	0	0	0	0	0	0	0
							TIAM2		0	0	0	0	0	0	0	0	0
							TICAM2		0	0	0	0	0	0	0	0	0
							TIFA		0	0	0	0	0	0	0	0	0
							TIMM17A		0	0	0	0	0	0	0	0	0
							TIMM50		0	0	0	0	0	0	0	0	0
							TIMP2	inter+mi	0	0	0	0	0	0	0	0	0
							TIRAP		0	0	0	0	0	0	0	0	0
							TLN1	inter+mi	1	0	0	0	0	0	0	0	0
							TLR3		0	0	0	0	1	0	0	0	0
							TLR7		0	0	0	0	0	0	0	0	0
							TLR9		0	0	0	0	0	0	0	0	0
							TMED10		0	0	0	0	0	0	0	0	0
							TMED4		0	0	0	0	0	0	0	0	0
							TMEM109		0	0	0	0	0	0	0	0	0
							TMEM185B		0	0	0	0	0	0	0	0	0
							TMEM38A		0	0	0	0	0	0	0	0	0
							TMEM55B		1	0	0	0	0	0	0	0	0
							TMEM9B		0	0	0	0	0	0	0	0	0
							TMPO		0	0	0	0	0	0	0	0	0
							TNFAIP3		0	0	0	0	0	0	1	0	0
							TNFAIP8L1	inter+mi	0	0	0	0	0	0	0	0	0
							TNFRSF10B		0	0	0	0	0	0	0	0	0
							TNFRSF12A		1	0	0	1	0	0	0	0	0
							TNFRSF13C		0	0	0	1	0	0	0	0	0
							TNFRSF18		1	1	0	1	0	0	0	0	0
							TNFRSF21		0	0	0	0	0	0	0	0	0
							TNFRSF4		1	1	0	1	0	0	0	0	0
							TNFSF13		0	0	0	1	0	0	0	0	0
							TNFSF13B		0	0	0	1	0	0	0	0	0
							TNIP3		0	0	0	0	0	0	0	0	0
							TNNI2		0	0	0	0	0	0	0	0	0
							TNNT3		0	0	0	0	0	0	0	0	0
							TNPO1		0	0	0	0	0	0	0	0	0
							TNRC6B		0	0	0	0	0	0	0	0	0
							TOB1		1	0	0	0	0	0	0	0	0
							TOB2		0	0	0	0	0	0	0	0	0
							TOP1		0	0	0	0	0	0	0	0	0
							TOR1B		0	0	0	0	0	0	1	0	0
							TP53INP1		0	0	0	0	0	0	0	0	0
							TPK1		0	0	0	0	0	0	0	0	0
							TPM4		1	0	0	0	0	0	0	0	0
							TRAF1		0	0	0	0	0	0	0	0	0
							TRAF3		0	0	0	1	0	0	0	0	0
							TRAF3IP1		0	0	0	0	0	0	0	0	0
							TRAF3IP2		0	0	0	0	0	0	0	0	0
							TRAF3IP3		0	0	0	0	0	0	0	0	0
							TRAIP	inter+mi	0	0	0	0	0	0	0	0	0
							TRAJ12		0	0	0	0	0	0	0	0	0
							TRAJ48		0	0	0	0	0	0	0	0	0
							TRAJ49		0	0	0	0	0	0	0	0	0
							TRAJ50		0	0	0	0	0	0	0	0	0
							TRAJ51		0	0	0	0	0	0	0	0	0
							TRAJ52		0	0	0	0	0	0	0	0	0
							TRAJ53		0	0	0	0	0	0	0	0	0
							TRAJ54		0	0	0	0	0	0	0	0	0
							TRAJ55		0	0	0	0	0	0	0	0	0
							TRAJ56		0	0	0	0	0	0	0	0	0
							TRAJ57		0	0	0	0	0	0	0	0	0
							TRAJ58		0	0	0	0	0	0	0	0	0
							TRAJ59		0	0	0	0	0	0	0	0	0
							TRAJ60		0	0	0	0	0	0	0	0	0
							TRAJ61		0	0	0	0	0	0	0	0	0
							TRAPPC2		0	0	0	0	0	0	0	0	0
							TRDC		0	0	0	0	0	0	0	0	0
							TRDD1		0	0	0	0	0	0	0	0	0
							TRDD2		0	0	0	0	0	0	0	0	0
							TRDD3		0	0	0	0	0	0	0	0	0
							TRDJ1		0	0	0	0	0	0	0	0	0
							TRDJ2		0	0	0	0	0	0	0	0	0
							TRDJ3		0	0	0	0	0	0	0	0	0
							TRDJ4		0	0	0	0	0	0	0	0	0
							TRDV2		0	0	0	0	0	0	0	0	0
							TRDV3		0	0	0	0	0	0	0	0	0
							TRIB3	inter+mi	1	0	0	0	0	0	0	0	0
							TRIM14		1	0	0	1	0	1	1	0	0
							TRIM23		0	0	0	0	0	0	0	0	0
							TRIM36		0	0	0	0	0	0	0	0	0
							TRIM37		0	0	0	0	0	0	0	0	0
							TRIM56		0	0	0	0	0	0	0	0	0
							TRIM65		0	0	0	0	0	0	0	0	0
							TRIM66		0	0	0	0	0	0	0	0	0
							TRIM8		0	0	0	1	0	0	0	0	0
							TRIO		0	0	0	0	0	0	0	0	0
							TRIP10		0	0	0	0	0	0	0	0	0
							TROAP		0	0	0	0	0	0	0	0	0
							TRPM2		1	0	0	0	0	0	0	0	0
							TRPV2		0	0	0	0	0	0	0	0	0
							TSC1		0	0	0	0	0	0	0	0	0
							TSC2		0	0	0	0	0	0	0	0	0
							TTC19		0	0	0	0	0	0	0	0	0
							TTPA		0	0	0	0	0	0	0	0	0
							TUBB4B		1	0	0	0	0	0	0	0	0
							TUBGCP3		0	0	0	0	0	0	0	0	0
							TUFM		0	0	0	0	0	0	0	0	0
							TULP4		0	0	0	0	0	0	0	0	0
							TWF1		0	0	0	0	0	0	0	0	0
							TWF2		0	0	0	0	0	0	0	0	0
							TWIST1		0	0	0	1	0	0	0	0	0
							TXK		1	0	0	0	0	0	0	0	0
							TXLNA		1	0	0	1	0	0	0	0	0
							TXNIP		0	0	0	0	0	1	1	0	0
							TXNL4A		0	0	0	0	0	0	0	0	0
							TYRO3		0	0	0	0	0	0	0	0	0
							U2AF2		1	0	0	0	0	0	0	0	0
							UACA		0	1	0	0	0	0	0	0	0
							UBA7		0	0	0	1	0	1	0	0	0
							UBASH3A		0	0	0	0	0	0	0	0	0
							UBE2B		0	0	0	0	0	0	0	0	0
							UBE2D1		0	0	0	1	0	0	0	0	0
							UBE2D2		0	0	0	1	0	0	0	0	0
							UBE2I		0	0	0	0	0	0	0	1	0
							UBE2N		0	0	0	1	0	0	0	1	0
							UBE2Q1		0	0	0	0	0	0	0	0	0
							UBE2Q2		0	0	0	0	0	0	0	0	0
							UBE2V1		0	0	0	1	0	0	0	0	0
							UBE2V2		0	0	0	0	0	0	0	0	0
							UBE2W		0	0	0	0	0	0	0	0	0
							UBE2Z		0	0	0	0	0	0	0	0	0
							UBQLN1		0	0	0	0	0	0	0	0	0
							UBTF		0	0	0	0	0	0	0	0	0
							UCKL1		1	0	0	0	0	0	0	0	0
							UCP2		0	0	0	0	0	0	0	0	0
							UFM1		0	0	0	0	0	0	0	0	0
							UGCG		0	0	0	0	0	0	0	0	0
							UGP2		0	0	0	0	0	0	0	0	0
							UGT8		0	0	0	0	0	0	0	0	0
							UHMK1		0	0	0	0	0	0	0	0	0
							ULK1		0	1	0	0	0	0	0	0	0
							ULK2		0	0	0	0	0	0	0	0	0
							UNC5B		0	0	0	0	0	0	0	0	0
							UNG		0	0	0	0	0	0	0	0	0
							UPP1		0	0	0	0	0	0	1	0	0
							UQCRC2		0	0	0	0	0	0	0	0	0
							UQCRFS1	DB+mi	0	0	0	0	0	0	0	0	0
							USP1		0	0	0	0	0	0	0	0	0
							USP14		0	0	0	0	0	0	0	0	0
							USP2		1	0	0	0	0	0	0	0	0
							USP28		0	0	0	0	0	0	0	0	0
							USP32		0	0	0	0	0	0	0	0	0
							USP9X		0	0	0	0	0	0	0	0	0
							UTP6		0	0	0	0	0	0	0	0	0
							VAV2		0	0	0	0	0	0	0	0	0
							VDAC1		0	0	0	0	0	0	0	0	0
							VDAC2		0	0	0	0	0	0	0	0	0
							VHL		0	0	0	0	0	0	0	0	0
							VLDLR		0	0	0	0	0	0	0	0	0
							VPS13C		0	0	1	0	0	0	0	0	0
							VPS33A		0	0	0	0	0	0	0	0	0
							VPS4A		0	0	0	0	0	0	0	0	0
							VPS8		0	0	0	0	0	0	0	0	0
							WASF2		0	0	0	0	0	0	0	0	0
							WASL		0	0	0	0	0	0	0	0	0
							WDR18		1	0	0	0	0	0	0	0	0
							WDR6		0	0	0	0	0	0	0	0	0
							WDR92		0	0	0	0	0	0	0	0	0
							WIPF2		1	0	0	0	0	0	0	0	0
							WNK1		0	0	0	0	0	0	0	0	0
							WNK3		0	0	1	0	0	0	0	0	0
							WNT3		0	0	0	0	0	0	0	0	0
							WNT9B		0	0	0	0	0	0	0	0	0
							WSB1		0	0	0	0	0	0	0	0	0
							WT1		0	0	0	0	0	0	0	0	0
							XIAP		0	0	0	0	0	0	0	0	0
							XK		0	0	0	0	0	0	0	0	0
							XPA		0	0	0	0	0	0	0	0	0
							XPNPEP3		0	0	0	0	0	0	0	0	0
							XPO1		0	0	0	0	0	0	0	1	0
							YARS		0	1	0	0	0	0	0	0	0
							YEATS4		0	0	0	0	0	0	0	0	0
							YES1		1	0	0	1	0	0	0	0	0
							YOD1		0	0	0	0	0	0	0	0	0
							YWHAE		0	0	0	0	0	0	0	1	0
							YWHAH		0	0	0	0	0	0	0	0	0
							YWHAZ		0	0	0	1	0	0	0	1	0
							YY1		0	0	0	0	0	0	0	0	0
							ZBED1		0	0	0	0	0	0	0	0	0
							ZBTB4		0	0	0	0	0	0	0	0	0
							ZBTB7A	inter+mi	0	0	0	0	0	0	0	0	0
							ZDHHC16		0	0	0	0	0	0	0	0	0
							ZFP30		0	0	0	0	0	0	0	0	0
							ZFP36		0	0	0	0	0	0	0	0	0
							ZFP91		0	0	0	0	0	0	0	0	0
							ZFYVE21		0	0	0	0	0	0	0	0	0
							ZFYVE9		0	0	0	0	0	0	0	0	0
							ZMAT3		0	0	0	0	0	0	0	0	0
							ZMYND11		0	0	0	0	0	0	0	0	0
							ZNF200		1	0	0	0	0	0	0	0	0
							ZNF230		0	0	0	0	0	0	0	0	0
							ZNF267		0	0	0	0	0	0	0	0	0
							ZNF292		0	0	0	0	0	0	0	0	0
							ZNF410		0	0	0	0	0	0	0	0	0
							ZNF443		0	0	0	0	0	0	0	0	0
							ZNF467		0	0	0	0	0	0	0	0	0
							ZNF611		0	0	0	0	0	0	0	0	0
							ZNF652		0	0	0	0	0	0	0	0	0
							ZNF665		0	0	0	0	0	0	0	0	0
							ZNF675		0	0	0	0	0	0	0	0	0
							ZNF770		0	0	0	0	0	0	0	0	0
							ZNF85		0	0	0	0	0	0	0	0	0
							ZNF91		0	0	0	0	0	0	0	0	0
							ZNFX1		0	0	0	0	0	0	1	0	0
							ZRANB2		0	0	0	0	0	0	0	0	0
									200	56	26	147	53	13	41	75	15
									0.129702	0.0363165	0.0168612	0.0953307	0.0343709	0.00843061	0.0265888	0.0486381	0.00972763

## Sheet: Cluster2
Feature	NDE	TCGA DB	hg19				all genes	found in/via	germ targets	germ genes	somatic	enrich1	inflam	alpha	gamma	top5%degree	top1%degree			germ+somatic
ENSG00000150540.12	0.2164	0					ACTB		0	0	0	0	0	0	0	1	1			CELSR3
cg22960952	0.0335	C4orf26;C4orf26;C4orf26;C4orf26;C4orf26	4	1913	1913		AKT1	inter+mi	1	0	0	1	0	0	0	1	1			KRAS
cg27560864	0.0272	SCN4B;SCN4B	11	2951	2951		CD4	inter+mi	1	1	0	1	0	0	0	1	1			LARS
hsa-mir-450a-1	0.0208	0					CTNNB1		0	0	0	0	0	0	0	1	1			NRAS
cg00534856	0.0135	0					EGFR		0	0	0	0	0	0	0	1	1			PEAR1
cg10935064	0.0125	CHPT1;CHPT1;SYCP3;SYCP3;SYCP3;SYCP3	12	2554	2554		EP300		0	0	0	0	0	0	0	1	1			PKHD1
cg15778232	0.009	EMG1;EMG1;EMG1;EMG1;PHB2;PHB2;PHB2;PHB2;PHB2;PHB2;PHB2;PHB2;PHB2;PHB2;PHB2;PHB2;RP3-461F17.3;RP3-461F17.3	12	178	178		ESR1		0	1	0	0	0	0	0	1	1			PLXNA2
cg03112433	0.0087	CDK14;CDK14;CDK14;CDK14;CDK14;CDK14;CDK14;CDK14;CDK14;CDK14;CDK14;CDK14	7	2259	2259		HRAS		0	0	0	1	0	0	0	1	1			PRKCZ
cg11726593	0.0082	IMPA1;IMPA1;IMPA1;IMPA1;IMPA1;IMPA1;IMPA1;IMPA1;IMPA1;IMPA1;IMPA1;IMPA1	8	2065	2065		HSP90AA1		0	0	0	1	0	0	0	1	1			RUNX1
cg03173722	0.008	RUFY3;RUFY3;RUFY3;RUFY3	4	1790	1790		HSPA8		0	0	0	1	0	0	0	1	1			AP1M1
cg22038738	0.0079	PLAT;PLAT;PLAT;PLAT;PLAT;PLAT	8	1052	1052		IL6		0	0	0	1	1	0	1	1	1			CAT
hsa-mir-548d-2	0.0078	0					JUN		0	0	0	1	0	0	0	1	1			DLG5
cg27478659	0.0068	KRT16;KRT16;KRT16;KRT16	17	995	995		MYC		1	0	0	1	1	0	0	1	1			PLEC
cg02863947	0.0067	NR1I2;NR1I2	3	2988	2988		PTEN		0	0	0	0	0	0	0	1	1			SMC5
hsa-mir-1266	0.0063	0					RPS27A		0	0	0	1	0	0	0	1	1			TPI1
hsa-mir-130a	0.0063	0					STAT3		0	0	0	1	0	0	1	1	1
cg00495491	0.006	0					TNF		1	1	0	1	0	0	0	1	1
cg15470750	0.006	FDPS;FDPS;FDPS;FDPS;FDPS;FDPS;FDPS;FDPS;FDPS;FDPS;FDPS;FDPS;FDPS;FDPS;FDPS;FDPS;FDPS	1	3882	3882		TP53		0	0	0	1	0	0	0	1	1
ENSG00000204103.3	0.0059	0					UBA52		0	0	0	1	0	0	0	1	1
cg12743398	0.0058	SULT1A2;SULT1A2	16	716	716		VEGFA		0	0	0	1	0	0	0	1	1
cg01636591	0.0057	CCL8	17	817	817		A4GALT		0	0	0	0	0	0	0	0	0
cg09997082	0.0056	GIPR;GIPR;GIPR;GIPR	19	1155	1155		AANAT		0	0	0	0	0	0	0	0	0
cg06362985	0.0055	RAB3IP;RAB3IP;RAB3IP;RAB3IP;RAB3IP;RAB3IP;RAB3IP;RAB3IP;RAB3IP;RP11-588G21.2;RP11-588G21.2	12	1754	1754		ABCA1		0	0	0	0	1	0	0	0	0
cg15489301	0.0053	AKR1B10;AKR1B10	7	3356	3356		ABCB7		0	0	0	0	0	0	0	0	0
cg16184943	0.0053	ZNF280B;ZNF280B	22	572	572		ABCB9		0	0	0	0	0	0	0	0	0
hsa-mir-25	0.0053	0					ABCD2		0	0	0	0	0	0	0	0	0
cg05365670	0.0051	LPCAT1;LPCAT1;LPCAT1	5	39	39		ABCE1		0	0	0	1	0	0	0	0	0
cg07393322	0.0051	A4GALT	22	1078	1078		ABCF2		0	0	0	0	0	0	0	0	0
cg10038087	0.0049	TLL2;TLL2	10	2457	2457		ABHD5		0	0	0	0	0	0	0	0	0
cg12402495	0.0048	C1orf43;C1orf43;C1orf43;C1orf43;C1orf43;C1orf43;UBAP2L;UBAP2L;UBAP2L;UBAP2L;UBAP2L;UBAP2L;UBAP2L;UBAP2L;UBAP2L	1	3855	3855		ABL2		0	1	0	1	0	0	0	0	0
hsa-mir-26a-2	0.0048	0					ACAA2		0	0	0	0	0	0	0	0	0
ENSG00000130529.14	0.0047	0					ACAN		0	0	0	0	0	0	0	0	0
ENSG00000197405.6	0.0047	0					ACIN1		1	0	0	0	0	0	0	0	0
cg01015871	0.0046	MT4	16	1415	1415		ACOX1		0	0	0	0	0	0	0	0	0
cg25935911	0.0045	BRINP1;BRINP1	9	3054	3054		ACP1		0	0	0	0	0	0	0	0	0
cg15753757	0.0044	AUTS2;AUTS2;AUTS2	7	1727	1727		ACP6		0	0	0	0	0	0	0	0	0
cg26499286	0.0044	KRTAP17-1	17	987	987		ACSL3		0	0	0	0	0	0	0	0	0
cg03391568	0.0042	MYL3;PTH1R	3	1173	1173		ACSL4		0	0	0	0	0	0	0	0	0
cg15781794	0.0042	CHCHD1;CHCHD1	10	1889	1889		ACTC1		0	0	0	0	0	0	0	0	0
cg04387658	0.0041	CD86;CD86;CD86;CD86	3	3045	3045		ACTG1		0	0	0	0	0	0	0	1	0
cg20870362	0.0041	CCIN	9	905	905		ACTL6A		0	0	0	0	0	0	0	0	0
cg22752533	0.0041	SLC12A5;SLC12A5;SLC12A5;SLC12A5;SLC12A5;SLC12A5;SLC12A5;SLC12A5;SLC12A5;SLC12A5;SLC12A5;SLC12A5;SLC12A5	20	1117	1117		ACTN4		0	0	0	0	0	0	0	0	0
cg06762858	0.004	0					ACTR2		0	0	0	0	0	0	0	0	0
cg10082991	0.004	RNF44;RNF44;RNF44;RNF44;RNF44	5	4400	4400		ACVR1		0	0	0	0	0	0	0	0	0
cg13694749	0.004	SCN4A;SCN4A	17	1552	1552		ACVRL1		0	0	0	0	0	0	0	0	0
cg18905252	0.004	0					ADAM15		1	0	0	0	0	0	0	0	0
cg11939047	0.0039	ICE2;ICE2;ICE2;ICE2;ICE2;ICE2;ICE2;ICE2;ICE2;ICE2;ICE2;ICE2;RORA-AS1;RORA-AS1;RORA-AS1;RORA-AS1	15	1520	1520		ADAM17		0	0	0	1	0	0	0	0	0
hsa-mir-378a	0.0039	0					ADAM19		1	0	0	0	0	0	0	0	0
cg04303269	0.0038	CEP57;CEP57;CEP57;CEP57;CEP57;CEP57;CEP57;CEP57;CEP57;CEP57;FAM76B;FAM76B;FAM76B;FAM76B;FAM76B;FAM76B;FAM76B;FAM76B;FAM76B	11	2389	2389		ADAMTS13		0	0	0	0	0	0	0	0	0
cg08398233	0.0038	CAMK2N1;CAMK2N1	1	521	521		ADAMTS5		0	0	0	0	0	0	0	0	0
cg27493997	0.0038	CRABP2;CRABP2;CRABP2;CRABP2	1	3917	3917		ADAR		0	0	0	1	0	1	1	0	0
hsa-mir-181a-2	0.0038	0					ADARB1		0	0	1	0	0	0	0	0	0
hsa-mir-181b-1	0.0038	0					ADARB2		0	1	0	0	0	0	0	0	0
cg11254522	0.0037	FGR;FGR;FGR;FGR;FGR;FGR;FGR	1	699	699		ADAT1	inter+mi	1	0	0	0	0	0	0	0	0
cg22699062	0.0037	HSP90B1;HSP90B1;HSP90B1;HSP90B1;HSP90B1;HSP90B1;RP11-642P15.1;RP11-642P15.1	12	2609	2609		ADCY9		0	0	0	0	0	0	0	0	0
cg03126490	0.0036	RP11-307N16.6;SPATA13;SPATA13;SPATA13;SPATA13	13	619	619		ADCYAP1		0	0	0	0	0	0	0	0	0
cg27305303	0.0036	OTOF;OTOF	2	670	670		ADD3		0	0	0	0	0	0	0	0	0
cg00420929	0.0035	PGPEP1;PGPEP1;PGPEP1;PGPEP1;PGPEP1;PGPEP1;PGPEP1	19	462	462		ADIPOQ		0	0	0	0	0	0	0	0	0
cg01466075	0.0035	EIF2A;EIF2A;EIF2A;EIF2A;EIF2A;EIF2A;EIF2A;EIF2A;EIF2A;EIF2A;EIF2A;EIF2A;SERP1;SERP1;SERP1;SERP1	3	3757	3757		ADK		0	0	0	0	0	0	0	0	0
cg04809136	0.0034	FAM228B;FAM228B;FAM228B;FAM228B;SF3B6;SF3B6	2	608	608		ADM		0	0	0	0	1	0	0	0	0
cg07363637	0.0034	SLC44A4;SLC44A4;SLC44A4;SLC44A4;SLC44A4	6	797	797		ADSL		0	0	0	0	0	0	0	0	0
cg09196942	0.0034	0					AEN		0	0	0	0	0	0	0	0	0
cg16825000	0.0034	PLA2G2E	1	507	507		AGK		0	0	0	0	0	0	0	0	0
cg04047710	0.0033	C21orf62-AS1;C21orf62-AS1;C21orf62-AS1;C21orf62-AS1;C21orf62-AS1;C21orf62-AS1;C21orf62-AS1;PAXBP1;PAXBP1;PAXBP1;PAXBP1;PAXBP1	21	854	854		AGPAT5		0	0	0	0	0	0	0	0	0
cg04398282	0.0033	STAP1;STAP1	4	1711	1711		AHR		0	0	0	0	1	0	0	0	0
cg12466095	0.0033	ATG2B;ATG2B	14	2420	2420		AIF1L		0	0	0	0	0	0	0	0	0
cg17994910	0.0033	CCDC30;CCDC30;CCDC30;CCDC30	1	1074	1074		AKAP10		0	0	0	0	0	0	0	0	0
cg18462653	0.0033	DEFB119;DEFB119;DEFB119;DEFB119	20	750	750		AKAP11		0	0	0	0	0	0	0	0	0
cg26922202	0.0033	0					AKAP8L		0	0	0	0	0	0	0	0	0
hsa-mir-181b-2	0.0033	0					AKIRIN2		0	0	0	0	0	0	0	0	0
cg01813334	0.0032	EIF3B;EIF3B;EIF3B;EIF3B;SNX8;SNX8	7	60	60		AKR7A2		0	1	0	0	0	0	0	0	0
cg03222066	0.0032	ABCG4;ABCG4;ABCG4;ABCG4	11	2976	2976		AKT1S1		0	0	0	0	0	0	0	0	0
cg03802231	0.0032	FNTA;FNTA;FNTA;FNTA;FNTA;FNTA;FNTA;FNTA;FNTA;FNTA;FNTA;RP11-598P20.5	8	1073	1073		ALAS1		0	0	0	0	0	0	0	0	0
cg03826976	0.0032	CYB5R2;CYB5R2;CYB5R2;CYB5R2;CYB5R2;CYB5R2;CYB5R2;CYB5R2;CYB5R2;CYB5R2;CYB5R2	11	193	193		ALDH1A1		0	0	0	0	0	0	0	0	0
cg04881903	0.0032	CAPG;CAPG;CAPG;CAPG;CAPG;CAPG;CAPG;CAPG;CAPG;CAPG;CAPG;CAPG	2	2141	2141		ALDH5A1		0	0	0	0	0	0	0	0	0
cg10055471	0.0032	NR0B2;NUDC	1	682	682		ALDH6A1		0	0	1	0	0	0	0	0	0
cg11848539	0.0032	TNFRSF21	6	1182	1182		ALDOB		0	0	0	0	0	0	0	0	0
cg17886959	0.0032	MT2A;MT2A;MT2A;MT2A;MT2A	16	1417	1417		ALG1		0	0	0	0	0	0	0	0	0
cg21792737	0.0032	NOX3	6	3895	3895		AMD1		0	0	0	0	0	0	0	0	0
cg26385222	0.0032	TMEM176A;TMEM176A;TMEM176A;TMEM176A;TMEM176B;TMEM176B;TMEM176B;TMEM176B;TMEM176B	7	3763	3763		AMICA1		0	0	1	0	0	0	0	0	0
ENSG00000103196.10	0.0032	0					AMOTL1		0	0	0	0	0	0	0	0	0
cg02274362	0.0031	0					ANAPC1		0	0	0	0	0	0	0	0	0
cg03064067	0.0031	SLC6A15;SLC6A15;SLC6A15;SLC6A15;SLC6A15;SLC6A15;SLC6A15;SLC6A15	12	2133	2133		ANGPT2		0	0	0	0	0	0	0	0	0
cg03938043	0.0031	DTL;DTL;DTL;INTS7;INTS7;INTS7;INTS7;INTS7;INTS7	1	5306	5306		ANGPT4		0	0	0	0	0	0	0	0	0
cg04856685	0.0031	MAP4;MAP4;MAP4;MAP4;MAP4	3	1204	1204		ANGPTL3		0	0	0	0	0	0	0	0	0
cg06255524	0.0031	DNAJC3;DNAJC3;DNAJC3-AS1;DNAJC3-AS1	13	2409	2409		ANKRD13C		0	0	0	0	0	0	0	0	0
cg17628717	0.0031	HECW1;HECW1;HECW1;HECW1;HECW1	7	1084	1084		ANP32B		0	0	0	0	0	0	0	0	0
cg18350391	0.0031	IL32;IL32;IL32;IL32;IL32;IL32;IL32;IL32;IL32;IL32;IL32;IL32;IL32;IL32;IL32;IL32;IL32;IL32;IL32;IL32;IL32;IL32;IL32;IL32;IL32;IL32;IL32;IL32;IL32;IL32;IL32;IL32;IL32	16	78	78		ANXA11		0	0	0	0	0	0	0	0	0
cg18752880	0.0031	C1QTNF3;C1QTNF3;C1QTNF3;C1QTNF3-AMACR	5	852	852		ANXA5		0	0	0	0	0	0	0	1	0
cg22110492	0.0031	ADAMTS13;REXO4;REXO4;REXO4;REXO4;REXO4	9	3408	3408		AP1B1		0	0	0	0	0	0	0	0	0
cg03776060	0.003	AIF1L;AIF1L;AIF1L;AIF1L;AIF1L;AIF1L;AIF1L;AIF1L;AIF1L	9	3350	3350		AP1M1		1	0	1	0	0	0	0	0	0
cg15691841	0.003	RP11-126K1.2;RP11-126K1.2;ZNF687;ZNF687;ZNF687;ZNF687	1	3782	3782		AP1S2		0	0	0	0	0	0	0	0	0
cg23101680	0.003	SPERT;SPERT;SPERT;SPERT	13	1157	1157		AP1S3		0	0	0	0	0	0	0	0	0
cg26829529	0.003	SPACA3;SPACA3;SPACA3;SPACA3	17	783	783		AP2S1		0	0	0	0	0	0	0	0	0
hsa-mir-6877	0.003	0					AP3B1		0	1	0	0	0	0	0	0	0
cg01193293	0.0029	SIGLEC7;SIGLEC7;SIGLEC7;SIGLEC7;SIGLEC7	19	1292	1292		AP4B1		0	0	0	0	0	0	0	0	0
cg01605984	0.0028	MED22;MED22;MED22;MED22;MED22;MED22;MED22;MED22;RPL7A;RPL7A;RPL7A;RPL7A;RPL7A;RPL7A;RPL7A;RPL7A;SNORD24;SNORD36A;SNORD36B	9	3406	3406		APBA1		0	0	0	0	0	0	0	0	0
cg07957491	0.0028	UCK1;UCK1;UCK1;UCK1;UCK1;UCK1;UCK1	9	3361	3361		APOBEC3A		0	0	0	0	0	0	0	0	0
cg10001720	0.0028	LAPTM5;LAPTM5	1	781	781		APOBEC3F		0	0	0	0	0	0	0	0	0
cg10135708	0.0028	UCN2	3	1216	1216		APOH		0	0	0	0	0	0	0	0	0
cg12000587	0.0028	COPRS;COPRS;COPRS;COPRS;COPRS	17	755	755		APOL1		0	0	0	0	0	0	0	0	0
cg13771579	0.0028	RP11-1070N10.6;RP11-1070N10.6;RP11-1070N10.6;RP11-1070N10.6;TCL1B;TCL1B	14	2404	2404		APP		0	0	0	1	0	0	0	1	0
cg20179697	0.0028	SNX9;SNX9;SNX9	6	3957	3957		AQP3		0	0	0	0	0	0	0	0	0
cg22736354	0.0028	NHLRC1	6	454	454		AQR		0	0	0	0	0	0	0	0	0
cg25066857	0.0028	GNLY;GNLY;GNLY;GNLY;GNLY;GNLY;GNLY;GNLY;GNLY;GNLY;GNLY;GNLY;GNLY;GNLY	2	2149	2149		AR		0	0	0	0	0	0	0	1	0
cg25665697	0.0028	LCTL;LCTL;LCTL;LCTL;LCTL	15	1672	1672		ARC		0	0	0	0	0	0	0	0	0
hsa-mir-1292	0.0028	0					ARF6		0	0	0	0	0	0	0	0	0
cg01603095	0.0027	SLC2A13;SLC2A13	12	1013	1013		ARFIP2		0	0	0	0	0	0	0	0	0
cg01875775	0.0027	CHEK2;CHEK2;CHEK2;CHEK2;CHEK2;CHEK2;CHEK2;CHEK2;CHEK2;CHEK2;HSCB;HSCB;HSCB;HSCB;HSCB;HSCB;HSCB	22	729	729		ARHGAP17		0	0	0	0	0	0	0	0	0
cg01999523	0.0027	CLASP2;CLASP2;CLASP2;CLASP2	3	844	844		ARHGDIA		0	0	0	0	0	0	0	0	0
cg12530021	0.0027	SIGLEC12;SIGLEC12;SIGLEC12	19	1301	1301		ARHGEF11		0	0	0	0	0	0	0	0	0
cg12610070	0.0027	TSPAN15;TSPAN15	10	1781	1781		ARID5B		0	0	0	0	0	0	1	0	0
cg13614181	0.0027	RGCC	13	1051	1051		ARL4C		0	0	0	0	0	0	0	0	0
cg19258882	0.0027	ERBB3;ERBB3;ERBB3;ERBB3;ERBB3;ERBB3;ERBB3;ERBB3	12	1412	1412		ARL5A		0	0	0	0	0	0	0	0	0
cg20125159	0.0027	BTF3L4;BTF3L4;BTF3L4;BTF3L4;BTF3L4;BTF3L4;BTF3L4;BTF3L4;TXNDC12;TXNDC12;TXNDC12	1	1314	1314		ARL6IP6		0	0	0	0	0	0	0	0	0
cg20461541	0.0027	PRKRIR;PRKRIR;RP11-111M22.2;RP11-111M22.2;RP11-111M22.2;RP11-111M22.2;RP11-111M22.2;RP11-111M22.2;RP11-111M22.2	11	1903	1903		ARL8A		0	0	0	0	0	0	0	0	0
cg23196133	0.0027	POLR2A;POLR2A;POLR2A;ZBTB4	17	185	185		ARPC2		0	0	0	0	0	0	0	0	0
cg24747396	0.0027	BAP1;BAP1;BAP1;BAP1;BAP1;PHF7;PHF7;PHF7;PHF7;PHF7	3	1312	1312		ARPC3		0	0	0	0	0	0	0	0	0
hsa-mir-3653	0.0027	0					ARPC5L		0	0	0	0	0	0	0	0	0
ENSG00000185339.7	0.0027	0					ARRB2		0	0	0	0	0	0	0	0	0
cg00768439	0.0026	FAM133A;FAM133A;NAP1L3;NAP1L3	23	2324	2324		ASB1		0	0	0	0	0	0	0	0	0
cg12073949	0.0026	RPTOR;RPTOR;RPTOR;RPTOR;RPTOR;RPTOR	17	1963	1963		ASCC2		1	0	0	0	0	0	0	0	0
cg15804973	0.0026	MAP3K5	6	3428	3428		ASGR2		0	0	0	0	0	0	0	0	0
cg24798047	0.0026	GOLT1A	1	5105	5105		ASS1		0	0	0	0	0	0	0	0	0
hsa-mir-542	0.0026	0					ASTN1		0	0	0	0	0	0	0	0	0
							ATF7IP		0	0	0	0	0	0	0	0	0
							ATG16L1		0	0	1	0	0	0	0	0	0
							ATG5		0	0	0	0	0	0	0	0	0
							ATG7		0	0	0	0	0	0	0	0	0
							ATHL1		0	0	0	0	0	0	0	0	0
							ATL2		1	1	0	0	0	0	0	0	0
							ATM		0	0	0	0	0	0	0	1	0
							ATP1A1		0	0	0	0	0	0	0	0	0
							ATP2A2		0	0	0	0	1	0	0	0	0
							ATP2B1		0	0	0	0	1	0	0	0	0
							ATP5A1	inter+mi	0	0	0	0	0	0	0	0	0
							ATP5G3		1	1	0	0	0	0	0	0	0
							ATP5S		0	0	0	0	0	0	0	0	0
							ATP6V1C1		0	0	0	0	0	0	0	0	0
							ATP8A1		0	0	0	0	0	0	0	0	0
							ATP9A		0	0	0	0	0	0	0	0	0
							ATRNL1		0	0	0	0	0	0	0	0	0
							ATXN7		0	0	0	0	0	0	0	0	0
							AURKAIP1		0	0	0	0	0	0	0	0	0
							AUTS2		0	1	0	0	0	0	1	0	0
							B3GALNT1		0	0	0	0	0	0	0	0	0
							BACH1		0	0	0	0	0	0	0	0	0
							BAG2		0	0	0	0	0	0	0	0	0
							BAG4		0	0	0	0	0	0	0	0	0
							BAG5		0	0	0	0	0	0	0	0	0
							BAG6		0	0	0	0	0	0	0	0	0
							BAK1		0	0	0	0	0	0	0	0	0
							BAMBI		0	0	0	0	0	0	0	0	0
							BASP1		0	0	0	0	0	0	0	0	0
							BAX		0	0	0	0	0	0	0	0	0
							BAZ1A		0	0	0	0	0	0	0	0	0
							BBC3		0	0	0	0	0	0	0	0	0
							BCAN		0	0	0	0	0	0	0	0	0
							BCL10		1	0	0	0	0	0	0	0	0
							BCL11B		0	0	0	0	0	0	0	0	0
							BCL2		0	0	0	1	0	0	0	0	0
							BCL2L11		0	0	0	1	0	0	0	0	0
							BCL2L2		0	0	0	0	0	0	0	0	0
							BCL7B		0	0	0	0	0	0	0	0	0
							BCL9L		0	0	0	0	0	0	0	0	0
							BCR		1	0	0	0	0	0	0	0	0
							BID		1	1	0	0	0	0	0	0	0
							BIRC5		0	0	0	1	0	0	0	0	0
							BLCAP		0	0	0	0	0	0	0	0	0
							BLOC1S2		0	0	0	0	0	0	0	0	0
							BLOC1S3		0	0	0	0	0	0	0	0	0
							BMI1		0	0	0	0	0	0	0	0	0
							BMP2		0	0	0	0	0	0	0	0	0
							BMP3		0	0	0	0	0	0	0	0	0
							BMP5		0	0	0	0	0	0	0	0	0
							BMP7		0	0	0	0	0	0	0	0	0
							BMP8A		0	0	0	0	0	0	0	0	0
							BMPR1A		0	0	0	0	0	0	0	0	0
							BMPR2		0	0	0	0	0	0	0	0	0
							BNIP3L		0	0	0	0	0	0	0	0	0
							BRAF		0	0	0	0	0	0	0	0	0
							BRCA1		0	0	0	0	0	0	0	1	0
							BRD4		0	0	0	0	0	0	0	0	0
							BTBD9		0	1	0	0	0	0	0	0	0
							BTF3L4	DB+mi	0	0	0	0	0	0	0	0	0
							BTG1		0	0	0	0	0	0	1	0	0
							BTG2		0	0	0	0	1	0	0	0	0
							BTLA		0	0	0	0	0	0	0	0	0
							BUB1		0	0	0	0	0	0	0	0	0
							BUB3		0	0	0	0	0	0	0	0	0
							BYSL		0	0	0	0	0	0	0	0	0
							BZW1		0	0	0	0	0	0	0	0	0
							C11orf58		0	0	0	0	0	0	0	0	0
							C12orf10		0	0	0	0	0	0	0	0	0
							C12orf29		0	0	0	0	0	0	0	0	0
							C12orf57		1	0	0	0	0	0	0	0	0
							C19orf24		0	0	0	0	0	0	0	0	0
							C1D		0	0	0	0	0	0	0	0	0
							C1GALT1C1		0	0	0	0	0	0	0	0	0
							C1orf109		1	1	0	0	0	0	0	0	0
							C1orf43		0	0	0	0	0	0	0	0	0
							C1QBP		0	0	0	0	0	0	0	0	0
							C1QTNF3		0	0	0	0	0	0	0	0	0
							C1QTNF9		0	0	0	0	0	0	0	0	0
							C1S		0	0	0	0	0	1	1	0	0
							C2		0	0	0	0	0	0	0	0	0
							C20orf112		0	0	0	0	0	0	0	0	0
							C20orf24		0	0	0	0	0	0	0	0	0
							C21orf33		0	0	0	0	0	0	0	0	0
							C22orf29		0	0	0	0	0	0	0	0	0
							C2CD2L		1	0	0	0	0	0	0	0	0
							C3		0	0	0	0	0	0	0	0	0
							C3orf38		0	0	0	0	0	0	0	0	0
							C4A		0	0	0	0	0	0	0	0	0
							C5AR1		0	0	0	0	1	0	0	0	0
							C6orf48		0	0	0	0	0	0	0	0	0
							C8A		0	0	0	0	0	0	0	0	0
							CA2		0	0	0	0	0	0	0	0	0
							CAB39		0	0	0	0	0	0	0	0	0
							CABIN1		0	0	0	0	0	0	0	0	0
							CACTIN		0	0	0	0	0	0	0	0	0
							CADPS2		0	0	0	0	0	0	0	0	0
							CALM2		0	0	0	0	0	0	0	0	0
							CALM3	inter+mi	0	0	1	0	0	0	0	0	0
							CALR		0	0	0	0	0	0	0	0	0
							CAMK2G		0	0	0	1	0	0	0	0	0
							CAMK4		0	0	0	0	0	0	0	0	0
							CAMLG		0	0	0	0	0	0	0	0	0
							CAPN10		0	0	0	0	0	0	0	0	0
							CAPN7		0	0	1	0	0	0	0	0	0
							CAPRIN2		0	0	0	0	0	0	0	0	0
							CAPZA1		0	0	0	1	0	0	0	0	0
							CAPZA2		0	0	0	0	0	0	0	0	0
							CARD10		0	0	0	0	0	0	0	0	0
							CARD6		0	0	1	0	0	0	0	0	0
							CARD9		0	0	0	0	0	0	0	0	0
							CASP6		0	0	0	0	0	0	0	0	0
							CASS4		0	0	0	0	0	0	0	0	0
							CAT		1	0	1	0	0	0	0	1	0
							CBL		1	1	0	1	0	0	0	0	0
							CBX3		0	0	0	0	0	0	0	0	0
							CBX4		0	0	0	0	0	0	0	0	0
							CBX7		0	0	0	0	0	0	0	0	0
							CBY1		0	0	0	0	0	0	0	0	0
							CCBE1		0	0	0	0	0	0	0	0	0
							CCDC109B		0	0	0	0	0	0	0	0	0
							CCDC115		0	0	0	0	0	0	0	0	0
							CCDC12		0	0	0	0	0	0	0	0	0
							CCDC6		0	1	0	0	0	0	0	0	0
							CCL22		1	0	0	1	1	0	0	0	0
							CCL26		1	0	0	0	0	0	0	0	0
							CCL8		0	0	0	0	0	0	0	0	0
							CCNA2		0	0	0	0	0	0	0	0	0
							CCND2		0	0	0	0	0	0	0	0	0
							CCNE1		0	0	0	0	0	0	0	0	0
							CCNG1		0	0	0	0	0	0	0	0	0
							CCNT1		0	0	0	0	0	0	0	0	0
							CCR4		0	0	0	0	0	0	0	0	0
							CCR5		0	0	0	1	0	0	0	0	0
							CCR6		0	0	0	0	0	0	0	0	0
							CCT6A		0	0	0	0	0	0	0	0	0
							CCT7		0	0	0	0	0	0	0	1	0
							CD151		1	0	0	0	0	0	0	0	0
							CD164		0	0	0	0	0	0	0	0	0
							CD164L2		0	0	0	0	0	0	0	0	0
							CD180		0	0	0	0	0	0	0	0	0
							CD1D		0	0	0	0	0	0	0	0	0
							CD226		0	0	0	0	0	0	0	0	0
							CD3D		0	0	0	0	0	0	0	0	0
							CD46		0	0	0	0	0	0	0	0	0
							CD47		0	0	1	0	0	1	0	0	0
							CD55		0	0	0	0	1	0	0	0	0
							CD59		0	0	0	0	0	0	0	0	0
							CD79B		0	0	0	0	0	0	0	0	0
							CD84		0	0	0	0	0	0	0	0	0
							CD86		0	0	0	1	0	0	1	0	0
							CD96		0	0	0	0	0	0	0	0	0
							CDADC1		0	0	0	0	0	0	0	0	0
							CDC25A		1	0	0	0	0	0	0	0	0
							CDC73		0	0	0	0	0	0	0	0	0
							CDH1		0	0	0	0	0	0	0	1	0
							CDH13		0	1	0	0	0	0	0	0	0
							CDH23		1	0	0	0	0	0	0	0	0
							CDH7		0	0	0	0	0	0	0	0	0
							CDHR2		1	0	0	0	0	0	0	0	0
							CDHR4		0	0	0	0	0	0	0	0	0
							CDK19		0	0	0	0	0	0	0	0	0
							CDK2AP2		0	0	0	0	0	0	0	0	0
							CDK4		0	0	0	0	0	0	0	1	0
							CDK5		0	0	0	0	0	0	0	0	0
							CDK5R1		0	0	0	0	0	0	0	0	0
							CDK6		0	0	0	0	0	0	0	0	0
							CDK8		0	0	0	0	0	0	0	0	0
							CDK9		1	0	0	0	0	0	0	0	0
							CDKN1A		0	0	0	1	1	0	1	1	0
							CDKN1B		1	0	0	1	0	0	0	0	0
							CDKN1C		1	0	0	0	0	0	0	0	0
							CDV3		0	0	0	0	0	0	0	0	0
							CDX2		0	0	0	0	0	0	0	0	0
							CEACAM18		0	0	0	0	0	0	0	0	0
							CEACAM5		0	0	0	0	0	0	0	0	0
							CEBPA		0	1	0	0	0	0	0	0	0
							CEBPG		0	0	0	0	0	0	0	0	0
							CELSR3	intra+mi	0	1	1	0	0	0	0	0	0
							CEP164		0	0	0	0	0	0	0	0	0
							CEP170		0	0	0	0	0	0	0	0	0
							CEP57		0	0	0	0	0	0	0	0	0
							CERCAM		0	0	0	0	0	0	0	0	0
							CES2		0	0	0	0	0	0	0	0	0
							CETP		0	0	0	0	0	0	0	0	0
							CFB		0	0	0	0	0	0	1	0	0
							CFI	inter+mi	0	0	0	0	0	0	0	0	0
							CFLAR		0	0	0	0	0	0	0	0	0
							CHAC1		1	0	0	0	0	0	0	0	0
							CHD1		0	0	0	0	0	0	0	0	0
							CHD9		0	0	0	0	0	0	0	0	0
							CHEK2	DB+intra+mi	0	0	0	0	0	0	0	0	0
							CHERP		0	0	0	0	0	0	0	0	0
							CHGA		1	1	0	0	0	0	0	0	0
							CHL1		0	0	0	0	0	0	0	0	0
							CHMP4A		0	0	0	0	0	0	0	0	0
							CHP1		0	0	0	0	0	0	0	0	0
							CHPT1		1	0	0	0	0	0	0	0	0
							CHRNB2		0	0	0	0	0	0	0	0	0
							CHST4		0	0	0	0	0	0	0	0	0
							CHST6	inter+mi	0	0	0	0	0	0	0	0	0
							CIAO1		0	0	0	0	0	0	0	0	0
							CIB4		0	0	0	0	0	0	0	0	0
							CIDEC		0	0	0	0	0	0	0	0	0
							CKAP4		0	0	1	0	0	0	0	0	0
							CLCC1		0	0	0	0	0	0	0	0	0
							CLCN3		1	0	0	0	0	0	0	0	0
							CLDN12		0	0	0	0	0	0	0	0	0
							CLDN16		0	0	0	0	0	0	0	0	0
							CLDN6		1	0	0	0	0	0	0	0	0
							CLDN9		1	0	0	0	0	0	0	0	0
							CLEC4D		0	0	0	0	0	0	0	0	0
							CLIC1		1	0	0	0	0	0	0	0	0
							CLIC4		0	0	0	0	0	0	0	0	0
							CLIP1		0	0	0	0	0	0	0	0	0
							CLN8		0	1	0	0	0	0	0	0	0
							CLNK		0	0	0	0	0	0	0	0	0
							CLSTN1		0	0	1	0	0	0	0	0	0
							CLTA	intra+mi	0	0	0	0	0	0	0	0	0
							CLTB		0	0	0	0	0	0	0	0	0
							CLU		0	0	0	0	0	0	0	0	0
							CMTM6		0	0	0	0	0	0	0	0	0
							CNBP		1	0	0	0	0	0	0	0	0
							CNO		1	0	0	0	0	0	0	0	0
							CNOT4		0	0	0	0	0	0	0	0	0
							COL16A1		0	0	0	0	0	0	0	0	0
							COL18A1		1	1	0	0	0	0	0	0	0
							COL1A1		0	0	0	0	0	0	0	0	0
							COL1A2		0	0	0	1	0	0	0	0	0
							COL27A1		1	0	0	0	0	0	0	0	0
							COL4A1		1	0	0	0	0	0	0	0	0
							COL4A3		0	1	0	0	0	0	0	0	0
							COL4A3BP		0	0	0	0	0	0	0	0	0
							COL5A1		0	1	0	0	0	0	0	0	0
							COL7A1		0	0	0	0	0	0	0	0	0
							COL9A2		0	0	0	0	0	0	0	0	0
							COMMD2		0	0	0	0	0	0	0	0	0
							COPG		0	0	0	0	0	0	0	0	0
							COPS2		0	0	0	0	0	0	0	0	0
							COPS3		0	0	0	0	0	0	0	0	0
							CORO2A		1	0	0	0	0	0	0	0	0
							COX5A		1	0	0	0	0	0	0	0	0
							COX6C		0	0	0	0	0	0	0	0	0
							CPEB4		0	0	0	0	0	0	0	0	0
							CPOX		0	0	0	0	0	0	0	0	0
							CPT1A		0	0	0	0	0	0	0	0	0
							CPT2		0	0	0	0	0	0	0	0	0
							CPXM2		0	0	0	0	0	0	0	0	0
							CRCP		0	0	0	0	0	0	0	0	0
							CREB1		0	0	0	1	0	0	0	1	0
							CREBZF		0	0	0	0	0	0	0	0	0
							CREM		0	0	0	0	0	0	0	0	0
							CSDE1		0	0	0	0	0	0	0	0	0
							CSE1L		0	0	0	0	0	0	0	0	0
							CSF1		0	0	0	1	1	1	0	0	0
							CSNK2A1		1	0	0	0	0	0	0	0	0
							CSRNP3		0	0	0	0	0	0	0	0	0
							CTBP1		0	0	0	0	0	0	0	0	0
							CTDSPL		0	0	0	0	0	0	0	0	0
							CTGF		0	0	0	0	0	0	0	0	0
							CTNNBL1		0	0	0	0	0	0	0	0	0
							CTSA		0	0	0	0	0	0	0	0	0
							CTSD		0	0	0	0	0	0	0	0	0
							CTSE		0	0	0	0	0	0	0	0	0
							CTSZ		0	0	0	0	0	0	0	0	0
							CUL3		0	0	0	0	0	0	0	0	0
							CUL5		0	0	0	1	0	0	0	0	0
							CYCS		0	0	0	0	0	0	0	1	0
							CYLD		0	0	1	0	0	0	0	0	0
							CYP19A1		0	0	0	0	0	0	0	0	0
							CYP1B1		0	0	0	0	0	0	0	0	0
							CYP27B1		0	0	0	0	0	0	0	0	0
							CYP4V2		0	0	0	0	0	0	0	0	0
							CYTH2		0	0	0	0	0	0	0	0	0
							CYTIP		0	0	0	0	0	0	0	0	0
							DAD1		0	0	0	0	0	0	0	0	0
							DAND5		0	0	0	0	0	0	0	0	0
							DAPK1		1	0	0	0	0	0	0	0	0
							DARS		0	0	0	0	0	0	0	0	0
							DAXX		0	0	0	0	0	0	0	0	0
							DAZAP1		1	0	0	0	0	0	0	0	0
							DCBLD2		0	0	1	0	1	0	0	0	0
							DCUN1D3		0	0	0	0	0	0	0	0	0
							DDB1		0	0	0	0	0	0	0	0	0
							DDHD1		0	0	0	0	0	0	0	0	0
							DDIT4		0	0	0	0	0	0	0	0	0
							DDX19B		0	0	0	0	0	0	0	0	0
							DDX27		0	0	0	0	0	0	0	0	0
							DDX3X		0	0	0	0	0	0	0	0	0
							DEFB119		0	0	0	0	0	0	0	0	0
							DEGS1		0	0	0	0	0	0	0	0	0
							DENND2C		0	0	0	0	0	0	0	0	0
							DEPTOR		0	0	0	0	0	0	0	0	0
							DFFB		0	0	0	0	0	0	0	0	0
							DGKD		0	0	0	0	0	0	0	0	0
							DHODH		0	0	0	0	0	0	0	0	0
							DHX15		0	0	1	0	0	0	0	0	0
							DHX58		0	0	0	0	0	1	1	0	0
							DHX9		0	0	0	0	0	0	0	0	0
							DICER1		1	0	0	0	0	0	0	1	0
							DIDO1		0	0	0	0	0	0	0	0	0
							DLC1		0	0	0	0	0	0	0	0	0
							DLEU1		0	0	0	0	0	0	0	0	0
							DLG5		1	0	1	0	0	0	0	0	0
							DNAJB9		0	0	0	0	0	0	0	0	0
							DNAJC10		0	0	0	0	0	0	0	0	0
							DNAJC3	DB+inta+mi	0	0	0	0	0	0	0	0	0
							DNAJC5		1	0	0	0	0	0	0	0	0
							DNASE1L3		0	0	0	0	0	0	0	0	0
							DNASE2		0	0	0	0	0	0	0	0	0
							DNM1L		0	0	0	0	0	0	0	0	0
							DNM2	inter+mi	0	0	0	0	0	0	0	0	0
							DNMT1		0	0	0	0	0	0	0	1	0
							DOCK4		0	0	0	0	0	0	0	0	0
							DPM3		1	0	0	0	0	0	0	0	0
							DPP7		1	0	0	0	0	0	0	0	0
							DPY19L3		1	0	0	0	0	0	0	0	0
							DPYSL2		0	0	0	0	0	0	0	0	0
							DR1		1	1	0	0	0	0	0	0	0
							DRAM1		0	0	0	0	0	0	0	0	0
							DSC2		0	0	0	0	0	0	0	0	0
							DSCR3		1	0	0	0	0	0	0	0	0
							DST		0	0	0	0	0	0	0	0	0
							DSTN		0	0	0	0	0	0	0	0	0
							DTX4		0	0	0	0	0	0	0	0	0
							DUSP10		0	0	0	0	0	0	0	0	0
							DUSP2		0	0	0	0	0	0	0	0	0
							DUSP4		0	0	0	1	0	0	0	0	0
							DUSP5		0	0	0	0	0	0	0	0	0
							DUSP6		0	0	0	1	0	0	0	0	0
							DVL1		0	0	0	0	0	0	0	0	0
							DYNC1LI2		0	0	0	0	0	0	0	0	0
							DYRK1A		0	0	0	0	0	0	0	0	0
							DYRK2		0	0	0	0	0	0	0	0	0
							E2F1		0	0	0	0	0	0	0	0	0
							E2F2		0	0	0	0	0	0	0	0	0
							ECH1		0	0	0	0	0	0	0	0	0
							EDEM1		0	0	0	0	0	0	0	0	0
							EDF1		1	0	0	0	0	0	0	0	0
							EDIL3		0	0	0	0	0	0	0	0	0
							EDN1		0	0	0	0	1	0	0	0	0
							EED		0	0	0	0	0	0	0	0	0
							EEF1A1		0	0	0	0	0	0	0	1	0
							EEF1B2		0	0	0	0	0	0	0	0	0
							EEF2		0	0	0	0	0	0	0	1	0
							EFNA1		1	0	0	0	0	0	0	0	0
							EGLN3		0	0	0	0	0	0	0	0	0
							EGR1		0	0	0	1	0	0	0	0	0
							EHD1		0	0	0	0	0	0	0	0	0
							EHD2		0	0	0	0	0	0	0	0	0
							EHD4		0	0	0	0	0	0	0	0	0
							EHMT2		0	0	0	0	0	0	0	0	0
							EIF2A	DB+intra+mi	0	0	0	0	0	0	0	0	0
							EIF2S2		0	0	0	0	0	0	0	0	0
							EIF2S3		0	0	0	0	0	0	0	0	0
							EIF4A1		0	0	0	1	0	0	0	1	0
							EIF4B		0	1	0	0	0	0	0	0	0
							EIF4E		0	0	0	1	0	0	0	0	0
							EIF4E2		0	0	0	1	0	0	0	0	0
							EIF4EBP1		0	0	0	0	0	0	0	0	0
							EIF4EBP2		0	0	0	0	0	0	0	0	0
							EIF5		0	0	0	0	0	0	0	0	0
							EIF5A		0	0	0	0	0	0	0	0	0
							EIF5AL1		0	0	0	0	0	0	0	0	0
							ELF4		0	0	0	0	0	0	0	0	0
							ELK4		0	0	0	0	0	0	0	0	0
							ELL	intra+mi	0	0	0	0	0	0	0	0	0
							ELL2		0	0	0	0	0	0	0	0	0
							ELMO3		1	0	0	0	0	0	0	0	0
							ELMOD3		0	0	0	0	0	0	0	0	0
							ELOF1		0	0	0	0	0	0	0	0	0
							EMG1		0	0	0	0	0	0	0	0	0
							EMILIN2		0	0	0	0	0	0	0	0	0
							EML2		0	0	0	0	0	0	0	0	0
							EN2		0	0	0	0	0	0	0	0	0
							ENG		1	0	0	0	0	0	0	0	0
							ENO1		0	0	0	0	0	0	0	0	0
							ENO2		1	0	0	0	0	0	0	0	0
							ENTPD2		1	0	0	0	0	0	0	0	0
							ENTPD5		0	0	0	0	0	0	0	0	0
							EP400		0	0	0	0	0	0	0	0	0
							EPHA2		0	0	0	0	0	0	0	0	0
							EPHB4		0	0	0	0	0	0	0	0	0
							EPRS		0	0	0	0	0	0	0	1	0
							EPS8		0	0	0	0	0	0	0	0	0
							ERBB2		1	0	0	0	0	0	0	1	0
							ERBB3		0	0	0	0	0	0	0	0	0
							ERCC1		0	0	0	0	0	0	0	0	0
							ERCC6L		0	0	0	0	0	0	0	0	0
							EREG		0	0	0	0	1	0	0	0	0
							ERGIC2		0	0	0	0	0	0	0	0	0
							ERH		0	0	0	0	0	0	0	0	0
							ERN1		0	0	0	0	0	0	0	0	0
							ERRFI1		0	0	0	0	0	0	0	0	0
							ESPL1		0	0	0	0	0	0	0	0	0
							ETF1		0	0	0	0	0	0	0	0	0
							ETFA		1	0	0	0	0	0	0	0	0
							ETNK1		0	0	0	0	0	0	0	0	0
							ETS1		0	0	0	0	0	0	0	0	0
							EVL		0	0	0	0	0	0	0	0	0
							EXOC3L1		1	0	0	0	0	0	0	0	0
							EXOC5		0	0	0	0	0	0	0	0	0
							EXOC6B		0	0	0	0	0	0	0	0	0
							EXOC7		0	0	0	0	0	0	0	0	0
							EZR		0	0	0	0	0	0	0	0	0
							F11R		0	0	0	0	0	0	0	0	0
							F12		1	1	0	0	0	0	0	0	0
							F2		0	0	0	0	0	0	0	0	0
							F2R		0	0	0	0	0	0	0	0	0
							F2RL1		0	0	1	0	0	0	0	0	0
							FAF2		1	0	0	0	0	0	0	0	0
							FAHD1		0	0	0	0	0	0	0	0	0
							FAM129A		0	0	0	0	0	0	0	0	0
							FAM3C		0	0	0	0	0	0	0	0	0
							FAM45A		0	0	0	0	0	0	0	0	0
							FAM82A2		0	0	0	0	0	0	0	0	0
							FAM96A		0	0	0	0	0	0	0	0	0
							FASLG		0	0	0	1	0	0	0	0	0
							FASTK		1	0	0	0	0	0	0	0	0
							FASTKD5		1	0	0	0	0	0	0	0	0
							FAT1		0	0	0	0	0	0	0	0	0
							FAT2		0	0	0	0	0	0	0	0	0
							FAT3		0	0	0	0	0	0	0	0	0
							FBL		0	0	0	0	0	0	0	1	0
							FBLIM1		0	0	0	0	0	0	0	0	0
							FBLN5		1	0	0	0	0	0	0	0	0
							FBXL16	inter+mi	1	0	0	0	0	0	0	0	0
							FBXL20		1	0	0	0	0	0	0	0	0
							FBXW11		1	0	0	1	0	0	0	0	0
							FBXW2		0	0	0	0	0	0	0	0	0
							FCAR		0	0	0	0	0	0	0	0	0
							FCN3		0	0	0	0	0	0	0	0	0
							FCRL2		0	0	0	0	0	0	0	0	0
							FDFT1		0	0	0	0	0	0	0	0	0
							FDPS		1	0	0	0	0	0	0	0	0
							FDX1		0	0	0	0	0	0	0	0	0
							FEM1C		0	0	0	0	0	0	0	0	0
							FEN1		0	0	0	0	0	0	0	0	0
							FER		0	0	0	0	0	0	0	0	0
							FGF1		0	0	0	0	0	0	0	0	0
							FGF19		0	0	0	0	0	0	0	0	0
							FGF2		0	0	0	1	0	0	0	1	0
							FGF9		0	0	0	0	0	0	0	0	0
							FGFR1		0	0	0	0	0	0	0	0	0
							FGR		0	0	0	0	0	0	0	0	0
							FKBP10		0	0	0	0	0	0	0	0	0
							FKBP14		0	0	0	0	0	0	0	0	0
							FKBP1A		0	0	0	0	0	0	0	0	0
							FKBP1B		0	0	0	0	0	0	0	0	0
							FKBP1C		0	0	0	0	0	0	0	0	0
							FKBP7		0	0	0	0	0	0	0	0	0
							FKBP9		0	0	1	0	0	0	0	0	0
							FLNA		0	0	0	1	0	0	0	0	0
							FLVCR1		0	0	0	0	0	0	0	0	0
							FNBP1		0	0	0	0	0	0	0	0	0
							FNDC3B		0	0	0	0	0	0	0	0	0
							FNTA		0	0	0	0	0	0	0	0	0
							FOS		0	0	0	1	0	0	0	1	0
							FOSL2		0	0	0	0	0	0	0	0	0
							FOXA2		0	0	0	0	0	0	0	0	0
							FOXC1		0	0	0	0	0	0	0	0	0
							FOXN2		0	0	0	0	0	0	0	0	0
							FOXO3		0	0	0	1	0	0	0	1	0
							FOXQ1		0	0	0	0	0	0	0	0	0
							FPR1		0	0	0	1	1	0	1	0	0
							FPR2		0	0	0	0	0	0	0	0	0
							FRAT2		0	0	0	0	0	0	0	0	0
							FRK		0	0	0	0	0	0	0	0	0
							FRY		1	0	0	0	0	0	0	0	0
							FSTL1		0	0	0	0	0	0	0	0	0
							FTO		0	0	0	0	0	0	0	0	0
							FUS		1	0	0	0	0	0	0	0	0
							FUT1		0	0	0	0	0	0	0	0	0
							FUT4		0	0	0	0	0	0	0	0	0
							FUT7		1	0	0	0	0	0	0	0	0
							FUT8		0	0	0	0	0	0	0	0	0
							FXN		0	0	0	0	0	0	0	0	0
							FXR1		0	0	0	0	0	0	0	0	0
							G2E3		0	0	0	0	0	0	0	0	0
							G3BP1		0	0	0	0	0	0	0	0	0
							G3BP2		0	0	0	0	0	0	0	0	0
							GABARAPL2		1	0	0	0	0	0	0	0	0
							GABPA		0	0	0	0	0	0	0	0	0
							GABPB2		1	0	0	0	0	0	0	0	0
							GADD45G		1	0	0	0	0	0	0	0	0
							GANAB		0	0	0	0	0	0	0	0	0
							GAPVD1		0	0	0	0	0	0	0	0	0
							GATA6		1	0	0	0	0	0	0	0	0
							GATAD1		0	0	0	0	0	0	0	0	0
							GATM		0	0	0	0	0	0	0	0	0
							GBA		1	0	0	0	0	0	0	0	0
							GBP4		0	0	0	1	0	1	1	0	0
							GCGR		0	0	0	0	0	0	0	0	0
							GCNT1		0	0	0	0	0	0	0	0	0
							GCNT3		0	0	0	0	0	0	0	0	0
							GDF15		0	0	0	0	0	0	0	0	0
							GGA2		0	0	0	0	0	0	0	0	0
							GGCX		0	0	0	0	0	0	0	0	0
							GIMAP4		0	0	0	0	0	0	0	0	0
							GIMAP5		1	0	0	0	0	0	0	0	0
							GIPC1		0	0	0	0	0	0	0	0	0
							GIPR		0	0	0	0	0	0	0	0	0
							GJA1		0	0	0	0	0	0	0	0	0
							GLG1		0	0	0	0	0	0	0	0	0
							GLI3		0	1	0	0	0	0	0	0	0
							GLRX2		0	0	0	0	0	0	0	0	0
							GMFB		0	0	0	0	0	0	0	0	0
							GMPS		0	1	0	0	0	0	0	0	0
							GNA12		0	0	0	0	0	0	0	0	0
							GNAI3		0	0	0	0	1	0	0	0	0
							GNAQ		1	0	0	0	0	0	0	0	0
							GNE		0	0	0	0	0	0	0	0	0
							GNL1		0	0	0	0	0	0	0	0	0
							GNLY		0	0	0	0	0	0	0	0	0
							GNPTAB		1	0	0	0	0	0	0	0	0
							GNS		0	0	0	0	0	0	0	0	0
							GOLGA5		1	0	0	0	0	0	0	0	0
							GOLGA8A		0	0	0	0	0	0	0	0	0
							GP2		0	1	0	0	0	0	0	0	0
							GP5		0	0	0	0	0	0	0	0	0
							GPC4		0	0	0	0	0	0	0	0	0
							GPI		0	0	0	0	0	0	0	0	0
							GPR132	inter+mi	1	0	0	0	1	0	0	0	0
							GPR27		0	0	0	0	0	0	0	0	0
							GPR35		0	0	0	0	0	0	0	0	0
							GPSM1		0	0	0	0	0	0	0	0	0
							GPSM2		0	0	0	0	0	0	0	0	0
							GPX1		0	0	0	0	0	0	0	0	0
							GRAMD4		1	0	0	0	0	0	0	0	0
							GRB2		1	0	0	1	0	0	0	1	0
							GRIK2		0	0	1	0	0	0	0	0	0
							GRIN1		1	0	0	0	0	0	0	0	0
							GRINA	inter+mi	1	0	0	0	0	0	0	0	0
							GRK6		1	0	0	0	0	0	0	0	0
							GRSF1		0	0	0	0	0	0	0	0	0
							GSK3B	intra+mi	0	0	0	0	0	0	0	1	0
							GSR		0	0	0	0	0	0	0	0	0
							GTDC1		0	0	0	0	0	0	0	0	0
							GTF2A1		0	0	0	0	0	0	0	0	0
							GTF2H2		0	0	0	0	0	0	0	0	0
							GTPBP10		0	0	0	0	0	0	0	0	0
							GTPBP2		0	0	0	0	0	0	0	0	0
							GULP1		0	0	0	0	0	0	0	0	0
							H1F0		0	0	0	0	0	0	0	0	0
							H1FX		0	0	0	0	0	0	0	0	0
							H2AFY		0	0	0	0	0	0	0	0	0
							H3F3B		0	0	0	0	0	0	0	0	0
							HAND2		0	0	0	0	0	0	0	0	0
							HAPLN1		0	0	0	0	0	0	0	0	0
							HAPLN2		0	0	0	0	0	0	0	0	0
							HAS2		0	0	0	0	1	0	0	0	0
							HAT1		0	0	0	0	0	0	0	0	0
							HAVCR2		1	0	0	1	0	0	0	0	0
							HAX1		0	0	0	0	0	0	0	0	0
							HBP1		0	0	0	0	0	0	0	0	0
							HCFC1		0	0	0	0	0	0	0	0	0
							HCFC1R1		1	0	0	0	0	0	0	0	0
							HCG25		0	0	0	0	0	0	0	0	0
							HCRT		1	0	0	0	0	0	0	0	0
							HDAC6		0	0	0	0	0	0	0	0	0
							HDLBP		0	0	0	0	0	0	0	0	0
							HERPUD1		0	0	0	0	0	0	0	0	0
							HFE		1	0	0	0	0	0	0	0	0
							HGF		0	0	0	1	0	0	0	1	0
							HIF1AN		0	0	0	0	0	0	0	0	0
							HIGD2A	intra+mi	0	0	0	0	0	0	0	0	0
							HINT1		0	0	0	0	0	0	0	0	0
							HIPK2		0	0	0	0	0	0	0	0	0
							HIPK3		0	0	0	0	0	0	0	0	0
							HIST1H2BD		0	0	0	0	0	0	0	0	0
							HIST1H3D		0	0	0	0	0	0	0	0	0
							HIVEP1		0	0	0	0	0	0	0	0	0
							HK2		0	0	0	0	0	0	0	0	0
							HLA-B		0	0	1	1	0	0	1	0	0
							HLA-C		0	0	0	1	0	1	0	0	0
							HM13		0	0	0	0	0	0	0	0	0
							HMGA1		0	0	0	0	0	0	0	0	0
							HMGB1		1	0	0	1	0	0	0	0	0
							HMGB2		0	0	0	0	0	0	0	0	0
							HMGN2		1	1	0	0	0	0	0	0	0
							HNMT		0	0	0	0	0	0	0	0	0
							HNRNPL		0	0	0	0	0	0	0	0	0
							HOXA13		0	0	0	0	0	0	0	0	0
							HOXA5		0	0	0	0	0	0	0	0	0
							HOXA9		0	0	0	0	0	0	0	0	0
							HPRT1		0	0	0	0	0	0	0	0	0
							HPSE		0	0	0	0	0	0	0	0	0
							HRH2		0	0	0	0	0	0	0	0	0
							HRH3		0	0	0	0	0	0	0	0	0
							HRH4		0	0	0	0	0	0	0	0	0
							HS2ST1		0	0	0	0	0	0	0	0	0
							HSD11B2		0	0	0	0	0	0	0	0	0
							HSP90B1	DB+intra+mi	0	0	0	1	0	0	0	0	0
							HSPA1A		1	0	0	0	0	0	0	0	0
							HSPA1B	intra+mi	1	0	0	0	0	0	0	0	0
							HSPA1L		1	0	0	0	0	0	0	0	0
							HSPD1		0	0	0	0	0	0	0	1	0
							ICA1L		0	0	0	0	0	0	0	0	0
							ICAM2		0	0	0	0	0	0	0	0	0
							ICOSLG		0	0	0	0	1	0	0	0	0
							ID2		0	0	0	0	0	0	0	0	0
							ID3		0	0	0	0	0	0	0	0	0
							IDE		0	0	0	0	0	0	0	0	0
							IER2		0	0	0	0	0	0	0	0	0
							IER3IP1		0	0	0	0	0	0	0	0	0
							IFI6		0	0	0	1	0	0	0	0	0
							IFITM1	inter+mi	0	0	0	1	1	1	0	0	0
							IFITM2		0	0	0	1	0	1	1	0	0
							IFITM3		0	0	0	1	0	1	1	0	0
							IFITM5		0	0	0	0	0	0	0	0	0
							IFNAR1		0	0	1	1	1	0	0	0	0
							IFNB1		0	0	0	1	0	0	0	0	0
							IFNG		0	0	0	1	0	0	0	1	0
							IFNGR1		0	0	0	1	0	0	0	0	0
							IGDCC3		0	0	0	0	0	0	0	0	0
							IGF1		0	0	0	0	0	0	0	1	0
							IGF1R		0	0	0	0	0	0	0	1	0
							IGF2BP1		0	0	0	0	0	0	0	0	0
							IGF2R		1	0	0	0	0	0	0	0	0
							IGFBP1		0	0	0	0	0	0	0	0	0
							IGLC1		0	0	0	0	0	0	0	0	0
							IGLC2		0	0	0	0	0	0	0	0	0
							IGLC3		0	0	0	0	0	0	0	0	0
							IGLC4		0	0	0	0	0	0	0	0	0
							IGLC5		0	0	0	0	0	0	0	0	0
							IGLC6		0	0	0	0	0	0	0	0	0
							IGLC7		0	0	0	0	0	0	0	0	0
							IGLJ1		0	0	0	0	0	0	0	0	0
							IGLJ2		0	0	0	0	0	0	0	0	0
							IGLJ3		0	0	0	0	0	0	0	0	0
							IGLJ4		0	0	0	0	0	0	0	0	0
							IGLJ5		0	0	0	0	0	0	0	0	0
							IGLJ6		0	0	0	0	0	0	0	0	0
							IGLJ7		0	0	0	0	0	0	0	0	0
							IGLL5		0	0	0	0	0	0	0	0	0
							IGLV3-1		0	0	0	0	0	0	0	0	0
							IGLV3-2		0	0	0	0	0	0	0	0	0
							IGLV3-4		0	0	0	0	0	0	0	0	0
							IGLV4-3		0	0	0	0	0	0	0	0	0
							IGSF3		0	0	0	0	0	0	0	0	0
							IGSF6		0	0	0	0	0	0	0	0	0
							IGSF8		0	0	0	0	0	0	0	0	0
							IGSF9		0	0	0	0	0	0	0	0	0
							IKZF3		1	0	0	0	0	0	0	0	0
							IKZF4		0	0	0	0	0	0	0	0	0
							IKZF5		0	0	0	0	0	0	0	0	0
							IL12RB2		0	0	0	1	0	0	0	0	0
							IL17RA		0	0	0	1	0	0	0	0	0
							IL17RB		0	0	0	1	0	0	0	0	0
							IL17RD		0	0	0	0	0	0	0	0	0
							IL17REL		1	0	0	0	0	0	0	0	0
							IL18		0	0	0	1	1	0	0	0	0
							IL1A		0	0	0	1	1	0	0	0	0
							IL23R		0	0	0	1	0	0	0	0	0
							IL32		1	0	0	1	0	0	0	0	0
							IL4R		1	0	0	1	1	1	1	0	0
							IL6R		0	0	0	1	0	0	0	0	0
							IL6ST		0	0	0	1	0	0	0	0	0
							IL9RP3		1	0	0	0	0	0	0	0	0
							ILDR1		0	0	0	0	0	0	0	0	0
							ILF2		0	0	0	0	0	0	0	0	0
							ILF3	inter+mi	0	0	0	0	0	0	0	0	0
							ILK		0	0	0	0	0	0	0	0	0
							IMP3		1	0	0	0	0	0	0	0	0
							IMPDH2		0	0	0	0	0	0	0	0	0
							INCENP		0	0	0	0	0	0	0	0	0
							ING3		0	0	0	0	0	0	0	0	0
							INHBA		0	0	0	0	1	0	0	0	0
							INSIG1		0	0	0	0	0	0	0	0	0
							IP6K1		0	0	0	0	0	0	0	0	0
							IQSEC1		0	0	0	0	0	0	0	0	0
							IRAK1BP1		0	0	0	0	0	0	0	0	0
							IRAK3		0	0	0	1	0	0	0	0	0
							IRF1		0	1	0	1	1	1	1	0	0
							IRF4		0	0	0	1	0	0	1	0	0
							IRF9		0	0	0	1	0	1	1	0	0
							IRGQ		0	0	0	0	0	0	0	0	0
							IRS2		0	0	0	1	0	0	0	0	0
							ISG20L2	intra+mi	0	0	0	0	0	0	0	0	0
							ITCH		0	0	0	0	0	0	0	0	0
							ITGA2		1	0	0	0	0	0	0	0	0
							ITGA3		0	0	0	0	0	0	0	0	0
							ITGA5		0	0	0	0	1	0	0	0	0
							ITGAL		0	0	0	0	0	0	0	0	0
							ITGAX		0	1	0	1	0	0	0	0	0
							ITGB1		0	0	0	1	0	0	0	1	0
							ITGB3		0	0	0	0	1	0	0	1	0
							ITGB7		0	0	0	0	0	0	1	0	0
							ITGB8		0	0	0	0	1	0	0	0	0
							ITM2B		0	0	0	0	0	0	0	0	0
							ITPA		1	0	0	0	0	0	0	0	0
							ITPR1		0	0	0	0	0	0	0	0	0
							JAG1		0	0	0	0	0	0	0	0	0
							JAGN1		0	0	0	0	0	0	0	0	0
							JAM2		0	0	0	0	0	0	0	0	0
							JARID2		0	0	0	0	0	0	0	0	0
							JMJD1C		0	0	0	0	0	0	0	0	0
							JMY		0	0	0	0	0	0	0	0	0
							JRK		0	0	0	0	0	0	0	0	0
							JUND		0	0	0	0	0	0	0	0	0
							KARS		1	0	0	0	0	0	0	0	0
							KAT2A		0	0	0	0	0	0	0	0	0
							KAT2B		0	0	0	0	0	0	0	1	0
							KCNAB2		0	0	0	0	0	0	0	0	0
							KCNJ15		1	1	0	0	0	0	0	0	0
							KCTD5		0	0	0	0	0	0	0	0	0
							KHSRP		0	0	0	0	0	0	0	0	0
							KIAA0100		0	0	0	0	0	0	0	0	0
							KIAA0284		0	0	0	0	0	0	0	0	0
							KIAA1191	intra+mi	0	0	0	0	0	0	0	0	0
							KIF1B		0	0	0	0	1	0	0	0	0
							KIR3DX1		0	0	0	0	0	0	0	0	0
							KLF10		0	0	0	0	0	0	0	0	0
							KLF13		0	0	0	0	0	0	0	0	0
							KLF2		0	0	0	0	0	0	0	0	0
							KLF6		0	0	0	0	1	0	0	0	0
							KLF7		0	0	0	0	0	0	0	0	0
							KLHDC3		0	0	0	0	0	0	0	0	0
							KLHL21	inter+mi	0	0	0	0	0	0	0	0	0
							KLLN		0	0	0	0	0	0	0	0	0
							KLRC3		0	0	0	0	0	0	0	0	0
							KLRC4		0	0	0	0	0	0	0	0	0
							KLRD1		0	0	0	0	0	0	0	0	0
							KPNA1		0	1	0	1	0	0	0	0	0
							KPNA2		0	0	0	1	0	0	0	0	0
							KPNA3		0	0	0	1	0	0	0	0	0
							KPNA4		0	0	0	1	0	0	0	0	0
							KPNA6		1	0	0	0	0	0	0	0	0
							KPNB1		0	0	0	1	0	0	0	0	0
							KRAS		0	1	1	1	0	0	0	1	0
							LAIR1		0	0	0	0	0	0	0	0	0
							LAMA3		0	0	0	0	0	0	0	0	0
							LAMC3		0	0	0	0	0	0	0	0	0
							LAMP1		0	0	0	0	0	0	0	0	0
							LARP1		1	0	0	0	0	0	0	0	0
							LARS		1	1	1	0	0	0	0	0	0
							LATS2		0	0	0	0	0	0	1	0	0
							LAX1		0	0	0	0	0	0	0	0	0
							LBR		0	0	0	0	0	0	0	0	0
							LDHA		0	0	0	0	0	0	0	0	0
							LDLR		0	0	0	0	1	0	0	0	0
							LEAP2		1	1	0	0	0	0	0	0	0
							LEFTY1		0	0	0	0	0	0	0	0	0
							LFNG		0	0	0	0	0	0	0	0	0
							LGALS1		1	0	0	0	0	0	0	0	0
							LGALS8		0	0	0	0	0	0	0	0	0
							LIAS		0	0	0	0	0	0	0	0	0
							LIF		0	0	0	1	1	0	0	0	0
							LIFR		0	0	0	1	0	0	0	0	0
							LILRA2		0	0	0	0	0	0	0	0	0
							LILRA5		0	0	0	0	0	0	0	0	0
							LIMS2		0	0	0	0	0	0	0	0	0
							LIN9		0	0	0	0	0	0	0	0	0
							LINC00598		0	0	0	0	0	0	0	0	0
							LIPA		0	0	0	0	0	0	0	0	0
							LIPG		0	0	0	0	0	0	0	0	0
							LLGL1		0	0	0	0	0	0	0	0	0
							LLGL2		1	0	0	0	0	0	0	0	0
							LMAN1		0	0	0	0	0	0	0	0	0
							LMBR1L		0	0	0	0	0	0	0	0	0
							LMLN		0	0	0	0	0	0	0	0	0
							LMNB1		0	0	0	1	0	0	0	0	0
							LOXL2		0	0	0	0	0	0	0	0	0
							LRG1	intra+mi	1	0	0	0	0	0	0	0	0
							LRIG2		0	0	0	0	0	0	0	0	0
							LRP10		1	0	0	0	0	0	0	0	0
							LRP6		0	0	0	0	0	0	0	0	0
							LRPAP1		0	0	0	0	0	0	0	0	0
							LRPPRC		0	0	0	0	0	0	0	0	0
							LRRC17		0	0	0	0	0	0	0	0	0
							LRRC47		1	0	0	0	0	0	0	0	0
							LRRC8D		0	0	0	0	0	0	0	0	0
							LRRFIP1		0	0	0	0	0	0	0	0	0
							LRRN3		0	0	0	0	0	0	0	0	0
							LSG1		0	0	0	0	0	0	0	0	0
							LSM14A		0	0	0	0	0	0	0	0	0
							LSM2		1	0	0	0	0	0	0	0	0
							LSM4		0	0	0	0	0	0	0	0	0
							LUC7L2		0	0	0	0	0	0	0	0	0
							LY6E		0	0	0	0	1	1	1	0	0
							LY6G5B		0	0	0	0	0	0	0	0	0
							LY6H		0	0	0	0	0	0	0	0	0
							LY6K		0	0	0	0	0	0	0	0	0
							LYL1		0	0	0	0	0	0	0	0	0
							LYN		0	0	0	1	1	0	0	0	0
							LYRM2		0	0	0	0	0	0	0	0	0
							LYST		0	0	0	0	0	0	0	0	0
							M6PR		0	0	0	0	0	0	0	0	0
							MAD1L1		0	0	0	0	0	0	0	0	0
							MAD2L1		0	0	0	0	0	0	0	0	0
							MADD		0	0	0	0	0	0	0	0	0
							MAFB	mi+top gene	0	0	0	0	0	0	0	0	0
							MAFG		1	0	0	0	0	0	0	0	0
							MALL		0	0	0	0	0	0	0	0	0
							MALT1		0	0	0	0	0	0	0	0	0
							MAMDC4		1	0	0	0	0	0	0	0	0
							MAN2A1		0	0	0	0	0	0	0	0	0
							MAP2K1		0	0	0	1	0	0	0	1	0
							MAP2K3		1	0	0	1	0	0	0	0	0
							MAP2K4		0	0	0	1	0	0	0	0	0
							MAP3K1		0	0	0	0	0	0	0	0	0
							MAP3K10		1	0	0	0	0	0	0	0	0
							MAP3K12		0	0	0	0	0	0	0	0	0
							MAP3K2		0	0	0	0	0	0	0	0	0
							MAP3K3		1	0	0	1	0	0	0	0	0
							MAP3K5		0	0	0	0	0	0	0	0	0
							MAP3K9		0	0	0	0	0	0	0	0	0
							MAP4		0	0	0	0	0	0	0	0	0
							MAP4K2		0	0	0	0	0	0	0	0	0
							MAP4K4		0	0	0	0	0	0	0	0	0
							MAPK1		1	0	0	1	0	0	0	1	0
							MAPK14		0	0	0	1	0	0	0	1	0
							MAPK8IP2		1	0	0	0	0	0	0	0	0
							MAPK8IP3		1	0	0	0	0	0	0	0	0
							MAPKAPK5		0	0	0	0	0	0	0	0	0
							MARCH2		0	0	0	0	0	0	0	0	0
							MAT2A		0	0	0	0	0	0	0	0	0
							MAVS		0	0	0	0	0	0	0	0	0
							MAX		0	0	0	0	0	0	0	0	0
							MAZ	inter+mi	0	0	0	0	0	0	0	0	0
							MBD4		0	0	0	0	0	0	0	0	0
							MBL2		0	0	0	0	0	0	0	0	0
							MBNL1		0	0	0	0	0	0	0	0	0
							MCC		0	0	0	0	0	0	0	0	0
							MCFD2		0	0	0	0	0	0	0	0	0
							MCL1		0	0	0	1	0	0	0	0	0
							MCM3AP		0	0	0	0	0	0	0	0	0
							MCTS1		0	0	0	0	0	0	0	0	0
							MDFIC		0	0	0	0	0	0	0	0	0
							MDM2		0	0	0	0	0	0	0	1	0
							MDM4		1	0	0	0	0	0	0	0	0
							MED28		1	0	0	0	0	0	0	0	0
							MEF2D		1	0	0	0	0	0	0	0	0
							MEN1	inter+mi	0	0	0	0	0	0	0	0	0
							MET		0	0	0	0	1	0	0	0	0
							METAP1		0	0	0	0	0	0	0	0	0
							METAP2		1	1	0	0	0	0	0	0	0
							METTL14		0	0	0	0	0	0	0	0	0
							MFF		0	0	0	0	0	0	0	0	0
							MGST3		0	0	0	0	0	0	0	0	0
							MICA		0	0	0	0	0	0	0	0	0
							MICAL2		1	0	0	0	0	0	0	0	0
							MICALL2		0	0	0	0	0	0	0	0	0
							MID1IP1		0	0	0	0	0	0	0	0	0
							MIER3		0	0	0	0	0	0	0	0	0
							MIR141		1	0	0	0	0	0	0	0	0
							MIR152		0	0	0	0	0	0	0	0	0
							MIR200C		1	0	0	0	0	0	0	0	0
							MIR328		1	0	0	0	0	0	0	0	0
							MKI67		0	0	0	0	0	0	0	0	0
							MKLN1		1	0	0	0	0	0	0	0	0
							MKNK2		0	0	0	0	0	0	0	0	0
							MLF1		0	1	0	0	0	0	0	0	0
							MLH1		0	0	0	0	0	0	0	0	0
							MLLT1		0	0	0	0	0	0	0	0	0
							MLX		0	0	0	0	0	0	0	0	0
							MMP9		0	0	0	1	0	0	0	1	0
							MOAP1		0	0	0	0	0	0	0	0	0
							MPEG1		0	0	1	0	0	0	0	0	0
							MPPE1		0	0	0	0	0	0	0	0	0
							MPZL1		0	0	0	0	0	0	0	0	0
							MRFAP1L1		1	0	0	0	0	0	0	0	0
							MRPL34		0	0	0	0	0	0	0	0	0
							MRPS10		0	0	0	0	0	0	0	0	0
							MRPS12		0	0	0	0	0	0	0	0	0
							MRPS23		0	0	0	0	0	0	0	0	0
							MS4A4A		0	0	0	0	0	0	0	0	0
							MSH6		0	0	1	0	0	0	0	0	0
							MSLN		1	1	0	0	0	0	0	0	0
							MSRB2		0	0	0	0	0	0	0	0	0
							MST1R		0	0	0	0	0	0	0	0	0
							MSX1		0	0	0	0	0	0	0	0	0
							MSX2		0	0	0	0	0	0	0	0	0
							MT2A		0	0	0	1	0	0	1	0	0
							MT3		0	0	0	0	0	0	0	0	0
							MTDH		0	0	0	0	0	0	0	0	0
							MTMR12		0	0	0	0	0	0	0	0	0
							MTMR3		1	1	0	0	0	0	0	0	0
							MTOR		0	0	0	0	0	0	0	1	0
							MTPN		0	0	0	0	0	0	0	0	0
							MUC1		1	0	0	1	0	0	0	0	0
							MUC2		0	0	1	0	0	0	0	0	0
							MUC4		0	0	0	0	0	0	0	0	0
							MUC5AC		0	0	0	0	0	0	0	0	0
							MUL1		0	0	0	0	0	0	0	0	0
							MVP		0	0	0	0	0	0	1	0	0
							MYADM		0	0	0	0	0	0	0	0	0
							MYBL1		0	0	0	0	0	0	0	0	0
							MYBPC1		1	0	0	0	0	0	0	0	0
							MYH10		0	0	0	0	0	0	0	0	0
							MYH9		0	0	0	0	0	0	0	0	0
							MYLK		0	1	0	0	0	0	0	0	0
							MYO10		0	0	0	0	0	0	0	0	0
							MYO18A		0	0	0	0	0	0	0	0	0
							MYO1C		0	0	0	0	0	0	0	0	0
							MYO6		0	0	0	0	0	0	0	0	0
							NACC1	inter+mi	0	0	0	0	0	0	0	0	0
							NADSYN1		0	0	0	0	0	0	0	0	0
							NAMPT		0	0	0	0	1	0	1	0	0
							NARF		1	0	0	0	0	0	0	0	0
							NARS		0	0	1	0	0	0	0	0	0
							NAV1		0	0	0	0	0	0	0	0	0
							NCAM2		0	0	0	0	0	0	0	0	0
							NCKAP1		0	0	0	0	0	0	0	0	0
							NCKIPSD	intra+mi	0	0	0	0	0	0	0	0	0
							NCOR2		0	0	0	0	0	0	0	0	0
							NDFIP1		0	0	0	0	0	0	0	0	0
							NDST1		1	0	0	0	0	0	0	0	0
							NDST2		0	0	0	0	0	0	0	0	0
							NDUFA7		0	0	0	0	0	0	0	0	0
							NDUFS1		0	0	0	0	0	0	0	0	0
							NEGR1		0	0	0	0	0	0	0	0	0
							NEO1		0	0	0	0	0	0	0	0	0
							NEU1		0	0	0	0	0	0	0	0	0
							NF2		0	0	0	0	0	0	0	0	0
							NFASC		0	0	0	0	0	0	0	0	0
							NFATC2IP		0	0	0	0	0	0	0	0	0
							NFE2L1	inter+mi	0	0	0	0	0	0	0	0	0
							NFIB		0	0	0	0	0	0	0	0	0
							NFIC	inter+mi	0	0	0	0	0	0	0	0	0
							NIN		0	0	0	0	0	0	0	0	0
							NINJ1		0	0	0	0	0	0	0	0	0
							NISCH		0	0	0	0	0	0	0	0	0
							NKAP		0	0	0	0	0	0	0	0	0
							NKIRAS2		0	0	0	1	0	0	0	0	0
							NKRF		0	0	0	0	0	0	0	0	0
							NKTR		0	0	0	0	0	0	0	0	0
							NKX2-5		0	0	0	0	0	0	0	0	0
							NKX3-2		0	0	0	0	0	0	0	0	0
							NLGN2	intra+mi	0	0	0	0	0	0	0	0	0
							NLGN4X		0	0	0	0	0	0	0	0	0
							NLK		0	0	0	0	0	0	0	0	0
							NLRC5		0	0	0	0	0	0	1	0	0
							NLRP10		0	0	0	0	0	0	0	0	0
							NLRP6	inter+mi	0	0	0	0	0	0	0	0	0
							NLRP9		1	0	0	0	0	0	0	0	0
							NLRX1		1	0	0	0	0	0	0	0	0
							NME1-NME2		0	0	0	0	0	0	0	0	0
							NME2		0	0	0	0	0	0	0	0	0
							NME6		0	0	0	0	0	0	0	0	0
							NMT2		0	0	0	0	0	0	0	0	0
							NNT		0	0	0	0	0	0	0	0	0
							NODAL		0	0	0	0	0	0	0	0	0
							NOL11		0	0	0	0	0	0	0	0	0
							NOL3		1	0	0	0	0	0	0	0	0
							NOLC1		0	0	0	0	0	0	0	0	0
							NOS2		1	0	0	1	0	0	0	0	0
							NOS3		1	0	0	0	0	0	0	0	0
							NOTCH1		1	0	0	0	0	0	0	1	0
							NOTCH2		0	0	1	0	0	0	0	0	0
							NOX5		0	0	0	0	0	0	0	0	0
							NPHP1		0	0	0	0	0	0	0	0	0
							NPHP4		0	0	0	0	0	0	0	0	0
							NPHS1		0	0	0	0	0	0	0	0	0
							NPM1		0	1	0	0	0	0	0	1	0
							NPNT		0	0	0	0	0	0	0	0	0
							NR1H2		0	0	0	0	0	0	0	0	0
							NR2F2		0	0	0	0	0	0	0	0	0
							NR4A3		0	0	0	0	0	0	0	0	0
							NRAS		0	1	1	1	0	0	0	1	0
							NRBF2		0	0	0	0	0	0	0	0	0
							NRBP2		0	0	0	0	0	0	0	0	0
							NRGN		0	0	0	0	0	0	0	0	0
							NRP1		0	1	0	0	0	0	0	0	0
							NRXN1		0	0	0	0	0	0	0	0	0
							NRXN2		0	0	0	0	0	0	0	0	0
							NSMAF		0	0	0	0	0	0	0	0	0
							NTRK1		0	0	0	0	0	0	0	0	0
							NUAK1		0	0	0	0	0	0	0	0	0
							NUCKS1		0	0	0	0	0	0	0	0	0
							NUDC		0	0	0	0	0	0	0	0	0
							NUDT7		0	0	0	0	0	0	0	0	0
							NUP214		0	1	0	1	0	0	0	0	0
							NUP43		0	0	0	1	0	0	0	0	0
							NUP62		0	0	1	1	0	0	0	0	0
							NUS1		0	0	0	0	0	0	0	0	0
							NUTF2		0	0	0	0	0	0	0	0	0
							OGT		0	0	0	0	0	0	0	0	0
							OMD		0	0	0	0	0	0	0	0	0
							ONECUT1		0	0	0	0	0	0	0	0	0
							OPA3		0	0	0	0	0	0	0	0	0
							OPLAH		1	0	0	0	0	0	0	0	0
							OSBP		0	0	0	0	0	0	0	0	0
							OSMR		0	0	0	1	1	0	0	0	0
							OTUB1		0	0	0	0	0	0	0	0	0
							OTUB2		1	1	0	0	0	0	0	0	0
							OTUD1		0	0	0	0	0	0	0	0	0
							OTUD4		0	0	0	0	0	0	0	0	0
							OXSR1		0	0	0	0	0	0	0	0	0
							P2RX7		1	0	0	0	1	0	0	0	0
							P2RY10		0	0	0	0	0	0	0	0	0
							PA2G4		0	0	0	0	0	0	0	0	0
							PABPC1		1	1	0	0	0	0	0	1	0
							PACS1		0	0	1	0	0	0	0	0	0
							PAFAH1B2		0	0	0	0	0	0	0	0	0
							PAG1		0	0	0	0	0	0	0	0	0
							PAICS		0	0	0	0	0	0	0	0	0
							PAIP1		0	0	0	0	0	0	0	0	0
							PANK3		0	0	0	0	0	0	0	0	0
							PANX1		0	0	0	0	0	0	0	0	0
							PARL		0	0	0	0	0	0	0	0	0
							PARP1		0	0	0	0	0	0	0	1	0
							PAWR		0	0	0	0	0	0	0	0	0
							PAX5		0	0	0	0	0	0	0	0	0
							PBX2P1		0	0	0	0	0	0	0	0	0
							PBX3		0	0	0	0	0	0	0	0	0
							PBXIP1		0	0	0	0	0	0	0	0	0
							PCBD2		0	0	0	0	0	0	0	0	0
							PCDH7		0	0	1	0	1	0	0	0	0
							PCDHA1		0	0	0	0	0	0	0	0	0
							PCDHA10		0	0	0	0	0	0	0	0	0
							PCDHA11		0	0	0	0	0	0	0	0	0
							PCDHA12		0	0	0	0	0	0	0	0	0
							PCDHA13		0	0	0	0	0	0	0	0	0
							PCDHA2		0	0	0	0	0	0	0	0	0
							PCDHA3		0	0	0	0	0	0	0	0	0
							PCDHA4		0	0	0	0	0	0	0	0	0
							PCDHA5		0	0	0	0	0	0	0	0	0
							PCDHA6		0	0	1	0	0	0	0	0	0
							PCDHA7		0	0	0	0	0	0	0	0	0
							PCDHA8		0	0	0	0	0	0	0	0	0
							PCDHAC1		0	0	0	0	0	0	0	0	0
							PCDHAC2		0	0	0	0	0	0	0	0	0
							PCDHB11		0	0	0	0	0	0	0	0	0
							PCDHB6		0	0	0	0	0	0	0	0	0
							PCDHB8		0	0	0	0	0	0	0	0	0
							PCMTD2		1	0	0	0	0	0	0	0	0
							PCNA		0	0	0	0	0	0	0	0	0
							PCNP		0	0	0	0	0	0	0	0	0
							PDCD10		0	0	0	0	0	0	0	0	0
							PDCD4		0	0	0	1	0	0	0	0	0
							PDDC1		1	0	0	0	0	0	0	0	0
							PDE12		0	0	0	1	0	0	0	0	0
							PDE3A		0	0	0	0	0	0	0	0	0
							PDE4B		0	1	0	0	1	0	1	0	0
							PDE4DIP		0	0	0	0	0	0	0	0	0
							PDE5A		0	1	0	0	0	0	0	0	0
							PDGFRA		1	1	0	0	0	0	0	0	0
							PDGFRL		0	0	0	0	0	0	0	0	0
							PDHX		0	0	0	0	0	0	0	0	0
							PDIA6		0	0	0	0	0	0	0	0	0
							PDK3		0	0	0	0	0	0	0	0	0
							PDLIM7		1	0	0	0	0	0	0	0	0
							PEAR1		0	1	1	0	0	0	0	0	0
							PEBP1		0	0	1	0	0	0	0	0	0
							PEG10		0	0	0	0	0	0	0	0	0
							PELO		0	0	0	0	0	0	0	0	0
							PEX26		0	0	0	0	0	0	0	0	0
							PF4		0	0	0	0	0	0	0	0	0
							PFDN5		0	0	0	0	0	0	0	0	0
							PFKFB2		0	0	0	0	0	0	0	0	0
							PGAM1		0	0	0	0	0	0	0	0	0
							PGD		0	0	0	0	0	0	0	0	0
							PGK1		0	0	0	0	0	0	0	0	0
							PGR		0	0	0	0	0	0	0	0	0
							PHB		0	0	0	0	0	0	0	0	0
							PHB2	DB+intra+mi	1	0	0	0	0	0	0	0	0
							PHKA1		0	0	0	0	0	0	0	0	0
							PHLDA1		0	0	0	0	0	0	0	0	0
							PHLDA2		0	0	0	0	0	0	0	0	0
							PHLDA3		0	0	0	0	0	0	0	0	0
							PHLPP2		0	0	0	0	0	0	0	0	0
							PHPT1	inter+mi	1	0	0	0	0	0	0	0	0
							PHTF1		0	0	0	0	0	0	0	0	0
							PHTF2		0	0	0	0	0	0	0	0	0
							PI4KB		0	0	0	0	0	0	0	0	0
							PIAS2		0	0	0	0	0	0	0	0	0
							PICK1		0	0	0	0	0	0	0	0	0
							PIDD		1	0	0	0	0	0	0	0	0
							PIGA		0	0	0	0	0	0	0	0	0
							PIGR		0	0	0	0	0	0	0	0	0
							PIGT		0	0	0	0	0	0	0	0	0
							PIK3C2A		0	0	0	0	0	0	0	0	0
							PIK3CD		0	0	0	1	0	0	0	0	0
							PIK3CG		0	0	0	0	0	0	0	0	0
							PIK3R1		0	0	0	1	0	0	0	1	0
							PIK3R4		0	0	0	0	0	0	0	0	0
							PIKFYVE		0	0	0	0	0	0	0	0	0
							PIM1		0	0	0	1	0	0	1	0	0
							PITPNC1		0	0	0	0	0	0	0	0	0
							PKD1		0	0	0	0	0	0	0	0	0
							PKHD1		0	1	1	0	0	0	0	0	0
							PKLR		1	0	0	0	0	0	0	0	0
							PKN2		0	0	0	0	0	0	0	0	0
							PKNOX1		0	0	0	0	0	0	0	0	0
							PLA2G4C		0	1	0	0	0	0	0	0	0
							PLAA		0	0	0	0	0	0	0	0	0
							PLAC8		0	0	0	0	0	0	0	0	0
							PLAGL2		0	0	0	0	0	0	0	0	0
							PLAT		0	0	0	0	0	0	0	0	0
							PLCG2		0	1	0	0	0	0	0	0	0
							PLEC	inter+mi	1	0	1	0	0	0	0	0	0
							PLEKHA1		0	0	0	0	0	0	0	0	0
							PLSCR1		0	0	0	0	0	1	1	0	0
							PLSCR3		0	0	0	0	0	0	0	0	0
							PLXNA2		1	1	1	0	0	0	0	0	0
							PLXNA3		0	0	0	0	0	0	0	0	0
							PMAIP1		0	0	0	0	0	0	0	0	0
							PML		0	1	0	1	0	0	1	0	0
							PNN		0	0	0	0	0	0	0	0	0
							PNP		1	0	0	0	0	0	1	0	0
							PNRC1		0	0	0	0	0	0	0	0	0
							PNRC2		0	0	0	0	0	0	0	0	0
							POC1A		0	0	0	0	0	0	0	0	0
							POC5		0	0	0	0	0	0	0	0	0
							POGK		0	0	0	0	0	0	0	0	0
							POLE3		0	0	0	0	0	0	0	0	0
							POLR1B		0	0	0	0	0	0	0	0	0
							POLR1D		1	1	0	0	0	0	0	0	0
							POLR2E		1	0	0	0	0	0	0	0	0
							POLR2F	inter+mi	0	0	0	0	0	0	0	0	0
							POLR2L		1	0	0	0	0	0	0	0	0
							POLR3A		1	1	0	0	0	0	0	0	0
							POLR3E		0	0	0	0	0	0	0	0	0
							POLR3G		0	0	0	0	0	0	0	0	0
							POLR3K		1	0	0	0	0	0	0	0	0
							POU2F1		0	0	0	1	0	0	0	0	0
							PPARA		0	0	0	0	0	0	0	0	0
							PPARG		0	1	0	0	0	0	0	1	0
							PPARGC1A		0	0	0	0	0	0	0	0	0
							PPARGC1B		0	0	0	0	0	0	0	0	0
							PPFIBP1		0	0	0	0	0	0	0	0	0
							PPIA		0	0	0	1	0	0	0	0	0
							PPIC		0	0	0	0	0	0	0	0	0
							PPIG		0	0	0	0	0	0	0	0	0
							PPIL4		0	0	0	0	0	0	0	0	0
							PPP1CB		0	0	0	0	0	0	0	0	0
							PPP1CC		0	0	0	0	0	0	0	0	0
							PPP1R8		0	0	0	0	0	0	0	0	0
							PPP2R5D		0	0	0	1	0	0	0	0	0
							PPP2R5E		0	0	0	0	0	0	0	0	0
							PPP3CA		0	0	0	0	0	0	0	0	0
							PPP3CB		0	0	0	0	0	0	0	0	0
							PPP3R1		0	0	0	0	0	0	0	0	0
							PPP5C		0	0	0	0	0	0	0	0	0
							PPTC7		0	0	0	0	0	0	0	0	0
							PRDX3		1	0	0	0	0	0	0	0	0
							PRELID1		1	0	0	0	0	0	0	0	0
							PRKAA1		0	0	0	0	0	0	0	0	0
							PRKAA2		0	0	0	0	0	0	0	0	0
							PRKAB2		0	0	0	0	0	0	0	0	0
							PRKAR1A		0	0	0	0	0	0	0	0	0
							PRKCD		0	0	0	1	0	0	0	0	0
							PRKCH		0	0	0	0	0	0	0	0	0
							PRKCZ		0	1	1	0	0	0	0	0	0
							PRKD2		0	0	0	0	0	0	0	0	0
							PRKRIR		0	0	0	0	0	0	0	0	0
							PRKX		0	0	0	0	0	0	0	0	0
							PRLR		0	0	0	1	0	0	0	0	0
							PRMT1		0	0	0	0	0	0	0	0	0
							PRNP		0	0	0	0	0	0	0	0	0
							PROX1		0	0	0	0	0	0	0	0	0
							PRPF8		0	0	0	0	0	0	0	0	0
							PRPS1		0	0	0	0	0	0	0	0	0
							PRR11		0	0	0	0	0	0	0	0	0
							PRR13		0	0	0	0	0	0	0	0	0
							PRRC2A		1	0	0	0	0	0	0	0	0
							PRRC2B	intra+mi	0	0	0	0	0	0	0	0	0
							PRRC2C		0	0	0	0	0	0	0	0	0
							PRSS16		0	0	0	0	0	0	0	0	0
							PRUNE2		0	0	0	0	0	0	0	0	0
							PSD4		0	0	0	0	0	0	0	0	0
							PSMA2		0	0	0	1	0	0	1	0	0
							PSMA3		0	0	0	1	0	1	1	1	0
							PSMB4	intra+mi	0	0	0	1	0	0	0	0	0
							PSMB5		1	0	0	1	0	0	0	0	0
							PSMC1		1	0	0	1	0	0	0	0	0
							PSMC3		0	0	0	1	0	0	0	0	0
							PSMD13		0	0	0	1	0	0	0	0	0
							PSMD3		0	0	0	1	0	0	0	0	0
							PSMD4		0	0	0	1	0	0	0	0	0
							PSME1		0	0	0	1	0	1	1	0	0
							PSME2		0	0	0	1	0	1	1	0	0
							PSMG4		0	0	0	0	0	0	0	0	0
							PSTPIP2		0	0	0	0	0	0	0	0	0
							PTAR1		0	0	0	0	0	0	0	0	0
							PTBP1		1	0	0	0	0	0	0	0	0
							PTGES2		0	0	0	0	0	0	0	0	0
							PTGFRN		0	0	0	0	0	0	0	0	0
							PTGIR		0	0	0	0	1	0	0	0	0
							PTGR2		0	0	0	0	0	0	0	0	0
							PTGS2		0	0	0	1	0	0	1	1	0
							PTMA		0	0	0	0	0	0	0	0	0
							PTP4A1		0	0	0	0	0	0	0	0	0
							PTP4A2		0	0	0	0	0	0	0	0	0
							PTPN1		0	0	0	1	0	0	1	0	0
							PTPN11		0	0	1	1	0	0	0	1	0
							PTPN13		0	0	0	1	0	0	0	0	0
							PTPN22		0	0	0	0	0	0	0	0	0
							PTPN4		0	0	0	1	0	0	0	0	0
							PTPN6		1	0	0	1	0	0	1	0	0
							PTPRF		0	0	0	0	0	0	0	0	0
							PTRH2		1	0	0	0	0	0	0	0	0
							PUF60		0	0	0	0	0	0	0	0	0
							PUM1		0	0	0	0	0	0	0	0	0
							PURA		0	0	0	0	0	0	0	0	0
							PURB		0	0	0	0	0	0	0	0	0
							PWP2		0	0	0	0	0	0	0	0	0
							PXK		0	0	0	0	0	0	0	0	0
							QKI		0	0	0	0	0	0	0	0	0
							QSER1		0	0	0	0	0	0	0	0	0
							RAB11FIP1		0	0	0	0	0	0	0	0	0
							RAB11FIP4		0	1	0	0	0	0	0	0	0
							RAB18		1	0	0	0	0	0	0	0	0
							RAB22A		0	0	0	0	0	0	0	0	0
							RAB32		0	0	0	0	0	0	0	0	0
							RAB34		0	0	0	0	0	0	0	0	0
							RAB3D		1	0	0	0	0	0	0	0	0
							RAB40C		1	0	0	0	0	0	0	0	0
							RAB4A		0	0	0	0	0	0	0	0	0
							RAB5A		0	0	0	0	0	0	0	0	0
							RAB5B		0	0	0	0	0	0	0	0	0
							RAB5C		1	0	0	0	0	0	0	0	0
							RAB8B		0	0	0	0	0	0	0	0	0
							RABEP2		0	0	0	0	0	0	0	0	0
							RABGAP1L		0	0	0	0	0	0	0	0	0
							RABGEF1		0	1	0	0	0	0	0	0	0
							RAC1		0	0	0	0	0	0	0	1	0
							RACGAP1		0	0	0	0	0	0	0	0	0
							RAG1		0	0	0	1	0	0	0	0	0
							RALA		0	0	0	1	0	0	0	0	0
							RAN		0	0	0	0	0	0	0	1	0
							RANBP2		0	0	0	1	0	0	0	0	0
							RANBP6		0	0	0	0	0	0	0	0	0
							RAP1B		0	0	0	1	0	0	0	0	0
							RAP2B		0	0	0	0	0	0	0	0	0
							RAPGEF1	intra+mi	1	0	0	1	0	0	0	0	0
							RARG		0	0	0	0	0	0	0	0	0
							RASA1		0	0	0	0	0	0	0	0	0
							RASGRP2		0	0	0	0	0	0	0	0	0
							RASSF1		0	0	0	0	0	0	0	0	0
							RASSF6		0	0	0	0	0	0	0	0	0
							RB1		0	0	0	0	0	0	0	0	0
							RBBP4		0	0	0	0	0	0	0	0	0
							RBM25		0	0	0	0	0	0	0	0	0
							RBM3		0	0	1	0	0	0	0	0	0
							RBM33		0	0	0	0	0	0	0	0	0
							RBM7		0	0	0	0	0	0	0	0	0
							RBMX		0	0	0	0	0	0	0	0	0
							RBPJ		0	0	0	0	0	0	0	0	0
							RCAN1		0	0	0	0	0	0	0	0	0
							RCOR1		0	0	0	0	0	0	0	0	0
							RDH10		0	0	0	0	0	0	0	0	0
							RDH11		0	0	0	0	0	0	0	0	0
							REL		0	0	0	0	0	0	0	0	0
							REPIN1		0	0	0	0	0	0	0	0	0
							REPS1		0	0	0	0	0	0	0	0	0
							REST		0	0	0	0	0	0	0	0	0
							REV3L		0	0	1	0	0	0	0	0	0
							RFX1		0	0	0	0	0	0	0	0	0
							RFX5		0	0	0	0	0	0	0	0	0
							RFXAP		0	0	0	0	0	0	0	0	0
							RHBDD3		0	0	0	0	0	0	0	0	0
							RHBDF2		0	0	0	0	0	0	0	0	0
							RHCG		1	1	0	0	0	0	0	0	0
							RHOA	inter+mi	1	0	0	0	0	0	0	1	0
							RHOB		0	0	0	0	0	0	0	0	0
							RHOF		0	0	0	0	0	0	0	0	0
							RHOG		0	0	0	0	1	0	0	0	0
							RHOT2		1	0	0	0	0	0	0	0	0
							RIC8A		0	0	0	0	0	0	0	0	0
							RIF1		0	0	0	0	0	0	0	0	0
							RIMS4		0	0	0	0	0	0	0	0	0
							RIN3		1	1	0	0	0	0	0	0	0
							RNF11		0	0	0	0	0	0	0	0	0
							RNF125		0	0	0	0	0	0	0	0	0
							RNF149		0	0	0	0	0	0	0	0	0
							RNF187		1	1	0	0	0	0	0	0	0
							RNF216		0	0	0	0	0	0	0	0	0
							RNF24		0	0	0	0	0	0	0	0	0
							RNF31		0	0	0	0	0	1	1	0	0
							RNF34		0	0	0	0	0	0	0	0	0
							RNF4		0	0	0	0	0	0	0	0	0
							RNF41		0	0	0	0	0	0	0	0	0
							RNMT		0	0	0	0	0	0	0	0	0
							RNPS1		1	1	0	0	0	0	0	0	0
							ROBO1		0	1	0	0	0	0	0	0	0
							ROPN1L		0	0	0	0	0	0	0	0	0
							RPH3AL		0	0	0	0	0	0	0	0	0
							RPL13		0	0	0	0	0	0	0	0	0
							RPL13A		0	0	0	0	0	0	0	0	0
							RPL14		0	0	0	0	0	0	0	0	0
							RPL18		0	0	0	0	0	0	0	0	0
							RPL18A		0	0	0	0	0	0	0	0	0
							RPL19		1	0	0	0	0	0	0	0	0
							RPL23		0	0	0	0	0	0	0	0	0
							RPL24		0	0	0	0	0	0	0	0	0
							RPL26		0	0	0	0	0	0	0	0	0
							RPL28		0	0	0	0	0	0	0	0	0
							RPL37		0	0	0	0	0	0	0	0	0
							RPL4		0	0	0	0	0	0	0	1	0
							RPL41		0	0	0	0	0	0	0	0	0
							RPL7A	DB+intra+mi	0	0	0	0	0	0	0	0	0
							RPL7L1		0	0	0	0	0	0	0	0	0
							RPL9		0	0	0	0	0	0	0	1	0
							RPLP2		1	0	0	0	0	0	0	0	0
							RPS12		0	0	0	0	0	0	0	0	0
							RPS14		1	0	0	0	0	0	0	0	0
							RPS15A		0	0	0	0	0	0	0	0	0
							RPS18		0	0	0	0	0	0	0	0	0
							RPS2		1	0	0	0	0	0	0	1	0
							RPS23		0	0	0	0	0	0	0	0	0
							RPS24		1	1	0	0	0	0	0	0	0
							RPS28		0	0	0	0	0	0	0	0	0
							RPS3A		0	0	0	0	0	0	0	1	0
							RPS6		0	0	0	0	0	0	0	1	0
							RPS6KA3		0	0	0	1	0	0	0	0	0
							RPS6KA5		0	0	0	1	0	0	0	0	0
							RPS7		0	0	0	0	0	0	0	0	0
							RPS8		0	0	0	0	0	0	0	0	0
							RPSA		0	0	0	0	0	0	0	1	0
							RRAD		0	0	0	0	0	0	0	0	0
							RRAGC		0	0	0	0	0	0	0	0	0
							RRAGD		0	0	0	0	0	0	0	0	0
							RREB1		0	0	0	0	0	0	0	0	0
							RRN3		0	0	0	0	0	0	0	0	0
							RSBN1		0	0	0	0	0	0	0	0	0
							RSF1		0	0	0	0	0	0	0	0	0
							RSL1D1		0	0	0	0	0	0	0	0	0
							RTN2		0	0	0	0	0	0	0	0	0
							RTN3		1	0	0	0	0	0	0	0	0
							RUFY3		0	0	0	0	0	0	0	0	0
							RUNX1		0	1	1	0	0	0	0	0	0
							RUNX3		0	0	0	0	0	0	0	0	0
							RUSC1		1	0	0	0	0	0	0	0	0
							RYBP		0	0	0	0	0	0	0	0	0
							RYR2		0	0	0	0	0	0	0	0	0
							S100P		1	1	0	0	0	0	0	0	0
							S1PR3		0	0	0	0	0	0	0	0	0
							SACS		0	0	0	0	0	0	0	0	0
							SAMHD1		0	0	0	1	0	0	1	0	0
							SAMSN1		0	0	0	0	0	0	0	0	0
							SAR1A		0	0	0	0	0	0	0	0	0
							SARS		0	0	0	0	0	0	0	0	0
							SART3		0	0	0	0	0	0	0	0	0
							SBNO2		1	0	0	0	0	0	0	0	0
							SCAMP2		1	0	0	0	0	0	0	0	0
							SCAMP3		1	0	0	0	0	0	0	0	0
							SCAP		0	0	0	0	0	0	0	0	0
							SCARB2		0	0	0	0	0	0	0	0	0
							SCD5		0	1	0	0	0	0	0	0	0
							SCOC		0	0	0	0	0	0	0	0	0
							SCRIB		1	0	0	0	0	0	0	0	0
							SCRN1		0	0	0	0	0	0	0	0	0
							SCUBE1		0	0	0	0	0	0	0	0	0
							SCUBE3		0	0	0	0	0	0	0	0	0
							SCYL3		0	0	0	0	0	0	0	0	0
							SDAD1		1	0	0	0	0	0	0	0	0
							SDC4		0	0	0	0	0	0	0	0	0
							SDCBP		0	0	0	0	0	0	0	0	0
							SDF4		1	0	0	0	0	0	0	0	0
							SDK1		0	0	0	0	0	0	0	0	0
							SEC23B		0	0	0	0	0	0	0	0	0
							SEC23IP		0	0	0	0	0	0	0	0	0
							SEC31A		0	0	0	0	0	0	0	0	0
							SEH1L		0	0	0	1	0	0	0	0	0
							SELPLG		0	0	0	0	0	0	0	0	0
							SEMA3G		0	0	0	0	0	0	0	0	0
							SEMA4C		0	0	0	0	0	0	0	0	0
							SEMA4D		1	0	0	0	1	0	0	0	0
							SEMA6B		1	0	0	0	0	0	0	0	0
							SEPT2		0	0	0	0	0	0	0	0	0
							SERBP1		0	0	0	0	0	0	0	0	0
							SERINC3		0	0	0	0	0	0	0	0	0
							SERTAD3		0	0	0	0	0	0	0	0	0
							SET		1	0	0	0	0	0	0	0	0
							SF3A1	inter+mi	1	0	0	0	0	0	0	0	0
							SFN		0	0	0	0	0	0	0	0	0
							SFPQ		0	0	0	0	0	0	0	0	0
							SFTPA1		0	0	0	0	0	0	0	0	0
							SFTPB		0	1	0	0	0	0	0	0	0
							SFXN1		0	0	0	0	0	0	0	0	0
							SGK3		0	0	0	0	0	0	0	0	0
							SH2B3		0	0	0	1	0	0	0	0	0
							SH2D1A		0	0	0	0	0	0	0	0	0
							SH2D2A		0	0	0	0	0	0	0	0	0
							SH3BGRL		0	0	0	0	0	0	0	0	0
							SHC1		0	0	0	1	0	0	0	1	0
							SHH		0	0	0	0	0	0	0	1	0
							SHISA5		1	0	0	0	0	0	0	0	0
							SHMT1		0	0	0	0	0	0	0	0	0
							SIAH2		0	0	0	0	0	0	0	0	0
							SIGLEC10		0	0	0	0	0	0	0	0	0
							SIGLEC12		0	0	0	0	0	0	0	0	0
							SIGLEC5		0	0	0	0	0	0	0	0	0
							SIGLEC6		0	0	0	0	0	0	0	0	0
							SIGLEC7		0	0	0	0	0	0	0	0	0
							SIGLEC8	intra+mi	0	0	0	0	0	0	0	0	0
							SIGLEC9	intra+mi	0	0	0	0	0	0	0	0	0
							SIK1		0	0	0	0	0	0	0	0	0
							SIK2		0	0	0	0	0	0	0	0	0
							SIPA1		1	0	0	0	0	0	0	0	0
							SIPA1L1		0	0	0	0	0	0	0	0	0
							SIRT1		0	0	0	0	0	0	0	1	0
							SIT1		1	0	0	0	0	0	0	0	0
							SIX4		0	0	0	0	0	0	0	0	0
							SKI		1	0	0	0	0	0	0	0	0
							SKIL		0	0	0	0	0	0	0	0	0
							SKIV2L		0	0	0	0	0	0	0	0	0
							SLAMF1		0	0	0	0	1	0	0	0	0
							SLC10A3		0	0	0	0	0	0	0	0	0
							SLC11A2		0	0	0	0	1	0	0	0	0
							SLC15A2		0	0	0	0	0	0	0	0	0
							SLC1A2		0	0	0	0	1	0	0	0	0
							SLC25A30		0	0	0	0	0	0	0	0	0
							SLC25A32		0	0	0	0	0	0	0	0	0
							SLC25A37		0	0	0	0	0	0	0	0	0
							SLC25A5		0	0	0	0	0	0	0	0	0
							SLC26A6		0	0	0	0	0	0	0	0	0
							SLC2A11		1	0	0	0	0	0	0	0	0
							SLC2A4		0	0	0	0	0	0	0	0	0
							SLC30A5		0	0	1	0	0	0	0	0	0
							SLC33A1		0	0	0	0	0	0	0	0	0
							SLC35A3		0	0	0	0	0	0	0	0	0
							SLC35E2		1	0	0	0	0	0	0	0	0
							SLC37A3		0	0	0	0	0	0	0	0	0
							SLC4A1		0	0	0	0	0	0	0	0	0
							SLC4A7		0	0	0	0	0	0	0	0	0
							SLC50A1		1	0	0	0	0	0	0	0	0
							SLC7A5		0	0	0	0	0	0	0	0	0
							SLC7A6		0	0	0	0	0	0	0	0	0
							SLCO2A1		0	0	0	0	0	0	0	0	0
							SLFN12L		0	0	0	0	0	0	0	0	0
							SLFN13		0	0	0	0	0	0	0	0	0
							SLMO2		0	0	0	0	0	0	0	0	0
							SLURP1		0	0	0	0	0	0	0	0	0
							SLX4		0	0	0	0	0	0	0	0	0
							SMAD1		0	0	0	0	0	0	0	0	0
							SMAD2		0	0	0	0	0	0	0	1	0
							SMAD4		0	0	0	0	0	0	0	1	0
							SMAD5		0	0	0	0	0	0	0	0	0
							SMAD7		0	0	0	0	0	0	0	0	0
							SMAGP		0	0	0	0	0	0	0	0	0
							SMAP2		0	0	0	0	0	0	0	0	0
							SMARCA5		0	0	0	0	0	0	0	0	0
							SMARCE1		0	0	0	0	0	0	0	0	0
							SMC1A		0	0	1	0	0	0	0	0	0
							SMC5		1	0	1	0	0	0	0	0	0
							SMNDC1		0	0	0	0	0	0	0	0	0
							SMOC1		0	0	0	0	0	0	0	0	0
							SMURF2		1	0	0	0	0	0	0	0	0
							SNAP23		0	0	0	0	0	0	0	0	0
							SNAP25		0	0	0	1	0	0	0	0	0
							SNAPIN		0	0	0	0	0	0	0	0	0
							SNCB	intra+mi	0	0	0	0	0	0	0	0	0
							SNPH		0	0	0	0	0	0	0	0	0
							SNRPD1		0	0	0	0	0	0	0	0	0
							SNRPD2		0	0	0	0	0	0	0	0	0
							SNRPD3		0	0	0	0	0	0	0	0	0
							SNTB1		0	0	0	0	0	0	0	0	0
							SNTB2		0	0	0	0	0	0	0	0	0
							SNX1		0	0	0	0	0	0	0	0	0
							SNX2		0	0	0	0	0	0	0	0	0
							SNX4		0	0	0	0	0	0	0	0	0
							SNX5		0	0	0	0	0	0	0	0	0
							SOAT1		0	0	0	0	0	0	0	0	0
							SOD1		0	0	0	1	0	0	0	0	0
							SOD2		0	0	0	1	0	0	1	0	0
							SORT1		0	0	0	0	0	0	0	0	0
							SOX4		0	0	0	0	0	0	0	0	0
							SP1		0	0	0	0	0	0	0	0	0
							SP110		0	0	0	0	0	1	1	0	0
							SP2		0	0	1	0	0	0	0	0	0
							SPA17		0	0	0	0	0	0	0	0	0
							SPACA3		0	0	0	0	0	0	0	0	0
							SPAG9		0	0	0	0	0	0	0	0	0
							SPARC		0	0	0	0	0	0	0	0	0
							SPHAR		0	0	0	0	0	0	0	0	0
							SPHK1		0	0	0	0	1	0	0	0	0
							SPIB		0	0	0	0	0	0	0	0	0
							SPP1		0	0	0	0	0	0	0	0	0
							SPPL3		1	0	0	0	0	0	0	0	0
							SPTBN2		0	0	0	0	0	0	0	0	0
							SRD5A1		0	0	0	0	0	0	0	0	0
							SREBF1		0	0	0	0	0	0	0	0	0
							SRFBP1		0	0	0	0	0	0	0	0	0
							SRGN		1	0	0	0	0	0	0	0	0
							SRP68		0	0	0	0	0	0	0	0	0
							SRPK1		0	0	0	0	0	0	0	0	0
							SRPK2		0	0	0	0	0	0	0	0	0
							SRR		0	0	0	0	0	0	0	0	0
							SSBP2		0	0	0	0	0	0	0	0	0
							SSBP4		0	0	0	0	0	0	0	0	0
							SSPN		0	0	0	0	0	0	0	0	0
							SSR3		0	0	0	0	0	0	0	0	0
							SSRP1		0	0	0	0	0	0	0	0	0
							SSX2IP		0	0	0	0	0	0	0	0	0
							ST8SIA4		0	0	0	0	0	0	1	0	0
							STAB1		0	1	0	0	1	0	0	0	0
							STAP1		0	0	0	0	0	0	0	0	0
							STARD7		0	0	0	0	0	0	0	0	0
							STAT1		0	0	0	1	0	0	1	1	0
							STAT2		0	0	1	1	0	1	1	0	0
							STAT5B		1	1	0	1	0	0	0	1	0
							STEAP2		0	0	0	0	0	0	0	0	0
							STEAP4		0	0	0	0	0	0	0	0	0
							STK25		0	0	0	0	0	0	0	0	0
							STK38L		0	0	0	0	0	0	0	0	0
							STK4		0	0	0	0	0	0	0	0	0
							STON2		1	0	0	0	0	0	0	0	0
							STRN4		0	0	1	0	0	0	0	0	0
							STUB1		1	0	0	0	0	0	0	0	0
							STX10		0	0	0	0	0	0	0	0	0
							STX2		0	0	0	0	0	0	0	0	0
							STXBP1		0	0	0	0	0	0	0	0	0
							STXBP3		0	0	0	0	0	0	0	0	0
							SUGT1		0	0	0	0	0	0	0	0	0
							SUPT16H		0	0	0	0	0	0	0	0	0
							SUPT7L		0	0	0	0	0	0	0	0	0
							SURF1		0	0	0	0	0	0	0	0	0
							SURF4		0	0	0	0	0	0	0	0	0
							SUZ12		0	0	0	0	0	0	0	0	0
							SWAP70		0	0	0	0	0	0	0	0	0
							SYK		0	0	0	1	0	0	0	0	0
							SYNCRIP		0	0	0	0	0	0	0	0	0
							SYNJ1		0	0	0	0	0	0	0	0	0
							SYT7		0	0	0	0	0	0	0	0	0
							SYTL1		0	0	0	0	0	0	0	0	0
							SYVN1		0	0	0	0	0	0	0	0	0
							TAB1		0	0	0	1	0	0	0	0	0
							TAB2		0	0	0	1	0	0	0	0	0
							TAB3		0	0	0	1	0	0	0	0	0
							TAC1		0	0	0	0	0	0	0	0	0
							TAF8		0	0	0	0	0	0	0	0	0
							TALDO1	inter+mi	1	0	0	1	0	0	0	0	0
							TANK		0	0	0	0	0	0	0	0	0
							TAPBP	inter+mi	0	0	0	0	1	0	1	0	0
							TBC1D15		0	0	0	0	0	0	0	0	0
							TBC1D8		0	0	0	0	0	0	0	0	0
							TBL1XR1		0	0	0	0	0	0	0	0	0
							TBX1		0	0	0	0	0	0	0	0	0
							TCF21		0	0	0	0	0	0	0	0	0
							TCF4		0	0	0	0	0	0	0	0	0
							TCF7L2		0	0	0	0	0	0	0	0	0
							TCL1A		0	0	0	0	0	0	0	0	0
							TCL1B		0	0	0	0	0	0	0	0	0
							TCP1		0	0	0	1	0	0	0	0	0
							TDG	intra+mi	0	0	0	0	0	0	0	0	0
							TDGF1P3		0	0	0	0	0	0	0	0	0
							TERT		0	1	0	0	0	0	0	0	0
							TES		0	0	0	0	0	0	0	0	0
							TFAM		0	0	0	0	0	0	0	0	0
							TFDP2		0	0	0	0	0	0	0	0	0
							TFPI		0	0	0	0	0	0	0	0	0
							TFRC	inter+mi	0	0	0	0	0	0	0	0	0
							TGFA		1	0	0	0	0	0	0	0	0
							TGFB1		0	0	0	1	0	0	0	1	0
							TGFB2		0	0	0	0	0	0	0	0	0
							TGFBR1		0	0	0	0	0	0	0	0	0
							TGFBR2		0	0	0	0	0	0	0	0	0
							TGFBR3		0	0	0	0	0	0	0	0	0
							TGFBRAP1		0	0	0	0	0	0	0	0	0
							TGIF2		0	0	0	0	0	0	0	0	0
							TGS1		0	0	0	0	0	0	0	0	0
							TH1L		0	0	0	0	0	0	0	0	0
							THAP1		0	0	0	0	0	0	0	0	0
							THAP3		0	0	0	0	0	0	0	0	0
							THBS2		0	0	0	0	0	0	0	0	0
							THBS3		1	0	0	0	0	0	0	0	0
							THRA	inter+mi	0	0	0	0	0	0	0	0	0
							THYN1		0	0	1	0	0	0	0	0	0
							TIAF1	inter+mi	0	0	0	0	0	0	0	0	0
							TIAL1		0	0	0	0	0	0	0	0	0
							TIMM50		0	0	0	0	0	0	0	0	0
							TIMM8A		0	0	0	0	0	0	0	0	0
							TIMP1		0	0	0	1	1	0	0	0	0
							TINF2		0	0	0	0	0	0	0	0	0
							TIRAP		0	0	0	0	0	0	0	0	0
							TKT		0	0	0	0	0	0	0	0	0
							TLCD2		0	0	0	0	0	0	0	0	0
							TLN1		1	0	0	0	0	0	0	0	0
							TLN2		0	0	0	0	0	0	0	0	0
							TLR10		0	0	0	0	0	0	0	0	0
							TLR3		0	0	0	0	1	0	0	0	0
							TLR4		0	0	0	0	0	0	0	1	0
							TLR5		0	0	0	0	0	0	0	0	0
							TLR6		0	0	0	0	0	0	0	0	0
							TLR9		0	0	0	0	0	0	0	0	0
							TM6SF1		0	0	0	0	0	0	0	0	0
							TM9SF1		0	0	0	0	0	0	0	0	0
							TM9SF3	intra+mi	0	0	0	0	0	0	0	0	0
							TMBIM6		0	0	0	0	0	0	0	0	0
							TMCC3		0	0	0	0	0	0	0	0	0
							TMED10		0	0	0	0	0	0	0	0	0
							TMED4		0	0	0	0	0	0	0	0	0
							TMED7		0	0	0	0	0	0	0	0	0
							TMEM102		0	0	0	0	0	0	0	0	0
							TMEM126B		0	0	0	0	0	0	0	0	0
							TMEM140		0	0	0	0	0	1	0	0	0
							TMEM173		0	0	0	0	0	0	0	0	0
							TNFAIP3		0	0	0	0	0	0	1	0	0
							TNFAIP8		0	0	0	0	0	0	0	0	0
							TNFAIP8L1	inter+mi	0	0	0	0	0	0	0	0	0
							TNFRSF10A		0	0	0	0	0	0	0	0	0
							TNFRSF10B		0	0	0	0	0	0	0	0	0
							TNFRSF11B		0	0	0	1	0	0	0	0	0
							TNFRSF12A		1	0	0	1	0	0	0	0	0
							TNFRSF13B		0	0	0	1	0	0	0	0	0
							TNFRSF13C		0	0	0	1	0	0	0	0	0
							TNFRSF21	DB+intra+mi	0	0	0	0	0	0	0	0	0
							TNFSF10		0	0	0	0	1	0	1	0	0
							TNFSF11		0	0	0	1	0	0	0	0	0
							TNFSF15		0	0	0	1	1	0	0	0	0
							TNIP1		0	0	0	0	0	0	0	0	0
							TNIP2		1	0	0	1	0	0	0	0	0
							TNK1		0	0	0	0	0	0	0	0	0
							TNPO1		0	0	0	0	0	0	0	0	0
							TNRC6A		0	1	0	0	0	0	0	0	0
							TNRC6B		0	0	0	0	0	0	0	0	0
							TNRC6C		0	0	0	0	0	0	0	0	0
							TOB1	inter+mi	1	0	0	0	0	0	0	0	0
							TOB2		0	0	0	0	0	0	0	0	0
							TOMM20		0	0	0	0	0	0	0	0	0
							TOR1B		0	0	0	0	0	0	1	0	0
							TP53BP2		0	0	0	0	0	0	0	0	0
							TP53I3		0	0	0	0	0	0	0	0	0
							TP53INP1		0	0	0	0	0	0	0	0	0
							TPI1	inter+mi	1	0	1	0	0	0	0	0	0
							TPP1		0	0	0	0	0	0	0	0	0
							TRAF1		0	0	0	0	0	0	0	0	0
							TRAF2	inter+mi	1	0	0	1	0	0	0	0	0
							TRAF3IP1		0	0	0	0	0	0	0	0	0
							TRAF3IP2		0	0	0	0	0	0	0	0	0
							TRAFD1		0	0	0	0	0	1	1	0	0
							TRAIP		0	0	0	0	0	0	0	0	0
							TRAP1		0	0	0	0	0	0	0	0	0
							TRAPPC2		0	0	0	0	0	0	0	0	0
							TRAT1		0	0	0	0	0	0	0	0	0
							TRIB1	inter+mi	1	0	0	0	0	0	0	0	0
							TRIB2		0	0	0	0	0	0	0	0	0
							TRIM14		1	0	0	1	0	1	1	0	0
							TRIM24		1	0	0	0	0	0	0	0	0
							TRIM25		0	0	0	1	0	1	1	0	0
							TRIM28		0	0	0	0	0	0	0	0	0
							TRIM36		0	0	0	0	0	0	0	0	0
							TRIM37		0	0	0	0	0	0	0	0	0
							TRIM45		0	1	0	1	0	0	0	0	0
							TRIM65		0	0	0	0	0	0	0	0	0
							TRIM66		0	0	0	0	0	0	0	0	0
							TRIM71		0	0	0	0	0	0	0	0	0
							TRIM72		0	0	0	0	0	0	0	0	0
							TRMT1		0	0	0	0	0	0	0	0	0
							TROVE2		0	0	0	0	0	0	0	0	0
							TRPM2		1	0	0	0	0	0	0	0	0
							TRPM4		0	0	0	0	0	0	0	0	0
							TRPM6		0	1	0	0	0	0	0	0	0
							TRPV2		0	0	0	0	0	0	0	0	0
							TRRAP		0	0	0	0	0	0	0	0	0
							TSEN2		0	0	0	0	0	0	0	0	0
							TSHB		0	0	0	0	0	0	0	0	0
							TSHR		0	0	0	0	0	0	0	0	0
							TSLP		0	0	0	1	0	0	0	0	0
							TSPAN3		1	0	0	0	0	0	0	0	0
							TSPEAR		0	0	0	0	0	0	0	0	0
							TSPYL1		0	0	0	0	0	0	0	0	0
							TUB		0	0	0	0	0	0	0	0	0
							TUBA1A		0	0	0	0	0	0	0	0	0
							TUBA1C		0	0	0	0	0	0	0	0	0
							TUBB		0	0	0	0	0	0	0	0	0
							TUBB2A		0	0	0	0	0	0	0	0	0
							TUBB4B		1	0	0	0	0	0	0	0	0
							TULP4		0	0	0	0	0	0	0	0	0
							TWF1		0	0	0	0	0	0	0	0	0
							TWF2		0	0	0	0	0	0	0	0	0
							TWIST1		0	0	0	1	0	0	0	0	0
							TXK		1	0	0	0	0	0	0	0	0
							TXLNA		1	0	0	1	0	0	0	0	0
							TXNIP		0	0	0	0	0	1	1	0	0
							TXNL1		0	0	0	0	0	0	0	0	0
							TYMP		1	1	0	0	0	0	0	0	0
							TYRO3		0	0	0	0	0	0	0	0	0
							U2AF2		1	0	0	0	0	0	0	0	0
							UBA7		0	0	0	1	0	1	0	0	0
							UBB		0	0	0	1	0	0	0	1	0
							UBC		0	0	0	1	0	0	0	1	0
							UBE2B		0	0	0	0	0	0	0	0	0
							UBE2D1		0	0	0	1	0	0	0	0	0
							UBE2D2		0	0	0	1	0	0	0	0	0
							UBE2D3		0	0	0	1	0	0	0	0	0
							UBE2H		0	0	1	0	0	0	0	0	0
							UBE2Q1		0	0	0	0	0	0	0	0	0
							UBE2V1		0	0	0	1	0	0	0	0	0
							UBE2Z		0	0	0	0	0	0	0	0	0
							UBR1		0	0	0	0	0	0	0	0	0
							UBTF		0	0	0	0	0	0	0	0	0
							UCHL1		0	0	0	0	0	0	0	0	0
							UCKL1		1	0	0	0	0	0	0	0	0
							UFM1		0	0	0	0	0	0	0	0	0
							UGCG		0	0	0	0	0	0	0	0	0
							UGT8		0	0	0	0	0	0	0	0	0
							UHMK1		0	0	0	0	0	0	0	0	0
							ULK1		0	1	0	0	0	0	0	0	0
							UNC5B		0	0	0	0	0	0	0	0	0
							UQCRB		0	0	0	0	0	0	0	0	0
							UQCRC1		0	0	0	0	0	0	0	0	0
							UQCRFS1		0	0	0	0	0	0	0	0	0
							UQCRQ		1	0	0	0	0	0	0	0	0
							USP1		0	0	0	0	0	0	0	0	0
							USP10		1	0	0	0	0	0	0	0	0
							USP24		0	1	0	0	0	0	0	0	0
							USP28		0	0	0	0	0	0	0	0	0
							USP3		0	0	0	0	0	0	0	0	0
							USP32		0	0	0	0	0	0	0	0	0
							USP4		0	0	0	0	0	0	0	0	0
							USP7		0	0	0	0	0	0	0	0	0
							UTP6		0	0	0	0	0	0	0	0	0
							UTRN		0	0	0	0	0	0	0	0	0
							VAMP1		0	0	0	0	0	0	0	0	0
							VAV3		0	0	0	0	0	0	0	0	0
							VCAM1		0	0	0	1	0	0	1	0	0
							VDAC2		0	0	0	0	0	0	0	0	0
							VDR		1	0	0	0	0	0	0	0	0
							VENTX		0	0	0	0	0	0	0	0	0
							VEZF1		0	0	0	0	0	0	0	0	0
							VEZT		0	0	0	0	0	0	0	0	0
							VIM		0	0	0	1	0	0	0	0	0
							VLDLR		0	0	0	0	0	0	0	0	0
							VPS13C		0	0	0	0	0	0	0	0	0
							VPS33A		0	0	0	0	0	0	0	0	0
							VPS35		1	0	0	0	0	0	0	0	0
							VPS4A		0	0	0	0	0	0	0	0	0
							WARS		0	0	0	0	0	0	0	0	0
							WASF2		0	0	0	0	0	0	0	0	0
							WASF3		0	0	0	0	0	0	0	0	0
							WASL		0	0	0	0	0	0	0	0	0
							WDFY3		0	0	0	0	0	0	0	0	0
							WDR4	inter+mi	1	0	0	0	0	0	0	0	0
							WDR62		0	0	0	0	0	0	0	0	0
							WDR92		0	0	0	0	0	0	0	0	0
							WFIKKN1		1	0	0	0	0	0	0	0	0
							WIPF2		1	0	0	0	0	0	0	0	0
							WNK1		0	0	0	0	0	0	0	0	0
							WNK3		0	0	0	0	0	0	0	0	0
							WNT10A		0	0	0	0	0	0	0	0	0
							WNT2		0	0	0	0	0	0	0	0	0
							WNT2B		0	0	0	0	0	0	0	0	0
							WNT3A		0	0	0	0	0	0	0	0	0
							WNT5A		0	0	0	0	0	0	0	0	0
							WT1		0	0	0	0	0	0	0	0	0
							WWOX		1	1	0	0	0	0	0	0	0
							WWP2		0	0	0	0	0	0	0	0	0
							WWTR1		0	0	0	0	0	0	0	0	0
							XBP1		0	0	0	0	0	0	0	0	0
							XIAP		0	0	0	0	0	0	0	0	0
							XKR4		0	1	0	0	0	0	0	0	0
							XKR9		0	0	0	0	0	0	0	0	0
							XPC		0	0	1	0	0	0	0	0	0
							XPNPEP3		0	0	0	0	0	0	0	0	0
							XPO6		0	0	0	0	0	0	0	0	0
							XPOT		0	0	0	0	0	0	0	0	0
							XRCC3		0	0	0	0	0	0	0	0	0
							XRCC6		0	0	0	0	0	0	0	0	0
							XRN2		0	0	0	0	0	0	0	0	0
							YBX1		0	0	0	0	0	0	0	0	0
							YEATS2		0	0	0	0	0	0	0	0	0
							YES1		1	0	0	1	0	0	0	0	0
							YOD1		0	0	0	0	0	0	0	0	0
							YTHDF1		0	0	0	0	0	0	0	0	0
							YWHAB		0	0	0	0	0	0	0	1	0
							YWHAE		0	0	0	0	0	0	0	1	0
							YWHAG		0	0	0	0	0	0	0	0	0
							YWHAZ		0	0	0	1	0	0	0	1	0
							YY1	inter+mi	0	0	0	0	0	0	0	0	0
							ZBTB16		0	1	0	0	0	0	0	0	0
							ZBTB24		0	0	0	0	0	0	0	0	0
							ZBTB4	DB+intra+mi	0	0	0	0	0	0	0	0	0
							ZBTB7A		0	0	0	0	0	0	0	0	0
							ZC3H3		1	0	0	0	0	0	0	0	0
							ZCCHC11		0	0	0	0	0	0	0	0	0
							ZCCHC2		0	0	0	0	0	0	0	0	0
							ZCCHC8		0	0	0	0	0	0	0	0	0
							ZEB2		0	0	0	0	0	0	0	0	0
							ZFP30		0	0	0	0	0	0	0	0	0
							ZFP36L2		0	0	0	0	0	0	0	0	0
							ZFP91		0	0	0	0	0	0	0	0	0
							ZFYVE21		0	0	0	0	0	0	0	0	0
							ZFYVE9		0	0	0	0	0	0	0	0	0
							ZMAT3		0	0	0	0	0	0	0	0	0
							ZMIZ1		0	0	0	0	0	0	0	0	0
							ZMYND8		0	0	0	0	0	0	0	0	0
							ZNF148		0	0	0	0	0	0	0	0	0
							ZNF175		0	0	0	0	0	0	0	0	0
							ZNF207		0	0	0	0	0	0	0	0	0
							ZNF23		0	0	0	0	0	0	0	0	0
							ZNF266		0	0	0	0	0	0	0	0	0
							ZNF267		0	0	0	0	0	0	0	0	0
							ZNF281		0	0	0	0	0	0	0	0	0
							ZNF3		0	0	1	0	0	0	0	0	0
							ZNF395		0	0	0	0	0	0	0	0	0
							ZNF410		0	0	0	0	0	0	0	0	0
							ZNF451		0	0	0	0	0	0	0	0	0
							ZNF609		0	0	0	0	0	0	0	0	0
							ZNF652		0	0	0	0	0	0	0	0	0
							ZNF664		0	0	0	0	0	0	0	0	0
							ZNF766		0	0	0	0	0	0	0	0	0
							ZNF770		0	0	0	0	0	0	0	0	0
							ZNF787		1	1	0	0	0	0	0	0	0
							ZNF84		0	0	0	0	0	0	0	0	0
							ZNF85		0	0	0	0	0	0	0	0	0
							ZNF91		0	0	0	0	0	0	0	0	0
							ZWILCH		0	0	0	0	0	0	0	0	0
							ZYG11B		0	0	0	0	0	0	0	0	0
									252	86	55	185	56	27	55	94	20
									0.130773	0.044629	0.0285418	0.0960042	0.0290607	0.0140114	0.0285418	0.0487805	0.0103788

## Sheet: Cluster3
Feature	NDE	TCGA DB	hg19				all genes	found in/via	germ targets	germ genes	somatic	enrich1	inflam	alpha	gamma	top5%degree	top1%degree			germ+somatic
cg22938407	0.0324	CEP72;RP11-310P5.1	5	16	16		ACTB		0	0	0	0	0	0	0	1	1			CBL
cg04836038	0.0232	DOCK9;DOCK9;DOCK9;DOCK9;DOCK9-AS2	13	2494	2494		AKT1		1	0	0	1	0	0	0	1	1			GLI3
cg27427207	0.0131	ATP8A1;ATP8A1;ATP8A1;RP11-109E24.2	4	1067	1067		CASP3		0	0	0	1	0	0	1	1	1			KLHL9
cg15403517	0.012	SRD5A2	2	796	796		CCND1		0	0	0	1	0	0	0	1	1			MYLK
cg03160135	0.0117	VGLL2;VGLL2	6	2940	2940		CD4		1	1	0	1	0	0	0	1	1			NRXN3
cg17749443	0.0112	ZFP37;ZFP37;ZFP37	9	2896	2896		EGFR		0	0	0	0	0	0	0	1	1			ADAM19
cg15725933	0.0104	SLC19A1;SLC19A1;SLC19A1;SLC19A1;SLC19A1;SLC19A1	21	1175	1175		EP300		0	0	0	0	0	0	0	1	1			FASTKD5
cg10861017	0.01	CTD-2293H3.2;ZNF420;ZNF420;ZNF420;ZNF420;ZNF420;ZNF420;ZNF420	19	940	940		FN1		0	0	0	1	0	0	0	1	1			IGF2R
cg20748065	0.0093	POR;POR;POR;POR;POR;POR;POR;POR;POR;POR;POR;POR;POR;POR;POR	7	1890	1890		HSP90AA1		0	0	0	1	0	0	0	1	1			PCNT
cg13488557	0.0086	RP3-465N24.6;RSRP1;RSRP1;RSRP1;RSRP1;RSRP1;RSRP1;RSRP1;RSRP1;RSRP1;RSRP1;RSRP1	1	640	640		KRAS		0	1	0	1	0	0	0	1	1			TRIB1
cg06534422	0.0081	AP000350.10;MIF;MIF;MIF	22	606	606		MYC		1	0	0	1	1	0	0	1	1
cg04281204	0.0078	DCLRE1A;DCLRE1A	10	2891	2891		NOTCH1		1	0	0	0	0	0	0	1	1
cg18306327	0.0074	BFAR;BFAR;BFAR;BFAR;BFAR;BFAR;BFAR;PARN	16	369	369		TP53		0	0	0	1	0	0	0	1	1
cg12343777	0.0073	ALOX15B;ALOX15B;ALOX15B;ALOX15B;ALOX15B	17	199	199		VEGFA		0	0	0	1	0	0	0	1	1
cg16632715	0.0073	HOXD10;HOXD10;HOXD11;HOXD11;HOXD11	2	4425	4425		AANAT		0	0	0	0	0	0	0	0	0
cg27477205	0.0072	MKRN2;MKRN2;MKRN2;MKRN2OS;MKRN2OS	3	315	315		AASDHPPT		0	0	0	0	0	0	0	0	0
cg21271753	0.007	TMPRSS6;TMPRSS6;TMPRSS6;TMPRSS6;TMPRSS6;TMPRSS6	22	938	938		ABCF1		0	0	0	0	0	0	0	0	0
cg23325932	0.0068	BCKDHA;BCKDHA;BCKDHA;BCKDHA;BCKDHA;CTC-435M10.3;CTC-435M10.3;CTC-435M10.3;EXOSC5;EXOSC5;EXOSC5;EXOSC5;EXOSC5	19	1048	1048		ABCF2		0	0	0	0	0	0	0	0	0
cg20261915	0.0067	GLP2R;GLP2R;GLP2R	17	244	244		ABL2		0	1	0	1	0	0	0	0	0
cg15185001	0.0066	LSR;LSR;LSR;LSR;LSR;LSR;LSR;LSR;LSR;LSR;LSR;LSR	19	894	894		ACER2		0	0	0	0	0	0	0	0	0
cg19815928	0.0066	ATP6V0D1;ATP6V0D1;ATP6V0D1;ATP6V0D1;ATP6V0D1;ATP6V0D1;ATP6V0D1;ATP6V0D1;ATP6V0D1;ATP6V0D1;RP11-297D21.4;RP11-297D21.4	16	1688	1688		ACIN1		1	0	0	0	0	0	0	0	0
cg21255605	0.0066	FGD5-AS1;FGD5-AS1;FGD5-AS1;FGD5-AS1;FGD5-AS1;NR2C2;NR2C2;NR2C2;NR2C2;NR2C2	3	375	375		ACOX1		0	0	0	0	0	0	0	0	0
cg16907024	0.0062	0					ACSL1		0	0	0	0	0	0	0	0	0
cg22262140	0.0062	CCDC116;CCDC116;CCDC116	22	550	550		ACSL4		0	0	0	0	0	0	0	0	0
cg08780378	0.0061	EIF3J;EIF3J;EIF3J;EIF3J-AS1;EIF3J-AS1;EIF3J-AS1;EIF3J-AS1	15	1121	1121		ACTC1		0	0	0	0	0	0	0	0	0
cg26149550	0.006	AC011523.2;KLK15;KLK15;KLK15;KLK15;KLK15;KLK15	19	1284	1284		ACTG1		0	0	0	0	0	0	0	1	0
cg07651242	0.0056	ADCY1;ADCY1;ADCY1	7	1141	1141		ACTN2		0	0	0	0	0	0	0	0	0
cg01628803	0.0051	0					ACTN4		0	0	0	0	0	0	0	0	0
cg24577137	0.005	C1orf27;C1orf27;C1orf27;TPR;TPR;TPR;TPR	1	4659	4659		ACTR2		0	0	0	0	0	0	0	0	0
cg25713185	0.005	SLC19A3;SLC19A3;SLC19A3;SLC19A3;SLC19A3;SLC19A3	2	5715	5715		ADA		0	0	0	0	0	0	0	0	0
cg03761560	0.0049	DNAJB12;DNAJB12;DNAJB12;DNAJB12	10	1853	1853		ADAM15		1	0	0	0	0	0	0	0	0
cg20164558	0.0049	PPP2R5D;PPP2R5D;PPP2R5D;PPP2R5D;PPP2R5D	6	1074	1074		ADAM19		1	0	1	0	0	0	0	0	0
ENSG00000198848.11	0.0049	0					ADAM9		0	0	0	0	0	0	0	0	0
cg06872381	0.0048	DPPA3	12	197	197		ADAR		0	0	0	1	0	1	1	0	0
cg13298382	0.0048	NIT1;NIT1;NIT1;NIT1;NIT1;NIT1;NIT1;NIT1;NIT1;NIT1;NIT1;NIT1;NIT1;NIT1;NIT1;PFDN2;PFDN2	1	4028	4028		ADARB1	inter+mi	0	0	0	0	0	0	0	0	0
cg06570843	0.0047	FABP2	4	3007	3007		ADAT1		1	0	0	0	0	0	0	0	0
cg14261863	0.0047	ELMO2;ELMO2;ELMO2;ELMO2;ELMO2;ELMO2;ELMO2;ELMO2;ELMO2	20	1126	1126		ADCY1		0	0	0	0	0	0	0	0	0
cg15563952	0.0047	DHTKD1;DHTKD1	10	303	303		ADCY3		0	0	0	0	0	0	0	0	0
cg04049800	0.0046	NTPCR;NTPCR;NTPCR;NTPCR;NTPCR;NTPCR	1	5828	5828		ADCY9		0	0	0	0	0	0	0	0	0
cg20519035	0.0046	FAM83H;FAM83H	8	3621	3621		ADD3		0	0	0	0	0	0	0	0	0
cg25187533	0.0046	0					ADH5		0	0	0	0	0	0	0	0	0
cg21571665	0.0045	PTGR2;RP5-1021I20.4;RP5-1021I20.8;ZNF410;ZNF410;ZNF410;ZNF410;ZNF410;ZNF410;ZNF410;ZNF410;ZNF410;ZNF410;ZNF410;ZNF410;ZNF410;ZNF410;ZNF410	14	1859	1859		ADIPOR2		0	0	0	0	0	0	0	0	0
cg26320696	0.0044	PARVA;PARVA	11	310	310		ADORA2B		0	0	0	0	1	0	0	0	0
cg17907567	0.0043	HAMP;HAMP;HAMP	19	895	895		ADRM1		0	0	0	0	1	0	0	0	0
cg27321538	0.0042	AC053503.4;DNPEP;DNPEP;DNPEP;DNPEP;DNPEP;DNPEP;DNPEP;DNPEP;DNPEP;DNPEP;DNPEP;DNPEP;DNPEP;DNPEP;DNPEP;DNPEP	2	5507	5507		ADSL		0	0	0	0	0	0	0	0	0
ENSG00000005381.7	0.0042	0					AGL		0	0	0	0	0	0	0	0	0
cg03156547	0.0041	CDH24;CDH24;CDH24;CDH24;CDH24	14	589	589		AGPS		0	0	0	0	0	0	0	0	0
cg17280624	0.0041	PGRMC2;PGRMC2;PGRMC2;PGRMC2;PGRMC2;PGRMC2;PGRMC2	4	3231	3231		AHCY		0	0	0	0	0	0	0	0	0
cg16470957	0.0039	CYB561D2;CYB561D2;CYB561D2;CYB561D2;CYB561D2;CYB561D2;NPRL2;NPRL2;NPRL2;NPRL2;NPRL2;NPRL2;NPRL2;NPRL2;NPRL2;NPRL2;NPRL2;NPRL2;NPRL2;NPRL2;NPRL2;XXcos-LUCA11.5	3	1260	1260		AHR		0	0	0	0	1	0	0	0	0
hsa-mir-6516	0.0037	0					AHSA2		0	0	0	0	0	0	0	0	0
cg12185908	0.0036	SGOL1;SGOL1;SGOL1;SGOL1;SGOL1;SGOL1;SGOL1;SGOL1;SGOL1;SGOL1;SGOL1;SGOL1-AS1;SGOL1-AS1	3	506	506		AIFM2		0	0	0	0	0	0	0	0	0
cg27105123	0.0036	EPS8L1;RDH13;RDH13	19	1390	1390		AJUBA		1	0	0	0	0	0	0	0	0
hsa-mir-140	0.0036	0					AKAP17A		0	0	0	0	0	0	0	0	0
cg12939527	0.0035	TNIP2;TNIP2;TNIP2;TNIP2;TNIP2	4	69	69		ALDH1A1		0	0	0	0	0	0	0	0	0
cg21428681	0.0035	NKX3-1;NKX3-1	8	589	589		ALK		0	0	0	0	0	0	0	0	0
cg11285843	0.0034	TMEM41A;TMEM41A;TMEM41A;TMEM41A;TMEM41A;TMEM41A	3	4631	4631		ALOX12B		1	0	0	0	0	0	0	0	0
cg18042806	0.0033	PHYKPL;PHYKPL;PHYKPL;PHYKPL;PHYKPL;PHYKPL;PHYKPL;PHYKPL	5	4442	4442		ALOX15B		1	0	0	0	0	0	0	0	0
cg24957950	0.0033	PAK4;PAK4;PAK4;PAK4;PAK4;PAK4;PAK4;PAK4	19	991	991		ALOXE3		1	0	0	0	0	0	0	0	0
hsa-mir-30e	0.0033	0					AMD1		0	0	0	0	0	0	0	0	0
cg02624705	0.0032	DCC	18	1247	1247		AMFR		0	0	0	0	0	0	0	0	0
cg03373442	0.0032	HSPH1;HSPH1;HSPH1;HSPH1;HSPH1;HSPH1	13	794	794		AMHR2		0	0	0	0	0	0	0	0	0
cg11510269	0.0032	KNTC1;KNTC1;KNTC1;RSRC2;RSRC2;RSRC2;RSRC2;RSRC2;RSRC2;RSRC2;RSRC2;RSRC2;RSRC2;RSRC2;RSRC2	12	3076	3076		ANGPTL3		0	0	0	0	0	0	0	0	0
cg26762198	0.0032	ITFG3;ITFG3;ITFG3;ITFG3;ITFG3;ITFG3;ITFG3;ITFG3;ITFG3;ITFG3;ITFG3	16	8	8		ANKRD12		0	0	0	0	0	0	0	0	0
cg06516650	0.0031	RAB30;RAB30;RAB30;RAB30;RAB30;RAB30;RAB30;RAB30-AS1;RAB30-AS1;RAB30-AS1;RAB30-AS1;RAB30-AS1;RAB30-AS1;RAB30-AS1;RAB30-AS1	11	2070	2070		ANKRD13C		0	0	0	0	0	0	0	0	0
cg09179845	0.0031	C7	5	1023	1023		ANKRD28		0	0	0	0	0	0	0	0	0
cg04439215	0.003	GTF2F2;KCTD4	13	1145	1145		ANXA11		0	0	0	0	0	0	0	0	0
cg06392426	0.003	KRI1;KRI1;KRI1;KRI1;KRI1;KRI1;KRI1;KRI1;KRI1;KRI1	19	267	267		ANXA2		0	0	0	1	0	0	0	0	0
cg08690031	0.003	AC092573.2;CDCA7;CDCA7;CDCA7;CDCA7;CDCA7;CDCA7;CDCA7	2	4356	4356		AP1B1		0	0	0	0	0	0	0	0	0
cg11750183	0.003	C9orf40;C9orf41-AS1	9	1940	1940		AP1S3		0	0	0	0	0	0	0	0	0
cg21459921	0.003	ADRM1;ADRM1;ADRM1;ADRM1;ADRM1	20	1522	1522		AP2S1		0	0	0	0	0	0	0	0	0
cg25942450	0.003	RP11-546B8.6;TLX3	5	4269	4269		APBA1		0	0	0	0	0	0	0	0	0
cg08766742	0.0029	SLC25A19;SLC25A19;SLC25A19;SLC25A19;SLC25A19;SLC25A19;SLC25A19;SLC25A19;SLC25A19;SLC25A19;SLC25A19;SLC25A19;SLC25A19	17	1833	1833		APOA1		0	0	0	0	0	0	0	0	0
cg21284731	0.0029	DCC;DCC;DCC;DCC;RP11-671P2.1	18	1276	1276		APOA4		0	0	0	0	0	0	0	0	0
cg21589115	0.0029	DKKL1;DKKL1;DKKL1;DKKL1;DKKL1;DKKL1;TEAD2;TEAD2;TEAD2;TEAD2;TEAD2	19	1247	1247		APOA5		0	0	0	0	0	0	0	0	0
cg22409223	0.0029	PIK3R4	3	3262	3262		APOBEC3A		0	0	0	0	0	0	0	0	0
cg26475097	0.0029	QRICH1;QRICH1;QRICH1;QRICH1;QRICH1;QRICH1;QRICH1	3	1229	1229		APOBEC3F		0	0	0	0	0	0	0	0	0
hsa-mir-132	0.0029	0					APOC3		0	0	0	0	0	0	0	0	0
cg01808130	0.0028	SLC35B3	6	211	211		ARF6		0	0	0	0	0	0	0	0	0
cg05593300	0.0028	PRRX1;PRRX1;PRRX1;PRRX1	1	4266	4266		ARHGDIA		0	0	0	0	0	0	0	0	0
cg15601535	0.0028	SRD5A3;SRD5A3	4	1406	1406		ARHGDIG		1	0	0	0	0	0	0	0	0
cg20542190	0.0028	LILRA4;LILRA4	19	1372	1372		ARID3A		1	0	0	0	0	0	0	0	0
cg20914508	0.0028	GAP43;GAP43	3	2884	2884		ARID5B		0	0	0	0	0	0	1	0	0
cg04662451	0.0027	RAD51;RAD51;RAD51;RAD51;RAD51;RAD51;RAD51;RAD51;RAD51-AS1;RAD51-AS1;RAD51-AS1	15	1025	1025		ARIH2	intra+mi	0	0	0	0	0	0	0	0	0
cg05921324	0.0027	APOA4	11	2918	2918		ARL5A		0	0	0	0	0	0	0	0	0
cg18089000	0.0027	GBGT1;GBGT1;GBGT1;GBGT1;GBGT1;GBGT1;GBGT1;GBGT1	9	3401	3401		ARL6IP6		0	0	0	0	0	0	0	0	0
cg18123596	0.0027	PIP4K2B;PIP4K2B;PIP4K2B	17	924	924		ARR3		0	0	0	0	0	0	0	0	0
cg21291896	0.0027	SLC6A6;SLC6A6;SLC6A6;SLC6A6;SLC6A6;SLC6A6;SLC6A6;SLC6A6;SLC6A6	3	362	362		ART4		0	0	0	0	0	0	0	0	0
hsa-mir-374a	0.0027	0					ASF1A		0	0	0	0	0	0	0	0	0
cg00262415	0.0026	ACAP3;ACAP3;ACAP3;ACAP3;ACAP3;ACAP3;PUSL1;PUSL1;PUSL1;PUSL1	1	32	32		ATF3		0	0	0	0	0	0	0	0	0
cg04499381	0.0026	SASH3;SASH3	23	3223	3223		ATF7IP		0	0	0	0	0	0	0	0	0
cg06043190	0.0026	AC083949.1;AC083949.1;EML4;EML4;EML4;EML4;EML4	2	1060	1060		ATG16L1		0	0	0	0	0	0	0	0	0
cg13782957	0.0026	PSMA4;PSMA4;PSMA4;PSMA4;PSMA4;PSMA4;PSMA4;PSMA4;PSMA4;PSMA4;PSMA4;PSMA4;PSMA4;PSMA4;PSMA4;PSMA4;PSMA4;PSMA4	15	1971	1971		ATG5		0	0	0	0	0	0	0	0	0
cg01902747	0.0025	CCDC7;CCDC7;CCDC7;CCDC7	10	819	819		ATHL1		0	0	0	0	0	0	0	0	0
cg03694261	0.0025	C11orf63;C11orf63	11	3069	3069		ATL2		1	1	0	0	0	0	0	0	0
cg16853982	0.0025	ACTN2;ACTN2;ACTN2;ACTN2	1	5922	5922		ATM		0	0	0	0	0	0	0	1	0
cg19324172	0.0025	PPID	4	3992	3992		ATP1B3		0	0	0	0	0	0	0	0	0
cg22149792	0.0025	0					ATP2A2		0	0	0	0	1	0	0	0	0
cg26133068	0.0025	KB-1125A3.11;SLC2A11;SLC2A11;SLC2A11;SLC2A11;SLC2A11;SLC2A11;SLC2A11;SLC2A11;SLC2A11;SLC2A11;SLC2A11;SLC2A11;SLC2A11;SLC2A11;SLC2A11;SLC2A11;SLC2A11;SLC2A11;SLC2A11	22	605	605		ATP5A1	inter+mi	0	0	0	0	0	0	0	0	0
ENSG00000104918.6	0.0025	0					ATP5J		0	0	0	0	0	0	0	0	0
cg04362655	0.0024	GLRX5;GLRX5;GLRX5;SCARNA13;SNHG10;SNHG10;SNHG10;SNHG10	14	2401	2401		ATP5L		0	0	0	0	0	0	0	0	0
cg06567423	0.0024	STT3A;STT3A;STT3A;STT3A;STT3A;STT3A;STT3A-AS1	11	3137	3137		ATP5O		0	0	0	0	0	0	0	0	0
cg06896207	0.0024	IZUMO4;IZUMO4;IZUMO4;MOB3A;MOB3A;MOB3A;MOB3A	19	53	53		ATP5S		0	0	0	0	0	0	0	0	0
cg07413497	0.0024	C6orf57;C6orf57	6	1782	1782		ATP6V0A2		0	0	0	0	0	0	0	0	0
cg15863254	0.0024	ACBD3	1	5660	5660		ATP6V1G1		1	0	0	0	0	0	0	0	0
cg17685628	0.0024	NKX2-8	14	927	927		ATP8A1	DB+mi	0	0	0	0	0	0	0	0	0
cg19679281	0.0024	FANCL;FANCL;FANCL;FANCL;FANCL;FANCL;FANCL;FANCL;FANCL;RP11-334G22.1	2	1462	1462		ATP8B2		0	0	0	0	0	0	0	0	0
cg25425005	0.0024	HBM;HBZ	16	6	6		AURKAIP1		0	0	0	0	0	0	0	0	0
cg00495415	0.0023	SP1;SP1;SP1;SP1	12	1345	1345		AVPR1A		0	0	0	0	0	0	0	0	0
cg03075662	0.0023	PLSCR2;PLSCR2;PLSCR2;PLSCR2	3	3656	3656		AXIN1		1	0	0	0	0	0	0	0	0
cg07933197	0.0023	LTBP4;LTBP4;LTBP4	19	1028	1028		AZIN1		0	0	0	0	0	0	0	0	0
cg11730691	0.0023	NLRX1;NLRX1;NLRX1;NLRX1;NLRX1;NLRX1;NLRX1;NLRX1;NLRX1;NLRX1;NLRX1	11	2976	2976		B4GALT1		1	0	0	0	0	0	0	0	0
cg15602809	0.0023	0					B4GALT5		0	0	0	0	0	0	0	0	0
cg22836470	0.0023	TMEM119;TMEM119;TMEM119;TMEM119	12	2725	2725		BACH1		0	0	0	0	0	0	0	0	0
cg25192419	0.0023	DOCK5;DOCK5;DOCK5	8	627	627		BACH2		0	0	0	0	0	0	0	0	0
hsa-mir-1301	0.0023	0					BAG4		0	0	0	0	0	0	0	0	0
hsa-mir-1307	0.0023	0					BAMBI		0	0	0	0	0	0	0	0	0
cg00404599	0.0022	TSC22D3;TSC22D3;TSC22D3;TSC22D3;TSC22D3;TSC22D3;TSC22D3;TSC22D3;TSC22D3;TSC22D3;TSC22D3	23	2676	2676		BAZ1A		0	0	0	0	0	0	0	0	0
cg01880404	0.0022	L34079.2;L34079.4;PINLYP;PINLYP;XRCC1;XRCC1;XRCC1;XRCC1;XRCC1;XRCC1;XRCC1	19	1102	1102		BCL10		1	0	0	0	0	0	0	0	0
cg02141570	0.0022	ANKRD18DP;ANKRD18DP;ANKRD18DP	3	4946	4946		BCL2L11		0	0	0	1	0	0	0	0	0
cg06622725	0.0022	PEX16;PEX16;PEX16;PEX16;PEX16;PEX16;PEX16;PEX16;PEX16	11	1149	1149		BCL2L13		1	0	0	0	0	0	0	0	0
cg13132204	0.0022	ELMOD2;ELMOD2;ELMOD2;ELMOD2;ELMOD2	4	3537	3537		BCL7A		0	0	0	0	0	0	0	0	0
cg14161426	0.0022	ERAP1;ERAP1;ERAP1;ERAP1;ERAP1	5	2404	2404		BDNF		0	0	0	0	0	0	0	1	0
cg19058629	0.0022	RALBP1;RALBP1;RALBP1;RALBP1;RALBP1	18	237	237		BECN1		0	0	0	0	0	0	0	1	0
cg19352038	0.0022	CCDC140;PAX3;PAX3;PAX3;PAX3;PAX3;PAX3;PAX3;PAX3	2	5580	5580		BFAR		0	0	0	0	0	0	0	0	0
cg21637033	0.0022	TEAD4;TEAD4;TEAD4;TEAD4;TEAD4;TEAD4;TEAD4	12	77	77		BICD2		0	0	0	0	0	0	0	0	0
							BIRC5		0	0	0	1	0	0	0	0	0
							BLCAP		0	0	0	0	0	0	0	0	0
							BMI1		0	0	0	0	0	0	0	0	0
							BMP3		0	0	0	0	0	0	0	0	0
							BMP8A		0	0	0	0	0	0	0	0	0
							BNIP2		0	0	0	0	0	0	0	0	0
							BOLA3		0	0	0	0	0	0	0	0	0
							BTBD1		0	0	0	0	0	0	0	0	0
							BTBD9		0	1	0	0	0	0	0	0	0
							BTD		0	0	0	0	0	0	0	0	0
							BTG2		0	0	0	0	1	0	0	0	0
							BTLA		0	0	0	0	0	0	0	0	0
							BTN3A2		0	0	0	0	0	0	0	0	0
							C12orf10		0	0	0	0	0	0	0	0	0
							C1GALT1C1		0	0	0	0	0	0	0	0	0
							C1orf43		0	0	0	0	0	0	0	0	0
							C20orf112		0	0	0	0	0	0	0	0	0
							C21orf33		0	0	0	0	0	0	0	0	0
							C22orf29		0	0	0	0	0	0	0	0	0
							C2CD2L		1	0	0	0	0	0	0	0	0
							C3		0	0	1	0	0	0	0	0	0
							C6		0	0	0	0	0	0	0	0	0
							C6orf57		0	0	0	0	0	0	0	0	0
							C7		0	0	0	0	0	0	0	0	0
							CAB39		0	0	0	0	0	0	0	0	0
							CACNA1A		0	0	0	0	0	0	0	0	0
							CADM1		0	0	0	0	0	0	0	0	0
							CADM4		0	0	0	0	0	0	0	0	0
							CALM3		0	0	0	0	0	0	0	0	0
							CAMK4		0	0	0	0	0	0	0	0	0
							CAMSAP1		0	0	0	0	0	0	0	0	0
							CAND1		0	0	0	0	0	0	0	0	0
							CANT1		0	0	0	0	0	0	0	0	0
							CANX		0	0	0	1	0	0	0	0	0
							CAPN1		0	0	0	0	0	0	0	0	0
							CAPN10		0	0	0	0	0	0	0	0	0
							CAPZA1		0	0	0	1	0	0	0	0	0
							CAPZA2		0	0	0	0	0	0	0	0	0
							CARD8		1	0	0	0	0	0	0	0	0
							CARD9		0	0	0	0	0	0	0	0	0
							CASD1		0	0	0	0	0	0	0	0	0
							CASP10		0	0	0	0	0	0	0	0	0
							CASP6		0	0	0	0	0	0	0	0	0
							CASP7		0	0	0	0	0	0	1	0	0
							CBFA2T2		0	0	0	0	0	0	0	0	0
							CBL		1	1	1	1	0	0	0	1	0
							CBS		0	0	0	0	0	0	0	0	0
							CBX3		0	0	0	0	0	0	0	0	0
							CBX4		0	0	0	0	0	0	0	0	0
							CCDC109B		0	0	0	0	0	0	0	0	0
							CCNA2		0	0	0	0	0	0	0	1	0
							CCNL2		0	0	0	0	0	0	0	0	0
							CCNY		0	0	0	0	0	0	0	0	0
							CCPG1		0	0	0	0	0	0	0	0	0
							CCR4		0	0	0	0	0	0	0	0	0
							CCR6		0	0	0	0	0	0	0	0	0
							CCT3		0	0	0	0	0	0	0	1	0
							CCT6A		0	0	0	0	0	0	0	0	0
							CD151		1	0	0	0	0	0	0	0	0
							CD164		0	0	0	0	0	0	0	0	0
							CD22		0	0	0	0	0	0	0	0	0
							CD226		0	0	0	0	0	0	0	0	0
							CD276		0	0	0	0	0	0	0	0	0
							CD2AP		0	0	0	0	0	0	0	0	0
							CD36		0	0	0	1	0	0	0	0	0
							CD37		0	0	0	0	0	0	0	0	0
							CD38		0	0	0	0	0	0	1	0	0
							CD3EAP		0	0	0	0	0	0	0	0	0
							CD3G		0	0	0	0	0	0	0	0	0
							CD55		0	0	0	0	1	0	0	0	0
							CDC25A		1	0	0	0	0	0	0	0	0
							CDH22		0	0	0	0	0	0	0	0	0
							CDH23		1	0	0	0	0	0	0	0	0
							CDH24		1	0	0	0	0	0	0	0	0
							CDH3		0	0	0	0	0	0	0	0	0
							CDHR4		0	0	0	0	0	0	0	0	0
							CDIP1		0	0	0	0	0	0	0	0	0
							CDK4		0	0	0	0	0	0	0	1	0
							CDK5		0	0	0	0	0	0	0	0	0
							CDK6		0	0	0	0	0	0	0	0	0
							CDK9		1	0	0	0	0	0	0	0	0
							CDKN1A		0	0	0	1	1	0	1	1	0
							CDKN1B		1	0	0	1	0	0	0	0	0
							CDKN2D		0	0	0	0	0	0	0	0	0
							CDV3		0	0	0	0	0	0	0	0	0
							CEBPB		0	0	0	0	0	0	0	1	0
							CEBPD		0	0	0	1	0	0	0	0	0
							CEBPE		0	0	0	0	0	0	0	0	0
							CELSR3		0	1	0	0	0	0	0	0	0
							CENPK		0	0	0	0	0	0	0	0	0
							CERK		1	0	0	0	0	0	0	0	0
							CES1		0	0	0	0	0	0	0	0	0
							CETP		0	0	0	0	0	0	0	0	0
							CFDP1		0	0	0	0	0	0	0	0	0
							CFI		0	0	0	0	0	0	0	0	0
							CFL1		1	0	0	1	0	0	0	0	0
							CFTR		0	0	0	0	0	0	0	0	0
							CHAC1		1	0	0	0	0	0	0	0	0
							CHD1		0	0	0	0	0	0	0	0	0
							CHGA		1	1	0	0	0	0	0	0	0
							CHL1		0	0	0	0	0	0	0	0	0
							CHMP4A		0	0	0	0	0	0	0	0	0
							CHP1	inter+mi	0	0	0	0	0	0	0	0	0
							CHRNB2		0	0	1	0	0	0	0	0	0
							CHST6		0	0	0	0	0	0	0	0	0
							CIAO1		0	0	0	0	0	0	0	0	0
							CIITA		0	0	0	1	0	0	1	0	0
							CISH		0	0	0	1	0	0	0	0	0
							CKAP4		0	0	0	0	0	0	0	0	0
							CLCC1		0	0	0	0	0	0	0	0	0
							CLDN7		0	0	0	0	0	0	0	0	0
							CLIC4		0	0	0	0	0	0	0	0	0
							CLIP1		0	0	0	0	0	0	0	0	0
							CLN8		0	1	0	0	0	0	0	0	0
							CLSTN1		0	0	0	0	0	0	0	0	0
							CMTM3		0	0	0	0	0	0	0	0	0
							CNBP		1	0	0	0	0	0	0	0	0
							CNO		1	0	0	0	0	0	0	0	0
							CNPY3		0	0	0	0	0	0	0	0	0
							CNTNAP1		0	0	0	0	0	0	0	0	0
							CNTNAP5		0	0	1	0	0	0	0	0	0
							COCH		0	0	0	0	0	0	0	0	0
							COL12A1		0	0	1	0	0	0	0	0	0
							COL18A1		1	1	0	0	0	0	0	0	0
							COL1A1		0	0	0	0	0	0	0	0	0
							COL4A1		1	0	0	0	0	0	0	0	0
							COL4A3BP		0	0	0	0	0	0	0	0	0
							COL5A1		0	1	0	0	0	0	0	0	0
							COL6A1		0	0	0	0	0	0	0	0	0
							COL8A1		0	0	0	0	0	0	0	0	0
							COLEC12		0	0	0	0	0	0	0	0	0
							COMMD2		0	0	0	0	0	0	0	0	0
							COMMD9		0	0	0	0	0	0	0	0	0
							COPG		0	0	0	0	0	0	0	0	0
							COPS8		0	0	0	0	0	0	0	0	0
							CORO1C	intra+mi	0	0	0	0	0	0	0	0	0
							CORO7		0	0	0	0	0	0	0	0	0
							COX6B1		0	0	0	0	0	0	0	0	0
							CPEB4		0	0	0	0	0	0	0	0	0
							CPS1		0	0	0	0	0	0	0	0	0
							CPSF3L		0	0	0	0	0	0	0	0	0
							CR2		0	0	0	0	0	0	0	0	0
							CRCP		0	0	0	0	0	0	0	0	0
							CREBBP		0	0	1	0	0	0	0	1	0
							CREM		0	0	0	0	0	0	0	0	0
							CRISPLD2		1	1	0	0	0	0	0	0	0
							CRK		0	0	0	1	0	0	0	0	0
							CRLF3		0	0	0	0	0	0	0	0	0
							CSK		1	0	0	1	0	0	0	0	0
							CSRNP3		0	0	0	0	0	0	0	0	0
							CTDSPL2		0	0	0	0	0	0	0	0	0
							CTSD		0	0	0	0	0	0	0	0	0
							CTSZ		0	0	0	0	0	0	0	0	0
							CUBN		0	0	0	0	0	0	0	0	0
							CUL7		0	0	0	0	0	0	0	0	0
							CXCL11		1	0	0	0	1	1	1	0	0
							CXCL16		0	0	0	0	0	0	0	0	0
							CXCL5		0	0	0	0	0	0	0	0	0
							CXCL6		0	0	0	0	1	0	0	0	0
							CYB561D2		0	0	0	0	0	0	0	0	0
							CYP26A1		0	0	0	0	0	0	0	0	0
							CYP2E1		0	1	0	0	0	0	0	0	0
							CYP7B1		0	0	0	0	0	0	0	0	0
							CYR61		0	0	0	0	0	0	0	0	0
							CYTH2		0	0	0	0	0	0	0	0	0
							DAXX		0	0	0	0	0	0	0	0	0
							DCC		0	0	0	0	0	0	0	0	0
							DCTD		0	0	0	0	0	0	0	0	0
							DDA1		0	0	0	0	0	0	0	0	0
							DDIT4		0	0	0	0	0	0	0	0	0
							DDT		0	0	0	0	0	0	0	0	0
							DDX19B		0	0	0	0	0	0	0	0	0
							DEDD		0	0	0	0	0	0	0	0	0
							DENND2C		0	0	0	0	0	0	0	0	0
							DFFA		0	0	0	0	0	0	0	0	0
							DGCR8		1	0	0	0	0	0	0	0	0
							DGKD		0	0	0	0	0	0	0	0	0
							DGKH		0	0	0	0	0	0	0	0	0
							DHX58		0	0	0	0	0	1	1	0	0
							DICER1		1	0	0	0	0	0	0	1	0
							DISC1		0	0	0	0	0	0	0	0	0
							DLC1		0	0	1	0	0	0	0	0	0
							DNAJC5		1	0	0	0	0	0	0	0	0
							DNAJC9		0	0	0	0	0	0	0	0	0
							DNM2		0	0	0	0	0	0	0	0	0
							DNMT1		0	0	0	0	0	0	0	0	0
							DNPEP	DB+intra+mi	0	0	0	0	0	0	0	0	0
							DOCK10		0	1	0	0	0	0	0	0	0
							DOCK11		0	0	0	0	0	0	0	0	0
							DOCK3		0	1	0	0	0	0	0	0	0
							DOCK5		0	0	0	0	0	0	0	0	0
							DOCK7		0	0	0	0	0	0	0	0	0
							DOCK9		0	0	0	0	0	0	0	0	0
							DPM3		1	0	0	0	0	0	0	0	0
							DPP7		1	0	0	0	0	0	0	0	0
							DPP8		0	0	0	0	0	0	0	0	0
							DPY19L3		1	0	0	0	0	0	0	0	0
							DSG3		0	0	0	0	0	0	0	0	0
							DST		0	0	1	0	0	0	0	0	0
							DUSP19		0	0	0	0	0	0	0	0	0
							DUSP3		0	0	0	1	0	0	0	0	0
							DUSP8		0	0	0	0	0	0	0	0	0
							DVL1		0	0	0	0	0	0	0	0	0
							DYNLT3		0	0	0	0	0	0	0	0	0
							DYRK1A		0	0	0	0	0	0	0	0	0
							DYRK2		0	0	0	0	0	0	0	0	0
							E2F3		0	0	0	0	0	0	0	0	0
							ECT2		0	0	0	0	0	0	0	0	0
							EDEM1		0	0	0	0	0	0	0	0	0
							EDF1		1	0	0	0	0	0	0	0	0
							EED		0	0	1	0	0	0	0	0	0
							EEF1A1		0	0	0	0	0	0	0	1	0
							EEF2K		0	0	0	0	0	0	0	0	0
							EFNA1		1	0	0	0	0	0	0	0	0
							EHMT1		1	0	0	0	0	0	0	0	0
							EI24	intra+mi	0	0	0	0	0	0	0	0	0
							EIF2S3		0	0	0	0	0	0	0	0	0
							ELMO2		0	0	0	0	0	0	0	0	0
							ELMO3		1	0	0	0	0	0	0	0	0
							ELMOD2		0	0	0	0	0	0	0	0	0
							EML2		0	0	0	0	0	0	0	0	0
							ENO2		1	0	0	0	0	0	0	0	0
							ENTPD1		0	0	0	0	0	0	0	0	0
							ENTPD2		1	0	0	0	0	0	0	0	0
							ENTPD5		0	0	0	0	0	0	0	0	0
							EPRS		0	0	0	0	0	0	0	1	0
							ERAP1		0	0	0	0	0	0	0	0	0
							ERAP2		0	0	0	0	0	0	0	0	0
							ERC1		0	1	0	0	0	0	0	0	0
							ERCC1		0	0	0	0	0	0	0	0	0
							ERLIN1		0	0	0	0	0	0	0	0	0
							ERRFI1		0	0	0	0	0	0	0	0	0
							ESPL1		0	0	0	0	0	0	0	0	0
							ESR2		0	0	0	0	0	0	0	0	0
							ETHE1		0	0	0	0	0	0	0	0	0
							ETNK1		0	0	0	0	0	0	0	0	0
							EVL		0	0	0	0	0	0	0	0	0
							EXO1		0	0	0	0	0	0	0	0	0
							EXOC3L1		1	0	0	0	0	0	0	0	0
							EXOC5		0	0	0	0	0	0	0	0	0
							EXOC6B		0	0	0	0	0	0	0	0	0
							EXOSC10		0	0	0	0	0	0	0	0	0
							F11R		0	0	0	0	0	0	0	0	0
							F12		1	1	0	0	0	0	0	0	0
							FAHD1		0	0	0	0	0	0	0	0	0
							FAM104A		0	0	0	0	0	0	0	0	0
							FAM3D		1	1	0	0	0	0	0	0	0
							FAM82A2		0	0	0	0	0	0	0	0	0
							FANCA		0	0	0	0	0	0	0	0	0
							FANCF		0	0	0	0	0	0	0	0	0
							FANCL	DB+mi	0	0	0	0	0	0	0	0	0
							FASTK		1	0	0	0	0	0	0	0	0
							FASTKD5		1	0	1	0	0	0	0	0	0
							FAT3		0	0	0	0	0	0	0	0	0
							FAT4		0	0	0	0	0	0	0	0	0
							FAU		0	0	0	0	0	0	0	0	0
							FBXL16		1	0	0	0	0	0	0	0	0
							FBXW2		0	0	0	0	0	0	0	0	0
							FCRL2		0	0	0	0	0	0	0	0	0
							FDFT1		0	0	0	0	0	0	0	0	0
							FEN1		0	0	0	0	0	0	0	0	0
							FFAR3		0	1	0	0	0	0	0	0	0
							FGF2		0	0	0	1	0	0	0	1	0
							FGF22		1	0	0	0	0	0	0	0	0
							FGF5		0	0	0	0	0	0	0	0	0
							FGF9		0	0	0	0	0	0	0	0	0
							FGFR1		0	0	0	0	0	0	0	0	0
							FKBP10		0	0	0	0	0	0	0	0	0
							FKBP1A		0	0	0	0	0	0	0	0	0
							FKBP5		0	0	0	0	0	0	0	0	0
							FKBP8		0	0	0	0	0	0	0	0	0
							FMR1		0	0	0	0	0	0	0	0	0
							FNBP1		0	0	0	0	0	0	0	0	0
							FNDC3B		0	0	0	0	0	0	0	0	0
							FOSL2		0	0	0	0	0	0	0	0	0
							FOXA1		0	0	0	0	0	0	0	0	0
							FOXC1		0	0	0	0	0	0	0	0	0
							FOXN2		0	0	0	0	0	0	0	0	0
							FOXO1		0	0	0	1	0	0	0	1	0
							FOXP1		0	1	0	0	0	0	0	0	0
							FRS2		0	0	0	0	0	0	0	0	0
							FRY		1	0	0	0	0	0	0	0	0
							FSTL3		1	0	0	0	0	0	0	0	0
							FUCA1		0	0	0	0	0	0	0	0	0
							FURIN		0	0	0	0	0	0	0	0	0
							FUS		1	0	0	0	0	0	0	0	0
							FUT1		0	0	0	0	0	0	0	0	0
							FUT7		1	0	0	0	0	0	0	0	0
							FXN		0	0	0	0	0	0	0	0	0
							FXR1		0	0	0	0	0	0	0	0	0
							FZD4		0	0	0	0	0	0	0	0	0
							FZD5		0	0	0	0	1	0	0	0	0
							GAB1		0	1	0	0	0	0	0	0	0
							GABARAPL2	inter+mi	1	0	0	0	0	0	0	0	0
							GADD45A		0	0	0	0	0	0	0	0	0
							GALC		1	0	0	0	0	0	0	0	0
							GALNT1		0	0	0	0	0	0	0	0	0
							GAP43		0	0	0	0	0	0	0	0	0
							GAPVD1		0	0	0	0	0	0	0	0	0
							GATA3		0	0	0	1	0	0	0	0	0
							GATA6		1	0	0	0	0	0	0	0	0
							GBGT1		0	0	0	0	0	0	0	0	0
							GBP4		0	0	0	1	0	1	1	0	0
							GCGR		0	0	0	0	0	0	0	0	0
							GCLC		0	0	0	0	0	0	0	0	0
							GCNT1		0	0	0	0	0	0	0	0	0
							GCNT3		0	0	0	0	0	0	0	0	0
							GCSAM		0	0	0	0	0	0	0	0	0
							GDF15		0	0	0	0	0	0	0	0	0
							GDF5		0	0	0	0	0	0	0	0	0
							GDNF		0	0	0	0	0	0	0	0	0
							GGCX		0	0	0	0	0	0	0	0	0
							GIMAP4		0	0	0	0	0	0	0	0	0
							GIPR		0	0	0	0	0	0	0	0	0
							GJE1		0	0	0	0	0	0	0	0	0
							GK		0	0	0	0	0	0	0	0	0
							GLG1		0	0	0	0	0	0	0	0	0
							GLI3		0	1	1	0	0	0	0	0	0
							GLO1		0	0	0	0	0	0	0	0	0
							GLRX5	DB+intra+mi	1	0	0	0	0	0	0	0	0
							GMDS		0	0	0	0	0	0	0	0	0
							GNA13		0	0	0	0	0	0	0	0	0
							GNAI2	intra+mi	0	0	0	0	0	0	0	0	0
							GNB1		1	0	0	0	0	0	0	0	0
							GNE		0	0	0	0	0	0	0	0	0
							GNPTAB		1	0	0	0	0	0	0	0	0
							GNS		0	0	0	0	0	0	0	0	0
							GOLGA5		1	0	0	0	0	0	0	0	0
							GP6		0	0	0	0	0	0	0	0	0
							GPR107		1	0	0	0	0	0	0	0	0
							GPR132		1	0	0	0	1	0	0	0	0
							GPR35		0	0	0	0	0	0	0	0	0
							GPSM1		0	0	0	0	0	0	0	0	0
							GPX1		0	0	0	0	0	0	0	0	0
							GRAMD4		1	0	0	0	0	0	0	0	0
							GRB2		1	0	0	1	0	0	0	1	0
							GRIN1		1	0	0	0	0	0	0	0	0
							GRINA		1	0	0	0	0	0	0	0	0
							GRK6		1	0	0	0	0	0	0	0	0
							GSK3B		0	0	0	0	0	0	0	1	0
							GUK1		0	0	0	0	0	0	0	0	0
							GYLTL1B		0	0	0	0	0	0	0	0	0
							H1FX		0	0	0	0	0	0	0	0	0
							H3F3B		0	0	0	0	0	0	0	0	0
							HACE1		0	0	0	0	0	0	0	0	0
							HAMP		0	0	0	0	0	0	0	0	0
							HAVCR1		1	0	0	0	0	0	0	0	0
							HBEGF		1	0	0	0	1	0	0	0	0
							HCG25		0	0	0	0	0	0	0	0	0
							HCRT		1	0	0	0	0	0	0	0	0
							HDAC4		1	1	0	0	0	0	0	0	0
							HDAC7		1	0	0	0	0	0	0	0	0
							HDLBP		0	0	1	0	0	0	0	0	0
							HEATR5B		0	0	0	0	0	0	0	0	0
							HECTD1		0	0	0	0	0	0	0	0	0
							HERPUD1		0	0	0	0	0	0	0	0	0
							HIF1AN		0	0	0	0	0	0	0	0	0
							HIGD1A		0	0	0	0	0	0	0	0	0
							HLA-B		0	0	0	1	0	0	1	0	0
							HMGA1		0	0	0	0	0	0	0	0	0
							HMGB1		1	0	0	1	0	0	0	0	0
							HMGB2		0	0	0	0	0	0	0	0	0
							HMGN1		0	0	0	0	0	0	0	0	0
							HMGN2		1	1	0	0	0	0	0	0	0
							HOXD10		0	0	0	0	0	0	0	0	0
							HPSE		0	0	0	0	0	0	0	0	0
							HRH2		0	0	0	0	0	0	0	0	0
							HRH3		0	0	0	0	0	0	0	0	0
							HRH4		0	0	0	0	0	0	0	0	0
							HSD11B2		0	0	0	0	0	0	0	0	0
							HSP90B1		0	0	0	1	0	0	0	0	0
							HSPA1B		1	0	0	0	0	0	0	0	0
							HSPA6		0	0	0	0	0	0	0	0	0
							HSPD1		0	0	0	0	0	0	0	0	0
							HYPK		0	0	0	0	0	0	0	0	0
							IBTK		0	0	0	0	0	0	0	0	0
							ICK		0	0	0	0	0	0	0	0	0
							ICOSLG		0	0	0	0	1	0	0	0	0
							IDE		0	0	0	0	0	0	0	0	0
							IER2		0	0	0	0	0	0	0	0	0
							IER3IP1		0	0	0	0	0	0	0	0	0
							IER5		0	0	0	0	0	0	0	0	0
							IFIT1		0	0	0	1	0	0	1	0	0
							IFITM1		0	0	0	1	1	1	0	0	0
							IFITM2		0	0	0	1	0	1	1	0	0
							IFITM3		0	0	0	1	0	1	1	0	0
							IFITM5		0	0	0	0	0	0	0	0	0
							IFNAR1		0	0	0	1	1	0	0	0	0
							IFNAR2		0	0	0	1	0	0	1	0	0
							IFNE		0	0	0	0	0	0	0	0	0
							IFRD2		0	0	0	0	0	0	0	0	0
							IGF1		0	0	0	0	0	0	0	1	0
							IGF1R		0	0	0	0	0	0	0	1	0
							IGF2BP1		0	0	0	0	0	0	0	0	0
							IGF2R		1	0	1	0	0	0	0	0	0
							IGLC1		0	0	0	0	0	0	0	0	0
							IGLC2		0	0	0	0	0	0	0	0	0
							IGLC3		0	0	0	0	0	0	0	0	0
							IGLC4		0	0	0	0	0	0	0	0	0
							IGLC5		0	0	0	0	0	0	0	0	0
							IGLC6		0	0	0	0	0	0	0	0	0
							IGLC7		0	0	0	0	0	0	0	0	0
							IGLJ1		0	0	0	0	0	0	0	0	0
							IGLJ2		0	0	0	0	0	0	0	0	0
							IGLJ3		0	0	0	0	0	0	0	0	0
							IGLJ4		0	0	0	0	0	0	0	0	0
							IGLJ5		0	0	0	0	0	0	0	0	0
							IGLJ6		0	0	0	0	0	0	0	0	0
							IGLJ7		0	0	0	0	0	0	0	0	0
							IGLL5		0	0	0	0	0	0	0	0	0
							IGLV3-1		0	0	0	0	0	0	0	0	0
							IGLV3-2		0	0	0	0	0	0	0	0	0
							IGLV3-4		0	0	0	0	0	0	0	0	0
							IGLV4-3		0	0	0	0	0	0	0	0	0
							IKZF2		0	0	0	0	0	0	0	0	0
							IL10RB		0	0	0	1	0	0	0	0	0
							IL17REL		1	0	0	0	0	0	0	0	0
							IL1A		0	0	0	1	1	0	0	0	0
							IL21R		0	0	0	1	0	0	0	0	0
							IL2RB		1	0	0	1	1	0	1	0	0
							IL4R		1	0	0	1	1	1	1	0	0
							IL6R		0	0	0	1	0	0	0	0	0
							IL9RP3		1	0	0	0	0	0	0	0	0
							ILF3		0	0	0	0	0	0	0	0	0
							IMPDH2		0	0	0	0	0	0	0	0	0
							INPP4A		0	0	0	0	0	0	0	0	0
							INSIG1		0	0	0	0	0	0	0	0	0
							IP6K1		0	0	0	0	0	0	0	0	0
							IRAK1		0	0	0	1	0	0	0	0	0
							IRAK1BP1		0	0	0	0	0	0	0	0	0
							IRAK4		0	0	0	1	0	0	0	0	0
							IRF1		0	1	0	1	1	1	1	0	0
							IRF9		0	0	0	1	0	1	1	0	0
							IRGQ	intra+mi	0	0	0	0	0	0	0	0	0
							ISG20L2		0	0	0	0	0	0	0	0	0
							ITFG3		1	0	0	0	0	0	0	0	0
							ITGA10		0	1	0	0	0	0	0	0	0
							ITGA5		0	0	0	0	1	0	0	0	0
							ITGA6		0	0	0	0	0	0	0	0	0
							ITGAX		0	1	0	1	0	0	0	0	0
							ITGB7		0	0	0	0	0	0	1	0	0
							ITIH5		0	0	0	0	0	0	0	0	0
							ITPA		1	0	0	0	0	0	0	0	0
							JAK1		1	1	0	1	0	0	0	0	0
							JAM2		0	0	0	0	0	0	0	0	0
							JDP2		1	1	0	0	0	0	0	0	0
							JMJD1C		0	0	1	0	0	0	0	0	0
							JRK		0	0	0	0	0	0	0	0	0
							KAT2A		0	0	0	0	0	0	0	0	0
							KCNAB2		0	0	0	0	0	0	0	0	0
							KCTD5		0	0	0	0	0	0	0	0	0
							KCTD6		0	0	0	0	0	0	0	0	0
							KIAA0040		0	0	0	0	0	0	0	0	0
							KIAA0284		0	0	0	0	0	0	0	0	0
							KIR3DL1		0	0	0	0	0	0	0	0	0
							KIR3DL2		0	0	0	0	0	0	0	0	0
							KLF10		0	0	0	0	0	0	0	0	0
							KLF2		0	0	0	0	0	0	0	0	0
							KLF3		1	0	0	0	0	0	0	0	0
							KLF9		1	1	0	0	0	0	0	0	0
							KLHDC3		0	0	0	0	0	0	0	0	0
							KLHL21		0	0	0	0	0	0	0	0	0
							KLHL9		0	1	1	0	0	0	0	0	0
							KLLN		0	0	0	0	0	0	0	0	0
							KLRC3		0	0	0	0	0	0	0	0	0
							KLRD1		0	0	0	0	0	0	0	0	0
							KPNA1		0	1	0	1	0	0	0	0	0
							KPNA2		0	0	0	1	0	0	0	0	0
							KPNA3	inter+mi	0	0	0	1	0	0	0	0	0
							KPNA6		1	0	0	0	0	0	0	0	0
							KRR1		0	0	0	0	0	0	0	0	0
							L1CAM		0	0	0	0	0	0	0	0	0
							LAIR1		0	0	0	0	0	0	0	0	0
							LAMA5		0	0	0	1	0	0	0	0	0
							LAMB2		1	0	0	0	0	0	0	0	0
							LAMC1		0	0	0	0	0	0	0	0	0
							LAMP2		0	0	0	0	0	0	0	0	0
							LAMP3		0	0	0	0	1	1	0	0	0
							LARP1		1	0	0	0	0	0	0	0	0
							LAT2		0	0	0	0	0	0	0	0	0
							LAX1		0	0	0	0	0	0	0	0	0
							LBR		0	0	0	0	0	0	0	0	0
							LCP1		0	0	0	1	0	0	0	0	0
							LDHA		0	0	0	0	0	0	0	0	0
							LDLR		0	0	0	0	1	0	0	0	0
							LFNG		0	0	0	0	0	0	0	0	0
							LGALS1		1	0	0	0	0	0	0	0	0
							LGR4		0	0	0	0	0	0	0	0	0
							LIFR		0	0	0	1	0	0	0	0	0
							LIG4		0	0	0	0	0	0	0	0	0
							LILRA2		0	0	0	0	0	0	0	0	0
							LILRA4		0	0	0	0	0	0	0	0	0
							LILRA5	intra+mi	0	0	0	0	0	0	0	0	0
							LIMS1		0	0	0	0	0	0	0	0	0
							LIN7C		0	0	0	0	0	0	0	0	0
							LIN9		0	0	0	0	0	0	0	0	0
							LINC00598		0	0	0	0	0	0	0	0	0
							LIPA		0	0	0	0	0	0	0	0	0
							LIPG		0	0	1	0	0	0	0	0	0
							LMBR1L		0	0	0	0	0	0	0	0	0
							LMLN		0	0	0	0	0	0	0	0	0
							LMNB1		0	0	0	1	0	0	0	0	0
							LPP		0	1	0	0	0	0	0	0	0
							LRG1		1	0	0	0	0	0	0	0	0
							LRIG2		0	0	0	0	0	0	0	0	0
							LRP8		0	0	0	0	0	0	0	0	0
							LRPAP1		0	0	0	0	0	0	0	0	0
							LRRC8D		0	0	0	0	0	0	0	0	0
							LSM14A		0	0	0	0	0	0	0	0	0
							LTBP4		1	0	0	0	0	0	0	0	0
							LUC7L2		0	0	0	0	0	0	0	0	0
							LY6E		0	0	0	0	1	1	1	0	0
							LY6K	inter+mi	0	0	0	0	0	0	0	0	0
							LYL1		0	0	0	0	0	0	0	0	0
							LYRM2		0	0	0	0	0	0	0	0	0
							LYZ		0	0	0	0	0	0	0	0	0
							MAD1L1		0	0	0	0	0	0	0	0	0
							MAFG		1	0	0	0	0	0	0	0	0
							MAG		0	0	0	0	0	0	0	0	0
							MAGI3		0	0	1	0	0	0	0	0	0
							MAL2		0	0	0	0	0	0	0	0	0
							MAMDC4		1	0	0	0	0	0	0	0	0
							MAN1C1		0	1	0	0	0	0	0	0	0
							MAP3K3		1	0	0	1	0	0	0	0	0
							MAP3K9		0	0	0	0	0	0	0	0	0
							MAP4K2		0	0	0	0	0	0	0	0	0
							MAPK1		1	0	0	1	0	0	0	1	0
							MAPK7		1	0	0	1	0	0	0	0	0
							MAPK8		0	0	0	1	0	0	0	1	0
							MAPK8IP1		0	0	0	0	0	0	0	0	0
							MAPK8IP2		1	0	0	0	0	0	0	0	0
							MAPKAPK3		0	0	0	1	0	0	0	0	0
							MAPKAPK5		0	0	0	0	0	0	0	0	0
							MARCH1		0	0	0	0	0	0	0	0	0
							MAVS		0	0	0	0	0	0	0	0	0
							MAX		0	0	0	0	0	0	0	0	0
							MAZ		0	0	0	0	0	0	0	0	0
							MBNL1		0	0	0	0	0	0	0	0	0
							MCTS1		0	0	0	0	0	0	0	0	0
							MDFIC		0	0	0	0	0	0	0	0	0
							MDH2		0	0	0	0	0	0	0	0	0
							MDM2		0	0	0	0	0	0	0	1	0
							MDM4		1	0	0	0	0	0	0	0	0
							MEA1		0	0	0	0	0	0	0	0	0
							MEF2A		0	0	0	1	0	0	0	0	0
							MEF2D		1	0	0	0	0	0	0	0	0
							MEN1		0	0	0	0	0	0	0	0	0
							METTL14		0	0	0	0	0	0	0	0	0
							MIA3		0	0	0	0	0	0	0	0	0
							MIB1		0	0	0	0	0	0	0	0	0
							MICALL2		0	0	0	0	0	0	0	0	0
							MICB		0	0	0	0	0	0	0	0	0
							MICU1		0	0	0	0	0	0	0	0	0
							MIER3		0	0	0	0	0	0	0	0	0
							MIF		1	0	0	1	0	0	0	0	0
							MIF4GD		0	0	0	0	0	0	0	0	0
							MINK1		0	0	0	0	0	0	0	0	0
							MIR10B		0	0	0	0	0	0	0	0	0
							MIR152		0	0	0	0	0	0	0	0	0
							MIR328		1	0	0	0	0	0	0	0	0
							MKKS		0	0	0	0	0	0	0	0	0
							MKNK2	intra+mi	0	0	0	0	0	0	0	0	0
							MLLT10		0	1	0	0	0	0	0	0	0
							MLX		0	0	0	0	0	0	0	0	0
							MMD		0	0	0	0	0	0	0	0	0
							MMP9		0	0	0	1	0	0	0	1	0
							MPL		0	0	0	0	0	0	0	0	0
							MPO		0	0	0	0	0	0	0	0	0
							MPZL3		0	0	0	0	0	0	0	0	0
							MRFAP1L1		1	0	0	0	0	0	0	0	0
							MRPL10		0	0	0	0	0	0	0	0	0
							MRPL20		0	0	0	0	0	0	0	0	0
							MRPS10		0	0	0	0	0	0	0	0	0
							MRPS12		0	0	0	0	0	0	0	0	0
							MRPS23		0	0	0	0	0	0	0	0	0
							MSI2		1	0	0	0	0	0	0	0	0
							MSLN		1	1	0	0	0	0	0	0	0
							MST1R		0	0	0	0	0	0	0	0	0
							MTDH		0	0	0	0	0	0	0	0	0
							MTO1		0	0	0	0	0	0	0	0	0
							MUC13		0	0	0	0	0	0	0	0	0
							MUC17		0	0	1	0	0	0	0	0	0
							MUC2		0	0	0	0	0	0	0	0	0
							MUC5AC		0	0	0	0	0	0	0	0	0
							MVP		0	0	0	0	0	0	1	0	0
							MXI1		0	0	0	0	0	0	0	0	0
							MYADM		0	0	0	0	0	0	0	0	0
							MYBPC1		1	0	0	0	0	0	0	0	0
							MYLK		0	1	1	0	0	0	0	0	0
							MYO18A		0	0	0	0	0	0	0	0	0
							MYO6		0	0	0	0	0	0	0	0	0
							NACC1		0	0	0	0	0	0	0	0	0
							NAP1L1		0	0	0	0	0	0	0	0	0
							NARF		1	0	0	0	0	0	0	0	0
							NBN		0	0	0	0	0	0	0	0	0
							NCKAP1		0	0	0	0	0	0	0	0	0
							NCKAP1L		0	0	0	0	0	0	0	0	0
							NCKIPSD		0	0	0	0	0	0	0	0	0
							NCOA6		0	0	0	0	0	0	0	0	0
							NCS1		1	0	0	0	0	0	0	0	0
							NDEL1		0	0	0	0	0	0	0	0	0
							NDRG3		0	0	0	0	0	0	0	0	0
							NDUFA12		0	0	0	0	0	0	0	0	0
							NDUFA6		1	0	0	0	0	0	0	0	0
							NDUFB10		1	0	0	0	0	0	0	0	0
							NEBL		0	0	0	0	0	0	0	0	0
							NEK6		0	0	0	0	0	0	0	0	0
							NF1		0	0	0	0	0	0	0	1	0
							NFASC		0	0	0	0	0	0	0	0	0
							NFAT5		0	0	0	0	0	0	0	0	0
							NFE2L1		0	0	0	0	0	0	0	0	0
							NFE2L2		0	0	0	0	0	0	0	0	0
							NFIC		0	0	1	0	0	0	0	0	0
							NFKBIA		0	0	0	1	1	0	1	1	0
							NFYA		1	1	0	0	0	0	0	0	0
							NGFR		0	0	0	0	0	0	0	0	0
							NIN		0	0	0	0	0	0	0	0	0
							NKAP		0	0	0	0	0	0	0	0	0
							NKIRAS2		0	0	0	1	0	0	0	0	0
							NKRF		0	0	0	0	0	0	0	0	0
							NLGN2		0	0	0	0	0	0	0	0	0
							NLRC5		0	0	0	0	0	0	1	0	0
							NLRP6		0	0	0	0	0	0	0	0	0
							NLRP9		1	0	0	0	0	0	0	0	0
							NLRX1		1	0	0	0	0	0	0	0	0
							NNT		0	0	0	0	0	0	0	0	0
							NOL3		1	0	0	0	0	0	0	0	0
							NONO		0	0	0	0	0	0	0	0	0
							NOS3		1	0	0	0	0	0	0	0	0
							NPHP4		0	0	0	0	0	0	0	0	0
							NPTN		0	0	0	0	0	0	0	0	0
							NR1D2		0	0	0	0	0	0	0	0	0
							NR3C1		0	0	0	0	0	0	0	1	0
							NRBP2		0	0	0	0	0	0	0	0	0
							NRG2		0	0	0	0	0	0	0	0	0
							NRIP1		0	0	0	0	0	0	0	0	0
							NRP2		0	0	0	0	0	0	0	0	0
							NRXN2		0	0	0	0	0	0	0	0	0
							NRXN3		0	1	1	0	0	0	0	0	0
							NUCB1		0	0	0	0	0	0	0	0	0
							NUCKS1		0	0	0	0	0	0	0	0	0
							NUDT21		0	0	0	0	0	0	0	0	0
							NUMBL		0	0	0	0	0	0	0	0	0
							NUS1		0	0	0	0	0	0	0	0	0
							NUTF2		0	0	0	0	0	0	0	0	0
							OAS2		1	0	0	1	0	0	1	0	0
							OPA3		0	0	0	0	0	0	0	0	0
							OPHN1		0	0	0	0	0	0	0	0	0
							OPLAH		1	0	0	0	0	0	0	0	0
							OPRK1		0	0	0	0	1	0	0	0	0
							OPTN		0	0	0	0	0	0	0	0	0
							ORMDL3		0	0	0	0	0	0	0	0	0
							OSMR		0	0	0	1	1	0	0	0	0
							OTUD4		0	0	0	0	0	0	0	0	0
							OXA1L		0	0	0	0	0	0	0	0	0
							PACS1		0	0	0	0	0	0	0	0	0
							PAICS		0	0	0	0	0	0	0	0	0
							PAIP1		0	0	0	0	0	0	0	0	0
							PAK2		0	0	0	1	0	0	0	0	0
							PANK3		0	0	0	0	0	0	0	0	0
							PAPOLA		1	0	0	0	0	0	0	0	0
							PARL		0	0	0	0	0	0	0	0	0
							PARP1		0	0	0	0	0	0	0	1	0
							PARVA		0	0	0	0	0	0	0	0	0
							PAWR		0	0	0	0	0	0	0	0	0
							PAX3		0	0	0	0	0	0	0	0	0
							PBXIP1		0	0	1	0	0	0	0	0	0
							PCDH10		0	0	0	0	0	0	0	0	0
							PCDHA6		0	0	0	0	0	0	0	0	0
							PCMTD2		1	0	0	0	0	0	0	0	0
							PCNP		0	0	0	0	0	0	0	0	0
							PCNT		1	0	1	0	0	0	0	0	0
							PCYOX1		0	0	0	0	0	0	0	0	0
							PDCD10		0	0	0	0	0	0	0	0	0
							PDCL3		0	0	0	0	0	0	0	0	0
							PDDC1		1	0	0	0	0	0	0	0	0
							PDE12		0	0	0	1	0	0	0	0	0
							PDE4A		0	0	0	0	0	0	0	0	0
							PDE4B		0	1	0	0	1	0	1	0	0
							PDGFRA		1	1	0	0	0	0	0	0	0
							PDIA2		1	0	0	0	0	0	0	0	0
							PDK3		0	0	0	0	0	0	0	0	0
							PDLIM7	inter+mi	1	0	0	0	0	0	0	0	0
							PEG10		0	0	0	0	0	0	0	0	0
							PELI1		0	0	0	1	0	0	1	0	0
							PEX26		0	0	0	0	0	0	0	0	0
							PFDN2		0	0	0	0	0	0	0	0	0
							PFDN5		0	0	0	0	0	0	0	0	0
							PGGT1B		0	0	0	0	0	0	0	0	0
							PGRMC2		1	0	0	0	0	0	0	0	0
							PHF21A		0	0	0	0	0	0	0	0	0
							PHLDA3		0	0	0	0	0	0	0	0	0
							PHLPP1		0	0	0	0	0	0	0	0	0
							PHPT1		1	0	0	0	0	0	0	0	0
							PHTF2		0	0	0	0	0	0	0	0	0
							PIAS4		0	0	0	0	0	0	0	0	0
							PICALM		0	1	0	0	0	0	0	0	0
							PICK1		0	0	0	0	0	0	0	0	0
							PIDD		1	0	0	0	0	0	0	0	0
							PIK3R3		0	0	0	1	0	0	0	0	0
							PIK3R4		0	0	0	0	0	0	0	0	0
							PIN1		0	0	0	1	0	0	0	0	0
							PITPNC1		0	0	0	0	0	0	0	0	0
							PKNOX1		0	0	0	0	0	0	0	0	0
							PLA2G10		0	0	0	0	0	0	0	0	0
							PLA2G4C		0	1	0	0	0	0	0	0	0
							PLAA		0	0	0	0	0	0	0	0	0
							PLAGL2		0	0	0	0	0	0	0	0	0
							PLAUR		0	0	0	0	1	0	0	0	0
							PLCL1		0	0	1	0	0	0	0	0	0
							PLEC		1	0	0	0	0	0	0	0	0
							PLEKHG5		0	0	0	0	0	0	0	0	0
							PLK1		0	0	0	0	0	0	0	1	0
							PLP2		0	0	0	0	0	0	0	0	0
							PLSCR1		0	0	0	0	0	1	1	0	0
							PLSCR2		0	0	0	0	0	0	0	0	0
							PLXNA3		0	0	0	0	0	0	0	0	0
							PNMA1		1	0	0	0	0	0	0	0	0
							PNN		0	0	0	0	0	0	0	0	0
							POC1A		0	0	1	0	0	0	0	0	0
							POGK		0	0	0	0	0	0	0	0	0
							POLB		0	0	0	0	0	0	0	0	0
							POLDIP3		0	0	0	0	0	0	0	0	0
							POLR1B		0	0	0	0	0	0	0	0	0
							POLR1D		1	1	0	0	0	0	0	0	0
							POLR2F		0	0	0	0	0	0	0	0	0
							POLR2L		1	0	0	0	0	0	0	0	0
							POLR3E	inter+mi	0	0	0	0	0	0	0	0	0
							POLR3G		0	0	0	0	0	0	0	0	0
							POLR3H		0	0	0	0	0	0	0	0	0
							POLR3K	inter+mi	1	0	0	0	0	0	0	0	0
							POM121		0	0	0	1	0	0	0	0	0
							POP5		0	0	0	0	0	0	0	0	0
							POR		0	0	0	0	0	0	0	0	0
							PPARD		0	0	0	0	0	0	0	0	0
							PPARGC1B		0	0	0	0	0	0	0	0	0
							PPIA		0	0	0	1	0	0	0	0	0
							PPID		0	0	0	0	0	0	0	0	0
							PPIE		0	0	0	0	0	0	0	0	0
							PPIL2		0	0	0	0	0	0	0	0	0
							PPIL4		0	0	0	0	0	0	0	0	0
							PPIL6		0	0	0	0	0	0	0	0	0
							PPP1R12B		1	0	0	0	0	0	0	0	0
							PPP1R15A		0	0	0	0	0	0	0	0	0
							PPP1R2		0	0	0	0	0	0	0	0	0
							PPP2R1B		0	0	0	1	0	0	0	0	0
							PPP2R2B		1	0	0	0	0	0	0	0	0
							PPP2R5D		0	0	0	1	0	0	0	0	0
							PPP3CB		0	0	0	0	0	0	0	0	0
							PPP5C		0	0	0	0	0	0	0	0	0
							PPTC7		0	0	0	0	0	0	0	0	0
							PRDM1		0	0	0	0	0	0	0	0	0
							PRDX3		1	0	0	0	0	0	0	0	0
							PREPL		0	0	0	0	0	0	0	0	0
							PRKAA1		0	0	0	0	0	0	0	0	0
							PRKAR1A		0	0	0	0	0	0	0	0	0
							PRKCD		0	0	0	1	0	0	0	0	0
							PRKX		0	0	0	0	0	0	0	0	0
							PRPF8		0	0	0	0	0	0	0	0	0
							PRPS1		0	0	0	0	0	0	0	0	0
							PRR13	intra+mi	0	0	0	0	0	0	0	0	0
							PSD4		0	0	0	0	0	0	0	0	0
							PSMA2		0	0	0	1	0	0	1	0	0
							PSMA4		0	0	0	1	0	0	0	0	0
							PSMA6		0	0	0	1	0	0	0	0	0
							PSMB11		1	0	0	1	0	0	0	0	0
							PSMB2		0	0	0	1	0	0	1	0	0
							PSMB5	intra+mi	1	0	0	1	0	0	0	0	0
							PSMC3		0	0	0	1	0	0	0	0	0
							PSMD12		0	0	0	1	0	0	0	0	0
							PSMD13		0	0	0	1	0	0	0	0	0
							PSMD7		0	0	0	1	0	0	0	0	0
							PSME1		0	0	0	1	0	1	1	0	0
							PSME2		0	0	0	1	0	1	1	0	0
							PSMG1		0	0	0	0	0	0	0	0	0
							PSTPIP2		0	0	0	0	0	0	0	0	0
							PTAFR		0	0	0	1	1	0	0	0	0
							PTAR1		0	0	0	0	0	0	0	0	0
							PTBP1		1	0	0	0	0	0	0	0	0
							PTCD2		0	0	0	0	0	0	0	0	0
							PTCRA		0	0	0	0	0	0	0	0	0
							PTGFRN		0	0	0	0	0	0	0	0	0
							PTGIR		0	0	0	0	1	0	0	0	0
							PTGR2	DB+mi	0	0	0	0	0	0	0	0	0
							PTGS2		0	0	0	1	0	0	1	1	0
							PTMA		0	0	0	0	0	0	0	0	0
							PTP4A1		0	0	0	0	0	0	0	0	0
							PTPRF		0	0	0	0	0	0	0	0	0
							PTPRJ		0	0	1	1	0	0	0	0	0
							PUF60		0	0	0	0	0	0	0	0	0
							PURB		0	0	0	0	0	0	0	0	0
							PVRL4		0	0	0	0	0	0	0	0	0
							QARS		1	0	0	0	0	0	0	0	0
							QRICH1		1	0	0	0	0	0	0	0	0
							RAB11FIP3		1	0	0	0	0	0	0	0	0
							RAB11FIP4		0	1	0	0	0	0	0	0	0
							RAB18		1	0	0	0	0	0	0	0	0
							RAB21		0	0	0	0	0	0	0	0	0
							RAB22A		0	0	0	0	0	0	0	0	0
							RAB27A		0	0	0	0	0	0	0	0	0
							RAB32		0	0	0	0	0	0	0	0	0
							RAB5B		0	0	0	0	0	0	0	0	0
							RAB5C		1	0	0	0	0	0	0	0	0
							RAB8B		0	0	0	0	0	0	0	0	0
							RAB9A		0	0	0	0	0	0	0	0	0
							RAC1		0	0	0	0	0	0	0	1	0
							RACGAP1		0	0	0	0	0	0	0	0	0
							RAD23B		0	0	0	0	0	0	0	0	0
							RAF1		0	0	0	0	1	0	0	0	0
							RALA		0	0	0	1	0	0	0	0	0
							RALBP1		0	0	0	0	0	0	0	0	0
							RALGDS	intra+mi	0	0	0	0	0	0	0	0	0
							RANBP6		0	0	0	0	0	0	0	0	0
							RAP1B		0	0	1	1	0	0	0	0	0
							RAP2B		0	0	0	0	0	0	0	0	0
							RARG		0	0	0	0	0	0	0	0	0
							RARRES3		0	0	0	0	0	0	0	0	0
							RASA1		0	0	0	0	0	0	0	0	0
							RASA4		0	0	0	0	0	0	0	0	0
							RASGRP2		0	0	0	0	0	0	0	0	0
							RASSF1		0	0	0	0	0	0	0	0	0
							RASSF4		0	0	0	0	0	0	0	0	0
							RB1		0	0	0	0	0	0	0	0	0
							RBBP7		0	0	0	0	0	0	0	0	0
							RDH10		0	0	0	0	0	0	0	0	0
							REL		0	0	0	0	0	0	0	0	0
							RELA		0	0	0	1	1	0	0	1	0
							RETN		1	1	0	0	0	0	0	0	0
							REV3L		0	0	0	0	0	0	0	0	0
							RFFL		0	0	0	0	0	0	0	0	0
							RGMB		0	0	0	0	0	0	0	0	0
							RGS1		0	0	0	0	1	0	0	0	0
							RGS11		1	0	0	0	0	0	0	0	0
							RHBDD3		0	0	0	0	0	0	0	0	0
							RHBDF2		0	0	1	0	0	0	0	0	0
							RHD	intra+mi	0	0	0	0	0	0	0	0	0
							RHOA		1	0	0	0	0	0	0	1	0
							RHOT2		1	0	0	0	0	0	0	0	0
							RIC8A		0	0	0	0	0	0	0	0	0
							RIF1		0	0	0	0	0	0	0	0	0
							RIN3		1	1	0	0	0	0	0	0	0
							RNF11		0	0	0	0	0	0	0	0	0
							RNF125		0	0	0	0	0	0	0	0	0
							RNF128		0	0	0	0	0	0	0	0	0
							RNF135		0	0	0	0	0	0	0	0	0
							RNF138		0	0	0	0	0	0	0	0	0
							RNF144B		0	0	0	0	1	0	0	0	0
							RNF149		0	0	0	0	0	0	0	0	0
							RNF31		0	0	0	0	0	1	1	0	0
							ROCK2		0	0	0	0	0	0	0	0	0
							RORA		0	0	0	1	0	0	0	0	0
							RPA1		0	0	0	0	0	0	0	0	0
							RPH3AL		0	0	0	0	0	0	0	0	0
							RPL18A		0	0	0	0	0	0	0	0	0
							RPL19		1	0	0	0	0	0	0	0	0
							RPL22		0	0	0	0	0	0	0	0	0
							RPL24		0	0	0	0	0	0	0	0	0
							RPL28		0	0	0	0	0	0	0	0	0
							RPL3		0	0	0	0	0	0	0	0	0
							RPL30		0	0	0	0	0	0	0	0	0
							RPL34		0	0	0	0	0	0	0	0	0
							RPL35A		0	0	0	0	0	0	0	0	0
							RPL38		0	0	0	0	0	0	0	0	0
							RPL41		0	0	0	0	0	0	0	0	0
							RPL7		0	0	0	0	0	0	0	0	0
							RPLP0		0	0	0	1	0	0	0	1	0
							RPLP2		1	0	0	0	0	0	0	0	0
							RPS18		0	0	0	0	0	0	0	0	0
							RPS2		1	0	0	0	0	0	0	1	0
							RPS24		1	1	0	0	0	0	0	0	0
							RPS28		0	0	0	0	0	0	0	0	0
							RPS3		1	0	0	0	0	0	0	1	0
							RPS5		0	0	0	0	0	0	0	1	0
							RPS6KA1		1	1	0	1	0	0	0	0	0
							RPS7		0	0	0	0	0	0	0	0	0
							RPS8		0	0	0	0	0	0	0	0	0
							RPSA		0	0	0	0	0	0	0	1	0
							RRS1		0	0	0	0	0	0	0	0	0
							RSL1D1		0	0	0	0	0	0	0	0	0
							RSPH3		0	0	0	0	0	0	0	0	0
							RTN4		1	0	0	0	0	0	0	0	0
							S100A11		0	0	0	0	0	0	0	0	0
							S100A9		0	0	0	0	0	0	0	0	0
							S100P		1	1	0	0	0	0	0	0	0
							SACS		0	0	0	0	0	0	0	0	0
							SAE1		0	0	0	0	0	0	0	0	0
							SAMSN1	inter+mi	0	0	0	0	0	0	0	0	0
							SART3		0	0	0	0	0	0	0	0	0
							SCAMP2		1	0	0	0	0	0	0	0	0
							SCAMP3		1	0	0	0	0	0	0	0	0
							SCARF1		0	0	0	0	1	0	0	0	0
							SCD5		0	1	0	0	0	0	0	0	0
							SCOC		0	0	0	0	0	0	0	0	0
							SCP2		0	0	0	0	0	0	0	0	0
							SCRIB		1	0	0	0	0	0	0	0	0
							SCYL3		0	0	0	0	0	0	0	0	0
							SDF2		0	0	0	0	0	0	0	0	0
							SDF2L1		0	0	0	0	0	0	0	0	0
							SDF4		1	0	0	0	0	0	0	0	0
							SEC23B		0	0	0	0	0	0	0	0	0
							SELPLG		0	0	0	0	0	0	0	0	0
							SEMA3B		0	0	0	0	0	0	0	0	0
							SEMA3E		0	0	0	0	0	0	0	0	0
							SEMA3F		0	0	0	0	0	0	0	0	0
							SEMA6A		0	0	0	0	0	0	0	0	0
							SEMA6B		1	0	0	0	0	0	0	0	0
							SEPT2		0	0	0	0	0	0	0	0	0
							SERBP1		0	0	0	0	0	0	0	0	0
							SERINC3		0	0	0	0	0	0	0	0	0
							SERPINC1		0	0	0	0	0	0	0	0	0
							SERPINE1		0	0	0	0	1	0	0	0	0
							SERPINE2		0	0	0	0	0	0	0	0	0
							SET		1	0	0	0	0	0	0	0	0
							SF3A1		1	0	0	0	0	0	0	0	0
							SF3B5		0	0	0	0	0	0	0	0	0
							SFN		0	0	0	0	0	0	0	0	0
							SFXN1		0	0	0	0	0	0	0	0	0
							SGK1		0	0	0	0	0	0	0	0	0
							SGPP2		0	0	0	0	0	0	0	0	0
							SH3BGRL		0	0	0	0	0	0	0	0	0
							SH3GL1		1	1	0	0	0	0	0	0	0
							SHC1		0	0	0	1	0	0	0	1	0
							SIGLEC14		0	0	0	0	0	0	0	0	0
							SIGLEC9		0	0	0	0	0	0	0	0	0
							SIKE1		0	0	0	0	0	0	0	0	0
							SIRPA		0	0	0	0	0	0	0	0	0
							SIRT1		0	0	0	0	0	0	0	1	0
							SIX4		0	0	0	0	0	0	0	0	0
							SKI		1	0	0	0	0	0	0	0	0
							SKIL		0	0	0	0	0	0	0	0	0
							SLAIN2		0	0	0	0	0	0	0	0	0
							SLC1A2		0	0	0	0	1	0	0	0	0
							SLC25A32		0	0	0	0	0	0	0	0	0
							SLC25A37		0	0	0	0	0	0	0	0	0
							SLC27A1		0	0	0	0	0	0	0	0	0
							SLC2A11		1	0	0	0	0	0	0	0	0
							SLC33A1		0	0	1	0	0	0	0	0	0
							SLC35A1		0	0	0	0	0	0	0	0	0
							SLC35E1		0	0	0	0	0	0	0	0	0
							SLC35E2		1	0	0	0	0	0	0	0	0
							SLC38A1		0	0	1	0	0	0	0	0	0
							SLC39A10		0	0	0	0	0	0	0	0	0
							SLC4A7		0	0	0	0	0	0	0	0	0
							SLC50A1		1	0	0	0	0	0	0	0	0
							SLC5A5		1	0	0	0	0	0	0	0	0
							SLC6A6		0	0	0	0	0	0	0	0	0
							SLC7A5		0	0	0	0	0	0	0	0	0
							SLC7A6		0	0	1	0	0	0	0	0	0
							SLC9A3		1	0	0	0	0	0	0	0	0
							SLFN12L		0	0	0	0	0	0	0	0	0
							SLFN5		0	0	0	0	0	0	0	0	0
							SLMO2		0	0	0	0	0	0	0	0	0
							SLURP1		0	0	0	0	0	0	0	0	0
							SLX4		0	0	0	0	0	0	0	0	0
							SMAD2		0	0	0	0	0	0	0	1	0
							SMARCB1		1	0	0	0	0	0	0	0	0
							SMC4		0	0	0	0	0	0	0	0	0
							SMC5		1	0	0	0	0	0	0	0	0
							SMURF1		0	0	0	0	0	0	0	0	0
							SNAI1		0	0	0	0	0	0	0	1	0
							SNRPA		0	0	0	0	0	0	0	0	0
							SNRPA1		0	0	1	1	0	0	0	0	0
							SNRPD1		0	0	0	0	0	0	0	0	0
							SNRPD2		0	0	0	0	0	0	0	0	0
							SNTB2		0	0	0	0	0	0	0	0	0
							SNX10		1	0	0	0	0	0	0	0	0
							SNX5		0	0	0	0	0	0	0	0	0
							SOCS1		0	0	0	1	0	0	1	0	0
							SOCS3		1	1	0	1	0	0	1	0	0
							SOCS6		0	0	0	1	0	0	0	0	0
							SON		0	0	0	0	0	0	0	0	0
							SOS2		0	0	0	1	0	0	0	0	0
							SOX12		0	0	0	0	0	0	0	0	0
							SOX2		0	0	0	1	0	0	0	1	0
							SOX4		0	0	0	0	0	0	0	0	0
							SOX9		0	0	0	0	0	0	0	0	0
							SP1	DB+intra+mi	0	0	0	0	0	0	0	0	0
							SP110		0	0	0	0	0	1	1	0	0
							SP7		0	0	0	0	0	0	0	0	0
							SPAG9		0	0	0	0	0	0	0	0	0
							SPAST		0	0	0	0	0	0	0	0	0
							SPECC1L		0	0	0	0	0	0	0	0	0
							SPHK1		0	0	0	0	1	0	0	0	0
							SPOCK2		0	0	0	0	0	0	0	0	0
							SRP72		0	0	0	0	0	0	0	0	0
							SRR		0	0	0	0	0	0	0	0	0
							SS18		0	0	0	0	0	0	0	0	0
							SSBP2		0	0	0	0	0	0	0	0	0
							SSR3		0	0	0	0	0	0	0	0	0
							SSRP1		0	0	0	0	0	0	0	0	0
							SSX2IP		0	0	0	0	0	0	0	0	0
							ST3GAL2		0	0	0	0	0	0	0	0	0
							ST3GAL5		0	0	0	0	0	0	1	0	0
							STAT1		0	0	0	1	0	0	1	1	0
							STAT2		0	0	0	1	0	1	1	0	0
							STAT5B		1	1	0	1	0	0	0	0	0
							STK17A		0	0	0	0	0	0	0	0	0
							STK4		0	0	0	0	0	0	0	0	0
							STRN4		0	0	0	0	0	0	0	0	0
							STUB1		1	0	0	0	0	0	0	0	0
							STX10		0	0	0	0	0	0	0	0	0
							STX2		0	0	0	0	0	0	0	0	0
							STXBP2		0	0	0	1	0	0	0	0	0
							STYX		0	0	0	0	0	0	0	0	0
							SULT1B1		0	0	1	0	0	0	0	0	0
							SUMO1		0	0	0	1	0	0	0	1	0
							SUMO2		0	0	0	0	0	0	0	0	0
							SUPT16H		0	0	0	0	0	0	0	0	0
							SUPT7L		0	0	0	0	0	0	0	0	0
							SURF4		0	0	0	0	0	0	0	0	0
							SUZ12		0	0	0	0	0	0	0	0	0
							SYP		0	0	0	0	0	0	0	0	0
							SYT7		0	0	0	0	0	0	0	0	0
							TACC1		0	0	0	0	0	0	0	0	0
							TAF4B		0	0	0	0	0	0	0	0	0
							TAF8		0	0	0	0	0	0	0	0	0
							TAGAP		0	0	0	0	0	0	0	0	0
							TALDO1		1	0	0	1	0	0	0	0	0
							TANK		0	0	0	0	0	0	0	0	0
							TAPBP		0	0	0	0	1	0	1	0	0
							TARBP2		0	0	0	0	0	0	0	0	0
							TBC1D15		0	0	0	0	0	0	0	0	0
							TBC1D9		0	0	0	0	0	0	0	0	0
							TBC1D9B		1	0	0	0	0	0	0	0	0
							TBRG1		0	0	0	0	0	0	0	0	0
							TBX1		0	0	0	0	0	0	0	0	0
							TECPR1		0	0	0	0	0	0	0	0	0
							TERF1		0	0	0	0	0	0	0	0	0
							TFDP1		0	0	0	0	0	0	0	0	0
							TFDP2		0	0	0	0	0	0	0	0	0
							TFEC		0	0	0	0	0	0	0	0	0
							TFPI		0	0	0	0	0	0	0	0	0
							TFRC	inter+mi	0	0	0	0	0	0	0	0	0
							TGFA		1	0	0	0	0	0	0	0	0
							TGFB1		0	0	0	1	0	0	0	1	0
							TGFBR1		0	0	0	0	0	0	0	0	0
							TGIF1		0	0	0	0	0	0	0	0	0
							TGS1		0	0	0	0	0	0	0	0	0
							TH1L		0	0	0	0	0	0	0	0	0
							THAP3		0	0	0	0	0	0	0	0	0
							THBS1		0	0	1	0	0	0	0	0	0
							THBS2		0	0	0	0	0	0	0	0	0
							THRA	inter+mi	0	0	0	0	0	0	0	0	0
							TIAF1	inter+mi	0	0	0	0	0	0	0	0	0
							TIAL1		0	0	0	0	0	0	0	0	0
							TIMM8A		0	0	0	0	0	0	0	0	0
							TINF2		0	0	0	0	0	0	0	0	0
							TLN2		0	0	0	0	0	0	0	0	0
							TLX3		0	0	0	0	0	0	0	0	0
							TM9SF1		0	0	0	0	0	0	0	0	0
							TMBIM6		0	0	0	0	0	0	0	0	0
							TMED10		0	0	0	0	0	0	0	0	0
							TMED4		0	0	0	0	0	0	0	0	0
							TMED7		0	0	0	0	0	0	0	0	0
							TMEM109		0	0	0	0	0	0	0	0	0
							TMEM140		0	0	0	0	0	1	0	0	0
							TMEM165		0	0	0	0	0	0	0	0	0
							TMIGD2		0	0	0	0	0	0	0	0	0
							TMPO		0	0	0	0	0	0	0	0	0
							TNFAIP3		0	0	0	0	0	0	1	0	0
							TNFAIP8L1	inter+mi	0	0	0	0	0	0	0	0	0
							TNFRSF10A		0	0	0	0	0	0	0	0	0
							TNFRSF10B		0	0	0	0	0	0	0	0	0
							TNFRSF17		0	0	0	1	0	0	0	0	0
							TNFRSF9		0	0	0	1	1	0	0	0	0
							TNFSF13B		0	0	0	1	0	0	0	0	0
							TNFSF14		0	0	0	1	0	0	0	0	0
							TNFSF9		0	0	0	1	1	0	0	0	0
							TNIP2		1	0	0	1	0	0	0	0	0
							TNPO1		0	0	0	0	0	0	0	0	0
							TNRC6A		0	1	0	0	0	0	0	0	0
							TNRC6C		0	0	0	0	0	0	0	0	0
							TNXB		0	0	0	0	0	0	0	0	0
							TOB1		1	0	0	0	0	0	0	0	0
							TOP1		0	0	0	0	0	0	0	0	0
							TOR1B		0	0	0	0	0	0	1	0	0
							TP53BP2		0	0	0	0	0	0	0	0	0
							TP53INP1		0	0	0	0	0	0	0	0	0
							TPI1	inter+mi	1	0	0	0	0	0	0	0	0
							TPP1		0	0	0	0	0	0	0	0	0
							TRAF1		0	0	0	0	0	0	0	0	0
							TRAF2		1	0	0	1	0	0	0	0	0
							TRAF6		0	0	0	1	0	0	0	1	0
							TRAIP		0	0	0	0	0	0	0	0	0
							TRAPPC2		0	0	0	0	0	0	0	0	0
							TRIB1		1	0	1	0	0	0	0	0	0
							TRIM23		0	0	0	0	0	0	0	0	0
							TRIM31		0	0	0	1	0	0	0	0	0
							TRIM35		0	0	0	1	0	0	0	0	0
							TRIM36		0	0	0	0	0	0	0	0	0
							TRIM37		0	0	0	0	0	0	0	0	0
							TRIM45		0	1	0	1	0	0	0	0	0
							TRIM6		0	1	0	1	0	0	0	0	0
							TRIM72		0	0	0	0	0	0	0	0	0
							TRMT1		0	0	0	0	0	0	0	0	0
							TRPM2		1	0	0	0	0	0	0	0	0
							TRPM6		0	1	0	0	0	0	0	0	0
							TRPS1		0	0	0	0	0	0	0	0	0
							TRRAP		0	0	0	0	0	0	0	0	0
							TSC22D3		0	0	0	0	0	0	0	0	0
							TSHB		0	0	0	0	0	0	0	0	0
							TSPEAR		0	0	0	0	0	0	0	0	0
							TSPYL1		0	0	0	0	0	0	0	0	0
							TTC8		0	0	0	0	0	0	0	0	0
							TTYH1		0	0	0	0	0	0	0	0	0
							TUBA1A		0	0	0	0	0	0	0	0	0
							TUBA1C		0	0	0	0	0	0	0	0	0
							TUBB2A		0	0	0	0	0	0	0	0	0
							TULP4		0	0	0	0	0	0	0	0	0
							TWF1		0	0	0	0	0	0	0	0	0
							TXN		0	0	0	0	0	0	0	0	0
							TXNDC5		0	0	0	0	0	0	0	0	0
							TXNIP		0	0	0	0	0	1	1	0	0
							TXNL4A		0	0	0	0	0	0	0	0	0
							TYMP		1	1	0	0	0	0	0	0	0
							TYRO3		0	0	0	0	0	0	0	0	0
							UBA7		0	0	0	1	0	1	0	0	0
							UBE2D3		0	0	0	1	0	0	0	0	0
							UBE2I		0	0	0	0	0	0	0	1	0
							UBE2Q1		0	0	0	0	0	0	0	0	0
							UBE2V1		0	0	0	1	0	0	0	0	0
							UBE2W		0	0	0	0	0	0	0	0	0
							UBE3A		0	0	0	0	0	0	0	0	0
							UBE3C		1	0	0	0	0	0	0	0	0
							UBE4A		0	0	0	0	0	0	0	0	0
							UBTF		0	0	0	0	0	0	0	0	0
							UBXN1		0	0	1	0	0	0	0	0	0
							UCKL1		1	0	0	0	0	0	0	0	0
							UFC1		0	0	0	0	0	0	0	0	0
							ULBP3		0	0	0	0	0	0	0	0	0
							ULK2		0	0	0	0	0	0	0	0	0
							USF1		0	0	0	0	0	0	0	0	0
							USP1		0	0	0	0	0	0	0	0	0
							USP14		0	0	0	0	0	0	0	0	0
							USP28		0	0	0	0	0	0	0	0	0
							USP4		0	0	0	0	0	0	0	0	0
							VAV3		0	0	0	0	0	0	0	0	0
							VCAM1		0	0	0	1	0	0	1	0	0
							VCP		1	0	0	0	0	0	0	1	0
							VDAC1		0	0	0	0	0	0	0	0	0
							VDAC2		0	0	0	0	0	0	0	0	0
							VEGFB		0	0	0	0	0	0	0	0	0
							VENTX		0	0	0	0	0	0	0	0	0
							VEZF1		0	0	0	0	0	0	0	0	0
							VEZT		0	0	0	0	0	0	0	0	0
							VIM		0	0	0	1	0	0	0	0	0
							VPREB3		0	0	0	0	0	0	0	0	0
							VPS13A		0	0	0	0	0	0	0	0	0
							VPS33A		0	0	0	0	0	0	0	0	0
							VPS41		0	0	0	0	0	0	0	0	0
							VSIG1		0	0	0	0	0	0	0	0	0
							VSIG2		0	0	0	0	0	0	0	0	0
							WARS		0	0	0	0	0	0	0	0	0
							WASF2		0	0	0	0	0	0	0	0	0
							WDR4		1	0	0	0	0	0	0	0	0
							WDR6		0	0	0	0	0	0	0	0	0
							WDR61		0	0	0	0	0	0	0	0	0
							WDR92		0	0	0	0	0	0	0	0	0
							WFIKKN1		1	0	0	0	0	0	0	0	0
							WIPF2		1	0	0	0	0	0	0	0	0
							WNT3		0	0	0	0	0	0	0	0	0
							WNT3A		0	0	0	0	0	0	0	0	0
							WNT4		0	0	0	0	0	0	0	0	0
							WNT5A		0	0	0	0	0	0	0	0	0
							WWOX		1	1	0	0	0	0	0	0	0
							WWTR1		0	0	0	0	0	0	0	0	0
							XKR4		0	1	0	0	0	0	0	0	0
							XKR9		0	0	0	0	0	0	0	0	0
							XPO1		0	0	0	0	0	0	0	1	0
							XPOT		0	0	0	0	0	0	0	0	0
							XRCC1		0	0	0	0	0	0	0	0	0
							YBX1		0	0	0	0	0	0	0	0	0
							YEATS4		0	0	0	0	0	0	0	0	0
							YKT6		0	0	0	0	0	0	0	0	0
							YOD1		0	0	0	0	0	0	0	0	0
							YTHDF1		0	0	0	0	0	0	0	0	0
							YWHAB		0	0	0	0	0	0	0	1	0
							YWHAE		0	0	0	0	0	0	0	1	0
							YWHAG		0	0	0	0	0	0	0	0	0
							YWHAH		0	0	0	0	0	0	0	0	0
							YWHAZ		0	0	0	1	0	0	0	1	0
							YY1	inter+mi	0	0	0	0	0	0	0	0	0
							ZBTB7A		0	0	0	0	0	0	0	0	0
							ZC3H3		1	0	0	0	0	0	0	0	0
							ZC3H8		0	0	0	0	0	0	0	0	0
							ZCCHC2		0	0	0	0	0	0	0	0	0
							ZCCHC8		0	0	0	0	0	0	0	0	0
							ZEB2		0	0	0	0	0	0	0	0	0
							ZFAND5		0	0	0	0	0	0	0	0	0
							ZMAT3		0	0	0	0	0	0	0	0	0
							ZMIZ1	inter+mi	0	0	0	0	0	0	0	0	0
							ZMYND8		0	0	0	0	0	0	0	0	0
							ZNF148		0	0	0	0	0	0	0	0	0
							ZNF200		1	0	0	0	0	0	0	0	0
							ZNF207		0	0	0	0	0	0	0	0	0
							ZNF410	DB+mi	0	0	0	0	0	0	0	0	0
							ZNF428		0	0	0	0	0	0	0	0	0
							ZNF443		0	0	0	0	0	0	0	0	0
							ZNF451		0	0	0	0	0	0	0	0	0
							ZNF549		0	0	0	0	0	0	0	0	0
							ZNF652		0	0	0	0	0	0	0	0	0
							ZNF766		0	0	0	0	0	0	0	0	0
							ZNF85		0	0	0	0	0	0	0	0	0
									205	61	37	136	42	21	45	67	14
									0.154367	0.0459337	0.0278614	0.10241	0.0316265	0.0158133	0.0338855	0.0504518	0.0105422

## Sheet: Cluster4
Feature	NDE	TCGA DB	hg19				all genes	found in/via	germ targets	germ genes	somatic	enrich1	inflam	alpha	gamma	top5%degree	top1%degree
cg13506226	0.0555	LPAR6;LPAR6;LPAR6;LPAR6;LPAR6;LPAR6;RB1	13	1225	1225		ACTB		0	0	0	0	0	0	0	1	1
cg24841244	0.0322	CD3D;CD3D;CD3D;CD3D	11	2956	2956		AKT1		1	0	0	1	0	0	0	1	1		only som
cg27631817	0.0176	OFCC1;OFCC1;OFCC1;OFCC1	6	252	252		CD4		1	1	0	1	0	0	0	1	1		AKAP13
cg15880738	0.0164	CD3G;CD3G;CD3G;CD3G;CD3G;CD3G;CD3G	11	2956	2956		EGFR		0	0	0	0	0	0	0	1	1
cg15836722	0.0139	IL1B;IL1B;IL1B;IL1B;IL1B;IL1B;IL1B	2	2840	2840		EP300		0	0	0	0	0	0	0	1	1
hsa-mir-504	0.0139	0					ESR1		0	1	0	0	0	0	0	1	1
cg07152925	0.0138	S100B;S100B	21	1201	1201		FN1		0	0	0	1	0	0	0	1	1
cg13694749	0.0135	SCN4A;SCN4A	17	1552	1552		HSP90AA1		0	0	0	1	0	0	0	1	1
cg18085206	0.0135	CRK;CRK;CRK;CRK	17	34	34		HSPA8		0	0	0	1	0	0	0	1	1
hsa-mir-224	0.0129	0					KRAS		0	1	0	1	0	0	0	1	1
cg18347238	0.0123	RP11-343C2.11;VPS4A	16	1734	1734		MAPK1		1	0	0	1	0	0	0	1	1
hsa-mir-7-1	0.012	0					MYC		1	0	0	1	1	0	0	1	1
cg24532476	0.0117	CHFR;CHFR;CHFR;CHFR;CHFR;CHFR;CHFR;CHFR;CHFR;CHFR;CHFR;CHFR	12	3336	3336		PTEN		0	0	0	0	0	0	0	1	1
cg16025584	0.0116	C9orf142;C9orf142;C9orf142;C9orf142;C9orf142;C9orf142;C9orf142;C9orf142	9	3498	3498		STAT3		0	0	0	1	0	0	1	1	1
cg06836849	0.0115	SLC17A8;SLC17A8	12	2519	2519		TNF	inter+mi	1	1	0	1	0	0	0	1	1
ENSG00000180875.4	0.0112	0					TP53		0	0	0	1	0	0	0	1	1
cg18604842	0.0108	CCDC116;CCDC116;CCDC116	22	550	550		VEGFA		0	0	0	1	0	0	0	1	1
cg11826116	0.0106	ATF4;ATF4;ATF4	22	998	998		A1CF		0	1	0	0	0	0	0	0	0
cg20387341	0.0105	FGF10;FGF10;FGF10-AS1	5	1110	1110		A4GALT		0	0	0	0	0	0	0	0	0
cg11033833	0.0104	GPR101	23	3403	3403		AAMP		0	0	0	0	0	0	0	0	0
cg09868882	0.0103	GRM8;GRM8;GRM8;GRM8;GRM8;GRM8	7	3173	3173		ABCA7		1	0	0	0	0	0	0	0	0
ENSG00000101188.4	0.0101	0					ABCC4		0	0	0	0	0	0	0	0	0
cg02055963	0.0099	CDX2	13	714	714		ABCC5		0	0	0	0	0	0	0	0	0
cg16351184	0.0097	DPH7;DPH7;DPH7;DPH7;DPH7;DPH7;DPH7;DPH7;DPH7;DPH7	9	3512	3512		ABCF1		0	0	0	0	0	0	0	0	0
ENSG00000186891.12	0.0097	0					ABCF2	inter+mi	0	0	0	0	0	0	0	0	0
cg00894577	0.0096	SLC6A14	23	2890	2890		ABCG1		0	0	0	0	0	0	0	0	0
cg12109455	0.0093	DPYSL4;DPYSL4;DPYSL4;RP11-140A10.3	10	3351	3351		ABHD14B		0	0	0	0	0	0	0	0	0
cg20713492	0.0091	AQP10;AQP10;AQP10	1	3858	3858		ABL2		0	1	0	1	0	0	0	0	0
cg09325101	0.0088	RP11-325L12.6;SLC51B	15	1634	1634		ACER2		0	0	0	0	0	0	0	0	0
cg23506842	0.0088	PTPN7;PTPN7;PTPN7;PTPN7;PTPN7;PTPN7;PTPN7;PTPN7;PTPN7;PTPN7;PTPN7;PTPN7;PTPN7;PTPN7;PTPN7;PTPN7;PTPN7	1	5054	5054		ACP6		0	0	0	0	0	0	0	0	0
ENSG00000130707.16	0.0088	0					ACTC1		0	0	0	0	0	0	0	0	0
cg06983551	0.0087	BUB1;BUB1;BUB1;BUB1;BUB1;BUB1;BUB1	2	2786	2786		ACTG1		0	0	0	0	0	0	0	1	0
cg16005224	0.0086	SLC5A8	12	2541	2541		ACTN1		0	0	0	0	0	0	0	0	0
cg17687962	0.0086	KLK3;KLK3;KLK3;KLK3;KLK3;KLK3;KLK3;KLK3;KLK3;KLK3;KLK3;KLK3;KLK3;KLK3;KLK3	19	1284	1284		ACTN2		0	0	0	0	0	0	0	0	0
cg19853494	0.0083	C1orf112;SELL;SELL;SELL	1	4243	4243		ACTN3		0	0	0	0	0	0	0	0	0
cg17836145	0.0082	RBM11P1;VNN2;VNN2;VNN2;VNN2;VNN2	6	3328	3328		ACTN4		0	0	0	0	0	0	0	0	0
cg24046474	0.0082	LRSAM1;LRSAM1;LRSAM1;LRSAM1;RPL12;RPL12;RPL12;RPL12;RPL12	9	3256	3256		ACVR1B		0	0	0	0	1	0	0	0	0
ENSG00000168542.11	0.008	0					ADA		0	0	0	0	0	0	0	0	0
cg14060828	0.0079	GFY;PTH2	19	1249	1249		ADAM15		1	0	0	0	0	0	0	0	0
hsa-mir-193b	0.0077	0					ADAM17		0	0	0	1	0	0	0	0	0
cg00135393	0.0076	FGG;FGG;FGG;FGG;FGG;FGG;FGG;FGG;FGG;FGG;FGG	4	3889	3889		ADAM9		0	0	0	0	0	0	0	0	0
cg23651356	0.0074	RGS17	6	3837	3837		ADAMTS13		0	0	0	0	0	0	0	0	0
cg24471268	0.0074	LRRC23;LRRC23;SPSB2;SPSB2;SPSB2;SPSB2;U47924.6;U47924.6;U47924.6;U47924.6	12	175	175		ADAMTS5		0	0	0	0	0	0	0	0	0
hsa-mir-6820	0.0072	0					ADARB1		0	0	0	0	0	0	0	0	0
cg08072716	0.007	GPR62	3	1300	1300		ADAT1		1	0	0	0	0	0	0	0	0
cg13897627	0.007	RP11-491F9.3	16	1235	1235		ADCY2		0	0	0	0	0	0	0	0	0
cg02125271	0.0069	SNRPN;SNRPN;SNRPN;SNRPN;SNRPN;SNRPN;SNRPN;SNRPN;SNRPN;SNRPN;SNURF;SNURF;SNURF;SNURF;SNURF	15	631	631		ADCY9		0	0	0	0	0	0	0	0	0
cg24546463	0.0068	SNX31;SNX31;SNX31;SNX31	8	2542	2542		ADCYAP1		0	0	0	0	0	0	0	0	0
ENSG00000186827.9	0.0068	0					ADD3		0	0	0	0	0	0	0	0	0
cg01108476	0.0061	TCP11;TCP11;TCP11;TCP11;TCP11;TCP11;TCP11;TCP11;TCP11;TCP11;TCP11;TCP11;TCP11;TCP11;TCP11;TCP11;TCP11;TCP11;TCP11;TCP11;TCP11;TCP11;TCP11;TCP11;TCP11;TCP11;TCP11	6	878	878		ADI1		0	0	0	0	0	0	0	0	0
cg27344326	0.0061	0					ADK		0	0	0	0	0	0	0	0	0
cg16672449	0.006	RUVBL1;RUVBL1	3	3197	3197		ADORA2B		0	0	0	0	1	0	0	0	0
cg26540515	0.0059	ANGPT4	20	23	23		ADRA2A		0	0	0	0	0	0	0	0	0
ENSG00000103742.10	0.0059	0					AEN		0	0	0	0	0	0	0	0	0
cg12163490	0.0058	CDH11;CDH11;CDH11;CDH11;CDH11;CDH11;CDH11;CDH11;CDH11;CDH11;CDH11;CDH11;CDH11	16	1629	1629		AGK		0	0	0	0	0	0	0	0	0
cg19629292	0.0058	FEZF2;FEZF2;FEZF2	3	1559	1559		AGPAT1		0	0	0	0	0	0	0	0	0
cg24659201	0.0058	GPR39;GPR39	2	3330	3330		AGPAT2		1	0	0	0	0	0	0	0	0
cg26568669	0.0058	C6orf57;C6orf57	6	1782	1782		AHCY		0	0	0	0	0	0	0	0	0
ENSG00000150594.6	0.0058	0					AHSA2		0	0	0	0	0	0	0	0	0
cg08211091	0.0057	NAT8L;NAT8L	4	52	52		AIF1		1	0	0	0	0	0	0	0	0
cg09381701	0.0057	SASH1;SASH1	6	3717	3717		AIFM2		0	0	0	0	0	0	0	0	0
cg13618372	0.0057	AC092839.3;SPTBN1;SPTBN1;SPTBN1;SPTBN1	2	1369	1369		AIMP2		0	0	0	0	0	0	0	0	0
cg17618092	0.0057	RBM14;RBM14;RBM14;RBM14;RBM14;RBM14;RBM14;RBM14;RBM14-RBM4;RBM14-RBM4;RBM14-RBM4;RBM14-RBM4	11	1660	1660		AIP		0	0	0	1	0	0	0	0	0
cg19345602	0.0056	PATE1;PATE1;PATE1	11	3141	3141		AIRE		0	0	0	0	0	0	0	0	0
cg22792432	0.0056	ROCK1	18	468	468		AKAP1		0	0	0	0	0	0	0	0	0
cg25587233	0.0056	CRAT;CRAT;CRAT;CRAT;CRAT;CRAT;CRAT;PPP2R4;PPP2R4	9	3297	3297		AKAP11		0	0	0	0	0	0	0	0	0
cg24010952	0.0055	BDKRB2;BDKRB2;BDKRB2;RP11-404P21.8	14	2417	2417		AKAP13		0	0	1	0	0	0	0	0	0
cg24173049	0.0055	SLC16A13;SLC16A13	17	174	174		AKAP17A		0	0	0	0	0	0	0	0	0
cg26637069	0.0055	APLNR;APLNR;APLNR	11	1426	1426		AKNA		1	1	0	0	0	0	0	0	0
cg03198372	0.0054	KREMEN1;KREMEN1;KREMEN1;chr22-38_28785274-29006793.1	22	737	737		AKR1C2		0	0	0	0	0	0	0	0	0
cg00497251	0.0053	ANKMY1;ANKMY1;RNPEPL1;RNPEPL1;RNPEPL1	2	6038	6038		AKR7A2		0	1	0	0	0	0	0	0	0
cg17293470	0.0053	COQ10B;COQ10B;COQ10B;COQ10B	2	4958	4958		ALDH16A1		0	0	0	0	0	0	0	0	0
cg04541607	0.0052	CRYBB1	22	676	676		ALDH1A1		0	0	0	0	0	0	0	0	0
cg08331313	0.0052	CTB-113P19.1;CTB-113P19.1;SPARC;SPARC;SPARC;SPARC;SPARC	5	3777	3777		ALDH1A2		0	0	0	0	0	0	0	0	0
cg24132694	0.0052	CTD-3193O13.1;SNAPC2;SNAPC2;SNAPC2;SNAPC2;SNAPC2;SNAPC2	19	200	200		ALDH1A3		0	0	0	0	0	0	0	0	0
cg12090388	0.0051	RPL11;RPL11;RPL11;RPL11;RPL11	1	601	601		ALDH3A2		0	0	0	0	0	0	0	0	0
hsa-mir-452	0.0051	0					ALDH3B1		1	0	0	0	0	0	0	0	0
cg06762858	0.005	0					ALDH5A1		0	0	0	0	0	0	0	0	0
cg07465609	0.005	EYS;EYS;EYS;EYS;EYS;EYS;EYS;EYS	6	1656	1656		ALG1		0	0	0	0	0	0	0	0	0
cg12609467	0.005	DAG1;DAG1;DAG1;DAG1;DAG1;DAG1;DAG1;DAG1;DAG1;DAG1;DAG1;DAG1;DAG1;DAG1;DAG1;DAG1;DAG1;DAG1;DAG1;DAG1	3	1238	1238		ALKBH5		0	0	0	0	0	0	0	0	0
cg17111669	0.005	NCOA5;NCOA5	20	1118	1118		ALOX12		0	0	0	0	0	0	0	0	0
cg19863740	0.005	PARVG;PARVG;PARVG;PARVG;PARVG;PARVG;PARVG;PARVG;PARVG;PARVG	22	1115	1115		ALOX5AP		0	0	0	0	0	0	0	0	0
cg22792910	0.005	ANXA4;ANXA4;ANXA4;ANXA4;ANXA4;ANXA4;ANXA4	2	1751	1751		AMFR		0	0	0	0	0	0	0	0	0
cg18463686	0.0049	CLEC5A;CLEC5A;CLEC5A;CLEC5A;CLEC5A;CLEC5A;MGAM	7	3542	3542		ANAPC1		0	0	0	0	0	0	0	0	0
cg24986868	0.0049	CCDC148;CCDC148;CCDC148;CCDC148;CCDC148;CCDC148;CCDC148;PKP4;PKP4;PKP4;PKP4;PKP4;PKP4;PKP4;PKP4;PKP4	2	3983	3983		ANGPT4		0	0	0	0	0	0	0	0	0
cg11398680	0.0048	PTK2;PTK2;PTK2;PTK2;PTK2;PTK2;PTK2;PTK2;PTK2;PTK2;PTK2;PTK2;PTK2;PTK2;PTK2;PTK2;PTK2;PTK2;PTK2	8	3551	3551		ANGPTL3		0	0	0	0	0	0	0	0	0
cg25302419	0.0048	CTNND2;CTNND2;CTNND2;CTNND2;CTNND2;CTNND2;CTNND2	5	298	298		ANKRD12		0	0	0	0	0	0	0	0	0
cg01351032	0.0047	CIITA;CIITA;CIITA;CIITA;CIITA;CIITA;CIITA;CIITA;CIITA;RP11-876N24.2;RP11-876N24.2	16	275	275		ANP32B		0	0	0	0	0	0	0	0	0
cg04451770	0.0047	ENTPD1;ENTPD1;ENTPD1;ENTPD1;ENTPD1;ENTPD1;ENTPD1;ENTPD1-AS1	10	2438	2438		ANXA11		0	0	0	0	0	0	0	0	0
cg08268099	0.0047	OLFM1;OLFM1;OLFM1;OLFM1;OLFM1	9	3450	3450		ANXA4		0	0	0	0	0	0	0	0	0
cg19764436	0.0047	GNAZ;GNAZ;RSPH14	22	586	586		ANXA5		0	0	0	0	0	0	0	1	0
cg09793866	0.0046	RP11-90P5.2;STAR;STAR	8	951	951		AOX1		0	0	0	0	0	0	0	0	0
cg16050349	0.0046	PIK3CB;PIK3CB;PIK3CB;PIK3CB;PIK3CB;PIK3CB	3	3462	3462		AP1M1		1	0	0	0	0	0	0	0	0
ENSG00000077942.16	0.0046	0					AP1S1		0	0	0	0	0	0	0	0	0
cg06692050	0.0045	SFRP5	10	2489	2489		APAF1		0	0	0	0	0	0	0	0	0
cg16977872	0.0045	FKBP2;FKBP2;FKBP2;FKBP2;FKBP2;FKBP2	11	1601	1601		APBA1		0	0	0	0	0	0	0	0	0
cg18312429	0.0045	SLC10A2	13	2593	2593		APEH		0	0	0	0	0	0	0	0	0
hsa-mir-3667	0.0045	0					API5		0	0	0	0	0	0	0	0	0
cg14446712	0.0044	AC098617.1;SDPR	2	4818	4818		APLN		0	0	0	0	0	0	0	0	0
cg19502744	0.0044	SRD5A2	2	796	796		APOBEC3A		0	0	0	0	0	0	0	0	0
cg20119635	0.0044	DYNLT3;DYNLT3;DYNLT3;RP5-972B16.2	23	943	943		APOBEC3B		0	0	0	0	0	0	0	0	0
cg20556988	0.0044	CCL1	17	818	818		APOBEC3F		0	0	0	0	0	0	0	0	0
cg21614638	0.0044	DAPP1;DAPP1;DAPP1	4	2519	2519		APOL3		0	0	0	0	0	0	0	0	0
hsa-mir-140	0.0044	0					APP		0	0	0	1	0	0	0	1	0
ENSG00000108821.12	0.0044	0					ARF6		0	0	0	0	0	0	0	0	0
cg08455548	0.0043	PCDH11Y;PCDH11Y;PCDH11Y;PCDH11Y;RP11-122L9.1	24	122	122		ARFRP1		0	0	0	0	0	0	0	0	0
cg15301525	0.0043	ATP6V0D1;ATP6V0D1;ATP6V0D1;ATP6V0D1;ATP6V0D1;ATP6V0D1;ATP6V0D1;ATP6V0D1;ATP6V0D1;ATP6V0D1;RP11-297D21.4;RP11-297D21.4	16	1688	1688		ARG1		0	0	0	0	0	0	0	0	0
cg16522484	0.0043	SYNE3;SYNE3;SYNE3	14	2399	2399		ARHGAP19		0	0	0	0	0	0	0	0	0
cg20000468	0.0043	IFNAR2;IFNAR2;IFNAR2;IFNAR2;IFNAR2;IFNAR2;IFNAR2;IFNAR2;IFNAR2	21	866	866		ARHGDIG		1	0	0	0	0	0	0	0	0
cg00447208	0.0042	TMC6;TMC6;TMC6;TMC6;TMC6;TMC6;TMC6;TMC6;TMC6;TMC6;TMC8;TMC8;TMC8;TMC8	17	1904	1904		ARHGEF12		0	1	0	0	0	0	0	0	0
cg10368981	0.0042	DPYSL2;DPYSL2;DPYSL2;DPYSL2	8	661	661		ARHGEF17		0	0	0	0	0	0	0	0	0
cg13383491	0.0042	GPR85;GPR85;GPR85;GPR85;GPR85;GPR85	7	2819	2819		ARID3A		1	0	0	0	0	0	0	0	0
cg24678320	0.0042	ZNF792;ZNF792	19	887	887		ARID5B		0	0	0	0	0	0	1	0	0
cg26944151	0.0042	FAM69B	9	3491	3491		ARL8A	intra+mi	0	0	0	0	0	0	0	0	0
cg05881762	0.0041	UBE3A;UBE3A;UBE3A;UBE3A;UBE3A;UBE3A;UBE3A;UBE3A;UBE3A;UBE3A;UBE3A;UBE3A;UBE3A;UBE3A;UBE3A	15	643	643		ARMC1		0	0	0	0	0	0	0	0	0
cg11011938	0.0041	SEMA5A;SNHG18;SNHG18	5	239	239		ARMCX6		0	0	0	0	0	0	0	0	0
cg13873733	0.0041	ENOPH1;ENOPH1;ENOPH1;ENOPH1;HNRNPDL;HNRNPDL;HNRNPDL;HNRNPDL;HNRNPDL	4	2084	2084		ARRDC1		1	0	0	0	0	0	0	0	0
cg21509846	0.0041	BEX1	23	2558	2558		ART4		0	0	0	0	0	0	0	0	0
cg22459146	0.0041	GHSR;GHSR	3	4305	4305		ASGR1		0	0	0	0	0	0	0	0	0
hsa-mir-23a	0.0041	0					ASNS		0	0	0	0	0	0	0	0	0
cg00495491	0.004	0					ASS1		0	0	0	0	0	0	0	0	0
cg02630888	0.004	FBXL5;FBXL5;FBXL5;FBXL5;FBXL5;FBXL5;FBXL5;FBXL5;FBXL5;FBXL5	4	392	392		ASXL1		0	0	0	0	0	0	0	0	0
cg02764897	0.004	KRTAP13-1;KRTAP13-2	21	795	795		ATF1		0	0	0	1	0	0	0	0	0
cg02919422	0.004	SOX17	8	1385	1385		ATF4		1	0	0	0	0	0	0	0	0
cg02945646	0.004	AP1G2;AP1G2;AP1G2;AP1G2;AP1G2;AP1G2;AP1G2;AP1G2;AP1G2;AP1G2;AP1G2;AP1G2;AP1G2;AP1G2;AP1G2;AP1G2;AP1G2;AP1G2;AP1G2;RP11-66N24.3	14	601	601		ATF5		0	0	0	0	0	0	0	0	0
							ATG5		0	0	0	0	0	0	0	0	0
							ATG9A		0	0	0	0	0	0	0	0	0
							ATP1A1		0	0	0	0	0	0	0	0	0
							ATP1B3		0	0	0	0	0	0	0	0	0
							ATP2B4		0	0	0	0	0	0	0	0	0
							ATP5A1		0	0	0	0	0	0	0	0	0
							ATP5B		0	0	0	0	0	0	0	0	0
							ATP5D		0	0	0	0	0	0	0	0	0
							ATP5G1		0	0	0	0	0	0	0	0	0
							ATP5G3		1	1	0	0	0	0	0	0	0
							ATP6AP1		0	0	0	0	0	0	0	0	0
							ATP6V0C		0	0	0	0	0	0	0	0	0
							ATP6V1G2		1	0	0	0	0	0	0	0	0
							ATP7A		0	0	0	0	0	0	0	0	0
							ATP8A1		0	0	0	0	0	0	0	0	0
							ATP8B2		0	0	0	0	0	0	0	0	0
							ATRIP		1	0	0	0	0	0	0	0	0
							ATXN7		0	0	0	0	0	0	0	0	0
							AVP		1	0	0	0	0	0	0	0	0
							AXIN1		1	0	0	0	0	0	0	0	0
							B3GNTL1		1	0	0	0	0	0	0	0	0
							B4GALT1		1	0	0	0	0	0	0	0	0
							B4GALT6		0	0	0	0	0	0	0	0	0
							BAD		0	0	0	0	0	0	0	0	0
							BAG4	intra+mi	0	0	0	0	0	0	0	0	0
							BAG5		0	0	0	0	0	0	0	0	0
							BAG6	inter+mi	0	0	0	0	0	0	0	0	0
							BAMBI		0	0	0	0	0	0	0	0	0
							BARD1		0	0	0	0	0	0	0	0	0
							BASP1		0	0	0	0	0	0	0	0	0
							BAX		0	0	0	0	0	0	0	0	0
							BAZ1B		0	0	0	0	0	0	0	0	0
							BBC3		0	0	0	0	0	0	0	0	0
							BCAN		0	0	0	0	0	0	0	0	0
							BCAP29		0	0	0	0	0	0	0	0	0
							BCAR1		0	0	0	0	0	0	0	0	0
							BCCIP		0	0	0	0	0	0	0	0	0
							BCL2		0	0	0	1	0	0	0	0	0
							BCL2L11		0	0	0	1	0	0	0	0	0
							BCL2L12		0	0	0	0	0	0	0	0	0
							BCL2L15		0	0	0	0	0	0	0	0	0
							BCL6B		0	0	0	0	0	0	0	0	0
							BCL7C		1	0	0	0	0	0	0	0	0
							BCL9L		0	0	0	0	0	0	0	0	0
							BDKRB2		0	0	0	0	0	0	0	0	0
							BICD2		0	0	0	0	0	0	0	0	0
							BIRC5	intra+mi	0	0	0	1	0	0	0	0	0
							BIRC7		0	0	0	0	0	0	0	0	0
							BIRC8		0	0	0	0	0	0	0	0	0
							BLM		1	0	0	0	0	0	0	0	0
							BMI1		0	0	0	0	0	0	0	0	0
							BMP5		0	0	0	0	0	0	0	0	0
							BMP7		0	0	0	0	0	0	0	0	0
							BMP8B		0	0	0	0	0	0	0	0	0
							BMPR1A		0	0	0	0	0	0	0	0	0
							BMPR2		0	0	0	0	0	0	0	0	0
							BPI		0	0	0	0	0	0	0	0	0
							BRCA1		0	0	0	0	0	0	0	1	0
							BRCC3		0	0	0	0	0	0	0	0	0
							BRS3		0	0	0	0	0	0	0	0	0
							BSG		1	0	0	0	0	0	0	0	0
							BTG2		0	0	0	0	1	0	0	0	0
							BTLA		0	0	0	0	0	0	0	0	0
							BTN3A2		0	0	0	0	0	0	0	0	0
							BTRC		0	0	0	1	0	0	0	0	0
							BUB1	DB+mi	0	0	0	0	0	0	0	0	0
							BUB1B		0	0	0	0	0	0	0	0	0
							BZW1		0	0	0	0	0	0	0	0	0
							C11orf58		0	0	0	0	0	0	0	0	0
							C12orf57		1	0	0	0	0	0	0	0	0
							C16orf58		0	0	0	0	0	0	0	0	0
							C19orf24		0	0	0	0	0	0	0	0	0
							C19orf6		1	0	0	0	0	0	0	0	0
							C1QBP		0	0	0	0	0	0	0	0	0
							C1QTNF2		0	0	0	0	0	0	0	0	0
							C1S		0	0	0	0	0	1	1	0	0
							C2		0	0	0	0	0	0	0	0	0
							C20orf24		0	0	0	0	0	0	0	0	0
							C21orf33		0	0	0	0	0	0	0	0	0
							C21orf91		0	0	0	0	0	0	0	0	0
							C2CD2		1	0	0	0	0	0	0	0	0
							C3		0	0	0	0	0	0	0	0	0
							C3orf38		0	0	0	0	0	0	0	0	0
							C5		0	0	0	0	0	0	0	0	0
							C6orf48		0	0	0	0	0	0	0	0	0
							C6orf57		0	0	0	0	0	0	0	0	0
							C8G		0	0	0	0	0	0	0	0	0
							C8orf4		0	0	0	0	0	0	0	0	0
							CADM1		0	0	0	0	0	0	0	0	0
							CALCOCO2		0	0	0	0	0	0	0	0	0
							CALM3		0	0	0	0	0	0	0	0	0
							CALR		0	0	0	0	0	0	0	0	0
							CAMK2D		0	0	0	1	0	0	0	0	0
							CANT1		0	0	0	0	0	0	0	0	0
							CANX		0	0	0	1	0	0	0	0	0
							CAPN1		0	0	0	0	0	0	0	0	0
							CAPN10		0	0	0	0	0	0	0	0	0
							CAPN2		0	0	0	0	0	0	0	0	0
							CAPNS1		0	0	0	0	0	0	0	0	0
							CAPRIN1		1	0	0	0	0	0	0	0	0
							CAPZA1		0	0	0	1	0	0	0	0	0
							CARD8		1	0	0	0	0	0	0	0	0
							CASD1		0	0	0	0	0	0	0	0	0
							CASP10		0	0	0	0	0	0	0	0	0
							CASP3		0	0	0	1	0	0	1	1	0
							CASP7		0	0	0	0	0	0	1	0	0
							CASP9		0	0	0	0	0	0	0	1	0
							CAV1		0	0	0	0	0	0	0	1	0
							CBS		0	0	0	0	0	0	0	0	0
							CBWD1		0	0	0	0	0	0	0	0	0
							CBX4		0	0	0	0	0	0	0	0	0
							CBX7		0	0	0	0	0	0	0	0	0
							CCDC64		0	0	0	0	0	0	0	0	0
							CCDC85B		1	0	0	0	0	0	0	0	0
							CCL1		0	0	0	0	0	0	0	0	0
							CCL13		0	0	0	0	0	0	0	0	0
							CCL8	intra+mi	0	0	0	0	0	0	0	0	0
							CCNA2		0	0	0	0	0	0	0	1	0
							CCND1		0	0	0	1	0	0	0	1	0
							CCNE1		0	0	0	0	0	0	0	0	0
							CCNG1		0	0	0	0	0	0	0	0	0
							CCNY		0	0	0	0	0	0	0	0	0
							CCP110		0	0	0	0	0	0	0	0	0
							CCR6		0	0	0	0	0	0	0	0	0
							CCT2		0	0	0	0	0	0	0	1	0
							CCT4		0	0	0	0	0	0	0	1	0
							CD151		1	0	0	0	0	0	0	0	0
							CD209		1	0	0	0	0	0	0	0	0
							CD244		0	0	0	0	0	0	0	0	0
							CD2BP2		0	0	0	0	0	0	0	0	0
							CD302		0	0	0	0	0	0	0	0	0
							CD37		0	0	0	0	0	0	0	0	0
							CD38		0	0	0	0	0	0	1	0	0
							CD3D		0	0	0	0	0	0	0	0	0
							CD3EAP		0	0	0	0	0	0	0	0	0
							CD3G		0	0	0	0	0	0	0	0	0
							CD40	intra+mi	0	0	0	1	1	0	1	1	0
							CD44		0	0	0	1	0	0	0	1	0
							CD74		0	0	0	0	0	1	1	0	0
							CD79B		0	0	0	0	0	0	0	0	0
							CDC16		0	0	0	0	0	0	0	0	0
							CDC25A		1	0	0	0	0	0	0	0	0
							CDC25B		1	0	0	0	0	0	0	0	0
							CDC37		0	0	0	0	0	0	0	0	0
							CDC42		0	0	0	1	0	0	0	1	0
							CDH1		0	0	0	0	0	0	0	1	0
							CDH11		0	0	0	0	0	0	0	0	0
							CDH6		0	0	0	0	0	0	0	0	0
							CDH8		0	0	0	0	0	0	0	0	0
							CDK1		0	0	0	0	0	0	0	1	0
							CDK19		0	0	0	0	0	0	0	0	0
							CDK2AP2		0	0	0	0	0	0	0	0	0
							CDK4		0	0	0	0	0	0	0	1	0
							CDK5		0	0	0	0	0	0	0	0	0
							CDK6		0	0	0	0	0	0	0	0	0
							CDK8		0	0	0	0	0	0	0	0	0
							CDK9		1	0	0	0	0	0	0	0	0
							CDKN1B		1	0	0	1	0	0	0	0	0
							CDX2		0	0	0	0	0	0	0	0	0
							CEBPD		0	0	0	1	0	0	0	0	0
							CENPJ		0	0	0	0	0	0	0	0	0
							CEP57		0	0	0	0	0	0	0	0	0
							CETP		0	0	0	0	0	0	0	0	0
							CFB		0	0	0	0	0	0	1	0	0
							CFL1	inter+mi	1	0	0	1	0	0	0	0	0
							CFLAR		0	0	0	0	0	0	0	0	0
							CGGBP1		0	0	0	0	0	0	0	0	0
							CHAC1		1	0	0	0	0	0	0	0	0
							CHD9		0	0	0	0	0	0	0	0	0
							CHID1		1	0	0	0	0	0	0	0	0
							CHP1		0	0	0	0	0	0	0	0	0
							CHSY1		0	0	0	0	0	0	0	0	0
							CHUK		0	0	0	1	0	0	0	0	0
							CIAO1		0	0	0	0	0	0	0	0	0
							CIAPIN1		0	0	0	0	0	0	0	0	0
							CIITA		0	0	0	1	0	0	1	0	0
							CIRBP		0	0	0	0	0	0	0	0	0
							CKAP4		0	0	0	0	0	0	0	0	0
							CLCF1		0	0	0	1	0	0	0	0	0
							CLCN7		0	0	0	0	0	0	0	0	0
							CLDN12		0	0	0	0	0	0	0	0	0
							CLDN16		0	0	0	0	0	0	0	0	0
							CLDN4		0	0	0	0	0	0	0	0	0
							CLDN7		0	0	0	0	0	0	0	0	0
							CLEC10A		0	0	0	0	0	0	0	0	0
							CLEC5A		0	0	0	0	1	0	0	0	0
							CLIC4		0	0	0	0	0	0	0	0	0
							CLIP1		0	0	0	0	0	0	0	0	0
							CLN3		0	1	0	0	0	0	0	0	0
							CLN8		0	1	0	0	0	0	0	0	0
							CLSTN1		0	0	0	0	0	0	0	0	0
							CMTM4		0	0	0	0	0	0	0	0	0
							CNBP		1	0	0	0	0	0	0	0	0
							CNOT8		1	0	0	0	0	0	0	0	0
							CNTNAP2		0	0	0	0	0	0	0	0	0
							CNTRL		0	0	0	0	0	0	0	0	0
							COBRA1		1	0	0	0	0	0	0	0	0
							COCH		0	0	0	0	0	0	0	0	0
							COIL		0	0	0	0	0	0	0	0	0
							COL13A1		0	0	0	0	0	0	0	0	0
							COL18A1		1	1	0	0	0	0	0	0	0
							COL1A1		0	0	0	0	0	0	0	0	0
							COL3A1		0	0	0	0	0	0	0	0	0
							COL4A1		1	0	0	0	0	0	0	0	0
							COL9A2		0	0	0	0	0	0	0	0	0
							COLEC12		0	0	0	0	0	0	0	0	0
							COMMD2		0	0	0	0	0	0	0	0	0
							COMMD7		0	0	0	0	0	0	0	0	0
							COMMD9		0	0	0	0	0	0	0	0	0
							COPS8		0	0	0	0	0	0	0	0	0
							COQ7		0	0	0	0	0	0	0	0	0
							CORO1B		0	0	0	0	0	0	0	0	0
							CORO7		0	0	0	0	0	0	0	0	0
							COTL1		1	0	0	0	0	0	0	0	0
							COX6B1		0	0	0	0	0	0	0	0	0
							COX7C		0	0	0	0	0	0	0	0	0
							CPS1		0	0	0	0	0	0	0	0	0
							CRCP		0	0	0	0	0	0	0	0	0
							CRIM1		0	0	0	0	0	0	0	0	0
							CRISPLD2		1	1	0	0	0	0	0	0	0
							CRK	DB+mi	0	0	0	1	0	0	0	0	0
							CRKL	inter+mi	1	0	0	1	0	0	0	0	0
							CRLF3		0	0	0	0	0	0	0	0	0
							CRTAP		0	0	0	0	0	0	0	0	0
							CS		0	0	0	0	0	0	0	0	0
							CSDE1		0	0	0	0	0	0	0	0	0
							CSK		1	0	0	1	0	0	0	0	0
							CSNK2A1		1	0	0	0	0	0	0	0	0
							CSNK2B		0	0	0	0	0	0	0	0	0
							CSRNP3		0	0	0	0	0	0	0	0	0
							CTBP2		0	0	0	0	0	0	0	0	0
							CTDSPL2		0	0	0	0	0	0	0	0	0
							CTF1		1	0	0	1	0	0	0	0	0
							CTNND2		0	0	0	0	0	0	0	0	0
							CTSA	inter+mi	0	0	0	0	0	0	0	0	0
							CTSF		0	0	0	0	0	0	0	0	0
							CTSW		1	0	0	0	0	0	0	0	0
							CUBN		0	0	0	0	0	0	0	0	0
							CUL4A		0	0	0	0	0	0	0	0	0
							CUL5		0	0	0	1	0	0	0	0	0
							CUL7		0	0	0	0	0	0	0	0	0
							CUTA		0	0	0	0	0	0	0	0	0
							CXCL12		0	0	0	0	0	0	0	0	0
							CXCL5		0	0	0	0	0	0	0	0	0
							CXCL6		0	0	0	0	1	0	0	0	0
							CXCR4		0	0	0	0	0	0	0	1	0
							CYCS		0	0	0	0	0	0	0	1	0
							CYFIP2		1	0	0	0	0	0	0	0	0
							CYLD		0	0	0	0	0	0	0	0	0
							CYP1A1		1	0	0	0	0	0	0	0	0
							CYTH1		0	0	0	0	0	0	0	0	0
							DAG1		1	0	0	0	0	0	0	0	0
							DAND5		0	0	0	0	0	0	0	0	0
							DAP3		0	0	0	0	0	0	0	0	0
							DAPK2		0	0	0	0	0	0	0	0	0
							DAPP1		0	0	0	0	0	0	0	0	0
							DAZAP1	inter+mi	1	0	0	0	0	0	0	0	0
							DBNL		0	0	0	0	0	0	0	0	0
							DBP		0	0	0	0	0	0	0	0	0
							DCSTAMP		0	0	0	0	0	0	0	0	0
							DCTD		0	0	0	0	0	0	0	0	0
							DDA1		0	0	0	0	0	0	0	0	0
							DDB1		0	0	0	0	0	0	0	0	0
							DDR1		0	0	0	0	0	0	0	0	0
							DDT		0	0	0	0	0	0	0	0	0
							DDX19B		0	0	0	0	0	0	0	0	0
							DDX21		0	0	0	0	0	0	0	0	0
							DDX27		0	0	0	0	0	0	0	0	0
							DDX39B		1	0	0	0	0	0	0	0	0
							DDX42		0	0	0	0	0	0	0	0	0
							DDX5		1	0	0	0	0	0	0	0	0
							DEFA5		0	0	0	0	0	0	0	0	0
							DEGS1		0	0	0	0	0	0	0	0	0
							DGKB		0	1	0	0	0	0	0	0	0
							DGKE		0	0	0	0	0	0	0	0	0
							DGKI		0	0	0	0	0	0	0	0	0
							DHX33		0	0	0	0	0	0	0	0	0
							DIDO1		0	0	0	0	0	0	0	0	0
							DLEU2		0	0	0	0	0	0	0	0	0
							DLX1		1	0	0	0	0	0	0	0	0
							DMRTB1		0	0	0	0	0	0	0	0	0
							DNAJA1		1	0	0	0	0	0	0	0	0
							DNAJA3		0	0	0	0	0	0	0	0	0
							DNAJB13		0	0	0	0	0	0	0	0	0
							DNAJB9		0	0	0	0	0	0	0	0	0
							DNAJC10		0	0	0	0	0	0	0	0	0
							DNAJC5	inter+mi	1	0	0	0	0	0	0	0	0
							DNAJC9		0	0	0	0	0	0	0	0	0
							DNASE2		0	0	0	0	0	0	0	0	0
							DNMT1		0	0	0	0	0	0	0	0	0
							DNPEP		0	0	0	0	0	0	0	0	0
							DOCK11		0	0	0	0	0	0	0	0	0
							DOCK4		0	0	0	0	0	0	0	0	0
							DOCK5		0	0	0	0	0	0	0	0	0
							DOK2		0	0	0	0	0	0	0	0	0
							DPF2		1	0	0	0	0	0	0	0	0
							DPM3		1	0	0	0	0	0	0	0	0
							DPP8		0	0	0	0	0	0	0	0	0
							DPYSL2	DB+mi	0	0	0	0	0	0	0	0	0
							DRD1		0	0	0	0	0	0	0	0	0
							DSC2		0	0	0	0	0	0	0	0	0
							DST		0	0	0	0	0	0	0	0	0
							DSTN		0	0	0	0	0	0	0	0	0
							DUS1L		0	0	0	0	0	0	0	0	0
							DUSP10		0	0	0	0	0	0	0	0	0
							DUSP4		0	0	0	1	0	0	0	0	0
							DUSP7		0	0	0	1	0	0	0	0	0
							DUT		0	0	0	0	0	0	0	0	0
							DYNLT3		0	0	0	0	0	0	0	0	0
							DYRK1A		0	0	0	0	0	0	0	0	0
							DYRK2		0	0	0	0	0	0	0	0	0
							E2F1		0	0	0	0	0	0	0	0	0
							E2F2		0	0	0	0	0	0	0	0	0
							E2F3		0	0	0	0	0	0	0	0	0
							E2F6		0	0	0	0	0	0	0	0	0
							E4F1		1	0	0	0	0	0	0	0	0
							EBAG9		0	0	0	0	0	0	0	0	0
							ECE1		0	0	0	0	0	0	0	0	0
							ECH1		0	0	0	0	0	0	0	0	0
							ECT2		0	0	0	0	0	0	0	0	0
							EDNRA		0	0	0	0	0	0	0	0	0
							EEF2		0	0	0	0	0	0	0	1	0
							EEF2K		0	0	0	0	0	0	0	0	0
							EFEMP2		1	0	0	0	0	0	0	0	0
							EFNA1	inter+mi	1	0	0	0	0	0	0	0	0
							EFS		0	0	0	0	0	0	0	0	0
							EFTUD2		0	0	0	0	0	0	0	1	0
							EGLN1		0	0	0	0	0	0	0	0	0
							EGLN3		0	0	0	0	0	0	0	0	0
							EHD1		0	0	0	0	0	0	0	0	0
							EHMT1		1	0	0	0	0	0	0	0	0
							EHMT2		0	0	0	0	0	0	0	0	0
							EIF2AK1		0	0	0	0	0	0	0	0	0
							EIF2S3		0	0	0	0	0	0	0	0	0
							EIF3M		0	0	0	0	0	0	0	0	0
							EIF4B		0	1	0	0	0	0	0	0	0
							EIF4E		0	0	0	1	0	0	0	0	0
							EIF4EBP2		0	0	0	0	0	0	0	0	0
							EIF5AL1		0	0	0	0	0	0	0	0	0
							ELAVL1	intra+mi	0	0	0	0	0	0	0	0	0
							ELK1		0	0	0	1	0	0	0	0	0
							ELK3		0	0	0	0	0	0	0	0	0
							ELL		0	0	0	0	0	0	0	0	0
							ELMO2		0	0	0	0	0	0	0	0	0
							ELMO3		1	0	0	0	0	0	0	0	0
							EMB		0	0	0	0	0	0	0	0	0
							EMG1		0	0	0	0	0	0	0	0	0
							EMR2		0	0	0	0	0	0	0	0	0
							EN2		0	0	0	0	0	0	0	0	0
							ENC1		0	0	0	0	0	0	0	0	0
							ENO2		1	0	0	0	0	0	0	0	0
							ENTPD1	DB+intra+mi	0	0	0	0	0	0	0	0	0
							ENTPD2		1	0	0	0	0	0	0	0	0
							ENTPD6		0	0	0	0	0	0	0	0	0
							EPHA2		0	0	0	0	0	0	0	0	0
							EPN1		1	0	0	0	0	0	0	0	0
							EPRS		0	0	0	0	0	0	0	1	0
							ERAP2		0	0	0	0	0	0	0	0	0
							ERBB2		1	0	0	0	0	0	0	1	0
							ERC1		0	1	0	0	0	0	0	0	0
							ERCC1		0	0	0	0	0	0	0	0	0
							ERCC8		0	0	0	0	0	0	0	0	0
							ERN1		0	0	0	0	0	0	0	0	0
							ERRFI1		0	0	0	0	0	0	0	0	0
							ESD		0	0	0	0	0	0	0	0	0
							ESPL1		0	0	0	0	0	0	0	0	0
							ESR2		0	0	0	0	0	0	0	0	0
							ESRRA		0	0	0	0	0	0	0	0	0
							ETNK1		0	0	0	0	0	0	0	0	0
							ETS1		0	0	0	0	0	0	0	0	0
							EXO1		0	0	0	0	0	0	0	0	0
							EXOC3		1	0	0	0	0	0	0	0	0
							EXOC3L1		1	0	0	0	0	0	0	0	0
							EXOSC10		0	0	0	0	0	0	0	0	0
							F11R		0	0	0	0	0	0	0	0	0
							F2		0	0	0	0	0	0	0	0	0
							F2RL1		0	0	0	0	0	0	0	0	0
							F3		0	0	0	0	1	0	0	0	0
							FADD		0	0	0	0	0	0	0	0	0
							FAF1		0	0	0	0	0	0	0	0	0
							FAF2		1	0	0	0	0	0	0	0	0
							FAHD1		0	0	0	0	0	0	0	0	0
							FAM3D		1	1	0	0	0	0	0	0	0
							FAM82A2		0	0	0	0	0	0	0	0	0
							FANCA		0	0	0	0	0	0	0	0	0
							FANCC		0	0	0	0	0	0	0	0	0
							FANCD2		0	0	0	0	0	0	0	0	0
							FANCE		0	0	0	0	0	0	0	0	0
							FANCG		1	0	0	0	0	0	0	0	0
							FANCI		0	0	0	0	0	0	0	0	0
							FANCM		0	0	0	0	0	0	0	0	0
							FAS		0	0	0	0	0	0	1	0	0
							FASTK	inter+mi	1	0	0	0	0	0	0	0	0
							FASTKD1		0	0	0	0	0	0	0	0	0
							FASTKD5		1	0	0	0	0	0	0	0	0
							FAT3		0	0	0	0	0	0	0	0	0
							FAU		0	0	0	0	0	0	0	0	0
							FBLN1		0	0	0	0	0	0	0	0	0
							FBLN5		1	0	0	0	0	0	0	0	0
							FBXL16		1	0	0	0	0	0	0	0	0
							FBXO21		0	1	0	0	0	0	0	0	0
							FBXO5		0	0	0	0	0	0	0	0	0
							FBXW11		1	0	0	1	0	0	0	0	0
							FBXW5		0	0	0	0	0	0	0	0	0
							FCGRT		0	0	0	0	0	0	0	0	0
							FCHSD1		1	0	0	0	0	0	0	0	0
							FDFT1		0	0	0	0	0	0	0	0	0
							FEM1B		0	0	0	0	0	0	0	0	0
							FEM1C		0	0	0	0	0	0	0	0	0
							FEN1		0	0	0	0	0	0	0	0	0
							FERMT3		0	0	0	0	0	0	0	0	0
							FEZF2		0	0	0	0	0	0	0	0	0
							FFAR2		1	0	0	0	1	0	0	0	0
							FGB		0	0	0	0	0	0	0	0	0
							FGF1		0	0	0	0	0	0	0	0	0
							FGF10		0	0	0	0	0	0	0	0	0
							FGF2		0	0	0	1	0	0	0	1	0
							FGF22		1	0	0	0	0	0	0	0	0
							FGF9		0	0	0	0	0	0	0	0	0
							FGG		0	0	0	0	0	0	0	0	0
							FKBP15		0	0	0	0	0	0	0	0	0
							FKBP2		0	0	0	0	0	0	0	0	0
							FKBP4		0	0	0	0	0	0	0	0	0
							FKBP5		0	0	0	0	0	0	0	0	0
							FLNA		0	0	0	1	0	0	0	0	0
							FLOT1		0	0	0	0	0	0	0	0	0
							FLRT1		0	0	0	0	0	0	0	0	0
							FLT3		0	1	0	1	0	0	0	0	0
							FLT3LG		0	0	0	1	0	0	0	0	0
							FLVCR1		0	0	0	0	0	0	0	0	0
							FOS		0	0	0	1	0	0	0	1	0
							FOSL1		1	0	0	0	0	0	0	0	0
							FOXA1		0	0	0	0	0	0	0	0	0
							FOXC1		0	0	0	0	0	0	0	0	0
							FOXH1		0	0	0	0	0	0	0	0	0
							FOXK2		1	0	0	0	0	0	0	0	0
							FOXO3		0	0	0	1	0	0	0	1	0
							FRK		0	0	0	0	0	0	0	0	0
							FRS2		0	0	0	0	0	0	0	0	0
							FSTL3	inter+mi	1	0	0	0	0	0	0	0	0
							FURIN		0	0	0	0	0	0	0	0	0
							FUT4		0	0	0	0	0	0	0	0	0
							FUT7	inter+intra	1	0	0	0	0	0	0	0	0
							FXN		0	0	0	0	0	0	0	0	0
							FXR1		0	0	0	0	0	0	0	0	0
							FXYD5		0	0	0	0	0	0	0	0	0
							FZD1		0	0	0	0	0	0	0	0	0
							FZD5		0	0	0	0	1	0	0	0	0
							G3BP1		0	0	0	0	0	0	0	0	0
							G6PD		0	0	0	0	0	0	0	0	0
							GADD45A		0	0	0	0	0	0	0	0	0
							GALC		1	0	0	0	0	0	0	0	0
							GALNT1		0	0	0	0	0	0	0	0	0
							GALNT2		1	1	0	0	0	0	0	0	0
							GALR1		0	0	0	0	0	0	0	0	0
							GAPVD1		0	0	0	0	0	0	0	0	0
							GATA6		1	0	0	0	0	0	0	0	0
							GCA		0	0	0	0	0	0	0	0	0
							GCC2		0	0	0	0	0	0	0	0	0
							GCNT3		0	0	0	0	0	0	0	0	0
							GDF11		0	0	0	0	0	0	0	0	0
							GDF15		0	0	0	0	0	0	0	0	0
							GDF5		0	0	0	0	0	0	0	0	0
							GDI2		0	0	0	0	0	0	0	0	0
							GDNF		0	0	0	0	0	0	0	0	0
							GGA1		1	0	0	0	0	0	0	0	0
							GGA2		0	0	0	0	0	0	0	0	0
							GGCX		0	0	0	0	0	0	0	0	0
							GHSR		0	0	0	0	0	0	0	0	0
							GJA1		0	0	0	0	0	0	0	0	0
							GLO1		0	0	0	0	0	0	0	0	0
							GLRX5	intra+mi	1	0	0	0	0	0	0	0	0
							GLS		0	0	0	0	0	0	0	0	0
							GLT25D1		0	0	0	0	0	0	0	0	0
							GLUD1		0	0	0	0	0	0	0	0	0
							GMCL1		0	0	0	0	0	0	0	0	0
							GML		0	0	0	0	0	0	0	0	0
							GMPS		0	1	0	0	0	0	0	0	0
							GNA12		0	0	0	0	0	0	0	0	0
							GNAI3		0	0	0	0	1	0	0	0	0
							GNB2		0	0	0	0	0	0	0	0	0
							GNE		0	0	0	0	0	0	0	0	0
							GP2		0	1	0	0	0	0	0	0	0
							GPANK1		0	0	0	0	0	0	0	0	0
							GPI		0	0	0	0	0	0	0	0	0
							GPR107		1	0	0	0	0	0	0	0	0
							GPR35		0	0	0	0	0	0	0	0	0
							GPSM2		0	0	0	0	0	0	0	0	0
							GPX1		0	0	0	0	0	0	0	0	0
							GRAMD4		1	0	0	0	0	0	0	0	0
							GRAP2		0	0	0	1	0	0	0	0	0
							GRB2		1	0	0	1	0	0	0	1	0
							GREM2		0	0	0	0	0	0	0	0	0
							GRIN1		1	0	0	0	0	0	0	0	0
							GRINA		1	0	0	0	0	0	0	0	0
							GRSF1		0	0	0	0	0	0	0	0	0
							GSK3B		0	0	0	0	0	0	0	1	0
							GSR		0	0	0	0	0	0	0	0	0
							GSS		0	0	0	0	0	0	0	0	0
							GSTK1		0	0	0	0	0	0	0	0	0
							GTDC1		0	0	0	0	0	0	0	0	0
							GUK1		0	0	0	0	0	0	0	0	0
							GZMM		1	0	0	0	0	0	0	0	0
							HACE1		0	0	0	0	0	0	0	0	0
							HAPLN1		0	0	0	0	0	0	0	0	0
							HAPLN2		0	0	0	0	0	0	0	0	0
							HARS		0	0	0	0	0	0	0	0	0
							HAX1		0	0	0	0	0	0	0	0	0
							HCFC1		0	0	0	0	0	0	0	0	0
							HDAC4		1	1	0	0	0	0	0	0	0
							HDAC7		1	0	0	0	0	0	0	0	0
							HDLBP	inter+mi	0	0	0	0	0	0	0	0	0
							HEATR3		0	0	0	0	0	0	0	0	0
							HEATR5B		0	0	0	0	0	0	0	0	0
							HELLS		0	0	0	0	0	0	0	0	0
							HERC1		0	0	0	0	0	0	0	0	0
							HERPUD1		0	0	0	0	0	0	0	0	0
							HES1		0	0	0	0	0	0	0	0	0
							HEXIM1		0	0	0	0	0	0	0	0	0
							HHEX		0	0	0	0	0	0	0	0	0
							HIF1AN		0	0	0	0	0	0	0	0	0
							HIP1R		1	0	0	0	0	0	0	0	0
							HIPK1		1	0	0	0	0	0	0	0	0
							HIPK3		0	0	0	0	0	0	0	0	0
							HIST1H3D		0	0	0	0	0	0	0	0	0
							HIVEP1		0	0	0	0	0	0	0	0	0
							HLA-DMA		0	0	0	0	0	0	1	0	0
							HLA-DMB		0	0	0	0	0	0	0	0	0
							HLA-DOA		0	0	0	0	0	0	0	0	0
							HLA-E		0	0	0	1	0	0	0	0	0
							HM13		0	0	0	0	0	0	0	0	0
							HMGA1		0	0	0	0	0	0	0	0	0
							HMGB1		1	0	0	1	0	0	0	0	0
							HMGB2		0	0	0	0	0	0	0	0	0
							HMGN1		0	0	0	0	0	0	0	0	0
							HMGN2		1	1	0	0	0	0	0	0	0
							HMGN4		0	0	0	0	0	0	0	0	0
							HMHA1		1	0	0	0	0	0	0	0	0
							HMOX1		0	0	0	1	0	0	0	0	0
							HN1L		1	0	0	0	0	0	0	0	0
							HNRNPL		0	0	0	0	0	0	0	0	0
							HNRPDL		0	0	0	0	0	0	0	0	0
							HOXA13		0	0	0	0	0	0	0	0	0
							HOXA3		0	0	0	0	0	0	0	0	0
							HOXB4		0	0	0	0	0	0	0	0	0
							HOXD10		0	0	0	0	0	0	0	0	0
							HPRT1		0	0	0	0	0	0	0	0	0
							HPSE		0	0	0	0	0	0	0	0	0
							HRG		0	0	0	0	0	0	0	0	0
							HRH2		0	0	0	0	0	0	0	0	0
							HS2ST1		0	0	0	0	0	0	0	0	0
							HSD11B2		0	0	0	0	0	0	0	0	0
							HSP90AB1		0	0	0	0	0	0	0	1	0
							HSPA1B		1	0	0	0	0	0	0	0	0
							HSPA1L		1	0	0	0	0	0	0	0	0
							HSPA6		0	0	0	0	0	0	0	0	0
							HSPBP1		0	0	0	0	0	0	0	0	0
							HSPD1		0	0	0	0	0	0	0	0	0
							IBTK		0	0	0	0	0	0	0	0	0
							ICA1L		0	0	0	0	0	0	0	0	0
							ICAM2		0	0	0	0	0	0	0	0	0
							ICOSLG	inter+mi	0	0	0	0	1	0	0	0	0
							IDE		0	0	0	0	0	0	0	0	0
							IDH3A		0	0	0	0	0	0	0	0	0
							IDI1		0	0	0	0	0	0	0	0	0
							IER3		0	0	0	0	0	0	0	0	0
							IER3IP1		0	0	0	0	0	0	0	0	0
							IFIT2		0	0	0	1	0	1	1	0	0
							IFITM1		0	0	0	1	1	1	0	0	0
							IFNAR1		0	0	0	1	1	0	0	0	0
							IFNAR2	DB+intra+mi	0	0	0	1	0	0	1	0	0
							IFNE		0	0	0	0	0	0	0	0	0
							IFT122		0	0	0	0	0	0	0	0	0
							IFT140		0	0	0	0	0	0	0	0	0
							IGDCC4		0	0	0	0	0	0	0	0	0
							IGF1R		0	0	0	0	0	0	0	1	0
							IGF2BP1		0	0	0	0	0	0	0	0	0
							IGSF3		0	0	0	0	0	0	0	0	0
							IGSF8		0	0	0	0	0	0	0	0	0
							IKZF3		1	0	0	0	0	0	0	0	0
							IL10RB		0	0	0	1	0	0	0	0	0
							IL12RB2		0	0	0	1	0	0	0	0	0
							IL15		0	0	0	1	1	1	1	0	0
							IL17RD		0	0	0	0	0	0	0	0	0
							IL17REL		1	0	0	0	0	0	0	0	0
							IL1A		0	0	0	1	1	0	0	0	0
							IL1B		0	0	0	1	1	0	0	1	0
							IL20RB		0	0	0	1	0	0	0	0	0
							IL21R		0	0	0	1	0	0	0	0	0
							IL2RA		0	0	0	1	0	0	0	0	0
							IL3		0	0	0	1	0	0	0	0	0
							IL32		1	0	0	1	0	0	0	0	0
							IL6R	intra+mi	0	0	0	1	0	0	0	0	0
							IL6ST		0	0	0	1	0	0	0	0	0
							ILF2		0	0	0	0	0	0	0	0	0
							ILF3		0	0	0	0	0	0	0	0	0
							IMPDH2		0	0	0	0	0	0	0	0	0
							INSIG1		0	0	0	0	0	0	0	0	0
							IP6K1		0	0	0	0	0	0	0	0	0
							IPO7		0	0	0	0	0	0	0	0	0
							IPO9		0	0	0	0	0	0	0	0	0
							IRAK1		0	0	0	1	0	0	0	0	0
							IRF1		0	1	0	1	1	1	1	0	0
							IRGQ		0	0	0	0	0	0	0	0	0
							IRS1		0	0	0	1	0	0	0	1	0
							IRS2		0	0	0	1	0	0	0	0	0
							ITFG3		1	0	0	0	0	0	0	0	0
							ITGA1		0	0	0	0	0	0	0	0	0
							ITGA10	inter+mi	0	1	0	0	0	0	0	0	0
							ITGA6		0	0	0	0	0	0	0	0	0
							ITGA9		0	0	0	0	0	0	0	0	0
							ITGB2		0	0	0	1	0	0	0	0	0
							ITGB3BP		0	0	0	0	0	0	0	0	0
							ITK		1	0	0	0	0	0	0	0	0
							ITPR2		1	0	0	0	0	0	0	0	0
							JAGN1		0	0	0	0	0	0	0	0	0
							JAK3		0	0	0	1	0	0	0	0	0
							JAKMIP3		0	0	0	0	0	0	0	0	0
							JARID2		0	0	0	0	0	0	0	0	0
							JMJD1C		0	0	0	0	0	0	0	0	0
							JMY		0	0	0	0	0	0	0	0	0
							JTB		0	0	0	0	0	0	0	0	0
							KAT6A		0	0	0	0	0	0	0	0	0
							KCNK5		0	0	0	0	0	0	0	0	0
							KIAA0040		0	0	0	0	0	0	0	0	0
							KIAA0100		0	0	0	0	0	0	0	0	0
							KIAA1549L		0	0	0	0	0	0	0	0	0
							KIF1B		0	0	0	0	1	0	0	0	0
							KIR3DX1		0	0	0	0	0	0	0	0	0
							KIT		0	1	0	0	0	0	0	1	0
							KLF10		0	0	0	0	0	0	0	0	0
							KLF3		1	0	0	0	0	0	0	0	0
							KLF6		0	0	0	0	1	0	0	0	0
							KLF9		1	1	0	0	0	0	0	0	0
							KLHDC3		0	0	0	0	0	0	0	0	0
							KLHL22		0	0	0	0	0	0	0	0	0
							KLK3		0	0	0	0	0	0	0	0	0
							KLRD1		0	0	0	0	0	0	0	0	0
							KPNA2		0	0	0	1	0	0	0	0	0
							KPNA6		1	0	0	0	0	0	0	0	0
							KPNB1		0	0	0	1	0	0	0	0	0
							LAG3		0	0	0	0	0	0	0	0	0
							LAMB1		0	0	0	0	0	0	0	0	0
							LAMC1		0	0	0	0	0	0	0	0	0
							LAMC2		0	0	0	0	0	0	0	0	0
							LAMP1		0	0	0	0	0	0	0	0	0
							LAMP2		0	0	0	0	0	0	0	0	0
							LANCL1		0	0	0	0	0	0	0	0	0
							LARP1		1	0	0	0	0	0	0	0	0
							LARS		1	1	0	0	0	0	0	0	0
							LBR		0	0	0	0	0	0	0	0	0
							LDHA		0	0	0	0	0	0	0	0	0
							LDHB		0	0	0	0	0	0	0	0	0
							LDLR		0	0	0	0	1	0	0	0	0
							LEF1		0	0	0	0	0	0	0	0	0
							LGALS3BP		0	0	0	0	0	1	1	0	0
							LIFR		0	0	0	1	0	0	0	0	0
							LILRA2		0	0	0	0	0	0	0	0	0
							LIMS1		0	0	0	0	0	0	0	0	0
							LIN7B		0	0	0	0	0	0	0	0	0
							LIPA		0	0	0	0	0	0	0	0	0
							LITAF		0	0	0	0	0	0	0	0	0
							LMAN1		0	0	0	0	0	0	0	0	0
							LMNB1		0	0	0	1	0	0	0	0	0
							LONP2		0	1	0	0	0	0	0	0	0
							LPAR1		0	0	0	0	1	0	0	0	0
							LPP		0	1	0	0	0	0	0	0	0
							LRG1		1	0	0	0	0	0	0	0	0
							LRIG2		0	0	0	0	0	0	0	0	0
							LRP1		0	0	0	0	0	0	0	0	0
							LRP3		0	0	0	0	0	0	0	0	0
							LRP5		1	0	0	0	0	0	0	0	0
							LRP6		0	0	0	0	0	0	0	0	0
							LRPAP1		0	0	0	0	0	0	0	0	0
							LRR1		0	0	0	0	0	0	0	0	0
							LRRC40		0	0	0	0	0	0	0	0	0
							LRRC47		1	0	0	0	0	0	0	0	0
							LRRC8A	inter+mi	0	0	0	0	0	0	0	0	0
							LRRC8E		0	0	0	0	0	0	0	0	0
							LRRFIP1		0	0	0	0	0	0	0	0	0
							LRSAM1		0	0	0	0	0	0	0	0	0
							LSM1		0	0	0	0	0	0	0	0	0
							LST1		1	0	0	0	0	0	0	0	0
							LTA		1	0	0	1	1	0	0	0	0
							LTB		1	0	0	1	0	0	0	0	0
							LTK		0	0	0	0	0	0	0	0	0
							LUC7L2		0	0	0	0	0	0	0	0	0
							LY6G5B		0	0	0	0	0	0	0	0	0
							LYN		0	0	0	1	1	0	0	1	0
							LYRM2		0	0	0	0	0	0	0	0	0
							LYVE1		0	0	0	0	0	0	0	0	0
							MADCAM1		1	0	0	0	0	0	0	0	0
							MAEA		0	0	0	0	0	0	0	0	0
							MAFG		1	0	0	0	0	0	0	0	0
							MAP2K2		0	0	0	0	0	0	0	0	0
							MAP2K5		0	0	0	0	0	0	0	0	0
							MAP2K7		0	0	0	1	0	0	0	1	0
							MAP3K1		0	0	0	0	0	0	0	0	0
							MAP3K2		0	0	0	0	0	0	0	0	0
							MAP3K3		1	0	0	1	0	0	0	0	0
							MAP4K2		0	0	0	0	0	0	0	0	0
							MAPK11		1	0	0	1	0	0	0	0	0
							MAPK12		1	0	0	0	0	0	0	0	0
							MAPK14		0	0	0	1	0	0	0	1	0
							MAPK8		0	0	0	1	0	0	0	1	0
							MAPK8IP3	inter+mi	1	0	0	0	0	0	0	0	0
							MAPK9		0	0	0	1	0	0	0	0	0
							MAPKAPK2		0	0	0	1	0	0	0	0	0
							MAPKAPK5		0	0	0	0	0	0	0	0	0
							MARCH1		0	0	0	0	0	0	0	0	0
							MARK2		0	0	0	0	0	0	0	0	0
							MARK3		0	0	0	0	0	0	0	0	0
							MAT2A		0	0	0	0	0	0	0	0	0
							MATR3		0	0	0	0	0	0	0	0	0
							MAVS		0	0	0	0	0	0	0	0	0
							MAX		0	0	0	0	0	0	0	0	0
							MAZ		0	0	0	0	0	0	0	0	0
							MBD4		0	0	0	0	0	0	0	0	0
							MBTPS1		0	0	0	0	0	0	0	0	0
							MC1R		0	0	0	0	0	0	0	0	0
							MCAM		1	0	0	0	0	0	0	0	0
							MCFD2		0	0	0	0	0	0	0	0	0
							MCL1		0	0	0	1	0	0	0	0	0
							MCM5		0	0	0	0	0	0	0	0	0
							MCM7		0	0	0	0	0	0	0	0	0
							MCTS1		0	0	0	0	0	0	0	0	0
							MDC1		0	0	0	0	0	0	0	0	0
							MDFI		0	0	0	0	0	0	0	0	0
							MDH2		0	0	0	0	0	0	0	0	0
							MDM2		0	0	0	0	0	0	0	1	0
							MDM4		1	0	0	0	0	0	0	0	0
							MEA1		0	0	0	0	0	0	0	0	0
							MED28		1	0	0	0	0	0	0	0	0
							MEF2C		0	0	0	1	0	0	0	0	0
							MEF2D		1	0	0	0	0	0	0	0	0
							METTL13		0	0	0	0	0	0	0	0	0
							METTL14		0	0	0	0	0	0	0	0	0
							MFN2		0	0	0	0	0	0	0	0	0
							MFSD10		0	0	0	0	0	0	0	0	0
							MGAM		1	0	0	0	0	0	0	0	0
							MIA3		0	0	0	0	0	0	0	0	0
							MIB1		0	0	0	0	0	0	0	0	0
							MICALL2		0	0	0	0	0	0	0	0	0
							MICB		0	0	0	0	0	0	0	0	0
							MIF		1	0	0	1	0	0	0	0	0
							MIF4GD		0	0	0	0	0	0	0	0	0
							MIR126		1	1	0	0	0	0	0	0	0
							MIR141		1	0	0	0	0	0	0	0	0
							MIR200C		1	0	0	0	0	0	0	0	0
							MIR328		1	0	0	0	0	0	0	0	0
							MITF		0	0	0	0	0	0	0	0	0
							MKI67		0	0	0	0	0	0	0	0	0
							MKKS		0	0	0	0	0	0	0	0	0
							MKLN1		1	0	0	0	0	0	0	0	0
							MKNK2		0	0	0	0	0	0	0	0	0
							MLF2		1	0	0	0	0	0	0	0	0
							MLLT10		0	1	0	0	0	0	0	0	0
							MLST8		1	0	0	0	0	0	0	0	0
							MMD		0	0	0	0	0	0	0	0	0
							MMP2		0	1	0	1	0	0	0	0	0
							MMP9		0	0	0	1	0	0	0	1	0
							MOAP1		0	0	0	0	0	0	0	0	0
							MOG		0	0	0	0	0	0	0	0	0
							MORF4L2		0	0	0	0	0	0	0	0	0
							MRPL10		0	0	0	0	0	0	0	0	0
							MRPL19		0	1	0	0	0	0	0	0	0
							MRPL32		0	0	0	0	0	0	0	0	0
							MRPL41		1	0	0	0	0	0	0	0	0
							MRPS10		0	0	0	0	0	0	0	0	0
							MRPS23		0	0	0	0	0	0	0	0	0
							MRPS34	inter+mi	0	0	0	0	0	0	0	0	0
							MS4A4A		0	0	0	0	0	0	0	0	0
							MSH3		0	0	0	0	0	0	0	0	0
							MSH6		0	0	0	0	0	0	0	0	0
							MSLN		1	1	0	0	0	0	0	0	0
							MT2A		0	0	0	1	0	0	1	0	0
							MTA1		1	0	0	0	0	0	0	0	0
							MTDH		0	0	0	0	0	0	0	0	0
							MTFP1		1	0	0	0	0	0	0	0	0
							MTO1		0	0	0	0	0	0	0	0	0
							MTOR		0	0	0	0	0	0	0	1	0
							MTSS1		0	0	0	0	0	0	0	0	0
							MUM1		0	0	0	0	0	0	0	0	0
							MVK		0	0	0	0	0	0	0	0	0
							MYB		0	0	0	0	0	0	0	0	0
							MYBL1		0	0	0	0	0	0	0	0	0
							MYEOV		0	0	0	0	0	0	0	0	0
							MYH10		0	0	0	0	0	0	0	0	0
							MYH2		0	0	0	0	0	0	0	0	0
							MYH9		0	0	0	0	0	0	0	0	0
							MYLK		0	1	0	0	0	0	0	0	0
							MYLPF		0	0	0	0	0	0	0	0	0
							MYO18A	inter+mi	0	0	0	0	0	0	0	0	0
							MYO1C		0	0	0	0	0	0	0	0	0
							MYO5A		1	0	0	0	0	0	0	0	0
							MYO6		0	0	0	0	0	0	0	0	0
							NACC1		0	0	0	0	0	0	0	0	0
							NAGA		1	0	0	0	0	0	0	0	0
							NARS		0	0	0	0	0	0	0	0	0
							NAV1		0	0	0	0	0	0	0	0	0
							NCBP2		0	0	0	0	0	0	0	0	0
							NCK2		0	0	0	0	0	0	0	0	0
							NCKAP1		0	0	0	0	0	0	0	0	0
							NCKAP1L		0	0	0	0	0	0	0	0	0
							NCL		0	0	0	0	0	0	0	1	0
							NCOA6		0	0	0	0	0	0	0	0	0
							NCR3		1	0	0	0	0	0	0	0	0
							NDST1		1	0	0	0	0	0	0	0	0
							NDUFA4		0	0	0	0	0	0	0	0	0
							NDUFB5		1	0	0	0	0	0	0	0	0
							NDUFS6		0	0	0	0	0	0	0	0	0
							NDUFS7		0	0	0	0	0	0	0	0	0
							NDUFS8		1	0	0	0	0	0	0	0	0
							NEBL		0	0	0	0	0	0	0	0	0
							NEIL2		0	0	0	0	0	0	0	0	0
							NEK6		0	0	0	0	0	0	0	0	0
							NEU1		0	0	0	0	0	0	0	0	0
							NF1		0	0	0	0	0	0	0	0	0
							NF2		0	0	0	0	0	0	0	0	0
							NFASC		0	0	0	0	0	0	0	0	0
							NFATC2IP		0	0	0	0	0	0	0	0	0
							NFATC4		1	0	0	0	0	0	0	0	0
							NFE2L1		0	0	0	0	0	0	0	0	0
							NFIC		0	0	0	0	0	0	0	0	0
							NFKB2		0	0	0	1	0	0	0	0	0
							NFKBID		0	0	0	0	0	0	0	0	0
							NFKBIL1		1	0	0	0	0	0	0	0	0
							NFKBIZ		0	0	0	0	0	0	0	0	0
							NFX1		1	1	0	0	0	0	0	0	0
							NFYA		1	1	0	0	0	0	0	0	0
							NINJ1		0	0	0	0	0	0	0	0	0
							NKAP		0	0	0	0	0	0	0	0	0
							NKX2-5		0	0	0	0	0	0	0	0	0
							NLGN4X		0	0	0	0	0	0	0	0	0
							NLK		0	0	0	0	0	0	0	0	0
							NLRC5	inter+mi	0	0	0	0	0	0	1	0	0
							NLRP3		0	0	0	0	1	0	0	0	0
							NME3		0	0	0	0	0	0	0	0	0
							NMT1		0	0	0	0	0	0	0	0	0
							NOL11		0	0	0	0	0	0	0	0	0
							NOL3		1	0	0	0	0	0	0	0	0
							NONO		0	0	0	0	0	0	0	0	0
							NOS3		1	0	0	0	0	0	0	0	0
							NOSIP		0	0	0	0	0	0	0	0	0
							NOTCH1		1	0	0	0	0	0	0	1	0
							NOXA1		1	0	0	0	0	0	0	0	0
							NPM1		0	1	0	0	0	0	0	1	0
							NPTN		0	0	0	0	0	0	0	0	0
							NR1H2		0	0	0	0	0	0	0	0	0
							NRAS		0	1	0	1	0	0	0	1	0
							NREP		0	0	0	0	0	0	0	0	0
							NRIP1		0	0	0	0	0	0	0	0	0
							NRXN3		0	1	0	0	0	0	0	0	0
							NSF		0	0	0	0	0	0	0	0	0
							NTF4		0	0	0	0	0	0	0	0	0
							NTMT1		0	0	0	0	0	0	0	0	0
							NTSR1		1	1	0	0	0	0	0	0	0
							NUCB1		0	0	0	0	0	0	0	0	0
							NUCB2		1	0	0	0	0	0	0	0	0
							NUCKS1		0	0	0	0	0	0	0	0	0
							NUDT21		0	0	0	0	0	0	0	0	0
							NUMBL		0	0	0	0	0	0	0	0	0
							NUP153		0	1	0	1	0	0	0	0	0
							NUP214		0	1	0	1	0	0	0	0	0
							NUP62		0	0	0	1	0	0	0	0	0
							NUP93		0	0	0	1	0	0	1	0	0
							NUS1		0	0	0	0	0	0	0	0	0
							NUTF2		0	0	0	0	0	0	0	0	0
							OAS2		1	0	0	1	0	0	1	0	0
							OMD		0	0	0	0	0	0	0	0	0
							OPA3		0	0	0	0	0	0	0	0	0
							OPHN1		0	0	0	0	0	0	0	0	0
							OPTN		0	0	0	0	0	0	0	0	0
							ORM1		1	1	0	0	0	0	0	0	0
							ORM2		1	1	0	0	0	0	0	0	0
							ORMDL3		0	0	0	0	0	0	0	0	0
							OSMR		0	0	0	1	1	0	0	0	0
							OXT		1	1	0	0	0	0	0	0	0
							P2RY13		0	0	0	0	0	0	0	0	0
							PA2G4		0	0	0	0	0	0	0	0	0
							PABPC1	intra+mi	1	1	0	0	0	0	0	1	0
							PACS1		0	0	0	0	0	0	0	0	0
							PACS2		0	0	0	0	0	0	0	0	0
							PACSIN2		1	0	0	0	0	0	0	0	0
							PAFAH1B3		0	0	0	0	0	0	0	0	0
							PAK1		0	0	0	0	0	0	0	0	0
							PAK2		0	0	0	1	0	0	0	0	0
							PANK3		0	0	0	0	0	0	0	0	0
							PAPOLA		1	0	0	0	0	0	0	0	0
							PARL		0	0	0	0	0	0	0	0	0
							PARP1		0	0	0	0	0	0	0	1	0
							PARP16		0	0	0	0	0	0	0	0	0
							PARVB	intra+mi	1	0	0	0	0	0	0	0	0
							PARVG		0	0	0	0	0	0	0	0	0
							PASK		0	0	0	0	0	0	0	0	0
							PATZ1		0	0	0	0	0	0	0	0	0
							PCDH11Y		0	0	0	0	0	0	0	0	0
							PCDH17		0	0	0	0	0	0	0	0	0
							PCLO		0	0	0	0	0	0	0	0	0
							PCMT1		0	0	0	0	0	0	0	0	0
							PCNA		0	0	0	0	0	0	0	0	0
							PCNT		1	0	0	0	0	0	0	0	0
							PCYOX1		0	0	0	0	0	0	0	0	0
							PDCD6IP		0	0	0	0	0	0	0	0	0
							PDCD7		0	0	0	0	0	0	0	0	0
							PDDC1		1	0	0	0	0	0	0	0	0
							PDE12		0	0	0	1	0	0	0	0	0
							PDE4A		0	0	0	0	0	0	0	0	0
							PDE4DIP		0	0	0	0	0	0	0	0	0
							PDE5A		0	1	0	0	0	0	0	0	0
							PDGFC		0	0	0	0	0	0	0	0	0
							PDGFRA		1	1	0	0	0	0	0	0	0
							PDGFRB		0	0	0	0	0	0	0	0	0
							PDHX		0	0	0	0	0	0	0	0	0
							PDIA2		1	0	0	0	0	0	0	0	0
							PDIA3		0	0	0	0	0	0	0	0	0
							PDIA6		0	0	0	0	0	0	0	0	0
							PDK3		0	0	0	0	0	0	0	0	0
							PDLIM5		0	0	0	0	0	0	0	0	0
							PDPK1		0	0	0	0	0	0	0	0	0
							PDXK		0	0	0	0	0	0	0	0	0
							PEA15		0	0	0	0	0	0	0	0	0
							PEBP1		0	0	0	0	0	0	0	0	0
							PEG10		0	0	0	0	0	0	0	0	0
							PELI1		0	0	0	1	0	0	1	0	0
							PEX11B	inter+mi	0	0	0	0	0	0	0	0	0
							PEX26		0	0	0	0	0	0	0	0	0
							PFDN2		0	0	0	0	0	0	0	0	0
							PFKL		0	0	0	0	0	0	0	0	0
							PFKP		0	0	0	0	0	0	1	0	0
							PFN1		0	0	0	0	0	0	0	0	0
							PGAM1		0	0	0	0	0	0	0	0	0
							PGLS		0	0	0	0	0	0	0	0	0
							PGLYRP3		0	0	0	0	0	0	0	0	0
							PHB2	inter+mi	1	0	0	0	0	0	0	0	0
							PHC2		0	0	0	0	0	0	0	0	0
							PHF10		1	0	0	0	0	0	0	0	0
							PHF20		0	0	0	0	0	0	0	0	0
							PHLDA2		0	0	0	0	0	0	0	0	0
							PHLDA3		0	0	0	0	0	0	0	0	0
							PHLPP1		0	0	0	0	0	0	0	0	0
							PHLPP2		0	0	0	0	0	0	0	0	0
							PI4KB		0	0	0	0	0	0	0	0	0
							PIAS2		0	0	0	0	0	0	0	0	0
							PIAS4		0	0	0	0	0	0	0	0	0
							PIDD		1	0	0	0	0	0	0	0	0
							PIGH		0	0	0	0	0	0	0	0	0
							PIGR		0	0	0	0	0	0	0	0	0
							PIH1D1		0	0	0	0	0	0	0	0	0
							PIK3CB	DB+mi	0	0	0	1	0	0	0	0	0
							PIK3CD		0	0	0	1	0	0	0	0	0
							PIK3CG		0	0	0	0	0	0	0	0	0
							PIK3R1		0	0	0	1	0	0	0	1	0
							PIK3R2		0	0	0	1	0	0	0	0	0
							PIK3R3		0	0	0	1	0	0	0	0	0
							PIN1		0	0	0	1	0	0	0	0	0
							PITPNC1		0	0	0	0	0	0	0	0	0
							PIWIL2		0	0	0	0	0	0	0	0	0
							PKD1		0	0	0	0	0	0	0	0	0
							PKN3		1	0	0	0	0	0	0	0	0
							PKNOX1		0	0	0	0	0	0	0	0	0
							PKP4		0	0	0	0	0	0	0	0	0
							PLAGL2		0	0	0	0	0	0	0	0	0
							PLAU		0	0	0	0	0	0	0	0	0
							PLCB3		0	0	0	0	0	0	0	0	0
							PLCG2	inter+mi	0	1	0	0	0	0	0	0	0
							PLCL1		0	0	0	0	0	0	0	0	0
							PLEC		1	0	0	0	0	0	0	0	0
							PLSCR1		0	0	0	0	0	1	1	0	0
							PLTP		0	0	0	0	0	0	0	0	0
							PLXNB1		1	0	0	0	0	0	0	0	0
							PLXNB2		1	0	0	0	0	0	0	0	0
							PLXNC1		0	0	0	0	0	0	0	0	0
							PMAIP1		0	0	0	0	0	0	0	0	0
							PNRC1		0	0	0	0	0	0	0	0	0
							PNRC2		0	0	0	0	0	0	0	0	0
							POC1A	inter+mi	0	0	0	0	0	0	0	0	0
							POGK		0	0	0	0	0	0	0	0	0
							POLD4	inter+mi	1	0	0	0	0	0	0	0	0
							POLE3		0	0	0	0	0	0	0	0	0
							POLG		0	0	0	0	0	0	0	0	0
							POLL		0	0	0	0	0	0	0	0	0
							POLR2E	inter+mi	1	0	0	0	0	0	0	0	0
							POLR2F		0	0	0	0	0	0	0	0	0
							POLR2L		1	0	0	0	0	0	0	0	0
							POLR3A		1	1	0	0	0	0	0	0	0
							POLR3D		0	0	0	0	0	0	0	0	0
							POLR3GL		0	0	0	0	0	0	0	0	0
							POM121		0	0	0	1	0	0	0	0	0
							POU2F2		1	0	0	0	0	0	0	0	0
							POU3F3		0	0	0	0	0	0	0	0	0
							PPA2		0	0	0	0	0	0	0	0	0
							PPARGC1A		0	0	0	0	0	0	0	0	0
							PPARGC1B		0	0	0	0	0	0	0	0	0
							PPIC		0	0	0	0	0	0	0	0	0
							PPIE		0	0	0	0	0	0	0	0	0
							PPIF		0	0	0	0	0	0	0	0	0
							PPIL2		0	0	0	0	0	0	0	0	0
							PPM1B		0	0	0	1	0	0	0	0	0
							PPP1CA		0	0	0	0	0	0	0	0	0
							PPP1CB		0	0	0	0	0	0	0	0	0
							PPP1R15A		0	0	0	0	0	0	0	0	0
							PPP1R7		0	0	0	0	0	0	0	0	0
							PPP2CA		0	0	0	1	0	0	0	0	0
							PPP2R1B		0	0	0	1	0	0	0	0	0
							PPP2R4		0	0	0	0	0	0	0	0	0
							PPP2R5C		0	0	0	0	0	0	0	0	0
							PPP2R5D		0	0	0	1	0	0	0	0	0
							PPP2R5E		0	0	0	0	0	0	0	0	0
							PRDM1		0	0	0	0	0	0	0	0	0
							PRDM8		0	0	0	0	0	0	0	0	0
							PRDX1		0	0	0	0	0	0	0	0	0
							PRDX3		1	0	0	0	0	0	0	0	0
							PRDX5		0	0	0	0	0	0	0	0	0
							PRKAA2		0	0	0	0	0	0	0	0	0
							PRKCA		0	0	0	0	0	0	0	0	0
							PRKCB		0	0	0	0	0	0	0	0	0
							PRKRIP1		0	0	0	0	0	0	0	0	0
							PRKX		0	0	0	0	0	0	0	0	0
							PRNP		0	0	0	0	0	0	0	0	0
							PRPF19		0	0	0	0	0	0	0	0	0
							PRPF31		0	0	0	0	0	0	0	0	0
							PRPF8		0	0	0	0	0	0	0	0	0
							PRR11		0	0	0	0	0	0	0	0	0
							PRRC2A	inter+mi	1	0	0	0	0	0	0	0	0
							PRRC2B		0	0	0	0	0	0	0	0	0
							PRSS16		0	0	0	0	0	0	0	0	0
							PSIP1		0	0	0	0	0	0	0	0	0
							PSMA7		0	0	0	1	0	0	0	0	0
							PSMB5		1	0	0	1	0	0	0	0	0
							PSMB9		0	0	0	1	0	1	1	0	0
							PSMC3		0	0	0	1	0	0	0	0	0
							PSMC5	inter+mi	0	0	0	1	0	0	0	0	0
							PSMD3		0	0	0	1	0	0	0	0	0
							PSME3		0	0	0	1	0	0	0	0	0
							PSMG1		0	0	0	0	0	0	0	0	0
							PTAR1		0	0	0	0	0	0	0	0	0
							PTCD3		0	0	0	0	0	0	0	0	0
							PTGDS		0	0	0	0	0	0	0	0	0
							PTGES2		0	0	0	0	0	0	0	0	0
							PTGFRN		0	0	0	0	0	0	0	0	0
							PTGR2		0	0	0	0	0	0	0	0	0
							PTK2	DB+intra+mi	0	0	0	0	0	0	0	1	0
							PTK7		0	0	0	0	0	0	0	0	0
							PTMA		0	0	0	0	0	0	0	0	0
							PTP4A2		0	0	0	0	0	0	0	0	0
							PTPN11		0	0	0	1	0	0	0	1	0
							PTPN2		0	1	0	1	0	0	1	0	0
							PTPN6		1	0	0	1	0	0	1	0	0
							PTPN7		0	0	0	1	0	0	0	0	0
							PTPN9	inter+mi	0	0	0	1	0	0	0	0	0
							PTPRCAP		0	0	0	0	0	0	0	0	0
							PTPRE		0	0	0	0	1	0	0	0	0
							PTPRM		1	0	0	0	0	0	0	0	0
							PTRH2		1	0	0	0	0	0	0	0	0
							PTTG1IP		0	0	0	0	0	0	0	0	0
							PTX3		0	0	0	0	0	0	0	0	0
							PURA		0	0	0	0	0	0	0	0	0
							PURB		0	0	0	0	0	0	0	0	0
							PUS1		0	0	0	0	0	0	0	0	0
							PVR		0	0	0	0	1	0	0	0	0
							PYCARD		0	0	0	0	0	0	0	0	0
							QKI		0	0	0	0	0	0	0	0	0
							QSER1		0	0	0	0	0	0	0	0	0
							RAB11FIP1		0	0	0	0	0	0	0	0	0
							RAB11FIP4		0	1	0	0	0	0	0	0	0
							RAB13	inter+mi	0	0	0	0	0	0	0	0	0
							RAB1A		0	0	0	0	0	0	0	0	0
							RAB26		1	0	0	0	0	0	0	0	0
							RAB27A		0	0	0	0	0	0	0	0	0
							RAB32		0	0	0	0	0	0	0	0	0
							RAB35	inter+mi	0	0	0	0	0	0	0	0	0
							RAB3A		0	0	0	0	0	0	0	0	0
							RAB3B		0	0	0	0	0	0	0	0	0
							RAB40C		1	0	0	0	0	0	0	0	0
							RAB5C		1	0	0	0	0	0	0	0	0
							RABGAP1		0	0	0	0	0	0	0	0	0
							RABGAP1L		0	0	0	0	0	0	0	0	0
							RABGGTB		0	0	0	0	0	0	0	0	0
							RAC1		0	0	0	0	0	0	0	1	0
							RAC2	inter+mi	1	0	0	0	0	0	0	1	0
							RACGAP1		0	0	0	0	0	0	0	0	0
							RAD23A		0	0	0	0	0	0	0	0	0
							RAD9A		1	0	0	0	0	0	0	0	0
							RAE1		0	0	0	1	0	0	0	0	0
							RAF1		0	0	0	0	1	0	0	1	0
							RALA		0	0	0	1	0	0	0	0	0
							RAPGEF1		1	0	0	1	0	0	0	0	0
							RASSF3		0	0	0	0	0	0	0	0	0
							RB1		0	0	0	0	0	0	0	0	0
							RB1CC1		0	0	0	0	0	0	0	0	0
							RBBP4		0	0	0	0	0	0	0	0	0
							RBM17		0	0	0	0	0	0	0	0	0
							RBM3		0	0	0	0	0	0	0	0	0
							RBM33		0	0	0	0	0	0	0	0	0
							RBM38	inter+mi	0	0	0	0	0	0	0	0	0
							RBPJ		0	0	0	0	0	0	0	0	0
							RCAN1		0	0	0	0	0	0	0	0	0
							RDH11		0	0	0	0	0	0	0	0	0
							REL		0	0	0	0	0	0	0	0	0
							RELA		0	0	0	1	1	0	0	1	0
							REPS1		0	0	0	0	0	0	0	0	0
							REST		0	0	0	0	0	0	0	0	0
							RFFL		0	0	0	0	0	0	0	0	0
							RFX5		0	0	0	0	0	0	0	0	0
							RGS11		1	0	0	0	0	0	0	0	0
							RHBDF2		0	0	0	0	0	0	0	0	0
							RHOA	inter+mi	1	0	0	0	0	0	0	1	0
							RHOB		0	0	0	0	0	0	0	0	0
							RHOT2		1	0	0	0	0	0	0	0	0
							RIF1		0	0	0	0	0	0	0	0	0
							RIMS3		0	0	0	0	0	0	0	0	0
							RNASEH1		0	0	0	0	0	0	0	0	0
							RNF11		0	0	0	0	0	0	0	0	0
							RNF126		1	1	0	0	0	0	0	0	0
							RNF128		0	0	0	0	0	0	0	0	0
							RNF146		0	0	0	0	0	0	0	0	0
							RNF149		0	0	0	0	0	0	0	0	0
							RNF166		0	0	0	0	0	0	0	0	0
							RNF170		0	0	0	0	0	0	0	0	0
							RNF216		0	0	0	0	0	0	0	0	0
							RNF41		0	0	0	0	0	0	0	0	0
							RNMT		0	0	0	0	0	0	0	0	0
							RNPS1		1	1	0	0	0	0	0	0	0
							ROCK1		0	0	0	0	0	0	0	0	0
							RORA		0	0	0	1	0	0	0	0	0
							RPL10		0	0	0	0	0	0	0	0	0
							RPL11		0	0	0	0	0	0	0	0	0
							RPL12	inter+mi	0	0	0	0	0	0	0	0	0
							RPL13A		0	0	0	0	0	0	0	0	0
							RPL15		0	0	0	0	0	0	0	0	0
							RPL18		0	0	0	0	0	0	0	0	0
							RPL22		0	0	0	0	0	0	0	0	0
							RPL23A		0	0	0	0	0	0	0	0	0
							RPL26		0	0	0	0	0	0	0	0	0
							RPL27A		0	0	0	0	0	0	0	0	0
							RPL29		0	0	0	0	0	0	0	0	0
							RPL32		0	0	0	0	0	0	0	0	0
							RPL4		0	0	0	0	0	0	0	1	0
							RPL7		0	0	0	0	0	0	0	0	0
							RPL7A		0	0	0	0	0	0	0	0	0
							RPL7L1		0	0	0	0	0	0	0	0	0
							RPL8	inter+mi	0	0	0	0	0	0	0	0	0
							RPL9		0	0	0	0	0	0	0	0	0
							RPLP2		1	0	0	0	0	0	0	0	0
							RPS10		0	0	0	0	0	0	0	0	0
							RPS11		0	0	0	0	0	0	0	0	0
							RPS14		1	0	0	0	0	0	0	0	0
							RPS15		1	0	0	0	0	0	0	0	0
							RPS15A		0	0	0	0	0	0	0	0	0
							RPS16		0	0	0	0	0	0	0	0	0
							RPS18		0	0	0	0	0	0	0	0	0
							RPS19		0	0	0	0	0	0	0	0	0
							RPS19BP1	intra+mi	1	0	0	0	0	0	0	0	0
							RPS21		0	0	0	0	0	0	0	0	0
							RPS24		1	1	0	0	0	0	0	0	0
							RPS27		0	0	0	0	0	0	0	0	0
							RPS3		1	0	0	0	0	0	0	1	0
							RPS3A		0	0	0	0	0	0	0	0	0
							RPS4X		0	0	0	0	0	0	0	0	0
							RPS5		0	0	0	0	0	0	0	0	0
							RPS6KA1		1	1	0	1	0	0	0	0	0
							RPS6KA4		0	0	0	0	0	0	0	0	0
							RPS6KA5		0	0	0	1	0	0	0	0	0
							RPS6KB2		0	0	0	0	0	0	0	0	0
							RRAD		0	0	0	0	0	0	0	0	0
							RREB1		0	0	0	0	0	0	0	0	0
							RSF1		0	0	0	0	0	0	0	0	0
							RSL1D1		0	0	0	0	0	0	0	0	0
							RSPH4A		0	0	0	0	0	0	0	0	0
							RSU1		0	0	0	0	0	0	0	0	0
							RTKN		0	0	0	0	0	0	0	0	0
							RTN2		0	0	0	0	0	0	0	0	0
							RTN3		1	0	0	0	0	0	0	0	0
							RUSC1		1	0	0	0	0	0	0	0	0
							RUVBL1	DB+intra+mi	0	0	0	0	0	0	0	1	0
							RWDD1		0	0	0	0	0	0	0	0	0
							RXRA		0	0	0	0	0	0	0	0	0
							RYK		0	0	0	0	0	0	0	0	0
							S100A14		0	0	0	0	0	0	0	0	0
							S100B		0	0	0	1	0	0	0	0	0
							SAMHD1		0	0	0	1	0	0	1	0	0
							SAMSN1		0	0	0	0	0	0	0	0	0
							SAR1A		0	0	0	0	0	0	0	0	0
							SBNO2		1	0	0	0	0	0	0	0	0
							SCAMP2		1	0	0	0	0	0	0	0	0
							SCARB2		0	0	0	0	0	0	0	0	0
							SCD5		0	1	0	0	0	0	0	0	0
							SCRIB		1	0	0	0	0	0	0	0	0
							SDF2L1		0	0	0	0	0	0	0	0	0
							SDF4		1	0	0	0	0	0	0	0	0
							SDK2		0	0	0	0	0	0	0	0	0
							SDPR		0	0	0	0	0	0	0	0	0
							SEC23B		0	0	0	0	0	0	0	0	0
							SEC31A		0	0	0	0	0	0	0	0	0
							SEC63		0	0	0	0	0	0	0	0	0
							SELL		0	0	0	0	1	1	0	0	0
							SEMA4C		0	0	0	0	0	0	0	0	0
							SEMA5A		0	1	0	0	0	0	0	0	0
							SEMA6B	inter+mi	1	0	0	0	0	0	0	0	0
							SENP1		0	0	0	0	0	0	0	0	0
							SEPT1		0	0	0	0	0	0	0	0	0
							SEPT2	inter+mi	0	0	0	0	0	0	0	0	0
							SERBP1		0	0	0	0	0	0	0	0	0
							SERINC3		0	0	0	0	0	0	0	0	0
							SERPINE1		0	0	0	0	1	0	0	0	0
							SERPINF2		0	0	0	0	0	0	0	0	0
							SERPING1		0	0	0	0	0	0	1	0	0
							SERTAD2		0	0	0	0	0	0	0	0	0
							SERTAD3		0	0	0	0	0	0	0	0	0
							SF3A1		1	0	0	0	0	0	0	0	0
							SFPQ		0	0	0	0	0	0	0	0	0
							SFRP1		0	0	0	0	0	0	0	0	0
							SFRP5		0	0	0	0	0	0	0	0	0
							SGPL1		0	0	0	0	0	0	0	0	0
							SH2B3		0	0	0	1	0	0	0	0	0
							SH3BP4		0	0	0	0	0	0	0	0	0
							SH3BP5		0	0	0	0	0	0	0	0	0
							SH3GL1	inter+mi	1	1	0	0	0	0	0	0	0
							SHISA5	inter+mi	1	0	0	0	0	0	0	0	0
							SHMT1		0	0	0	0	0	0	0	0	0
							SHMT2		0	0	0	0	0	0	0	0	0
							SIGLEC14		0	0	0	0	0	0	0	0	0
							SIGLEC6		0	0	0	0	0	0	0	0	0
							SIGLEC9		0	0	0	0	0	0	0	0	0
							SIGMAR1		0	0	0	0	0	0	0	0	0
							SIK2		0	0	0	0	0	0	0	0	0
							SIRPA		0	0	0	0	0	0	0	0	0
							SIRT2		0	0	0	0	0	0	0	0	0
							SIX1		0	0	0	0	0	0	0	0	0
							SKI		1	0	0	0	0	0	0	0	0
							SKP2		0	0	0	0	0	0	0	0	0
							SLC10A2		0	0	0	0	0	0	0	0	0
							SLC10A3		0	0	0	0	0	0	0	0	0
							SLC11A2		0	0	0	0	1	0	0	0	0
							SLC16A5		0	0	0	0	0	0	0	0	0
							SLC22A3		0	0	0	0	0	0	0	0	0
							SLC25A37		0	0	0	0	0	0	0	0	0
							SLC25A44		0	1	0	0	0	0	0	0	0
							SLC25A46		0	0	0	0	0	0	0	0	0
							SLC27A1		0	0	0	0	0	0	0	0	0
							SLC2A11		1	0	0	0	0	0	0	0	0
							SLC2A3		0	0	0	0	0	0	0	0	0
							SLC2A4RG		0	0	0	0	0	0	0	0	0
							SLC35A1		0	0	0	0	0	0	0	0	0
							SLC35D2		0	0	0	0	0	0	0	0	0
							SLC35E1		0	0	0	0	0	0	0	0	0
							SLC35E2		1	0	0	0	0	0	0	0	0
							SLC39A10		0	0	0	0	0	0	0	0	0
							SLC3A2		1	0	0	0	0	0	0	0	0
							SLC41A1		0	0	0	0	0	0	0	0	0
							SLC4A1		0	0	0	0	0	0	0	0	0
							SLC50A1		1	0	0	0	0	0	0	0	0
							SLC5A8		0	0	0	0	0	0	0	0	0
							SLC6A6		0	0	0	0	0	0	0	0	0
							SLC7A5		0	0	0	0	0	0	0	0	0
							SLC7A6		0	0	0	0	0	0	0	0	0
							SLFN11		0	0	0	0	0	0	0	0	0
							SLIT1		0	0	0	0	0	0	0	0	0
							SLIT3		1	0	0	0	0	0	0	0	0
							SLPI		0	0	0	0	0	0	0	0	0
							SMAD3		0	0	0	1	0	0	0	1	0
							SMAD4		0	0	0	0	0	0	0	1	0
							SMAD5		0	0	0	0	0	0	0	0	0
							SMAD6		0	0	0	0	0	0	0	0	0
							SMAGP		0	0	0	0	0	0	0	0	0
							SMARCA5		0	0	0	0	0	0	0	0	0
							SMARCD2		0	0	0	0	0	0	0	0	0
							SMC3		0	0	0	0	0	0	0	0	0
							SMCR7L		1	0	0	0	0	0	0	0	0
							SMURF1		0	0	0	0	0	0	0	0	0
							SMURF2		1	0	0	0	0	0	0	0	0
							SNAP29	inter+mi	0	0	0	0	0	0	0	0	0
							SNAPIN		0	0	0	0	0	0	0	0	0
							SNCA		0	0	0	0	0	0	0	0	0
							SND1	inter+mi	1	0	0	0	0	0	0	0	0
							SNHG7		0	0	0	0	0	0	0	0	0
							SNRK		0	0	0	0	0	0	0	0	0
							SNRPA		0	0	0	0	0	0	0	0	0
							SNRPB		0	0	0	0	0	0	0	0	0
							SNRPD1		0	0	0	0	0	0	0	0	0
							SNRPD3		0	0	0	0	0	0	0	0	0
							SNRPN		0	0	0	0	0	0	0	0	0
							SNTB2	intra+mi	0	0	0	0	0	0	0	0	0
							SNX4		0	0	0	0	0	0	0	0	0
							SOAT1		0	0	0	0	0	0	0	0	0
							SOCS2		0	0	0	1	0	0	0	0	0
							SOCS5		0	0	0	1	0	0	0	0	0
							SOCS6		0	0	0	1	0	0	0	0	0
							SOD2		0	0	0	1	0	0	1	0	0
							SOX18		1	1	0	0	0	0	0	0	0
							SOX2		0	0	0	1	0	0	0	1	0
							SOX4		0	0	0	0	0	0	0	0	0
							SOX9		0	0	0	0	0	0	0	0	0
							SP2		0	0	0	0	0	0	0	0	0
							SP7		0	0	0	0	0	0	0	0	0
							SPACA4		0	0	0	0	0	0	0	0	0
							SPAG9		0	0	0	0	0	0	0	0	0
							SPAM1		0	0	0	0	0	0	0	0	0
							SPARC		0	0	0	0	0	0	0	0	0
							SPEN		0	1	0	0	0	0	0	0	0
							SPG21		0	0	0	0	0	0	0	0	0
							SPHK2		0	0	0	0	0	0	0	0	0
							SPIB		0	0	0	0	0	0	0	0	0
							SPPL3		1	0	0	0	0	0	0	0	0
							SPTBN2	intra+mi	0	0	0	0	0	0	0	0	0
							SQSTM1		1	0	0	1	0	0	0	0	0
							SREBF1		0	0	0	0	0	0	0	0	0
							SRM		0	0	0	0	0	0	0	0	0
							SRPK1		0	0	0	0	0	0	0	0	0
							SS18		0	0	0	0	0	0	0	0	0
							SSBP2		0	0	0	0	0	0	0	0	0
							SSBP4		0	0	0	0	0	0	0	0	0
							SSNA1	inter+mi	1	0	0	0	0	0	0	0	0
							SSPN		0	0	0	0	0	0	0	0	0
							SSRP1		0	0	0	0	0	0	0	0	0
							SSX1		0	0	0	0	0	0	0	0	0
							SSX2IP		0	0	0	0	0	0	0	0	0
							ST3GAL2	inter+mi	0	0	0	0	0	0	0	0	0
							ST3GAL5		0	0	0	0	0	0	1	0	0
							STAP2		0	0	0	0	0	0	0	0	0
							STAR		0	0	0	0	0	0	0	0	0
							STARD7		0	0	0	0	0	0	0	0	0
							STAT1		0	0	0	1	0	0	1	1	0
							STAT6		0	1	0	1	0	0	0	0	0
							STK25		0	0	0	0	0	0	0	0	0
							STK4		0	0	0	0	0	0	0	0	0
							STMN3		1	0	0	0	0	0	0	0	0
							STT3B		0	0	0	0	0	0	0	0	0
							STUB1		1	0	0	0	0	0	0	0	0
							STXBP2		0	0	0	1	0	0	0	0	0
							SULT1B1		0	0	0	0	0	0	0	0	0
							SULT1C2		0	0	0	0	0	0	0	0	0
							SUMO1		0	0	0	1	0	0	0	1	0
							SURF1		0	0	0	0	0	0	0	0	0
							SURF4	inter+mi	0	0	0	0	0	0	0	0	0
							SUZ12		0	0	0	0	0	0	0	0	0
							SWAP70		0	0	0	0	0	0	0	0	0
							SYK		0	0	0	1	0	0	0	1	0
							SYMPK		0	0	0	0	0	0	0	0	0
							TAB1		0	0	0	1	0	0	0	0	0
							TAB2		0	0	0	1	0	0	0	0	0
							TACC1		0	0	0	0	0	0	0	0	0
							TACC3		0	0	0	0	0	0	0	0	0
							TAF4		0	0	0	0	0	0	0	0	0
							TAF8		0	0	0	0	0	0	0	0	0
							TAF9B		0	0	0	0	0	0	0	0	0
							TAGLN		0	0	0	0	0	0	0	0	0
							TALDO1		1	0	0	1	0	0	0	0	0
							TAPBP		0	0	0	0	1	0	1	0	0
							TBC1D10C		0	0	0	0	0	0	0	0	0
							TBC1D15		0	0	0	0	0	0	0	0	0
							TBC1D9B		1	0	0	0	0	0	0	0	0
							TBK1		0	0	0	1	0	0	0	0	0
							TBRG1		0	0	0	0	0	0	0	0	0
							TCAM1P		0	0	0	0	0	0	0	0	0
							TCERG1		0	0	0	0	0	0	0	0	0
							TCF3		0	0	0	0	0	0	0	0	0
							TCF4		0	0	0	0	0	0	0	0	0
							TCF7L2		0	0	0	0	0	0	0	0	0
							TCIRG1		1	0	0	0	0	0	0	0	0
							TCL1B		0	0	0	0	0	0	0	0	0
							TCTA		1	0	0	0	0	0	0	0	0
							TCTN3		0	0	0	0	0	0	0	0	0
							TECPR1		0	0	0	0	0	0	0	0	0
							TERT		0	1	0	0	0	0	0	0	0
							TEX261		0	0	0	0	0	0	0	0	0
							TFDP2		0	0	0	0	0	0	0	0	0
							TFG		0	0	0	0	0	0	0	0	0
							TFPI		0	0	0	0	0	0	0	0	0
							TFR2		0	0	0	0	0	0	0	0	0
							TFRC		0	0	0	0	0	0	0	0	0
							TGFB2		0	0	0	0	0	0	0	0	0
							TGFBR1	inter+mi	0	0	0	0	0	0	0	0	0
							TGFBR2		0	0	0	0	0	0	0	0	0
							TGFBR3		0	0	0	0	0	0	0	0	0
							TGIF1		0	0	0	0	0	0	0	0	0
							TGIF2		0	0	0	0	0	0	0	0	0
							TGM2		0	0	0	0	0	0	0	0	0
							THAP2		0	0	0	0	0	0	0	0	0
							THBS1		0	0	0	0	0	0	0	0	0
							THBS2		0	0	0	0	0	0	0	0	0
							THRA		0	0	0	0	0	0	0	0	0
							THRB		0	0	0	0	0	0	0	0	0
							TIAF1		0	0	0	0	0	0	0	0	0
							TIAL1		0	0	0	0	0	0	0	0	0
							TICAM1		0	0	0	0	0	0	0	0	0
							TIMM50		0	0	0	0	0	0	0	0	0
							TLN1		1	0	0	0	0	0	0	0	0
							TLR2		0	0	0	0	1	0	0	0	0
							TLR4		0	0	0	0	0	0	0	1	0
							TLR6		0	0	0	0	0	0	0	0	0
							TM9SF3		0	0	0	0	0	0	0	0	0
							TMBIM6		0	0	0	0	0	0	0	0	0
							TMC6		0	0	0	0	0	0	0	0	0
							TMC8	DB+intra+mi	0	0	0	0	0	0	0	0	0
							TMED10		0	0	0	0	0	0	0	0	0
							TMED4		0	0	0	0	0	0	0	0	0
							TMED5		0	1	0	0	0	0	0	0	0
							TMED7		0	0	0	0	0	0	0	0	0
							TMEM109		0	0	0	0	0	0	0	0	0
							TMEM50B		0	0	0	0	0	0	0	0	0
							TMEM80		0	0	0	0	0	0	0	0	0
							TMEM8A	inter+mi	1	0	0	0	0	0	0	0	0
							TMEM9B		0	0	0	0	0	0	0	0	0
							TNFAIP2		0	0	0	0	0	0	1	0	0
							TNFAIP3		0	0	0	0	0	0	1	0	0
							TNFAIP8		0	0	0	0	0	0	0	0	0
							TNFAIP8L1		0	0	0	0	0	0	0	0	0
							TNFRSF10D		0	0	0	0	0	0	0	0	0
							TNFRSF13C		0	0	0	1	0	0	0	0	0
							TNFRSF18		1	1	0	1	0	0	0	0	0
							TNFRSF1B		0	0	0	1	1	0	0	0	0
							TNFRSF21		0	0	0	0	0	0	0	0	0
							TNFRSF4		1	1	0	1	0	0	0	0	0
							TNFRSF6B		0	0	0	1	0	0	0	0	0
							TNFSF14		0	0	0	1	0	0	0	0	0
							TNIP3		0	0	0	0	0	0	0	0	0
							TNPO1		0	0	0	0	0	0	0	0	0
							TNR		0	1	0	0	0	0	0	0	0
							TNRC6A		0	1	0	0	0	0	0	0	0
							TNRC6B		0	0	0	0	0	0	0	0	0
							TNRC6C		0	0	0	0	0	0	0	0	0
							TOB2		0	0	0	0	0	0	0	0	0
							TOLLIP		0	0	0	1	0	0	0	0	0
							TOM1L2		0	0	0	0	0	0	0	0	0
							TOMM20		0	0	0	0	0	0	0	0	0
							TONSL		0	0	0	0	0	0	0	0	0
							TOP1		0	0	0	0	0	0	0	0	0
							TOP2A		1	1	0	0	0	0	0	0	0
							TOR1B		0	0	0	0	0	0	1	0	0
							TP53I3		0	0	0	0	0	0	0	0	0
							TP53INP1		0	0	0	0	0	0	0	0	0
							TPD52		0	0	0	0	0	0	0	0	0
							TPI1	intra+mi	1	0	0	0	0	0	0	0	0
							TPM4		1	0	0	0	0	0	0	0	0
							TPP1		0	0	0	0	0	0	0	0	0
							TPST2		0	0	0	0	0	0	0	0	0
							TPX2		1	0	0	0	0	0	0	0	0
							TRAF2		1	0	0	1	0	0	0	0	0
							TRAF7	inter+mi	1	0	0	0	0	0	0	0	0
							TRAFD1		0	0	0	0	0	1	1	0	0
							TRAJ48		0	0	0	0	0	0	0	0	0
							TRAJ49		0	0	0	0	0	0	0	0	0
							TRAJ50		0	0	0	0	0	0	0	0	0
							TRAJ51		0	0	0	0	0	0	0	0	0
							TRAJ52		0	0	0	0	0	0	0	0	0
							TRAJ53		0	0	0	0	0	0	0	0	0
							TRAJ54		0	0	0	0	0	0	0	0	0
							TRAJ55		0	0	0	0	0	0	0	0	0
							TRAJ56		0	0	0	0	0	0	0	0	0
							TRAJ57		0	0	0	0	0	0	0	0	0
							TRAJ58		0	0	0	0	0	0	0	0	0
							TRAJ59		0	0	0	0	0	0	0	0	0
							TRAJ60		0	0	0	0	0	0	0	0	0
							TRAJ61		0	0	0	0	0	0	0	0	0
							TRAK2		0	0	0	0	0	0	0	0	0
							TRAP1		0	0	0	0	0	0	0	0	0
							TRAT1		0	0	0	0	0	0	0	0	0
							TRDC		0	0	0	0	0	0	0	0	0
							TRDD1		0	0	0	0	0	0	0	0	0
							TRDD2		0	0	0	0	0	0	0	0	0
							TRDD3		0	0	0	0	0	0	0	0	0
							TRDJ1		0	0	0	0	0	0	0	0	0
							TRDJ2		0	0	0	0	0	0	0	0	0
							TRDJ3		0	0	0	0	0	0	0	0	0
							TRDJ4		0	0	0	0	0	0	0	0	0
							TRDV2		0	0	0	0	0	0	0	0	0
							TRDV3		0	0	0	0	0	0	0	0	0
							TREX1		1	0	0	0	0	0	0	0	0
							TRIB1	inter+mi	1	0	0	0	0	0	0	0	0
							TRIM14		1	0	0	1	0	1	1	0	0
							TRIM28		0	0	0	0	0	0	0	0	0
							TRIM31		0	0	0	1	0	0	0	0	0
							TRIM37		0	0	0	0	0	0	0	0	0
							TRIM47		0	0	0	0	0	0	0	0	0
							TRIM63		0	0	0	0	0	0	0	0	0
							TRIM65		0	0	0	0	0	0	0	0	0
							TRIM71		0	0	0	0	0	0	0	0	0
							TRIM72		0	0	0	0	0	0	0	0	0
							TRIM8		0	0	0	1	0	0	0	0	0
							TRIP12		0	0	0	0	0	0	0	0	0
							TRPM4		0	0	0	0	0	0	0	0	0
							TRPM7		0	0	0	0	0	0	0	0	0
							TRPS1		0	0	0	0	0	0	0	0	0
							TRPV2		0	0	0	0	0	0	0	0	0
							TRRAP		0	0	0	0	0	0	0	0	0
							TSC1		0	0	0	0	0	0	0	0	0
							TSEN34		0	0	0	0	0	0	0	0	0
							TSN		0	0	0	0	0	0	0	0	0
							TUBB	inter+mi	0	0	0	0	0	0	0	0	0
							TUBB4B		1	0	0	0	0	0	0	0	0
							TWF1		0	0	0	0	0	0	0	0	0
							TWIST1		0	0	0	1	0	0	0	0	0
							TXK		1	0	0	0	0	0	0	0	0
							TXLNA		1	0	0	1	0	0	0	0	0
							TXNIP	inter+mi	0	0	0	0	0	1	1	0	0
							TXNL1		0	0	0	0	0	0	0	0	0
							TXNL4A		0	0	0	0	0	0	0	0	0
							TXNRD1		0	0	0	0	0	0	0	0	0
							TYRO3		0	0	0	0	0	0	0	0	0
							U2AF2		1	0	0	0	0	0	0	0	0
							UBE2D1		0	0	0	1	0	0	0	0	0
							UBE2N		0	0	0	1	0	0	0	0	0
							UBE2R2		0	0	0	0	0	0	0	0	0
							UBE2V1		0	0	0	1	0	0	0	0	0
							UBE2Z		0	0	0	0	0	0	0	0	0
							UBE3A		0	0	0	0	0	0	0	0	0
							UBE3C		1	0	0	0	0	0	0	0	0
							UBE4A		0	0	0	0	0	0	0	0	0
							UBR1		0	0	0	0	0	0	0	0	0
							UBTF		0	0	0	0	0	0	0	0	0
							UCHL1		0	0	0	0	0	0	0	0	0
							UCKL1		1	0	0	0	0	0	0	0	0
							UGP2		0	0	0	0	0	0	0	0	0
							UNC13A	inter+mi	1	0	0	0	0	0	0	0	0
							UNC5B		0	0	0	0	0	0	0	0	0
							UNC5CL		1	0	0	0	0	0	0	0	0
							UNC93B1		1	0	0	0	0	0	0	0	0
							UPF3A		1	0	0	0	0	0	0	0	0
							UQCRFS1		0	0	0	0	0	0	0	0	0
							USP14		0	0	0	0	0	0	0	0	0
							USP24		0	1	0	0	0	0	0	0	0
							USP3		0	0	0	0	0	0	0	0	0
							USP4		0	0	0	0	0	0	0	0	0
							UTP18		0	0	0	0	0	0	0	0	0
							UTP6		0	0	0	0	0	0	0	0	0
							VAMP8		0	0	0	0	0	0	1	0	0
							VASP		0	0	0	0	0	0	0	0	0
							VAV2		0	0	0	0	0	0	0	0	0
							VAV3		0	0	0	0	0	0	0	0	0
							VCAM1		0	0	0	1	0	0	1	0	0
							VCPIP1		0	0	0	0	0	0	0	0	0
							VDAC1		0	0	0	0	0	0	0	0	0
							VDR		1	0	0	0	0	0	0	0	0
							VEGFB	inter+mi	0	0	0	0	0	0	0	0	0
							VEZF1		0	0	0	0	0	0	0	0	0
							VEZT		0	0	0	0	0	0	0	0	0
							VHL		0	0	0	0	0	0	0	0	0
							VNN2		0	0	0	0	0	0	0	0	0
							VPS28		0	0	0	0	0	0	0	0	0
							VPS4A	DB+intra+mi	0	0	0	0	0	0	0	0	0
							VSIG1		0	0	0	0	0	0	0	0	0
							WASF2		0	0	0	0	0	0	0	0	0
							WASL		0	0	0	0	0	0	0	0	0
							WDR18		1	0	0	0	0	0	0	0	0
							WDR62		0	0	0	0	0	0	0	0	0
							WFIKKN1		1	0	0	0	0	0	0	0	0
							WFS1		0	0	0	0	0	0	0	0	0
							WHSC2		0	0	0	0	0	0	0	0	0
							WIPF2		1	0	0	0	0	0	0	0	0
							WISP1		1	1	0	0	0	0	0	0	0
							WNK1		0	0	0	0	0	0	0	0	0
							WNT3		0	0	0	0	0	0	0	0	0
							WRN		0	1	0	0	0	0	0	0	0
							WSB1		0	0	0	0	0	0	0	0	0
							WWTR1		0	0	0	0	0	0	0	0	0
							XIAP		0	0	0	0	0	0	0	0	0
							XKR4		0	1	0	0	0	0	0	0	0
							XKR6		0	0	0	0	0	0	0	0	0
							XPO1		0	0	0	0	0	0	0	1	0
							XPO6		0	0	0	0	0	0	0	0	0
							XPOT		0	0	0	0	0	0	0	0	0
							XRCC1		0	0	0	0	0	0	0	0	0
							XRCC2		1	0	0	0	0	0	0	0	0
							XRCC5		0	0	0	0	0	0	0	0	0
							XRCC6		0	0	0	0	0	0	0	0	0
							YARS		0	1	0	0	0	0	0	0	0
							YES1		1	0	0	1	0	0	0	0	0
							YOD1		0	0	0	0	0	0	0	0	0
							YTHDF1	inter+mi	0	0	0	0	0	0	0	0	0
							YWHAB		0	0	0	0	0	0	0	1	0
							YWHAQ		0	0	0	0	0	0	0	0	0
							YWHAZ		0	0	0	1	0	0	0	1	0
							YY1		0	0	0	0	0	0	0	0	0
							ZBTB16		0	1	0	0	0	0	0	0	0
							ZBTB24		0	0	0	0	0	0	0	0	0
							ZBTB7A		0	0	0	0	0	0	0	0	0
							ZC3H15		0	0	0	0	0	0	0	0	0
							ZCCHC2		0	0	0	0	0	0	0	0	0
							ZCCHC8		0	0	0	0	0	0	0	0	0
							ZDHHC3		0	0	0	0	0	0	0	0	0
							ZFP30		0	0	0	0	0	0	0	0	0
							ZMAT3		0	0	0	0	0	0	0	0	0
							ZNF207	inter+mi	0	0	0	0	0	0	0	0	0
							ZNF267		0	0	0	0	0	0	0	0	0
							ZNF281		0	0	0	0	0	0	0	0	0
							ZNF3		0	0	0	0	0	0	0	0	0
							ZNF395		0	0	0	0	0	0	0	0	0
							ZNF652		0	0	0	0	0	0	0	0	0
							ZNF792	DB+intra+mi	0	0	0	0	0	0	0	0	0
							ZNF85		0	0	0	0	0	0	0	0	0
							ZNFX1		0	0	0	0	0	0	1	0	0
							ZYG11B		0	0	0	0	0	0	0	0	0
							ZYX		0	0	0	0	0	0	0	0	0
									275	80	1	177	36	13	42	84	17
									0.159884	0.0465116	0.000581395	0.102907	0.0209302	0.00755814	0.0244186	0.0488372	0.00988372

## Sheet: Cluster5
Feature	NDE	TCGA DB	hg19				all genes	found in/via	germ targets	germ genes	somatic	enrich1	inflam	alpha	gamma			germ+somatic
cg07073964	0.0464	.	19	18	18		AAMP		0	0	0	0	0	0	0			FLT3
cg24091474	0.0235	TYROBP;TYROBP;TYROBP;TYROBP;TYROBP;TYROBP;TYROBP;TYROBP;TYROBP	19	910	910		AASDHPPT		0	0	0	0	0	0	0			PRDM16
cg14740251	0.0146	SIGLEC5;SIGLEC5;SIGLEC5	19	1304	1304		AATK		0	0	0	0	0	0	0			RERE
cg22220722	0.0086	PLA2G2A;PLA2G2A;PLA2G2A;PLA2G2A;PLA2G2A;PLA2G2A;PLA2G2A	1	508	508		ABCA1	inter+mi	0	0	0	0	1	0	0			XKR4
cg05668853	0.0083	RAB34;RAB34;RAB34;RAB34;RAB34;RAB34;RAB34;RAB34;RAB34;RAB34;RAB34;RAB34;RAB34;RAB34;RAB34;RAB34;RAB34;RAB34;RAB34;RAB34;RAB34	17	677	677		ABCA5		0	0	0	0	0	0	0			CDH23
cg04731091	0.0082	WDR37;WDR37;WDR37;WDR37	10	28	28		ABCA7		1	0	0	0	0	0	0
ENSG00000170909.12	0.008	0					ABCB1		0	1	0	0	0	0	0
cg24957240	0.0077	MTERF2;MTERF2;MTERF2;MTERF2;MTERF2;MTERF2	12	2685	2685		ABCB10		0	0	0	0	0	0	0
cg27180443	0.0073	SCARB1;SCARB1;SCARB1;SCARB1;SCARB1;SCARB1;SCARB1;SCARB1;SCARB1	12	3134	3134		ABCB7		0	0	0	0	0	0	0
hsa-mir-22	0.0069	0					ABCB9		0	0	0	0	0	0	0
cg03373442	0.0066	HSPH1;HSPH1;HSPH1;HSPH1;HSPH1;HSPH1	13	794	794		ABCC4		0	0	0	0	0	0	0
cg20692569	0.0066	FZD9	7	1822	1822		ABCC5		0	0	0	0	0	0	0
cg00948500	0.0064	KRTAP20-2	21	801	801		ABCD3		0	0	0	0	0	0	0
cg08077673	0.0062	MEST;MEST;MEST;MEST;MEST;MEST;MESTIT1;MESTIT1_1	7	3254	3254		ABCE1		0	0	0	1	0	0	0
cg00547018	0.0059	ALG1;ALG1;ALG1;ALG1;ALG1;ALG1;ALG1	16	129	129		ABCF1		0	0	0	0	0	0	0
cg08241785	0.0059	F2RL2;F2RL2;IQGAP2;IQGAP2;IQGAP2;IQGAP2;IQGAP2;IQGAP2;IQGAP2;IQGAP2;IQGAP2;IQGAP2;IQGAP2	5	1898	1898		ABCF2	inter+mi	0	0	0	0	0	0	0
cg11935638	0.0056	EHHADH;EHHADH;EHHADH;EHHADH;EHHADH;MIR5588	3	4625	4625		ABL2		0	1	0	1	0	0	0
cg00027083	0.0055	EPB41L3;EPB41L3;EPB41L3;EPB41L3;EPB41L3;EPB41L3;EPB41L3;EPB41L3	18	139	139		ABLIM1		0	0	0	0	0	0	0
cg05923056	0.0052	FOXN3;FOXN3;FOXN3;FOXN3;FOXN3;FOXN3;FOXN3-AS1;RP11-33N16.3	14	2248	2248		ABTB1		0	0	0	0	0	0	0
cg22510412	0.0052	BLCAP;BLCAP;BLCAP;BLCAP;BLCAP;BLCAP;BLCAP;BLCAP;BLCAP;BLCAP;BLCAP;NNAT;NNAT	20	904	904		ACAA2		0	0	0	0	0	0	0
cg25729765	0.0052	SP3;SP3;SP3;SP3;SP3	2	4371	4371		ACADVL		0	0	0	0	0	0	0
hsa-mir-103a-2	0.0049	0					ACE		0	0	0	0	0	0	0
hsa-mir-148a	0.0048	0					ACLY		0	0	0	0	0	0	0
cg24352688	0.0047	OFD1;OFD1;OFD1;OFD1;OFD1;OFD1;TRAPPC2;TRAPPC2;TRAPPC2;TRAPPC2;TRAPPC2;TRAPPC2	23	344	344		ACOX1		0	0	0	0	0	0	0
ENSG00000197794.2	0.0047	0					ACP6		0	0	0	0	0	0	0
hsa-mir-200b	0.0045	0					ACSF2		0	0	0	0	0	0	0
hsa-mir-103a-1	0.0043	0					ACSL1		0	0	0	0	0	0	0
cg15503752	0.0041	ST6GALNAC1;ST6GALNAC1;ST6GALNAC1;ST6GALNAC1;ST6GALNAC1;ST6GALNAC1;ST6GALNAC1	17	1866	1866		ACSL3		0	0	0	0	0	0	0
hsa-mir-21	0.0041	0					ACSL4		0	0	0	0	0	0	0
cg06131936	0.004	OSBPL5;OSBPL5;OSBPL5;OSBPL5;OSBPL5;OSBPL5;OSBPL5;OSBPL5;OSBPL5	11	80	80		ACSL5		0	0	0	0	0	0	0
cg09676390	0.004	ADARB1;ADARB1;ADARB1;ADARB1;ADARB1;ADARB1;ADARB1;ADARB1;SSR4P1;SSR4P1;SSR4P1	21	1163	1163		ACTB		0	0	0	0	0	0	0
cg06872381	0.0039	DPPA3	12	197	197		ACTC1		0	0	0	0	0	0	0
cg06642617	0.0038	CCT7;CCT7;CCT7;CCT7;CCT7;CCT7;CCT7;CCT7;CCT7;CCT7;CCT7;CCT7;CCT7;CCT7;PRADC1;PRADC1;PRADC1	2	1837	1837		ACTL6A		0	0	0	0	0	0	0
cg16510657	0.0038	TMEM35;TRMT2B-AS1	23	2509	2509		ACTN1		0	0	0	0	0	0	0
cg04431133	0.0037	MGAT2;RP11-649E7.5;RPL36AL	14	1253	1253		ACTN4		0	0	0	0	0	0	0
cg14636377	0.0037	RHEBL1;RHEBL1;RHEBL1;RHEBL1	12	1237	1237		ACTR2		0	0	0	0	0	0	0
cg15882999	0.0037	P4HB;P4HB;P4HB;P4HB;P4HB;P4HB;P4HB;P4HB;P4HB;P4HB;P4HB;P4HB;P4HB;P4HB	17	1996	1996		ACVR1		0	0	0	0	0	0	0
hsa-mir-133a-1	0.0037	0					ACVR1B		0	0	0	0	1	0	0
cg01584473	0.0036	MUC17;MUC17	7	2517	2517		ACVR1C		0	0	0	0	0	0	0
cg09504196	0.0036	RN7SL521P;ZNF398;ZNF425;ZNF425	7	3721	3721		ADAL		0	0	0	0	0	0	0
cg16744741	0.0036	PRKG2;PRKG2;PRKG2	4	2054	2054		ADAM10		0	0	0	0	0	0	0
hsa-mir-24-1	0.0036	0					ADAM12		0	0	0	0	0	0	0
cg02334775	0.0035	ISG20;ISG20;ISG20;ISG20;ISG20;ISG20	15	2230	2230		ADAM15		1	0	0	0	0	0	0
cg09736922	0.0035	EIF2B5;THPO;THPO	3	4603	4603		ADAM17		0	0	0	1	0	0	0
cg11346450	0.0035	0					ADAM19		1	0	0	0	0	0	0
cg18960218	0.0035	SLC7A7;SLC7A7;SLC7A7;SLC7A7;SLC7A7;SLC7A7;SLC7A7;SLC7A7;SLC7A7;SLC7A7;SLC7A7;SLC7A7;SLC7A7;SLC7A7;SLC7A7;SLC7A7;SLC7A7;SLC7A7	14	583	583		ADAM2		0	0	0	0	0	0	0
ENSG00000211654.2	0.0035	0					ADAM8		0	0	0	0	0	0	0
ENSG00000154146.11	0.0035	0					ADAMTS20		0	0	0	0	0	0	0
cg15361750	0.0034	C5AR2;C5AR2	19	1196	1196		ADAMTS8		0	0	0	0	0	0	0
hsa-mir-133a-2	0.0034	0					ADAMTSL4		0	0	0	0	0	0	0
cg15957394	0.0033	AC097381.1;AC097381.1;AFAP1;AFAP1	4	199	199		ADAR		0	0	0	1	0	1	1
cg21846903	0.0033	CTB-96E2.3;SARM1;SARM1;VTN;VTN;VTN	17	668	668		ADARB1	DB+intra+mi	0	0	0	0	0	0	0
hsa-mir-139	0.0033	0					ADCY4		1	0	0	0	0	0	0
cg02904235	0.0032	C14orf159;C14orf159;RPS6KA5;RPS6KA5;RPS6KA5;RPS6KA5;RPS6KA5;RPS6KA5	14	2289	2289		ADCY5		0	0	0	0	0	0	0
cg07236381	0.0032	AFF4;AFF4;AFF4;AFF4;CTC-350I8.1	5	3308	3308		ADCY6		0	0	0	0	0	0	0
cg07792737	0.0032	0					ADCY7		1	0	0	0	0	0	0
cg10726357	0.0032	SLC46A2;SLC46A2	9	2892	2892		ADCYAP1		0	0	0	0	0	0	0
cg12125117	0.0032	GPR97;GPR97;GPR97;GPR97;GPR97;GPR97	16	1443	1443		ADD3		0	0	0	0	0	0	0
cg16063112	0.0032	C10orf107;C10orf107	10	1586	1586		ADIG		0	0	0	0	0	0	0
hsa-mir-1-1	0.0032	0					ADIPOQ		0	0	0	0	0	0	0
ENSG00000211691.2	0.0032	0					ADNP		0	0	0	0	0	0	0
cg06504820	0.0031	DLK1;DLK1;DLK1;DLK1;DLK1	14	2530	2530		ADORA2A		0	0	0	0	0	0	0
cg10146929	0.0031	HIST1H1A	6	651	651		ADORA3		0	0	0	0	0	0	0
cg10468702	0.0031	PTGER1	19	365	365		ADRM1		0	0	0	0	1	0	0
cg17886959	0.0031	MT2A;MT2A;MT2A;MT2A;MT2A	16	1417	1417		ADSS		0	0	0	0	0	0	0
cg04956382	0.003	MYOT;MYOT;MYOT;MYOT;MYOT;RP11-381K20.2	5	3431	3431		AEN	intra+mi	0	0	0	0	0	0	0
cg08704606	0.003	MRC1	10	447	447		AFF1		0	0	0	0	0	0	0
cg05436231	0.0029	CD164L2;CD164L2;CD164L2	1	693	693		AGFG1		0	0	0	0	0	0	0
cg10127415	0.0029	MAGEB6	23	656	656		AGGF1		0	0	0	0	0	0	0
cg18847227	0.0029	SUMF1;SUMF1;SUMF1;SUMF1;SUMF1	3	113	113		AGPAT2		1	0	0	0	0	0	0
cg22908581	0.0029	CD4;CD4;CD4;CD4;CD4;CD4;CD4;CD4;CD4;CD4	12	173	173		AGPS		0	0	0	0	0	0	0
cg11693019	0.0028	AKR1B10;AKR1B10	7	3356	3356		AGR2		0	0	0	0	0	0	0
cg14732540	0.0028	BRDT;BRDT;BRDT;BRDT;BRDT;BRDT;BRDT;BRDT;BRDT;BRDT;BRDT;BRDT;BRDT;BRDT;BRDT;BRDT;BRDT;BRDT;BRDT	1	2311	2311		AHCTF1		0	0	0	0	0	0	0
cg09059945	0.0027	MEST;MEST;MEST;MEST;MEST;MEST;MESTIT1;MESTIT1_1	7	3254	3254		AHNAK	inter+mi	1	0	0	0	0	0	0
cg13053608	0.0027	GHDC;GHDC;GHDC;GHDC;GHDC;GHDC;GHDC;GHDC;GHDC;GHDC;GHDC	17	1009	1009		AHR		0	0	0	0	1	0	0
hsa-mir-3136	0.0027	0					AHSA2		0	0	0	0	0	0	0
cg01888566	0.0026	MEST;MEST;MEST;MEST;MEST;MEST;MESTIT1;MESTIT1_1	7	3254	3254		AIFM2		0	0	0	0	0	0	0
cg06827038	0.0026	WFIKKN2;WFIKKN2	17	1223	1223		AIM2		0	0	0	0	0	0	0
cg10194829	0.0026	FGF17;FGF17	8	548	548		AJAP1		0	0	0	0	0	0	0
cg10203483	0.0026	CAPG;SH2D6;SH2D6	2	2142	2142		AKAP13		0	0	0	0	0	0	0
cg13105904	0.0026	CBLN3;CBLN3;KHNYN;KHNYN;KHNYN;KHNYN	14	623	623		AKAP17A		0	0	0	0	0	0	0
cg14496375	0.0026	CLDND2;CLDND2;CLDND2;CTD-2616J11.11	19	1297	1297		AKAP4		0	0	0	0	0	0	0
cg18063149	0.0026	FMO3;FMO3;FMO3;FMO3;FMO3	1	4277	4277		AKNA		1	1	0	0	0	0	0
hsa-mir-1273h	0.0026	0					AKR7A2		0	1	0	0	0	0	0
hsa-mir-335	0.0026	0					AKT1		1	0	0	1	0	0	0
hsa-mir-3940	0.0026	0					AKT1S1		0	0	0	0	0	0	0
cg02793099	0.0025	PEG3;PEG3;PEG3;PEG3;PEG3;PEG3;PEG3;ZIM2;ZIM2;ZIM2	19	1434	1434		AKT2		1	1	0	1	0	0	0
cg03169715	0.0025	HAS3;HAS3;HAS3;HAS3;HAS3	16	1729	1729		ALCAM		0	0	0	0	0	0	0
cg03173722	0.0025	RUFY3;RUFY3;RUFY3;RUFY3	4	1790	1790		ALDH2		0	0	0	0	0	0	0
cg17119559	0.0025	GPR64;GPR64;GPR64;GPR64;GPR64;GPR64;GPR64;GPR64;GPR64;GPR64	23	478	478		ALDH3B1	inter+mi	1	0	0	0	0	0	0
cg25955816	0.0025	HIST3H3	1	5716	5716		ALDH5A1		0	0	0	0	0	0	0
cg27050763	0.0025	AHCTF1;AHCTF1;AHCTF1	1	6178	6178		ALDH6A1		0	0	0	0	0	0	0
cg00660989	0.0024	FAM179B;FAM179B;FAM179B;FAM179B;FAM179B;KLHL28;KLHL28;KLHL28;KLHL28;KLHL28	14	1136	1136		ALDOC		0	0	0	0	0	0	0
cg03679581	0.0024	RLN2;RLN2	9	133	133		ALG1	DB+intra+mi	0	0	0	0	0	0	0
cg12647320	0.0024	POGZ	1	3786	3786		ALG5		0	0	0	0	0	0	0
cg20304401	0.0024	PABPC1;PABPC1;PABPC1;PABPC1;PABPC1;PABPC1;PABPC1;PABPC1;PABPC1;PABPC1;PABPC1;PABPC1;PABPC1	8	2544	2544		ALMS1		0	0	0	0	0	0	0
cg21252483	0.0024	TULP2;TULP2;TULP2;TULP2;TULP2	19	1235	1235		ALOX15		0	0	0	1	0	0	0
cg23668631	0.0024	CAMKK1;CAMKK1;CAMKK1	17	95	95		ALOX5AP		0	0	0	0	0	0	0
ENSG00000143546.8	0.0024	0					ALOXE3		1	0	0	0	0	0	0
cg00294382	0.0023	IL23A;IL23A;IL23A	12	1419	1419		AMELX		0	0	0	0	0	0	0
cg09793866	0.0023	RP11-90P5.2;STAR;STAR	8	951	951		AMHR2		0	0	0	0	0	0	0
cg11851098	0.0023	WBP2NL;WBP2NL;WBP2NL;WBP2NL;WBP2NL;WBP2NL;WBP2NL	22	1060	1060		AMMECR1L		0	0	0	0	0	0	0
cg16343842	0.0023	CD99L2;CD99L2;CD99L2;CD99L2;CD99L2;CD99L2;CD99L2	23	3752	3752		AMOT		0	0	0	0	0	0	0
cg19258973	0.0023	0					AMPD2		0	0	0	0	0	0	0
cg21211608	0.0023	RAP1B;RAP1B;RAP1B;RAP1B;RAP1B;RAP1B;RAP1B;RAP1B;RAP1B;RAP1B;RAP1B;RAP1B;RAP1B;RAP1B;RAP1B;RAP1B;RAP1B;RAP1B;RAP1B;RAP1B;RAP1B;RAP1B;RAP1B;RAP1B;RAP1B;RAP1B;RAP1B;RAP1B;RAP1B;RAP1B;RAP1B	12	1726	1726		ANGEL2		0	0	0	0	0	0	0
cg23283495	0.0023	IRF6;IRF6	1	5250	5250		ANGPT4		0	0	0	0	0	0	0
cg26389232	0.0023	SNHG14;SNHG14;SNHG14;SNORD116-1	15	633	633		ANGPTL4		0	0	0	0	0	0	0
ENSG00000163220.10	0.0023	0					ANK1		1	1	0	0	0	0	0
cg01817393	0.0022	GNAS;GNAS;GNAS;GNAS;GNAS;GNAS;GNAS;GNAS;GNAS;GNAS;GNAS;GNAS;GNAS;GNAS;GNAS;GNAS;GNAS	20	1436	1436		ANK2		0	1	0	0	0	0	0
cg04273431	0.0022	GNL1;GNL1;PRR3	6	764	764		ANKRD17		0	0	0	0	0	0	0
cg10037068	0.0022	AC018890.6;AC018890.6;WIPF1;WIPF1;WIPF1;WIPF1;WIPF1;WIPF1;WIPF1	2	4388	4388		ANKRD28		0	0	0	0	0	0	0
cg11321895	0.0022	CHCHD7;CHCHD7;CHCHD7;CHCHD7;CHCHD7;CHCHD7;CHCHD7;CHCHD7;CHCHD7;CHCHD7;CHCHD7;CHCHD7;CHCHD7;CHCHD7;CHCHD7;CHCHD7;PLAG1;PLAG1;PLAG1;PLAG1	8	1429	1429		ANKRD54		0	0	0	0	0	0	0
cg12468189	0.0022	SRPK3;SRPK3;SRPK3;SRPK3;SRPK3;SRPK3;SRPK3	23	3827	3827		ANP32B		0	0	0	0	0	0	0
cg20748065	0.0022	POR;POR;POR;POR;POR;POR;POR;POR;POR;POR;POR;POR;POR;POR;POR	7	1890	1890		ANPEP		1	0	0	0	0	0	0
cg02060618	0.0021	BMP15	23	1267	1267		ANTXR2		0	0	0	0	0	0	0
cg04398978	0.0021	CBX4;CBX4;CBX4	17	1946	1946		ANXA1		0	0	0	1	0	0	0
cg15060177	0.0021	LIMD1-AS1;LIMD1-AS1;SACM1L;SACM1L;SACM1L;SACM1L;SACM1L;SACM1L;SACM1L;SACM1L;SACM1L;SACM1L	3	1144	1144		ANXA11		0	0	0	0	0	0	0
cg15301525	0.0021	ATP6V0D1;ATP6V0D1;ATP6V0D1;ATP6V0D1;ATP6V0D1;ATP6V0D1;ATP6V0D1;ATP6V0D1;ATP6V0D1;ATP6V0D1;RP11-297D21.4;RP11-297D21.4	16	1688	1688		ANXA2		0	0	0	1	0	0	0
cg16192575	0.0021	PTPN20A;PTPN20A;PTPN20A;PTPN20A;PTPN20A;PTPN20A;PTPN20A;PTPN20A;PTPN20A;PTPN20A;PTPN20A;PTPN20A;PTPN20A;PTPN20A;PTPN20A;PTPN20A;PTPN20A;PTPN20A;PTPN20A;PTPN20A;PTPN20A	10	1221	1221		AOC3		0	0	0	0	0	0	0
cg17586860	0.0021	RP4-753D10.3;SSTR4	20	576	576		AP1B1		0	0	0	0	0	0	0
cg20322862	0.0021	TGIF1;TGIF1;TGIF1;TGIF1;TGIF1	18	86	86		AP1M1		1	0	0	0	0	0	0
cg20767936	0.0021	ASNSD1;ASNSD1;ASNSD1;ASNSD1;ASNSD1;ASNSD1;ASNSD1;ASNSD1;ASNSD1	2	4764	4764		AP1S1		0	0	0	0	0	0	0
cg21610192	0.0021	DYNC1LI2;DYNC1LI2;DYNC1LI2;DYNC1LI2;DYNC1LI2;DYNC1LI2;RP11-61A14.4	16	1670	1670		AP1S3		0	0	0	0	0	0	0
cg22242539	0.0021	SERPINF1;SERPINF1;SERPINF1;SERPINF1;SERPINF1;SERPINF1;SERPINF1	17	42	42		AP2A1		0	0	0	0	0	0	0
cg24641737	0.0021	CHI3L2;DENND2D;DENND2D;DENND2D;DENND2D;DENND2D;DENND2D;DENND2D	1	2794	2794		AP2S1		0	0	0	0	0	0	0
							AP3B1		0	1	0	0	0	0	0
							APAF1		0	0	0	0	0	0	0
							APBB1		0	0	0	0	0	0	0
							APC		0	0	0	0	0	0	0
							APEH		0	0	0	0	0	0	0
							API5		0	0	0	0	0	0	0
							APLN		0	0	0	0	0	0	0
							APLP1	intra+mi	0	0	0	0	0	0	0
							APOBEC3C		0	0	0	0	0	0	0
							APOBEC3F		0	0	0	0	0	0	0
							APOC1		0	0	0	0	0	0	0
							APOH		0	0	0	0	0	0	0
							APOL2		0	0	0	0	0	0	0
							AQR		0	0	0	0	0	0	0
							AREG		0	0	0	0	0	0	0
							ARF3		1	0	0	0	0	0	0
							ARF6		0	0	0	0	0	0	0
							ARFGEF2		0	0	0	0	0	0	0
							ARG1		0	0	0	0	0	0	0
							ARHGAP19		0	0	0	0	0	0	0
							ARHGAP5		0	0	0	0	0	0	0
							ARHGDIA	intra+mi	0	0	0	0	0	0	0
							ARHGEF12		0	1	0	0	0	0	0
							ARHGEF17		0	0	0	0	0	0	0
							ARHGEF18		1	1	0	0	0	0	0
							ARHGEF2		0	0	0	0	0	0	0
							ARHGEF3		0	0	0	0	0	0	0
							ARHGEF4		0	0	0	0	0	0	0
							ARHGEF7		0	0	0	0	0	0	0
							ARID3A		1	0	0	0	0	0	0
							ARID5B		0	0	0	0	0	0	1
							ARL1		0	0	0	0	0	0	0
							ARL3		0	0	0	0	0	0	0
							ARL4C		0	0	0	0	0	0	0
							ARL8A	inter+mi	0	0	0	0	0	0	0
							ARPC3		0	0	0	0	0	0	0
							ARPC4		1	0	0	0	0	0	0
							ARPC5		0	0	0	0	0	0	0
							ARPC5L		0	0	0	0	0	0	0
							ARRB1		0	0	0	0	0	0	0
							ASB1		0	0	0	0	0	0	0
							ASGR1		0	0	0	0	0	0	0
							ASPH		0	0	0	0	0	0	0
							ASPN		0	0	0	0	0	0	0
							ASTN1		0	0	0	0	0	0	0
							ATF2		1	1	0	1	0	0	0
							ATF3		0	0	0	0	0	0	0
							ATF6		0	0	0	0	0	0	0
							ATF7IP		0	0	0	0	0	0	0
							ATG12		0	0	0	0	0	0	0
							ATG9A		0	0	0	0	0	0	0
							ATL1		0	0	0	0	0	0	0
							ATM		0	0	0	0	0	0	0
							ATOH1		0	0	0	0	0	0	0
							ATP10D		0	0	0	0	0	0	0
							ATP13A1		0	0	0	0	0	0	0
							ATP2A3		0	0	0	0	0	0	0
							ATP2B4		0	0	0	0	0	0	0
							ATP5A1		0	0	0	0	0	0	0
							ATP5B		0	0	0	0	0	0	0
							ATP5D		0	0	0	0	0	0	0
							ATP5G3		1	1	0	0	0	0	0
							ATP6AP1		0	0	0	0	0	0	0
							ATP6V0A1		0	0	0	0	0	0	0
							ATP6V0A2		0	0	0	0	0	0	0
							ATP6V1C1		0	0	0	0	0	0	0
							ATP7A		0	0	0	0	0	0	0
							ATP8A1		0	0	0	0	0	0	0
							ATP8B2		0	0	0	0	0	0	0
							ATP9A		0	0	0	0	0	0	0
							ATRIP		1	0	0	0	0	0	0
							ATXN10		0	0	0	0	0	0	0
							AURKB	inter+mi	0	0	0	0	0	0	0
							AUTS2		0	1	0	0	0	0	1
							AVP		1	0	0	0	0	0	0
							AVPR1A		0	0	0	0	0	0	0
							AVPR1B		0	0	0	0	0	0	0
							AXIN1		1	0	0	0	0	0	0
							AXL		0	0	0	0	1	0	0
							AZIN1		0	0	0	0	0	0	0
							B2M		0	0	0	1	0	1	1
							B3GALNT1		0	0	0	0	0	0	0
							B3GNT5		0	0	0	0	0	0	0
							B4GALT1	inter+mi	1	0	0	0	0	0	0
							B4GALT5		0	0	0	0	0	0	0
							B4GALT6		0	0	0	0	0	0	0
							BACH2		0	0	0	0	0	0	0
							BAG1		1	1	0	0	0	0	0
							BAG4	intra+mi	0	0	0	0	0	0	0
							BAG5		0	0	0	0	0	0	0
							BAK1		0	0	0	0	0	0	0
							BARHL1	inter+mi	0	0	0	0	0	0	0
							BASP1		0	0	0	0	0	0	0
							BAX	intra+mi	0	0	0	0	0	0	0
							BAZ1B	intra+mi	0	0	0	0	0	0	0
							BBC3		0	0	0	0	0	0	0
							BBS9		0	0	0	0	0	0	0
							BCAN		0	0	0	0	0	0	0
							BCAP29		0	0	0	0	0	0	0
							BCAR1		0	0	0	0	0	0	0
							BCL10		1	0	0	0	0	0	0
							BCL2		0	0	0	1	0	0	0
							BCL2A1		0	0	0	0	0	0	0
							BCL2L1		0	0	0	1	0	0	0
							BCL2L11		0	0	0	1	0	0	0
							BCL2L12		0	0	0	0	0	0	0
							BCL2L15		0	0	0	0	0	0	0
							BCL2L2		0	0	0	0	0	0	0
							BCL3		0	0	0	0	0	0	0
							BCL6		0	0	0	1	0	0	0
							BCL6B		0	0	0	0	0	0	0
							BCL7A	inter+mi	0	0	0	0	0	0	0
							BCL7B		0	0	0	0	0	0	0
							BCLAF1		0	0	0	0	0	0	0
							BCOR		0	0	0	0	0	0	0
							BDNF		0	0	0	0	0	0	0
							BEX2		0	0	0	0	0	0	0
							BFAR		0	0	0	0	0	0	0
							BIK		0	0	0	0	0	0	0
							BIN1		1	0	0	0	0	0	0
							BIRC5		0	0	0	1	0	0	0
							BLCAP	DB+intra+mi	0	0	0	0	0	0	0
							BLOC1S3		0	0	0	0	0	0	0
							BMF		0	0	0	0	0	0	0
							BMI1		0	0	0	0	0	0	0
							BMP1		0	0	0	0	0	0	0
							BMP15		0	0	0	0	0	0	0
							BMP2		0	0	0	0	0	0	0
							BMP3		0	0	0	0	0	0	0
							BMP6		0	0	0	0	0	0	0
							BMP7		0	0	0	0	0	0	0
							BMPR1A		0	0	0	0	0	0	0
							BMPR1B		0	0	0	0	0	0	0
							BMPR2		0	0	0	0	0	0	0
							BNIP2		0	0	0	0	0	0	0
							BNIP3		0	0	0	0	0	0	0
							BOC		0	0	0	0	0	0	0
							BPIFA1		0	0	0	0	0	0	0
							BRCA1		0	0	0	0	0	0	0
							BSG		1	0	0	0	0	0	0
							BTBD9	inter+mi	0	1	0	0	0	0	0
							BTC		0	0	0	0	0	0	0
							BTD		0	0	0	0	0	0	0
							BTF3		0	0	0	0	0	0	0
							BTF3L4		0	0	0	0	0	0	0
							BTG1		0	0	0	0	0	0	1
							BTG2		0	0	0	0	1	0	0
							BTLA		0	0	0	0	0	0	0
							BTN2A1		0	0	0	0	0	0	0
							BTN3A1		0	0	0	0	0	0	0
							BTN3A3		0	0	0	0	0	0	0
							BTRC		0	0	0	1	0	0	0
							BUB1		0	0	0	0	0	0	0
							BUB1B		0	0	0	0	0	0	0
							BVES		0	0	0	0	0	0	0
							BZW1		0	0	0	0	0	0	0
							C11orf58		0	0	0	0	0	0	0
							C12orf10		0	0	0	0	0	0	0
							C12orf57		1	0	0	0	0	0	0
							C15orf39		0	0	0	0	0	0	0
							C16orf58		0	0	0	0	0	0	0
							C16orf72		0	0	0	0	0	0	0
							C17orf59		0	0	0	0	0	0	0
							C19orf24		0	0	0	0	0	0	0
							C1QA		1	0	0	0	0	0	0
							C1QTNF1		0	0	0	0	0	0	0
							C1QTNF6		1	0	0	0	0	0	0
							C1S		0	0	0	0	0	1	1
							C2	inter+mi	0	0	0	0	0	0	0
							C20orf27		1	0	0	0	0	0	0
							C21orf33		0	0	0	0	0	0	0
							C21orf59		0	0	0	0	0	0	0
							C21orf91		0	0	0	0	0	0	0
							C2CD2L		1	0	0	0	0	0	0
							C3		0	0	1	0	0	0	0
							C5AR1	intra+mi	0	0	0	0	1	0	0
							C6orf48		0	0	0	0	0	0	0
							C7		0	0	0	0	0	0	0
							C8A		0	0	0	0	0	0	0
							C8G	inter+mi	0	0	0	0	0	0	0
							C8orf4		0	0	0	0	0	0	0
							CAB39		0	0	0	0	0	0	0
							CACNA1A		0	0	0	0	0	0	0
							CACNB3		0	0	0	0	0	0	0
							CADM1		0	0	0	0	0	0	0
							CADM2		0	1	0	0	0	0	0
							CADPS		0	0	0	0	0	0	0
							CADPS2		0	0	0	0	0	0	0
							CALM1		0	0	0	0	0	0	0
							CALM2		0	0	0	0	0	0	0
							CALM3		0	0	0	0	0	0	0
							CALR		0	0	0	0	0	0	0
							CAMK1		1	0	0	0	0	0	0
							CAMK2A		1	0	0	1	0	0	0
							CAMK2G		0	0	0	1	0	0	0
							CAMKK2		0	0	0	0	0	0	0
							CAMLG		0	0	0	0	0	0	0
							CAMP		1	0	0	0	0	0	0
							CAMSAP1		0	0	0	0	0	0	0
							CAND1		0	0	1	0	0	0	0
							CAP1		0	0	0	0	0	0	0
							CAPN1		0	0	0	0	0	0	0
							CAPN7	inter+mi	0	0	0	0	0	0	0
							CAPRIN1		1	0	0	0	0	0	0
							CAPZA1		0	0	0	1	0	0	0
							CAPZA2		0	0	0	0	0	0	0
							CARD10		0	0	0	0	0	0	0
							CARD6		0	0	0	0	0	0	0
							CASP10		0	0	1	0	0	0	0
							CASP14		0	0	0	0	0	0	0
							CASP2		0	0	0	0	0	0	0
							CASP8		0	0	0	0	0	1	1
							CASP9		0	0	0	0	0	0	0
							CASQ1		0	0	0	0	0	0	0
							CAST		0	0	0	0	0	0	0
							CAV1		0	0	0	0	0	0	0
							CBFB		0	1	0	0	0	0	0
							CBR4		0	0	0	0	0	0	0
							CBX3		0	0	0	0	0	0	0
							CBX4	DB+intra+mi	0	0	0	0	0	0	0
							CBY1		0	0	0	0	0	0	0
							CCAR1		0	0	0	0	0	0	0
							CCBE1		0	0	1	0	0	0	0
							CCDC14		0	0	0	0	0	0	0
							CCDC6		0	1	0	0	0	0	0
							CCKBR		0	0	0	0	0	0	0
							CCL1		0	0	0	0	0	0	0
							CCL19		1	1	0	1	0	0	0
							CCL2		0	0	0	1	1	0	1
							CCL20		0	0	0	1	1	0	0
							CCL22		1	0	0	1	1	0	0
							CCL24		0	0	0	0	1	0	0
							CCL25		0	0	0	0	0	0	0
							CCL26		1	0	0	0	0	0	0
							CCL3		0	0	0	1	0	0	0
							CCNA2		0	0	0	0	0	0	0
							CCND1		0	0	0	1	0	0	0
							CCND2		0	0	0	0	0	0	0
							CCNE1		0	0	0	0	0	0	0
							CCNG1		0	0	0	0	0	0	0
							CCNT1		0	0	0	0	0	0	0
							CCPG1		0	0	0	0	0	0	0
							CCR1		0	0	0	1	0	0	0
							CCR2		0	0	0	1	0	0	0
							CCR4		0	0	0	0	0	0	0
							CCR7		0	0	0	0	1	0	0
							CCR9		0	0	0	0	0	0	0
							CCT3	inter+mi	0	0	0	0	0	0	0
							CCT6A		0	0	0	0	0	0	0
							CCT7		0	0	0	0	0	0	0
							CD101		0	0	0	0	0	0	0
							CD109		0	0	0	0	0	0	0
							CD14	inter+mi	0	0	0	0	1	0	0
							CD151		1	0	0	0	0	0	0
							CD160		0	0	0	0	0	0	0
							CD164		0	0	0	0	0	0	0
							CD164L2		0	0	0	0	0	0	0
							CD177		0	0	0	0	0	0	0
							CD180		0	0	0	0	0	0	0
							CD1D		0	0	0	0	0	0	0
							CD22		0	0	0	0	0	0	0
							CD226		0	0	0	0	0	0	0
							CD27		0	0	0	1	0	0	0
							CD274		0	0	0	0	0	0	1
							CD276		0	0	0	0	0	0	0
							CD2AP		0	0	0	0	0	0	0
							CD300C		0	0	0	0	0	0	0
							CD300LD		0	0	0	0	0	0	0
							CD33		0	0	0	0	0	0	0
							CD34		0	1	0	0	0	0	0
							CD36		0	0	0	1	0	0	0
							CD37		0	0	0	0	0	0	0
							CD38		0	0	0	0	0	0	1
							CD3D		0	0	0	0	0	0	0
							CD4		1	1	0	1	0	0	0
							CD44		0	0	0	1	0	0	0
							CD46		0	0	0	0	0	0	0
							CD47		0	0	0	0	0	1	0
							CD5L		0	0	0	0	0	0	0
							CD63		0	0	0	0	0	0	0
							CD69		0	0	0	0	1	0	1
							CD79A		0	0	0	0	0	0	0
							CD8A		0	0	0	0	0	0	0
							CD9		0	0	0	0	0	0	0
							CD93		0	0	0	0	0	0	0
							CD96		0	0	0	0	0	0	0
							CD97		1	0	0	0	0	0	0
							CD99L2	DB+mi	0	0	0	0	0	0	0
							CDA		0	0	0	0	0	0	0
							CDADC1		0	0	0	0	0	0	0
							CDC23		0	0	0	0	0	0	0
							CDC25A	inter+mi	1	0	0	0	0	0	0
							CDC25B		1	0	0	0	0	0	0
							CDC37		0	0	0	0	0	0	0
							CDC42		0	0	0	1	0	0	0
							CDC42SE1		0	0	0	0	0	0	0
							CDC42SE2		0	0	0	0	0	0	0
							CDC73		0	0	0	0	0	0	0
							CDH11		0	0	0	0	0	0	0
							CDH13		0	1	0	0	0	0	0
							CDH19		0	0	0	0	0	0	0
							CDH2		0	0	0	0	0	0	0
							CDH20		0	0	0	0	0	0	0
							CDH23		1	0	1	0	0	0	0
							CDH26		1	0	0	0	0	0	0
							CDH3		0	0	0	0	0	0	0
							CDH4		0	0	0	0	0	0	0
							CDH5		0	0	0	0	0	0	0
							CDH7		0	0	0	0	0	0	0
							CDHR2		1	0	0	0	0	0	0
							CDHR5		1	0	0	0	0	0	0
							CDK1		0	0	0	0	0	0	0
							CDK19		0	0	0	0	0	0	0
							CDK2	inter+mi	0	0	0	0	0	0	0
							CDK2AP1		0	0	0	0	0	0	0
							CDK4		0	0	0	0	0	0	0
							CDK5		0	0	0	0	0	0	0
							CDK5R1		0	0	0	0	0	0	0
							CDK6		0	0	0	0	0	0	0
							CDK9		1	0	0	0	0	0	0
							CDKAL1		0	0	0	0	0	0	0
							CDKN1A		0	0	0	1	1	0	1
							CDKN1B		1	0	0	1	0	0	0
							CDKN1C		1	0	0	0	0	0	0
							CDKN2A		0	0	0	0	0	0	0
							CDKN2AIP		0	0	0	0	0	0	0
							CDON		0	0	0	0	0	0	0
							CDV3		0	0	0	0	0	0	0
							CDX1		0	0	0	0	0	0	0
							CDX2		0	0	0	0	0	0	0
							CEACAM21		0	0	0	0	0	0	0
							CEACAM3		0	0	0	0	0	0	0
							CEACAM5		0	0	0	0	0	0	0
							CEACAM8		0	0	0	0	0	0	0
							CEBPA		0	1	0	0	0	0	0
							CEBPB		0	0	0	0	0	0	0
							CEBPD		0	0	0	1	0	0	0
							CEBPG		0	0	0	0	0	0	0
							CELSR3		0	1	0	0	0	0	0
							CERCAM		0	0	0	0	0	0	0
							CERK		1	0	0	0	0	0	0
							CES2		0	0	0	0	0	0	0
							CFB	inter+mi	0	0	0	0	0	0	1
							CFHR2		0	0	0	0	0	0	0
							CFI		0	0	0	0	0	0	0
							CFP		0	0	0	0	0	0	0
							CFTR		0	0	0	0	0	0	0
							CHAC1		1	0	0	0	0	0	0
							CHCHD3		0	0	0	0	0	0	0
							CHD8		0	0	0	0	0	0	0
							CHD9		0	0	0	0	0	0	0
							CHERP		0	0	0	0	0	0	0
							CHL1		0	0	0	0	0	0	0
							CHMP2A		0	0	0	0	0	0	0
							CHMP5		1	1	0	0	0	0	0
							CHRD		0	0	0	0	0	0	0
							CHRNA7		0	0	0	0	0	0	0
							CHST11		0	0	0	0	0	0	0
							CHST6		0	0	0	0	0	0	0
							CHSY1		0	0	0	0	0	0	0
							CIAO1		0	0	0	0	0	0	0
							CIAPIN1		0	0	0	0	0	0	0
							CIDEB		1	0	0	0	0	0	0
							CIITA		0	0	0	1	0	0	1
							CIRBP	inter+mi	0	0	0	0	0	0	0
							CITED2		0	0	0	0	0	0	0
							CKAP4		0	0	0	0	0	0	0
							CLCC1		0	0	0	0	0	0	0
							CLCN3		1	0	0	0	0	0	0
							CLCN5		0	0	0	0	0	0	0
							CLCN7		0	0	0	0	0	0	0
							CLDN1		0	0	0	0	0	0	0
							CLDN12		0	0	0	0	0	0	0
							CLDN14		0	0	0	0	0	0	0
							CLDN4		0	0	0	0	0	0	0
							CLDN7		0	0	0	0	0	0	0
							CLEC11A		0	0	0	0	0	0	0
							CLEC2D		0	0	0	0	0	0	0
							CLEC7A		0	0	0	0	0	0	0
							CLIC4		0	0	0	0	0	0	0
							CLINT1		1	0	0	0	0	0	0
							CLIP1		0	0	0	0	0	0	0
							CLIP2		0	0	0	0	0	0	0
							CLIP4		0	0	0	0	0	0	0
							CLN8		0	1	0	0	0	0	0
							CLNS1A		0	0	0	0	0	0	0
							CLPTM1L		0	0	0	0	0	0	0
							CLSTN1		0	0	0	0	0	0	0
							CLTA		0	0	0	0	0	0	0
							CLTC	inter+mi	1	0	0	0	0	0	0
							CLU		0	0	0	0	0	0	0
							CMTM1		0	0	0	0	0	0	0
							CMTM3		0	0	0	0	0	0	0
							CMTM4	intra+mi	0	0	0	0	0	0	0
							CMTM6		0	0	0	0	0	0	0
							CNBP		1	0	0	0	0	0	0
							CNDP2		0	1	0	0	0	0	0
							CNIH4		0	0	0	0	0	0	0
							CNOT4		0	0	0	0	0	0	0
							CNOT6L		0	1	0	0	0	0	0
							CNTNAP3		0	0	0	0	0	0	0
							CNTNAP3B		0	0	0	0	0	0	0
							CNTRL		0	0	0	0	0	0	0
							COBRA1		1	0	0	0	0	0	0
							COIL		0	0	0	0	0	0	0
							COL11A1		0	0	0	0	0	0	0
							COL12A1		0	0	0	0	0	0	0
							COL15A1		0	1	0	0	0	0	0
							COL1A1		0	0	0	0	0	0	0
							COL21A1		0	0	0	0	0	0	0
							COL27A1		1	0	0	0	0	0	0
							COL3A1		0	0	0	0	0	0	0
							COL4A1		1	0	0	0	0	0	0
							COL4A3BP		0	0	0	0	0	0	0
							COL5A1		0	1	0	0	0	0	0
							COL6A1		0	0	0	0	0	0	0
							COL6A5		0	1	0	0	0	0	0
							COL6A6		0	0	0	0	0	0	0
							COL8A1		0	0	0	0	0	0	0
							COL8A2		0	0	0	0	0	0	0
							COL9A1		0	0	0	0	0	0	0
							COL9A2		0	0	0	0	0	0	0
							COLEC12		0	0	0	0	0	0	0
							COMMD2		0	0	0	0	0	0	0
							COMMD9		0	0	0	0	0	0	0
							COPS5		0	0	0	0	0	0	0
							COPZ1		0	0	0	0	0	0	0
							COQ7		0	0	0	0	0	0	0
							CORO1A		0	0	0	0	0	0	0
							CORO1C		0	0	0	0	0	0	0
							CORO2A		1	0	0	0	0	0	0
							CORO7	inter+mi	0	0	0	0	0	0	0
							COTL1		1	0	0	0	0	0	0
							COX5A		1	0	0	0	0	0	0
							COX6B1		0	0	0	0	0	0	0
							COX8A		0	0	0	0	0	0	0
							CPEB4		0	0	0	0	0	0	0
							CPLX3		1	0	0	0	0	0	0
							CPOX		0	0	0	0	0	0	0
							CPS1		0	0	0	0	0	0	0
							CPSF1		0	0	0	0	0	0	0
							CPT1A		0	0	0	0	0	0	0
							CRCP		0	0	0	0	0	0	0
							CREB1		0	0	0	1	0	0	0
							CRIP1		1	0	0	0	0	0	0
							CRISPLD2		1	1	0	0	0	0	0
							CRK		0	0	0	1	0	0	0
							CRKL		1	0	0	1	0	0	0
							CRLF3		0	0	0	0	0	0	0
							CRNN		0	0	0	0	0	0	0
							CRTAM		0	0	0	0	0	0	0
							CRTAP		0	0	0	0	0	0	0
							CS	intra+mi	0	0	0	0	0	0	0
							CSF1		0	0	0	1	1	1	0
							CSF1R		0	0	0	1	0	0	0
							CSK		1	0	0	1	0	0	0
							CSNK1D		1	0	0	0	0	0	0
							CSNK2A1		1	0	0	0	0	0	0
							CSNK2A2		0	0	0	0	0	0	0
							CST2		0	0	0	0	0	0	0
							CST3		0	0	0	0	0	0	0
							CST4		0	0	0	0	0	0	0
							CTBP1		0	0	0	0	0	0	0
							CTBP2		0	0	0	0	0	0	0
							CTCF		0	0	0	0	0	0	0
							CTGF		0	0	0	0	0	0	0
							CTNNBIP1		0	0	0	0	0	0	0
							CTNND1		0	0	0	0	0	0	0
							CTSA		0	0	0	0	0	0	0
							CTSC		0	0	0	0	0	0	0
							CTSD		0	0	0	0	0	0	0
							CTSF		0	0	0	0	0	0	0
							CTSW		1	0	0	0	0	0	0
							CUL4A		0	0	0	0	0	0	0
							CUL7		0	0	0	0	0	0	0
							CXCL1		0	0	0	1	0	0	0
							CXCL10		1	0	0	1	1	1	1
							CXCL12		0	0	0	0	0	0	0
							CXCL16		0	0	0	0	0	0	0
							CXCL2		0	0	0	1	0	0	0
							CXCL3		0	0	0	0	0	0	0
							CXCL9		1	0	0	0	1	0	1
							CXCR1		0	1	0	0	0	0	0
							CXCR2		0	0	0	0	0	0	0
							CXCR4		0	0	0	0	0	0	0
							CYB561		0	0	0	0	0	0	0
							CYCS		0	0	0	0	0	0	0
							CYFIP2		1	0	0	0	0	0	0
							CYLD		0	0	0	0	0	0	0
							CYP11A1		0	0	0	0	0	0	0
							CYP19A1		0	0	0	0	0	0	0
							CYP1A1		1	0	0	0	0	0	0
							CYP1B1		0	0	0	0	0	0	0
							CYP26A1		0	0	0	0	0	0	0
							CYP2E1		0	1	0	0	0	0	0
							CYP4V2		0	0	0	0	0	0	0
							CYP7B1		0	0	0	0	0	0	0
							CYR61		0	0	0	0	0	0	0
							CYSLTR1		0	0	0	0	0	0	0
							CYSLTR2		0	0	0	0	0	0	0
							CYTH1		0	0	0	0	0	0	0
							CYTH2		0	0	0	0	0	0	0
							CYTH3		0	0	0	0	0	0	0
							CYTIP		0	0	0	0	0	0	0
							CYTL1		0	0	0	0	0	0	0
							DAD1		0	0	0	0	0	0	0
							DAP		0	0	0	0	0	0	0
							DAPK1		1	0	0	0	0	0	0
							DAPK2		0	0	0	0	0	0	0
							DARS		0	0	0	0	0	0	0
							DAXX		0	0	0	0	0	0	0
							DBH		0	0	0	0	0	0	0
							DCBLD2		0	0	0	0	1	0	0
							DCHS2		0	0	0	0	0	0	0
							DCSTAMP		0	0	0	0	0	0	0
							DCUN1D3		0	0	0	0	0	0	0
							DDHD2		0	0	0	0	0	0	0
							DDIT3		0	0	0	0	0	0	0
							DDIT4	inter+mi	0	0	0	0	0	0	0
							DDR1		0	0	0	0	0	0	0
							DDR2		0	0	0	0	0	0	0
							DDT		0	0	0	0	0	0	0
							DDX19B		0	0	0	0	0	0	0
							DDX3X		0	0	0	0	0	0	0
							DDX41		0	0	0	0	0	0	0
							DDX42		0	0	0	0	0	0	0
							DDX5		1	0	0	0	0	0	0
							DDX50		1	0	0	0	0	0	0
							DDX60		0	0	0	0	0	1	1
							DEDD		0	0	0	0	0	0	0
							DEFA4		0	0	0	0	0	0	0
							DEFB104A		0	0	0	0	0	0	0
							DEFB104B		0	0	0	0	0	0	0
							DEFB106A		0	0	0	0	0	0	0
							DEFB106B		0	0	0	0	0	0	0
							DEFB118		0	0	0	0	0	0	0
							DEFB123		0	0	0	0	0	0	0
							DEFB125		0	0	0	0	0	0	0
							DEFB126		0	0	0	0	0	0	0
							DEFB132		0	0	0	0	0	0	0
							DEFB4A		0	0	0	0	0	0	0
							DEFB4B		0	0	0	0	0	0	0
							DEK		0	1	0	0	0	0	0
							DENND3		0	0	0	0	0	0	0
							DENR		1	0	0	0	0	0	0
							DERL1		0	0	0	0	0	0	0
							DFFA		0	0	0	0	0	0	0
							DGKA		0	0	0	0	0	0	0
							DGKH		0	0	0	0	0	0	0
							DHCR24		0	0	0	0	0	0	0
							DHDH		0	0	0	0	0	0	0
							DHODH		0	0	0	0	0	0	0
							DHRS13		0	0	0	0	0	0	0
							DHX15		0	0	0	0	0	0	0
							DHX33		0	0	0	0	0	0	0
							DHX34		0	0	0	0	0	0	0
							DHX58		0	0	0	0	0	1	1
							DICER1		1	0	0	0	0	0	0
							DISC1		0	0	0	0	0	0	0
							DLC1		0	0	0	0	0	0	0
							DLG1		0	0	0	0	0	0	0
							DLK1	DB+intra+mi	0	0	0	0	0	0	0
							DLL1		0	0	0	0	0	0	0
							DNAJA1		1	0	0	0	0	0	0
							DNAJA3		0	0	0	0	0	0	0
							DNAJB13		0	0	0	0	0	0	0
							DNAJB6		0	0	0	0	0	0	0
							DNAJB9		0	0	0	0	0	0	0
							DNAJC10		0	0	0	0	0	0	0
							DNAJC3		0	0	0	0	0	0	0
							DNAJC9		0	0	0	0	0	0	0
							DNASE1L3		0	0	0	0	0	0	0
							DNM1L		0	0	0	0	0	0	0
							DNMT1		0	0	0	0	0	0	0
							DNPEP		0	0	0	0	0	0	0
							DOCK10		0	1	0	0	0	0	0
							DOCK11		0	0	0	0	0	0	0
							DOCK4		0	0	0	0	0	0	0
							DOCK5		0	0	0	0	0	0	0
							DOCK6		1	0	0	0	0	0	0
							DOCK7		0	0	0	0	0	0	0
							DOCK9		0	0	0	0	0	0	0
							DOK3		0	0	0	0	0	0	0
							DOPEY2		1	0	0	0	0	0	0
							DPH2		0	0	0	0	0	0	0
							DPM3		1	0	0	0	0	0	0
							DPP7		1	0	0	0	0	0	0
							DRAM2		0	0	0	0	0	0	0
							DRAP1		1	0	0	0	0	0	0
							DRD5		0	0	0	0	0	0	0
							DSC2		0	0	0	0	0	0	0
							DSCR3		1	0	0	0	0	0	0
							DSE		0	0	0	0	0	0	0
							DSG2		0	0	0	0	0	0	0
							DST		0	0	0	0	0	0	0
							DTX4		0	0	0	0	0	0	0
							DUS1L		0	0	0	0	0	0	0
							DUSP1		0	0	0	0	0	0	0
							DUSP10		0	0	0	0	0	0	0
							DUSP16		0	0	0	0	0	0	0
							DUSP19		0	0	0	0	0	0	0
							DUSP22		0	0	0	0	0	0	0
							DUSP4		0	0	0	1	0	0	0
							DUSP5		0	0	0	0	0	0	0
							DUSP6		0	0	0	1	0	0	0
							DUSP7		0	0	0	1	0	0	0
							DUSP8		0	0	0	0	0	0	0
							DVL1		0	0	0	0	0	0	0
							DVL3		1	0	0	0	0	0	0
							DYNC1LI1		0	0	0	0	0	0	0
							DYNC1LI2	DB+intra+mi	0	0	0	0	0	0	0
							DYNLL1		0	0	0	0	0	0	0
							DYRK1A		0	0	0	0	0	0	0
							DYRK1B		0	0	0	0	0	0	0
							DYRK2		0	0	0	0	0	0	0
							E2F1		0	0	0	0	0	0	0
							E2F2		0	0	0	0	0	0	0
							E2F3		0	0	0	0	0	0	0
							EBF1		0	1	0	0	0	0	0
							ECE1		0	0	0	0	0	0	0
							ECSCR		0	0	0	0	0	0	0
							EDEM1		0	0	0	0	0	0	0
							EDF1		1	0	0	0	0	0	0
							EDIL3		0	0	0	0	0	0	0
							EDN1		0	0	0	0	1	0	0
							EEF1A1		0	0	0	0	0	0	0
							EEF1G		1	0	0	0	0	0	0
							EEF2K		0	0	0	0	0	0	0
							EFNA1	inter+mi	1	0	0	0	0	0	0
							EFNB2		0	0	0	0	0	0	0
							EFTUD2		0	0	0	0	0	0	0
							EGFR		0	0	1	0	0	0	0
							EGLN1		0	0	0	0	0	0	0
							EGR3		1	0	0	0	0	0	0
							EHBP1L1	inter+mi	1	0	0	0	0	0	0
							EHD2		0	0	0	0	0	0	0
							EHD4		0	0	0	0	0	0	0
							EHMT1		1	0	0	0	0	0	0
							EHMT2	inter+mi	0	0	0	0	0	0	0
							EI24		0	0	0	0	0	0	0
							EIF1AX		0	0	0	0	0	0	0
							EIF2AK3		0	0	0	0	0	0	0
							EIF2S1		0	0	0	0	0	0	0
							EIF2S3		0	0	0	0	0	0	0
							EIF4A2		0	0	0	1	0	0	0
							EIF4A3		0	0	0	1	0	0	0
							EIF4E		0	0	0	1	0	0	0
							EIF4EBP2		0	0	0	0	0	0	0
							EIF4G3		0	0	0	1	0	0	0
							EIF5		0	0	0	0	0	0	0
							ELAVL1		0	0	0	0	0	0	0
							ELK4		0	0	0	0	0	0	0
							ELMO1		1	1	0	0	0	0	0
							ELMO2		0	0	0	0	0	0	0
							ELMOD2		0	0	0	0	0	0	0
							ELMOD3		0	0	0	0	0	0	0
							ELP2		0	0	0	0	0	0	0
							EN2		0	0	0	0	0	0	0
							ENPP2		0	0	0	0	0	0	0
							ENTPD1		0	0	0	0	0	0	0
							ENTPD2		1	0	0	0	0	0	0
							ENTPD3		0	0	0	0	0	0	0
							ENTPD5		0	0	0	0	0	0	0
							EP300		0	0	0	0	0	0	0
							EPHB4		0	0	0	0	0	0	0
							EPN2		1	0	0	0	0	0	0
							EPOR		0	0	0	0	0	0	0
							ERAP1		0	0	0	0	0	0	0
							ERBB2		1	0	0	0	0	0	0
							ERBB3		0	0	0	0	0	0	0
							ERC1		0	1	0	0	0	0	0
							EREG		0	0	0	0	1	0	0
							ERGIC2		0	0	0	0	0	0	0
							ERN1		0	0	0	0	0	0	0
							ERRFI1		0	0	0	0	0	0	0
							ESAM		0	0	0	0	0	0	0
							ESCO1		0	0	0	0	0	0	0
							ESR1		0	1	0	0	0	0	0
							ESR2		0	0	0	0	0	0	0
							ESRRB		0	0	0	0	0	0	0
							ETNK1		0	0	0	0	0	0	0
							ETS1		0	0	0	0	0	0	0
							ETV5		1	0	0	0	0	0	0
							EXOC2		0	0	0	0	0	0	0
							EXOC3		1	0	0	0	0	0	0
							EXOC5		0	0	0	0	0	0	0
							EXOC8		0	0	0	0	0	0	0
							EXOSC1		0	0	0	0	0	0	0
							EXOSC8		0	0	0	0	0	0	0
							EXTL3		0	0	0	0	0	0	0
							F10		0	0	0	0	0	0	0
							F11R		0	0	0	0	0	0	0
							F13B		0	0	0	0	0	0	0
							F2		0	0	0	0	0	0	0
							F2RL1		0	0	0	0	0	0	0
							F2RL2	DB+mi	0	0	0	0	0	0	0
							F3		0	0	0	0	1	0	0
							FABP4		0	0	0	0	0	0	0
							FADD		0	0	0	0	0	0	0
							FAF1		0	0	0	0	0	0	0
							FAHD1		0	0	0	0	0	0	0
							FAM102A		1	0	0	0	0	0	0
							FAM104A		0	0	0	0	0	0	0
							FAM108A1		1	0	0	0	0	0	0
							FAM122B		0	0	0	0	0	0	0
							FAM35A		0	0	0	0	0	0	0
							FAM3B		0	0	0	0	0	0	0
							FAM3C		0	0	0	0	0	0	0
							FAM96B		0	0	0	0	0	0	0
							FAM98A		0	0	0	0	0	0	0
							FANCF		0	0	0	0	0	0	0
							FANCI		0	0	0	0	0	0	0
							FAS		0	0	0	0	0	0	1
							FASLG		0	0	0	1	0	0	0
							FASTK		1	0	0	0	0	0	0
							FASTKD5		1	0	0	0	0	0	0
							FAT3		0	0	0	0	0	0	0
							FBLIM1		0	0	0	0	0	0	0
							FBLN5		1	0	0	0	0	0	0
							FBXL16		1	0	0	0	0	0	0
							FBXO21		0	1	0	0	0	0	0
							FBXW2		0	0	0	0	0	0	0
							FCF1		0	0	0	0	0	0	0
							FCGRT		0	0	0	0	0	0	0
							FCHO2		0	0	0	0	0	0	0
							FCHSD1		1	0	0	0	0	0	0
							FCN3		0	0	0	0	0	0	0
							FCRL4		1	0	0	0	0	0	0
							FCRLA		0	0	0	0	0	0	0
							FDFT1		0	0	0	0	0	0	0
							FDPS		1	0	0	0	0	0	0
							FEM1B		0	0	0	0	0	0	0
							FEM1C		0	0	0	0	0	0	0
							FEN1		0	0	0	0	0	0	0
							FERMT2		0	0	0	0	0	0	0
							FEZ2		0	0	0	0	0	0	0
							FGD2		1	0	0	0	0	0	0
							FGD3		0	0	0	0	0	0	0
							FGD4		0	0	0	0	0	0	0
							FGF1		0	0	0	0	0	0	0
							FGF10		0	0	0	0	0	0	0
							FGF16		0	0	0	0	0	0	0
							FGF17	DB+intra+mi	1	0	0	0	0	0	0
							FGF2		0	0	0	1	0	0	0
							FGF22		1	0	0	0	0	0	0
							FGF23		0	0	0	0	0	0	0
							FGF4		0	0	0	0	0	0	0
							FGF8		0	0	0	0	0	0	0
							FGFR2		0	1	0	0	0	0	0
							FGFR3		0	0	0	0	0	0	0
							FGL2		0	0	0	0	0	0	1
							FKBP14		0	0	0	0	0	0	0
							FKBP15		0	0	0	0	0	0	0
							FKBP1A		0	0	0	0	0	0	0
							FKBP1B		0	0	0	0	0	0	0
							FKBP5	inter+mi	0	0	0	0	0	0	0
							FKBP7		0	0	0	0	0	0	0
							FKBP8		0	0	1	0	0	0	0
							FLNA		0	0	0	1	0	0	0
							FLOT2	intra+mi	0	0	0	0	0	0	0
							FLT3		0	1	1	1	0	0	0
							FLVCR1		0	0	0	0	0	0	0
							FLVCR2		0	0	0	0	0	0	0
							FMOD		0	0	0	0	0	0	0
							FMR1		0	0	0	0	0	0	0
							FN1		0	0	1	1	0	0	0
							FNBP1	inter+mi	0	0	0	0	0	0	0
							FNBP4		0	0	0	0	0	0	0
							FNDC3A		0	0	0	0	0	0	0
							FNDC3B		0	0	0	0	0	0	0
							FOLR1		0	0	0	0	0	0	0
							FOS		0	0	0	1	0	0	0
							FOSL2		0	0	0	0	0	0	0
							FOXA2		0	0	0	0	0	0	0
							FOXC1		0	0	0	0	0	0	0
							FOXD2		0	0	0	0	0	0	0
							FOXD3		0	0	0	0	0	0	0
							FOXK2	inter+mi	1	0	0	0	0	0	0
							FOXN2		0	0	0	0	0	0	0
							FOXO1		0	0	0	1	0	0	0
							FOXO3		0	0	0	1	0	0	0
							FOXO4		0	0	0	0	0	0	0
							FOXP1		0	1	0	0	0	0	0
							FOXP3		0	0	0	0	0	0	0
							FOXQ1		0	0	0	0	0	0	0
							FPR1		0	0	0	1	1	0	1
							FRAT2		0	0	0	0	0	0	0
							FREM1		0	0	0	0	0	0	0
							FRG1		0	0	0	0	0	0	0
							FRK		0	0	0	0	0	0	0
							FRS2		0	0	0	0	0	0	0
							FSCN1		0	0	0	1	0	0	0
							FSCN2		0	0	0	0	0	0	0
							FSTL3		1	0	0	0	0	0	0
							FTL	intra+mi	0	0	0	0	0	0	0
							FTO		0	0	0	0	0	0	0
							FTSJ1		0	0	0	0	0	0	0
							FUBP3		0	0	0	0	0	0	0
							FURIN		0	0	0	0	0	0	0
							FUT7		1	0	0	0	0	0	0
							FXR1		0	0	0	0	0	0	0
							FZD1		0	0	0	0	0	0	0
							FZD4		0	0	0	0	0	0	0
							FZD5		0	0	0	0	1	0	0
							G2E3		0	0	0	0	0	0	0
							G3BP1		0	0	0	0	0	0	0
							G3BP2		0	0	0	0	0	0	0
							G6PD		0	0	0	0	0	0	0
							GAB2		0	0	0	1	0	0	0
							GAGE1		0	0	0	0	0	0	0
							GAK		0	0	0	0	0	0	0
							GALR1		0	0	0	0	0	0	0
							GAPVD1		0	0	0	0	0	0	0
							GAS1		0	0	0	0	0	0	0
							GATA3		0	0	0	1	0	0	0
							GATA4		0	0	0	0	0	0	0
							GATA6		1	0	0	0	0	0	0
							GBA		1	0	0	0	0	0	0
							GBP2		0	0	0	1	0	1	0
							GBP4		0	0	0	1	0	1	1
							GBX2		0	0	0	0	0	0	0
							GC		0	0	0	0	0	0	0
							GCGR		0	0	0	0	0	0	0
							GCH1		0	0	0	0	1	0	1
							GCLM		0	0	0	0	0	0	0
							GCNT2		0	0	0	0	0	0	0
							GCNT3		0	0	0	0	0	0	0
							GDF15		0	0	0	0	0	0	0
							GDF5		0	0	0	0	0	0	0
							GDF9		1	0	0	0	0	0	0
							GDNF		0	0	0	0	0	0	0
							GEM		0	0	0	0	0	0	0
							GGA2		0	0	0	0	0	0	0
							GGCX	intra+mi	0	0	0	0	0	0	0
							GIMAP4		0	0	0	0	0	0	0
							GIPC1	intra+mi	0	0	0	0	0	0	0
							GJA1		0	0	0	0	0	0	0
							GJB1		0	0	0	0	0	0	0
							GJB6		0	0	0	0	0	0	0
							GLG1		0	0	0	0	0	0	0
							GLI1		0	0	0	0	0	0	0
							GLI2		0	0	0	0	0	0	0
							GLO1	inter+mi	0	0	0	0	0	0	0
							GLRX		0	0	0	0	0	0	0
							GLRX2		0	0	0	0	0	0	0
							GLRX5		1	0	0	0	0	0	0
							GLS		0	0	0	0	0	0	0
							GMFB		0	0	0	0	0	0	0
							GMPS		0	1	0	0	0	0	0
							GNA12		0	0	0	0	0	0	0
							GNA13		0	0	0	0	0	0	0
							GNA15		1	0	0	0	1	0	0
							GNAI2		0	0	0	0	0	0	0
							GNAI3		0	0	0	0	1	0	0
							GNAQ		1	0	0	0	0	0	0
							GNB1		1	0	0	0	0	0	0
							GNB2		0	0	0	0	0	0	0
							GNB2L1		0	0	0	0	0	0	0
							GNE		0	0	0	0	0	0	0
							GNG12		0	0	0	0	0	0	0
							GNL1		0	0	0	0	0	0	0
							GNPAT		0	0	0	0	0	0	0
							GNS		0	0	0	0	0	0	0
							GOLGA8A		0	0	0	0	0	0	0
							GOLT1B		0	0	0	0	0	0	0
							GOPC		0	0	0	0	0	0	0
							GORASP2		0	0	0	0	0	0	0
							GP5		0	0	0	0	0	0	0
							GP9		0	0	0	0	0	0	0
							GPAM		0	0	0	0	0	0	0
							GPC4		0	0	0	0	0	0	0
							GPR17		0	0	0	0	0	0	0
							GPR56		0	0	0	0	0	0	0
							GPR77		0	0	0	0	0	0	0
							GPR97		0	0	0	0	0	0	0
							GPX2		0	0	0	0	0	0	0
							GRAMD4		1	0	0	0	0	0	0
							GRB2		1	0	0	1	0	0	0
							GRIN2A		0	0	0	0	0	0	0
							GRINA		1	0	0	0	0	0	0
							GRK1		0	0	0	0	0	0	0
							GSDMA		0	0	0	0	0	0	0
							GSDMB		0	0	0	0	0	0	0
							GSN	inter+mi	1	1	0	0	0	0	0
							GSTP1		0	0	0	0	0	0	0
							GTDC1		0	0	0	0	0	0	0
							GTF2A1		0	0	0	0	0	0	0
							GTF3C1		0	0	0	0	0	0	0
							GTPBP1	inter+mi	0	0	0	0	0	0	0
							GULP1		0	0	0	0	0	0	0
							GZMK		0	0	0	0	0	0	0
							GZMM		1	0	0	0	0	0	0
							H1F0		0	0	0	0	0	0	0
							H1FX		0	0	0	0	0	0	0
							H3F3B		0	0	0	0	0	0	0
							HADH		0	0	0	0	0	0	0
							HAND2		0	0	0	0	0	0	0
							HAPLN1		0	0	0	0	0	0	0
							HAPLN2		0	0	0	0	0	0	0
							HARS		0	0	0	0	0	0	0
							HAS3		0	0	0	0	0	0	0
							HAT1		0	0	0	0	0	0	0
							HAVCR1		1	0	0	0	0	0	0
							HAVCR2		1	0	0	1	0	0	0
							HBE1		0	0	0	0	0	0	0
							HBEGF		1	0	0	0	1	0	0
							HBP1		0	0	0	0	0	0	0
							HCCS		0	0	0	0	0	0	0
							HCFC2		0	0	0	0	0	0	0
							HCRT		1	0	0	0	0	0	0
							HCST	intra+mi	0	0	0	0	0	0	0
							HDAC1		0	0	0	0	0	0	0
							HDAC2		0	0	0	0	0	0	0
							HDAC4		1	1	0	0	0	0	0
							HDAC6		0	0	0	0	0	0	0
							HEATR5B		0	0	0	0	0	0	0
							HECTD1		0	0	0	0	0	0	0
							HERC5		0	0	0	1	0	0	0
							HERPUD1		0	0	0	0	0	0	0
							HFE		1	0	0	0	0	0	0
							HIF1A		0	0	0	1	1	0	1
							HIF1AN		0	0	0	0	0	0	0
							HIGD1A		0	0	0	0	0	0	0
							HINT1		0	0	0	0	0	0	0
							HINT2		0	0	0	0	0	0	0
							HIP1R		1	0	0	0	0	0	0
							HIPK3		0	0	0	0	0	0	0
							HIST1H2BD		0	0	0	0	0	0	0
							HIST1H3D		0	0	0	0	0	0	0
							HIST2H2BE	inter+mi	1	0	0	0	0	0	0
							HIVEP3		1	1	0	0	0	0	0
							HLA-A		1	1	0	1	0	0	1
							HLA-C		0	0	0	1	0	1	0
							HLA-DMA		0	0	0	0	0	0	1
							HLA-DRB1		0	0	0	1	0	0	1
							HLA-DRB5		0	0	0	1	0	0	0
							HLA-G		0	0	0	1	0	0	1
							HM13		0	0	0	0	0	0	0
							HMCN1		0	0	0	0	0	0	0
							HMGA1		0	0	0	0	0	0	0
							HMGB1		1	0	0	1	0	0	0
							HMGB2		0	0	0	0	0	0	0
							HMGB3		0	0	0	0	0	0	0
							HMOX1		0	0	0	1	0	0	0
							HNF4A		0	0	0	0	0	0	0
							HOXA13		0	0	0	0	0	0	0
							HOXA3		0	0	0	0	0	0	0
							HOXA9		0	0	0	0	0	0	0
							HPGD		0	0	0	0	0	0	0
							HPRT1		0	0	0	0	0	0	0
							HPS4		0	0	0	0	0	0	0
							HPS5		0	0	0	0	0	0	0
							HRAS		0	0	0	1	0	0	0
							HRH1		0	0	0	0	1	0	0
							HRH2	inter+mi	0	0	0	0	0	0	0
							HRH4		0	0	0	0	0	0	0
							HS2ST1		0	0	0	0	0	0	0
							HSD11B2		0	0	0	0	0	0	0
							HSF2		0	0	0	0	0	0	0
							HSH2D		1	0	0	0	0	0	0
							HSP90AA1		0	0	0	1	0	0	0
							HSP90AB1		0	0	0	0	0	0	0
							HSP90B1		0	0	0	1	0	0	0
							HSPA1A		1	0	0	0	0	0	0
							HSPA1B		1	0	0	0	0	0	0
							HSPA1L		1	0	0	0	0	0	0
							HSPA5		0	0	0	0	0	0	0
							HSPA6		0	0	0	0	0	0	0
							HSPD1		0	0	0	0	0	0	0
							HSPG2		0	0	0	0	0	0	0
							HTN3		0	0	0	0	0	0	0
							HTT		0	0	0	0	0	0	0
							IAPP		0	0	0	0	0	0	0
							IBTK		0	0	0	0	0	0	0
							ICAM1		0	0	0	1	1	0	1
							ICK		0	0	0	0	0	0	0
							ICOSLG		0	0	0	0	1	0	0
							ID2		0	0	0	0	0	0	0
							IDE		0	0	0	0	0	0	0
							IDH3A		0	0	0	0	0	0	0
							IDH3B		0	0	0	0	0	0	0
							IER5		0	0	0	0	0	0	0
							IFI16		0	0	0	0	0	0	0
							IFI44		0	1	0	0	0	1	1
							IFIT1		0	0	0	1	0	0	1
							IFIT2		0	0	0	1	0	1	1
							IFIT3		0	0	0	1	0	1	1
							IFITM1		0	0	0	1	1	1	0
							IFNA21		0	0	0	1	0	0	0
							IFNAR2		0	0	0	1	0	0	1
							IFNG		0	0	0	1	0	0	0
							IFNGR2		0	0	0	1	1	0	0
							IFT122		0	0	0	0	0	0	0
							IFT140	inter+mi	0	0	0	0	0	0	0
							IFT20		0	0	0	0	0	0	0
							IFT52		0	0	0	0	0	0	0
							IFT74		0	0	0	0	0	0	0
							IFT81		0	0	0	0	0	0	0
							IGDCC4		0	0	0	0	0	0	0
							IGF1		0	0	0	0	0	0	0
							IGF1R		0	0	0	0	0	0	0
							IGF2	inter+mi	0	0	0	0	0	0	0
							IGF2-AS		0	0	0	0	0	0	0
							IGF2BP1		0	0	0	0	0	0	0
							IGF2BP2		0	0	0	0	0	0	0
							IGF2R		1	0	0	0	0	0	0
							IGFBP2		0	0	0	0	0	0	0
							IGFBP7		0	0	0	0	0	0	0
							IGHV1-69		1	0	0	0	0	0	0
							IGKV7-3		0	0	0	0	0	0	0
							IGLC1		0	0	0	0	0	0	0
							IGLC2		0	0	0	0	0	0	0
							IGLC3		0	0	0	0	0	0	0
							IGLC7		0	0	0	0	0	0	0
							IGLV1-36		0	0	0	0	0	0	0
							IGLV1-44		0	0	0	0	0	0	0
							IGLV1-47		0	0	0	0	0	0	0
							IGLV3-10		0	0	0	0	0	0	0
							IGLV5-37		0	0	0	0	0	0	0
							IGSF10		0	0	0	0	0	0	0
							IGSF3		0	0	0	0	0	0	0
							IGSF6		0	0	0	0	0	0	0
							IGSF8		0	0	0	0	0	0	0
							IK		0	0	0	0	0	0	0
							IKBKB		0	0	0	1	0	0	0
							IKZF3		1	0	0	0	0	0	0
							IKZF4		0	0	0	0	0	0	0
							IKZF5		0	0	0	0	0	0	0
							IL11		0	0	0	1	0	0	0
							IL12A		0	0	0	1	0	0	0
							IL12RB2		0	0	0	1	0	0	0
							IL17A		0	0	0	1	0	0	0
							IL17RD		0	0	0	0	0	0	0
							IL17REL		1	0	0	0	0	0	0
							IL18		0	0	0	1	1	0	0
							IL18BP		0	0	0	1	0	0	1
							IL1A		0	0	0	1	1	0	0
							IL1B		0	0	0	1	1	0	0
							IL21R		0	0	0	1	0	0	0
							IL22		0	0	0	1	0	0	0
							IL23A		0	0	0	1	0	0	0
							IL23R		0	0	0	1	0	0	0
							IL25		0	0	0	1	0	0	0
							IL27		0	1	0	1	0	0	0
							IL27RA		0	0	0	1	0	0	0
							IL2RA		0	0	0	1	0	0	0
							IL31RA		0	0	0	1	0	0	0
							IL33		0	0	0	1	0	0	0
							IL36RN		0	1	0	1	0	0	0
							IL37		0	0	0	1	0	0	0
							IL4		0	0	0	1	0	0	0
							IL5		0	0	0	1	0	0	0
							IL6		0	0	0	1	1	0	1
							IL6R		0	0	0	1	0	0	0
							IL6ST		0	0	0	1	0	0	0
							IL7		0	0	0	1	0	1	1
							IL7R		0	0	0	1	1	0	0
							ILDR1		0	0	1	0	0	0	0
							INCENP		0	0	0	0	0	0	0
							ING1		0	0	0	0	0	0	0
							ING4		1	0	0	0	0	0	0
							INHBB		0	0	0	0	0	0	0
							INPPL1		0	0	0	1	0	0	0
							INS		0	0	0	0	0	0	0
							INSIG1		0	0	0	0	0	0	0
							INS-IGF2		0	0	0	0	0	0	0
							IP6K1		0	0	0	0	0	0	0
							IP6K2		0	0	0	1	0	0	0
							IPO9		0	0	0	0	0	0	0
							IQGAP2		0	0	0	0	0	0	0
							IRAK1		0	0	0	1	0	0	0
							IRAK2		0	0	0	1	1	0	0
							IRAK3		0	0	0	1	0	0	0
							IRF2		0	0	0	1	0	1	1
							IRF2BP2		0	0	0	0	0	0	0
							IRF5		0	0	0	1	0	0	1
							IRF6	DB+intra+mi	0	0	0	1	0	0	0
							IRF9		0	0	0	1	0	1	1
							IRS1		0	0	0	1	0	0	0
							ISG15		0	0	0	1	0	1	1
							ISG20	DB+intra+mi	0	0	0	1	0	1	1
							ITGA1		0	0	0	0	0	0	0
							ITGA10		0	1	0	0	0	0	0
							ITGA2		1	0	0	0	0	0	0
							ITGA3		0	0	0	0	0	0	0
							ITGA5		0	0	0	0	1	0	0
							ITGA6		0	0	0	0	0	0	0
							ITGB2		0	0	0	1	0	0	0
							ITGB3		0	0	0	0	1	0	0
							ITGB4		0	0	0	0	0	0	0
							ITGB5		0	0	0	0	0	0	0
							ITGB6		0	0	0	0	0	0	0
							ITGB8		0	0	0	0	1	0	0
							ITIH1		0	0	0	0	0	0	0
							ITK		1	0	0	0	0	0	0
							ITPA	inter+mi	1	0	0	0	0	0	0
							ITPKB		0	0	0	0	0	0	0
							ITPR1	intra+mi	0	0	0	0	0	0	0
							ITPR2		1	0	0	0	0	0	0
							ITSN2		0	0	0	0	0	0	0
							IVNS1ABP		0	0	0	0	0	0	0
							JAG1		0	0	0	0	0	0	0
							JAG2		1	0	0	0	0	0	0
							JAK2		0	1	0	1	0	0	1
							JAK3		0	0	0	1	0	0	0
							JAKMIP1		0	0	0	0	0	0	0
							JAKMIP2		0	0	0	0	0	0	0
							JAKMIP3		0	0	0	0	0	0	0
							JARID2		0	0	0	0	0	0	0
							JMY		0	0	0	0	0	0	0
							JRK		0	0	0	0	0	0	0
							JUN		0	0	0	1	0	0	0
							JUND		0	0	0	0	0	0	0
							JUP		0	0	0	0	0	0	0
							KALRN		0	0	0	0	0	0	0
							KANK1		1	1	0	0	0	0	0
							KAT2A	intra+mi	0	0	0	0	0	0	0
							KAT6A		0	0	0	0	0	0	0
							KAT6B		0	0	1	0	0	0	0
							KCNE1		0	0	0	0	0	0	0
							KCNH8		0	0	0	0	0	0	0
							KCNK5	inter+mi	0	0	0	0	0	0	0
							KCNQ1		1	1	0	0	0	0	0
							KCTD5		0	0	0	0	0	0	0
							KDR		0	0	0	0	0	0	0
							KHSRP		0	0	0	0	0	0	0
							KIAA0040		0	0	0	0	0	0	0
							KIAA0100	intra+mi	0	0	0	0	0	0	0
							KIAA0319L		0	0	0	0	0	0	0
							KIF13B		0	0	0	0	0	0	0
							KIFAP3		0	0	0	0	0	0	0
							KIFC3		0	0	0	0	0	0	0
							KIRREL2		0	0	0	0	0	0	0
							KIT		0	1	0	0	0	0	0
							KL		0	0	0	0	0	0	0
							KLF10		0	0	0	0	0	0	0
							KLF11		0	0	0	0	0	0	0
							KLF13		0	0	0	0	0	0	0
							KLF3		1	0	0	0	0	0	0
							KLF5		0	0	0	0	0	0	0
							KLF6		0	0	0	0	1	0	0
							KLF7		0	0	0	0	0	0	0
							KLF9		1	1	0	0	0	0	0
							KLHDC3		0	0	0	0	0	0	0
							KLHL2		0	0	0	0	0	0	0
							KLHL20		0	0	0	0	0	0	0
							KLHL21		0	0	0	0	0	0	0
							KLK11		0	0	0	0	0	0	0
							KLK3		0	0	0	0	0	0	0
							KLLN		0	0	0	0	0	0	0
							KLRB1		0	0	0	0	0	0	0
							KLRC1		0	0	0	0	0	0	0
							KLRC2		0	0	0	0	0	0	0
							KLRC3		0	0	0	0	0	0	0
							KLRC4		0	0	0	0	0	0	0
							KLRF1		0	0	0	0	0	0	0
							KLRK1		0	0	0	0	0	0	1
							KPNA1		0	1	0	1	0	0	0
							KPNA2		0	0	0	1	0	0	0
							KPNA4		0	0	0	1	0	0	0
							KPNA6		1	0	0	0	0	0	0
							KPNB1		0	0	0	1	0	0	0
							KRAS		0	1	0	1	0	0	0
							KRIT1		0	0	0	0	0	0	0
							L1CAM		0	0	0	0	0	0	0
							LAG3		0	0	0	0	0	0	0
							LAIR2		0	0	0	0	0	0	0
							LAMA5		0	0	0	1	0	0	0
							LAMB1		0	0	0	0	0	0	0
							LAMP2		0	0	0	0	0	0	0
							LARP1		1	0	0	0	0	0	0
							LARS		1	1	0	0	0	0	0
							LAX1		0	0	0	0	0	0	0
							LBP		0	0	0	1	0	0	0
							LBR		0	0	0	0	0	0	0
							LCK		1	0	0	1	1	0	0
							LCORL		0	0	0	0	0	0	0
							LCP1		0	0	0	1	0	0	0
							LCP2		0	0	0	0	1	0	1
							LDHA		0	0	0	0	0	0	0
							LDHB		0	0	0	0	0	0	0
							LDLR		0	0	0	0	1	0	0
							LDLRAP1		0	0	0	0	0	0	0
							LEMD3		0	0	0	0	0	0	0
							LEPR		0	0	0	0	0	0	0
							LEPROTL1		0	0	0	0	0	0	0
							LFNG		0	0	0	0	0	0	0
							LGALS1		1	0	0	0	0	0	0
							LGALS3BP		0	0	0	0	0	1	1
							LGALS9		0	0	0	1	0	0	0
							LHX4		0	1	0	0	0	0	0
							LIAS		0	0	0	0	0	0	0
							LIF	inter+mi	0	0	0	1	1	0	0
							LIFR		0	0	0	1	0	0	0
							LILRA1		0	0	0	0	0	0	0
							LILRA5		0	0	0	0	0	0	0
							LILRB1		0	0	0	0	0	0	0
							LILRB2		0	0	0	0	0	0	0
							LILRB4		0	0	0	0	0	0	0
							LILRB5		0	0	0	0	0	0	0
							LIMS1		0	0	0	0	0	0	0
							LIN7A		0	0	0	0	0	0	0
							LIN7C		0	0	0	0	0	0	0
							LINC00598		0	0	0	0	0	0	0
							LIPA		0	0	0	0	0	0	0
							LIPG		0	0	0	0	0	0	0
							LLGL1		0	0	0	0	0	0	0
							LLGL2		1	0	0	0	0	0	0
							LMBR1L	intra+mi	0	0	0	0	0	0	0
							LMLN		0	0	0	0	0	0	0
							LMNB1		0	0	0	1	0	0	0
							LONP2		0	1	0	0	0	0	0
							LOXL2		0	0	0	0	0	0	0
							LPIN1		0	0	0	0	0	0	0
							LRFN3		0	0	0	0	0	0	0
							LRG1		1	0	0	0	0	0	0
							LRIG2		0	0	0	0	0	0	0
							LRIG3		0	0	0	0	0	0	0
							LRP1		0	0	0	0	0	0	0
							LRP10	intra+mi	1	0	0	0	0	0	0
							LRP1B		0	0	0	0	0	0	0
							LRP5		1	0	0	0	0	0	0
							LRP6		0	0	0	0	0	0	0
							LRPPRC		0	0	0	0	0	0	0
							LRR1		0	0	0	0	0	0	0
							LRRC17		0	0	0	0	0	0	0
							LRRC47		1	0	0	0	0	0	0
							LRRC8A		0	0	0	0	0	0	0
							LRRC8D		0	0	0	0	0	0	0
							LRRFIP1		0	0	0	0	0	0	0
							LRRK2		0	0	0	0	0	0	0
							LRRN1		0	0	0	0	0	0	0
							LSAMP		0	0	0	0	0	0	0
							LSG1		0	0	0	0	0	0	0
							LSM1		0	0	0	0	0	0	0
							LSM14A		0	0	0	0	0	0	0
							LSP1		0	0	0	0	0	0	0
							LTB4R		1	0	0	0	0	0	0
							LTB4R2		1	0	0	0	0	0	0
							LTBP1		0	1	0	0	0	0	0
							LTBP2		0	0	0	0	0	0	0
							LTBP3		1	0	0	0	0	0	0
							LTBP4		1	0	0	0	0	0	0
							LTBR		0	0	0	1	0	0	0
							LTC4S	inter+mi	0	0	0	0	0	0	0
							LTK		0	0	0	0	0	0	0
							LTN1		0	0	0	0	0	0	0
							LUC7L2		0	0	0	0	0	0	0
							LUC7L3		1	0	0	0	0	0	0
							LY6D		0	0	0	0	0	0	0
							LY6G5B		0	0	0	0	0	0	0
							LY6G6E		1	0	0	0	0	0	0
							LY6H		0	0	0	0	0	0	0
							LY6K		0	0	0	0	0	0	0
							LYL1		0	0	0	0	0	0	0
							LYST		0	0	0	0	0	0	0
							M6PR		0	0	0	0	0	0	0
							MACF1		0	0	0	0	0	0	0
							MAD2L1		0	0	0	0	0	0	0
							MAFB		0	0	0	0	0	0	0
							MAFG		1	0	0	0	0	0	0
							MAGED2		0	0	0	0	0	0	0
							MAGI1		0	0	0	0	0	0	0
							MAL2		0	0	0	0	0	0	0
							MALL		0	0	0	0	0	0	0
							MALT1		0	0	0	0	0	0	0
							MANBA		0	0	0	0	0	0	0
							MAOB		0	0	0	0	0	0	0
							MAP2K3		1	0	0	1	0	0	0
							MAP2K5		0	0	0	0	0	0	0
							MAP2K7		0	0	0	1	0	0	0
							MAP3K1		0	0	0	0	0	0	0
							MAP3K2		0	0	0	0	0	0	0
							MAP3K4		0	0	0	0	0	0	0
							MAP3K7		0	0	0	1	0	0	0
							MAP3K8		0	0	0	1	0	0	0
							MAP3K9		0	0	0	0	0	0	0
							MAP4		0	0	0	0	0	0	0
							MAP4K2		0	0	0	0	0	0	0
							MAPK1		1	0	0	1	0	0	0
							MAPK11		1	0	0	1	0	0	0
							MAPK12		1	0	0	0	0	0	0
							MAPK14		0	0	0	1	0	0	0
							MAPK7		1	0	0	1	0	0	0
							MAPKAPK5		0	0	0	0	0	0	0
							MARCH1		0	0	0	0	0	0	0
							MARCH8		0	0	0	0	0	0	0
							MARK4		1	0	0	0	0	0	0
							MAST1		0	0	0	0	0	0	0
							MAT2A	intra+mi	0	0	0	0	0	0	0
							MATR3		0	0	0	0	0	0	0
							MAX		0	0	0	0	0	0	0
							MAZ		0	0	0	0	0	0	0
							MBD4		0	0	0	0	0	0	0
							MBL2		0	0	0	0	0	0	0
							MBNL1		0	0	0	0	0	0	0
							MBOAT1		0	0	0	0	0	0	0
							MCAM		1	0	0	0	0	0	0
							MCFD2		0	0	0	0	0	0	0
							MCL1		0	0	0	1	0	0	0
							MCM5		0	0	0	0	0	0	0
							MCM7		0	0	0	0	0	0	0
							MDC1	inter+mi	0	0	0	0	0	0	0
							MDFI		0	0	0	0	0	0	0
							MDM2		0	0	0	0	0	0	0
							MDM4		1	0	0	0	0	0	0
							MECOM		0	1	0	0	0	0	0
							MED28		1	0	0	0	0	0	0
							MEF2A		0	0	0	1	0	0	0
							MEF2C		0	0	0	1	0	0	0
							MEF2D		1	0	0	0	0	0	0
							MEGF9		0	1	0	0	0	0	0
							MEN1		0	0	0	0	0	0	0
							MERTK		1	1	0	0	0	0	0
							MET		0	0	0	0	1	0	0
							METAP2		1	1	0	0	0	0	0
							METTL14		0	0	0	0	0	0	0
							METTL7A		0	0	0	0	0	0	0
							MFGE8		0	0	0	0	0	0	0
							MFN2		0	0	0	0	0	0	0
							MFNG		0	0	0	0	0	0	0
							MFSD10		0	0	0	0	0	0	0
							MGAT2		0	0	0	0	0	0	0
							MGAT4A		0	0	0	0	0	0	0
							MIB1		0	0	0	0	0	0	0
							MICB		0	0	0	0	0	0	0
							MICU1		0	0	0	0	0	0	0
							MIER3		0	0	0	0	0	0	0
							MKI67		0	0	0	0	0	0	0
							MKNK2		0	0	0	0	0	0	0
							MLC1		1	1	0	0	0	0	0
							MLF2		1	0	0	0	0	0	0
							MLL2		0	0	0	0	0	0	0
							MLLT1	inter+mi	0	0	0	0	0	0	0
							MLLT10		0	1	0	0	0	0	0
							MMD		0	0	1	0	0	0	0
							MME		0	0	0	0	0	0	0
							MMP2		0	1	0	1	0	0	0
							MMP7		0	0	0	0	0	0	0
							MMP9	inter+mi	0	0	0	1	0	0	0
							MMRN1		0	0	0	0	0	0	0
							MOAP1		0	0	0	0	0	0	0
							MORF4L2		0	0	0	0	0	0	0
							MOV10		0	0	0	0	0	1	0
							MOV10L1		1	0	0	0	0	0	0
							MPL		0	0	0	0	0	0	0
							MPPE1		0	0	0	0	0	0	0
							MRAP2		0	0	0	0	0	0	0
							MRC2		0	0	0	0	0	0	0
							MRPL19		0	1	0	0	0	0	0
							MRPL27		0	0	0	0	0	0	0
							MRPL49		0	0	0	0	0	0	0
							MRPL9		0	0	0	0	0	0	0
							MRPS10		0	0	0	0	0	0	0
							MRPS18B		0	0	0	0	0	0	0
							MRPS18C		0	0	0	0	0	0	0
							MRPS23		0	0	0	0	0	0	0
							MRPS24		0	0	0	0	0	0	0
							MRPS27		0	1	0	0	0	0	0
							MRPS6		0	0	0	0	0	0	0
							MS4A2		0	0	0	0	0	0	0
							MS4A6E		0	0	0	0	0	0	0
							MSH2		0	0	0	0	0	0	0
							MSH6		0	0	0	0	0	0	0
							MSLN	inter+mi	1	1	0	0	0	0	0
							MSLNL		1	0	0	0	0	0	0
							MSN		0	0	0	1	0	0	0
							MSRB2		0	0	0	0	0	0	0
							MT2A		0	0	0	1	0	0	1
							MT3		0	0	0	0	0	0	0
							MTA1	inter+mi	1	0	0	0	0	0	0
							MTDH		0	0	0	0	0	0	0
							MTF1		0	0	0	0	0	0	0
							MTHFR		0	0	0	0	0	0	0
							MTHFS		0	0	0	0	0	0	0
							MTMR11		1	0	0	0	0	0	0
							MTMR12		0	0	0	0	0	0	0
							MTMR3	inter+mi	1	1	0	0	0	0	0
							MTPN		0	0	0	0	0	0	0
							MUC1		1	0	0	1	0	0	0
							MUC15		0	0	0	0	0	0	0
							MUC17		0	0	0	0	0	0	0
							MUC3A		0	0	0	0	0	0	0
							MUC4		0	0	0	0	0	0	0
							MUC5AC		0	0	0	0	0	0	0
							MUC5B		0	0	0	0	0	0	0
							MUC6		0	0	0	0	0	0	0
							MUM1		0	0	0	0	0	0	0
							MX2		0	0	0	1	0	0	1
							MXD1		0	0	0	0	1	0	0
							MXI1		0	0	0	0	0	0	0
							MYADM		0	0	0	0	0	0	0
							MYADML2		1	0	0	0	0	0	0
							MYB		0	0	0	0	0	0	0
							MYBPC1		1	0	0	0	0	0	0
							MYBPH		0	1	0	0	0	0	0
							MYC		1	0	0	1	1	0	0
							MYCBP2		0	0	0	0	0	0	0
							MYD88		0	0	0	1	0	0	1
							MYH2		0	0	1	0	0	0	0
							MYH9		0	0	0	0	0	0	0
							MYLPF		0	0	0	0	0	0	0
							MYO10		0	0	0	0	0	0	0
							MYO18A		0	0	0	0	0	0	0
							MYO5A		1	0	0	0	0	0	0
							MYO6		0	0	0	0	0	0	0
							MYOD1		0	0	0	0	0	0	0
							N4BP1		0	0	1	0	0	0	0
							NAB1		0	0	0	0	0	0	0
							NACC1		0	0	0	0	0	0	0
							NAE1	intra+mi	0	0	0	0	0	0	0
							NAIP		0	0	0	0	0	0	0
							NAPSB		0	0	0	0	0	0	0
							NARF		1	0	0	0	0	0	0
							NARS		0	0	0	0	0	0	0
							NAV1		0	0	0	0	0	0	0
							NCAM2		0	0	0	0	0	0	0
							NCAN		1	0	0	0	0	0	0
							NCBP2		0	0	0	0	0	0	0
							NCF4		0	0	0	0	0	0	0
							NCKAP1		0	0	0	0	0	0	0
							NCKAP1L		0	0	0	0	0	0	0
							NCKIPSD		0	0	0	0	0	0	0
							NCOA1		0	0	0	0	0	0	0
							NCOR2		0	0	0	0	0	0	0
							NCS1		1	0	0	0	0	0	0
							NCSTN		0	0	0	0	0	0	0
							NDEL1		0	0	0	0	0	0	0
							NDRG1		1	0	0	0	0	0	0
							NDST1	inter+mi	1	0	0	0	0	0	0
							NDUFA7		0	0	0	0	0	0	0
							NDUFS1		0	0	0	0	0	0	0
							NDUFS4		0	0	0	0	0	0	0
							NDUFS5		0	0	0	0	0	0	0
							NDUFS8		1	0	0	0	0	0	0
							NECAP1		0	0	0	0	0	0	0
							NEDD4L		0	1	0	0	0	0	0
							NEGR1		0	0	0	0	0	0	0
							NEK6		0	0	0	0	0	0	0
							NET1		0	0	0	0	0	0	0
							NEU1		0	0	0	0	0	0	0
							NEUROD1		0	0	0	0	0	0	0
							NEUROD2		1	0	0	0	0	0	0
							NFAM1		0	0	0	0	0	0	0
							NFAT5		0	0	0	0	0	0	0
							NFATC3		0	0	0	0	0	0	0
							NFATC4		1	0	0	0	0	0	0
							NFE2L1		0	0	0	0	0	0	0
							NFIB		0	0	0	0	0	0	0
							NFIL3		0	0	0	0	0	0	0
							NFKB1		0	0	0	1	1	0	1
							NFKBIA		0	0	0	1	1	0	1
							NFKBID		0	0	0	0	0	0	0
							NFKBIZ		0	0	0	0	0	0	0
							NFX1		1	1	0	0	0	0	0
							NFYA		1	1	0	0	0	0	0
							NGFR		0	0	0	0	0	0	0
							NGRN		0	0	0	0	0	0	0
							NIN		0	0	0	0	0	0	0
							NINJ1		0	0	0	0	0	0	0
							NIPBL	inter+mi	0	0	0	0	0	0	0
							NKAP		0	0	0	0	0	0	0
							NKG7	intra+mi	0	0	0	0	0	0	0
							NKRF		0	0	0	0	0	0	0
							NKTR		0	0	0	0	0	0	0
							NKX3-2		0	0	0	0	0	0	0
							NLGN4X		0	0	0	0	0	0	0
							NLGN4Y		0	0	0	0	0	0	0
							NLRC4		0	0	1	0	0	0	0
							NLRP1		1	0	0	0	0	0	0
							NLRP10		0	0	0	0	0	0	0
							NLRP13		0	0	0	0	0	0	0
							NLRP14		0	0	0	0	0	0	0
							NLRP2		0	0	0	0	0	0	0
							NLRP7		0	0	0	0	0	0	0
							NNT		0	0	0	0	0	0	0
							NOC3L		0	0	0	0	0	0	0
							NODAL		0	0	0	0	0	0	0
							NONO		0	0	0	0	0	0	0
							NOS3	inter+mi	1	0	0	0	0	0	0
							NOTCH1		1	0	0	0	0	0	0
							NOTCH2		0	0	0	0	0	0	0
							NPC1		0	0	0	0	0	0	0
							NPHS1		0	0	0	0	0	0	0
							NPTN		0	0	0	0	0	0	0
							NPY1R		0	0	0	0	0	0	0
							NR3C1		0	0	0	0	0	0	0
							NR4A1		0	0	0	0	0	0	0
							NR4A2		0	0	0	0	0	0	0
							NRGN	mi+top gen	0	0	0	0	0	0	0
							NRIP1		0	0	0	0	0	0	0
							NRP1		0	1	0	0	0	0	0
							NRP2		0	0	0	0	0	0	0
							NRXN3		0	1	0	0	0	0	0
							NSF		0	0	0	0	0	0	0
							NT5E		0	0	0	0	0	0	0
							NTF3		0	0	0	0	0	0	0
							NTRK2		0	0	0	0	0	0	0
							NTSR1		1	1	0	0	0	0	0
							NUAK1		0	0	0	0	0	0	0
							NUCB1	intra+mi	0	0	0	0	0	0	0
							NUCKS1		0	0	0	0	0	0	0
							NUDC		0	0	0	0	0	0	0
							NUDCD2		0	0	0	0	0	0	0
							NUDT21		0	0	0	0	0	0	0
							NUDT7		0	0	0	0	0	0	0
							NUMB		0	0	0	0	0	0	0
							NUP160		0	0	0	1	0	0	0
							NUP210		0	0	0	1	0	0	0
							NUP214		0	1	0	1	0	0	0
							NUP43		0	0	0	1	0	0	0
							NUP54		0	0	0	1	0	0	0
							NUP93		0	0	0	1	0	0	1
							NUP98		0	0	0	1	0	0	0
							NUPR1		0	0	0	0	0	0	0
							NUS1		0	0	0	0	0	0	0
							NXN		0	0	0	0	0	0	0
							OAS1		1	0	0	1	0	1	0
							OAS2		1	0	0	1	0	0	1
							OASL		0	0	0	1	0	1	1
							OBSCN		0	0	0	0	0	0	0
							OFD1		0	0	0	0	0	0	0
							OGT		0	0	0	0	0	0	0
							OLFM4		0	0	0	0	0	0	0
							OLR1		0	0	0	0	1	0	0
							OPA3		0	0	0	0	0	0	0
							OPRM1		0	0	0	1	0	0	0
							OPTN		0	0	0	0	0	0	0
							ORM1		1	1	0	0	0	0	0
							ORM2		1	1	0	0	0	0	0
							OSBP		0	0	0	0	0	0	0
							OSBPL1A		0	0	0	0	0	0	0
							OSCAR		0	0	0	0	0	0	0
							OSM		0	0	0	1	1	0	0
							OSMR		0	0	0	1	1	0	0
							OSR1		0	0	0	0	0	0	0
							OTUB2		1	1	0	0	0	0	0
							OTUD1		0	0	0	0	0	0	0
							OTUD4		0	0	0	0	0	0	0
							OXA1L		0	0	0	0	0	0	0
							OXR1		0	0	0	0	0	0	0
							OXSR1		0	0	0	0	0	0	0
							OXTR		0	0	0	0	0	0	0
							P2RX1	intra+mi	0	0	0	0	0	0	0
							P2RX4		0	0	0	0	1	0	0
							P2RY2		0	0	0	0	1	0	0
							PA2G4		0	0	0	0	0	0	0
							PAAF1		0	0	0	0	0	0	0
							PABPC1	DB+intra+mi	1	1	0	0	0	0	0
							PACS2		0	0	0	0	0	0	0
							PACSIN3		0	0	0	0	0	0	0
							PADI4		0	0	0	0	0	0	0
							PAF1		0	0	0	0	0	0	0
							PAFAH1B2		0	0	0	0	0	0	0
							PAFAH1B3		0	0	0	0	0	0	0
							PAG1		0	0	0	0	0	0	0
							PAK2		0	0	0	1	0	0	0
							PAPOLA		1	0	0	0	0	0	0
							PARD3		0	0	0	0	0	0	0
							PARP1		0	0	0	0	0	0	0
							PARP9		0	1	0	0	0	1	0
							PARVA		0	0	0	0	0	0	0
							PARVB		1	0	0	0	0	0	0
							PATL1		0	0	0	0	0	0	0
							PAWR		0	0	0	0	0	0	0
							PAX3		0	0	1	0	0	0	0
							PAX5		0	0	0	0	0	0	0
							PBX1		0	1	0	0	0	0	0
							PBXIP1		0	0	0	0	0	0	0
							PCBD2		0	0	0	0	0	0	0
							PCBP1		0	0	0	0	0	0	0
							PCDH19		0	0	0	0	0	0	0
							PCDH7		0	0	0	0	1	0	0
							PCDH8		0	0	0	0	0	0	0
							PCDHB10		0	0	0	0	0	0	0
							PCDHB11		0	0	0	0	0	0	0
							PCDHB15		0	0	0	0	0	0	0
							PCDHB2		0	0	0	0	0	0	0
							PCDHGA1		0	0	0	0	0	0	0
							PCDHGA10		0	0	0	0	0	0	0
							PCDHGA2		0	0	0	0	0	0	0
							PCDHGA8		0	0	0	0	0	0	0
							PCDHGC3		0	0	0	0	0	0	0
							PCDHGC4		0	0	0	0	0	0	0
							PCDHGC5		0	0	0	0	0	0	0
							PCK2	inter+mi	0	0	0	0	0	0	0
							PCNA		0	0	0	0	0	0	0
							PCNP		0	0	0	0	0	0	0
							PCSK9		0	0	0	0	0	0	0
							PCYOX1		0	0	0	0	0	0	0
							PDCD10		0	0	0	0	0	0	0
							PDCD11		0	0	0	0	0	0	0
							PDCD4		0	0	0	1	0	0	0
							PDCD6		0	0	0	0	0	0	0
							PDE12		0	0	0	1	0	0	0
							PDE1A		0	0	0	0	0	0	0
							PDE3A		0	0	0	0	0	0	0
							PDE4A		0	0	0	0	0	0	0
							PDE4DIP		0	0	0	0	0	0	0
							PDE5A		0	1	0	0	0	0	0
							PDE7A		0	0	0	0	0	0	0
							PDGFD		0	1	0	0	0	0	0
							PDGFRA		1	1	0	0	0	0	0
							PDGFRB		0	0	0	0	0	0	0
							PDHA1		0	0	0	0	0	0	0
							PDIA3		0	0	0	0	0	0	0
							PDLIM5		0	0	0	0	0	0	0
							PDLIM7	inter+mi	1	0	0	0	0	0	0
							PDPK1		0	0	0	0	0	0	0
							PDXK		0	0	0	0	0	0	0
							PDZD2		0	1	0	0	0	0	0
							PEA15		0	0	0	0	0	0	0
							PEBP1		0	0	0	0	0	0	0
							PEG3	DB+mi	0	1	0	0	0	0	0
							PELI1		0	0	0	1	0	0	1
							PELI2		0	0	0	1	0	0	0
							PEX11B		0	0	0	0	0	0	0
							PFKFB2		0	0	0	0	0	0	0
							PFKFB3		0	0	0	0	0	0	0
							PFN1		0	0	0	0	0	0	0
							PGAM1		0	0	0	0	0	0	0
							PGD		0	0	0	0	0	0	0
							PGLYRP1		0	0	0	0	0	0	0
							PGM2		0	0	0	0	0	0	0
							PGM5		0	0	0	0	0	0	0
							PGRMC2		1	0	0	0	0	0	0
							PHC2		0	0	0	0	0	0	0
							PHF20		0	0	0	0	0	0	0
							PHF21A		0	0	0	0	0	0	0
							PHIP		0	0	0	0	0	0	0
							PHKA1		0	0	0	0	0	0	0
							PHLDA3		0	0	0	0	0	0	0
							PHLPP1		0	0	0	0	0	0	0
							PHTF1		0	0	0	0	0	0	0
							PIAS2		0	0	0	0	0	0	0
							PIAS3		0	0	0	0	0	0	0
							PICALM		0	1	0	0	0	0	0
							PIGR		0	0	0	0	0	0	0
							PIGS		0	0	0	0	0	0	0
							PIGT		0	0	0	0	0	0	0
							PIK3C2A		0	0	0	0	0	0	0
							PIK3CA		0	0	0	1	0	0	0
							PIK3R1		0	0	0	1	0	0	0
							PIK3R2		0	0	0	1	0	0	0
							PIM1		0	0	0	1	0	0	1
							PIM2		0	0	0	0	0	0	0
							PIM3	inter+mi	1	0	0	0	0	0	0
							PIN1		0	0	0	1	0	0	0
							PITPNA		0	0	0	1	0	0	0
							PITPNC1		0	0	0	0	0	0	0
							PIWIL4		0	0	0	0	0	0	0
							PKD1		0	0	0	0	0	0	0
							PKD1L1		0	0	0	0	0	0	0
							PKHD1		0	1	0	0	0	0	0
							PKLR		1	0	0	0	0	0	0
							PKN1		0	0	0	0	0	0	0
							PKNOX1		0	0	1	0	0	0	0
							PLA2G10		0	0	0	0	0	0	0
							PLA2G2A		0	1	0	0	0	0	0
							PLA2G4A		0	0	0	0	0	0	1
							PLA2G7		0	0	0	0	0	0	0
							PLAGL2		0	0	0	0	0	0	0
							PLAT		0	0	0	0	0	0	0
							PLAUR		0	0	0	0	1	0	0
							PLCB3		0	0	0	0	0	0	0
							PLCD1		0	0	0	0	0	0	0
							PLCE1		0	0	0	0	0	0	0
							PLCG1		0	0	0	1	0	0	0
							PLCG2		0	1	0	0	0	0	0
							PLD1		0	0	0	0	0	0	0
							PLD3		1	0	0	0	0	0	0
							PLEKHA1		0	0	0	0	0	0	0
							PLEKHA7		0	0	0	0	0	0	0
							PLEKHB2		0	0	0	0	0	0	0
							PLEKHF1		0	0	0	0	0	0	0
							PLEKHG2		0	0	0	0	0	0	0
							PLK1		0	0	0	0	0	0	0
							PLK3		0	0	0	0	0	0	0
							PLOD3		0	0	0	0	0	0	0
							PLP2		0	0	0	0	0	0	0
							PLSCR4		0	0	0	0	0	0	0
							PLTP	inter+mi	0	0	0	0	0	0	0
							PLXNA3		0	0	0	0	0	0	0
							PLXNA4		1	0	0	0	0	0	0
							PLXNB1		1	0	0	0	0	0	0
							PLXNB2	inter+mi	1	0	0	0	0	0	0
							PLXNC1		0	0	0	0	0	0	0
							PMAIP1		0	0	0	0	0	0	0
							PML		0	1	0	1	0	0	1
							PNN		0	0	0	0	0	0	0
							PNP		1	0	0	0	0	0	1
							PNRC1		0	0	0	0	0	0	0
							POC1A		0	0	0	0	0	0	0
							PODXL2		0	0	0	0	0	0	0
							POGK		0	0	0	0	0	0	0
							POLD3		0	0	0	0	0	0	0
							POLD4		1	0	0	0	0	0	0
							POLL		0	0	0	0	0	0	0
							POLR1B		0	0	0	0	0	0	0
							POLR2H		0	0	0	0	0	0	0
							POLR2I		0	0	0	0	0	0	0
							POLR2K		0	0	0	0	0	0	0
							POLR3B		0	0	0	0	0	0	0
							POLR3D		0	0	0	0	0	0	0
							POLR3G		0	0	0	0	0	0	0
							POLR3GL		0	0	0	0	0	0	0
							POLR3K		1	0	0	0	0	0	0
							POM121		0	0	0	1	0	0	0
							POMC		0	0	0	1	0	0	0
							POR	DB+intra+mi	0	0	0	0	0	0	0
							POU2F1		0	0	0	1	0	0	0
							POU2F2		1	0	0	0	0	0	0
							POU3F2		0	0	0	0	0	0	0
							PPA2		0	0	0	0	0	0	0
							PPARA		0	0	0	0	0	0	0
							PPARD		0	0	0	0	0	0	0
							PPARG		0	1	0	0	0	0	0
							PPARGC1A		0	0	0	0	0	0	0
							PPBP		0	0	0	0	0	0	0
							PPFIBP1		0	0	0	0	0	0	0
							PPIA		0	0	0	1	0	0	0
							PPIB		0	0	0	0	0	0	0
							PPIF		0	0	0	0	0	0	0
							PPIG		0	0	0	0	0	0	0
							PPM1F		0	0	0	0	0	0	0
							PPP1CB		0	0	0	0	0	0	0
							PPP1R10	inter+mi	0	0	0	0	0	0	0
							PPP1R12B		1	0	0	0	0	0	0
							PPP1R15A		0	0	0	0	0	0	0
							PPP1R17		0	0	0	0	0	0	0
							PPP1R1A		0	0	0	0	0	0	0
							PPP2CA		0	0	0	1	0	0	0
							PPP2R1A		0	0	0	1	0	0	0
							PPP2R1B		0	0	0	1	0	0	0
							PPP2R5A		0	0	0	0	0	0	0
							PPP2R5C		0	0	0	0	0	0	0
							PPP3R1		0	0	0	0	0	0	0
							PPP3R2		0	0	0	0	0	0	0
							PPP6C		0	0	0	0	0	0	0
							PPTC7		0	0	0	0	0	0	0
							PQBP1		0	0	0	0	0	0	0
							PRDM16		0	1	1	0	0	0	0
							PRDM4		0	0	0	0	0	0	0
							PRDX2		0	0	0	0	0	0	0
							PRDX6		0	0	0	0	0	0	0
							PRELID1	inter+mi	1	0	0	0	0	0	0
							PREPL		0	0	0	0	0	0	0
							PREX1		0	0	0	0	0	0	0
							PRG3		0	0	0	0	0	0	0
							PRIM2		0	0	0	0	0	0	0
							PRKAA1		0	0	0	0	0	0	0
							PRKAA2		0	0	0	0	0	0	0
							PRKAB2		0	0	0	0	0	0	0
							PRKACA		0	0	0	1	0	0	0
							PRKAG1	intra+mi	0	0	0	0	0	0	0
							PRKAR1A		0	0	0	0	0	0	0
							PRKAR2A		0	0	0	0	0	0	0
							PRKCA		0	0	0	0	0	0	0
							PRKCE		0	0	0	0	0	0	0
							PRKCG		0	0	0	0	0	0	0
							PRKCH		0	0	0	0	0	0	0
							PRNP		0	0	0	0	0	0	0
							PROCR		0	0	0	0	0	1	0
							PROM1		0	0	0	0	0	0	0
							PROS1		0	0	0	0	0	0	0
							PROX1		0	0	0	0	0	0	0
							PRR11		0	0	0	0	0	0	0
							PRR13		0	0	0	0	0	0	0
							PRRC2B		0	0	0	0	0	0	0
							PSIP1		0	0	0	0	0	0	0
							PSMA7		0	0	0	1	0	0	0
							PSMB4		0	0	0	1	0	0	0
							PSMB5		1	0	0	1	0	0	0
							PSMC4		0	0	0	1	0	0	0
							PSMD1		0	0	0	1	0	0	0
							PSMD9		0	0	0	1	0	0	0
							PSME1	inter+mi	0	0	0	1	0	1	1
							PSME2		0	0	0	1	0	1	1
							PSME3		0	0	0	1	0	0	0
							PSMG1		0	0	0	0	0	0	0
							PSTPIP2		0	0	0	0	0	0	0
							PTAFR		0	0	0	1	1	0	0
							PTAR1		0	0	0	0	0	0	0
							PTBP1	intra+mi	1	0	0	0	0	0	0
							PTEN		0	0	0	0	0	0	0
							PTGDR2		0	0	0	0	0	0	0
							PTGDS	inter+mi	0	0	0	0	0	0	0
							PTGER1		0	0	0	0	0	0	0
							PTGES		0	0	0	0	0	0	0
							PTGFR		0	0	0	0	0	0	0
							PTGFRN		0	0	0	0	0	0	0
							PTGIS		0	0	0	0	0	0	0
							PTGR2		0	0	0	0	0	0	0
							PTGS2		0	0	0	1	0	0	1
							PTH		0	0	0	0	0	0	0
							PTK2		0	0	0	0	0	0	0
							PTK2B		0	0	0	1	0	0	0
							PTMA		0	0	0	0	0	0	0
							PTPN1		0	0	0	1	0	0	1
							PTPN12		0	0	0	1	0	0	0
							PTPN22		0	0	0	0	0	0	0
							PTPN4		0	0	0	1	0	0	0
							PTPN7	inter+mi	0	0	0	1	0	0	0
							PTPN9		0	0	0	1	0	0	0
							PTPRE		0	0	0	0	1	0	0
							PTPRF		0	0	0	0	0	0	0
							PTPRH		0	0	0	0	0	0	0
							PTPRJ		0	0	0	1	0	0	0
							PTPRM		1	0	0	0	0	0	0
							PTPRN2		0	0	0	0	0	0	0
							PTPRT		0	1	0	0	0	0	0
							PTPRU		0	0	0	0	0	0	0
							PTRH2	inter+mi	1	0	0	0	0	0	0
							PTX3		0	0	0	0	0	0	0
							PUM1		0	0	0	0	0	0	0
							PURA		0	0	0	0	0	0	0
							PURB		0	0	0	0	0	0	0
							PVR		0	0	0	0	1	0	0
							PWP1		0	0	0	0	0	0	0
							PWP2		0	0	0	0	0	0	0
							PXDN		0	0	0	0	0	0	0
							PXN		0	0	0	0	0	0	0
							QDPR		0	0	0	0	0	0	0
							QKI		0	0	0	0	0	0	0
							QSER1		0	0	0	0	0	0	0
							RAB11FIP1		0	0	1	0	0	0	0
							RAB11FIP2		0	0	0	0	0	0	0
							RAB18		1	0	0	0	0	0	0
							RAB21		0	0	0	0	0	0	0
							RAB22A		0	0	0	0	0	0	0
							RAB24		1	0	0	0	0	0	0
							RAB26		1	0	0	0	0	0	0
							RAB27B		0	0	0	0	0	0	0
							RAB32		0	0	0	0	0	0	0
							RAB34	DB+intra+mi	0	0	0	0	0	0	0
							RAB37		1	0	0	0	0	0	0
							RAB3B		0	0	0	0	0	0	0
							RAB3C		0	0	0	0	0	0	0
							RAB3D		1	0	0	0	0	0	0
							RAB4A		0	0	0	0	0	0	0
							RAB5B	inter+mi	0	0	0	0	0	0	0
							RAB5C	DB+intra+mi	1	0	0	0	0	0	0
							RAB6A		1	0	0	0	0	0	0
							RAB8B		0	0	0	0	0	0	0
							RABEPK		0	0	0	0	0	0	0
							RABGAP1		0	0	0	0	0	0	0
							RABGAP1L		0	0	0	0	0	0	0
							RABL2A		0	0	0	0	0	0	0
							RABL2B		0	0	0	0	0	0	0
							RACGAP1		0	0	0	0	0	0	0
							RAD21		0	0	0	0	0	0	0
							RAD50		0	0	0	0	0	0	0
							RAET1E		0	0	0	0	0	0	0
							RALA		0	0	0	1	0	0	0
							RALB		0	0	0	0	0	0	0
							RALGDS		0	0	0	0	0	0	0
							RAN		0	0	0	0	0	0	0
							RANBP2		0	0	0	1	0	0	0
							RANBP6		0	0	0	0	0	0	0
							RAP1B	DB+intra+mi	0	0	0	1	0	0	0
							RAP2B		0	0	0	0	0	0	0
							RAPGEF2		0	0	0	0	0	0	0
							RAPGEF3		1	0	0	0	0	0	0
							RAPGEF4		0	0	0	0	0	0	0
							RARA		1	1	0	0	0	0	0
							RARB		0	0	0	0	0	0	0
							RARG		0	0	0	0	0	0	0
							RARRES2	inter+mi	0	0	0	0	0	0	0
							RASA1		0	0	0	0	0	0	0
							RASA3		1	0	0	0	0	0	0
							RASA4		0	0	0	0	0	0	0
							RASGEF1A		0	0	0	0	0	0	0
							RASGRP1		0	0	0	0	1	0	0
							RASSF1		0	0	0	0	0	0	0
[truncated: 784 more rows]
